# Supplementary material for: Modulation of the gut microbiota by processed food and natural food: evidence from the Siniperca chuatsi microbiome
Source: PeerJ journal article supplement (doi:10.7717/peerj.17520), 2024-06-14
Supplement: RawData.7z [file lefse_cladogram.1e-04.pdf › PeerJ Raw data/2.5.5.2_lefse_3/lefse_cladogram.1e-04.pdf]

Groups

- AF
- FB

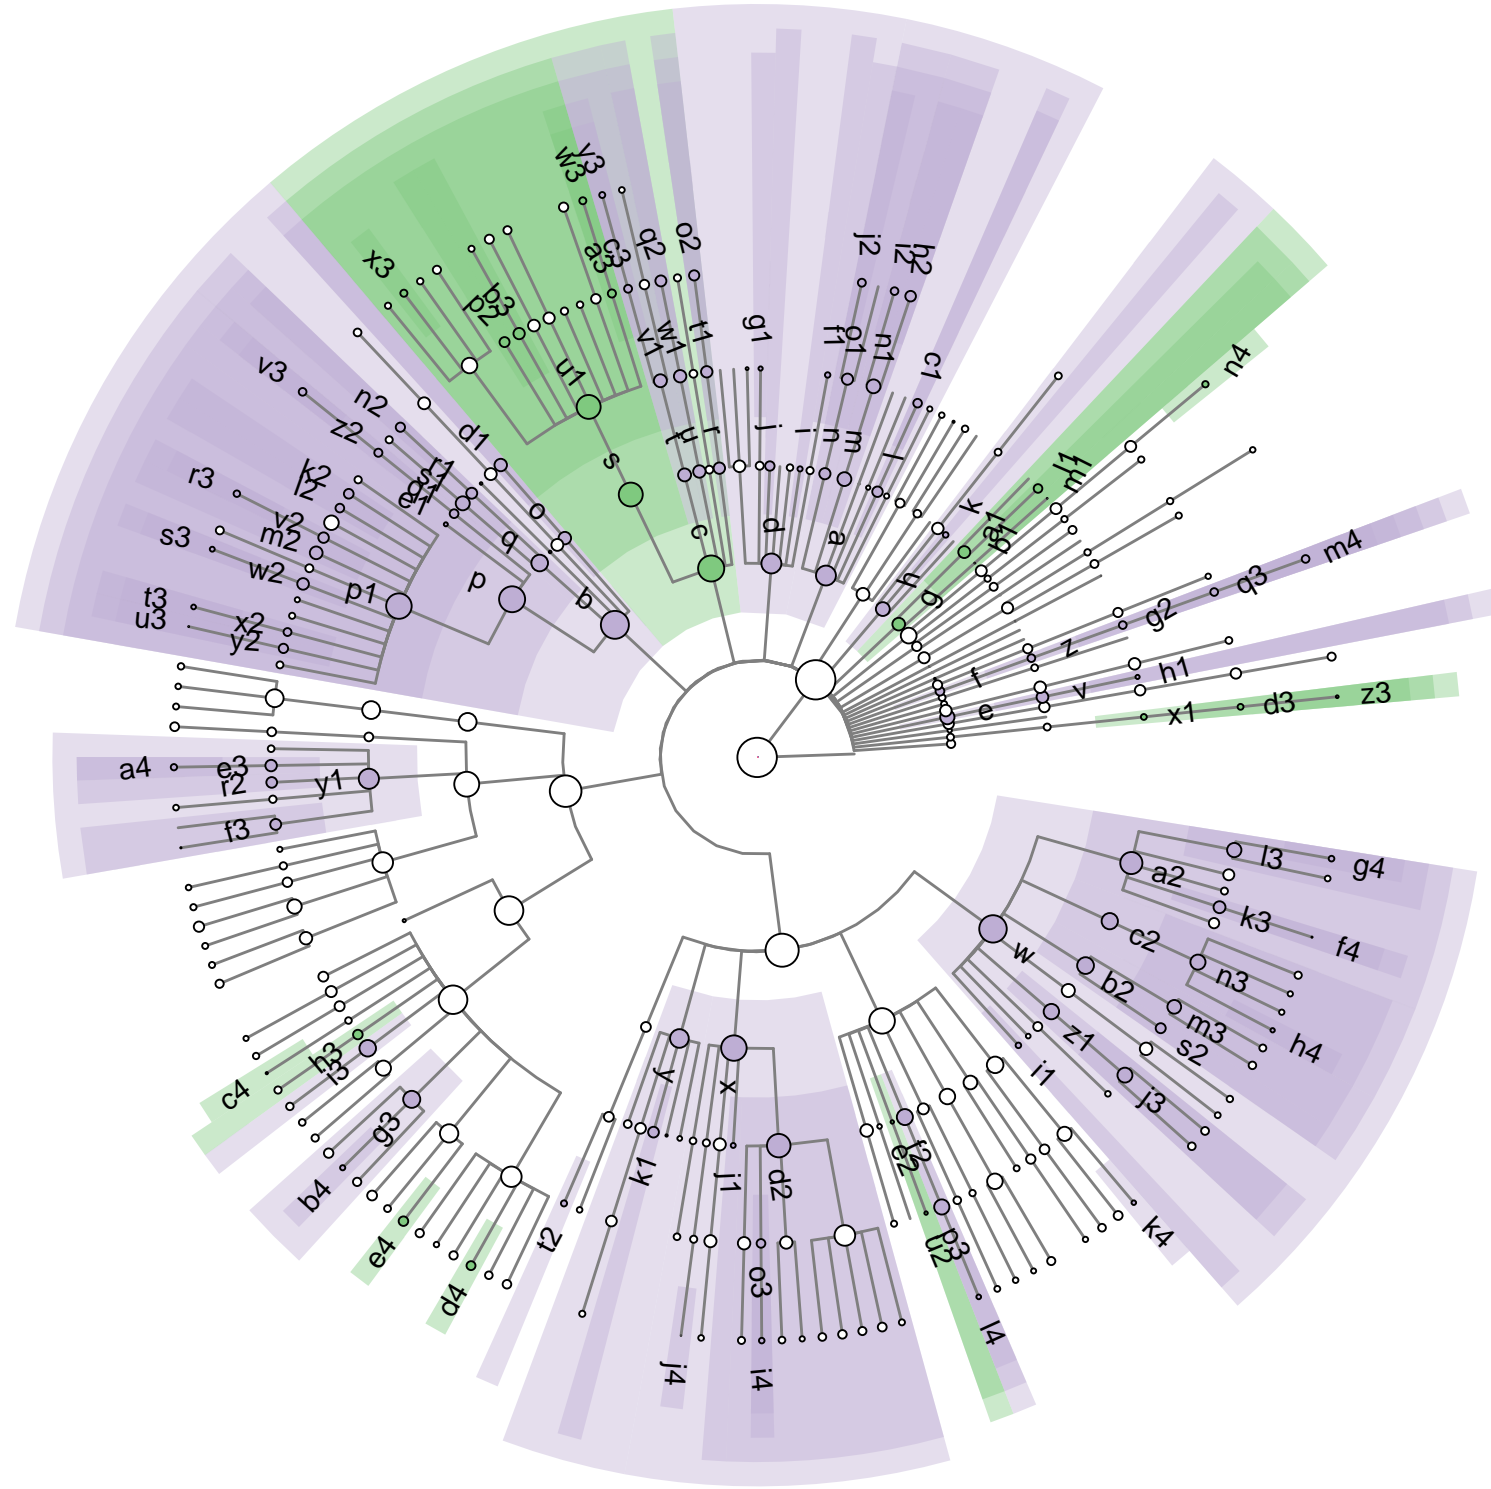

Taxa

|                           |                            |                            |                             |                                   |
|---------------------------|----------------------------|----------------------------|-----------------------------|-----------------------------------|
| a: p__Acidobacteria       | z: c__Spirochaetes         | y1: o__Bacillales          | x2: f__Streptomycetaceae    | w3: g__Butyricimonas              |
| b: p__Actinobacteria      | a1: c__Mollicutes          | z1: o__Caulobacterales     | y2: f__Streptosporangiaceae | x3: g__Paraprevotella             |
| c: p__Bacteroidetes       | b1: c__RF3                 | a2: o__Rhizobiales         | z2: f__Bifidobacteriaceae   | y3: g__Flavobacterium             |
| d: p__Chloroflexi         | c1: o__iii1_15             | b2: o__Rhodospirillales    | a3: f__[Odoribacteraceae]   | z3: g__Candidatus_Proteochlamydia |
| e: p__Gemmatimonadetes    | d1: o__Acidimicrobiales    | c2: o__Sphingomonadales    | b3: f__Rikenellaceae        | a4: f__Bacillaceae_g__Bacillus    |
| f: p__Spirochaetes        | e1: o__Micrococcales       | d2: o__Burkholderiales     | c3: f__Flavobacteriaceae    | b4: g__Proteiniclasticum          |
| g: p__Tenericutes         | f1: o__[Roseiflexales]     | e2: o__Pasteurellales      | d3: f__Parachlamydiaceae    | c4: g__Anaerofustis               |
| h: p__TM7                 | g1: o__B07_WMSP1           | f2: o__Xanthomonadales     | e3: f__Bacillaceae          | d4: g__Coproccoccus               |
| i: c__Ellin6529           | h1: o__Ellin5290           | g2: o__Spirochaetales      | f3: f__Planococcaceae       | e4: g__Oscillospira               |
| j: c__Thermomicrobia      | i1: o__Ellin329            | h2: f__Acidobacteriaceae   | g3: f__Clostridiaceae       | f4: g__Afipia                     |
| k: c__TM7_1               | j1: o__SC_I_84             | i2: f__Koribacteraceae     | h3: f__Peptococcaceae       | g4: g__Rhodoplanes                |
| l: c__Acidobacteria_6     | k1: o__Myxococcales        | j2: f__Solibacteraceae     | i3: f__Veillonellaceae      | h4: g__Kaistobacter               |
| m: c__Acidobacteriia      | l1: o__RF39                | k2: f__Geodermatophilaceae | j3: f__Caulobacteraceae     | i4: g__Burkholderia               |
| n: c__Solibacteres        | m1: o__ML615J_28           | l2: f__Intrasporangiaceae  | k3: f__Bradyrhizobiaceae    | j4: g__Nitrosomonas               |
| o: c__Acidimicrobiia      | n1: o__Acidobacteriales    | m2: f__Micromonosporaceae  | l3: f__Hyphomicrobiaceae    | k4: g__Psychrobacter              |
| p: c__Actinobacteria      | o1: o__Solibacterales      | n2: f__Gaiellaceae         | m3: f__Rhodospirillaceae    | l4: g__Rhodanobacter              |
| q: c__Thermoleophilia     | p1: o__Actinomycetales     | o2: f__Chitinophagaceae    | n3: f__Sphingomonadaceae    | m4: g__Treponema                  |
| r: c__[Saprospirae]       | q1: o__Bifidobacteriales   | p2: f__S24_7               | o3: f__Burkholderiaceae     | n4: g__Akkermansia                |
| s: c__Bacteroidia         | r1: o__Gaiellales          | q2: f__Sphingobacteriaceae | p3: f__Xanthomonadaceae     |                                   |
| t: c__Flavobacteriia      | s1: o__Solirubrobacterales | r2: f__Paenibacillaceae    | q3: f__Spirochaetaceae      |                                   |
| u: c__Sphingobacteriia    | t1: o__[Saprospirales]     | s2: f__Acetobacteraceae    | r3: g__Arthrobacter         |                                   |
| v: c__Gemmatimonadetes    | u1: o__Bacteroidales       | t2: f__Campylobacteraceae  | s3: g__Nocardioideae        |                                   |
| w: c__Alphaproteobacteria | v1: o__Flavobacteriales    | u2: f__Pasteurellaceae     | t3: g__Streptomyces         |                                   |
| x: c__Betaproteobacteria  | w1: o__Sphingobacteriales  | v2: f__Micrococcaceae      | u3: g__Planotetrastroma     |                                   |
| y: c__Deltaproteobacteria | x1: o__Chlamydiales        | w2: f__Nocardioideae       | v3: g__Bifidobacterium      |                                   |
