# Supplementary material for: Modulation of the gut microbiota by processed food and natural food: evidence from the Siniperca chuatsi microbiome
Source: PeerJ journal article supplement (doi:10.7717/peerj.17520), 2024-06-14
Supplement: RawData.7z [file lefse_cladogram.pdf › PeerJ Raw data/2.5.5.2_lefse_3/lefse_cladogram.pdf]

## Groups

■ AF  
■ FB

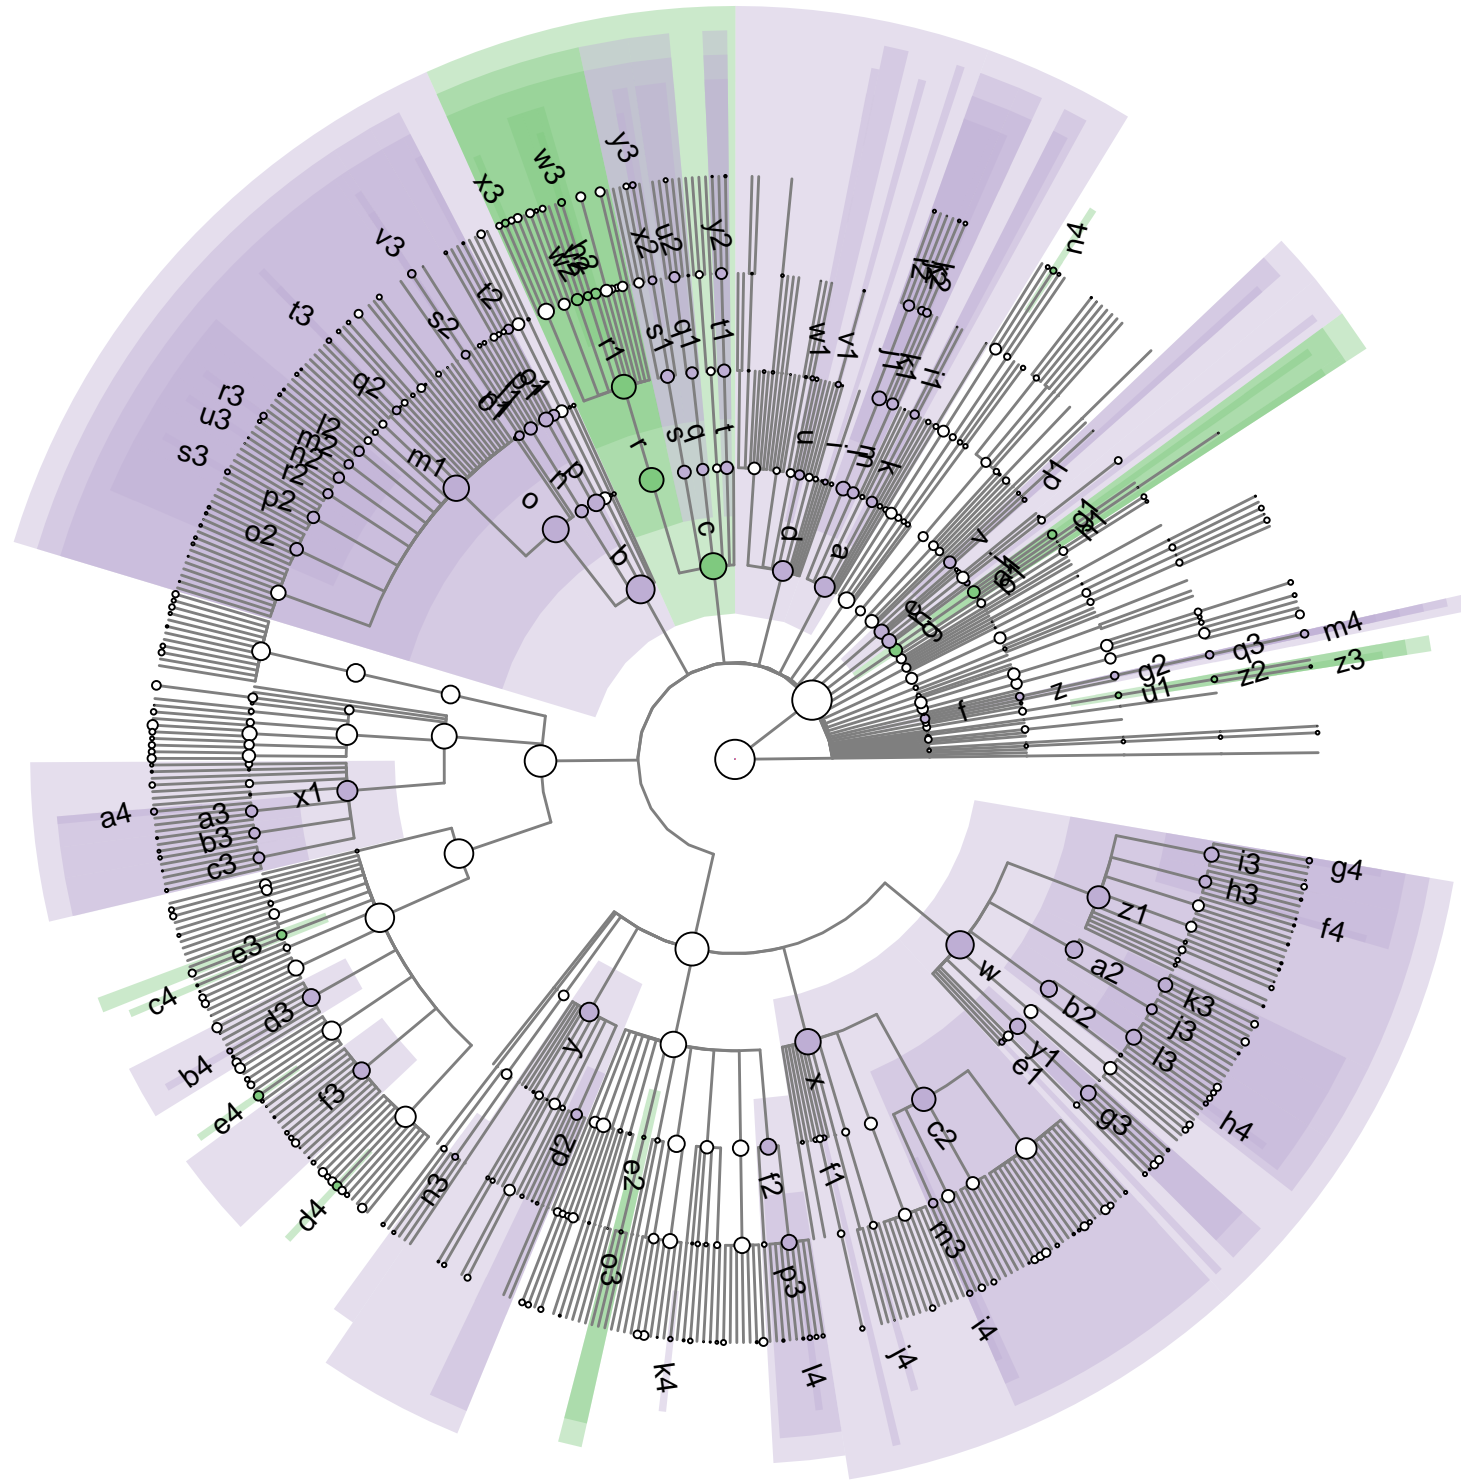

## Taxa

|                           |                             |                             |                            |                                   |
|---------------------------|-----------------------------|-----------------------------|----------------------------|-----------------------------------|
| a: p__Acidobacteria       | z: c__Spirochaetes          | y1: o__Caulobacteriales     | x2: f__Flavobacteriaceae   | w3: g__Butyricimonas              |
| b: p__Actinobacteria      | a1: c__Mollicutes           | z1: o__Rhizobiales          | y2: f__Sphingobacteriaceae | x3: g__Paraprevotella             |
| c: p__Bacteroidetes       | b1: c__RF3                  | a2: o__Rhodospirillales     | z2: f__Parachlamydiaceae   | y3: g__Flavobacterium             |
| d: p__Chloroflexi         | c1: o__Micrococcales        | b2: o__Sphingomonadales     | a3: f__Bacillaceae         | z3: g__Candidatus_Proteochlamydia |
| e: p__Gemmatimonadetes    | d1: o__Ellin5290            | c2: o__Burkholderiales      | b3: f__Paenibacillaceae    | a4: f__Bacillaceae_g__Bacillus    |
| f: p__Spirochaetes        | e1: o__Ellin329             | d2: o__Myxococcales         | c3: f__Planococcaceae      | b4: g__Proteiniclasticum          |
| g: p__Tenericutes         | f1: o__SC_I_84              | e2: o__Pasteurellales       | d3: f__Clostridiaceae      | c4: g__Anaerofustis               |
| h: p__TM7                 | g1: o__RF39                 | f2: o__Xanthomonadales      | e3: f__Peptococcaceae      | d4: g__Coprococcus                |
| i: c__Ellin6529           | h1: o__ML615J_28            | g2: o__Spirochaetales       | f3: f__Veillonellaceae     | e4: g__Oscillospira               |
| j: c__TM7_1               | i1: o__iii1_15              | h2: f__S24_7                | g3: f__Caulobacteraceae    | f4: g__Afipia                     |
| k: c__Acidobacteria_6     | j1: o__Acidobacteriales     | i2: f__Acidobacteriaceae    | h3: f__Bradyrhizobiaceae   | g4: g__Rhodoplanes                |
| l: c__Acidobacteriia      | k1: o__Solibacterales       | j2: f__Koribacteraceae      | i3: f__Hyphomicrobiaceae   | h4: g__Kaistobacter               |
| m: c__Solibacteres        | l1: o__Acidimicrobiales     | k2: f__Solibacteraceae      | j3: f__Acetobacteraceae    | i4: g__Burkholderia               |
| n: c__Acidimicrobia       | m1: o__Actinomycetales      | l2: f__Geodermatophilaceae  | k3: f__Rhodospirillaceae   | j4: g__Nitrosomonas               |
| o: c__Actinobacteria      | n1: o__Bifidobacteriales    | m2: f__Intrasporangiaceae   | l3: f__Sphingomonadaceae   | k4: g__Psychrobacter              |
| p: c__Thermoleophilina    | o1: o__Gaiellales           | n2: f__Micrococcaceae       | m3: f__Burkholderiaceae    | l4: g__Rhodanobacter              |
| q: c__[Saprospirae]       | p1: o__Solirubrobacteriales | o2: f__Micromonosporaceae   | n3: f__Campylobacteraceae  | m4: g__Treponema                  |
| r: c__Bacteroidia         | q1: o__[Saprospirales]      | p2: f__Nocardioideae        | o3: f__Pasteurellaceae     | n4: g__Akkermansia                |
| s: c__Flavobacteriia      | r1: o__Bacteroidales        | q2: f__Streptomycetaceae    | p3: f__Xanthomonadaceae    |                                   |
| t: c__Sphingobacteriia    | s1: o__Flavobacteriales     | r2: f__Streptosporangiaceae | q3: f__Spirochaetaceae     |                                   |
| u: c__Thermomicrobia      | t1: o__Sphingobacteriales   | s2: f__Bifidobacteriaceae   | r3: g__Arthrobacter        |                                   |
| v: c__Gemmatimonadetes    | u1: o__Chlamydiales         | t2: f__Gaiellaceae          | s3: g__Nocardioides        |                                   |
| w: c__Alphaproteobacteria | v1: o__[Roseiflexales]      | u2: f__Chitinophagaceae     | t3: g__Streptomyces        |                                   |
| x: c__Betaproteobacteria  | w1: o__B07_WMSP1            | v2: f__[Odoribacteraceae]   | u3: g__Planotetraspora     |                                   |
| y: c__Deltaproteobacteria | x1: o__Bacillales           | w2: f__Rikenellaceae        | v3: g__Bifidobacterium     |                                   |
