# Supplementary material for: Modulation of the gut microbiota by processed food and natural food: evidence from the Siniperca chuatsi microbiome
Source: PeerJ journal article supplement (doi:10.7717/peerj.17520), 2024-06-14
Supplement: RawData.7z [file length.xls]

length	count
236	25	5900
239	65	15535
240	23	5520
253	3	759
260	9	2340
261	102	26622
262	63	16506
263	280	73640
264	54	14256
279	4	1116
293	35	10255
308	34	10472
327	47	15369
333	32	10656
361	69	24909
368	30	11040
380	29	11020
389	8	3112
392	29	11368
399	3	1197
403	58	23374
404	38861	15699844
405	106350	43071750
406	40632	16496592
407	16315	6640205
408	55522	22652976
409	1673	684257
410	17231	7064710
411	2192	900912
412	818	337016
413	207	85491
414	1199	496386
415	104	43160
416	112	46592
417	1348	562116
418	2654	1109372
419	770	322630
420	384	161280
421	881	370901
422	2424	1022928
423	906	383238
424	31899	13525176
425	58031	24663175
426	4263	1816038
427	724	309148
428	476	203728
429	7376	3164304
430	139673	60059390
431	13766	5933146
432	508	219456
433	44	19052
434	47	20398
438	14	6132
	548406	228386465	416.4550807
