# Supplementary material for: Modulation of the gut microbiota by processed food and natural food: evidence from the Siniperca chuatsi microbiome
Source: PeerJ journal article supplement (doi:10.7717/peerj.17520), 2024-06-14
Supplement: RawData.7z [file seqs_process_stat.xls]

SampleID	Input	Filtered	Denoised	Merged	Non-chimeric	Non-singleton
AF1	121590	113960	111310	105404	88729	88069
AF2	108012	101015	98439	92130	74042	73473
AF3	93073	87264	84712	79602	66331	65764
FB1	207043	194875	188075	171862	134731	133265
FB2	124786	116184	111672	101051	90445	89419
FB3	126116	117862	113648	103938	94128	93212
