# Supplementary material for: Modulation of the gut microbiota by processed food and natural food: evidence from the Siniperca chuatsi microbiome
Source: PeerJ journal article supplement (doi:10.7717/peerj.17520), 2024-06-14
Supplement: RawData.7z [file summary.xls]

ID	domain	phylum	class	order	family	genus	species	unclassified
AF1	45	5	16	331	664	503	147	0
AF2	22	3	27	364	525	428	127	0
AF3	39	4	17	369	597	438	118	0
FB1	173	45	150	757	1182	875	348	0
FB2	127	19	129	600	958	766	269	0
FB3	112	26	133	487	930	893	308	0
