# Supplementary material for: Modulation of the gut microbiota by processed food and natural food: evidence from the Siniperca chuatsi microbiome
Source: PeerJ journal article supplement (doi:10.7717/peerj.17520), 2024-06-14
Supplement: RawData.7z [file table_f_even_depth_w_tax.xls]

# Constructed from biom file
#OTU ID	AF1	AF2	AF3	FB1	FB2	FB3	taxonomy
ASV_24553	37.0	56.0	41.0	77.0	116.0	152.0	d__Bacteria; p__Proteobacteria; c__Gammaproteobacteria; o__Enterobacteriales; f__Enterobacteriaceae; g__unclassified_Enterobacteriaceae; s__unclassified_Enterobacteriaceae
ASV_17591	17.0	21.0	25.0	43.0	36.0	15.0	d__Bacteria; p__Proteobacteria; c__Gammaproteobacteria; o__Enterobacteriales; f__Enterobacteriaceae; g__unclassified_Enterobacteriaceae; s__unclassified_Enterobacteriaceae
ASV_2846	263.0	68.0	521.0	287.0	770.0	110.0	d__Bacteria; p__Proteobacteria; c__Betaproteobacteria; o__Burkholderiales; f__Comamonadaceae; g__Aquabacterium; s__unidentified_Aquabacterium
ASV_23310	11.0	15.0	6.0	23.0	39.0	127.0	d__Bacteria; p__Proteobacteria; c__Alphaproteobacteria; o__Rhizobiales; f__Bradyrhizobiaceae; g__unclassified_Bradyrhizobiaceae; s__unclassified_Bradyrhizobiaceae
ASV_19142	16.0	13.0	12.0	7.0	9.0	22.0	d__Bacteria; p__Proteobacteria; c__Gammaproteobacteria; o__Pseudomonadales; f__Pseudomonadaceae; g__Pseudomonas; s__unclassified_Pseudomonas
ASV_21352	388.0	9902.0	89.0	317.0	126.0	140.0	d__Bacteria; p__Firmicutes; c__Bacilli; o__Lactobacillales; f__Lactobacillaceae; g__Lactobacillus; s__unidentified_Lactobacillus
ASV_23583	0.0	0.0	24.0	0.0	9.0	10.0	d__Bacteria; p__Proteobacteria; c__Gammaproteobacteria; o__Enterobacteriales; f__Enterobacteriaceae; g__unclassified_Enterobacteriaceae; s__unclassified_Enterobacteriaceae
ASV_6438	0.0	27.0	25.0	0.0	0.0	0.0	d__Bacteria; p__Firmicutes; c__Bacilli; o__Lactobacillales; f__Lactobacillaceae; g__Lactobacillus; s__Lactobacillus_manihotivorans
ASV_7520	17.0	1219.0	330.0	9.0	4881.0	53.0	d__Bacteria; p__Fusobacteria; c__Fusobacteriia; o__Fusobacteriales; f__Fusobacteriaceae; g__Cetobacterium; s__Cetobacterium_somerae
ASV_4011	133.0	80.0	273.0	589.0	276.0	354.0	d__Bacteria; p__Firmicutes; c__Clostridia; o__Clostridiales; f__Clostridiaceae; g__unidentified_Clostridiaceae; s__unidentified_Clostridiaceae
ASV_12318	12.0	1811.0	31.0	4354.0	179.0	2361.0	d__Bacteria; p__Firmicutes; c__Bacilli; o__Lactobacillales; f__Lactobacillaceae; g__Lactobacillus; s__Lactobacillus_hamsteri
ASV_6450	3614.0	356.0	8024.0	3195.0	1096.0	2647.0	d__Bacteria; p__Firmicutes; c__Bacilli; o__Lactobacillales; f__Lactobacillaceae; g__Lactobacillus; s__unclassified_Lactobacillus
ASV_3649	0.0	7.0	0.0	19.0	0.0	0.0	d__Bacteria; p__Proteobacteria; c__Gammaproteobacteria; o__Pseudomonadales; f__Pseudomonadaceae; g__Pseudomonas; s__Pseudomonas_fragi
ASV_23612	9.0	14.0	3.0	0.0	1629.0	7.0	d__Bacteria; p__Proteobacteria; c__Gammaproteobacteria; o__Enterobacteriales; f__Enterobacteriaceae; g__unclassified_Enterobacteriaceae; s__unclassified_Enterobacteriaceae
ASV_8507	0.0	0.0	0.0	9.0	0.0	8.0	d__Bacteria; p__Firmicutes; c__Clostridia; o__Clostridiales; f__unidentified_Clostridiales; g__unidentified_Clostridiales; s__unidentified_Clostridiales
ASV_9431	0.0	6.0	0.0	2.0	0.0	4.0	d__Bacteria; p__Firmicutes; c__Bacilli; o__Lactobacillales; f__Streptococcaceae; g__Streptococcus; s__unidentified_Streptococcus
ASV_2250	783.0	38.0	18.0	2.0	6.0	12.0	d__Bacteria; p__Verrucomicrobia; c__Verrucomicrobiae; o__Verrucomicrobiales; f__Verrucomicrobiaceae; g__Akkermansia; s__Akkermansia_muciniphila
ASV_7416	0.0	0.0	12.0	0.0	0.0	3.0	d__Bacteria; p__Proteobacteria; c__Gammaproteobacteria; o__Enterobacteriales; f__Enterobacteriaceae; g__unclassified_Enterobacteriaceae; s__unclassified_Enterobacteriaceae
ASV_818	0.0	32.0	0.0	0.0	0.0	0.0	d__Bacteria; p__Proteobacteria; c__Gammaproteobacteria; o__Aeromonadales; f__Aeromonadaceae; g__Aeromonas; s__unclassified_Aeromonas
ASV_24453	0.0	0.0	0.0	23.0	12.0	9.0	d__Bacteria; p__Firmicutes; c__Erysipelotrichi; o__Erysipelotrichales; f__Erysipelotrichaceae; g__Allobaculum; s__unidentified_Allobaculum
ASV_6687	4.0	0.0	13.0	0.0	33.0	37.0	d__Bacteria; p__Proteobacteria; c__Alphaproteobacteria; o__Sphingomonadales; f__Sphingomonadaceae; g__Novosphingobium; s__Novosphingobium_capsulatum
ASV_23449	0.0	7.0	0.0	0.0	0.0	1.0	d__Bacteria; p__Proteobacteria; c__Gammaproteobacteria; o__Pasteurellales; f__Pasteurellaceae; g__Haemophilus; s__Haemophilus_parainfluenzae
ASV_11986	24.0	0.0	0.0	0.0	0.0	0.0	d__Bacteria; p__Firmicutes; c__Clostridia; o__Clostridiales; f__unidentified_Clostridiales; g__unidentified_Clostridiales; s__unidentified_Clostridiales
ASV_13783	0.0	18.0	0.0	0.0	0.0	0.0	d__Bacteria; p__Bacteroidetes; c__Bacteroidia; o__Bacteroidales; f__Bacteroidaceae; g__Bacteroides; s__Bacteroides_acidifaciens
ASV_14600	0.0	0.0	4.0	0.0	2.0	1.0	d__Bacteria; p__Tenericutes; c__Mollicutes; o__unidentified_Mollicutes; f__unidentified_Mollicutes; g__unidentified_Mollicutes; s__unidentified_Mollicutes
ASV_8502	0.0	0.0	29.0	0.0	0.0	0.0	d__Bacteria; p__Firmicutes; c__Clostridia; o__Clostridiales; f__unclassified_Clostridiales; g__unclassified_Clostridiales; s__unclassified_Clostridiales
ASV_2347	10.0	0.0	0.0	3.0	5.0	0.0	d__Bacteria; p__Bacteroidetes; c__Bacteroidia; o__Bacteroidales; f__S24-7; g__unidentified_S24-7; s__unidentified_S24-7
ASV_18991	0.0	0.0	0.0	0.0	4.0	0.0	d__Bacteria; p__Fusobacteria; c__Fusobacteriia; o__Fusobacteriales; f__Fusobacteriaceae; g__Fusobacterium; s__unidentified_Fusobacterium
ASV_22784	0.0	0.0	0.0	0.0	4.0	0.0	d__Bacteria; p__Proteobacteria; c__Betaproteobacteria; o__Neisseriales; f__Neisseriaceae; g__Neisseria; s__unclassified_Neisseria
ASV_12278	6.0	0.0	12.0	0.0	0.0	0.0	d__Bacteria; p__Proteobacteria; c__Gammaproteobacteria; o__Enterobacteriales; f__Enterobacteriaceae; g__unclassified_Enterobacteriaceae; s__unclassified_Enterobacteriaceae
ASV_1996	2.0	0.0	0.0	0.0	0.0	0.0	d__Bacteria; p__Tenericutes; c__Mollicutes; o__RsaHF231; f__unidentified_RsaHF231; g__unidentified_RsaHF231; s__unidentified_RsaHF231
ASV_14904	5.0	0.0	0.0	0.0	0.0	0.0	d__Bacteria; p__Proteobacteria; c__Gammaproteobacteria; o__Enterobacteriales; f__Enterobacteriaceae; g__unclassified_Enterobacteriaceae; s__unclassified_Enterobacteriaceae
ASV_520	361.0	1692.0	1121.0	3523.0	155.0	377.0	d__Bacteria; p__Firmicutes; c__Clostridia; o__Clostridiales; f__Peptostreptococcaceae; g__unidentified_Peptostreptococcaceae; s__unidentified_Peptostreptococcaceae
ASV_19426	0.0	4.0	3.0	3.0	2.0	4.0	d__Bacteria; p__Proteobacteria; c__Gammaproteobacteria; o__Enterobacteriales; f__Enterobacteriaceae; g__Pseudomonas; s__Pseudomonas_syringae
ASV_24518	34.0	0.0	13.0	7.0	8.0	8.0	d__Bacteria; p__Firmicutes; c__Bacilli; o__Lactobacillales; f__Streptococcaceae; g__Lactococcus; s__unidentified_Lactococcus
ASV_8405	12.0	0.0	8.0	0.0	0.0	0.0	d__Bacteria; p__Proteobacteria; c__Gammaproteobacteria; o__Enterobacteriales; f__Enterobacteriaceae; g__Hafnia; s__Hafnia_alvei
ASV_4205	7.0	0.0	0.0	0.0	0.0	0.0	d__Bacteria; p__Proteobacteria; c__Gammaproteobacteria; o__Enterobacteriales; f__Enterobacteriaceae; g__unclassified_Enterobacteriaceae; s__unclassified_Enterobacteriaceae
ASV_2729	5.0	2.0	0.0	0.0	0.0	0.0	d__Bacteria; p__Proteobacteria; c__Betaproteobacteria; o__Neisseriales; f__Neisseriaceae; g__Neisseria; s__unclassified_Neisseria
ASV_9192	186.0	50.0	4.0	0.0	33.0	246.0	d__Bacteria; p__Bacteroidetes; c__Bacteroidia; o__Bacteroidales; f__Bacteroidaceae; g__Bacteroides; s__Bacteroides_uniformis
ASV_12927	9.0	9.0	26.0	0.0	0.0	0.0	d__Bacteria; p__Firmicutes; c__Bacilli; o__Lactobacillales; f__Enterococcaceae; g__Enterococcus; s__unclassified_Enterococcus
ASV_25999	0.0	0.0	8.0	0.0	0.0	0.0	d__Bacteria; p__Bacteroidetes; c__Flavobacteriia; o__Flavobacteriales; f__Flavobacteriaceae; g__Flavobacterium; s__Flavobacterium_frigidarium
ASV_1598	0.0	15.0	0.0	0.0	0.0	0.0	d__Bacteria; p__Actinobacteria; c__Actinobacteria; o__Actinomycetales; f__Beutenbergiaceae; g__unclassified_Beutenbergiaceae; s__unclassified_Beutenbergiaceae
ASV_19525	0.0	17.0	0.0	0.0	0.0	0.0	d__Bacteria; p__Proteobacteria; c__Gammaproteobacteria; o__Enterobacteriales; f__Enterobacteriaceae; g__Edwardsiella; s__unidentified_Edwardsiella
ASV_772	0.0	0.0	0.0	5.0	13.0	0.0	d__Bacteria; p__Firmicutes; c__Bacilli; o__Lactobacillales; f__Lactobacillaceae; g__Lactobacillus; s__unidentified_Lactobacillus
ASV_7821	0.0	0.0	0.0	11.0	0.0	0.0	d__Bacteria; p__Actinobacteria; c__Actinobacteria; o__Actinomycetales; f__Micrococcaceae; g__Rothia; s__Rothia_mucilaginosa
ASV_9241	0.0	0.0	0.0	11.0	0.0	0.0	d__Bacteria; p__Firmicutes; c__Bacilli; o__Lactobacillales; f__Streptococcaceae; g__Streptococcus; s__unidentified_Streptococcus
ASV_167	0.0	0.0	8.0	0.0	0.0	0.0	d__Bacteria; p__Bacteroidetes; c__Bacteroidia; o__Bacteroidales; f__Bacteroidaceae; g__Bacteroides; s__Bacteroides_acidifaciens
ASV_13138	0.0	0.0	0.0	0.0	0.0	13.0	d__Bacteria; p__Bacteroidetes; c__Bacteroidia; o__Bacteroidales; f__S24-7; g__unidentified_S24-7; s__unidentified_S24-7
ASV_23316	0.0	0.0	0.0	1.0	4.0	0.0	d__Bacteria; p__Firmicutes; c__Erysipelotrichi; o__Erysipelotrichales; f__Erysipelotrichaceae; g__Allobaculum; s__unidentified_Allobaculum
ASV_11799	10.0	0.0	0.0	0.0	0.0	26.0	d__Bacteria; p__Proteobacteria; c__Betaproteobacteria; o__Burkholderiales; f__Comamonadaceae; g__Delftia; s__unidentified_Delftia
ASV_17337	0.0	0.0	0.0	8.0	0.0	0.0	d__Bacteria; p__Bacteroidetes; c__Bacteroidia; o__Bacteroidales; f__Bacteroidaceae; g__Bacteroides; s__unidentified_Bacteroides
ASV_10529	0.0	0.0	0.0	0.0	0.0	9.0	d__Bacteria; p__Firmicutes; c__Erysipelotrichi; o__Erysipelotrichales; f__Erysipelotrichaceae; g__Allobaculum; s__unidentified_Allobaculum
ASV_9643	0.0	0.0	0.0	0.0	10.0	0.0	d__Bacteria; p__Firmicutes; c__Clostridia; o__Clostridiales; f__Lachnospiraceae; g__unidentified_Lachnospiraceae; s__unidentified_Lachnospiraceae
ASV_25718	5.0	0.0	0.0	0.0	0.0	0.0	d__Bacteria; p__Proteobacteria; c__Gammaproteobacteria; o__Pseudomonadales; f__Moraxellaceae; g__Acinetobacter; s__unidentified_Acinetobacter
ASV_9356	0.0	0.0	3.0	0.0	3.0	3.0	d__Bacteria; p__Proteobacteria; c__Gammaproteobacteria; o__Enterobacteriales; f__Enterobacteriaceae; g__Pseudomonas; s__Pseudomonas_syringae
ASV_22149	0.0	0.0	0.0	7.0	0.0	0.0	d__Bacteria; p__Actinobacteria; c__Actinobacteria; o__Actinomycetales; f__Micrococcaceae; g__unclassified_Micrococcaceae; s__unclassified_Micrococcaceae
ASV_1648	0.0	0.0	0.0	4.0	0.0	0.0	d__Bacteria; p__Firmicutes; c__Clostridia; o__Clostridiales; f__Lachnospiraceae; g__unclassified_Lachnospiraceae; s__unclassified_Lachnospiraceae
ASV_14393	0.0	0.0	0.0	1.0	0.0	0.0	d__Bacteria; p__Proteobacteria; c__Gammaproteobacteria; o__Enterobacteriales; f__Enterobacteriaceae; g__unclassified_Enterobacteriaceae; s__unclassified_Enterobacteriaceae
ASV_8127	0.0	13.0	0.0	0.0	0.0	0.0	d__Bacteria; p__Proteobacteria; c__Gammaproteobacteria; o__Pseudomonadales; f__Pseudomonadaceae; g__Pseudomonas; s__Pseudomonas_fragi
ASV_13031	0.0	3.0	7.0	0.0	86.0	0.0	d__Bacteria; p__Firmicutes; c__Clostridia; o__Clostridiales; f__unidentified_Clostridiales; g__unidentified_Clostridiales; s__unidentified_Clostridiales
ASV_6149	0.0	0.0	4.0	0.0	5.0	0.0	d__Bacteria; p__Proteobacteria; c__Gammaproteobacteria; o__Aeromonadales; f__Aeromonadaceae; g__Aeromonas; s__unclassified_Aeromonas
ASV_1425	0.0	0.0	0.0	0.0	28.0	0.0	d__Bacteria; p__Firmicutes; c__Clostridia; o__Clostridiales; f__unidentified_Clostridiales; g__unidentified_Clostridiales; s__unidentified_Clostridiales
ASV_9023	0.0	0.0	0.0	5.0	0.0	0.0	d__Bacteria; p__Proteobacteria; c__Gammaproteobacteria; o__Alteromonadales; f__Shewanellaceae; g__Shewanella; s__unidentified_Shewanella
ASV_25786	2.0	2.0	2.0	0.0	0.0	0.0	d__Bacteria; p__Firmicutes; c__Bacilli; o__Lactobacillales; f__Lactobacillaceae; g__Lactobacillus; s__unidentified_Lactobacillus
ASV_9506	0.0	11.0	0.0	0.0	0.0	0.0	d__Bacteria; p__Proteobacteria; c__Gammaproteobacteria; o__Pseudomonadales; f__Pseudomonadaceae; g__Pseudomonas; s__Pseudomonas_fragi
ASV_11519	0.0	8.0	0.0	0.0	0.0	0.0	d__Bacteria; p__Proteobacteria; c__Gammaproteobacteria; o__Enterobacteriales; f__Enterobacteriaceae; g__unclassified_Enterobacteriaceae; s__unclassified_Enterobacteriaceae
ASV_14231	0.0	0.0	10.0	0.0	0.0	0.0	d__Bacteria; p__Bacteroidetes; c__Bacteroidia; o__Bacteroidales; f__S24-7; g__unidentified_S24-7; s__unidentified_S24-7
ASV_7517	169.0	112.0	73.0	0.0	0.0	32.0	d__Bacteria; p__Bacteroidetes; c__Bacteroidia; o__Bacteroidales; f__[Paraprevotellaceae]; g__[Prevotella]; s__unidentified_[Prevotella]
ASV_3431	61.0	174.0	233.0	0.0	0.0	0.0	d__Bacteria; p__Bacteroidetes; c__Bacteroidia; o__Bacteroidales; f__S24-7; g__unidentified_S24-7; s__unidentified_S24-7
ASV_20536	0.0	0.0	3.0	0.0	0.0	0.0	d__Bacteria; p__Firmicutes; c__Bacilli; o__Lactobacillales; f__Streptococcaceae; g__Streptococcus; s__unidentified_Streptococcus
ASV_5421	0.0	0.0	2.0	0.0	0.0	0.0	d__Bacteria; p__Proteobacteria; c__Gammaproteobacteria; o__Enterobacteriales; f__Enterobacteriaceae; g__Pseudomonas; s__Pseudomonas_syringae
ASV_12405	48.0	28.0	176.0	72.0	148.0	21.0	d__Bacteria; p__Proteobacteria; c__Alphaproteobacteria; o__Rhodospirillales; f__Rhodospirillaceae; g__Azospirillum; s__unidentified_Azospirillum
ASV_24213	2.0	25.0	0.0	0.0	0.0	0.0	d__Bacteria; p__Firmicutes; c__Clostridia; o__Clostridiales; f__Ruminococcaceae; g__Oscillospira; s__unidentified_Oscillospira
ASV_15694	0.0	0.0	0.0	0.0	9.0	0.0	d__Bacteria; p__Bacteroidetes; c__Bacteroidia; o__Bacteroidales; f__Bacteroidaceae; g__Bacteroides; s__Bacteroides_uniformis
ASV_26128	0.0	0.0	0.0	0.0	0.0	7.0	d__Bacteria; p__Firmicutes; c__Bacilli; o__Bacillales; f__Planococcaceae; g__unclassified_Planococcaceae; s__unclassified_Planococcaceae
ASV_2551	0.0	0.0	0.0	0.0	0.0	8.0	d__Bacteria; p__Proteobacteria; c__Betaproteobacteria; o__Burkholderiales; f__Comamonadaceae; g__unclassified_Comamonadaceae; s__unclassified_Comamonadaceae
ASV_8258	7.0	0.0	0.0	0.0	0.0	0.0	d__Bacteria; p__Bacteroidetes; c__Bacteroidia; o__Bacteroidales; f__S24-7; g__unidentified_S24-7; s__unidentified_S24-7
ASV_25644	1184.0	13.0	293.0	0.0	0.0	0.0	d__Bacteria; p__Actinobacteria; c__Actinobacteria; o__Actinomycetales; f__Microbacteriaceae; g__unclassified_Microbacteriaceae; s__unclassified_Microbacteriaceae
ASV_17136	0.0	0.0	0.0	3.0	0.0	0.0	d__Bacteria; p__Proteobacteria; c__Gammaproteobacteria; o__Enterobacteriales; f__Enterobacteriaceae; g__unclassified_Enterobacteriaceae; s__unclassified_Enterobacteriaceae
ASV_10431	0.0	0.0	0.0	4.0	0.0	0.0	d__Bacteria; p__Bacteroidetes; c__Bacteroidia; o__Bacteroidales; f__Prevotellaceae; g__Prevotella; s__Prevotella_melaninogenica
ASV_14312	0.0	0.0	0.0	3.0	0.0	0.0	d__Bacteria; p__Proteobacteria; c__Betaproteobacteria; o__Burkholderiales; f__Comamonadaceae; g__Aquabacterium; s__unidentified_Aquabacterium
ASV_20628	0.0	0.0	0.0	0.0	3.0	4.0	d__Bacteria; p__Actinobacteria; c__Coriobacteriia; o__Coriobacteriales; f__Coriobacteriaceae; g__unidentified_Coriobacteriaceae; s__unidentified_Coriobacteriaceae
ASV_13806	25.0	5.0	117.0	61.0	141.0	29.0	d__Bacteria; p__Proteobacteria; c__Betaproteobacteria; o__Burkholderiales; f__Comamonadaceae; g__Aquabacterium; s__unidentified_Aquabacterium
ASV_21465	5.0	0.0	0.0	0.0	0.0	0.0	d__Bacteria; p__Nitrospirae; c__Nitrospira; o__Nitrospirales; f__0319-6A21; g__unidentified_0319-6A21; s__unidentified_0319-6A21
ASV_16890	0.0	0.0	1.0	1.0	1.0	1.0	d__Bacteria; p__Proteobacteria; c__Alphaproteobacteria; o__Rhizobiales; f__Bradyrhizobiaceae; g__unclassified_Bradyrhizobiaceae; s__unclassified_Bradyrhizobiaceae
ASV_5231	0.0	7.0	0.0	0.0	0.0	0.0	d__Bacteria; p__Proteobacteria; c__Gammaproteobacteria; o__Pseudomonadales; f__Pseudomonadaceae; g__Pseudomonas; s__Pseudomonas_fragi
ASV_22495	0.0	5.0	0.0	0.0	0.0	0.0	d__Bacteria; p__Firmicutes; c__Clostridia; o__Clostridiales; f__unidentified_Clostridiales; g__unidentified_Clostridiales; s__unidentified_Clostridiales
ASV_2878	0.0	4.0	0.0	0.0	0.0	0.0	d__Bacteria; p__Proteobacteria; c__Gammaproteobacteria; o__Oceanospirillales; f__Oceanospirillaceae; g__unidentified_Oceanospirillaceae; s__unidentified_Oceanospirillaceae
ASV_4050	0.0	3.0	4.0	0.0	0.0	0.0	d__Bacteria; p__Bacteroidetes; c__[Saprospirae]; o__[Saprospirales]; f__Chitinophagaceae; g__Flavisolibacter; s__unidentified_Flavisolibacter
ASV_1464	0.0	0.0	61.0	30.0	0.0	0.0	d__Bacteria; p__Firmicutes; c__Bacilli; o__Lactobacillales; f__Lactobacillaceae; g__Lactobacillus; s__Lactobacillus_vaginalis
ASV_2155	0.0	0.0	7.0	0.0	0.0	0.0	d__Bacteria; p__Bacteroidetes; c__Bacteroidia; o__Bacteroidales; f__S24-7; g__unidentified_S24-7; s__unidentified_S24-7
ASV_25550	0.0	0.0	0.0	0.0	3.0	2.0	d__Bacteria; p__Proteobacteria; c__Gammaproteobacteria; o__Enterobacteriales; f__Enterobacteriaceae; g__unclassified_Enterobacteriaceae; s__unclassified_Enterobacteriaceae
ASV_24188	0.0	0.0	0.0	4.0	0.0	0.0	d__Bacteria; p__Firmicutes; c__Clostridia; o__Clostridiales; f__Veillonellaceae; g__Veillonella; s__Veillonella_dispar
ASV_21714	0.0	0.0	0.0	2.0	0.0	0.0	d__Bacteria; p__Firmicutes; c__Bacilli; o__Lactobacillales; f__Streptococcaceae; g__Streptococcus; s__unidentified_Streptococcus
ASV_10029	0.0	0.0	0.0	46.0	2.0	90.0	d__Bacteria; p__Proteobacteria; c__Alphaproteobacteria; o__Sphingomonadales; f__Sphingomonadaceae; g__Kaistobacter; s__unidentified_Kaistobacter
ASV_8559	0.0	0.0	0.0	2.0	0.0	0.0	d__Bacteria; p__Actinobacteria; c__Actinobacteria; o__Actinomycetales; f__Micrococcaceae; g__Rothia; s__Rothia_dentocariosa
ASV_15746	0.0	0.0	0.0	0.0	3.0	0.0	d__Bacteria; p__Actinobacteria; c__Actinobacteria; o__Actinomycetales; f__Micrococcaceae; g__Arthrobacter; s__unclassified_Arthrobacter
ASV_16952	0.0	0.0	0.0	0.0	7.0	0.0	d__Bacteria; p__Proteobacteria; c__Gammaproteobacteria; o__Alteromonadales; f__Shewanellaceae; g__Shewanella; s__unidentified_Shewanella
ASV_9142	0.0	0.0	0.0	0.0	3.0	0.0	d__Bacteria; p__Proteobacteria; c__Betaproteobacteria; o__Burkholderiales; f__Comamonadaceae; g__unclassified_Comamonadaceae; s__unclassified_Comamonadaceae
ASV_25097	0.0	0.0	0.0	0.0	0.0	6.0	d__Bacteria; p__Actinobacteria; c__Actinobacteria; o__Actinomycetales; f__unclassified_Actinomycetales; g__unclassified_Actinomycetales; s__unclassified_Actinomycetales
ASV_20040	4.0	0.0	0.0	0.0	0.0	0.0	d__Bacteria; p__Bacteroidetes; c__[Saprospirae]; o__[Saprospirales]; f__Chitinophagaceae; g__Flavisolibacter; s__unidentified_Flavisolibacter
ASV_8015	3.0	0.0	0.0	0.0	1.0	0.0	d__Bacteria; p__Proteobacteria; c__Gammaproteobacteria; o__Aeromonadales; f__Aeromonadaceae; g__unclassified_Aeromonadaceae; s__unclassified_Aeromonadaceae
ASV_2404	3.0	0.0	0.0	0.0	0.0	0.0	d__Bacteria; p__Proteobacteria; c__Deltaproteobacteria; o__Desulfovibrionales; f__Desulfovibrionaceae; g__Desulfovibrio; s__Desulfovibrio_C21_c20
ASV_14402	0.0	0.0	7.0	0.0	0.0	0.0	d__Bacteria; p__Proteobacteria; c__Gammaproteobacteria; o__Enterobacteriales; f__Enterobacteriaceae; g__Hafnia; s__Hafnia_alvei
ASV_14542	84.0	39.0	14.0	0.0	0.0	0.0	d__Bacteria; p__Firmicutes; c__Clostridia; o__Clostridiales; f__unidentified_Clostridiales; g__unidentified_Clostridiales; s__unidentified_Clostridiales
ASV_22453	0.0	0.0	3.0	0.0	0.0	0.0	d__Bacteria; p__Proteobacteria; c__Epsilonproteobacteria; o__Campylobacterales; f__Helicobacteraceae; g__unclassified_Helicobacteraceae; s__unclassified_Helicobacteraceae
ASV_21302	56.0	123.0	70.0	196.0	76.0	115.0	d__Bacteria; p__Firmicutes; c__Bacilli; o__Lactobacillales; f__Lactobacillaceae; g__Lactobacillus; s__Lactobacillus_vaginalis
ASV_8551	0.0	0.0	0.0	0.0	1.0	2.0	d__Bacteria; p__Proteobacteria; c__Gammaproteobacteria; o__Enterobacteriales; f__Enterobacteriaceae; g__unclassified_Enterobacteriaceae; s__unclassified_Enterobacteriaceae
ASV_23089	0.0	0.0	0.0	5.0	0.0	0.0	d__Bacteria; p__Proteobacteria; c__Betaproteobacteria; o__Burkholderiales; f__Comamonadaceae; g__unclassified_Comamonadaceae; s__unclassified_Comamonadaceae
ASV_12963	0.0	0.0	0.0	4.0	0.0	0.0	d__Bacteria; p__Firmicutes; c__Bacilli; o__Gemellales; f__Gemellaceae; g__unclassified_Gemellaceae; s__unclassified_Gemellaceae
ASV_12042	0.0	0.0	0.0	2.0	0.0	0.0	d__Bacteria; p__Bacteroidetes; c__Bacteroidia; o__Bacteroidales; f__Rikenellaceae; g__Alistipes; s__unclassified_Alistipes
ASV_23072	0.0	0.0	0.0	0.0	5.0	0.0	d__Bacteria; p__Firmicutes; c__Clostridia; o__Clostridiales; f__unidentified_Clostridiales; g__unidentified_Clostridiales; s__unidentified_Clostridiales
ASV_2309	0.0	0.0	0.0	0.0	4.0	0.0	d__Bacteria; p__Bacteroidetes; c__Bacteroidia; o__Bacteroidales; f__Bacteroidaceae; g__Bacteroides; s__Bacteroides_acidifaciens
ASV_4505	0.0	0.0	0.0	0.0	0.0	29.0	d__Bacteria; p__Firmicutes; c__Clostridia; o__Clostridiales; f__Ruminococcaceae; g__unidentified_Ruminococcaceae; s__unidentified_Ruminococcaceae
ASV_18891	0.0	0.0	0.0	31.0	0.0	0.0	d__Bacteria; p__Actinobacteria; c__Actinobacteria; o__Actinomycetales; f__Cellulomonadaceae; g__Cellulomonas; s__unidentified_Cellulomonas
ASV_19039	4.0	0.0	0.0	0.0	0.0	0.0	d__Bacteria; p__Bacteroidetes; c__Bacteroidia; o__Bacteroidales; f__S24-7; g__unidentified_S24-7; s__unidentified_S24-7
ASV_9641	5.0	0.0	0.0	0.0	0.0	0.0	d__Bacteria; p__Actinobacteria; c__Thermoleophilia; o__Solirubrobacterales; f__unidentified_Solirubrobacterales; g__unidentified_Solirubrobacterales; s__unidentified_Solirubrobacterales
ASV_2590	2.0	0.0	0.0	0.0	0.0	2.0	d__Bacteria; p__Firmicutes; c__Bacilli; o__Lactobacillales; f__Streptococcaceae; g__Streptococcus; s__unidentified_Streptococcus
ASV_3814	3.0	0.0	0.0	0.0	0.0	0.0	d__Bacteria; p__Proteobacteria; c__Gammaproteobacteria; o__Aeromonadales; f__Aeromonadaceae; g__unclassified_Aeromonadaceae; s__unclassified_Aeromonadaceae
ASV_25751	1.0	0.0	0.0	0.0	0.0	0.0	d__Bacteria; p__Firmicutes; c__Bacilli; o__Lactobacillales; f__Lactobacillaceae; g__Lactobacillus; s__unidentified_Lactobacillus
ASV_8875	0.0	6.0	0.0	0.0	0.0	0.0	d__Bacteria; p__Proteobacteria; c__Gammaproteobacteria; o__Alteromonadales; f__Shewanellaceae; g__Shewanella; s__unclassified_Shewanella
ASV_14418	13.0	42.0	0.0	42.0	1.0	0.0	d__Bacteria; p__Actinobacteria; c__Actinobacteria; o__Bifidobacteriales; f__Bifidobacteriaceae; g__Bifidobacterium; s__Bifidobacterium_pseudolongum
ASV_12184	0.0	2.0	0.0	1.0	0.0	0.0	d__Bacteria; p__Proteobacteria; c__Gammaproteobacteria; o__Pseudomonadales; f__Pseudomonadaceae; g__Pseudomonas; s__unclassified_Pseudomonas
ASV_783	0.0	0.0	2.0	0.0	0.0	0.0	d__Bacteria; p__Proteobacteria; c__Gammaproteobacteria; o__Enterobacteriales; f__Enterobacteriaceae; g__Pseudomonas; s__Pseudomonas_syringae
ASV_20057	0.0	0.0	6.0	0.0	0.0	0.0	d__Bacteria; p__Bacteroidetes; c__Bacteroidia; o__Bacteroidales; f__[Paraprevotellaceae]; g__[Prevotella]; s__unidentified_[Prevotella]
ASV_25363	0.0	0.0	0.0	0.0	0.0	1.0	d__Bacteria; p__Proteobacteria; c__Gammaproteobacteria; o__Enterobacteriales; f__Enterobacteriaceae; g__Pseudomonas; s__Pseudomonas_syringae
ASV_3688	0.0	0.0	0.0	0.0	1.0	1.0	d__Bacteria; p__Proteobacteria; c__Gammaproteobacteria; o__Enterobacteriales; f__Enterobacteriaceae; g__Pseudomonas; s__Pseudomonas_syringae
ASV_10671	93.0	46.0	111.0	13.0	0.0	33.0	d__Bacteria; p__Bacteroidetes; c__Bacteroidia; o__Bacteroidales; f__S24-7; g__unidentified_S24-7; s__unidentified_S24-7
ASV_25163	0.0	0.0	0.0	2.0	0.0	0.0	d__Bacteria; p__Proteobacteria; c__Epsilonproteobacteria; o__Campylobacterales; f__Helicobacteraceae; g__Helicobacter; s__unclassified_Helicobacter
ASV_13509	80.0	105.0	14.0	9.0	14.0	27.0	d__Bacteria; p__Bacteroidetes; c__Bacteroidia; o__Bacteroidales; f__S24-7; g__unidentified_S24-7; s__unidentified_S24-7
ASV_4130	0.0	0.0	0.0	0.0	0.0	2.0	d__Bacteria; p__Bacteroidetes; c__Bacteroidia; o__Bacteroidales; f__Prevotellaceae; g__Prevotella; s__Prevotella_melaninogenica
ASV_23438	0.0	0.0	0.0	0.0	0.0	3.0	d__Bacteria; p__Firmicutes; c__Bacilli; o__Lactobacillales; f__Lactobacillaceae; g__Lactobacillus; s__unidentified_Lactobacillus
ASV_21368	4.0	0.0	0.0	0.0	0.0	0.0	d__Bacteria; p__Proteobacteria; c__Betaproteobacteria; o__Burkholderiales; f__Comamonadaceae; g__unclassified_Comamonadaceae; s__unclassified_Comamonadaceae
ASV_21412	3.0	0.0	0.0	0.0	0.0	0.0	d__Bacteria; p__Proteobacteria; c__Betaproteobacteria; o__Burkholderiales; f__Comamonadaceae; g__Methylibium; s__unclassified_Methylibium
ASV_13792	1.0	0.0	0.0	0.0	0.0	0.0	d__Bacteria; p__Bacteroidetes; c__Bacteroidia; o__Bacteroidales; f__S24-7; g__unidentified_S24-7; s__unidentified_S24-7
ASV_941	2.0	0.0	0.0	0.0	0.0	0.0	d__Bacteria; p__Bacteroidetes; c__Bacteroidia; o__Bacteroidales; f__S24-7; g__unidentified_S24-7; s__unidentified_S24-7
ASV_10568	0.0	5.0	0.0	16.0	111.0	43.0	d__Bacteria; p__Proteobacteria; c__Gammaproteobacteria; o__Pseudomonadales; f__Moraxellaceae; g__Acinetobacter; s__unidentified_Acinetobacter
ASV_13470	0.0	3.0	0.0	0.0	0.0	0.0	d__Bacteria; p__Acidobacteria; c__iii1-8; o__DS-18; f__unidentified_DS-18; g__unidentified_DS-18; s__unidentified_DS-18
ASV_10330	0.0	3.0	0.0	0.0	0.0	0.0	d__Bacteria; p__Bacteroidetes; c__Bacteroidia; o__Bacteroidales; f__S24-7; g__unidentified_S24-7; s__unidentified_S24-7
ASV_9033	0.0	0.0	5.0	0.0	0.0	0.0	d__Bacteria; p__Firmicutes; c__Clostridia; o__Clostridiales; f__Veillonellaceae; g__Acidaminococcus; s__unidentified_Acidaminococcus
ASV_18572	0.0	0.0	5.0	0.0	0.0	0.0	d__Bacteria; p__Firmicutes; c__Clostridia; o__Clostridiales; f__Clostridiaceae; g__Clostridium; s__Clostridium_colicanis
ASV_14543	0.0	0.0	5.0	0.0	0.0	0.0	d__Bacteria; p__Proteobacteria; c__Betaproteobacteria; o__Neisseriales; f__Neisseriaceae; g__Neisseria; s__unclassified_Neisseria
ASV_570	0.0	0.0	3.0	1.0	0.0	0.0	d__Bacteria; p__Firmicutes; c__Bacilli; o__Lactobacillales; f__Lactobacillaceae; g__Lactobacillus; s__unidentified_Lactobacillus
ASV_8279	0.0	0.0	2.0	0.0	0.0	0.0	d__Bacteria; p__Proteobacteria; c__Gammaproteobacteria; o__unclassified_Gammaproteobacteria; f__unclassified_Gammaproteobacteria; g__unclassified_Gammaproteobacteria; s__unclassified_Gammaproteobacteria
ASV_4458	0.0	0.0	0.0	0.0	0.0	2.0	d__Bacteria; p__Proteobacteria; c__Gammaproteobacteria; o__Enterobacteriales; f__Enterobacteriaceae; g__unclassified_Enterobacteriaceae; s__unclassified_Enterobacteriaceae
ASV_22095	0.0	0.0	54.0	0.0	0.0	0.0	d__Bacteria; p__Cyanobacteria; c__Chloroplast; o__Streptophyta; f__unidentified_Streptophyta; g__unidentified_Streptophyta; s__unidentified_Streptophyta
ASV_8035	0.0	0.0	0.0	2.0	10.0	0.0	d__Bacteria; p__Proteobacteria; c__Gammaproteobacteria; o__Aeromonadales; f__Aeromonadaceae; g__Aeromonas; s__unclassified_Aeromonas
ASV_21097	0.0	0.0	0.0	3.0	0.0	0.0	d__Bacteria; p__Proteobacteria; c__Gammaproteobacteria; o__Aeromonadales; f__Aeromonadaceae; g__Aeromonas; s__unclassified_Aeromonas
ASV_6104	0.0	0.0	0.0	3.0	0.0	0.0	d__Bacteria; p__Proteobacteria; c__Betaproteobacteria; o__Burkholderiales; f__Comamonadaceae; g__unclassified_Comamonadaceae; s__unclassified_Comamonadaceae
ASV_20332	0.0	0.0	0.0	1.0	0.0	0.0	d__Bacteria; p__Proteobacteria; c__Gammaproteobacteria; o__Enterobacteriales; f__Enterobacteriaceae; g__unclassified_Enterobacteriaceae; s__unclassified_Enterobacteriaceae
ASV_4490	0.0	5.0	8.0	15.0	2.0	0.0	d__Bacteria; p__Actinobacteria; c__Coriobacteriia; o__Coriobacteriales; f__Coriobacteriaceae; g__Adlercreutzia; s__unidentified_Adlercreutzia
ASV_19386	0.0	0.0	0.0	0.0	1.0	0.0	d__Bacteria; p__Bacteroidetes; c__Bacteroidia; o__Bacteroidales; f__S24-7; g__unidentified_S24-7; s__unidentified_S24-7
ASV_6445	0.0	0.0	0.0	0.0	2.0	0.0	d__Bacteria; p__Firmicutes; c__Clostridia; o__Clostridiales; f__Veillonellaceae; g__Veillonella; s__Veillonella_parvula
ASV_15664	0.0	0.0	0.0	0.0	1.0	0.0	d__Bacteria; p__Bacteroidetes; c__Bacteroidia; o__Bacteroidales; f__Prevotellaceae; g__Prevotella; s__unidentified_Prevotella
ASV_6568	0.0	0.0	0.0	0.0	0.0	4.0	d__Bacteria; p__Firmicutes; c__Bacilli; o__Lactobacillales; f__Streptococcaceae; g__Lactococcus; s__unidentified_Lactococcus
ASV_18639	0.0	0.0	0.0	0.0	0.0	6.0	d__Bacteria; p__Actinobacteria; c__Actinobacteria; o__Actinomycetales; f__Nocardiaceae; g__Rhodococcus; s__unidentified_Rhodococcus
ASV_3503	0.0	0.0	0.0	0.0	0.0	3.0	d__Bacteria; p__Firmicutes; c__Clostridia; o__Clostridiales; f__Christensenellaceae; g__unidentified_Christensenellaceae; s__unidentified_Christensenellaceae
ASV_4421	0.0	0.0	0.0	0.0	0.0	3.0	d__Bacteria; p__Bacteroidetes; c__Bacteroidia; o__Bacteroidales; f__S24-7; g__unidentified_S24-7; s__unidentified_S24-7
ASV_6286	3.0	0.0	0.0	0.0	0.0	0.0	d__Bacteria; p__Firmicutes; c__Clostridia; o__Clostridiales; f__unidentified_Clostridiales; g__unidentified_Clostridiales; s__unidentified_Clostridiales
ASV_6715	2.0	0.0	0.0	0.0	0.0	0.0	d__Bacteria; p__Firmicutes; c__Bacilli; o__Bacillales; f__Bacillaceae; g__unclassified_Bacillaceae; s__unclassified_Bacillaceae
ASV_4609	3.0	0.0	0.0	0.0	0.0	0.0	d__Bacteria; p__Proteobacteria; c__Gammaproteobacteria; o__Enterobacteriales; f__Enterobacteriaceae; g__Pseudomonas; s__Pseudomonas_syringae
ASV_9382	0.0	3.0	0.0	0.0	0.0	0.0	d__Bacteria; p__Firmicutes; c__Bacilli; o__Lactobacillales; f__unidentified_Lactobacillales; g__unidentified_Lactobacillales; s__unidentified_Lactobacillales
ASV_14198	21.0	17.0	25.0	0.0	0.0	0.0	d__Bacteria; p__Firmicutes; c__Clostridia; o__Clostridiales; f__Ruminococcaceae; g__Oscillospira; s__unidentified_Oscillospira
ASV_4902	0.0	4.0	0.0	0.0	0.0	0.0	d__Bacteria; p__Bacteroidetes; c__Bacteroidia; o__Bacteroidales; f__S24-7; g__unidentified_S24-7; s__unidentified_S24-7
ASV_24092	0.0	2.0	2.0	0.0	0.0	0.0	d__Bacteria; p__Firmicutes; c__Bacilli; o__Lactobacillales; f__Lactobacillaceae; g__Lactobacillus; s__unidentified_Lactobacillus
ASV_24133	0.0	0.0	4.0	0.0	0.0	0.0	d__Bacteria; p__Bacteroidetes; c__Bacteroidia; o__Bacteroidales; f__[Paraprevotellaceae]; g__Paraprevotella; s__unidentified_Paraprevotella
ASV_22043	0.0	0.0	3.0	0.0	0.0	0.0	d__Bacteria; p__Proteobacteria; c__Gammaproteobacteria; o__Enterobacteriales; f__Enterobacteriaceae; g__Pseudomonas; s__Pseudomonas_syringae
ASV_17633	0.0	0.0	2.0	0.0	0.0	0.0	d__Bacteria; p__Proteobacteria; c__Gammaproteobacteria; o__Pseudomonadales; f__Pseudomonadaceae; g__Pseudomonas; s__unidentified_Pseudomonas
ASV_3138	36.0	23.0	16.0	40.0	6.0	25.0	d__Bacteria; p__Bacteroidetes; c__Bacteroidia; o__Bacteroidales; f__Bacteroidaceae; g__Bacteroides; s__Bacteroides_acidifaciens
ASV_4972	0.0	0.0	0.0	2.0	0.0	0.0	d__Bacteria; p__Proteobacteria; c__Gammaproteobacteria; o__Enterobacteriales; f__Enterobacteriaceae; g__Pseudomonas; s__Pseudomonas_syringae
ASV_11143	47.0	20.0	6.0	0.0	0.0	9.0	d__Bacteria; p__Proteobacteria; c__Gammaproteobacteria; o__Pseudomonadales; f__Pseudomonadaceae; g__Pseudomonas; s__Pseudomonas_stutzeri
ASV_15193	0.0	0.0	0.0	0.0	2.0	0.0	d__Bacteria; p__Proteobacteria; c__Gammaproteobacteria; o__Alteromonadales; f__Shewanellaceae; g__Shewanella; s__unidentified_Shewanella
ASV_14915	0.0	0.0	0.0	2.0	0.0	0.0	d__Bacteria; p__Bacteroidetes; c__Bacteroidia; o__Bacteroidales; f__S24-7; g__unidentified_S24-7; s__unidentified_S24-7
ASV_16587	0.0	0.0	0.0	1.0	0.0	0.0	d__Bacteria; p__Proteobacteria; c__Gammaproteobacteria; o__Aeromonadales; f__Aeromonadaceae; g__Aeromonas; s__unclassified_Aeromonas
ASV_7735	0.0	0.0	0.0	3.0	0.0	0.0	d__Bacteria; p__Proteobacteria; c__Betaproteobacteria; o__Burkholderiales; f__Comamonadaceae; g__unclassified_Comamonadaceae; s__unclassified_Comamonadaceae
ASV_21036	0.0	0.0	0.0	4.0	0.0	0.0	d__Bacteria; p__Proteobacteria; c__Gammaproteobacteria; o__Enterobacteriales; f__Enterobacteriaceae; g__unclassified_Enterobacteriaceae; s__unclassified_Enterobacteriaceae
ASV_2433	0.0	0.0	0.0	3.0	0.0	0.0	d__Bacteria; p__Bacteroidetes; c__Flavobacteriia; o__Flavobacteriales; f__Flavobacteriaceae; g__Capnocytophaga; s__unidentified_Capnocytophaga
ASV_9774	0.0	0.0	0.0	1.0	0.0	0.0	d__Bacteria; p__Firmicutes; c__Clostridia; o__Clostridiales; f__Veillonellaceae; g__Acidaminococcus; s__unidentified_Acidaminococcus
ASV_15133	0.0	0.0	0.0	2.0	0.0	0.0	d__Bacteria; p__Firmicutes; c__Clostridia; o__Clostridiales; f__Ruminococcaceae; g__Oscillospira; s__unidentified_Oscillospira
ASV_168	0.0	0.0	0.0	2.0	0.0	0.0	d__Bacteria; p__Proteobacteria; c__Gammaproteobacteria; o__Enterobacteriales; f__Enterobacteriaceae; g__unclassified_Enterobacteriaceae; s__unclassified_Enterobacteriaceae
ASV_21569	0.0	0.0	0.0	0.0	1.0	1.0	d__Bacteria; p__Firmicutes; c__Clostridia; o__Clostridiales; f__Peptostreptococcaceae; g__Clostridium; s__Clostridium_ruminantium
ASV_14452	0.0	0.0	0.0	0.0	0.0	2.0	d__Bacteria; p__Proteobacteria; c__Betaproteobacteria; o__Burkholderiales; f__Comamonadaceae; g__unclassified_Comamonadaceae; s__unclassified_Comamonadaceae
ASV_16380	0.0	0.0	0.0	0.0	1.0	3.0	d__Bacteria; p__Proteobacteria; c__Gammaproteobacteria; o__Alteromonadales; f__Alteromonadaceae; g__Cellvibrio; s__unidentified_Cellvibrio
ASV_5689	0.0	0.0	0.0	0.0	0.0	3.0	d__Bacteria; p__Proteobacteria; c__Gammaproteobacteria; o__Pseudomonadales; f__Pseudomonadaceae; g__Pseudomonas; s__unidentified_Pseudomonas
ASV_9471	160.0	2351.0	207.0	1004.0	9.0	166.0	d__Bacteria; p__Firmicutes; c__Bacilli; o__Turicibacterales; f__Turicibacteraceae; g__Turicibacter; s__unidentified_Turicibacter
ASV_19187	2.0	0.0	0.0	0.0	0.0	0.0	d__Bacteria; p__Proteobacteria; c__Betaproteobacteria; o__Burkholderiales; f__Comamonadaceae; g__unclassified_Comamonadaceae; s__unclassified_Comamonadaceae
ASV_14185	2.0	0.0	0.0	0.0	0.0	0.0	d__Bacteria; p__Proteobacteria; c__Betaproteobacteria; o__Neisseriales; f__Neisseriaceae; g__unclassified_Neisseriaceae; s__unclassified_Neisseriaceae
ASV_2093	2.0	0.0	0.0	0.0	0.0	0.0	d__Bacteria; p__Actinobacteria; c__Actinobacteria; o__Actinomycetales; f__Micrococcaceae; g__Arthrobacter; s__Arthrobacter_crystallopoietes
ASV_3526	2.0	0.0	0.0	0.0	0.0	0.0	d__Bacteria; p__Bacteroidetes; c__Flavobacteriia; o__Flavobacteriales; f__[Weeksellaceae]; g__Chryseobacterium; s__unidentified_Chryseobacterium
ASV_14267	3.0	0.0	0.0	0.0	0.0	0.0	d__Bacteria; p__Firmicutes; c__Clostridia; o__Clostridiales; f__Clostridiaceae; g__Candidatus_Arthromitus; s__unidentified_Candidatus_Arthromitus
ASV_15206	0.0	3.0	0.0	0.0	0.0	0.0	d__Bacteria; p__Firmicutes; c__Clostridia; o__Clostridiales; f__unidentified_Clostridiales; g__unidentified_Clostridiales; s__unidentified_Clostridiales
ASV_7837	0.0	1.0	0.0	0.0	0.0	0.0	d__Bacteria; p__Proteobacteria; c__Gammaproteobacteria; o__Enterobacteriales; f__Enterobacteriaceae; g__unclassified_Enterobacteriaceae; s__unclassified_Enterobacteriaceae
ASV_11638	0.0	3.0	0.0	0.0	0.0	0.0	d__Bacteria; p__Firmicutes; c__Bacilli; o__Lactobacillales; f__unidentified_Lactobacillales; g__unidentified_Lactobacillales; s__unidentified_Lactobacillales
ASV_20699	0.0	3.0	0.0	0.0	0.0	0.0	d__Bacteria; p__Firmicutes; c__Bacilli; o__Lactobacillales; f__unclassified_Lactobacillales; g__unclassified_Lactobacillales; s__unclassified_Lactobacillales
ASV_18629	0.0	3.0	0.0	0.0	0.0	0.0	d__Bacteria; p__Firmicutes; c__Clostridia; o__Clostridiales; f__Ruminococcaceae; g__unidentified_Ruminococcaceae; s__unidentified_Ruminococcaceae
ASV_16622	0.0	2.0	0.0	0.0	0.0	0.0	d__Bacteria; p__Firmicutes; c__Clostridia; o__Clostridiales; f__Ruminococcaceae; g__unidentified_Ruminococcaceae; s__unidentified_Ruminococcaceae
ASV_21769	0.0	1.0	0.0	0.0	0.0	0.0	d__Bacteria; p__Proteobacteria; c__Gammaproteobacteria; o__Aeromonadales; f__Aeromonadaceae; g__Aeromonas; s__unclassified_Aeromonas
ASV_21135	0.0	2.0	0.0	0.0	0.0	0.0	d__Bacteria; p__Proteobacteria; c__Gammaproteobacteria; o__Enterobacteriales; f__Enterobacteriaceae; g__Pseudomonas; s__Pseudomonas_syringae
ASV_19295	0.0	1.0	0.0	0.0	1.0	0.0	d__Bacteria; p__Actinobacteria; c__Actinobacteria; o__Actinomycetales; f__Nocardiaceae; g__Rhodococcus; s__unidentified_Rhodococcus
ASV_8072	0.0	0.0	3.0	0.0	0.0	0.0	d__Bacteria; p__Proteobacteria; c__Betaproteobacteria; o__Methylophilales; f__Methylophilaceae; g__Methylotenera; s__Methylotenera_versatilis
ASV_13685	0.0	0.0	3.0	0.0	0.0	0.0	d__Bacteria; p__Bacteroidetes; c__Bacteroidia; o__Bacteroidales; f__S24-7; g__unidentified_S24-7; s__unidentified_S24-7
ASV_10144	0.0	0.0	3.0	0.0	0.0	0.0	d__Bacteria; p__Firmicutes; c__Bacilli; o__Lactobacillales; f__Lactobacillaceae; g__Lactobacillus; s__unidentified_Lactobacillus
ASV_17040	0.0	0.0	3.0	0.0	0.0	0.0	d__Bacteria; p__Bacteroidetes; c__Bacteroidia; o__Bacteroidales; f__S24-7; g__unidentified_S24-7; s__unidentified_S24-7
ASV_20568	0.0	0.0	3.0	0.0	0.0	0.0	d__Bacteria; p__Proteobacteria; c__Betaproteobacteria; o__Burkholderiales; f__Comamonadaceae; g__unclassified_Comamonadaceae; s__unclassified_Comamonadaceae
ASV_6851	0.0	0.0	3.0	0.0	0.0	0.0	d__Bacteria; p__Firmicutes; c__Bacilli; o__Lactobacillales; f__Lactobacillaceae; g__Lactobacillus; s__unidentified_Lactobacillus
ASV_13245	0.0	0.0	2.0	0.0	0.0	0.0	d__Bacteria; p__Proteobacteria; c__Betaproteobacteria; o__Neisseriales; f__Neisseriaceae; g__Neisseria; s__unclassified_Neisseria
ASV_21693	0.0	0.0	0.0	1.0	0.0	0.0	d__Bacteria; p__Bacteroidetes; c__Bacteroidia; o__Bacteroidales; f__S24-7; g__unidentified_S24-7; s__unidentified_S24-7
ASV_18810	0.0	0.0	0.0	2.0	0.0	0.0	d__Bacteria; p__Proteobacteria; c__Gammaproteobacteria; o__Alteromonadales; f__Alteromonadaceae; g__Cellvibrio; s__unidentified_Cellvibrio
ASV_6008	0.0	0.0	0.0	1.0	0.0	0.0	d__Bacteria; p__Bacteroidetes; c__Flavobacteriia; o__Flavobacteriales; f__Flavobacteriaceae; g__Capnocytophaga; s__unidentified_Capnocytophaga
ASV_9064	0.0	0.0	0.0	3.0	0.0	0.0	d__Bacteria; p__Actinobacteria; c__Actinobacteria; o__Actinomycetales; f__Micrococcaceae; g__Rothia; s__unidentified_Rothia
ASV_22779	0.0	0.0	0.0	2.0	0.0	0.0	d__Bacteria; p__Bacteroidetes; c__Bacteroidia; o__Bacteroidales; f__S24-7; g__unidentified_S24-7; s__unidentified_S24-7
ASV_21618	0.0	0.0	0.0	0.0	0.0	1.0	d__Bacteria; p__Proteobacteria; c__Gammaproteobacteria; o__Enterobacteriales; f__Enterobacteriaceae; g__unclassified_Enterobacteriaceae; s__unclassified_Enterobacteriaceae
ASV_1908	0.0	0.0	0.0	0.0	3.0	0.0	d__Bacteria; p__Firmicutes; c__Erysipelotrichi; o__Erysipelotrichales; f__Erysipelotrichaceae; g__Clostridium; s__Clostridium_ramosum
ASV_14888	0.0	0.0	0.0	0.0	0.0	3.0	d__Bacteria; p__Firmicutes; c__Clostridia; o__Clostridiales; f__Veillonellaceae; g__Veillonella; s__Veillonella_dispar
ASV_8595	0.0	0.0	0.0	0.0	0.0	3.0	d__Bacteria; p__Firmicutes; c__Erysipelotrichi; o__Erysipelotrichales; f__Erysipelotrichaceae; g__p-75-a5; s__unidentified_p-75-a5
ASV_22570	0.0	0.0	0.0	0.0	0.0	2.0	d__Bacteria; p__Bacteroidetes; c__Bacteroidia; o__Bacteroidales; f__Porphyromonadaceae; g__Parabacteroides; s__unidentified_Parabacteroides
ASV_14964	2.0	0.0	0.0	0.0	0.0	0.0	d__Bacteria; p__Proteobacteria; c__Betaproteobacteria; o__Neisseriales; f__Neisseriaceae; g__Neisseria; s__unclassified_Neisseria
ASV_10471	1.0	0.0	0.0	0.0	0.0	0.0	d__Bacteria; p__Proteobacteria; c__Epsilonproteobacteria; o__Campylobacterales; f__Campylobacteraceae; g__Sulfurospirillum; s__unidentified_Sulfurospirillum
ASV_23694	1.0	0.0	0.0	0.0	0.0	0.0	d__Bacteria; p__Bacteroidetes; c__Bacteroidia; o__Bacteroidales; f__S24-7; g__unidentified_S24-7; s__unidentified_S24-7
ASV_18590	1.0	0.0	0.0	0.0	0.0	0.0	d__Bacteria; p__Bacteroidetes; c__Bacteroidia; o__Bacteroidales; f__S24-7; g__unidentified_S24-7; s__unidentified_S24-7
ASV_26461	2.0	0.0	0.0	0.0	0.0	0.0	d__Bacteria; p__Bacteroidetes; c__Bacteroidia; o__Bacteroidales; f__S24-7; g__unidentified_S24-7; s__unidentified_S24-7
ASV_21272	1.0	0.0	0.0	0.0	0.0	0.0	d__Bacteria; p__unclassified_Bacteria; c__unclassified_Bacteria; o__unclassified_Bacteria; f__unclassified_Bacteria; g__unclassified_Bacteria; s__unclassified_Bacteria
ASV_26026	0.0	2.0	0.0	0.0	0.0	0.0	d__Bacteria; p__Bacteroidetes; c__Bacteroidia; o__Bacteroidales; f__Porphyromonadaceae; g__Parabacteroides; s__Parabacteroides_distasonis
ASV_8945	0.0	2.0	0.0	0.0	0.0	0.0	d__Bacteria; p__Bacteroidetes; c__Bacteroidia; o__Bacteroidales; f__Bacteroidaceae; g__Bacteroides; s__unidentified_Bacteroides
ASV_20931	0.0	1.0	0.0	0.0	0.0	0.0	d__Bacteria; p__Proteobacteria; c__Gammaproteobacteria; o__unclassified_Gammaproteobacteria; f__unclassified_Gammaproteobacteria; g__unclassified_Gammaproteobacteria; s__unclassified_Gammaproteobacteria
ASV_2327	0.0	2.0	0.0	0.0	0.0	0.0	d__Bacteria; p__Bacteroidetes; c__Bacteroidia; o__Bacteroidales; f__Bacteroidaceae; g__Bacteroides; s__unidentified_Bacteroides
ASV_11825	0.0	2.0	0.0	0.0	0.0	0.0	d__Bacteria; p__Bacteroidetes; c__Bacteroidia; o__Bacteroidales; f__S24-7; g__unidentified_S24-7; s__unidentified_S24-7
ASV_23783	0.0	1.0	0.0	0.0	0.0	0.0	d__Bacteria; p__Bacteroidetes; c__[Saprospirae]; o__[Saprospirales]; f__Saprospiraceae; g__Haliscomenobacter; s__unidentified_Haliscomenobacter
ASV_16188	0.0	1.0	0.0	0.0	0.0	0.0	d__Bacteria; p__Proteobacteria; c__Alphaproteobacteria; o__Caulobacterales; f__Caulobacteraceae; g__Asticcacaulis; s__unidentified_Asticcacaulis
ASV_25368	0.0	1.0	0.0	0.0	0.0	0.0	d__Bacteria; p__Firmicutes; c__Bacilli; o__Lactobacillales; f__Enterococcaceae; g__unclassified_Enterococcaceae; s__unclassified_Enterococcaceae
ASV_5634	0.0	2.0	0.0	0.0	0.0	0.0	d__Bacteria; p__Actinobacteria; c__Coriobacteriia; o__Coriobacteriales; f__Coriobacteriaceae; g__Collinsella; s__Collinsella_aerofaciens
ASV_1027	0.0	2.0	0.0	0.0	0.0	0.0	d__Bacteria; p__Bacteroidetes; c__Bacteroidia; o__Bacteroidales; f__[Paraprevotellaceae]; g__unidentified_[Paraprevotellaceae]; s__unidentified_[Paraprevotellaceae]
ASV_20243	0.0	2.0	0.0	0.0	0.0	0.0	d__Bacteria; p__Bacteroidetes; c__Bacteroidia; o__Bacteroidales; f__Bacteroidaceae; g__Bacteroides; s__unidentified_Bacteroides
ASV_20572	0.0	0.0	1.0	0.0	0.0	0.0	d__Bacteria; p__Bacteroidetes; c__Bacteroidia; o__Bacteroidales; f__S24-7; g__unidentified_S24-7; s__unidentified_S24-7
ASV_22877	0.0	0.0	2.0	0.0	0.0	0.0	d__Bacteria; p__Bacteroidetes; c__Bacteroidia; o__Bacteroidales; f__Bacteroidaceae; g__Bacteroides; s__unidentified_Bacteroides
ASV_7341	0.0	0.0	2.0	0.0	0.0	0.0	d__Bacteria; p__Proteobacteria; c__Betaproteobacteria; o__Methylophilales; f__Methylophilaceae; g__Methylotenera; s__Methylotenera_versatilis
ASV_7808	0.0	0.0	2.0	0.0	0.0	0.0	d__Bacteria; p__Proteobacteria; c__Alphaproteobacteria; o__Rhodospirillales; f__unidentified_Rhodospirillales; g__unidentified_Rhodospirillales; s__unidentified_Rhodospirillales
ASV_11419	0.0	0.0	2.0	0.0	0.0	0.0	d__Bacteria; p__Proteobacteria; c__Gammaproteobacteria; o__Enterobacteriales; f__Enterobacteriaceae; g__Hafnia; s__Hafnia_alvei
ASV_5751	0.0	0.0	2.0	0.0	0.0	10.0	d__Bacteria; p__Bacteroidetes; c__Bacteroidia; o__Bacteroidales; f__[Odoribacteraceae]; g__Odoribacter; s__unidentified_Odoribacter
ASV_22125	0.0	0.0	2.0	0.0	0.0	0.0	d__Bacteria; p__Proteobacteria; c__Alphaproteobacteria; o__Sphingomonadales; f__Sphingomonadaceae; g__Novosphingobium; s__unclassified_Novosphingobium
ASV_8027	50.0	0.0	38.0	0.0	0.0	0.0	d__Bacteria; p__TM7; c__TM7-3; o__CW040; f__F16; g__unidentified_F16; s__unidentified_F16
ASV_16723	0.0	0.0	0.0	1.0	0.0	0.0	d__Bacteria; p__Proteobacteria; c__Gammaproteobacteria; o__Enterobacteriales; f__Enterobacteriaceae; g__Pseudomonas; s__Pseudomonas_syringae
ASV_14604	0.0	0.0	0.0	1.0	0.0	0.0	d__Bacteria; p__Proteobacteria; c__Betaproteobacteria; o__Neisseriales; f__Neisseriaceae; g__Neisseria; s__unclassified_Neisseria
ASV_21026	0.0	0.0	0.0	2.0	0.0	0.0	d__Bacteria; p__Proteobacteria; c__unclassified_Proteobacteria; o__unclassified_Proteobacteria; f__unclassified_Proteobacteria; g__unclassified_Proteobacteria; s__unclassified_Proteobacteria
ASV_16430	3.0	9.0	0.0	0.0	0.0	0.0	d__Bacteria; p__Deferribacteres; c__Deferribacteres; o__Deferribacterales; f__Deferribacteraceae; g__Mucispirillum; s__Mucispirillum_schaedleri
ASV_12597	0.0	0.0	0.0	2.0	0.0	0.0	d__Bacteria; p__Bacteroidetes; c__Bacteroidia; o__Bacteroidales; f__S24-7; g__unidentified_S24-7; s__unidentified_S24-7
ASV_18723	0.0	0.0	0.0	2.0	0.0	0.0	d__Bacteria; p__Bacteroidetes; c__Bacteroidia; o__Bacteroidales; f__S24-7; g__unidentified_S24-7; s__unidentified_S24-7
ASV_13171	0.0	0.0	0.0	2.0	0.0	0.0	d__Bacteria; p__Bacteroidetes; c__Bacteroidia; o__Bacteroidales; f__Bacteroidaceae; g__Bacteroides; s__unidentified_Bacteroides
ASV_8102	0.0	0.0	0.0	1.0	0.0	0.0	d__Bacteria; p__Proteobacteria; c__Gammaproteobacteria; o__Enterobacteriales; f__Enterobacteriaceae; g__unclassified_Enterobacteriaceae; s__unclassified_Enterobacteriaceae
ASV_26453	0.0	0.0	0.0	1.0	0.0	0.0	d__Bacteria; p__Proteobacteria; c__Betaproteobacteria; o__Neisseriales; f__Neisseriaceae; g__unclassified_Neisseriaceae; s__unclassified_Neisseriaceae
ASV_702	0.0	0.0	0.0	1.0	0.0	0.0	d__Bacteria; p__Firmicutes; c__Bacilli; o__Lactobacillales; f__Streptococcaceae; g__Streptococcus; s__unidentified_Streptococcus
ASV_26236	0.0	0.0	0.0	1.0	0.0	0.0	d__Bacteria; p__Proteobacteria; c__Gammaproteobacteria; o__Alteromonadales; f__Shewanellaceae; g__Shewanella; s__unidentified_Shewanella
ASV_13664	0.0	0.0	0.0	1.0	0.0	0.0	d__Bacteria; p__Tenericutes; c__Mollicutes; o__unidentified_Mollicutes; f__unidentified_Mollicutes; g__unidentified_Mollicutes; s__unidentified_Mollicutes
ASV_1159	0.0	0.0	0.0	1.0	0.0	0.0	d__Bacteria; p__Bacteroidetes; c__Bacteroidia; o__Bacteroidales; f__Prevotellaceae; g__Prevotella; s__unidentified_Prevotella
ASV_20207	0.0	0.0	0.0	1.0	0.0	0.0	d__Bacteria; p__Firmicutes; c__Erysipelotrichi; o__Erysipelotrichales; f__Erysipelotrichaceae; g__unidentified_Erysipelotrichaceae; s__unidentified_Erysipelotrichaceae
ASV_308	0.0	0.0	0.0	0.0	1.0	0.0	d__Bacteria; p__Bacteroidetes; c__Flavobacteriia; o__Flavobacteriales; f__[Weeksellaceae]; g__Chryseobacterium; s__unidentified_Chryseobacterium
ASV_1670	0.0	0.0	0.0	0.0	2.0	0.0	d__Bacteria; p__Proteobacteria; c__Gammaproteobacteria; o__Alteromonadales; f__Alteromonadaceae; g__Cellvibrio; s__unidentified_Cellvibrio
ASV_2834	0.0	0.0	0.0	0.0	1.0	0.0	d__Bacteria; p__Proteobacteria; c__Alphaproteobacteria; o__Rhizobiales; f__Bradyrhizobiaceae; g__unclassified_Bradyrhizobiaceae; s__unclassified_Bradyrhizobiaceae
ASV_18636	0.0	0.0	0.0	0.0	2.0	0.0	d__Bacteria; p__Bacteroidetes; c__Bacteroidia; o__Bacteroidales; f__S24-7; g__unidentified_S24-7; s__unidentified_S24-7
ASV_22245	0.0	0.0	0.0	0.0	1.0	0.0	d__Bacteria; p__Bacteroidetes; c__Bacteroidia; o__Bacteroidales; f__Porphyromonadaceae; g__Parabacteroides; s__unidentified_Parabacteroides
ASV_14138	0.0	0.0	0.0	0.0	2.0	0.0	d__Bacteria; p__Bacteroidetes; c__Bacteroidia; o__Bacteroidales; f__S24-7; g__unidentified_S24-7; s__unidentified_S24-7
ASV_14727	0.0	0.0	0.0	0.0	0.0	2.0	d__Bacteria; p__Firmicutes; c__Bacilli; o__Bacillales; f__Bacillaceae; g__unclassified_Bacillaceae; s__unclassified_Bacillaceae
ASV_24998	0.0	0.0	0.0	0.0	0.0	1.0	d__Bacteria; p__Proteobacteria; c__Gammaproteobacteria; o__Enterobacteriales; f__Enterobacteriaceae; g__Pseudomonas; s__Pseudomonas_syringae
ASV_20625	0.0	0.0	0.0	5.0	0.0	0.0	d__Bacteria; p__Bacteroidetes; c__Bacteroidia; o__Bacteroidales; f__Rikenellaceae; g__Alistipes; s__Alistipes_finegoldii
ASV_53	0.0	1.0	0.0	0.0	0.0	0.0	d__Bacteria; p__Proteobacteria; c__Gammaproteobacteria; o__Aeromonadales; f__Aeromonadaceae; g__Aeromonas; s__unclassified_Aeromonas
ASV_10513	482.0	2275.0	1164.0	4599.0	68.0	531.0	d__Bacteria; p__Firmicutes; c__Clostridia; o__Clostridiales; f__Peptostreptococcaceae; g__unidentified_Peptostreptococcaceae; s__unidentified_Peptostreptococcaceae
ASV_3043	51.0	0.0	0.0	275.0	0.0	23.0	d__Bacteria; p__Firmicutes; c__Clostridia; o__Clostridiales; f__unidentified_Clostridiales; g__unidentified_Clostridiales; s__unidentified_Clostridiales
ASV_20513	259.0	17.0	0.0	0.0	0.0	5.0	d__Bacteria; p__Firmicutes; c__Clostridia; o__Clostridiales; f__unidentified_Clostridiales; g__unidentified_Clostridiales; s__unidentified_Clostridiales
ASV_23125	586.0	1387.0	217.0	9.0	56.0	0.0	d__Bacteria; p__Firmicutes; c__Clostridia; o__Clostridiales; f__unidentified_Clostridiales; g__unidentified_Clostridiales; s__unidentified_Clostridiales
ASV_2278	765.0	573.0	2690.0	219.0	7.0	193.0	d__Bacteria; p__Bacteroidetes; c__Bacteroidia; o__Bacteroidales; f__S24-7; g__unidentified_S24-7; s__unidentified_S24-7
ASV_18064	843.0	609.0	2398.0	225.0	17.0	120.0	d__Bacteria; p__Bacteroidetes; c__Bacteroidia; o__Bacteroidales; f__S24-7; g__unidentified_S24-7; s__unidentified_S24-7
ASV_24081	0.0	3552.0	55.0	0.0	0.0	0.0	d__Bacteria; p__Firmicutes; c__Clostridia; o__Clostridiales; f__Ruminococcaceae; g__Ruminococcus; s__Ruminococcus_callidus
ASV_23941	562.0	314.0	420.0	411.0	668.0	382.0	d__Bacteria; p__Proteobacteria; c__Betaproteobacteria; o__Burkholderiales; f__Comamonadaceae; g__Rubrivivax; s__unidentified_Rubrivivax
ASV_6083	1095.0	300.0	433.0	200.0	20.0	62.0	d__Bacteria; p__Bacteroidetes; c__Bacteroidia; o__Bacteroidales; f__S24-7; g__unidentified_S24-7; s__unidentified_S24-7
ASV_22586	0.0	0.0	0.0	3374.0	153.0	62.0	d__Bacteria; p__Firmicutes; c__Clostridia; o__Clostridiales; f__Ruminococcaceae; g__Ruminococcus; s__Ruminococcus_callidus
ASV_8941	636.0	63.0	1441.0	564.0	169.0	526.0	d__Bacteria; p__Firmicutes; c__Bacilli; o__Lactobacillales; f__Lactobacillaceae; g__Lactobacillus; s__unidentified_Lactobacillus
ASV_9345	2050.0	680.0	0.0	55.0	13.0	349.0	d__Bacteria; p__Bacteroidetes; c__Bacteroidia; o__Bacteroidales; f__Prevotellaceae; g__Prevotella; s__unidentified_Prevotella
ASV_17181	3756.0	1115.0	0.0	0.0	0.0	0.0	d__Bacteria; p__Bacteroidetes; c__Bacteroidia; o__Bacteroidales; f__S24-7; g__unidentified_S24-7; s__unidentified_S24-7
ASV_17571	1215.0	167.0	1085.0	10.0	30.0	504.0	d__Bacteria; p__Bacteroidetes; c__Bacteroidia; o__Bacteroidales; f__Bacteroidaceae; g__Bacteroides; s__unidentified_Bacteroides
ASV_13150	59.0	722.0	94.0	264.0	0.0	23.0	d__Bacteria; p__Firmicutes; c__Clostridia; o__Clostridiales; f__Clostridiaceae; g__Clostridium; s__Clostridium_celatum
ASV_11494	30.0	0.0	5311.0	0.0	0.0	0.0	d__Bacteria; p__Proteobacteria; c__Gammaproteobacteria; o__Legionellales; f__unidentified_Legionellales; g__unidentified_Legionellales; s__unidentified_Legionellales
ASV_13448	145.0	71.0	108.0	135.0	304.0	73.0	d__Bacteria; p__Firmicutes; c__Clostridia; o__Clostridiales; f__Ruminococcaceae; g__Ruminococcus; s__unidentified_Ruminococcus
ASV_12230	0.0	0.0	0.0	10.0	3161.0	314.0	d__Bacteria; p__Firmicutes; c__Clostridia; o__Clostridiales; f__unidentified_Clostridiales; g__unidentified_Clostridiales; s__unidentified_Clostridiales
ASV_751	0.0	0.0	281.0	551.0	534.0	568.0	d__Bacteria; p__Firmicutes; c__Clostridia; o__Clostridiales; f__Clostridiaceae; g__Clostridium; s__Clostridium_baratii
ASV_2082	0.0	3.0	0.0	0.0	0.0	21.0	d__Bacteria; p__Firmicutes; c__Clostridia; o__Clostridiales; f__Ruminococcaceae; g__Ruminococcus; s__Ruminococcus_bromii
ASV_18763	0.0	41.0	0.0	720.0	178.0	8.0	d__Bacteria; p__Firmicutes; c__Clostridia; o__Clostridiales; f__Ruminococcaceae; g__unidentified_Ruminococcaceae; s__unidentified_Ruminococcaceae
ASV_17791	956.0	146.0	45.0	78.0	19.0	65.0	d__Bacteria; p__Bacteroidetes; c__Bacteroidia; o__Bacteroidales; f__Bacteroidaceae; g__Bacteroides; s__unidentified_Bacteroides
ASV_3769	274.0	410.0	214.0	23.0	0.0	137.0	d__Bacteria; p__Proteobacteria; c__Alphaproteobacteria; o__Rhizobiales; f__unidentified_Rhizobiales; g__unidentified_Rhizobiales; s__unidentified_Rhizobiales
ASV_16943	1034.0	0.0	669.0	0.0	0.0	0.0	d__Bacteria; p__Actinobacteria; c__Actinobacteria; o__Actinomycetales; f__Microbacteriaceae; g__Clavibacter; s__unidentified_Clavibacter
ASV_23359	0.0	86.0	0.0	9.0	0.0	0.0	d__Bacteria; p__Firmicutes; c__Clostridia; o__Clostridiales; f__Ruminococcaceae; g__unidentified_Ruminococcaceae; s__unidentified_Ruminococcaceae
ASV_26193	632.0	1857.0	1261.0	3.0	0.0	0.0	d__Bacteria; p__Firmicutes; c__Clostridia; o__Clostridiales; f__Ruminococcaceae; g__Ruminococcus; s__Ruminococcus_bromii
ASV_1838	524.0	306.0	113.0	41.0	258.0	30.0	d__Bacteria; p__Firmicutes; c__Clostridia; o__Clostridiales; f__unclassified_Clostridiales; g__unclassified_Clostridiales; s__unclassified_Clostridiales
ASV_12102	3.0	0.0	242.0	311.0	17.0	259.0	d__Bacteria; p__Bacteroidetes; c__Bacteroidia; o__Bacteroidales; f__[Paraprevotellaceae]; g__[Prevotella]; s__unidentified_[Prevotella]
ASV_21677	631.0	23.0	235.0	186.0	87.0	382.0	d__Bacteria; p__Proteobacteria; c__Gammaproteobacteria; o__Enterobacteriales; f__Enterobacteriaceae; g__Shigella; s__unclassified_Shigella
ASV_15051	55.0	92.0	333.0	30.0	406.0	256.0	d__Bacteria; p__Firmicutes; c__Bacilli; o__Lactobacillales; f__Streptococcaceae; g__Streptococcus; s__Streptococcus_alactolyticus
ASV_23755	219.0	125.0	138.0	180.0	282.0	369.0	d__Bacteria; p__Proteobacteria; c__Alphaproteobacteria; o__Rhizobiales; f__Hyphomicrobiaceae; g__unclassified_Hyphomicrobiaceae; s__unclassified_Hyphomicrobiaceae
ASV_10983	26.0	173.0	57.0	322.0	97.0	31.0	d__Bacteria; p__Firmicutes; c__Clostridia; o__Clostridiales; f__Ruminococcaceae; g__unidentified_Ruminococcaceae; s__unidentified_Ruminococcaceae
ASV_20160	0.0	0.0	0.0	0.0	310.0	0.0	d__Bacteria; p__Proteobacteria; c__Gammaproteobacteria; o__Enterobacteriales; f__Enterobacteriaceae; g__Plesiomonas; s__unclassified_Plesiomonas
ASV_23757	56.0	331.0	141.0	403.0	0.0	31.0	d__Bacteria; p__Firmicutes; c__Clostridia; o__Clostridiales; f__Peptostreptococcaceae; g__unidentified_Peptostreptococcaceae; s__unidentified_Peptostreptococcaceae
ASV_14959	0.0	89.0	0.0	499.0	25.0	0.0	d__Bacteria; p__Firmicutes; c__Clostridia; o__Clostridiales; f__unidentified_Clostridiales; g__unidentified_Clostridiales; s__unidentified_Clostridiales
ASV_10435	478.0	531.0	430.0	58.0	27.0	160.0	d__Bacteria; p__Bacteroidetes; c__Bacteroidia; o__Bacteroidales; f__Prevotellaceae; g__Prevotella; s__unidentified_Prevotella
ASV_700	1828.0	498.0	0.0	0.0	0.0	0.0	d__Bacteria; p__Bacteroidetes; c__Bacteroidia; o__Bacteroidales; f__S24-7; g__unidentified_S24-7; s__unidentified_S24-7
ASV_11932	58.0	28.0	210.0	135.0	231.0	0.0	d__Bacteria; p__Proteobacteria; c__Betaproteobacteria; o__Burkholderiales; f__Comamonadaceae; g__Pelomonas; s__unclassified_Pelomonas
ASV_8250	38.0	70.0	0.0	126.0	17.0	0.0	d__Bacteria; p__Firmicutes; c__Clostridia; o__Clostridiales; f__unidentified_Clostridiales; g__unidentified_Clostridiales; s__unidentified_Clostridiales
ASV_2807	419.0	1441.0	732.0	0.0	0.0	0.0	d__Bacteria; p__Firmicutes; c__Clostridia; o__Clostridiales; f__Ruminococcaceae; g__Ruminococcus; s__Ruminococcus_bromii
ASV_23170	273.0	495.0	20.0	120.0	322.0	473.0	d__Bacteria; p__Firmicutes; c__Bacilli; o__Lactobacillales; f__Lactobacillaceae; g__Lactobacillus; s__Lactobacillus_helveticus
ASV_10434	0.0	0.0	0.0	62.0	1627.0	0.0	d__Bacteria; p__Firmicutes; c__Clostridia; o__Clostridiales; f__unidentified_Clostridiales; g__unidentified_Clostridiales; s__unidentified_Clostridiales
ASV_4958	0.0	0.0	0.0	0.0	57.0	0.0	d__Bacteria; p__Proteobacteria; c__Gammaproteobacteria; o__Enterobacteriales; f__Enterobacteriaceae; g__unclassified_Enterobacteriaceae; s__unclassified_Enterobacteriaceae
ASV_4843	1402.0	578.0	0.0	0.0	0.0	0.0	d__Bacteria; p__Bacteroidetes; c__Bacteroidia; o__Bacteroidales; f__S24-7; g__unidentified_S24-7; s__unidentified_S24-7
ASV_24311	338.0	82.0	136.0	62.0	14.0	0.0	d__Bacteria; p__Bacteroidetes; c__Bacteroidia; o__Bacteroidales; f__S24-7; g__unidentified_S24-7; s__unidentified_S24-7
ASV_23272	18.0	21.0	72.0	296.0	243.0	325.0	d__Bacteria; p__Firmicutes; c__Clostridia; o__Clostridiales; f__Clostridiaceae; g__Clostridium; s__Clostridium_butyricum
ASV_7758	71.0	57.0	168.0	367.0	148.0	248.0	d__Bacteria; p__Firmicutes; c__Clostridia; o__Clostridiales; f__Clostridiaceae; g__SMB53; s__unidentified_SMB53
ASV_24644	0.0	0.0	0.0	175.0	1146.0	0.0	d__Bacteria; p__Firmicutes; c__Clostridia; o__Clostridiales; f__unidentified_Clostridiales; g__unidentified_Clostridiales; s__unidentified_Clostridiales
ASV_2264	274.0	758.0	538.0	18.0	47.0	37.0	d__Bacteria; p__Bacteroidetes; c__Bacteroidia; o__Bacteroidales; f__S24-7; g__unidentified_S24-7; s__unidentified_S24-7
ASV_18862	73.0	26.0	0.0	376.0	61.0	69.0	d__Bacteria; p__Firmicutes; c__Clostridia; o__Clostridiales; f__Lachnospiraceae; g__Blautia; s__unidentified_Blautia
ASV_5853	2.0	33.0	0.0	9.0	10.0	1467.0	d__Bacteria; p__[Thermi]; c__Deinococci; o__Thermales; f__Thermaceae; g__Thermus; s__unidentified_Thermus
ASV_18136	0.0	0.0	0.0	218.0	28.0	387.0	d__Bacteria; p__Firmicutes; c__Clostridia; o__Clostridiales; f__Lachnospiraceae; g__Blautia; s__unidentified_Blautia
ASV_1378	72.0	29.0	90.0	283.0	96.0	119.0	d__Bacteria; p__Firmicutes; c__Bacilli; o__Turicibacterales; f__Turicibacteraceae; g__Turicibacter; s__unidentified_Turicibacter
ASV_26233	656.0	279.0	734.0	0.0	3.0	0.0	d__Bacteria; p__Bacteroidetes; c__Bacteroidia; o__Bacteroidales; f__S24-7; g__unidentified_S24-7; s__unidentified_S24-7
ASV_12385	56.0	70.0	31.0	14.0	0.0	0.0	d__Bacteria; p__Firmicutes; c__Clostridia; o__Clostridiales; f__Ruminococcaceae; g__unidentified_Ruminococcaceae; s__unidentified_Ruminococcaceae
ASV_26330	858.0	187.0	13.0	46.0	29.0	15.0	d__Bacteria; p__Bacteroidetes; c__Bacteroidia; o__Bacteroidales; f__Bacteroidaceae; g__Bacteroides; s__unidentified_Bacteroides
ASV_14308	0.0	39.0	0.0	35.0	132.0	15.0	d__Bacteria; p__Firmicutes; c__Clostridia; o__Clostridiales; f__unidentified_Clostridiales; g__unidentified_Clostridiales; s__unidentified_Clostridiales
ASV_20355	0.0	14.0	0.0	140.0	100.0	0.0	d__Bacteria; p__Firmicutes; c__Clostridia; o__Clostridiales; f__unidentified_Clostridiales; g__unidentified_Clostridiales; s__unidentified_Clostridiales
ASV_14480	88.0	18.0	25.0	384.0	122.0	46.0	d__Bacteria; p__Firmicutes; c__Clostridia; o__Clostridiales; f__Lachnospiraceae; g__Roseburia; s__unidentified_Roseburia
ASV_15195	569.0	139.0	281.0	0.0	0.0	133.0	d__Bacteria; p__Bacteroidetes; c__Bacteroidia; o__Bacteroidales; f__Bacteroidaceae; g__Bacteroides; s__unidentified_Bacteroides
ASV_25274	36.0	88.0	114.0	57.0	147.0	165.0	d__Bacteria; p__Firmicutes; c__Clostridia; o__Clostridiales; f__Lachnospiraceae; g__unidentified_Lachnospiraceae; s__unidentified_Lachnospiraceae
ASV_9669	47.0	39.0	92.0	91.0	139.0	45.0	d__Bacteria; p__Proteobacteria; c__Betaproteobacteria; o__Burkholderiales; f__Comamonadaceae; g__Acidovorax; s__unclassified_Acidovorax
ASV_7990	189.0	115.0	236.0	53.0	28.0	32.0	d__Bacteria; p__Firmicutes; c__Clostridia; o__Clostridiales; f__Lachnospiraceae; g__Coprococcus; s__unidentified_Coprococcus
ASV_992	49.0	108.0	46.0	146.0	0.0	0.0	d__Bacteria; p__Firmicutes; c__Clostridia; o__Clostridiales; f__Peptostreptococcaceae; g__unidentified_Peptostreptococcaceae; s__unidentified_Peptostreptococcaceae
ASV_2774	85.0	111.0	98.0	72.0	119.0	150.0	d__Bacteria; p__Proteobacteria; c__Alphaproteobacteria; o__Caulobacterales; f__Caulobacteraceae; g__Caulobacter; s__unidentified_Caulobacter
ASV_2244	105.0	176.0	108.0	65.0	32.0	18.0	d__Bacteria; p__Firmicutes; c__Clostridia; o__Clostridiales; f__[Mogibacteriaceae]; g__unidentified_[Mogibacteriaceae]; s__unidentified_[Mogibacteriaceae]
ASV_13700	697.0	49.0	393.0	0.0	0.0	92.0	d__Bacteria; p__Bacteroidetes; c__Bacteroidia; o__Bacteroidales; f__Bacteroidaceae; g__Bacteroides; s__unidentified_Bacteroides
ASV_25612	91.0	374.0	0.0	82.0	12.0	0.0	d__Bacteria; p__Firmicutes; c__Clostridia; o__Clostridiales; f__Ruminococcaceae; g__Ruminococcus; s__unidentified_Ruminococcus
ASV_20410	0.0	0.0	0.0	168.0	400.0	308.0	d__Bacteria; p__Proteobacteria; c__Gammaproteobacteria; o__Xanthomonadales; f__Xanthomonadaceae; g__unidentified_Xanthomonadaceae; s__unidentified_Xanthomonadaceae
ASV_22200	249.0	207.0	95.0	78.0	57.0	46.0	d__Bacteria; p__Firmicutes; c__Clostridia; o__Clostridiales; f__Lachnospiraceae; g__Coprococcus; s__unidentified_Coprococcus
ASV_21529	389.0	25.0	43.0	35.0	7.0	158.0	d__Bacteria; p__Bacteroidetes; c__Bacteroidia; o__Bacteroidales; f__Porphyromonadaceae; g__Parabacteroides; s__unidentified_Parabacteroides
ASV_20785	10.0	0.0	82.0	117.0	133.0	242.0	d__Bacteria; p__Firmicutes; c__Clostridia; o__Clostridiales; f__Clostridiaceae; g__Clostridium; s__Clostridium_perfringens
ASV_8492	24.0	85.0	0.0	386.0	0.0	55.0	d__Bacteria; p__Firmicutes; c__Clostridia; o__Clostridiales; f__Lachnospiraceae; g__unidentified_Lachnospiraceae; s__unidentified_Lachnospiraceae
ASV_15461	0.0	27.0	38.0	106.0	0.0	0.0	d__Bacteria; p__Firmicutes; c__Clostridia; o__Clostridiales; f__Lachnospiraceae; g__unidentified_Lachnospiraceae; s__unidentified_Lachnospiraceae
ASV_2085	37.0	82.0	13.0	92.0	14.0	91.0	d__Bacteria; p__Firmicutes; c__Clostridia; o__Clostridiales; f__Lachnospiraceae; g__unclassified_Lachnospiraceae; s__unclassified_Lachnospiraceae
ASV_13909	216.0	33.0	0.0	66.0	90.0	156.0	d__Bacteria; p__Firmicutes; c__Clostridia; o__Clostridiales; f__Lachnospiraceae; g__Roseburia; s__unidentified_Roseburia
ASV_25279	99.0	78.0	53.0	18.0	30.0	166.0	d__Bacteria; p__Firmicutes; c__Bacilli; o__Lactobacillales; f__Lactobacillaceae; g__Lactobacillus; s__unclassified_Lactobacillus
ASV_24298	254.0	407.0	299.0	13.0	0.0	33.0	d__Bacteria; p__Bacteroidetes; c__Bacteroidia; o__Bacteroidales; f__S24-7; g__unidentified_S24-7; s__unidentified_S24-7
ASV_18116	130.0	66.0	91.0	77.0	145.0	30.0	d__Bacteria; p__Proteobacteria; c__Betaproteobacteria; o__Burkholderiales; f__Comamonadaceae; g__Pelomonas; s__unclassified_Pelomonas
ASV_4318	0.0	0.0	0.0	77.0	0.0	0.0	d__Bacteria; p__Firmicutes; c__Clostridia; o__Clostridiales; f__unidentified_Clostridiales; g__unidentified_Clostridiales; s__unidentified_Clostridiales
ASV_10415	251.0	331.0	28.0	26.0	44.0	27.0	d__Bacteria; p__Firmicutes; c__Clostridia; o__Clostridiales; f__unidentified_Clostridiales; g__unidentified_Clostridiales; s__unidentified_Clostridiales
ASV_1399	20.0	7.0	21.0	17.0	29.0	310.0	d__Bacteria; p__Firmicutes; c__Clostridia; o__Clostridiales; f__Lachnospiraceae; g__[Ruminococcus]; s__[Ruminococcus]_gnavus
ASV_15327	358.0	37.0	0.0	0.0	19.0	0.0	d__Bacteria; p__Firmicutes; c__Clostridia; o__Clostridiales; f__unidentified_Clostridiales; g__unidentified_Clostridiales; s__unidentified_Clostridiales
ASV_17229	26.0	385.0	228.0	0.0	0.0	56.0	d__Bacteria; p__Firmicutes; c__Clostridia; o__Clostridiales; f__unidentified_Clostridiales; g__unidentified_Clostridiales; s__unidentified_Clostridiales
ASV_4408	0.0	0.0	0.0	75.0	20.0	109.0	d__Bacteria; p__Firmicutes; c__Clostridia; o__Clostridiales; f__Lachnospiraceae; g__unidentified_Lachnospiraceae; s__unidentified_Lachnospiraceae
ASV_19601	40.0	75.0	39.0	9.0	39.0	143.0	d__Bacteria; p__Proteobacteria; c__Gammaproteobacteria; o__Pseudomonadales; f__Moraxellaceae; g__Acinetobacter; s__Acinetobacter_johnsonii
ASV_25631	0.0	77.0	0.0	74.0	0.0	0.0	d__Bacteria; p__Firmicutes; c__Clostridia; o__Clostridiales; f__Ruminococcaceae; g__unidentified_Ruminococcaceae; s__unidentified_Ruminococcaceae
ASV_11310	0.0	15.0	65.0	160.0	100.0	76.0	d__Bacteria; p__Firmicutes; c__Clostridia; o__Clostridiales; f__Clostridiaceae; g__Clostridium; s__Clostridium_celatum
ASV_13604	0.0	49.0	830.0	0.0	82.0	76.0	d__Bacteria; p__Firmicutes; c__Clostridia; o__Clostridiales; f__Clostridiaceae; g__Clostridium; s__unidentified_Clostridium
ASV_13887	0.0	108.0	0.0	458.0	0.0	7.0	d__Bacteria; p__Firmicutes; c__Clostridia; o__Clostridiales; f__Clostridiaceae; g__Clostridium; s__unidentified_Clostridium
ASV_14288	335.0	188.0	115.0	0.0	27.0	0.0	d__Bacteria; p__Bacteroidetes; c__Bacteroidia; o__Bacteroidales; f__S24-7; g__unidentified_S24-7; s__unidentified_S24-7
ASV_13227	0.0	0.0	116.0	0.0	0.0	20.0	d__Bacteria; p__Firmicutes; c__Clostridia; o__Clostridiales; f__Ruminococcaceae; g__Oscillospira; s__unidentified_Oscillospira
ASV_14456	237.0	169.0	12.0	0.0	0.0	0.0	d__Bacteria; p__Firmicutes; c__Clostridia; o__Clostridiales; f__Ruminococcaceae; g__unidentified_Ruminococcaceae; s__unidentified_Ruminococcaceae
ASV_14116	20.0	100.0	59.0	133.0	0.0	0.0	d__Bacteria; p__Firmicutes; c__Clostridia; o__Clostridiales; f__unclassified_Clostridiales; g__unclassified_Clostridiales; s__unclassified_Clostridiales
ASV_8130	183.0	426.0	241.0	0.0	0.0	0.0	d__Bacteria; p__Firmicutes; c__Clostridia; o__Clostridiales; f__unidentified_Clostridiales; g__unidentified_Clostridiales; s__unidentified_Clostridiales
ASV_1246	13.0	0.0	40.0	21.0	0.0	607.0	d__Bacteria; p__OP8; c__OP8_1; o__unidentified_OP8_1; f__unidentified_OP8_1; g__unidentified_OP8_1; s__unidentified_OP8_1
ASV_22313	374.0	129.0	130.0	20.0	0.0	0.0	d__Bacteria; p__Bacteroidetes; c__Bacteroidia; o__Bacteroidales; f__Bacteroidaceae; g__Bacteroides; s__unidentified_Bacteroides
ASV_19424	124.0	24.0	23.0	33.0	11.0	23.0	d__Bacteria; p__Proteobacteria; c__Betaproteobacteria; o__Burkholderiales; f__Oxalobacteraceae; g__Cupriavidus; s__Cupriavidus_gilardii
ASV_3487	50.0	0.0	43.0	192.0	86.0	28.0	d__Bacteria; p__Firmicutes; c__Clostridia; o__Clostridiales; f__Lachnospiraceae; g__Roseburia; s__unidentified_Roseburia
ASV_5559	263.0	33.0	182.0	4.0	0.0	14.0	d__Bacteria; p__Bacteroidetes; c__Bacteroidia; o__Bacteroidales; f__S24-7; g__unidentified_S24-7; s__unidentified_S24-7
ASV_3386	0.0	0.0	0.0	183.0	303.0	148.0	d__Bacteria; p__Actinobacteria; c__Thermoleophilia; o__Solirubrobacterales; f__unidentified_Solirubrobacterales; g__unidentified_Solirubrobacterales; s__unidentified_Solirubrobacterales
ASV_17357	43.0	132.0	130.0	0.0	0.0	0.0	d__Bacteria; p__Firmicutes; c__Clostridia; o__Clostridiales; f__unidentified_Clostridiales; g__unidentified_Clostridiales; s__unidentified_Clostridiales
ASV_8607	9.0	10.0	0.0	3.0	0.0	19.0	d__Bacteria; p__Firmicutes; c__Clostridia; o__Clostridiales; f__Clostridiaceae; g__Clostridium; s__unidentified_Clostridium
ASV_25491	0.0	0.0	0.0	0.0	0.0	42.0	d__Bacteria; p__Firmicutes; c__Clostridia; o__Clostridiales; f__Ruminococcaceae; g__Ruminococcus; s__Ruminococcus_flavefaciens
ASV_23903	87.0	45.0	151.0	42.0	0.0	36.0	d__Bacteria; p__Firmicutes; c__Clostridia; o__Clostridiales; f__Lachnospiraceae; g__unclassified_Lachnospiraceae; s__unclassified_Lachnospiraceae
ASV_9664	125.0	13.0	58.0	27.0	152.0	112.0	d__Bacteria; p__Bacteroidetes; c__Bacteroidia; o__Bacteroidales; f__p-2534-18B5; g__unidentified_p-2534-18B5; s__unidentified_p-2534-18B5
ASV_17093	509.0	30.0	0.0	47.0	55.0	4.0	d__Bacteria; p__Tenericutes; c__Mollicutes; o__RF39; f__unidentified_RF39; g__unidentified_RF39; s__unidentified_RF39
ASV_7869	225.0	5.0	121.0	22.0	0.0	53.0	d__Bacteria; p__Firmicutes; c__Clostridia; o__Clostridiales; f__Lachnospiraceae; g__[Ruminococcus]; s__[Ruminococcus]_gnavus
ASV_25972	37.0	62.0	47.0	62.0	29.0	90.0	d__Bacteria; p__Proteobacteria; c__Alphaproteobacteria; o__Caulobacterales; f__Caulobacteraceae; g__Brevundimonas; s__Brevundimonas_intermedia
ASV_24082	0.0	914.0	0.0	0.0	0.0	0.0	d__Bacteria; p__Firmicutes; c__Clostridia; o__Clostridiales; f__Ruminococcaceae; g__Ruminococcus; s__Ruminococcus_flavefaciens
ASV_4095	0.0	0.0	0.0	291.0	2.0	15.0	d__Bacteria; p__Firmicutes; c__Clostridia; o__Clostridiales; f__unclassified_Clostridiales; g__unclassified_Clostridiales; s__unclassified_Clostridiales
ASV_15599	0.0	0.0	0.0	84.0	232.0	200.0	d__Bacteria; p__Firmicutes; c__Clostridia; o__Clostridiales; f__Clostridiaceae; g__Proteiniclasticum; s__unidentified_Proteiniclasticum
ASV_1093	0.0	0.0	0.0	74.0	152.0	313.0	d__Bacteria; p__Proteobacteria; c__Gammaproteobacteria; o__Pseudomonadales; f__Moraxellaceae; g__Acinetobacter; s__unidentified_Acinetobacter
ASV_18084	20.0	0.0	518.0	40.0	0.0	101.0	d__Bacteria; p__Firmicutes; c__Clostridia; o__Clostridiales; f__Ruminococcaceae; g__Oscillospira; s__unidentified_Oscillospira
ASV_2667	0.0	0.0	11.0	58.0	0.0	25.0	d__Bacteria; p__Firmicutes; c__Clostridia; o__Clostridiales; f__Lachnospiraceae; g__unidentified_Lachnospiraceae; s__unidentified_Lachnospiraceae
ASV_24661	14.0	9.0	67.0	0.0	46.0	376.0	d__Bacteria; p__Proteobacteria; c__Betaproteobacteria; o__Burkholderiales; f__Comamonadaceae; g__Schlegelella; s__unidentified_Schlegelella
ASV_8755	163.0	228.0	60.0	16.0	0.0	0.0	d__Bacteria; p__Firmicutes; c__Clostridia; o__Clostridiales; f__Christensenellaceae; g__unidentified_Christensenellaceae; s__unidentified_Christensenellaceae
ASV_25069	46.0	0.0	0.0	210.0	108.0	36.0	d__Bacteria; p__Firmicutes; c__Clostridia; o__Clostridiales; f__Lachnospiraceae; g__Roseburia; s__unidentified_Roseburia
ASV_6978	0.0	0.0	379.0	0.0	0.0	0.0	d__Bacteria; p__Firmicutes; c__Clostridia; o__Clostridiales; f__Lachnospiraceae; g__Coprococcus; s__unidentified_Coprococcus
ASV_164	0.0	0.0	0.0	111.0	213.0	205.0	d__Bacteria; p__Proteobacteria; c__Gammaproteobacteria; o__Pseudomonadales; f__Moraxellaceae; g__Psychrobacter; s__unidentified_Psychrobacter
ASV_26419	228.0	119.0	420.0	8.0	0.0	1.0	d__Bacteria; p__Bacteroidetes; c__Bacteroidia; o__Bacteroidales; f__[Paraprevotellaceae]; g__Paraprevotella; s__unidentified_Paraprevotella
ASV_15641	266.0	11.0	12.0	17.0	12.0	146.0	d__Bacteria; p__Proteobacteria; c__Gammaproteobacteria; o__Pseudomonadales; f__Moraxellaceae; g__Acinetobacter; s__Acinetobacter_johnsonii
ASV_24190	0.0	0.0	0.0	182.0	27.0	0.0	d__Bacteria; p__Firmicutes; c__Clostridia; o__Clostridiales; f__Lachnospiraceae; g__Coprococcus; s__unidentified_Coprococcus
ASV_17033	139.0	39.0	83.0	184.0	0.0	95.0	d__Bacteria; p__Firmicutes; c__Clostridia; o__Clostridiales; f__Lachnospiraceae; g__unidentified_Lachnospiraceae; s__unidentified_Lachnospiraceae
ASV_3837	0.0	222.0	0.0	0.0	0.0	0.0	d__Bacteria; p__Tenericutes; c__Mollicutes; o__RF39; f__unidentified_RF39; g__unidentified_RF39; s__unidentified_RF39
ASV_15331	0.0	26.0	11.0	24.0	0.0	44.0	d__Bacteria; p__Firmicutes; c__Clostridia; o__Clostridiales; f__unidentified_Clostridiales; g__unidentified_Clostridiales; s__unidentified_Clostridiales
ASV_4062	68.0	0.0	45.0	17.0	109.0	104.0	d__Bacteria; p__Firmicutes; c__Clostridia; o__Clostridiales; f__Ruminococcaceae; g__Oscillospira; s__unidentified_Oscillospira
ASV_4122	68.0	89.0	68.0	15.0	16.0	61.0	d__Bacteria; p__Proteobacteria; c__Gammaproteobacteria; o__Pseudomonadales; f__Moraxellaceae; g__Acinetobacter; s__Acinetobacter_lwoffii
ASV_13860	118.0	128.0	98.0	21.0	27.0	32.0	d__Bacteria; p__Bacteroidetes; c__Bacteroidia; o__Bacteroidales; f__S24-7; g__unidentified_S24-7; s__unidentified_S24-7
ASV_19146	0.0	0.0	0.0	0.0	347.0	134.0	d__Bacteria; p__Firmicutes; c__Clostridia; o__Clostridiales; f__Ruminococcaceae; g__Ruminococcus; s__Ruminococcus_flavefaciens
ASV_1289	0.0	92.0	0.0	0.0	0.0	0.0	d__Bacteria; p__Firmicutes; c__Clostridia; o__Clostridiales; f__unidentified_Clostridiales; g__unidentified_Clostridiales; s__unidentified_Clostridiales
ASV_15867	228.0	130.0	383.0	0.0	0.0	0.0	d__Bacteria; p__Bacteroidetes; c__Bacteroidia; o__Bacteroidales; f__S24-7; g__unidentified_S24-7; s__unidentified_S24-7
ASV_23451	137.0	30.0	158.0	19.0	0.0	9.0	d__Bacteria; p__Firmicutes; c__Clostridia; o__Clostridiales; f__Lachnospiraceae; g__Coprococcus; s__unidentified_Coprococcus
ASV_25954	0.0	0.0	0.0	35.0	0.0	25.0	d__Bacteria; p__Firmicutes; c__Clostridia; o__Clostridiales; f__Lachnospiraceae; g__unidentified_Lachnospiraceae; s__unidentified_Lachnospiraceae
ASV_15275	254.0	21.0	166.0	7.0	0.0	16.0	d__Bacteria; p__Bacteroidetes; c__Bacteroidia; o__Bacteroidales; f__S24-7; g__unidentified_S24-7; s__unidentified_S24-7
ASV_2903	0.0	136.0	22.0	0.0	477.0	12.0	d__Bacteria; p__Fusobacteria; c__Fusobacteriia; o__Fusobacteriales; f__Fusobacteriaceae; g__Cetobacterium; s__Cetobacterium_somerae
ASV_3368	261.0	126.0	344.0	0.0	0.0	0.0	d__Bacteria; p__Bacteroidetes; c__Bacteroidia; o__Bacteroidales; f__S24-7; g__unidentified_S24-7; s__unidentified_S24-7
ASV_23373	6.0	0.0	0.0	0.0	0.0	0.0	d__Bacteria; p__Firmicutes; c__Clostridia; o__Clostridiales; f__Lachnospiraceae; g__unclassified_Lachnospiraceae; s__unclassified_Lachnospiraceae
ASV_5678	222.0	95.0	379.0	0.0	0.0	0.0	d__Bacteria; p__Bacteroidetes; c__Bacteroidia; o__Bacteroidales; f__[Paraprevotellaceae]; g__Paraprevotella; s__unidentified_Paraprevotella
ASV_19934	0.0	0.0	831.0	0.0	0.0	0.0	d__Bacteria; p__Firmicutes; c__Clostridia; o__Clostridiales; f__unidentified_Clostridiales; g__unidentified_Clostridiales; s__unidentified_Clostridiales
ASV_15723	0.0	116.0	0.0	73.0	0.0	14.0	d__Bacteria; p__Firmicutes; c__Clostridia; o__Clostridiales; f__Clostridiaceae; g__Clostridium; s__Clostridium_celatum
ASV_25859	76.0	70.0	0.0	228.0	7.0	12.0	d__Bacteria; p__Firmicutes; c__Clostridia; o__Clostridiales; f__Lachnospiraceae; g__unidentified_Lachnospiraceae; s__unidentified_Lachnospiraceae
ASV_165	48.0	40.0	152.0	11.0	0.0	34.0	d__Bacteria; p__Bacteroidetes; c__Bacteroidia; o__Bacteroidales; f__S24-7; g__unidentified_S24-7; s__unidentified_S24-7
ASV_2122	77.0	26.0	46.0	27.0	0.0	47.0	d__Bacteria; p__Bacteroidetes; c__Bacteroidia; o__Bacteroidales; f__unidentified_Bacteroidales; g__unidentified_Bacteroidales; s__unidentified_Bacteroidales
ASV_14078	122.0	36.0	30.0	10.0	9.0	6.0	d__Bacteria; p__Firmicutes; c__Erysipelotrichi; o__Erysipelotrichales; f__Erysipelotrichaceae; g__Clostridium; s__Clostridium_saccharogumia
ASV_23539	147.0	59.0	0.0	13.0	0.0	29.0	d__Bacteria; p__Firmicutes; c__Clostridia; o__Clostridiales; f__Peptococcaceae; g__rc4-4; s__unidentified_rc4-4
ASV_14090	111.0	70.0	207.0	55.0	0.0	28.0	d__Bacteria; p__Bacteroidetes; c__Bacteroidia; o__Bacteroidales; f__S24-7; g__unidentified_S24-7; s__unidentified_S24-7
ASV_17537	0.0	0.0	0.0	89.0	200.0	147.0	d__Bacteria; p__Actinobacteria; c__Actinobacteria; o__Actinomycetales; f__Nocardioidaceae; g__Nocardioides; s__unidentified_Nocardioides
ASV_3498	54.0	23.0	19.0	46.0	70.0	98.0	d__Bacteria; p__Firmicutes; c__Clostridia; o__Clostridiales; f__Ruminococcaceae; g__Oscillospira; s__Oscillospira_guilliermondii
ASV_1992	0.0	81.0	0.0	117.0	8.0	0.0	d__Bacteria; p__Firmicutes; c__Clostridia; o__Clostridiales; f__Ruminococcaceae; g__unidentified_Ruminococcaceae; s__unidentified_Ruminococcaceae
ASV_13804	40.0	18.0	56.0	111.0	80.0	98.0	d__Bacteria; p__Firmicutes; c__Clostridia; o__Clostridiales; f__Peptostreptococcaceae; g__[Clostridium]; s__[Clostridium]_glycolicum
ASV_2714	0.0	0.0	0.0	0.0	0.0	6.0	d__Bacteria; p__Firmicutes; c__Clostridia; o__Clostridiales; f__Lachnospiraceae; g__unidentified_Lachnospiraceae; s__unidentified_Lachnospiraceae
ASV_11995	69.0	168.0	21.0	9.0	0.0	47.0	d__Bacteria; p__Firmicutes; c__Clostridia; o__Clostridiales; f__Ruminococcaceae; g__unclassified_Ruminococcaceae; s__unclassified_Ruminococcaceae
ASV_17857	0.0	102.0	0.0	4.0	0.0	12.0	d__Bacteria; p__Bacteroidetes; c__Bacteroidia; o__Bacteroidales; f__S24-7; g__unidentified_S24-7; s__unidentified_S24-7
ASV_3966	0.0	3.0	43.0	9.0	41.0	352.0	d__Bacteria; p__Proteobacteria; c__Betaproteobacteria; o__Rhodocyclales; f__Rhodocyclaceae; g__Hydrogenophilus; s__unidentified_Hydrogenophilus
ASV_9477	21.0	0.0	45.0	80.0	49.0	122.0	d__Bacteria; p__Firmicutes; c__Clostridia; o__Clostridiales; f__Clostridiaceae; g__SMB53; s__unidentified_SMB53
ASV_13467	32.0	99.0	259.0	19.0	0.0	0.0	d__Bacteria; p__Firmicutes; c__Clostridia; o__Clostridiales; f__Ruminococcaceae; g__Oscillospira; s__unidentified_Oscillospira
ASV_4441	118.0	16.0	42.0	73.0	11.0	133.0	d__Bacteria; p__Firmicutes; c__Clostridia; o__Clostridiales; f__Lachnospiraceae; g__Dorea; s__unidentified_Dorea
ASV_9914	28.0	78.0	70.0	55.0	2.0	0.0	d__Bacteria; p__Firmicutes; c__Clostridia; o__Clostridiales; f__unidentified_Clostridiales; g__unidentified_Clostridiales; s__unidentified_Clostridiales
ASV_20170	35.0	58.0	50.0	12.0	14.0	72.0	d__Bacteria; p__Bacteroidetes; c__Bacteroidia; o__Bacteroidales; f__Rikenellaceae; g__unidentified_Rikenellaceae; s__unidentified_Rikenellaceae
ASV_6943	45.0	157.0	197.0	0.0	0.0	0.0	d__Bacteria; p__Bacteroidetes; c__Bacteroidia; o__Bacteroidales; f__S24-7; g__unidentified_S24-7; s__unidentified_S24-7
ASV_4449	46.0	5.0	41.0	0.0	0.0	0.0	d__Bacteria; p__Firmicutes; c__Clostridia; o__Clostridiales; f__Lachnospiraceae; g__Coprococcus; s__unidentified_Coprococcus
ASV_20169	19.0	18.0	25.0	43.0	69.0	170.0	d__Bacteria; p__Firmicutes; c__Clostridia; o__Clostridiales; f__Lachnospiraceae; g__unclassified_Lachnospiraceae; s__unclassified_Lachnospiraceae
ASV_25796	119.0	0.0	0.0	103.0	5.0	76.0	d__Bacteria; p__Firmicutes; c__Clostridia; o__Clostridiales; f__Lachnospiraceae; g__Blautia; s__unidentified_Blautia
ASV_23844	271.0	86.0	0.0	0.0	0.0	0.0	d__Bacteria; p__Firmicutes; c__Clostridia; o__Clostridiales; f__Ruminococcaceae; g__Oscillospira; s__unidentified_Oscillospira
ASV_14518	0.0	100.0	0.0	0.0	0.0	0.0	d__Bacteria; p__Firmicutes; c__Clostridia; o__Clostridiales; f__unidentified_Clostridiales; g__unidentified_Clostridiales; s__unidentified_Clostridiales
ASV_355	90.0	114.0	0.0	0.0	0.0	0.0	d__Bacteria; p__Bacteroidetes; c__Bacteroidia; o__Bacteroidales; f__S24-7; g__unidentified_S24-7; s__unidentified_S24-7
ASV_25938	46.0	0.0	103.0	0.0	61.0	81.0	d__Bacteria; p__Firmicutes; c__Clostridia; o__Clostridiales; f__Christensenellaceae; g__unidentified_Christensenellaceae; s__unidentified_Christensenellaceae
ASV_19256	0.0	0.0	0.0	52.0	111.0	174.0	d__Bacteria; p__Firmicutes; c__Clostridia; o__Clostridiales; f__Clostridiaceae; g__Proteiniclasticum; s__unidentified_Proteiniclasticum
ASV_20575	97.0	34.0	59.0	17.0	0.0	0.0	d__Bacteria; p__Firmicutes; c__Clostridia; o__Clostridiales; f__Peptococcaceae; g__rc4-4; s__unidentified_rc4-4
ASV_2882	0.0	0.0	70.0	44.0	0.0	0.0	d__Bacteria; p__Firmicutes; c__Clostridia; o__Clostridiales; f__Ruminococcaceae; g__Ruminococcus; s__unidentified_Ruminococcus
ASV_18851	196.0	0.0	395.0	0.0	0.0	0.0	d__Bacteria; p__Firmicutes; c__Clostridia; o__Clostridiales; f__Ruminococcaceae; g__unidentified_Ruminococcaceae; s__unidentified_Ruminococcaceae
ASV_4153	20.0	0.0	64.0	0.0	94.0	35.0	d__Bacteria; p__Firmicutes; c__Clostridia; o__Clostridiales; f__[Mogibacteriaceae]; g__unidentified_[Mogibacteriaceae]; s__unidentified_[Mogibacteriaceae]
ASV_1689	0.0	69.0	0.0	56.0	0.0	0.0	d__Bacteria; p__Firmicutes; c__Clostridia; o__Clostridiales; f__Peptostreptococcaceae; g__unidentified_Peptostreptococcaceae; s__unidentified_Peptostreptococcaceae
ASV_25514	0.0	0.0	6.0	59.0	86.0	198.0	d__Bacteria; p__Proteobacteria; c__Betaproteobacteria; o__Burkholderiales; f__Burkholderiaceae; g__Burkholderia; s__unclassified_Burkholderia
ASV_17748	4.0	35.0	10.0	35.0	130.0	69.0	d__Bacteria; p__Bacteroidetes; c__Bacteroidia; o__Bacteroidales; f__S24-7; g__unidentified_S24-7; s__unidentified_S24-7
ASV_10577	7.0	0.0	0.0	15.0	0.0	15.0	d__Bacteria; p__Firmicutes; c__Clostridia; o__Clostridiales; f__unidentified_Clostridiales; g__unidentified_Clostridiales; s__unidentified_Clostridiales
ASV_26402	51.0	0.0	106.0	14.0	30.0	0.0	d__Bacteria; p__Bacteroidetes; c__Bacteroidia; o__Bacteroidales; f__S24-7; g__unidentified_S24-7; s__unidentified_S24-7
ASV_12909	0.0	74.0	24.0	36.0	29.0	41.0	d__Bacteria; p__Firmicutes; c__Clostridia; o__Clostridiales; f__Lachnospiraceae; g__Coprococcus; s__unidentified_Coprococcus
ASV_2983	99.0	10.0	18.0	19.0	20.0	70.0	d__Bacteria; p__Proteobacteria; c__Gammaproteobacteria; o__Pseudomonadales; f__Moraxellaceae; g__Acinetobacter; s__unclassified_Acinetobacter
ASV_8022	76.0	55.0	121.0	0.0	0.0	39.0	d__Bacteria; p__Bacteroidetes; c__Bacteroidia; o__Bacteroidales; f__S24-7; g__unidentified_S24-7; s__unidentified_S24-7
ASV_11762	48.0	0.0	0.0	55.0	91.0	173.0	d__Bacteria; p__Actinobacteria; c__Actinobacteria; o__Bifidobacteriales; f__Bifidobacteriaceae; g__Bifidobacterium; s__unclassified_Bifidobacterium
ASV_19793	350.0	104.0	0.0	0.0	6.0	0.0	d__Bacteria; p__Bacteroidetes; c__Bacteroidia; o__Bacteroidales; f__S24-7; g__unidentified_S24-7; s__unidentified_S24-7
ASV_22998	7.0	0.0	0.0	0.0	0.0	0.0	d__Bacteria; p__Firmicutes; c__Clostridia; o__Clostridiales; f__unidentified_Clostridiales; g__unidentified_Clostridiales; s__unidentified_Clostridiales
ASV_17701	54.0	31.0	0.0	32.0	38.0	147.0	d__Bacteria; p__Firmicutes; c__Clostridia; o__Clostridiales; f__Veillonellaceae; g__Phascolarctobacterium; s__unidentified_Phascolarctobacterium
ASV_7564	178.0	294.0	0.0	0.0	0.0	21.0	d__Bacteria; p__Firmicutes; c__Clostridia; o__Clostridiales; f__Ruminococcaceae; g__unidentified_Ruminococcaceae; s__unidentified_Ruminococcaceae
ASV_13294	123.0	41.0	138.0	5.0	2.0	34.0	d__Bacteria; p__Bacteroidetes; c__Bacteroidia; o__Bacteroidales; f__[Odoribacteraceae]; g__Butyricimonas; s__unidentified_Butyricimonas
ASV_11496	0.0	106.0	0.0	17.0	0.0	0.0	d__Bacteria; p__Firmicutes; c__Clostridia; o__Clostridiales; f__Clostridiaceae; g__Clostridium; s__unclassified_Clostridium
ASV_1157	213.0	0.0	63.0	0.0	39.0	0.0	d__Bacteria; p__Firmicutes; c__Clostridia; o__Clostridiales; f__Lachnospiraceae; g__Coprococcus; s__unidentified_Coprococcus
ASV_12407	250.0	0.0	84.0	0.0	0.0	6.0	d__Bacteria; p__Firmicutes; c__Clostridia; o__Clostridiales; f__Lachnospiraceae; g__Coprococcus; s__unidentified_Coprococcus
ASV_11648	0.0	238.0	0.0	66.0	0.0	0.0	d__Bacteria; p__Firmicutes; c__Bacilli; o__Lactobacillales; f__Lactobacillaceae; g__Lactobacillus; s__unclassified_Lactobacillus
ASV_7681	0.0	0.0	0.0	11.0	87.0	11.0	d__Bacteria; p__Firmicutes; c__Clostridia; o__Clostridiales; f__Ruminococcaceae; g__Oscillospira; s__unidentified_Oscillospira
ASV_9493	33.0	109.0	24.0	24.0	0.0	23.0	d__Bacteria; p__Bacteroidetes; c__Bacteroidia; o__Bacteroidales; f__S24-7; g__unidentified_S24-7; s__unidentified_S24-7
ASV_24679	0.0	97.0	0.0	27.0	154.0	58.0	d__Bacteria; p__Firmicutes; c__Clostridia; o__Clostridiales; f__unidentified_Clostridiales; g__unidentified_Clostridiales; s__unidentified_Clostridiales
ASV_3106	33.0	47.0	146.0	0.0	0.0	0.0	d__Bacteria; p__Bacteroidetes; c__Bacteroidia; o__Bacteroidales; f__S24-7; g__unidentified_S24-7; s__unidentified_S24-7
ASV_3471	53.0	54.0	25.0	19.0	0.0	0.0	d__Bacteria; p__Firmicutes; c__Clostridia; o__Clostridiales; f__Ruminococcaceae; g__Oscillospira; s__unidentified_Oscillospira
ASV_11577	10.0	0.0	7.0	30.0	96.0	179.0	d__Bacteria; p__Proteobacteria; c__Alphaproteobacteria; o__Rhizobiales; f__Bradyrhizobiaceae; g__unclassified_Bradyrhizobiaceae; s__unclassified_Bradyrhizobiaceae
ASV_11126	38.0	30.0	24.0	34.0	0.0	24.0	d__Bacteria; p__Firmicutes; c__Clostridia; o__Clostridiales; f__[Mogibacteriaceae]; g__unidentified_[Mogibacteriaceae]; s__unidentified_[Mogibacteriaceae]
ASV_15586	14.0	89.0	0.0	7.0	8.0	0.0	d__Bacteria; p__Firmicutes; c__Clostridia; o__Clostridiales; f__Ruminococcaceae; g__unidentified_Ruminococcaceae; s__unidentified_Ruminococcaceae
ASV_25078	149.0	85.0	58.0	4.0	0.0	6.0	d__Bacteria; p__Bacteroidetes; c__Bacteroidia; o__Bacteroidales; f__S24-7; g__unidentified_S24-7; s__unidentified_S24-7
ASV_9204	103.0	18.0	80.0	24.0	53.0	15.0	d__Bacteria; p__Firmicutes; c__Clostridia; o__Clostridiales; f__Ruminococcaceae; g__unclassified_Ruminococcaceae; s__unclassified_Ruminococcaceae
ASV_5018	56.0	49.0	52.0	17.0	0.0	0.0	d__Bacteria; p__Firmicutes; c__Clostridia; o__Clostridiales; f__[Mogibacteriaceae]; g__unidentified_[Mogibacteriaceae]; s__unidentified_[Mogibacteriaceae]
ASV_4899	106.0	6.0	0.0	20.0	0.0	32.0	d__Bacteria; p__Firmicutes; c__Clostridia; o__Clostridiales; f__unidentified_Clostridiales; g__unidentified_Clostridiales; s__unidentified_Clostridiales
ASV_21227	89.0	0.0	27.0	34.0	37.0	13.0	d__Bacteria; p__Firmicutes; c__Clostridia; o__Clostridiales; f__Ruminococcaceae; g__Oscillospira; s__unidentified_Oscillospira
ASV_23801	44.0	38.0	27.0	30.0	30.0	95.0	d__Bacteria; p__Firmicutes; c__Clostridia; o__Clostridiales; f__Ruminococcaceae; g__Oscillospira; s__unidentified_Oscillospira
ASV_25114	0.0	0.0	0.0	0.0	60.0	0.0	d__Bacteria; p__Proteobacteria; c__Gammaproteobacteria; o__Enterobacteriales; f__Enterobacteriaceae; g__unclassified_Enterobacteriaceae; s__unclassified_Enterobacteriaceae
ASV_590	44.0	17.0	170.0	0.0	0.0	12.0	d__Bacteria; p__Bacteroidetes; c__Bacteroidia; o__Bacteroidales; f__S24-7; g__unidentified_S24-7; s__unidentified_S24-7
ASV_1150	0.0	0.0	520.0	0.0	0.0	0.0	d__Bacteria; p__Firmicutes; c__Clostridia; o__Clostridiales; f__Peptostreptococcaceae; g__unclassified_Peptostreptococcaceae; s__unclassified_Peptostreptococcaceae
ASV_12763	0.0	0.0	0.0	59.0	103.0	166.0	d__Bacteria; p__Firmicutes; c__Clostridia; o__Clostridiales; f__Clostridiaceae; g__Proteiniclasticum; s__unidentified_Proteiniclasticum
ASV_2859	0.0	0.0	0.0	0.0	122.0	102.0	d__Bacteria; p__Firmicutes; c__Clostridia; o__Clostridiales; f__Ruminococcaceae; g__Oscillospira; s__unidentified_Oscillospira
ASV_6371	21.0	0.0	195.0	0.0	44.0	0.0	d__Bacteria; p__Firmicutes; c__Clostridia; o__Clostridiales; f__unidentified_Clostridiales; g__unidentified_Clostridiales; s__unidentified_Clostridiales
ASV_19643	80.0	25.0	28.0	49.0	0.0	20.0	d__Bacteria; p__Firmicutes; c__Clostridia; o__Clostridiales; f__Lachnospiraceae; g__unidentified_Lachnospiraceae; s__unidentified_Lachnospiraceae
ASV_5891	18.0	0.0	41.0	36.0	52.0	52.0	d__Bacteria; p__Firmicutes; c__Clostridia; o__Clostridiales; f__Clostridiaceae; g__Clostridium; s__Clostridium_baratii
ASV_16869	20.0	83.0	95.0	0.0	5.0	16.0	d__Bacteria; p__Bacteroidetes; c__Bacteroidia; o__Bacteroidales; f__S24-7; g__unidentified_S24-7; s__unidentified_S24-7
ASV_13732	0.0	0.0	0.0	119.0	84.0	63.0	d__Bacteria; p__Spirochaetes; c__Spirochaetes; o__Spirochaetales; f__Spirochaetaceae; g__Treponema; s__unidentified_Treponema
ASV_17235	34.0	14.0	0.0	13.0	215.0	60.0	d__Bacteria; p__Firmicutes; c__Clostridia; o__Clostridiales; f__Ruminococcaceae; g__unidentified_Ruminococcaceae; s__unidentified_Ruminococcaceae
ASV_8645	0.0	85.0	0.0	22.0	0.0	0.0	d__Bacteria; p__Firmicutes; c__Clostridia; o__Clostridiales; f__Clostridiaceae; g__Clostridium; s__unclassified_Clostridium
ASV_17326	0.0	0.0	0.0	0.0	68.0	0.0	d__Bacteria; p__Proteobacteria; c__Gammaproteobacteria; o__Enterobacteriales; f__Enterobacteriaceae; g__unclassified_Enterobacteriaceae; s__unclassified_Enterobacteriaceae
ASV_23627	32.0	54.0	59.0	46.0	0.0	0.0	d__Bacteria; p__Firmicutes; c__Clostridia; o__Clostridiales; f__unidentified_Clostridiales; g__unidentified_Clostridiales; s__unidentified_Clostridiales
ASV_16166	0.0	0.0	0.0	0.0	54.0	80.0	d__Bacteria; p__Firmicutes; c__Clostridia; o__Clostridiales; f__unclassified_Clostridiales; g__unclassified_Clostridiales; s__unclassified_Clostridiales
ASV_4246	22.0	0.0	40.0	0.0	27.0	50.0	d__Bacteria; p__Firmicutes; c__Clostridia; o__Clostridiales; f__Christensenellaceae; g__unidentified_Christensenellaceae; s__unidentified_Christensenellaceae
ASV_10858	0.0	0.0	0.0	27.0	60.0	73.0	d__Bacteria; p__Firmicutes; c__Clostridia; o__Clostridiales; f__Lachnospiraceae; g__Coprococcus; s__unidentified_Coprococcus
ASV_16590	97.0	111.0	21.0	0.0	0.0	0.0	d__Bacteria; p__Firmicutes; c__Clostridia; o__Clostridiales; f__Lachnospiraceae; g__Roseburia; s__unidentified_Roseburia
ASV_24192	11.0	22.0	14.0	43.0	0.0	25.0	d__Bacteria; p__Bacteroidetes; c__Bacteroidia; o__Bacteroidales; f__Rikenellaceae; g__unidentified_Rikenellaceae; s__unidentified_Rikenellaceae
ASV_14646	0.0	0.0	0.0	20.0	0.0	0.0	d__Bacteria; p__Firmicutes; c__Clostridia; o__Clostridiales; f__Ruminococcaceae; g__Ruminococcus; s__Ruminococcus_flavefaciens
ASV_15589	322.0	0.0	0.0	0.0	14.0	28.0	d__Bacteria; p__Firmicutes; c__Clostridia; o__Clostridiales; f__Ruminococcaceae; g__Ruminococcus; s__unidentified_Ruminococcus
ASV_2007	0.0	0.0	19.0	55.0	177.0	39.0	d__Bacteria; p__Cyanobacteria; c__Chloroplast; o__Streptophyta; f__unidentified_Streptophyta; g__unidentified_Streptophyta; s__unidentified_Streptophyta
ASV_4893	18.0	62.0	50.0	46.0	0.0	0.0	d__Bacteria; p__Firmicutes; c__Clostridia; o__Clostridiales; f__Lachnospiraceae; g__unidentified_Lachnospiraceae; s__unidentified_Lachnospiraceae
ASV_20600	91.0	46.0	47.0	41.0	0.0	10.0	d__Bacteria; p__Firmicutes; c__Clostridia; o__Clostridiales; f__Lachnospiraceae; g__unclassified_Lachnospiraceae; s__unclassified_Lachnospiraceae
ASV_23981	31.0	20.0	37.0	7.0	5.0	18.0	d__Bacteria; p__Firmicutes; c__Clostridia; o__Clostridiales; f__[Mogibacteriaceae]; g__unidentified_[Mogibacteriaceae]; s__unidentified_[Mogibacteriaceae]
ASV_1419	0.0	67.0	41.0	0.0	0.0	24.0	d__Bacteria; p__Bacteroidetes; c__Bacteroidia; o__Bacteroidales; f__Rikenellaceae; g__unidentified_Rikenellaceae; s__unidentified_Rikenellaceae
ASV_24091	0.0	126.0	0.0	0.0	0.0	0.0	d__Bacteria; p__Firmicutes; c__Clostridia; o__Clostridiales; f__Clostridiaceae; g__Clostridium; s__unclassified_Clostridium
ASV_13168	26.0	0.0	0.0	157.0	0.0	57.0	d__Bacteria; p__Firmicutes; c__Clostridia; o__Clostridiales; f__unclassified_Clostridiales; g__unclassified_Clostridiales; s__unclassified_Clostridiales
ASV_13028	5.0	19.0	10.0	35.0	0.0	0.0	d__Bacteria; p__Firmicutes; c__Clostridia; o__Clostridiales; f__Christensenellaceae; g__unidentified_Christensenellaceae; s__unidentified_Christensenellaceae
ASV_5506	0.0	12.0	0.0	0.0	0.0	121.0	d__Bacteria; p__Firmicutes; c__Clostridia; o__Clostridiales; f__Christensenellaceae; g__unidentified_Christensenellaceae; s__unidentified_Christensenellaceae
ASV_9497	0.0	0.0	0.0	145.0	0.0	0.0	d__Bacteria; p__Firmicutes; c__Clostridia; o__Clostridiales; f__unidentified_Clostridiales; g__unidentified_Clostridiales; s__unidentified_Clostridiales
ASV_19944	0.0	0.0	0.0	0.0	50.0	7.0	d__Bacteria; p__Firmicutes; c__Clostridia; o__Clostridiales; f__unidentified_Clostridiales; g__unidentified_Clostridiales; s__unidentified_Clostridiales
ASV_24125	0.0	25.0	35.0	0.0	61.0	51.0	d__Bacteria; p__Bacteroidetes; c__Bacteroidia; o__Bacteroidales; f__unidentified_Bacteroidales; g__unidentified_Bacteroidales; s__unidentified_Bacteroidales
ASV_19845	64.0	0.0	54.0	15.0	0.0	48.0	d__Bacteria; p__Proteobacteria; c__Betaproteobacteria; o__Burkholderiales; f__Alcaligenaceae; g__Sutterella; s__unidentified_Sutterella
ASV_4022	0.0	0.0	0.0	32.0	193.0	20.0	d__Bacteria; p__Actinobacteria; c__Actinobacteria; o__Actinomycetales; f__Nocardioidaceae; g__Nocardioides; s__unidentified_Nocardioides
ASV_20183	85.0	48.0	40.0	11.0	0.0	0.0	d__Bacteria; p__Firmicutes; c__Clostridia; o__Clostridiales; f__unidentified_Clostridiales; g__unidentified_Clostridiales; s__unidentified_Clostridiales
ASV_10284	97.0	0.0	55.0	0.0	0.0	0.0	d__Bacteria; p__Firmicutes; c__Bacilli; o__Bacillales; f__Bacillaceae; g__unidentified_Bacillaceae; s__unidentified_Bacillaceae
ASV_5362	0.0	0.0	0.0	0.0	0.0	11.0	d__Bacteria; p__Firmicutes; c__Clostridia; o__Clostridiales; f__unidentified_Clostridiales; g__unidentified_Clostridiales; s__unidentified_Clostridiales
ASV_11616	37.0	38.0	0.0	58.0	0.0	19.0	d__Bacteria; p__Firmicutes; c__Clostridia; o__Clostridiales; f__Lachnospiraceae; g__unidentified_Lachnospiraceae; s__unidentified_Lachnospiraceae
ASV_17012	24.0	19.0	9.0	12.0	95.0	62.0	d__Bacteria; p__Firmicutes; c__Clostridia; o__Clostridiales; f__Ruminococcaceae; g__unclassified_Ruminococcaceae; s__unclassified_Ruminococcaceae
ASV_10717	0.0	0.0	49.0	5.0	25.0	148.0	d__Bacteria; p__Firmicutes; c__Bacilli; o__Bacillales; f__Bacillaceae; g__Bacillus; s__Bacillus_thermoamylovorans
ASV_13321	0.0	0.0	0.0	88.0	37.0	72.0	d__Bacteria; p__Firmicutes; c__Bacilli; o__Bacillales; f__Bacillaceae; g__Bacillus; s__Bacillus_flexus
ASV_17836	21.0	164.0	71.0	0.0	0.0	24.0	d__Bacteria; p__Firmicutes; c__Clostridia; o__Clostridiales; f__unidentified_Clostridiales; g__unidentified_Clostridiales; s__unidentified_Clostridiales
ASV_891	0.0	7.0	0.0	11.0	85.0	74.0	d__Bacteria; p__Bacteroidetes; c__Bacteroidia; o__Bacteroidales; f__[Paraprevotellaceae]; g__YRC22; s__unidentified_YRC22
ASV_7212	48.0	46.0	43.0	0.0	0.0	0.0	d__Bacteria; p__Firmicutes; c__Clostridia; o__Clostridiales; f__Ruminococcaceae; g__unclassified_Ruminococcaceae; s__unclassified_Ruminococcaceae
ASV_1791	54.0	81.0	0.0	72.0	12.0	17.0	d__Bacteria; p__Firmicutes; c__Clostridia; o__Clostridiales; f__Ruminococcaceae; g__unidentified_Ruminococcaceae; s__unidentified_Ruminococcaceae
ASV_23321	24.0	14.0	0.0	5.0	14.0	25.0	d__Bacteria; p__Firmicutes; c__Clostridia; o__Clostridiales; f__Ruminococcaceae; g__unidentified_Ruminococcaceae; s__unidentified_Ruminococcaceae
ASV_474	0.0	0.0	0.0	12.0	116.0	129.0	d__Bacteria; p__Firmicutes; c__Clostridia; o__Clostridiales; f__unidentified_Clostridiales; g__unidentified_Clostridiales; s__unidentified_Clostridiales
ASV_17964	37.0	26.0	21.0	45.0	0.0	0.0	d__Bacteria; p__Firmicutes; c__Clostridia; o__Clostridiales; f__Lachnospiraceae; g__Anaerostipes; s__unidentified_Anaerostipes
ASV_19733	0.0	20.0	0.0	32.0	20.0	0.0	d__Bacteria; p__Firmicutes; c__Clostridia; o__Clostridiales; f__Lachnospiraceae; g__unidentified_Lachnospiraceae; s__unidentified_Lachnospiraceae
ASV_2428	18.0	0.0	0.0	101.0	0.0	0.0	d__Bacteria; p__Firmicutes; c__Clostridia; o__Clostridiales; f__Lachnospiraceae; g__[Ruminococcus]; s__[Ruminococcus]_gnavus
ASV_19569	0.0	0.0	0.0	23.0	0.0	0.0	d__Bacteria; p__Actinobacteria; c__Actinobacteria; o__Bifidobacteriales; f__Bifidobacteriaceae; g__Bifidobacterium; s__Bifidobacterium_pseudolongum
ASV_17749	168.0	10.0	0.0	5.0	0.0	23.0	d__Bacteria; p__Bacteroidetes; c__Bacteroidia; o__Bacteroidales; f__Porphyromonadaceae; g__Parabacteroides; s__Parabacteroides_distasonis
ASV_1701	18.0	0.0	0.0	0.0	54.0	0.0	d__Bacteria; p__Firmicutes; c__Clostridia; o__Clostridiales; f__Lachnospiraceae; g__Coprococcus; s__unidentified_Coprococcus
ASV_18048	41.0	0.0	0.0	28.0	43.0	79.0	d__Bacteria; p__Firmicutes; c__Bacilli; o__Lactobacillales; f__Lactobacillaceae; g__Lactobacillus; s__Lactobacillus_paralimentarius
ASV_5153	0.0	0.0	0.0	118.0	26.0	11.0	d__Bacteria; p__Firmicutes; c__Clostridia; o__Clostridiales; f__unidentified_Clostridiales; g__unidentified_Clostridiales; s__unidentified_Clostridiales
ASV_8011	0.0	0.0	0.0	11.0	88.0	88.0	d__Bacteria; p__Proteobacteria; c__Gammaproteobacteria; o__Pseudomonadales; f__Moraxellaceae; g__Acinetobacter; s__unclassified_Acinetobacter
ASV_13273	12.0	0.0	49.0	13.0	10.0	33.0	d__Bacteria; p__Firmicutes; c__Clostridia; o__Clostridiales; f__Ruminococcaceae; g__unidentified_Ruminococcaceae; s__unidentified_Ruminococcaceae
ASV_18607	40.0	33.0	34.0	55.0	7.0	0.0	d__Bacteria; p__Actinobacteria; c__Coriobacteriia; o__Coriobacteriales; f__Coriobacteriaceae; g__Adlercreutzia; s__unidentified_Adlercreutzia
ASV_3268	0.0	0.0	0.0	13.0	154.0	3.0	d__Bacteria; p__Proteobacteria; c__Gammaproteobacteria; o__Xanthomonadales; f__Xanthomonadaceae; g__Rhodanobacter; s__unclassified_Rhodanobacter
ASV_21828	31.0	0.0	0.0	0.0	0.0	0.0	d__Bacteria; p__Firmicutes; c__Clostridia; o__Clostridiales; f__unidentified_Clostridiales; g__unidentified_Clostridiales; s__unidentified_Clostridiales
ASV_12684	16.0	11.0	19.0	47.0	0.0	4.0	d__Bacteria; p__Firmicutes; c__Clostridia; o__Clostridiales; f__Christensenellaceae; g__unidentified_Christensenellaceae; s__unidentified_Christensenellaceae
ASV_7670	21.0	0.0	57.0	27.0	0.0	0.0	d__Bacteria; p__Bacteroidetes; c__Bacteroidia; o__Bacteroidales; f__S24-7; g__unidentified_S24-7; s__unidentified_S24-7
ASV_15572	26.0	0.0	0.0	0.0	56.0	81.0	d__Bacteria; p__Firmicutes; c__Clostridia; o__Clostridiales; f__Lachnospiraceae; g__unclassified_Lachnospiraceae; s__unclassified_Lachnospiraceae
ASV_26053	0.0	0.0	0.0	0.0	26.0	0.0	d__Bacteria; p__Proteobacteria; c__Gammaproteobacteria; o__Enterobacteriales; f__Enterobacteriaceae; g__Plesiomonas; s__unclassified_Plesiomonas
ASV_20740	14.0	15.0	7.0	34.0	55.0	47.0	d__Bacteria; p__Firmicutes; c__Clostridia; o__Clostridiales; f__Ruminococcaceae; g__Oscillospira; s__unidentified_Oscillospira
ASV_9637	0.0	0.0	0.0	27.0	86.0	77.0	d__Bacteria; p__Firmicutes; c__Clostridia; o__Clostridiales; f__Clostridiaceae; g__Proteiniclasticum; s__unidentified_Proteiniclasticum
ASV_353	9.0	9.0	23.0	8.0	50.0	27.0	d__Bacteria; p__Bacteroidetes; c__Bacteroidia; o__Bacteroidales; f__unidentified_Bacteroidales; g__unidentified_Bacteroidales; s__unidentified_Bacteroidales
ASV_10116	0.0	0.0	0.0	21.0	61.0	54.0	d__Bacteria; p__Firmicutes; c__Bacilli; o__Lactobacillales; f__Lactobacillaceae; g__Lactobacillus; s__unclassified_Lactobacillus
ASV_21751	0.0	0.0	0.0	0.0	262.0	0.0	d__Bacteria; p__Proteobacteria; c__Alphaproteobacteria; o__Rhodobacterales; f__Rhodobacteraceae; g__Paracoccus; s__Paracoccus_aminovorans
ASV_2489	86.0	60.0	43.0	0.0	9.0	0.0	d__Bacteria; p__Firmicutes; c__Clostridia; o__Clostridiales; f__Ruminococcaceae; g__Oscillospira; s__unidentified_Oscillospira
ASV_1044	36.0	131.0	0.0	0.0	30.0	0.0	d__Bacteria; p__Firmicutes; c__Clostridia; o__Clostridiales; f__Ruminococcaceae; g__unidentified_Ruminococcaceae; s__unidentified_Ruminococcaceae
ASV_4147	0.0	121.0	0.0	47.0	0.0	0.0	d__Bacteria; p__Firmicutes; c__Bacilli; o__Turicibacterales; f__Turicibacteraceae; g__Turicibacter; s__unidentified_Turicibacter
ASV_5420	39.0	0.0	47.0	3.0	0.0	25.0	d__Bacteria; p__Bacteroidetes; c__Bacteroidia; o__Bacteroidales; f__Bacteroidaceae; g__Bacteroides; s__unidentified_Bacteroides
ASV_10132	0.0	0.0	0.0	22.0	0.0	0.0	d__Bacteria; p__TM7; c__TM7-3; o__CW040; f__F16; g__unidentified_F16; s__unidentified_F16
ASV_14676	0.0	0.0	0.0	9.0	60.0	46.0	d__Bacteria; p__Firmicutes; c__Clostridia; o__Clostridiales; f__Ruminococcaceae; g__unidentified_Ruminococcaceae; s__unidentified_Ruminococcaceae
ASV_24046	99.0	82.0	45.0	10.0	20.0	0.0	d__Bacteria; p__Firmicutes; c__Clostridia; o__Clostridiales; f__unidentified_Clostridiales; g__unidentified_Clostridiales; s__unidentified_Clostridiales
ASV_20639	11.0	47.0	0.0	0.0	0.0	0.0	d__Bacteria; p__Firmicutes; c__Clostridia; o__Clostridiales; f__Lachnospiraceae; g__unidentified_Lachnospiraceae; s__unidentified_Lachnospiraceae
ASV_7150	22.0	31.0	26.0	43.0	0.0	0.0	d__Bacteria; p__Firmicutes; c__Clostridia; o__Clostridiales; f__unidentified_Clostridiales; g__unidentified_Clostridiales; s__unidentified_Clostridiales
ASV_23090	0.0	0.0	0.0	96.0	23.0	0.0	d__Bacteria; p__Firmicutes; c__Clostridia; o__Clostridiales; f__unidentified_Clostridiales; g__unidentified_Clostridiales; s__unidentified_Clostridiales
ASV_22524	180.0	32.0	23.0	0.0	0.0	0.0	d__Bacteria; p__Firmicutes; c__Clostridia; o__Clostridiales; f__Ruminococcaceae; g__Oscillospira; s__unidentified_Oscillospira
ASV_19021	0.0	0.0	0.0	0.0	80.0	0.0	d__Bacteria; p__Firmicutes; c__Clostridia; o__Clostridiales; f__Ruminococcaceae; g__Oscillospira; s__unidentified_Oscillospira
ASV_25260	77.0	5.0	5.0	2.0	1.0	50.0	d__Bacteria; p__Proteobacteria; c__Gammaproteobacteria; o__Pseudomonadales; f__Moraxellaceae; g__Acinetobacter; s__Acinetobacter_johnsonii
ASV_16007	73.0	8.0	3.0	2.0	19.0	30.0	d__Bacteria; p__Proteobacteria; c__Gammaproteobacteria; o__Pseudomonadales; f__Moraxellaceae; g__Acinetobacter; s__Acinetobacter_johnsonii
ASV_23530	0.0	0.0	0.0	45.0	0.0	58.0	d__Bacteria; p__Firmicutes; c__Bacilli; o__Lactobacillales; f__Streptococcaceae; g__Streptococcus; s__Streptococcus_luteciae
ASV_20649	58.0	10.0	14.0	7.0	9.0	44.0	d__Bacteria; p__Proteobacteria; c__Gammaproteobacteria; o__Pseudomonadales; f__Moraxellaceae; g__Acinetobacter; s__unclassified_Acinetobacter
ASV_13726	0.0	0.0	0.0	29.0	86.0	84.0	d__Bacteria; p__Actinobacteria; c__Thermoleophilia; o__Gaiellales; f__Gaiellaceae; g__unidentified_Gaiellaceae; s__unidentified_Gaiellaceae
ASV_21947	29.0	4.0	0.0	18.0	21.0	28.0	d__Bacteria; p__Firmicutes; c__Clostridia; o__Clostridiales; f__Lachnospiraceae; g__Blautia; s__unidentified_Blautia
ASV_25016	62.0	24.0	80.0	0.0	0.0	0.0	d__Bacteria; p__Bacteroidetes; c__Bacteroidia; o__Bacteroidales; f__S24-7; g__unidentified_S24-7; s__unidentified_S24-7
ASV_26448	0.0	13.0	19.0	28.0	38.0	0.0	d__Bacteria; p__Firmicutes; c__Clostridia; o__Clostridiales; f__Lachnospiraceae; g__unidentified_Lachnospiraceae; s__unidentified_Lachnospiraceae
ASV_14426	70.0	27.0	0.0	0.0	34.0	46.0	d__Bacteria; p__Bacteroidetes; c__Bacteroidia; o__Bacteroidales; f__S24-7; g__unidentified_S24-7; s__unidentified_S24-7
ASV_7600	5.0	52.0	19.0	22.0	0.0	0.0	d__Bacteria; p__Firmicutes; c__Clostridia; o__Clostridiales; f__[Mogibacteriaceae]; g__unidentified_[Mogibacteriaceae]; s__unidentified_[Mogibacteriaceae]
ASV_1265	24.0	7.0	36.0	0.0	44.0	71.0	d__Bacteria; p__Bacteroidetes; c__Bacteroidia; o__Bacteroidales; f__unidentified_Bacteroidales; g__unidentified_Bacteroidales; s__unidentified_Bacteroidales
ASV_11575	15.0	39.0	79.0	0.0	0.0	0.0	d__Bacteria; p__Firmicutes; c__Clostridia; o__Clostridiales; f__Ruminococcaceae; g__unidentified_Ruminococcaceae; s__unidentified_Ruminococcaceae
ASV_9189	0.0	0.0	0.0	34.0	85.0	20.0	d__Bacteria; p__Proteobacteria; c__Alphaproteobacteria; o__Rhizobiales; f__Hyphomicrobiaceae; g__Rhodoplanes; s__unidentified_Rhodoplanes
ASV_4830	66.0	42.0	30.0	0.0	0.0	0.0	d__Bacteria; p__Firmicutes; c__Bacilli; o__Lactobacillales; f__Lactobacillaceae; g__Lactobacillus; s__unclassified_Lactobacillus
ASV_24761	0.0	0.0	0.0	37.0	30.0	59.0	d__Bacteria; p__Firmicutes; c__Clostridia; o__Clostridiales; f__Clostridiaceae; g__Clostridium; s__Clostridium_baratii
ASV_21414	39.0	14.0	35.0	0.0	9.0	0.0	d__Bacteria; p__Firmicutes; c__Clostridia; o__Clostridiales; f__Ruminococcaceae; g__Oscillospira; s__unidentified_Oscillospira
ASV_7841	0.0	0.0	0.0	0.0	37.0	0.0	d__Bacteria; p__Proteobacteria; c__Gammaproteobacteria; o__Enterobacteriales; f__Enterobacteriaceae; g__unclassified_Enterobacteriaceae; s__unclassified_Enterobacteriaceae
ASV_9280	0.0	0.0	0.0	0.0	0.0	41.0	d__Bacteria; p__Proteobacteria; c__Alphaproteobacteria; o__Sphingomonadales; f__Sphingomonadaceae; g__Sphingomonas; s__Sphingomonas_yabuuchiae
ASV_10937	29.0	0.0	0.0	0.0	17.0	34.0	d__Bacteria; p__Firmicutes; c__Clostridia; o__Clostridiales; f__Lachnospiraceae; g__unidentified_Lachnospiraceae; s__unidentified_Lachnospiraceae
ASV_3382	67.0	36.0	45.0	0.0	8.0	0.0	d__Bacteria; p__Bacteroidetes; c__Bacteroidia; o__Bacteroidales; f__S24-7; g__unidentified_S24-7; s__unidentified_S24-7
ASV_7073	0.0	0.0	0.0	12.0	0.0	0.0	d__Bacteria; p__Actinobacteria; c__Actinobacteria; o__Bifidobacteriales; f__Bifidobacteriaceae; g__Bifidobacterium; s__Bifidobacterium_pseudolongum
ASV_19678	120.0	12.0	154.0	0.0	0.0	0.0	d__Bacteria; p__Firmicutes; c__Clostridia; o__Clostridiales; f__Lachnospiraceae; g__unidentified_Lachnospiraceae; s__unidentified_Lachnospiraceae
ASV_7568	33.0	0.0	0.0	30.0	0.0	43.0	d__Bacteria; p__Firmicutes; c__Bacilli; o__Lactobacillales; f__Lactobacillaceae; g__Lactobacillus; s__unclassified_Lactobacillus
ASV_1768	0.0	0.0	0.0	0.0	16.0	0.0	d__Bacteria; p__Proteobacteria; c__Gammaproteobacteria; o__Enterobacteriales; f__Enterobacteriaceae; g__Plesiomonas; s__unclassified_Plesiomonas
ASV_16174	0.0	0.0	0.0	25.0	0.0	97.0	d__Bacteria; p__Bacteroidetes; c__Bacteroidia; o__Bacteroidales; f__unidentified_Bacteroidales; g__unidentified_Bacteroidales; s__unidentified_Bacteroidales
ASV_22858	26.0	0.0	0.0	9.0	0.0	10.0	d__Bacteria; p__Firmicutes; c__Clostridia; o__Clostridiales; f__Ruminococcaceae; g__unidentified_Ruminococcaceae; s__unidentified_Ruminococcaceae
ASV_6117	0.0	0.0	0.0	0.0	62.0	0.0	d__Bacteria; p__Firmicutes; c__Clostridia; o__Clostridiales; f__unidentified_Clostridiales; g__unidentified_Clostridiales; s__unidentified_Clostridiales
ASV_10130	8.0	0.0	8.0	16.0	31.0	87.0	d__Bacteria; p__Proteobacteria; c__Gammaproteobacteria; o__Aeromonadales; f__Succinivibrionaceae; g__Succinivibrio; s__unidentified_Succinivibrio
ASV_22281	22.0	0.0	26.0	0.0	0.0	12.0	d__Bacteria; p__Firmicutes; c__Clostridia; o__Clostridiales; f__Lachnospiraceae; g__unclassified_Lachnospiraceae; s__unclassified_Lachnospiraceae
ASV_14115	0.0	0.0	0.0	20.0	0.0	0.0	d__Bacteria; p__Firmicutes; c__Clostridia; o__Clostridiales; f__Lachnospiraceae; g__unclassified_Lachnospiraceae; s__unclassified_Lachnospiraceae
ASV_25259	0.0	0.0	0.0	128.0	0.0	0.0	d__Bacteria; p__Firmicutes; c__Clostridia; o__Clostridiales; f__unidentified_Clostridiales; g__unidentified_Clostridiales; s__unidentified_Clostridiales
ASV_19855	24.0	14.0	33.0	12.0	0.0	52.0	d__Bacteria; p__Firmicutes; c__Clostridia; o__Clostridiales; f__Ruminococcaceae; g__unidentified_Ruminococcaceae; s__unidentified_Ruminococcaceae
ASV_23079	9.0	0.0	122.0	0.0	0.0	0.0	d__Bacteria; p__Firmicutes; c__Clostridia; o__Clostridiales; f__Lachnospiraceae; g__unidentified_Lachnospiraceae; s__unidentified_Lachnospiraceae
ASV_4628	37.0	0.0	20.0	13.0	28.0	0.0	d__Bacteria; p__Firmicutes; c__Clostridia; o__Clostridiales; f__Ruminococcaceae; g__Oscillospira; s__unidentified_Oscillospira
ASV_18392	0.0	0.0	0.0	42.0	0.0	0.0	d__Bacteria; p__Firmicutes; c__Bacilli; o__Lactobacillales; f__Lactobacillaceae; g__Lactobacillus; s__Lactobacillus_vaginalis
ASV_17878	0.0	0.0	0.0	16.0	52.0	24.0	d__Bacteria; p__Firmicutes; c__Clostridia; o__Clostridiales; f__Ruminococcaceae; g__unidentified_Ruminococcaceae; s__unidentified_Ruminococcaceae
ASV_5836	89.0	38.0	47.0	0.0	0.0	39.0	d__Bacteria; p__Bacteroidetes; c__Bacteroidia; o__Bacteroidales; f__S24-7; g__unidentified_S24-7; s__unidentified_S24-7
ASV_10660	0.0	0.0	0.0	0.0	0.0	27.0	d__Bacteria; p__Bacteroidetes; c__Bacteroidia; o__Bacteroidales; f__S24-7; g__unidentified_S24-7; s__unidentified_S24-7
ASV_19800	16.0	0.0	0.0	20.0	0.0	48.0	d__Bacteria; p__Firmicutes; c__Clostridia; o__Clostridiales; f__Lachnospiraceae; g__unclassified_Lachnospiraceae; s__unclassified_Lachnospiraceae
ASV_7115	23.0	33.0	46.0	0.0	0.0	0.0	d__Bacteria; p__Bacteroidetes; c__Bacteroidia; o__Bacteroidales; f__Rikenellaceae; g__unidentified_Rikenellaceae; s__unidentified_Rikenellaceae
ASV_19922	38.0	81.0	0.0	0.0	0.0	0.0	d__Bacteria; p__Bacteroidetes; c__Bacteroidia; o__Bacteroidales; f__S24-7; g__unidentified_S24-7; s__unidentified_S24-7
ASV_4209	16.0	0.0	0.0	10.0	0.0	5.0	d__Bacteria; p__Firmicutes; c__Clostridia; o__Clostridiales; f__Ruminococcaceae; g__Oscillospira; s__unidentified_Oscillospira
ASV_13156	45.0	0.0	0.0	0.0	34.0	74.0	d__Bacteria; p__Firmicutes; c__Clostridia; o__Clostridiales; f__Ruminococcaceae; g__Oscillospira; s__unidentified_Oscillospira
ASV_9927	53.0	19.0	0.0	8.0	19.0	18.0	d__Bacteria; p__Firmicutes; c__Clostridia; o__Clostridiales; f__unidentified_Clostridiales; g__unidentified_Clostridiales; s__unidentified_Clostridiales
ASV_22608	0.0	0.0	50.0	0.0	0.0	115.0	d__Bacteria; p__Bacteroidetes; c__Bacteroidia; o__Bacteroidales; f__Bacteroidaceae; g__Bacteroides; s__unidentified_Bacteroides
ASV_5801	0.0	0.0	0.0	33.0	0.0	0.0	d__Bacteria; p__Firmicutes; c__Clostridia; o__Clostridiales; f__Clostridiaceae; g__SMB53; s__unidentified_SMB53
ASV_17872	0.0	0.0	0.0	14.0	67.0	60.0	d__Bacteria; p__Proteobacteria; c__Gammaproteobacteria; o__Xanthomonadales; f__Xanthomonadaceae; g__unidentified_Xanthomonadaceae; s__unidentified_Xanthomonadaceae
ASV_204	57.0	15.0	0.0	32.0	0.0	60.0	d__Bacteria; p__Firmicutes; c__Bacilli; o__Lactobacillales; f__Lactobacillaceae; g__unclassified_Lactobacillaceae; s__unclassified_Lactobacillaceae
ASV_27	0.0	0.0	0.0	0.0	0.0	13.0	d__Bacteria; p__Bacteroidetes; c__Bacteroidia; o__Bacteroidales; f__S24-7; g__unidentified_S24-7; s__unidentified_S24-7
ASV_145	54.0	33.0	119.0	0.0	0.0	7.0	d__Bacteria; p__Firmicutes; c__Clostridia; o__Clostridiales; f__Ruminococcaceae; g__Oscillospira; s__unidentified_Oscillospira
ASV_23575	39.0	23.0	22.0	5.0	37.0	0.0	d__Bacteria; p__Firmicutes; c__Clostridia; o__Clostridiales; f__Ruminococcaceae; g__Oscillospira; s__unidentified_Oscillospira
ASV_10865	26.0	0.0	0.0	32.0	28.0	0.0	d__Bacteria; p__Firmicutes; c__Clostridia; o__Clostridiales; f__Ruminococcaceae; g__Oscillospira; s__unidentified_Oscillospira
ASV_7314	10.0	0.0	0.0	0.0	12.0	96.0	d__Bacteria; p__Spirochaetes; c__Spirochaetes; o__Spirochaetales; f__Spirochaetaceae; g__Treponema; s__unidentified_Treponema
ASV_23018	22.0	44.0	25.0	0.0	0.0	0.0	d__Bacteria; p__Firmicutes; c__Clostridia; o__Clostridiales; f__Ruminococcaceae; g__Oscillospira; s__unidentified_Oscillospira
ASV_25463	163.0	0.0	66.0	0.0	0.0	0.0	d__Bacteria; p__Firmicutes; c__Clostridia; o__Clostridiales; f__Ruminococcaceae; g__Ruminococcus; s__unidentified_Ruminococcus
ASV_8903	0.0	0.0	0.0	14.0	24.0	79.0	d__Bacteria; p__Proteobacteria; c__Gammaproteobacteria; o__Xanthomonadales; f__Xanthomonadaceae; g__unidentified_Xanthomonadaceae; s__unidentified_Xanthomonadaceae
ASV_2362	6.0	0.0	12.0	15.0	27.0	66.0	d__Bacteria; p__Firmicutes; c__Clostridia; o__Clostridiales; f__Ruminococcaceae; g__unidentified_Ruminococcaceae; s__unidentified_Ruminococcaceae
ASV_10856	0.0	0.0	0.0	58.0	10.0	33.0	d__Bacteria; p__Proteobacteria; c__Gammaproteobacteria; o__Xanthomonadales; f__Xanthomonadaceae; g__Rhodanobacter; s__unclassified_Rhodanobacter
ASV_23070	0.0	0.0	0.0	0.0	107.0	0.0	d__Bacteria; p__Proteobacteria; c__Gammaproteobacteria; o__Enterobacteriales; f__Enterobacteriaceae; g__Plesiomonas; s__unclassified_Plesiomonas
ASV_3741	0.0	0.0	0.0	41.0	8.0	44.0	d__Bacteria; p__Firmicutes; c__Clostridia; o__Clostridiales; f__[Mogibacteriaceae]; g__unidentified_[Mogibacteriaceae]; s__unidentified_[Mogibacteriaceae]
ASV_21931	0.0	0.0	8.0	108.0	7.0	40.0	d__Bacteria; p__Firmicutes; c__Clostridia; o__Clostridiales; f__unidentified_Clostridiales; g__unidentified_Clostridiales; s__unidentified_Clostridiales
ASV_18600	0.0	49.0	0.0	4.0	0.0	0.0	d__Bacteria; p__Firmicutes; c__Clostridia; o__Clostridiales; f__unidentified_Clostridiales; g__unidentified_Clostridiales; s__unidentified_Clostridiales
ASV_22857	111.0	0.0	91.0	0.0	0.0	0.0	d__Bacteria; p__Bacteroidetes; c__Bacteroidia; o__Bacteroidales; f__S24-7; g__unidentified_S24-7; s__unidentified_S24-7
ASV_12347	5.0	18.0	24.0	0.0	20.0	40.0	d__Bacteria; p__Firmicutes; c__Clostridia; o__Clostridiales; f__Ruminococcaceae; g__Oscillospira; s__unidentified_Oscillospira
ASV_7659	3.0	0.0	24.0	10.0	0.0	86.0	d__Bacteria; p__Nitrospirae; c__Nitrospira; o__Nitrospirales; f__[Thermodesulfovibrionaceae]; g__DCE29; s__unidentified_DCE29
ASV_17924	10.0	4.0	10.0	19.0	14.0	0.0	d__Bacteria; p__Firmicutes; c__Clostridia; o__Clostridiales; f__unidentified_Clostridiales; g__unidentified_Clostridiales; s__unidentified_Clostridiales
ASV_8341	0.0	18.0	13.0	22.0	41.0	25.0	d__Bacteria; p__Proteobacteria; c__Alphaproteobacteria; o__Rhizobiales; f__unclassified_Rhizobiales; g__unclassified_Rhizobiales; s__unclassified_Rhizobiales
ASV_10644	0.0	0.0	18.0	0.0	0.0	0.0	d__Bacteria; p__Firmicutes; c__Clostridia; o__Clostridiales; f__[Mogibacteriaceae]; g__unidentified_[Mogibacteriaceae]; s__unidentified_[Mogibacteriaceae]
ASV_3027	0.0	0.0	219.0	0.0	0.0	0.0	d__Bacteria; p__Actinobacteria; c__Actinobacteria; o__Actinomycetales; f__Mycobacteriaceae; g__Mycobacterium; s__unidentified_Mycobacterium
ASV_1527	65.0	0.0	0.0	14.0	0.0	109.0	d__Bacteria; p__Firmicutes; c__Clostridia; o__Clostridiales; f__Ruminococcaceae; g__Ruminococcus; s__unidentified_Ruminococcus
ASV_19372	0.0	0.0	0.0	0.0	0.0	11.0	d__Bacteria; p__Firmicutes; c__Clostridia; o__Clostridiales; f__Ruminococcaceae; g__unidentified_Ruminococcaceae; s__unidentified_Ruminococcaceae
ASV_14133	160.0	0.0	0.0	35.0	0.0	0.0	d__Bacteria; p__Firmicutes; c__Clostridia; o__Clostridiales; f__Lachnospiraceae; g__unclassified_Lachnospiraceae; s__unclassified_Lachnospiraceae
ASV_25049	133.0	17.0	0.0	6.0	9.0	0.0	d__Bacteria; p__Firmicutes; c__Clostridia; o__Clostridiales; f__unidentified_Clostridiales; g__unidentified_Clostridiales; s__unidentified_Clostridiales
ASV_12023	0.0	0.0	0.0	87.0	0.0	0.0	d__Bacteria; p__Firmicutes; c__Clostridia; o__Clostridiales; f__unclassified_Clostridiales; g__unclassified_Clostridiales; s__unclassified_Clostridiales
ASV_4452	95.0	14.0	113.0	0.0	8.0	0.0	d__Bacteria; p__Firmicutes; c__Clostridia; o__Clostridiales; f__Lachnospiraceae; g__unclassified_Lachnospiraceae; s__unclassified_Lachnospiraceae
ASV_6671	0.0	0.0	0.0	60.0	0.0	0.0	d__Bacteria; p__Firmicutes; c__Clostridia; o__Clostridiales; f__unidentified_Clostridiales; g__unidentified_Clostridiales; s__unidentified_Clostridiales
ASV_13055	0.0	0.0	0.0	8.0	0.0	19.0	d__Bacteria; p__Firmicutes; c__Clostridia; o__Clostridiales; f__Lachnospiraceae; g__unidentified_Lachnospiraceae; s__unidentified_Lachnospiraceae
ASV_17376	37.0	0.0	0.0	0.0	0.0	19.0	d__Bacteria; p__Firmicutes; c__Clostridia; o__Clostridiales; f__unidentified_Clostridiales; g__unidentified_Clostridiales; s__unidentified_Clostridiales
ASV_6027	16.0	41.0	25.0	0.0	0.0	0.0	d__Bacteria; p__Firmicutes; c__Clostridia; o__Clostridiales; f__Ruminococcaceae; g__unidentified_Ruminococcaceae; s__unidentified_Ruminococcaceae
ASV_24639	53.0	10.0	36.0	0.0	5.0	0.0	d__Bacteria; p__Firmicutes; c__Clostridia; o__Clostridiales; f__Ruminococcaceae; g__unidentified_Ruminococcaceae; s__unidentified_Ruminococcaceae
ASV_26350	14.0	0.0	14.0	2.0	0.0	83.0	d__Bacteria; p__Bacteroidetes; c__Bacteroidia; o__Bacteroidales; f__Prevotellaceae; g__Prevotella; s__unidentified_Prevotella
ASV_8786	33.0	15.0	49.0	4.0	0.0	0.0	d__Bacteria; p__Firmicutes; c__Clostridia; o__Clostridiales; f__Ruminococcaceae; g__Oscillospira; s__unidentified_Oscillospira
ASV_11628	105.0	43.0	57.0	0.0	0.0	0.0	d__Bacteria; p__Firmicutes; c__Clostridia; o__Clostridiales; f__Ruminococcaceae; g__unidentified_Ruminococcaceae; s__unidentified_Ruminococcaceae
ASV_25546	0.0	0.0	0.0	45.0	53.0	26.0	d__Bacteria; p__Actinobacteria; c__Actinobacteria; o__Actinomycetales; f__Mycobacteriaceae; g__Mycobacterium; s__unidentified_Mycobacterium
ASV_15516	5.0	73.0	0.0	35.0	0.0	0.0	d__Bacteria; p__Firmicutes; c__Clostridia; o__Clostridiales; f__unidentified_Clostridiales; g__unidentified_Clostridiales; s__unidentified_Clostridiales
ASV_4526	4.0	0.0	0.0	8.0	13.0	13.0	d__Bacteria; p__Firmicutes; c__Clostridia; o__Clostridiales; f__Lachnospiraceae; g__unidentified_Lachnospiraceae; s__unidentified_Lachnospiraceae
ASV_5122	140.0	53.0	2.0	0.0	0.0	0.0	d__Bacteria; p__Firmicutes; c__Clostridia; o__Clostridiales; f__Ruminococcaceae; g__Oscillospira; s__unidentified_Oscillospira
ASV_11631	110.0	35.0	62.0	9.0	0.0	0.0	d__Bacteria; p__Firmicutes; c__Clostridia; o__Clostridiales; f__Lachnospiraceae; g__unidentified_Lachnospiraceae; s__unidentified_Lachnospiraceae
ASV_22776	77.0	11.0	19.0	0.0	0.0	9.0	d__Bacteria; p__Bacteroidetes; c__Bacteroidia; o__Bacteroidales; f__Porphyromonadaceae; g__Parabacteroides; s__Parabacteroides_distasonis
ASV_10423	0.0	0.0	17.0	7.0	8.0	43.0	d__Bacteria; p__Firmicutes; c__Clostridia; o__Clostridiales; f__Lachnospiraceae; g__unclassified_Lachnospiraceae; s__unclassified_Lachnospiraceae
ASV_9554	5.0	0.0	0.0	2.0	23.0	0.0	d__Bacteria; p__Bacteroidetes; c__Bacteroidia; o__Bacteroidales; f__Rikenellaceae; g__Alistipes; s__Alistipes_massiliensis
ASV_3797	0.0	10.0	16.0	20.0	0.0	44.0	d__Bacteria; p__Bacteroidetes; c__Bacteroidia; o__Bacteroidales; f__unidentified_Bacteroidales; g__unidentified_Bacteroidales; s__unidentified_Bacteroidales
ASV_6260	0.0	14.0	0.0	11.0	0.0	0.0	d__Bacteria; p__Firmicutes; c__Clostridia; o__Clostridiales; f__Ruminococcaceae; g__unidentified_Ruminococcaceae; s__unidentified_Ruminococcaceae
ASV_9079	11.0	48.0	25.0	42.0	7.0	0.0	d__Bacteria; p__Firmicutes; c__Clostridia; o__Clostridiales; f__unidentified_Clostridiales; g__unidentified_Clostridiales; s__unidentified_Clostridiales
ASV_22354	22.0	0.0	0.0	0.0	0.0	0.0	d__Bacteria; p__TM7; c__TM7-3; o__CW040; f__F16; g__unidentified_F16; s__unidentified_F16
ASV_22164	0.0	0.0	0.0	46.0	0.0	27.0	d__Bacteria; p__Firmicutes; c__Bacilli; o__Lactobacillales; f__Lactobacillaceae; g__unclassified_Lactobacillaceae; s__unclassified_Lactobacillaceae
ASV_17869	33.0	0.0	102.0	38.0	12.0	0.0	d__Bacteria; p__Bacteroidetes; c__Bacteroidia; o__Bacteroidales; f__S24-7; g__unidentified_S24-7; s__unidentified_S24-7
ASV_21500	0.0	0.0	0.0	36.0	65.0	41.0	d__Bacteria; p__Proteobacteria; c__Gammaproteobacteria; o__Pseudomonadales; f__Moraxellaceae; g__Psychrobacter; s__unidentified_Psychrobacter
ASV_20407	0.0	41.0	0.0	0.0	23.0	59.0	d__Bacteria; p__Firmicutes; c__Bacilli; o__Lactobacillales; f__Lactobacillaceae; g__Lactobacillus; s__Lactobacillus_delbrueckii
ASV_25329	27.0	14.0	0.0	5.0	25.0	32.0	d__Bacteria; p__Firmicutes; c__Clostridia; o__Clostridiales; f__Ruminococcaceae; g__Oscillospira; s__unclassified_Oscillospira
ASV_4183	0.0	0.0	0.0	19.0	9.0	62.0	d__Bacteria; p__Actinobacteria; c__Actinobacteria; o__Actinomycetales; f__Streptomycetaceae; g__unclassified_Streptomycetaceae; s__unclassified_Streptomycetaceae
ASV_21851	43.0	4.0	26.0	18.0	10.0	11.0	d__Bacteria; p__Firmicutes; c__Clostridia; o__Clostridiales; f__unclassified_Clostridiales; g__unclassified_Clostridiales; s__unclassified_Clostridiales
ASV_396	0.0	0.0	0.0	32.0	0.0	32.0	d__Bacteria; p__Firmicutes; c__Clostridia; o__Clostridiales; f__Ruminococcaceae; g__Oscillospira; s__unidentified_Oscillospira
ASV_5612	0.0	0.0	0.0	56.0	9.0	9.0	d__Bacteria; p__Firmicutes; c__Clostridia; o__Clostridiales; f__unidentified_Clostridiales; g__unidentified_Clostridiales; s__unidentified_Clostridiales
ASV_22935	0.0	0.0	0.0	31.0	73.0	50.0	d__Bacteria; p__Proteobacteria; c__Epsilonproteobacteria; o__Campylobacterales; f__Campylobacteraceae; g__Arcobacter; s__unidentified_Arcobacter
ASV_17191	0.0	0.0	0.0	0.0	50.0	83.0	d__Bacteria; p__Actinobacteria; c__Actinobacteria; o__Actinomycetales; f__unclassified_Actinomycetales; g__unclassified_Actinomycetales; s__unclassified_Actinomycetales
ASV_5056	0.0	0.0	0.0	6.0	0.0	83.0	d__Bacteria; p__Firmicutes; c__Clostridia; o__Clostridiales; f__Ruminococcaceae; g__unidentified_Ruminococcaceae; s__unidentified_Ruminococcaceae
ASV_3292	24.0	0.0	31.0	8.0	39.0	0.0	d__Bacteria; p__Firmicutes; c__Clostridia; o__Clostridiales; f__Christensenellaceae; g__unidentified_Christensenellaceae; s__unidentified_Christensenellaceae
ASV_8637	0.0	6.0	20.0	23.0	3.0	0.0	d__Bacteria; p__Firmicutes; c__Clostridia; o__Clostridiales; f__Ruminococcaceae; g__unidentified_Ruminococcaceae; s__unidentified_Ruminococcaceae
ASV_4455	0.0	0.0	0.0	31.0	5.0	39.0	d__Bacteria; p__Bacteroidetes; c__Bacteroidia; o__Bacteroidales; f__S24-7; g__unidentified_S24-7; s__unidentified_S24-7
ASV_14605	13.0	0.0	229.0	0.0	0.0	0.0	d__Bacteria; p__Bacteroidetes; c__Bacteroidia; o__Bacteroidales; f__S24-7; g__unidentified_S24-7; s__unidentified_S24-7
ASV_4607	66.0	12.0	13.0	9.0	5.0	0.0	d__Bacteria; p__Firmicutes; c__Clostridia; o__Clostridiales; f__Christensenellaceae; g__Christensenella; s__unidentified_Christensenella
ASV_20128	14.0	0.0	10.0	13.0	29.0	8.0	d__Bacteria; p__Proteobacteria; c__Betaproteobacteria; o__Burkholderiales; f__Comamonadaceae; g__unclassified_Comamonadaceae; s__unclassified_Comamonadaceae
ASV_15041	58.0	0.0	0.0	6.0	0.0	17.0	d__Bacteria; p__Bacteroidetes; c__Bacteroidia; o__Bacteroidales; f__Porphyromonadaceae; g__Parabacteroides; s__Parabacteroides_distasonis
ASV_10306	0.0	0.0	0.0	23.0	0.0	22.0	d__Bacteria; p__Bacteroidetes; c__Bacteroidia; o__Bacteroidales; f__Bacteroidaceae; g__Bacteroides; s__Bacteroides_acidifaciens
ASV_12696	0.0	21.0	19.0	3.0	48.0	12.0	d__Bacteria; p__Firmicutes; c__Clostridia; o__Clostridiales; f__Ruminococcaceae; g__unidentified_Ruminococcaceae; s__unidentified_Ruminococcaceae
ASV_14581	0.0	0.0	0.0	27.0	93.0	14.0	d__Bacteria; p__Proteobacteria; c__Betaproteobacteria; o__Burkholderiales; f__Burkholderiaceae; g__Burkholderia; s__unidentified_Burkholderia
ASV_8490	0.0	0.0	30.0	0.0	23.0	91.0	d__Bacteria; p__Proteobacteria; c__Betaproteobacteria; o__Burkholderiales; f__Comamonadaceae; g__Tepidimonas; s__unidentified_Tepidimonas
ASV_1808	0.0	0.0	0.0	37.0	0.0	0.0	d__Bacteria; p__Firmicutes; c__Bacilli; o__Lactobacillales; f__Lactobacillaceae; g__Lactobacillus; s__unclassified_Lactobacillus
ASV_23487	103.0	27.0	23.0	5.0	0.0	7.0	d__Bacteria; p__Firmicutes; c__Clostridia; o__Clostridiales; f__Ruminococcaceae; g__unidentified_Ruminococcaceae; s__unidentified_Ruminococcaceae
ASV_14174	0.0	78.0	0.0	12.0	0.0	0.0	d__Bacteria; p__Proteobacteria; c__Alphaproteobacteria; o__Rhodospirillales; f__Rhodospirillaceae; g__Reyranella; s__Reyranella_massiliensis
ASV_449	19.0	0.0	14.0	17.0	11.0	16.0	d__Bacteria; p__Firmicutes; c__Clostridia; o__Clostridiales; f__Lachnospiraceae; g__unidentified_Lachnospiraceae; s__unidentified_Lachnospiraceae
ASV_4716	117.0	0.0	70.0	0.0	3.0	0.0	d__Bacteria; p__Bacteroidetes; c__Bacteroidia; o__Bacteroidales; f__S24-7; g__unidentified_S24-7; s__unidentified_S24-7
ASV_19285	81.0	0.0	21.0	0.0	0.0	0.0	d__Bacteria; p__Bacteroidetes; c__Bacteroidia; o__Bacteroidales; f__Porphyromonadaceae; g__Parabacteroides; s__Parabacteroides_distasonis
ASV_19583	53.0	0.0	18.0	47.0	0.0	0.0	d__Bacteria; p__Firmicutes; c__Clostridia; o__Clostridiales; f__Lachnospiraceae; g__Blautia; s__unidentified_Blautia
ASV_6139	0.0	0.0	0.0	50.0	0.0	65.0	d__Bacteria; p__Chloroflexi; c__Thermomicrobia; o__unidentified_Thermomicrobia; f__unidentified_Thermomicrobia; g__unidentified_Thermomicrobia; s__unidentified_Thermomicrobia
ASV_8681	0.0	0.0	0.0	0.0	0.0	70.0	d__Bacteria; p__Actinobacteria; c__Actinobacteria; o__Actinomycetales; f__Microbacteriaceae; g__Salinibacterium; s__unidentified_Salinibacterium
ASV_15157	8.0	7.0	0.0	8.0	55.0	28.0	d__Bacteria; p__Bacteroidetes; c__Bacteroidia; o__Bacteroidales; f__unidentified_Bacteroidales; g__unidentified_Bacteroidales; s__unidentified_Bacteroidales
ASV_25712	27.0	20.0	13.0	16.0	10.0	14.0	d__Bacteria; p__Firmicutes; c__Clostridia; o__Clostridiales; f__unidentified_Clostridiales; g__unidentified_Clostridiales; s__unidentified_Clostridiales
ASV_972	15.0	5.0	0.0	12.0	31.0	0.0	d__Bacteria; p__Firmicutes; c__Clostridia; o__Clostridiales; f__unidentified_Clostridiales; g__unidentified_Clostridiales; s__unidentified_Clostridiales
ASV_22232	0.0	3.0	73.0	23.0	13.0	0.0	d__Bacteria; p__Firmicutes; c__Clostridia; o__Clostridiales; f__unclassified_Clostridiales; g__unclassified_Clostridiales; s__unclassified_Clostridiales
ASV_7748	0.0	0.0	16.0	12.0	19.0	32.0	d__Bacteria; p__Bacteroidetes; c__Bacteroidia; o__Bacteroidales; f__unidentified_Bacteroidales; g__unidentified_Bacteroidales; s__unidentified_Bacteroidales
ASV_10219	26.0	37.0	42.0	7.0	0.0	0.0	d__Bacteria; p__Bacteroidetes; c__Bacteroidia; o__Bacteroidales; f__S24-7; g__unidentified_S24-7; s__unidentified_S24-7
ASV_1456	32.0	0.0	0.0	0.0	23.0	0.0	d__Bacteria; p__Proteobacteria; c__Gammaproteobacteria; o__Enterobacteriales; f__Enterobacteriaceae; g__Shigella; s__unclassified_Shigella
ASV_22165	0.0	38.0	0.0	61.0	24.0	0.0	d__Bacteria; p__Firmicutes; c__Clostridia; o__Clostridiales; f__unidentified_Clostridiales; g__unidentified_Clostridiales; s__unidentified_Clostridiales
ASV_20620	0.0	7.0	0.0	0.0	46.0	42.0	d__Bacteria; p__Firmicutes; c__Clostridia; o__Clostridiales; f__Veillonellaceae; g__Phascolarctobacterium; s__unidentified_Phascolarctobacterium
ASV_18259	9.0	0.0	0.0	0.0	39.0	33.0	d__Bacteria; p__Firmicutes; c__Clostridia; o__Clostridiales; f__Christensenellaceae; g__unidentified_Christensenellaceae; s__unidentified_Christensenellaceae
ASV_3255	0.0	47.0	0.0	0.0	33.0	0.0	d__Bacteria; p__Firmicutes; c__Clostridia; o__Clostridiales; f__Ruminococcaceae; g__Ruminococcus; s__unidentified_Ruminococcus
ASV_10506	22.0	31.0	130.0	0.0	0.0	0.0	d__Bacteria; p__Firmicutes; c__Clostridia; o__Clostridiales; f__Ruminococcaceae; g__Oscillospira; s__unidentified_Oscillospira
ASV_9534	165.0	0.0	0.0	0.0	0.0	0.0	d__Bacteria; p__Tenericutes; c__Mollicutes; o__RF39; f__unidentified_RF39; g__unidentified_RF39; s__unidentified_RF39
ASV_19288	0.0	16.0	0.0	0.0	0.0	8.0	d__Bacteria; p__Firmicutes; c__Bacilli; o__Bacillales; f__Paenibacillaceae; g__Cohnella; s__unidentified_Cohnella
ASV_12662	0.0	0.0	0.0	47.0	33.0	41.0	d__Bacteria; p__Bacteroidetes; c__Bacteroidia; o__Bacteroidales; f__S24-7; g__unidentified_S24-7; s__unidentified_S24-7
ASV_23863	0.0	0.0	0.0	36.0	0.0	22.0	d__Bacteria; p__Firmicutes; c__Clostridia; o__Clostridiales; f__Clostridiaceae; g__Clostridium; s__Clostridium_baratii
ASV_7760	39.0	36.0	21.0	0.0	19.0	0.0	d__Bacteria; p__Firmicutes; c__Clostridia; o__Clostridiales; f__Ruminococcaceae; g__Oscillospira; s__unidentified_Oscillospira
ASV_12782	50.0	13.0	56.0	0.0	0.0	30.0	d__Bacteria; p__Bacteroidetes; c__Bacteroidia; o__Bacteroidales; f__[Odoribacteraceae]; g__Butyricimonas; s__unidentified_Butyricimonas
ASV_10811	27.0	15.0	0.0	0.0	0.0	0.0	d__Bacteria; p__Firmicutes; c__Clostridia; o__Clostridiales; f__unidentified_Clostridiales; g__unidentified_Clostridiales; s__unidentified_Clostridiales
ASV_13002	0.0	0.0	0.0	99.0	0.0	0.0	d__Bacteria; p__Firmicutes; c__Clostridia; o__Clostridiales; f__Ruminococcaceae; g__Ruminococcus; s__Ruminococcus_callidus
ASV_2583	45.0	21.0	10.0	0.0	0.0	0.0	d__Bacteria; p__Firmicutes; c__Bacilli; o__Lactobacillales; f__Leuconostocaceae; g__Leuconostoc; s__Leuconostoc_mesenteroides
ASV_2660	0.0	14.0	0.0	3.0	30.0	0.0	d__Bacteria; p__Bacteroidetes; c__Bacteroidia; o__Bacteroidales; f__BS11; g__unidentified_BS11; s__unidentified_BS11
ASV_11114	0.0	0.0	0.0	0.0	13.0	0.0	d__Bacteria; p__Tenericutes; c__Mollicutes; o__Anaeroplasmatales; f__Anaeroplasmataceae; g__Anaeroplasma; s__unidentified_Anaeroplasma
ASV_25131	0.0	0.0	0.0	44.0	0.0	25.0	d__Bacteria; p__Firmicutes; c__Clostridia; o__Clostridiales; f__Clostridiaceae; g__unidentified_Clostridiaceae; s__unidentified_Clostridiaceae
ASV_10831	0.0	0.0	0.0	0.0	0.0	138.0	d__Bacteria; p__Actinobacteria; c__Thermoleophilia; o__Gaiellales; f__Gaiellaceae; g__unidentified_Gaiellaceae; s__unidentified_Gaiellaceae
ASV_7409	0.0	0.0	12.0	0.0	0.0	0.0	d__Bacteria; p__Firmicutes; c__Clostridia; o__Clostridiales; f__unidentified_Clostridiales; g__unidentified_Clostridiales; s__unidentified_Clostridiales
ASV_3167	0.0	0.0	0.0	42.0	0.0	81.0	d__Bacteria; p__Bacteroidetes; c__Flavobacteriia; o__Flavobacteriales; f__Flavobacteriaceae; g__Flavobacterium; s__Flavobacterium_frigidarium
ASV_9738	5.0	16.0	0.0	0.0	27.0	9.0	d__Bacteria; p__Firmicutes; c__Clostridia; o__Clostridiales; f__Ruminococcaceae; g__unidentified_Ruminococcaceae; s__unidentified_Ruminococcaceae
ASV_25181	13.0	86.0	0.0	0.0	0.0	0.0	d__Bacteria; p__Firmicutes; c__Clostridia; o__Clostridiales; f__Ruminococcaceae; g__Oscillospira; s__unidentified_Oscillospira
ASV_9169	0.0	127.0	0.0	0.0	0.0	0.0	d__Bacteria; p__Firmicutes; c__Clostridia; o__Clostridiales; f__unidentified_Clostridiales; g__unidentified_Clostridiales; s__unidentified_Clostridiales
ASV_13639	0.0	0.0	0.0	25.0	94.0	23.0	d__Bacteria; p__Acidobacteria; c__Solibacteres; o__Solibacterales; f__Solibacteraceae; g__unidentified_Solibacteraceae; s__unidentified_Solibacteraceae
ASV_25340	39.0	80.0	68.0	0.0	0.0	0.0	d__Bacteria; p__Firmicutes; c__Clostridia; o__Clostridiales; f__Ruminococcaceae; g__Oscillospira; s__unidentified_Oscillospira
ASV_1347	0.0	0.0	0.0	0.0	11.0	0.0	d__Bacteria; p__Firmicutes; c__Clostridia; o__Clostridiales; f__Ruminococcaceae; g__Oscillospira; s__unidentified_Oscillospira
ASV_26312	0.0	0.0	0.0	31.0	0.0	38.0	d__Bacteria; p__Firmicutes; c__Clostridia; o__Clostridiales; f__Clostridiaceae; g__unidentified_Clostridiaceae; s__unidentified_Clostridiaceae
ASV_18968	11.0	81.0	14.0	8.0	0.0	20.0	d__Bacteria; p__Proteobacteria; c__Alphaproteobacteria; o__Sphingomonadales; f__Sphingomonadaceae; g__Sphingobium; s__unidentified_Sphingobium
ASV_14079	33.0	45.0	0.0	18.0	0.0	0.0	d__Bacteria; p__Tenericutes; c__Mollicutes; o__RF39; f__unidentified_RF39; g__unidentified_RF39; s__unidentified_RF39
ASV_24083	0.0	0.0	0.0	9.0	0.0	135.0	d__Bacteria; p__Proteobacteria; c__Gammaproteobacteria; o__Pseudomonadales; f__Pseudomonadaceae; g__Pseudomonas; s__unidentified_Pseudomonas
ASV_6714	0.0	0.0	0.0	22.0	132.0	0.0	d__Bacteria; p__Acidobacteria; c__Acidobacteriia; o__Acidobacteriales; f__Koribacteraceae; g__unidentified_Koribacteraceae; s__unidentified_Koribacteraceae
ASV_7609	0.0	0.0	173.0	0.0	0.0	0.0	d__Bacteria; p__Tenericutes; c__Mollicutes; o__RF39; f__unidentified_RF39; g__unidentified_RF39; s__unidentified_RF39
ASV_19079	0.0	0.0	0.0	0.0	0.0	66.0	d__Bacteria; p__Actinobacteria; c__Actinobacteria; o__Actinomycetales; f__Corynebacteriaceae; g__Corynebacterium; s__unidentified_Corynebacterium
ASV_189	0.0	0.0	0.0	0.0	31.0	19.0	d__Bacteria; p__Firmicutes; c__Clostridia; o__Clostridiales; f__Ruminococcaceae; g__unidentified_Ruminococcaceae; s__unidentified_Ruminococcaceae
ASV_14445	76.0	0.0	0.0	0.0	71.0	0.0	d__Bacteria; p__Firmicutes; c__Clostridia; o__Clostridiales; f__unidentified_Clostridiales; g__unidentified_Clostridiales; s__unidentified_Clostridiales
ASV_9156	129.0	34.0	0.0	0.0	0.0	0.0	d__Bacteria; p__Firmicutes; c__Clostridia; o__Clostridiales; f__unidentified_Clostridiales; g__unidentified_Clostridiales; s__unidentified_Clostridiales
ASV_4016	0.0	0.0	0.0	22.0	10.0	53.0	d__Bacteria; p__TM7; c__TM7-1; o__unidentified_TM7-1; f__unidentified_TM7-1; g__unidentified_TM7-1; s__unidentified_TM7-1
ASV_20342	0.0	0.0	0.0	50.0	0.0	38.0	d__Bacteria; p__Gemmatimonadetes; c__Gemmatimonadetes; o__unidentified_Gemmatimonadetes; f__unidentified_Gemmatimonadetes; g__unidentified_Gemmatimonadetes; s__unidentified_Gemmatimonadetes
ASV_11098	0.0	0.0	0.0	0.0	38.0	100.0	d__Bacteria; p__Actinobacteria; c__Actinobacteria; o__Actinomycetales; f__Nocardioidaceae; g__Nocardioides; s__unidentified_Nocardioides
ASV_15077	131.0	21.0	0.0	0.0	0.0	0.0	d__Bacteria; p__TM7; c__TM7-3; o__CW040; f__F16; g__unidentified_F16; s__unidentified_F16
ASV_15462	18.0	0.0	11.0	24.0	11.0	21.0	d__Bacteria; p__Firmicutes; c__Clostridia; o__Clostridiales; f__unclassified_Clostridiales; g__unclassified_Clostridiales; s__unclassified_Clostridiales
ASV_2692	41.0	17.0	0.0	5.0	4.0	16.0	d__Bacteria; p__Proteobacteria; c__Deltaproteobacteria; o__Desulfovibrionales; f__Desulfovibrionaceae; g__unidentified_Desulfovibrionaceae; s__unidentified_Desulfovibrionaceae
ASV_11883	76.0	0.0	0.0	0.0	0.0	20.0	d__Bacteria; p__Proteobacteria; c__Gammaproteobacteria; o__Pseudomonadales; f__Moraxellaceae; g__Acinetobacter; s__unclassified_Acinetobacter
ASV_17325	45.0	6.0	18.0	0.0	16.0	19.0	d__Bacteria; p__Proteobacteria; c__Betaproteobacteria; o__Burkholderiales; f__Comamonadaceae; g__Acidovorax; s__unclassified_Acidovorax
ASV_1281	0.0	0.0	0.0	0.0	67.0	85.0	d__Bacteria; p__Firmicutes; c__Bacilli; o__Lactobacillales; f__Carnobacteriaceae; g__unclassified_Carnobacteriaceae; s__unclassified_Carnobacteriaceae
ASV_1677	0.0	0.0	0.0	0.0	141.0	0.0	d__Bacteria; p__Proteobacteria; c__Gammaproteobacteria; o__Enterobacteriales; f__Enterobacteriaceae; g__unclassified_Enterobacteriaceae; s__unclassified_Enterobacteriaceae
ASV_8408	7.0	14.0	5.0	8.0	28.0	0.0	d__Bacteria; p__Bacteroidetes; c__Bacteroidia; o__Bacteroidales; f__unidentified_Bacteroidales; g__unidentified_Bacteroidales; s__unidentified_Bacteroidales
ASV_25505	137.0	10.0	0.0	0.0	0.0	0.0	d__Bacteria; p__Firmicutes; c__Clostridia; o__Clostridiales; f__unidentified_Clostridiales; g__unidentified_Clostridiales; s__unidentified_Clostridiales
ASV_22628	0.0	0.0	0.0	29.0	86.0	12.0	d__Bacteria; p__Firmicutes; c__Clostridia; o__Clostridiales; f__[Acidaminobacteraceae]; g__Fusibacter; s__unidentified_Fusibacter
ASV_2307	13.0	0.0	9.0	13.0	0.0	43.0	d__Bacteria; p__Bacteroidetes; c__Bacteroidia; o__Bacteroidales; f__S24-7; g__unidentified_S24-7; s__unidentified_S24-7
ASV_427	34.0	14.0	9.0	0.0	0.0	8.0	d__Bacteria; p__Firmicutes; c__Clostridia; o__Clostridiales; f__Ruminococcaceae; g__Oscillospira; s__unidentified_Oscillospira
ASV_7538	21.0	0.0	6.0	21.0	8.0	17.0	d__Bacteria; p__Firmicutes; c__Clostridia; o__Clostridiales; f__[Mogibacteriaceae]; g__unidentified_[Mogibacteriaceae]; s__unidentified_[Mogibacteriaceae]
ASV_1542	39.0	17.0	40.0	6.0	0.0	0.0	d__Bacteria; p__Tenericutes; c__Mollicutes; o__RF39; f__unidentified_RF39; g__unidentified_RF39; s__unidentified_RF39
ASV_8586	0.0	19.0	0.0	18.0	41.0	0.0	d__Bacteria; p__Firmicutes; c__Clostridia; o__Clostridiales; f__[Mogibacteriaceae]; g__unidentified_[Mogibacteriaceae]; s__unidentified_[Mogibacteriaceae]
ASV_18997	0.0	0.0	0.0	12.0	12.0	73.0	d__Bacteria; p__Proteobacteria; c__Gammaproteobacteria; o__Xanthomonadales; f__Xanthomonadaceae; g__Rhodanobacter; s__unclassified_Rhodanobacter
ASV_8497	0.0	0.0	198.0	0.0	0.0	0.0	d__Bacteria; p__Bacteroidetes; c__Bacteroidia; o__Bacteroidales; f__S24-7; g__unidentified_S24-7; s__unidentified_S24-7
ASV_21940	45.0	39.0	0.0	5.0	0.0	51.0	d__Bacteria; p__Firmicutes; c__Clostridia; o__Clostridiales; f__Lachnospiraceae; g__[Ruminococcus]; s__[Ruminococcus]_gnavus
ASV_11072	81.0	0.0	0.0	0.0	0.0	14.0	d__Bacteria; p__Bacteroidetes; c__Bacteroidia; o__Bacteroidales; f__Porphyromonadaceae; g__Parabacteroides; s__Parabacteroides_distasonis
ASV_5485	7.0	6.0	0.0	6.0	20.0	39.0	d__Bacteria; p__Bacteroidetes; c__Bacteroidia; o__Bacteroidales; f__unidentified_Bacteroidales; g__unidentified_Bacteroidales; s__unidentified_Bacteroidales
ASV_6346	0.0	0.0	35.0	8.0	26.0	71.0	d__Bacteria; p__Firmicutes; c__Clostridia; o__Clostridiales; f__Ruminococcaceae; g__Oscillospira; s__unidentified_Oscillospira
ASV_21243	28.0	68.0	0.0	0.0	0.0	0.0	d__Bacteria; p__Firmicutes; c__Clostridia; o__Clostridiales; f__Lachnospiraceae; g__Coprococcus; s__unidentified_Coprococcus
ASV_17375	0.0	25.0	11.0	0.0	34.0	2.0	d__Bacteria; p__Firmicutes; c__Clostridia; o__Clostridiales; f__Ruminococcaceae; g__unidentified_Ruminococcaceae; s__unidentified_Ruminococcaceae
ASV_8199	0.0	0.0	0.0	43.0	0.0	58.0	d__Bacteria; p__Proteobacteria; c__Alphaproteobacteria; o__Ellin329; f__unidentified_Ellin329; g__unidentified_Ellin329; s__unidentified_Ellin329
ASV_17799	0.0	16.0	15.0	0.0	0.0	0.0	d__Bacteria; p__Firmicutes; c__Clostridia; o__Clostridiales; f__unidentified_Clostridiales; g__unidentified_Clostridiales; s__unidentified_Clostridiales
ASV_8379	0.0	0.0	0.0	35.0	41.0	30.0	d__Bacteria; p__Actinobacteria; c__Actinobacteria; o__Actinomycetales; f__Frankiaceae; g__unidentified_Frankiaceae; s__unidentified_Frankiaceae
ASV_23127	58.0	0.0	0.0	0.0	0.0	0.0	d__Bacteria; p__Firmicutes; c__Bacilli; o__Lactobacillales; f__Lactobacillaceae; g__Lactobacillus; s__unclassified_Lactobacillus
ASV_732	135.0	0.0	10.0	0.0	0.0	0.0	d__Bacteria; p__Firmicutes; c__Clostridia; o__Clostridiales; f__Ruminococcaceae; g__Oscillospira; s__unidentified_Oscillospira
ASV_20862	3.0	0.0	50.0	0.0	0.0	60.0	d__Bacteria; p__Firmicutes; c__Clostridia; o__Clostridiales; f__unidentified_Clostridiales; g__unidentified_Clostridiales; s__unidentified_Clostridiales
ASV_15899	0.0	13.0	0.0	22.0	1.0	44.0	d__Bacteria; p__Actinobacteria; c__Actinobacteria; o__Actinomycetales; f__Micrococcaceae; g__Arthrobacter; s__unclassified_Arthrobacter
ASV_5940	147.0	0.0	0.0	0.0	0.0	0.0	d__Bacteria; p__Firmicutes; c__Clostridia; o__Clostridiales; f__unidentified_Clostridiales; g__unidentified_Clostridiales; s__unidentified_Clostridiales
ASV_15187	11.0	0.0	0.0	11.0	4.0	0.0	d__Bacteria; p__Bacteroidetes; c__Bacteroidia; o__Bacteroidales; f__[Paraprevotellaceae]; g__YRC22; s__unidentified_YRC22
ASV_19576	0.0	37.0	0.0	0.0	0.0	0.0	d__Bacteria; p__Firmicutes; c__Clostridia; o__Clostridiales; f__Ruminococcaceae; g__Ruminococcus; s__Ruminococcus_callidus
ASV_7147	0.0	0.0	29.0	16.0	0.0	0.0	d__Bacteria; p__Firmicutes; c__Clostridia; o__Clostridiales; f__Ruminococcaceae; g__unidentified_Ruminococcaceae; s__unidentified_Ruminococcaceae
ASV_15865	0.0	0.0	0.0	5.0	36.0	27.0	d__Bacteria; p__Firmicutes; c__Clostridia; o__Clostridiales; f__unclassified_Clostridiales; g__unclassified_Clostridiales; s__unclassified_Clostridiales
ASV_15505	0.0	0.0	0.0	57.0	39.0	0.0	d__Bacteria; p__TM7; c__TM7-1; o__unidentified_TM7-1; f__unidentified_TM7-1; g__unidentified_TM7-1; s__unidentified_TM7-1
ASV_18963	0.0	25.0	0.0	0.0	0.0	10.0	d__Bacteria; p__Firmicutes; c__Clostridia; o__Clostridiales; f__Ruminococcaceae; g__Oscillospira; s__unidentified_Oscillospira
ASV_5314	0.0	77.0	0.0	0.0	0.0	0.0	d__Bacteria; p__Firmicutes; c__Clostridia; o__Clostridiales; f__unidentified_Clostridiales; g__unidentified_Clostridiales; s__unidentified_Clostridiales
ASV_22920	19.0	15.0	0.0	44.0	0.0	0.0	d__Bacteria; p__Firmicutes; c__Clostridia; o__Clostridiales; f__Clostridiaceae; g__unclassified_Clostridiaceae; s__unclassified_Clostridiaceae
ASV_18502	10.0	21.0	22.0	8.0	0.0	0.0	d__Bacteria; p__Firmicutes; c__Clostridia; o__Clostridiales; f__Ruminococcaceae; g__Oscillospira; s__unidentified_Oscillospira
ASV_6684	0.0	0.0	0.0	22.0	30.0	43.0	d__Bacteria; p__Proteobacteria; c__Gammaproteobacteria; o__Pseudomonadales; f__Moraxellaceae; g__Psychrobacter; s__Psychrobacter_sanguinis
ASV_388	0.0	0.0	183.0	0.0	0.0	0.0	d__Bacteria; p__Bacteroidetes; c__Bacteroidia; o__Bacteroidales; f__Rikenellaceae; g__unclassified_Rikenellaceae; s__unclassified_Rikenellaceae
ASV_4999	0.0	0.0	0.0	30.0	56.0	28.0	d__Bacteria; p__Actinobacteria; c__Actinobacteria; o__Actinomycetales; f__Microbacteriaceae; g__Cryocola; s__unidentified_Cryocola
ASV_1753	0.0	0.0	0.0	0.0	133.0	0.0	d__Bacteria; p__Actinobacteria; c__Actinobacteria; o__Actinomycetales; f__Mycobacteriaceae; g__Mycobacterium; s__unidentified_Mycobacterium
ASV_103	0.0	39.0	27.0	0.0	0.0	0.0	d__Bacteria; p__Firmicutes; c__Clostridia; o__Clostridiales; f__unidentified_Clostridiales; g__unidentified_Clostridiales; s__unidentified_Clostridiales
ASV_10722	47.0	14.0	21.0	0.0	20.0	0.0	d__Bacteria; p__Firmicutes; c__Clostridia; o__Clostridiales; f__Ruminococcaceae; g__Oscillospira; s__unidentified_Oscillospira
ASV_15780	0.0	169.0	0.0	0.0	0.0	0.0	d__Bacteria; p__Firmicutes; c__Clostridia; o__Clostridiales; f__unidentified_Clostridiales; g__unidentified_Clostridiales; s__unidentified_Clostridiales
ASV_12621	0.0	25.0	11.0	0.0	6.0	21.0	d__Bacteria; p__Actinobacteria; c__Coriobacteriia; o__Coriobacteriales; f__Coriobacteriaceae; g__unidentified_Coriobacteriaceae; s__unidentified_Coriobacteriaceae
ASV_1695	56.0	15.0	34.0	0.0	0.0	0.0	d__Bacteria; p__Firmicutes; c__Clostridia; o__Clostridiales; f__Ruminococcaceae; g__Oscillospira; s__unidentified_Oscillospira
ASV_13656	0.0	0.0	0.0	35.0	29.0	33.0	d__Bacteria; p__Proteobacteria; c__Gammaproteobacteria; o__Xanthomonadales; f__Xanthomonadaceae; g__Rhodanobacter; s__unclassified_Rhodanobacter
ASV_5608	0.0	0.0	0.0	27.0	36.0	57.0	d__Bacteria; p__TM7; c__TM7-1; o__unidentified_TM7-1; f__unidentified_TM7-1; g__unidentified_TM7-1; s__unidentified_TM7-1
ASV_12615	0.0	0.0	0.0	0.0	8.0	0.0	d__Bacteria; p__Firmicutes; c__Clostridia; o__Clostridiales; f__unclassified_Clostridiales; g__unclassified_Clostridiales; s__unclassified_Clostridiales
ASV_20993	12.0	12.0	0.0	11.0	4.0	3.0	d__Bacteria; p__Firmicutes; c__Erysipelotrichi; o__Erysipelotrichales; f__Erysipelotrichaceae; g__[Eubacterium]; s__[Eubacterium]_dolichum
ASV_7638	42.0	19.0	32.0	0.0	0.0	0.0	d__Bacteria; p__Bacteroidetes; c__Bacteroidia; o__Bacteroidales; f__[Odoribacteraceae]; g__Butyricimonas; s__unidentified_Butyricimonas
ASV_6110	49.0	0.0	0.0	0.0	21.0	19.0	d__Bacteria; p__Firmicutes; c__Clostridia; o__Clostridiales; f__Lachnospiraceae; g__[Ruminococcus]; s__[Ruminococcus]_gnavus
ASV_15945	27.0	0.0	81.0	0.0	0.0	10.0	d__Bacteria; p__Firmicutes; c__Clostridia; o__Clostridiales; f__Lachnospiraceae; g__unidentified_Lachnospiraceae; s__unidentified_Lachnospiraceae
ASV_11910	0.0	0.0	0.0	10.0	68.0	0.0	d__Bacteria; p__TM7; c__TM7-1; o__unidentified_TM7-1; f__unidentified_TM7-1; g__unidentified_TM7-1; s__unidentified_TM7-1
ASV_8964	0.0	0.0	0.0	50.0	0.0	23.0	d__Bacteria; p__Actinobacteria; c__Actinobacteria; o__Actinomycetales; f__unidentified_Actinomycetales; g__unidentified_Actinomycetales; s__unidentified_Actinomycetales
ASV_12450	81.0	0.0	7.0	0.0	0.0	0.0	d__Bacteria; p__Bacteroidetes; c__Bacteroidia; o__Bacteroidales; f__Porphyromonadaceae; g__Parabacteroides; s__Parabacteroides_distasonis
ASV_5733	0.0	16.0	0.0	0.0	34.0	36.0	d__Bacteria; p__Firmicutes; c__Clostridia; o__Clostridiales; f__unidentified_Clostridiales; g__unidentified_Clostridiales; s__unidentified_Clostridiales
ASV_12055	0.0	0.0	0.0	15.0	42.0	0.0	d__Bacteria; p__Firmicutes; c__Clostridia; o__Clostridiales; f__Ruminococcaceae; g__Oscillospira; s__unidentified_Oscillospira
ASV_17106	0.0	0.0	0.0	0.0	22.0	75.0	d__Bacteria; p__Gemmatimonadetes; c__Gemmatimonadetes; o__unidentified_Gemmatimonadetes; f__unidentified_Gemmatimonadetes; g__unidentified_Gemmatimonadetes; s__unidentified_Gemmatimonadetes
ASV_1516	0.0	0.0	0.0	0.0	71.0	0.0	d__Bacteria; p__Chloroflexi; c__Ellin6529; o__unidentified_Ellin6529; f__unidentified_Ellin6529; g__unidentified_Ellin6529; s__unidentified_Ellin6529
ASV_21197	0.0	0.0	0.0	5.0	50.0	47.0	d__Bacteria; p__Acidobacteria; c__Solibacteres; o__Solibacterales; f__Solibacteraceae; g__unidentified_Solibacteraceae; s__unidentified_Solibacteraceae
ASV_22268	0.0	0.0	0.0	36.0	61.0	0.0	d__Bacteria; p__Proteobacteria; c__Alphaproteobacteria; o__Rhizobiales; f__Hyphomicrobiaceae; g__Rhodoplanes; s__unidentified_Rhodoplanes
ASV_1796	22.0	22.0	0.0	3.0	0.0	5.0	d__Bacteria; p__Proteobacteria; c__Alphaproteobacteria; o__Rhizobiales; f__Beijerinckiaceae; g__unidentified_Beijerinckiaceae; s__unidentified_Beijerinckiaceae
ASV_8532	0.0	0.0	0.0	11.0	24.0	74.0	d__Bacteria; p__Actinobacteria; c__Actinobacteria; o__Actinomycetales; f__Nocardioidaceae; g__unidentified_Nocardioidaceae; s__unidentified_Nocardioidaceae
ASV_18242	96.0	0.0	18.0	0.0	0.0	0.0	d__Bacteria; p__Firmicutes; c__Clostridia; o__Clostridiales; f__Lachnospiraceae; g__unidentified_Lachnospiraceae; s__unidentified_Lachnospiraceae
ASV_13747	22.0	0.0	26.0	0.0	32.0	15.0	d__Bacteria; p__Firmicutes; c__Clostridia; o__Clostridiales; f__Ruminococcaceae; g__Oscillospira; s__unidentified_Oscillospira
ASV_16346	0.0	0.0	0.0	23.0	18.0	0.0	d__Bacteria; p__Firmicutes; c__Clostridia; o__Clostridiales; f__unidentified_Clostridiales; g__unidentified_Clostridiales; s__unidentified_Clostridiales
ASV_23414	12.0	48.0	0.0	4.0	7.0	0.0	d__Bacteria; p__Bacteroidetes; c__Bacteroidia; o__Bacteroidales; f__Rikenellaceae; g__unidentified_Rikenellaceae; s__unidentified_Rikenellaceae
ASV_18267	28.0	30.0	18.0	0.0	0.0	11.0	d__Bacteria; p__Bacteroidetes; c__Bacteroidia; o__Bacteroidales; f__S24-7; g__unidentified_S24-7; s__unidentified_S24-7
ASV_8402	0.0	0.0	0.0	0.0	78.0	45.0	d__Bacteria; p__Firmicutes; c__Clostridia; o__Clostridiales; f__Ruminococcaceae; g__Ruminococcus; s__unidentified_Ruminococcus
ASV_20608	13.0	28.0	0.0	17.0	3.0	14.0	d__Bacteria; p__Bacteroidetes; c__Bacteroidia; o__Bacteroidales; f__S24-7; g__unidentified_S24-7; s__unidentified_S24-7
ASV_21085	0.0	0.0	0.0	27.0	0.0	41.0	d__Bacteria; p__Actinobacteria; c__Actinobacteria; o__Actinomycetales; f__Micromonosporaceae; g__unclassified_Micromonosporaceae; s__unclassified_Micromonosporaceae
ASV_14295	14.0	0.0	0.0	0.0	31.0	54.0	d__Bacteria; p__Bacteroidetes; c__Bacteroidia; o__Bacteroidales; f__unidentified_Bacteroidales; g__unidentified_Bacteroidales; s__unidentified_Bacteroidales
ASV_13134	0.0	0.0	13.0	0.0	0.0	23.0	d__Bacteria; p__Firmicutes; c__Bacilli; o__Lactobacillales; f__Enterococcaceae; g__Enterococcus; s__unclassified_Enterococcus
ASV_17887	0.0	0.0	0.0	75.0	0.0	0.0	d__Bacteria; p__Firmicutes; c__Clostridia; o__Clostridiales; f__Lachnospiraceae; g__Blautia; s__unidentified_Blautia
ASV_12255	35.0	0.0	12.0	0.0	0.0	0.0	d__Bacteria; p__Bacteroidetes; c__Bacteroidia; o__Bacteroidales; f__Rikenellaceae; g__unclassified_Rikenellaceae; s__unclassified_Rikenellaceae
ASV_1335	22.0	0.0	15.0	7.0	0.0	7.0	d__Bacteria; p__Bacteroidetes; c__Bacteroidia; o__Bacteroidales; f__Bacteroidaceae; g__Bacteroides; s__unclassified_Bacteroides
ASV_11627	0.0	0.0	0.0	26.0	54.0	24.0	d__Bacteria; p__Firmicutes; c__Bacilli; o__Bacillales; f__Bacillaceae; g__Bacillus; s__Bacillus_flexus
ASV_24845	0.0	0.0	0.0	0.0	117.0	0.0	d__Bacteria; p__Actinobacteria; c__Actinobacteria; o__Actinomycetales; f__Streptosporangiaceae; g__unclassified_Streptosporangiaceae; s__unclassified_Streptosporangiaceae
ASV_15198	0.0	0.0	0.0	0.0	130.0	0.0	d__Bacteria; p__Firmicutes; c__Clostridia; o__Clostridiales; f__Ruminococcaceae; g__Ruminococcus; s__unidentified_Ruminococcus
ASV_22922	18.0	0.0	0.0	0.0	0.0	0.0	d__Bacteria; p__Firmicutes; c__Clostridia; o__Clostridiales; f__unidentified_Clostridiales; g__unidentified_Clostridiales; s__unidentified_Clostridiales
ASV_15361	111.0	28.0	0.0	0.0	0.0	0.0	d__Bacteria; p__Firmicutes; c__Clostridia; o__Clostridiales; f__unclassified_Clostridiales; g__unclassified_Clostridiales; s__unclassified_Clostridiales
ASV_4346	0.0	0.0	0.0	0.0	23.0	54.0	d__Bacteria; p__Firmicutes; c__Clostridia; o__Clostridiales; f__Clostridiaceae; g__Proteiniclasticum; s__unidentified_Proteiniclasticum
ASV_19961	3.0	21.0	8.0	6.0	0.0	10.0	d__Bacteria; p__Firmicutes; c__Clostridia; o__Clostridiales; f__Ruminococcaceae; g__unidentified_Ruminococcaceae; s__unidentified_Ruminococcaceae
ASV_557	8.0	31.0	13.0	4.0	0.0	0.0	d__Bacteria; p__Firmicutes; c__Clostridia; o__Clostridiales; f__unclassified_Clostridiales; g__unclassified_Clostridiales; s__unclassified_Clostridiales
ASV_15970	19.0	2.0	7.0	0.0	8.0	19.0	d__Bacteria; p__Proteobacteria; c__Deltaproteobacteria; o__Desulfovibrionales; f__Desulfovibrionaceae; g__Desulfovibrio; s__unidentified_Desulfovibrio
ASV_22647	0.0	0.0	0.0	30.0	26.0	36.0	d__Bacteria; p__Proteobacteria; c__Alphaproteobacteria; o__Sphingomonadales; f__Sphingomonadaceae; g__Kaistobacter; s__unidentified_Kaistobacter
ASV_5800	86.0	36.0	7.0	0.0	0.0	0.0	d__Bacteria; p__Tenericutes; c__Mollicutes; o__RF39; f__unidentified_RF39; g__unidentified_RF39; s__unidentified_RF39
ASV_18675	0.0	0.0	0.0	0.0	27.0	17.0	d__Bacteria; p__Firmicutes; c__Clostridia; o__Clostridiales; f__Lachnospiraceae; g__[Ruminococcus]; s__[Ruminococcus]_gnavus
ASV_230	9.0	5.0	7.0	6.0	32.0	0.0	d__Bacteria; p__Bacteroidetes; c__Bacteroidia; o__Bacteroidales; f__S24-7; g__unidentified_S24-7; s__unidentified_S24-7
ASV_1478	7.0	0.0	0.0	8.0	19.0	19.0	d__Bacteria; p__Firmicutes; c__Clostridia; o__Clostridiales; f__Ruminococcaceae; g__unidentified_Ruminococcaceae; s__unidentified_Ruminococcaceae
ASV_24840	51.0	0.0	17.0	0.0	0.0	0.0	d__Bacteria; p__Firmicutes; c__Clostridia; o__Clostridiales; f__Ruminococcaceae; g__Oscillospira; s__unidentified_Oscillospira
ASV_6464	0.0	49.0	53.0	0.0	0.0	0.0	d__Bacteria; p__Firmicutes; c__Clostridia; o__Clostridiales; f__unidentified_Clostridiales; g__unidentified_Clostridiales; s__unidentified_Clostridiales
ASV_13679	0.0	0.0	80.0	0.0	0.0	0.0	d__Bacteria; p__Tenericutes; c__Mollicutes; o__Anaeroplasmatales; f__Anaeroplasmataceae; g__Anaeroplasma; s__unidentified_Anaeroplasma
ASV_19493	0.0	0.0	0.0	0.0	0.0	112.0	d__Bacteria; p__Proteobacteria; c__Gammaproteobacteria; o__Pseudomonadales; f__Moraxellaceae; g__Acinetobacter; s__Acinetobacter_guillouiae
ASV_24399	22.0	58.0	57.0	4.0	0.0	0.0	d__Bacteria; p__Firmicutes; c__Clostridia; o__Clostridiales; f__Ruminococcaceae; g__unidentified_Ruminococcaceae; s__unidentified_Ruminococcaceae
ASV_19918	56.0	0.0	0.0	0.0	0.0	0.0	d__Bacteria; p__Firmicutes; c__Clostridia; o__Clostridiales; f__Ruminococcaceae; g__unidentified_Ruminococcaceae; s__unidentified_Ruminococcaceae
ASV_2408	18.0	6.0	19.0	7.0	9.0	0.0	d__Bacteria; p__Firmicutes; c__Clostridia; o__Clostridiales; f__Lachnospiraceae; g__unclassified_Lachnospiraceae; s__unclassified_Lachnospiraceae
ASV_24318	0.0	0.0	160.0	0.0	0.0	0.0	d__Bacteria; p__Bacteroidetes; c__Bacteroidia; o__Bacteroidales; f__S24-7; g__unidentified_S24-7; s__unidentified_S24-7
ASV_16657	0.0	0.0	0.0	20.0	26.0	0.0	d__Bacteria; p__Chloroflexi; c__Ktedonobacteria; o__JG30-KF-AS9; f__unidentified_JG30-KF-AS9; g__unidentified_JG30-KF-AS9; s__unidentified_JG30-KF-AS9
ASV_21874	0.0	0.0	0.0	0.0	37.0	0.0	d__Bacteria; p__Actinobacteria; c__Actinobacteria; o__Actinomycetales; f__Geodermatophilaceae; g__unclassified_Geodermatophilaceae; s__unclassified_Geodermatophilaceae
ASV_16764	8.0	0.0	0.0	0.0	3.0	0.0	d__Bacteria; p__Firmicutes; c__Clostridia; o__Clostridiales; f__Ruminococcaceae; g__unidentified_Ruminococcaceae; s__unidentified_Ruminococcaceae
ASV_26462	7.0	0.0	0.0	13.0	0.0	0.0	d__Bacteria; p__Firmicutes; c__Clostridia; o__Clostridiales; f__Lachnospiraceae; g__unidentified_Lachnospiraceae; s__unidentified_Lachnospiraceae
ASV_14776	0.0	22.0	0.0	31.0	10.0	36.0	d__Bacteria; p__Firmicutes; c__Bacilli; o__Lactobacillales; f__Lactobacillaceae; g__Lactobacillus; s__unclassified_Lactobacillus
ASV_14195	0.0	0.0	0.0	16.0	0.0	32.0	d__Bacteria; p__Firmicutes; c__Clostridia; o__Clostridiales; f__[Mogibacteriaceae]; g__unidentified_[Mogibacteriaceae]; s__unidentified_[Mogibacteriaceae]
ASV_8863	0.0	0.0	0.0	12.0	0.0	47.0	d__Bacteria; p__Proteobacteria; c__Alphaproteobacteria; o__Rhizobiales; f__Bradyrhizobiaceae; g__unclassified_Bradyrhizobiaceae; s__unclassified_Bradyrhizobiaceae
ASV_15335	0.0	0.0	0.0	31.0	33.0	43.0	d__Bacteria; p__Proteobacteria; c__Alphaproteobacteria; o__Sphingomonadales; f__Sphingomonadaceae; g__Sphingomonas; s__Sphingomonas_wittichii
ASV_5497	0.0	18.0	0.0	0.0	0.0	0.0	d__Bacteria; p__Firmicutes; c__Clostridia; o__Clostridiales; f__Ruminococcaceae; g__Ruminococcus; s__Ruminococcus_flavefaciens
ASV_18674	0.0	0.0	0.0	0.0	54.0	54.0	d__Bacteria; p__Actinobacteria; c__Actinobacteria; o__Actinomycetales; f__Mycobacteriaceae; g__Mycobacterium; s__unclassified_Mycobacterium
ASV_23129	0.0	0.0	0.0	0.0	41.0	78.0	d__Bacteria; p__Gemmatimonadetes; c__Gemmatimonadetes; o__Ellin5290; f__unidentified_Ellin5290; g__unidentified_Ellin5290; s__unidentified_Ellin5290
ASV_2296	10.0	0.0	0.0	28.0	45.0	0.0	d__Bacteria; p__Actinobacteria; c__Actinobacteria; o__Actinomycetales; f__Micrococcaceae; g__Arthrobacter; s__unclassified_Arthrobacter
ASV_6870	0.0	96.0	40.0	0.0	0.0	0.0	d__Bacteria; p__Firmicutes; c__Clostridia; o__Clostridiales; f__unidentified_Clostridiales; g__unidentified_Clostridiales; s__unidentified_Clostridiales
ASV_10249	0.0	41.0	0.0	0.0	0.0	3.0	d__Bacteria; p__Bacteroidetes; c__Bacteroidia; o__Bacteroidales; f__S24-7; g__unidentified_S24-7; s__unidentified_S24-7
ASV_3591	0.0	0.0	0.0	31.0	66.0	0.0	d__Bacteria; p__Firmicutes; c__Bacilli; o__Bacillales; f__Bacillaceae; g__Bacillus; s__Bacillus_fumarioli
ASV_10578	0.0	0.0	0.0	31.0	0.0	0.0	d__Bacteria; p__Firmicutes; c__Clostridia; o__Clostridiales; f__unidentified_Clostridiales; g__unidentified_Clostridiales; s__unidentified_Clostridiales
ASV_21638	31.0	35.0	0.0	0.0	0.0	0.0	d__Bacteria; p__Bacteroidetes; c__Bacteroidia; o__Bacteroidales; f__Rikenellaceae; g__unclassified_Rikenellaceae; s__unclassified_Rikenellaceae
ASV_18582	9.0	19.0	10.0	14.0	0.0	0.0	d__Bacteria; p__Firmicutes; c__Clostridia; o__Clostridiales; f__Dehalobacteriaceae; g__unidentified_Dehalobacteriaceae; s__unidentified_Dehalobacteriaceae
ASV_16161	0.0	0.0	0.0	23.0	11.0	37.0	d__Bacteria; p__Actinobacteria; c__Thermoleophilia; o__Solirubrobacterales; f__Patulibacteraceae; g__unidentified_Patulibacteraceae; s__unidentified_Patulibacteraceae
ASV_6290	8.0	0.0	11.0	11.0	0.0	37.0	d__Bacteria; p__Spirochaetes; c__Spirochaetes; o__Spirochaetales; f__Spirochaetaceae; g__Treponema; s__unidentified_Treponema
ASV_543	22.0	0.0	14.0	3.0	13.0	6.0	d__Bacteria; p__Proteobacteria; c__Alphaproteobacteria; o__Caulobacterales; f__Caulobacteraceae; g__unclassified_Caulobacteraceae; s__unclassified_Caulobacteraceae
ASV_3347	0.0	0.0	0.0	24.0	0.0	0.0	d__Bacteria; p__Firmicutes; c__Clostridia; o__Clostridiales; f__Peptostreptococcaceae; g__unidentified_Peptostreptococcaceae; s__unidentified_Peptostreptococcaceae
ASV_25757	9.0	8.0	0.0	5.0	0.0	3.0	d__Bacteria; p__Firmicutes; c__Clostridia; o__Clostridiales; f__unidentified_Clostridiales; g__unidentified_Clostridiales; s__unidentified_Clostridiales
ASV_21859	9.0	7.0	0.0	4.0	7.0	16.0	d__Bacteria; p__Actinobacteria; c__Coriobacteriia; o__Coriobacteriales; f__Coriobacteriaceae; g__Adlercreutzia; s__unidentified_Adlercreutzia
ASV_19272	14.0	10.0	27.0	0.0	0.0	0.0	d__Bacteria; p__Proteobacteria; c__Gammaproteobacteria; o__Legionellales; f__unidentified_Legionellales; g__unidentified_Legionellales; s__unidentified_Legionellales
ASV_11451	0.0	0.0	149.0	0.0	0.0	0.0	d__Bacteria; p__Bacteroidetes; c__Bacteroidia; o__Bacteroidales; f__S24-7; g__unidentified_S24-7; s__unidentified_S24-7
ASV_7190	0.0	0.0	0.0	35.0	35.0	0.0	d__Bacteria; p__Proteobacteria; c__Betaproteobacteria; o__SC-I-84; f__unidentified_SC-I-84; g__unidentified_SC-I-84; s__unidentified_SC-I-84
ASV_4725	101.0	0.0	0.0	0.0	0.0	0.0	d__Bacteria; p__Firmicutes; c__Clostridia; o__Clostridiales; f__Ruminococcaceae; g__Faecalibacterium; s__Faecalibacterium_prausnitzii
ASV_7459	0.0	0.0	0.0	18.0	39.0	11.0	d__Bacteria; p__Proteobacteria; c__Gammaproteobacteria; o__Pseudomonadales; f__Moraxellaceae; g__Acinetobacter; s__unidentified_Acinetobacter
ASV_18890	0.0	0.0	0.0	0.0	59.0	37.0	d__Bacteria; p__Firmicutes; c__Clostridia; o__Clostridiales; f__Peptostreptococcaceae; g__Clostridium; s__Clostridium_sticklandii
ASV_6557	0.0	0.0	0.0	0.0	62.0	24.0	d__Bacteria; p__Firmicutes; c__Clostridia; o__Clostridiales; f__Ruminococcaceae; g__Oscillospira; s__unclassified_Oscillospira
ASV_26198	0.0	0.0	0.0	22.0	64.0	19.0	d__Bacteria; p__Acidobacteria; c__Acidobacteriia; o__Acidobacteriales; f__Acidobacteriaceae; g__unidentified_Acidobacteriaceae; s__unidentified_Acidobacteriaceae
ASV_18096	0.0	0.0	0.0	47.0	17.0	8.0	d__Bacteria; p__Proteobacteria; c__Gammaproteobacteria; o__Xanthomonadales; f__Xanthomonadaceae; g__Rhodanobacter; s__unclassified_Rhodanobacter
ASV_2537	0.0	0.0	0.0	10.0	15.0	51.0	d__Bacteria; p__Firmicutes; c__Clostridia; o__Clostridiales; f__Ruminococcaceae; g__Ruminococcus; s__Ruminococcus_bromii
ASV_11578	6.0	0.0	0.0	0.0	79.0	5.0	d__Bacteria; p__Firmicutes; c__Clostridia; o__Clostridiales; f__Ruminococcaceae; g__Ruminococcus; s__unidentified_Ruminococcus
ASV_14112	16.0	39.0	0.0	0.0	0.0	0.0	d__Bacteria; p__Firmicutes; c__Clostridia; o__Clostridiales; f__Ruminococcaceae; g__unclassified_Ruminococcaceae; s__unclassified_Ruminococcaceae
ASV_16253	0.0	0.0	0.0	29.0	0.0	0.0	d__Bacteria; p__Firmicutes; c__Clostridia; o__Clostridiales; f__Ruminococcaceae; g__unidentified_Ruminococcaceae; s__unidentified_Ruminococcaceae
ASV_4483	7.0	4.0	11.0	14.0	0.0	22.0	d__Bacteria; p__Firmicutes; c__Clostridia; o__Clostridiales; f__Lachnospiraceae; g__unclassified_Lachnospiraceae; s__unclassified_Lachnospiraceae
ASV_25093	0.0	0.0	0.0	32.0	20.0	14.0	d__Bacteria; p__Proteobacteria; c__Gammaproteobacteria; o__Pseudomonadales; f__Moraxellaceae; g__Acinetobacter; s__unidentified_Acinetobacter
ASV_13432	17.0	6.0	48.0	3.0	0.0	0.0	d__Bacteria; p__Bacteroidetes; c__Bacteroidia; o__Bacteroidales; f__S24-7; g__unidentified_S24-7; s__unidentified_S24-7
ASV_14226	27.0	18.0	31.0	0.0	0.0	0.0	d__Bacteria; p__Firmicutes; c__Clostridia; o__Clostridiales; f__Dehalobacteriaceae; g__Dehalobacterium; s__unidentified_Dehalobacterium
ASV_24025	31.0	0.0	23.0	0.0	17.0	0.0	d__Bacteria; p__Firmicutes; c__Clostridia; o__Clostridiales; f__Lachnospiraceae; g__unidentified_Lachnospiraceae; s__unidentified_Lachnospiraceae
ASV_26440	97.0	9.0	0.0	0.0	0.0	0.0	d__Bacteria; p__Firmicutes; c__Clostridia; o__Clostridiales; f__Ruminococcaceae; g__Oscillospira; s__unidentified_Oscillospira
ASV_5155	0.0	0.0	0.0	26.0	54.0	13.0	d__Bacteria; p__Proteobacteria; c__Betaproteobacteria; o__Burkholderiales; f__Alcaligenaceae; g__unclassified_Alcaligenaceae; s__unclassified_Alcaligenaceae
ASV_26422	0.0	0.0	0.0	12.0	0.0	0.0	d__Bacteria; p__Tenericutes; c__Mollicutes; o__RF39; f__unidentified_RF39; g__unidentified_RF39; s__unidentified_RF39
ASV_22034	23.0	10.0	0.0	15.0	15.0	10.0	d__Bacteria; p__Actinobacteria; c__Coriobacteriia; o__Coriobacteriales; f__Coriobacteriaceae; g__Adlercreutzia; s__unidentified_Adlercreutzia
ASV_947	16.0	58.0	0.0	0.0	0.0	0.0	d__Bacteria; p__Tenericutes; c__Mollicutes; o__RF39; f__unidentified_RF39; g__unidentified_RF39; s__unidentified_RF39
ASV_15833	0.0	0.0	0.0	0.0	0.0	95.0	d__Bacteria; p__[Thermi]; c__Deinococci; o__Thermales; f__Thermaceae; g__Thermus; s__unidentified_Thermus
ASV_22450	7.0	0.0	0.0	12.0	0.0	27.0	d__Bacteria; p__Firmicutes; c__Clostridia; o__Clostridiales; f__Veillonellaceae; g__Phascolarctobacterium; s__unidentified_Phascolarctobacterium
ASV_15409	0.0	47.0	0.0	17.0	0.0	0.0	d__Bacteria; p__Firmicutes; c__Clostridia; o__Clostridiales; f__Ruminococcaceae; g__Oscillospira; s__unidentified_Oscillospira
ASV_8782	0.0	0.0	1.0	0.0	15.0	82.0	d__Bacteria; p__Bacteroidetes; c__Bacteroidia; o__Bacteroidales; f__RF16; g__unidentified_RF16; s__unidentified_RF16
ASV_14992	0.0	0.0	0.0	0.0	52.0	51.0	d__Bacteria; p__Proteobacteria; c__Alphaproteobacteria; o__Rhizobiales; f__Hyphomicrobiaceae; g__Devosia; s__unidentified_Devosia
ASV_15219	30.0	4.0	17.0	0.0	0.0	0.0	d__Bacteria; p__Proteobacteria; c__Alphaproteobacteria; o__RF32; f__unidentified_RF32; g__unidentified_RF32; s__unidentified_RF32
ASV_25639	24.0	0.0	68.0	0.0	0.0	7.0	d__Bacteria; p__Firmicutes; c__Clostridia; o__Clostridiales; f__Lachnospiraceae; g__unclassified_Lachnospiraceae; s__unclassified_Lachnospiraceae
ASV_24310	0.0	0.0	0.0	2.0	22.0	58.0	d__Bacteria; p__Bacteroidetes; c__[Saprospirae]; o__[Saprospirales]; f__Chitinophagaceae; g__unidentified_Chitinophagaceae; s__unidentified_Chitinophagaceae
ASV_23295	0.0	0.0	0.0	0.0	30.0	29.0	d__Bacteria; p__Proteobacteria; c__Alphaproteobacteria; o__Ellin329; f__unidentified_Ellin329; g__unidentified_Ellin329; s__unidentified_Ellin329
ASV_21052	14.0	0.0	0.0	0.0	0.0	0.0	d__Bacteria; p__Firmicutes; c__Clostridia; o__Clostridiales; f__Lachnospiraceae; g__Roseburia; s__unidentified_Roseburia
ASV_13194	85.0	0.0	23.0	0.0	0.0	0.0	d__Bacteria; p__Firmicutes; c__Clostridia; o__Clostridiales; f__Ruminococcaceae; g__Oscillospira; s__unidentified_Oscillospira
ASV_21016	0.0	23.0	0.0	0.0	0.0	0.0	d__Bacteria; p__Firmicutes; c__Clostridia; o__Clostridiales; f__Ruminococcaceae; g__Oscillospira; s__unidentified_Oscillospira
ASV_8577	0.0	0.0	0.0	7.0	0.0	0.0	d__Bacteria; p__Actinobacteria; c__Actinobacteria; o__Actinomycetales; f__Intrasporangiaceae; g__unclassified_Intrasporangiaceae; s__unclassified_Intrasporangiaceae
ASV_8148	98.0	0.0	12.0	0.0	0.0	0.0	d__Bacteria; p__Firmicutes; c__Clostridia; o__Clostridiales; f__Ruminococcaceae; g__Oscillospira; s__unidentified_Oscillospira
ASV_12743	5.0	7.0	0.0	8.0	0.0	0.0	d__Bacteria; p__Actinobacteria; c__Coriobacteriia; o__Coriobacteriales; f__Coriobacteriaceae; g__unidentified_Coriobacteriaceae; s__unidentified_Coriobacteriaceae
ASV_15438	0.0	15.0	8.0	17.0	11.0	2.0	d__Bacteria; p__Firmicutes; c__Clostridia; o__Clostridiales; f__Ruminococcaceae; g__unidentified_Ruminococcaceae; s__unidentified_Ruminococcaceae
ASV_23380	0.0	36.0	0.0	54.0	0.0	0.0	d__Bacteria; p__Firmicutes; c__Clostridia; o__Clostridiales; f__Clostridiaceae; g__SMB53; s__unidentified_SMB53
ASV_7978	0.0	0.0	0.0	18.0	0.0	0.0	d__Bacteria; p__Firmicutes; c__Clostridia; o__Clostridiales; f__Clostridiaceae; g__Proteiniclasticum; s__unidentified_Proteiniclasticum
ASV_13089	0.0	0.0	0.0	14.0	68.0	19.0	d__Bacteria; p__Actinobacteria; c__Actinobacteria; o__Micrococcales; f__unidentified_Micrococcales; g__unidentified_Micrococcales; s__unidentified_Micrococcales
ASV_13641	0.0	0.0	0.0	22.0	48.0	25.0	d__Bacteria; p__Actinobacteria; c__Actinobacteria; o__Actinomycetales; f__Nocardioidaceae; g__Nocardioides; s__unidentified_Nocardioides
ASV_13259	20.0	15.0	68.0	0.0	0.0	0.0	d__Bacteria; p__Chlamydiae; c__Chlamydiia; o__Chlamydiales; f__Parachlamydiaceae; g__Candidatus_Protochlamydia; s__unidentified_Candidatus_Protochlamydia
ASV_1187	25.0	8.0	0.0	0.0	0.0	22.0	d__Bacteria; p__Bacteroidetes; c__Bacteroidia; o__Bacteroidales; f__Bacteroidaceae; g__Bacteroides; s__unclassified_Bacteroides
ASV_13081	9.0	55.0	29.0	5.0	0.0	5.0	d__Bacteria; p__Bacteroidetes; c__Bacteroidia; o__Bacteroidales; f__S24-7; g__unidentified_S24-7; s__unidentified_S24-7
ASV_26213	15.0	14.0	0.0	14.0	0.0	18.0	d__Bacteria; p__Firmicutes; c__Clostridia; o__Clostridiales; f__Lachnospiraceae; g__unidentified_Lachnospiraceae; s__unidentified_Lachnospiraceae
ASV_11329	4.0	14.0	0.0	12.0	0.0	13.0	d__Bacteria; p__Firmicutes; c__Clostridia; o__Clostridiales; f__[Mogibacteriaceae]; g__unidentified_[Mogibacteriaceae]; s__unidentified_[Mogibacteriaceae]
ASV_34	0.0	0.0	69.0	0.0	0.0	0.0	d__Bacteria; p__Firmicutes; c__Clostridia; o__Clostridiales; f__Lachnospiraceae; g__unidentified_Lachnospiraceae; s__unidentified_Lachnospiraceae
ASV_13223	0.0	0.0	0.0	0.0	97.0	0.0	d__Bacteria; p__Bacteroidetes; c__Flavobacteriia; o__Flavobacteriales; f__Flavobacteriaceae; g__Flavobacterium; s__Flavobacterium_frigidarium
ASV_20288	0.0	0.0	0.0	0.0	25.0	0.0	d__Bacteria; p__Proteobacteria; c__Gammaproteobacteria; o__Pseudomonadales; f__Pseudomonadaceae; g__Pseudomonas; s__Pseudomonas_veronii
ASV_23885	39.0	0.0	0.0	0.0	0.0	15.0	d__Bacteria; p__Firmicutes; c__Clostridia; o__Clostridiales; f__Ruminococcaceae; g__Ruminococcus; s__unidentified_Ruminococcus
ASV_3049	0.0	0.0	0.0	1.0	75.0	0.0	d__Bacteria; p__Firmicutes; c__Clostridia; o__Clostridiales; f__Ruminococcaceae; g__Ruminococcus; s__unidentified_Ruminococcus
ASV_21538	0.0	0.0	0.0	40.0	36.0	0.0	d__Bacteria; p__TM7; c__TM7-1; o__unidentified_TM7-1; f__unidentified_TM7-1; g__unidentified_TM7-1; s__unidentified_TM7-1
ASV_8617	18.0	28.0	0.0	0.0	25.0	10.0	d__Bacteria; p__Firmicutes; c__Clostridia; o__Clostridiales; f__Ruminococcaceae; g__unidentified_Ruminococcaceae; s__unidentified_Ruminococcaceae
ASV_18671	16.0	16.0	16.0	0.0	0.0	0.0	d__Bacteria; p__Firmicutes; c__Clostridia; o__Clostridiales; f__Ruminococcaceae; g__Oscillospira; s__unidentified_Oscillospira
ASV_98	0.0	12.0	73.0	0.0	0.0	0.0	d__Bacteria; p__Firmicutes; c__Clostridia; o__Clostridiales; f__unidentified_Clostridiales; g__unidentified_Clostridiales; s__unidentified_Clostridiales
ASV_18663	0.0	0.0	52.0	0.0	0.0	0.0	d__Bacteria; p__Firmicutes; c__Clostridia; o__Clostridiales; f__Lachnospiraceae; g__unidentified_Lachnospiraceae; s__unidentified_Lachnospiraceae
ASV_5499	0.0	0.0	4.0	20.0	0.0	10.0	d__Bacteria; p__Firmicutes; c__Clostridia; o__Clostridiales; f__Christensenellaceae; g__unidentified_Christensenellaceae; s__unidentified_Christensenellaceae
ASV_17584	0.0	0.0	0.0	14.0	0.0	53.0	d__Bacteria; p__Firmicutes; c__Bacilli; o__Lactobacillales; f__Lactobacillaceae; g__Lactobacillus; s__unclassified_Lactobacillus
ASV_17224	9.0	6.0	11.0	0.0	17.0	23.0	d__Bacteria; p__Firmicutes; c__Erysipelotrichi; o__Erysipelotrichales; f__Erysipelotrichaceae; g__L7A_E11; s__unidentified_L7A_E11
ASV_10457	0.0	0.0	0.0	9.0	35.0	33.0	d__Bacteria; p__Proteobacteria; c__Gammaproteobacteria; o__Xanthomonadales; f__Xanthomonadaceae; g__unidentified_Xanthomonadaceae; s__unidentified_Xanthomonadaceae
ASV_22739	4.0	8.0	0.0	4.0	0.0	2.0	d__Bacteria; p__Actinobacteria; c__Coriobacteriia; o__Coriobacteriales; f__Coriobacteriaceae; g__Adlercreutzia; s__unidentified_Adlercreutzia
ASV_21074	0.0	5.0	14.0	13.0	14.0	12.0	d__Bacteria; p__Firmicutes; c__Clostridia; o__Clostridiales; f__[Mogibacteriaceae]; g__unidentified_[Mogibacteriaceae]; s__unidentified_[Mogibacteriaceae]
ASV_11763	0.0	0.0	0.0	13.0	30.0	24.0	d__Bacteria; p__Proteobacteria; c__Alphaproteobacteria; o__Rhodospirillales; f__Acetobacteraceae; g__unidentified_Acetobacteraceae; s__unidentified_Acetobacteraceae
ASV_12234	0.0	0.0	0.0	4.0	19.0	0.0	d__Bacteria; p__Proteobacteria; c__Alphaproteobacteria; o__Rhizobiales; f__Bradyrhizobiaceae; g__unclassified_Bradyrhizobiaceae; s__unclassified_Bradyrhizobiaceae
ASV_25720	0.0	0.0	0.0	0.0	48.0	49.0	d__Bacteria; p__Firmicutes; c__Clostridia; o__Clostridiales; f__Clostridiaceae; g__Clostridium; s__Clostridium_bowmanii
ASV_19274	10.0	5.0	10.0	0.0	0.0	6.0	d__Bacteria; p__Bacteroidetes; c__Bacteroidia; o__Bacteroidales; f__Bacteroidaceae; g__Bacteroides; s__unidentified_Bacteroides
ASV_11813	19.0	79.0	0.0	0.0	11.0	0.0	d__Bacteria; p__Firmicutes; c__Clostridia; o__Clostridiales; f__Ruminococcaceae; g__Oscillospira; s__unidentified_Oscillospira
ASV_8342	0.0	0.0	0.0	0.0	0.0	99.0	d__Bacteria; p__Chloroflexi; c__Thermomicrobia; o__unidentified_Thermomicrobia; f__unidentified_Thermomicrobia; g__unidentified_Thermomicrobia; s__unidentified_Thermomicrobia
ASV_8360	0.0	14.0	9.0	0.0	0.0	0.0	d__Bacteria; p__Bacteroidetes; c__Bacteroidia; o__Bacteroidales; f__Porphyromonadaceae; g__Parabacteroides; s__unidentified_Parabacteroides
ASV_25580	0.0	0.0	0.0	29.0	42.0	0.0	d__Bacteria; p__Actinobacteria; c__Actinobacteria; o__Actinomycetales; f__Sporichthyaceae; g__unidentified_Sporichthyaceae; s__unidentified_Sporichthyaceae
ASV_22213	0.0	0.0	0.0	27.0	40.0	0.0	d__Bacteria; p__Acidobacteria; c__Solibacteres; o__Solibacterales; f__Solibacteraceae; g__unidentified_Solibacteraceae; s__unidentified_Solibacteraceae
ASV_345	0.0	0.0	0.0	43.0	0.0	16.0	d__Bacteria; p__Firmicutes; c__Clostridia; o__Clostridiales; f__Ruminococcaceae; g__unidentified_Ruminococcaceae; s__unidentified_Ruminococcaceae
ASV_25816	0.0	34.0	0.0	21.0	23.0	0.0	d__Bacteria; p__Firmicutes; c__Clostridia; o__Clostridiales; f__unidentified_Clostridiales; g__unidentified_Clostridiales; s__unidentified_Clostridiales
ASV_25893	0.0	37.0	32.0	17.0	0.0	0.0	d__Bacteria; p__Firmicutes; c__Clostridia; o__Clostridiales; f__unidentified_Clostridiales; g__unidentified_Clostridiales; s__unidentified_Clostridiales
ASV_23736	0.0	5.0	20.0	0.0	18.0	0.0	d__Bacteria; p__Proteobacteria; c__Betaproteobacteria; o__Burkholderiales; f__Alcaligenaceae; g__Sutterella; s__unidentified_Sutterella
ASV_16359	0.0	0.0	0.0	0.0	33.0	7.0	d__Bacteria; p__Proteobacteria; c__Alphaproteobacteria; o__Rhizobiales; f__Methylobacteriaceae; g__unidentified_Methylobacteriaceae; s__unidentified_Methylobacteriaceae
ASV_4331	0.0	0.0	0.0	0.0	0.0	28.0	d__Bacteria; p__Proteobacteria; c__Betaproteobacteria; o__SC-I-84; f__unidentified_SC-I-84; g__unidentified_SC-I-84; s__unidentified_SC-I-84
ASV_3532	0.0	0.0	0.0	31.0	20.0	30.0	d__Bacteria; p__Proteobacteria; c__Alphaproteobacteria; o__Rickettsiales; f__mitochondria; g__Silene; s__Silene_vulgaris
ASV_16027	43.0	0.0	0.0	0.0	0.0	17.0	d__Bacteria; p__Bacteroidetes; c__Bacteroidia; o__Bacteroidales; f__BS11; g__unidentified_BS11; s__unidentified_BS11
ASV_2284	42.0	37.0	0.0	0.0	0.0	0.0	d__Bacteria; p__Firmicutes; c__Clostridia; o__Clostridiales; f__Ruminococcaceae; g__unidentified_Ruminococcaceae; s__unidentified_Ruminococcaceae
ASV_16726	0.0	0.0	14.0	17.0	29.0	0.0	d__Bacteria; p__Bacteroidetes; c__Flavobacteriia; o__Flavobacteriales; f__Flavobacteriaceae; g__Flavobacterium; s__unidentified_Flavobacterium
ASV_21878	0.0	0.0	0.0	0.0	26.0	0.0	d__Bacteria; p__Firmicutes; c__Clostridia; o__Clostridiales; f__Ruminococcaceae; g__Oscillospira; s__unidentified_Oscillospira
ASV_16534	20.0	13.0	8.0	0.0	0.0	24.0	d__Bacteria; p__Firmicutes; c__Bacilli; o__Lactobacillales; f__Leuconostocaceae; g__Weissella; s__Weissella_paramesenteroides
ASV_22291	24.0	0.0	14.0	0.0	7.0	28.0	d__Bacteria; p__Firmicutes; c__Clostridia; o__Clostridiales; f__Ruminococcaceae; g__Oscillospira; s__unidentified_Oscillospira
ASV_610	38.0	0.0	0.0	0.0	32.0	0.0	d__Bacteria; p__Proteobacteria; c__Alphaproteobacteria; o__Caulobacterales; f__Caulobacteraceae; g__Brevundimonas; s__unidentified_Brevundimonas
ASV_5639	0.0	0.0	0.0	21.0	0.0	0.0	d__Bacteria; p__Firmicutes; c__Clostridia; o__Clostridiales; f__unclassified_Clostridiales; g__unclassified_Clostridiales; s__unclassified_Clostridiales
ASV_3157	77.0	11.0	0.0	0.0	0.0	0.0	d__Bacteria; p__Firmicutes; c__Clostridia; o__Clostridiales; f__Ruminococcaceae; g__Oscillospira; s__unidentified_Oscillospira
ASV_14229	0.0	5.0	0.0	0.0	11.0	20.0	d__Bacteria; p__[Thermi]; c__Deinococci; o__Deinococcales; f__Deinococcaceae; g__Deinococcus; s__unidentified_Deinococcus
ASV_7287	0.0	0.0	0.0	23.0	0.0	0.0	d__Bacteria; p__Firmicutes; c__Clostridia; o__Clostridiales; f__Peptostreptococcaceae; g__unidentified_Peptostreptococcaceae; s__unidentified_Peptostreptococcaceae
ASV_2214	0.0	0.0	0.0	21.0	44.0	0.0	d__Bacteria; p__Firmicutes; c__Bacilli; o__Bacillales; f__Bacillaceae; g__Bacillus; s__unidentified_Bacillus
ASV_5156	0.0	0.0	0.0	7.0	0.0	0.0	d__Bacteria; p__Firmicutes; c__Clostridia; o__Clostridiales; f__Ruminococcaceae; g__unidentified_Ruminococcaceae; s__unidentified_Ruminococcaceae
ASV_21596	0.0	0.0	0.0	0.0	0.0	37.0	d__Bacteria; p__Bacteroidetes; c__Bacteroidia; o__Bacteroidales; f__Prevotellaceae; g__Prevotella; s__unidentified_Prevotella
ASV_14011	13.0	0.0	10.0	0.0	0.0	29.0	d__Bacteria; p__Firmicutes; c__Clostridia; o__Clostridiales; f__Ruminococcaceae; g__Ruminococcus; s__unidentified_Ruminococcus
ASV_1886	3.0	0.0	21.0	11.0	13.0	25.0	d__Bacteria; p__Firmicutes; c__Clostridia; o__Clostridiales; f__Lachnospiraceae; g__unidentified_Lachnospiraceae; s__unidentified_Lachnospiraceae
ASV_18774	37.0	0.0	77.0	0.0	0.0	0.0	d__Bacteria; p__Firmicutes; c__unclassified_Firmicutes; o__unclassified_Firmicutes; f__unclassified_Firmicutes; g__unclassified_Firmicutes; s__unclassified_Firmicutes
ASV_10558	0.0	21.0	54.0	0.0	13.0	0.0	d__Bacteria; p__Firmicutes; c__Clostridia; o__Clostridiales; f__Ruminococcaceae; g__unidentified_Ruminococcaceae; s__unidentified_Ruminococcaceae
ASV_24205	0.0	0.0	0.0	0.0	0.0	99.0	d__Bacteria; p__Actinobacteria; c__Actinobacteria; o__Actinomycetales; f__Micrococcaceae; g__Arthrobacter; s__unclassified_Arthrobacter
ASV_26260	28.0	0.0	0.0	15.0	0.0	21.0	d__Bacteria; p__Firmicutes; c__Clostridia; o__Clostridiales; f__Ruminococcaceae; g__unidentified_Ruminococcaceae; s__unidentified_Ruminococcaceae
ASV_8620	57.0	11.0	0.0	0.0	0.0	6.0	d__Bacteria; p__Firmicutes; c__Clostridia; o__Clostridiales; f__Ruminococcaceae; g__Ruminococcus; s__unidentified_Ruminococcus
ASV_18304	17.0	11.0	58.0	0.0	4.0	0.0	d__Bacteria; p__Tenericutes; c__Mollicutes; o__RF39; f__unidentified_RF39; g__unidentified_RF39; s__unidentified_RF39
ASV_17155	0.0	86.0	0.0	0.0	0.0	0.0	d__Bacteria; p__Firmicutes; c__Clostridia; o__Clostridiales; f__Ruminococcaceae; g__Ruminococcus; s__Ruminococcus_callidus
ASV_10373	0.0	0.0	0.0	26.0	0.0	30.0	d__Bacteria; p__Actinobacteria; c__Actinobacteria; o__Actinomycetales; f__Micromonosporaceae; g__unclassified_Micromonosporaceae; s__unclassified_Micromonosporaceae
ASV_4156	0.0	9.0	13.0	3.0	12.0	31.0	d__Bacteria; p__Bacteroidetes; c__Bacteroidia; o__Bacteroidales; f__Prevotellaceae; g__Prevotella; s__unidentified_Prevotella
ASV_11112	9.0	0.0	0.0	0.0	19.0	4.0	d__Bacteria; p__Bacteroidetes; c__Bacteroidia; o__Bacteroidales; f__S24-7; g__unidentified_S24-7; s__unidentified_S24-7
ASV_11672	0.0	0.0	0.0	41.0	10.0	0.0	d__Bacteria; p__Tenericutes; c__Mollicutes; o__RF39; f__unidentified_RF39; g__unidentified_RF39; s__unidentified_RF39
ASV_518	0.0	0.0	0.0	0.0	0.0	83.0	d__Bacteria; p__Actinobacteria; c__Actinobacteria; o__Bifidobacteriales; f__Bifidobacteriaceae; g__Bifidobacterium; s__Bifidobacterium_longum
ASV_14767	8.0	0.0	0.0	8.0	7.0	22.0	d__Bacteria; p__Firmicutes; c__Clostridia; o__Clostridiales; f__Ruminococcaceae; g__unidentified_Ruminococcaceae; s__unidentified_Ruminococcaceae
ASV_3022	0.0	0.0	0.0	0.0	0.0	13.0	d__Bacteria; p__Firmicutes; c__Bacilli; o__Lactobacillales; f__Streptococcaceae; g__Streptococcus; s__Streptococcus_alactolyticus
ASV_118	0.0	0.0	0.0	0.0	80.0	0.0	d__Bacteria; p__Firmicutes; c__Clostridia; o__Clostridiales; f__Ruminococcaceae; g__Oscillospira; s__unidentified_Oscillospira
ASV_624	14.0	0.0	0.0	9.0	3.0	0.0	d__Bacteria; p__Firmicutes; c__Clostridia; o__Clostridiales; f__unclassified_Clostridiales; g__unclassified_Clostridiales; s__unclassified_Clostridiales
ASV_2294	0.0	0.0	0.0	9.0	0.0	65.0	d__Bacteria; p__Actinobacteria; c__Acidimicrobiia; o__Acidimicrobiales; f__EB1017; g__unidentified_EB1017; s__unidentified_EB1017
ASV_20771	0.0	0.0	0.0	0.0	0.0	21.0	d__Bacteria; p__Firmicutes; c__Clostridia; o__Clostridiales; f__Lachnospiraceae; g__[Ruminococcus]; s__[Ruminococcus]_gnavus
ASV_3017	47.0	0.0	0.0	0.0	0.0	0.0	d__Bacteria; p__Chlamydiae; c__Chlamydiia; o__unidentified_Chlamydiia; f__unidentified_Chlamydiia; g__unidentified_Chlamydiia; s__unidentified_Chlamydiia
ASV_22280	0.0	0.0	0.0	14.0	6.0	0.0	d__Bacteria; p__Proteobacteria; c__Alphaproteobacteria; o__Rhizobiales; f__Rhizobiaceae; g__Agrobacterium; s__unidentified_Agrobacterium
ASV_17126	0.0	0.0	0.0	0.0	61.0	29.0	d__Bacteria; p__Acidobacteria; c__Solibacteres; o__Solibacterales; f__Solibacteraceae; g__Candidatus_Solibacter; s__unidentified_Candidatus_Solibacter
ASV_22606	0.0	0.0	0.0	14.0	0.0	67.0	d__Bacteria; p__Firmicutes; c__Bacilli; o__Bacillales; f__Staphylococcaceae; g__Staphylococcus; s__unclassified_Staphylococcus
ASV_11926	19.0	0.0	0.0	1.0	0.0	13.0	d__Bacteria; p__Bacteroidetes; c__Bacteroidia; o__Bacteroidales; f__Prevotellaceae; g__Prevotella; s__unidentified_Prevotella
ASV_21049	84.0	0.0	0.0	0.0	0.0	0.0	d__Bacteria; p__Firmicutes; c__Clostridia; o__Clostridiales; f__Clostridiaceae; g__Clostridium; s__unidentified_Clostridium
ASV_5720	0.0	10.0	0.0	0.0	3.0	0.0	d__Bacteria; p__Firmicutes; c__Bacilli; o__Bacillales; f__[Exiguobacteraceae]; g__unidentified_[Exiguobacteraceae]; s__unidentified_[Exiguobacteraceae]
ASV_7133	0.0	11.0	6.0	0.0	60.0	0.0	d__Bacteria; p__Bacteroidetes; c__Bacteroidia; o__Bacteroidales; f__[Paraprevotellaceae]; g__CF231; s__unidentified_CF231
ASV_18223	0.0	0.0	0.0	0.0	33.0	27.0	d__Bacteria; p__Actinobacteria; c__Actinobacteria; o__Actinomycetales; f__Micrococcaceae; g__Arthrobacter; s__unclassified_Arthrobacter
ASV_7580	0.0	0.0	0.0	9.0	49.0	29.0	d__Bacteria; p__Firmicutes; c__Bacilli; o__Bacillales; f__unclassified_Bacillales; g__unclassified_Bacillales; s__unclassified_Bacillales
ASV_11552	45.0	19.0	0.0	10.0	0.0	0.0	d__Bacteria; p__Firmicutes; c__Clostridia; o__Clostridiales; f__Lachnospiraceae; g__[Ruminococcus]; s__[Ruminococcus]_gnavus
ASV_7729	5.0	0.0	0.0	0.0	17.0	25.0	d__Bacteria; p__Firmicutes; c__Clostridia; o__Clostridiales; f__Christensenellaceae; g__unidentified_Christensenellaceae; s__unidentified_Christensenellaceae
ASV_3437	0.0	0.0	0.0	17.0	0.0	23.0	d__Bacteria; p__Firmicutes; c__Bacilli; o__Bacillales; f__Bacillaceae; g__Bacillus; s__unclassified_Bacillus
ASV_17644	0.0	0.0	0.0	0.0	61.0	26.0	d__Bacteria; p__Proteobacteria; c__Alphaproteobacteria; o__Sphingomonadales; f__Sphingomonadaceae; g__Sphingomonas; s__unidentified_Sphingomonas
ASV_24436	5.0	0.0	0.0	7.0	0.0	47.0	d__Bacteria; p__Firmicutes; c__Bacilli; o__Lactobacillales; f__Lactobacillaceae; g__Lactobacillus; s__unidentified_Lactobacillus
ASV_6442	0.0	7.0	0.0	0.0	0.0	0.0	d__Bacteria; p__Bacteroidetes; c__Bacteroidia; o__Bacteroidales; f__unidentified_Bacteroidales; g__unidentified_Bacteroidales; s__unidentified_Bacteroidales
ASV_21433	0.0	0.0	0.0	0.0	0.0	25.0	d__Bacteria; p__Firmicutes; c__Clostridia; o__Clostridiales; f__Lachnospiraceae; g__Coprococcus; s__unidentified_Coprococcus
ASV_481	41.0	18.0	22.0	0.0	0.0	0.0	d__Bacteria; p__Bacteroidetes; c__Bacteroidia; o__Bacteroidales; f__S24-7; g__unidentified_S24-7; s__unidentified_S24-7
ASV_17414	0.0	0.0	11.0	0.0	20.0	24.0	d__Bacteria; p__Bacteroidetes; c__Flavobacteriia; o__Flavobacteriales; f__[Weeksellaceae]; g__unidentified_[Weeksellaceae]; s__unidentified_[Weeksellaceae]
ASV_25499	0.0	0.0	0.0	10.0	33.0	25.0	d__Bacteria; p__Actinobacteria; c__Actinobacteria; o__Actinomycetales; f__Streptomycetaceae; g__Streptomyces; s__Streptomyces_reticuliscabiei
ASV_18228	0.0	0.0	11.0	0.0	7.0	56.0	d__Bacteria; p__Proteobacteria; c__Gammaproteobacteria; o__Xanthomonadales; f__Xanthomonadaceae; g__Pseudoxanthomonas; s__Pseudoxanthomonas_taiwanensis
ASV_17826	0.0	0.0	9.0	0.0	17.0	0.0	d__Bacteria; p__Firmicutes; c__Clostridia; o__Clostridiales; f__Ruminococcaceae; g__unidentified_Ruminococcaceae; s__unidentified_Ruminococcaceae
ASV_9084	0.0	0.0	0.0	16.0	9.0	14.0	d__Bacteria; p__Proteobacteria; c__Epsilonproteobacteria; o__Campylobacterales; f__Helicobacteraceae; g__Helicobacter; s__Helicobacter_pylori
ASV_20828	0.0	0.0	0.0	0.0	0.0	49.0	d__Bacteria; p__WPS-2; c__unidentified_WPS-2; o__unidentified_WPS-2; f__unidentified_WPS-2; g__unidentified_WPS-2; s__unidentified_WPS-2
ASV_7771	11.0	0.0	15.0	0.0	0.0	0.0	d__Bacteria; p__Firmicutes; c__Clostridia; o__Clostridiales; f__unidentified_Clostridiales; g__unidentified_Clostridiales; s__unidentified_Clostridiales
ASV_19677	22.0	0.0	38.0	0.0	0.0	0.0	d__Bacteria; p__Firmicutes; c__Clostridia; o__Clostridiales; f__Ruminococcaceae; g__Oscillospira; s__unidentified_Oscillospira
ASV_4137	0.0	0.0	16.0	0.0	0.0	5.0	d__Bacteria; p__Firmicutes; c__Clostridia; o__Clostridiales; f__Ruminococcaceae; g__unidentified_Ruminococcaceae; s__unidentified_Ruminococcaceae
ASV_5217	0.0	0.0	0.0	25.0	0.0	30.0	d__Bacteria; p__Bacteroidetes; c__Flavobacteriia; o__Flavobacteriales; f__Flavobacteriaceae; g__Flavobacterium; s__Flavobacterium_frigidarium
ASV_6525	9.0	0.0	24.0	0.0	17.0	0.0	d__Bacteria; p__Proteobacteria; c__Gammaproteobacteria; o__Pseudomonadales; f__Pseudomonadaceae; g__Pseudomonas; s__unclassified_Pseudomonas
ASV_1869	0.0	0.0	0.0	2.0	48.0	0.0	d__Bacteria; p__Proteobacteria; c__Betaproteobacteria; o__SC-I-84; f__unidentified_SC-I-84; g__unidentified_SC-I-84; s__unidentified_SC-I-84
ASV_13754	6.0	27.0	0.0	0.0	0.0	0.0	d__Bacteria; p__Firmicutes; c__Erysipelotrichi; o__Erysipelotrichales; f__Erysipelotrichaceae; g__unidentified_Erysipelotrichaceae; s__unidentified_Erysipelotrichaceae
ASV_13712	10.0	0.0	0.0	0.0	0.0	66.0	d__Bacteria; p__Bacteroidetes; c__Bacteroidia; o__Bacteroidales; f__unidentified_Bacteroidales; g__unidentified_Bacteroidales; s__unidentified_Bacteroidales
ASV_16341	5.0	0.0	26.0	9.0	0.0	0.0	d__Bacteria; p__Firmicutes; c__Clostridia; o__Clostridiales; f__Lachnospiraceae; g__Blautia; s__unidentified_Blautia
ASV_3190	0.0	7.0	0.0	0.0	26.0	27.0	d__Bacteria; p__Bacteroidetes; c__Bacteroidia; o__Bacteroidales; f__S24-7; g__unidentified_S24-7; s__unidentified_S24-7
ASV_7747	0.0	0.0	0.0	17.0	3.0	6.0	d__Bacteria; p__Firmicutes; c__Clostridia; o__Clostridiales; f__unidentified_Clostridiales; g__unidentified_Clostridiales; s__unidentified_Clostridiales
ASV_15052	0.0	0.0	0.0	0.0	0.0	23.0	d__Bacteria; p__Firmicutes; c__Clostridia; o__Clostridiales; f__Lachnospiraceae; g__unclassified_Lachnospiraceae; s__unclassified_Lachnospiraceae
ASV_22778	8.0	0.0	11.0	0.0	0.0	0.0	d__Bacteria; p__Firmicutes; c__Clostridia; o__Clostridiales; f__unclassified_Clostridiales; g__unclassified_Clostridiales; s__unclassified_Clostridiales
ASV_15375	7.0	49.0	0.0	0.0	0.0	0.0	d__Bacteria; p__Firmicutes; c__Clostridia; o__Clostridiales; f__Ruminococcaceae; g__Oscillospira; s__unidentified_Oscillospira
ASV_10523	17.0	12.0	0.0	0.0	9.0	41.0	d__Bacteria; p__Firmicutes; c__Clostridia; o__Clostridiales; f__Ruminococcaceae; g__unidentified_Ruminococcaceae; s__unidentified_Ruminococcaceae
ASV_24785	0.0	0.0	18.0	7.0	0.0	13.0	d__Bacteria; p__Firmicutes; c__Clostridia; o__Clostridiales; f__unidentified_Clostridiales; g__unidentified_Clostridiales; s__unidentified_Clostridiales
ASV_12884	0.0	0.0	0.0	5.0	45.0	0.0	d__Bacteria; p__Firmicutes; c__Clostridia; o__Clostridiales; f__Ruminococcaceae; g__Oscillospira; s__unidentified_Oscillospira
ASV_9268	0.0	0.0	0.0	11.0	25.0	21.0	d__Bacteria; p__Proteobacteria; c__Alphaproteobacteria; o__Rhizobiales; f__Bradyrhizobiaceae; g__Bosea; s__Bosea_genosp.
ASV_16447	4.0	20.0	55.0	0.0	2.0	0.0	d__Bacteria; p__Bacteroidetes; c__Bacteroidia; o__Bacteroidales; f__S24-7; g__unidentified_S24-7; s__unidentified_S24-7
ASV_9810	96.0	0.0	0.0	0.0	0.0	0.0	d__Bacteria; p__Actinobacteria; c__Coriobacteriia; o__Coriobacteriales; f__Coriobacteriaceae; g__Adlercreutzia; s__unidentified_Adlercreutzia
ASV_22226	0.0	96.0	0.0	0.0	0.0	0.0	d__Bacteria; p__Firmicutes; c__Clostridia; o__Clostridiales; f__unidentified_Clostridiales; g__unidentified_Clostridiales; s__unidentified_Clostridiales
ASV_10601	0.0	9.0	20.0	6.0	0.0	0.0	d__Bacteria; p__Firmicutes; c__Clostridia; o__Clostridiales; f__Lachnospiraceae; g__unidentified_Lachnospiraceae; s__unidentified_Lachnospiraceae
ASV_17301	0.0	0.0	0.0	41.0	0.0	28.0	d__Bacteria; p__Actinobacteria; c__Acidimicrobiia; o__Acidimicrobiales; f__EB1017; g__unidentified_EB1017; s__unidentified_EB1017
ASV_22033	0.0	0.0	0.0	0.0	12.0	61.0	d__Bacteria; p__Chloroflexi; c__Ellin6529; o__unidentified_Ellin6529; f__unidentified_Ellin6529; g__unidentified_Ellin6529; s__unidentified_Ellin6529
ASV_15351	0.0	0.0	0.0	0.0	0.0	77.0	d__Bacteria; p__Firmicutes; c__Bacilli; o__Lactobacillales; f__Streptococcaceae; g__Lactococcus; s__unidentified_Lactococcus
ASV_19411	0.0	15.0	0.0	4.0	0.0	0.0	d__Bacteria; p__Tenericutes; c__Mollicutes; o__RF39; f__unidentified_RF39; g__unidentified_RF39; s__unidentified_RF39
ASV_10013	0.0	0.0	105.0	0.0	0.0	0.0	d__Bacteria; p__Actinobacteria; c__Actinobacteria; o__Actinomycetales; f__Microbacteriaceae; g__Leucobacter; s__unidentified_Leucobacter
ASV_7274	0.0	0.0	33.0	13.0	0.0	0.0	d__Bacteria; p__Firmicutes; c__Clostridia; o__Clostridiales; f__Ruminococcaceae; g__unidentified_Ruminococcaceae; s__unidentified_Ruminococcaceae
ASV_18287	0.0	0.0	0.0	14.0	42.0	0.0	d__Bacteria; p__Firmicutes; c__Clostridia; o__Clostridiales; f__Ruminococcaceae; g__Faecalibacterium; s__Faecalibacterium_prausnitzii
ASV_23883	0.0	0.0	0.0	21.0	21.0	16.0	d__Bacteria; p__Proteobacteria; c__Gammaproteobacteria; o__Enterobacteriales; f__Enterobacteriaceae; g__unclassified_Enterobacteriaceae; s__unclassified_Enterobacteriaceae
ASV_11836	0.0	0.0	21.0	4.0	21.0	9.0	d__Bacteria; p__Firmicutes; c__Clostridia; o__Clostridiales; f__Ruminococcaceae; g__unidentified_Ruminococcaceae; s__unidentified_Ruminococcaceae
ASV_2497	0.0	0.0	0.0	0.0	23.0	19.0	d__Bacteria; p__Firmicutes; c__Clostridia; o__Clostridiales; f__Ruminococcaceae; g__unidentified_Ruminococcaceae; s__unidentified_Ruminococcaceae
ASV_13346	0.0	0.0	0.0	1.0	0.0	32.0	d__Bacteria; p__Firmicutes; c__Clostridia; o__Clostridiales; f__Clostridiaceae; g__Proteiniclasticum; s__unidentified_Proteiniclasticum
ASV_13352	0.0	0.0	0.0	0.0	24.0	52.0	d__Bacteria; p__Proteobacteria; c__Alphaproteobacteria; o__Sphingomonadales; f__Sphingomonadaceae; g__Kaistobacter; s__unidentified_Kaistobacter
ASV_19145	0.0	0.0	0.0	0.0	39.0	26.0	d__Bacteria; p__Proteobacteria; c__Alphaproteobacteria; o__Rhizobiales; f__Hyphomicrobiaceae; g__Rhodoplanes; s__unidentified_Rhodoplanes
ASV_13801	0.0	0.0	0.0	16.0	62.0	0.0	d__Bacteria; p__Actinobacteria; c__Actinobacteria; o__Actinomycetales; f__Streptomycetaceae; g__Streptomyces; s__Streptomyces_lanatus
ASV_11761	0.0	0.0	0.0	0.0	35.0	38.0	d__Bacteria; p__Gemmatimonadetes; c__Gemmatimonadetes; o__Ellin5290; f__unidentified_Ellin5290; g__unidentified_Ellin5290; s__unidentified_Ellin5290
ASV_26051	0.0	35.0	0.0	0.0	13.0	0.0	d__Bacteria; p__Bacteroidetes; c__Bacteroidia; o__Bacteroidales; f__Rikenellaceae; g__unidentified_Rikenellaceae; s__unidentified_Rikenellaceae
ASV_20793	0.0	12.0	0.0	0.0	46.0	22.0	d__Bacteria; p__Proteobacteria; c__Alphaproteobacteria; o__Rhodospirillales; f__Rhodospirillaceae; g__Azospirillum; s__unclassified_Azospirillum
ASV_10524	0.0	0.0	9.0	0.0	0.0	0.0	d__Bacteria; p__Bacteroidetes; c__Bacteroidia; o__Bacteroidales; f__Bacteroidaceae; g__Bacteroides; s__Bacteroides_acidifaciens
ASV_18869	0.0	0.0	18.0	0.0	0.0	0.0	d__Bacteria; p__Proteobacteria; c__Gammaproteobacteria; o__Pseudomonadales; f__Moraxellaceae; g__Acinetobacter; s__Acinetobacter_johnsonii
ASV_2705	15.0	0.0	7.0	0.0	0.0	5.0	d__Bacteria; p__Firmicutes; c__Erysipelotrichi; o__Erysipelotrichales; f__Erysipelotrichaceae; g__unidentified_Erysipelotrichaceae; s__unidentified_Erysipelotrichaceae
ASV_26091	10.0	0.0	0.0	0.0	45.0	5.0	d__Bacteria; p__Firmicutes; c__Clostridia; o__Clostridiales; f__Ruminococcaceae; g__unidentified_Ruminococcaceae; s__unidentified_Ruminococcaceae
ASV_11467	0.0	17.0	32.0	1.0	0.0	0.0	d__Bacteria; p__Firmicutes; c__Clostridia; o__Clostridiales; f__unidentified_Clostridiales; g__unidentified_Clostridiales; s__unidentified_Clostridiales
ASV_10632	0.0	0.0	5.0	0.0	0.0	0.0	d__Bacteria; p__Firmicutes; c__Clostridia; o__Clostridiales; f__unidentified_Clostridiales; g__unidentified_Clostridiales; s__unidentified_Clostridiales
ASV_13149	0.0	0.0	0.0	13.0	31.0	0.0	d__Bacteria; p__Proteobacteria; c__Gammaproteobacteria; o__Xanthomonadales; f__Xanthomonadaceae; g__unidentified_Xanthomonadaceae; s__unidentified_Xanthomonadaceae
ASV_19004	0.0	0.0	0.0	10.0	0.0	19.0	d__Bacteria; p__Proteobacteria; c__Alphaproteobacteria; o__Ellin329; f__unidentified_Ellin329; g__unidentified_Ellin329; s__unidentified_Ellin329
ASV_5126	0.0	0.0	0.0	0.0	39.0	0.0	d__Bacteria; p__Proteobacteria; c__Betaproteobacteria; o__Burkholderiales; f__Alcaligenaceae; g__Castellaniella; s__Castellaniella_defragrans
ASV_16411	7.0	0.0	8.0	0.0	15.0	15.0	d__Bacteria; p__Spirochaetes; c__Spirochaetes; o__Spirochaetales; f__Spirochaetaceae; g__Treponema; s__unidentified_Treponema
ASV_24873	3.0	71.0	0.0	1.0	0.0	0.0	d__Bacteria; p__Firmicutes; c__Bacilli; o__Lactobacillales; f__Lactobacillaceae; g__Lactobacillus; s__unidentified_Lactobacillus
ASV_13253	11.0	0.0	24.0	6.0	0.0	11.0	d__Bacteria; p__Firmicutes; c__Bacilli; o__Lactobacillales; f__Lactobacillaceae; g__Lactobacillus; s__unidentified_Lactobacillus
ASV_15732	9.0	13.0	0.0	31.0	0.0	0.0	d__Bacteria; p__Firmicutes; c__Clostridia; o__Clostridiales; f__Ruminococcaceae; g__Ruminococcus; s__Ruminococcus_flavefaciens
ASV_3105	0.0	0.0	11.0	0.0	10.0	0.0	d__Bacteria; p__Firmicutes; c__Clostridia; o__Clostridiales; f__[Mogibacteriaceae]; g__unidentified_[Mogibacteriaceae]; s__unidentified_[Mogibacteriaceae]
ASV_15070	0.0	0.0	0.0	3.0	0.0	72.0	d__Bacteria; p__Firmicutes; c__Clostridia; o__Clostridiales; f__Clostridiaceae; g__Proteiniclasticum; s__unidentified_Proteiniclasticum
ASV_11712	15.0	0.0	0.0	0.0	30.0	0.0	d__Bacteria; p__Firmicutes; c__Bacilli; o__Lactobacillales; f__Lactobacillaceae; g__Lactobacillus; s__unidentified_Lactobacillus
ASV_4079	0.0	22.0	0.0	8.0	13.0	5.0	d__Bacteria; p__Bacteroidetes; c__Bacteroidia; o__Bacteroidales; f__S24-7; g__unidentified_S24-7; s__unidentified_S24-7
ASV_15118	0.0	6.0	5.0	4.0	11.0	0.0	d__Bacteria; p__Firmicutes; c__Clostridia; o__Clostridiales; f__Lachnospiraceae; g__Epulopiscium; s__unidentified_Epulopiscium
ASV_15748	0.0	0.0	0.0	22.0	0.0	16.0	d__Bacteria; p__Bacteroidetes; c__Sphingobacteriia; o__Sphingobacteriales; f__Sphingobacteriaceae; g__unidentified_Sphingobacteriaceae; s__unidentified_Sphingobacteriaceae
ASV_21777	0.0	0.0	0.0	0.0	0.0	50.0	d__Bacteria; p__Proteobacteria; c__Alphaproteobacteria; o__Rhizobiales; f__Hyphomicrobiaceae; g__Devosia; s__unidentified_Devosia
ASV_12860	0.0	0.0	0.0	12.0	39.0	0.0	d__Bacteria; p__Proteobacteria; c__Alphaproteobacteria; o__Rhizobiales; f__Hyphomicrobiaceae; g__Rhodoplanes; s__unidentified_Rhodoplanes
ASV_15220	0.0	0.0	0.0	10.0	49.0	0.0	d__Bacteria; p__Gemmatimonadetes; c__Gemm-1; o__unidentified_Gemm-1; f__unidentified_Gemm-1; g__unidentified_Gemm-1; s__unidentified_Gemm-1
ASV_16347	0.0	0.0	0.0	7.0	27.0	43.0	d__Bacteria; p__Firmicutes; c__Clostridia; o__Clostridiales; f__Ruminococcaceae; g__Ruminococcus; s__Ruminococcus_bromii
ASV_15670	31.0	36.0	0.0	0.0	16.0	0.0	d__Bacteria; p__Firmicutes; c__Clostridia; o__Clostridiales; f__Ruminococcaceae; g__Oscillospira; s__unidentified_Oscillospira
ASV_24260	0.0	46.0	0.0	0.0	0.0	0.0	d__Bacteria; p__Firmicutes; c__Clostridia; o__Clostridiales; f__Lachnospiraceae; g__unclassified_Lachnospiraceae; s__unclassified_Lachnospiraceae
ASV_8348	0.0	0.0	0.0	0.0	34.0	0.0	d__Bacteria; p__Actinobacteria; c__Actinobacteria; o__Actinomycetales; f__Nocardioidaceae; g__unclassified_Nocardioidaceae; s__unclassified_Nocardioidaceae
ASV_10878	0.0	0.0	0.0	49.0	11.0	0.0	d__Bacteria; p__Proteobacteria; c__Deltaproteobacteria; o__Myxococcales; f__unidentified_Myxococcales; g__unidentified_Myxococcales; s__unidentified_Myxococcales
ASV_11949	0.0	0.0	0.0	0.0	23.0	52.0	d__Bacteria; p__Bacteroidetes; c__Bacteroidia; o__Bacteroidales; f__S24-7; g__unidentified_S24-7; s__unidentified_S24-7
ASV_10615	7.0	0.0	0.0	4.0	0.0	22.0	d__Bacteria; p__Proteobacteria; c__Gammaproteobacteria; o__Pseudomonadales; f__Moraxellaceae; g__Enhydrobacter; s__unclassified_Enhydrobacter
ASV_2557	11.0	0.0	29.0	0.0	0.0	0.0	d__Bacteria; p__Firmicutes; c__Clostridia; o__Clostridiales; f__Lachnospiraceae; g__unclassified_Lachnospiraceae; s__unclassified_Lachnospiraceae
ASV_20585	5.0	4.0	25.0	13.0	0.0	0.0	d__Bacteria; p__Firmicutes; c__Clostridia; o__Clostridiales; f__Ruminococcaceae; g__Oscillospira; s__unidentified_Oscillospira
ASV_12034	0.0	0.0	0.0	15.0	0.0	0.0	d__Bacteria; p__Firmicutes; c__Clostridia; o__Clostridiales; f__Ruminococcaceae; g__unidentified_Ruminococcaceae; s__unidentified_Ruminococcaceae
ASV_337	0.0	0.0	0.0	0.0	55.0	0.0	d__Bacteria; p__TM7; c__TM7-1; o__unidentified_TM7-1; f__unidentified_TM7-1; g__unidentified_TM7-1; s__unidentified_TM7-1
ASV_20346	0.0	0.0	0.0	12.0	0.0	0.0	d__Bacteria; p__Actinobacteria; c__Actinobacteria; o__Actinomycetales; f__unidentified_Actinomycetales; g__unidentified_Actinomycetales; s__unidentified_Actinomycetales
ASV_12558	0.0	0.0	0.0	33.0	15.0	13.0	d__Bacteria; p__Proteobacteria; c__Alphaproteobacteria; o__Sphingomonadales; f__Sphingomonadaceae; g__Kaistobacter; s__unidentified_Kaistobacter
ASV_18683	0.0	0.0	0.0	0.0	49.0	19.0	d__Bacteria; p__Actinobacteria; c__Actinobacteria; o__Actinomycetales; f__Mycobacteriaceae; g__Mycobacterium; s__unidentified_Mycobacterium
ASV_4549	12.0	0.0	30.0	6.0	0.0	0.0	d__Bacteria; p__Bacteroidetes; c__Bacteroidia; o__Bacteroidales; f__S24-7; g__unidentified_S24-7; s__unidentified_S24-7
ASV_5905	7.0	0.0	0.0	17.0	0.0	0.0	d__Bacteria; p__Firmicutes; c__Clostridia; o__Clostridiales; f__Ruminococcaceae; g__unidentified_Ruminococcaceae; s__unidentified_Ruminococcaceae
ASV_17073	0.0	10.0	0.0	11.0	0.0	0.0	d__Bacteria; p__Firmicutes; c__Clostridia; o__Clostridiales; f__Peptococcaceae; g__rc4-4; s__unidentified_rc4-4
ASV_10814	0.0	0.0	0.0	11.0	21.0	0.0	d__Bacteria; p__Acidobacteria; c__Acidobacteriia; o__Acidobacteriales; f__Acidobacteriaceae; g__unidentified_Acidobacteriaceae; s__unidentified_Acidobacteriaceae
ASV_16843	0.0	0.0	0.0	0.0	14.0	42.0	d__Bacteria; p__Proteobacteria; c__Betaproteobacteria; o__Burkholderiales; f__Comamonadaceae; g__Aquabacterium; s__unidentified_Aquabacterium
ASV_13119	0.0	0.0	0.0	14.0	50.0	0.0	d__Bacteria; p__Actinobacteria; c__Actinobacteria; o__Micrococcales; f__unidentified_Micrococcales; g__unidentified_Micrococcales; s__unidentified_Micrococcales
ASV_15741	0.0	0.0	0.0	15.0	22.0	28.0	d__Bacteria; p__Gemmatimonadetes; c__Gemmatimonadetes; o__Ellin5290; f__unidentified_Ellin5290; g__unidentified_Ellin5290; s__unidentified_Ellin5290
ASV_4956	0.0	0.0	0.0	0.0	15.0	39.0	d__Bacteria; p__Firmicutes; c__Clostridia; o__Clostridiales; f__Lachnospiraceae; g__unidentified_Lachnospiraceae; s__unidentified_Lachnospiraceae
ASV_13877	15.0	0.0	27.0	10.0	0.0	0.0	d__Bacteria; p__Firmicutes; c__Clostridia; o__Clostridiales; f__unidentified_Clostridiales; g__unidentified_Clostridiales; s__unidentified_Clostridiales
ASV_16710	8.0	14.0	0.0	17.0	0.0	0.0	d__Bacteria; p__Firmicutes; c__Clostridia; o__Clostridiales; f__Clostridiaceae; g__Clostridium; s__unidentified_Clostridium
ASV_1394	0.0	16.0	0.0	0.0	0.0	4.0	d__Bacteria; p__Spirochaetes; c__Spirochaetes; o__Spirochaetales; f__Spirochaetaceae; g__Treponema; s__unidentified_Treponema
ASV_20116	0.0	58.0	0.0	4.0	0.0	0.0	d__Bacteria; p__Firmicutes; c__Clostridia; o__Clostridiales; f__Lachnospiraceae; g__Coprococcus; s__unidentified_Coprococcus
ASV_12527	0.0	0.0	10.0	7.0	0.0	0.0	d__Bacteria; p__Firmicutes; c__Clostridia; o__Clostridiales; f__Ruminococcaceae; g__unidentified_Ruminococcaceae; s__unidentified_Ruminococcaceae
ASV_22209	0.0	0.0	0.0	0.0	27.0	31.0	d__Bacteria; p__Proteobacteria; c__Alphaproteobacteria; o__Rhodospirillales; f__Rhodospirillaceae; g__Reyranella; s__Reyranella_massiliensis
ASV_24249	0.0	0.0	0.0	0.0	15.0	35.0	d__Bacteria; p__Gemmatimonadetes; c__Gemmatimonadetes; o__Ellin5290; f__unidentified_Ellin5290; g__unidentified_Ellin5290; s__unidentified_Ellin5290
ASV_4793	0.0	0.0	0.0	44.0	0.0	0.0	d__Bacteria; p__Firmicutes; c__Clostridia; o__Clostridiales; f__unidentified_Clostridiales; g__unidentified_Clostridiales; s__unidentified_Clostridiales
ASV_2374	0.0	0.0	0.0	50.0	0.0	0.0	d__Bacteria; p__Actinobacteria; c__Actinobacteria; o__Actinomycetales; f__Micromonosporaceae; g__unclassified_Micromonosporaceae; s__unclassified_Micromonosporaceae
ASV_15530	0.0	0.0	0.0	0.0	0.0	73.0	d__Bacteria; p__Firmicutes; c__Clostridia; o__Clostridiales; f__Lachnospiraceae; g__unidentified_Lachnospiraceae; s__unidentified_Lachnospiraceae
ASV_18800	0.0	0.0	0.0	9.0	33.0	14.0	d__Bacteria; p__Proteobacteria; c__Alphaproteobacteria; o__Rhizobiales; f__Brucellaceae; g__Ochrobactrum; s__unidentified_Ochrobactrum
ASV_4161	0.0	7.0	0.0	0.0	0.0	0.0	d__Bacteria; p__Firmicutes; c__Clostridia; o__Clostridiales; f__Lachnospiraceae; g__unidentified_Lachnospiraceae; s__unidentified_Lachnospiraceae
ASV_10184	0.0	7.0	18.0	14.0	5.0	0.0	d__Bacteria; p__Firmicutes; c__Clostridia; o__Clostridiales; f__Ruminococcaceae; g__Ruminococcus; s__unidentified_Ruminococcus
ASV_23303	0.0	0.0	12.0	13.0	10.0	18.0	d__Bacteria; p__Firmicutes; c__Clostridia; o__Clostridiales; f__Veillonellaceae; g__unidentified_Veillonellaceae; s__unidentified_Veillonellaceae
ASV_7077	0.0	0.0	0.0	23.0	0.0	0.0	d__Bacteria; p__Firmicutes; c__Clostridia; o__Clostridiales; f__Lachnospiraceae; g__unidentified_Lachnospiraceae; s__unidentified_Lachnospiraceae
ASV_20324	0.0	0.0	0.0	0.0	54.0	0.0	d__Bacteria; p__Actinobacteria; c__Actinobacteria; o__Actinomycetales; f__unclassified_Actinomycetales; g__unclassified_Actinomycetales; s__unclassified_Actinomycetales
ASV_5067	0.0	0.0	0.0	8.0	14.0	27.0	d__Bacteria; p__Proteobacteria; c__Alphaproteobacteria; o__Sphingomonadales; f__Sphingomonadaceae; g__Kaistobacter; s__unidentified_Kaistobacter
ASV_11361	0.0	0.0	0.0	25.0	0.0	22.0	d__Bacteria; p__Firmicutes; c__Clostridia; o__Clostridiales; f__Ruminococcaceae; g__unidentified_Ruminococcaceae; s__unidentified_Ruminococcaceae
ASV_21138	0.0	0.0	0.0	27.0	0.0	25.0	d__Bacteria; p__Proteobacteria; c__Gammaproteobacteria; o__Xanthomonadales; f__Xanthomonadaceae; g__Rhodanobacter; s__unidentified_Rhodanobacter
ASV_14206	16.0	26.0	18.0	0.0	0.0	6.0	d__Bacteria; p__Tenericutes; c__Mollicutes; o__RF39; f__unidentified_RF39; g__unidentified_RF39; s__unidentified_RF39
ASV_13151	0.0	2.0	14.0	0.0	34.0	0.0	d__Bacteria; p__Firmicutes; c__Clostridia; o__Clostridiales; f__Ruminococcaceae; g__unidentified_Ruminococcaceae; s__unidentified_Ruminococcaceae
ASV_23069	0.0	0.0	0.0	17.0	10.0	27.0	d__Bacteria; p__Gemmatimonadetes; c__Gemmatimonadetes; o__N1423WL; f__unidentified_N1423WL; g__unidentified_N1423WL; s__unidentified_N1423WL
ASV_5765	4.0	12.0	2.0	12.0	13.0	0.0	d__Bacteria; p__Bacteroidetes; c__Bacteroidia; o__Bacteroidales; f__S24-7; g__unidentified_S24-7; s__unidentified_S24-7
ASV_17197	16.0	0.0	5.0	0.0	0.0	0.0	d__Bacteria; p__Firmicutes; c__Clostridia; o__Clostridiales; f__Ruminococcaceae; g__unidentified_Ruminococcaceae; s__unidentified_Ruminococcaceae
ASV_1434	8.0	0.0	0.0	12.0	0.0	9.0	d__Bacteria; p__Actinobacteria; c__Coriobacteriia; o__Coriobacteriales; f__Coriobacteriaceae; g__Adlercreutzia; s__unidentified_Adlercreutzia
ASV_5410	0.0	0.0	0.0	23.0	0.0	0.0	d__Bacteria; p__Firmicutes; c__Clostridia; o__Clostridiales; f__Ruminococcaceae; g__unidentified_Ruminococcaceae; s__unidentified_Ruminococcaceae
ASV_11876	0.0	0.0	0.0	20.0	15.0	0.0	d__Bacteria; p__Actinobacteria; c__Actinobacteria; o__Actinomycetales; f__Micromonosporaceae; g__Pilimelia; s__unidentified_Pilimelia
ASV_17992	0.0	0.0	0.0	27.0	0.0	0.0	d__Bacteria; p__Actinobacteria; c__Thermoleophilia; o__Solirubrobacterales; f__unidentified_Solirubrobacterales; g__unidentified_Solirubrobacterales; s__unidentified_Solirubrobacterales
ASV_3627	0.0	0.0	0.0	42.0	0.0	0.0	d__Bacteria; p__Bacteroidetes; c__Bacteroidia; o__Bacteroidales; f__Porphyromonadaceae; g__Paludibacter; s__unidentified_Paludibacter
ASV_4529	0.0	0.0	0.0	17.0	26.0	20.0	d__Bacteria; p__Acidobacteria; c__Solibacteres; o__Solibacterales; f__Solibacteraceae; g__unidentified_Solibacteraceae; s__unidentified_Solibacteraceae
ASV_322	0.0	0.0	0.0	0.0	0.0	44.0	d__Bacteria; p__Firmicutes; c__Clostridia; o__Clostridiales; f__Lachnospiraceae; g__unidentified_Lachnospiraceae; s__unidentified_Lachnospiraceae
ASV_11829	12.0	0.0	0.0	16.0	0.0	27.0	d__Bacteria; p__Bacteroidetes; c__Bacteroidia; o__Bacteroidales; f__Bacteroidaceae; g__Bacteroides; s__unidentified_Bacteroides
ASV_23827	12.0	0.0	0.0	0.0	0.0	1.0	d__Bacteria; p__Firmicutes; c__Clostridia; o__Clostridiales; f__Ruminococcaceae; g__unidentified_Ruminococcaceae; s__unidentified_Ruminococcaceae
ASV_12297	26.0	0.0	5.0	0.0	0.0	16.0	d__Bacteria; p__Actinobacteria; c__Coriobacteriia; o__Coriobacteriales; f__Coriobacteriaceae; g__Adlercreutzia; s__unidentified_Adlercreutzia
ASV_18243	27.0	14.0	16.0	0.0	0.0	0.0	d__Bacteria; p__Tenericutes; c__Mollicutes; o__RF39; f__unidentified_RF39; g__unidentified_RF39; s__unidentified_RF39
ASV_15426	0.0	4.0	0.0	7.0	0.0	2.0	d__Bacteria; p__Firmicutes; c__Clostridia; o__Clostridiales; f__Clostridiaceae; g__unidentified_Clostridiaceae; s__unidentified_Clostridiaceae
ASV_10798	0.0	20.0	15.0	10.0	0.0	0.0	d__Bacteria; p__Firmicutes; c__Clostridia; o__Clostridiales; f__Ruminococcaceae; g__unidentified_Ruminococcaceae; s__unidentified_Ruminococcaceae
ASV_5807	0.0	0.0	60.0	16.0	0.0	0.0	d__Bacteria; p__Firmicutes; c__Clostridia; o__Clostridiales; f__Ruminococcaceae; g__Ruminococcus; s__unidentified_Ruminococcus
ASV_13022	0.0	0.0	0.0	0.0	12.0	35.0	d__Bacteria; p__Gemmatimonadetes; c__Gemmatimonadetes; o__Ellin5290; f__unidentified_Ellin5290; g__unidentified_Ellin5290; s__unidentified_Ellin5290
ASV_24917	0.0	0.0	0.0	14.0	0.0	34.0	d__Bacteria; p__Acidobacteria; c__Acidobacteriia; o__Acidobacteriales; f__Acidobacteriaceae; g__Terriglobus; s__unidentified_Terriglobus
ASV_26307	0.0	0.0	0.0	0.0	20.0	0.0	d__Bacteria; p__Firmicutes; c__Clostridia; o__Clostridiales; f__unidentified_Clostridiales; g__unidentified_Clostridiales; s__unidentified_Clostridiales
ASV_19653	0.0	0.0	0.0	0.0	0.0	64.0	d__Bacteria; p__Firmicutes; c__Clostridia; o__Clostridiales; f__Ruminococcaceae; g__unidentified_Ruminococcaceae; s__unidentified_Ruminococcaceae
ASV_15165	0.0	0.0	0.0	0.0	0.0	68.0	d__Bacteria; p__Acidobacteria; c__Solibacteres; o__Solibacterales; f__Solibacteraceae; g__Candidatus_Solibacter; s__unidentified_Candidatus_Solibacter
ASV_24581	29.0	1.0	0.0	0.0	2.0	0.0	d__Bacteria; p__Firmicutes; c__Clostridia; o__Clostridiales; f__Lachnospiraceae; g__unidentified_Lachnospiraceae; s__unidentified_Lachnospiraceae
ASV_901	22.0	0.0	5.0	0.0	32.0	3.0	d__Bacteria; p__Firmicutes; c__Clostridia; o__Clostridiales; f__Ruminococcaceae; g__unidentified_Ruminococcaceae; s__unidentified_Ruminococcaceae
ASV_12241	0.0	0.0	92.0	0.0	0.0	0.0	d__Bacteria; p__Firmicutes; c__Clostridia; o__Clostridiales; f__unidentified_Clostridiales; g__unidentified_Clostridiales; s__unidentified_Clostridiales
ASV_16934	0.0	0.0	0.0	8.0	0.0	36.0	d__Bacteria; p__Proteobacteria; c__Gammaproteobacteria; o__Xanthomonadales; f__Xanthomonadaceae; g__Dyella; s__unclassified_Dyella
ASV_11523	0.0	0.0	0.0	29.0	11.0	7.0	d__Bacteria; p__Proteobacteria; c__Gammaproteobacteria; o__Pseudomonadales; f__Moraxellaceae; g__Acinetobacter; s__unclassified_Acinetobacter
ASV_161	0.0	0.0	0.0	0.0	0.0	24.0	d__Bacteria; p__Gemmatimonadetes; c__Gemmatimonadetes; o__Ellin5290; f__unidentified_Ellin5290; g__unidentified_Ellin5290; s__unidentified_Ellin5290
ASV_4360	0.0	0.0	0.0	18.0	11.0	8.0	d__Bacteria; p__Bacteroidetes; c__Bacteroidia; o__Bacteroidales; f__S24-7; g__unidentified_S24-7; s__unidentified_S24-7
ASV_23528	0.0	0.0	0.0	0.0	64.0	0.0	d__Bacteria; p__Actinobacteria; c__Actinobacteria; o__Actinomycetales; f__Microbacteriaceae; g__Salinibacterium; s__unclassified_Salinibacterium
ASV_22753	0.0	0.0	0.0	0.0	0.0	24.0	d__Bacteria; p__Firmicutes; c__Clostridia; o__Clostridiales; f__Ruminococcaceae; g__Oscillospira; s__unidentified_Oscillospira
ASV_19176	4.0	10.0	45.0	0.0	0.0	0.0	d__Bacteria; p__Bacteroidetes; c__Bacteroidia; o__Bacteroidales; f__S24-7; g__unidentified_S24-7; s__unidentified_S24-7
ASV_5324	9.0	21.0	23.0	0.0	0.0	0.0	d__Bacteria; p__Firmicutes; c__Clostridia; o__Clostridiales; f__unidentified_Clostridiales; g__unidentified_Clostridiales; s__unidentified_Clostridiales
ASV_4005	13.0	0.0	0.0	0.0	0.0	0.0	d__Bacteria; p__Firmicutes; c__Clostridia; o__Clostridiales; f__Lachnospiraceae; g__unidentified_Lachnospiraceae; s__unidentified_Lachnospiraceae
ASV_18961	25.0	0.0	2.0	11.0	0.0	0.0	d__Bacteria; p__Proteobacteria; c__Alphaproteobacteria; o__Rhizobiales; f__unclassified_Rhizobiales; g__unclassified_Rhizobiales; s__unclassified_Rhizobiales
ASV_6841	0.0	0.0	23.0	0.0	0.0	9.0	d__Bacteria; p__Bacteroidetes; c__Bacteroidia; o__Bacteroidales; f__unidentified_Bacteroidales; g__unidentified_Bacteroidales; s__unidentified_Bacteroidales
ASV_475	0.0	0.0	0.0	0.0	18.0	22.0	d__Bacteria; p__Bacteroidetes; c__Sphingobacteriia; o__Sphingobacteriales; f__Sphingobacteriaceae; g__unidentified_Sphingobacteriaceae; s__unidentified_Sphingobacteriaceae
ASV_21217	0.0	0.0	0.0	14.0	0.0	0.0	d__Bacteria; p__Actinobacteria; c__Actinobacteria; o__Actinomycetales; f__Geodermatophilaceae; g__Geodermatophilus; s__unidentified_Geodermatophilus
ASV_7715	0.0	0.0	0.0	44.0	0.0	0.0	d__Bacteria; p__Firmicutes; c__Clostridia; o__Clostridiales; f__Lachnospiraceae; g__Blautia; s__unidentified_Blautia
ASV_13039	0.0	0.0	0.0	0.0	69.0	0.0	d__Bacteria; p__Actinobacteria; c__Actinobacteria; o__Actinomycetales; f__Micromonosporaceae; g__unclassified_Micromonosporaceae; s__unclassified_Micromonosporaceae
ASV_7140	0.0	0.0	0.0	0.0	0.0	46.0	d__Bacteria; p__Firmicutes; c__Clostridia; o__Clostridiales; f__Lachnospiraceae; g__Roseburia; s__unclassified_Roseburia
ASV_16210	15.0	5.0	15.0	7.0	0.0	0.0	d__Bacteria; p__Bacteroidetes; c__Bacteroidia; o__Bacteroidales; f__S24-7; g__unidentified_S24-7; s__unidentified_S24-7
ASV_14095	0.0	0.0	1.0	3.0	22.0	13.0	d__Bacteria; p__Bacteroidetes; c__Bacteroidia; o__Bacteroidales; f__RF16; g__unidentified_RF16; s__unidentified_RF16
ASV_26146	0.0	0.0	0.0	13.0	0.0	0.0	d__Bacteria; p__Gemmatimonadetes; c__Gemmatimonadetes; o__N1423WL; f__unidentified_N1423WL; g__unidentified_N1423WL; s__unidentified_N1423WL
ASV_13605	0.0	0.0	0.0	0.0	66.0	0.0	d__Bacteria; p__Firmicutes; c__Clostridia; o__Clostridiales; f__unidentified_Clostridiales; g__unidentified_Clostridiales; s__unidentified_Clostridiales
ASV_21650	44.0	29.0	0.0	0.0	0.0	0.0	d__Bacteria; p__Firmicutes; c__Clostridia; o__Clostridiales; f__Ruminococcaceae; g__unidentified_Ruminococcaceae; s__unidentified_Ruminococcaceae
ASV_25524	45.0	14.0	4.0	0.0	0.0	0.0	d__Bacteria; p__Firmicutes; c__Clostridia; o__Clostridiales; f__unidentified_Clostridiales; g__unidentified_Clostridiales; s__unidentified_Clostridiales
ASV_18247	70.0	0.0	0.0	0.0	0.0	0.0	d__Bacteria; p__Tenericutes; c__Mollicutes; o__RF39; f__unidentified_RF39; g__unidentified_RF39; s__unidentified_RF39
ASV_20965	0.0	16.0	0.0	0.0	0.0	0.0	d__Bacteria; p__Firmicutes; c__Bacilli; o__Lactobacillales; f__Streptococcaceae; g__Streptococcus; s__unidentified_Streptococcus
ASV_13728	0.0	0.0	10.0	12.0	0.0	0.0	d__Bacteria; p__Firmicutes; c__Clostridia; o__Clostridiales; f__Ruminococcaceae; g__unidentified_Ruminococcaceae; s__unidentified_Ruminococcaceae
ASV_16916	0.0	0.0	0.0	0.0	0.0	43.0	d__Bacteria; p__Proteobacteria; c__Betaproteobacteria; o__Burkholderiales; f__Burkholderiaceae; g__Burkholderia; s__unidentified_Burkholderia
ASV_5462	0.0	0.0	0.0	14.0	0.0	0.0	d__Bacteria; p__Proteobacteria; c__Betaproteobacteria; o__SC-I-84; f__unidentified_SC-I-84; g__unidentified_SC-I-84; s__unidentified_SC-I-84
ASV_13776	12.0	20.0	0.0	0.0	9.0	0.0	d__Bacteria; p__Proteobacteria; c__Alphaproteobacteria; o__Sphingomonadales; f__Sphingomonadaceae; g__Sphingomonas; s__unclassified_Sphingomonas
ASV_23317	24.0	0.0	4.0	0.0	13.0	0.0	d__Bacteria; p__Firmicutes; c__Clostridia; o__Clostridiales; f__Ruminococcaceae; g__unidentified_Ruminococcaceae; s__unidentified_Ruminococcaceae
ASV_3950	0.0	0.0	10.0	0.0	0.0	4.0	d__Bacteria; p__Firmicutes; c__Clostridia; o__Clostridiales; f__unidentified_Clostridiales; g__unidentified_Clostridiales; s__unidentified_Clostridiales
ASV_24853	0.0	0.0	0.0	4.0	0.0	30.0	d__Bacteria; p__Bacteroidetes; c__Bacteroidia; o__Bacteroidales; f__Rikenellaceae; g__unclassified_Rikenellaceae; s__unclassified_Rikenellaceae
ASV_17913	0.0	0.0	0.0	0.0	38.0	0.0	d__Bacteria; p__Firmicutes; c__Bacilli; o__Bacillales; f__Bacillaceae; g__Bacillus; s__unclassified_Bacillus
ASV_10716	10.0	4.0	4.0	12.0	0.0	0.0	d__Bacteria; p__Firmicutes; c__Clostridia; o__Clostridiales; f__unclassified_Clostridiales; g__unclassified_Clostridiales; s__unclassified_Clostridiales
ASV_16601	14.0	0.0	8.0	0.0	0.0	0.0	d__Bacteria; p__Proteobacteria; c__Alphaproteobacteria; o__Rhodospirillales; f__Rhodospirillaceae; g__Reyranella; s__Reyranella_massiliensis
ASV_26190	7.0	0.0	13.0	0.0	0.0	0.0	d__Bacteria; p__Firmicutes; c__Clostridia; o__Clostridiales; f__Ruminococcaceae; g__unidentified_Ruminococcaceae; s__unidentified_Ruminococcaceae
ASV_12163	18.0	0.0	4.0	0.0	0.0	10.0	d__Bacteria; p__Firmicutes; c__Clostridia; o__Clostridiales; f__unidentified_Clostridiales; g__unidentified_Clostridiales; s__unidentified_Clostridiales
ASV_23550	0.0	14.0	17.0	0.0	0.0	0.0	d__Bacteria; p__Firmicutes; c__Clostridia; o__Clostridiales; f__Ruminococcaceae; g__Oscillospira; s__unidentified_Oscillospira
ASV_10670	0.0	0.0	0.0	0.0	0.0	17.0	d__Bacteria; p__Bacteroidetes; c__Bacteroidia; o__Bacteroidales; f__[Paraprevotellaceae]; g__YRC22; s__unidentified_YRC22
ASV_14599	0.0	0.0	0.0	4.0	0.0	0.0	d__Bacteria; p__Firmicutes; c__Clostridia; o__Clostridiales; f__Lachnospiraceae; g__unidentified_Lachnospiraceae; s__unidentified_Lachnospiraceae
ASV_17918	0.0	0.0	0.0	0.0	0.0	6.0	d__Bacteria; p__Firmicutes; c__Clostridia; o__Clostridiales; f__Ruminococcaceae; g__unidentified_Ruminococcaceae; s__unidentified_Ruminococcaceae
ASV_21525	0.0	0.0	0.0	7.0	24.0	32.0	d__Bacteria; p__Firmicutes; c__Bacilli; o__Bacillales; f__unclassified_Bacillales; g__unclassified_Bacillales; s__unclassified_Bacillales
ASV_23829	0.0	0.0	0.0	9.0	24.0	30.0	d__Bacteria; p__Actinobacteria; c__Thermoleophilia; o__Gaiellales; f__Gaiellaceae; g__unidentified_Gaiellaceae; s__unidentified_Gaiellaceae
ASV_22648	0.0	0.0	0.0	13.0	45.0	0.0	d__Bacteria; p__TM7; c__TM7-1; o__unidentified_TM7-1; f__unidentified_TM7-1; g__unidentified_TM7-1; s__unidentified_TM7-1
ASV_20647	0.0	0.0	0.0	0.0	0.0	67.0	d__Bacteria; p__Chloroflexi; c__Ellin6529; o__unidentified_Ellin6529; f__unidentified_Ellin6529; g__unidentified_Ellin6529; s__unidentified_Ellin6529
ASV_23044	13.0	0.0	13.0	10.0	0.0	12.0	d__Bacteria; p__Firmicutes; c__Bacilli; o__Lactobacillales; f__Lactobacillaceae; g__Lactobacillus; s__unclassified_Lactobacillus
ASV_23442	12.0	11.0	15.0	0.0	0.0	0.0	d__Bacteria; p__Bacteroidetes; c__Bacteroidia; o__Bacteroidales; f__S24-7; g__unidentified_S24-7; s__unidentified_S24-7
ASV_11775	0.0	25.0	43.0	0.0	0.0	0.0	d__Bacteria; p__Firmicutes; c__Clostridia; o__Clostridiales; f__Lachnospiraceae; g__unidentified_Lachnospiraceae; s__unidentified_Lachnospiraceae
ASV_11514	0.0	0.0	0.0	0.0	0.0	35.0	d__Bacteria; p__Chloroflexi; c__Thermomicrobia; o__unidentified_Thermomicrobia; f__unidentified_Thermomicrobia; g__unidentified_Thermomicrobia; s__unidentified_Thermomicrobia
ASV_24741	0.0	0.0	0.0	14.0	0.0	17.0	d__Bacteria; p__Proteobacteria; c__Alphaproteobacteria; o__Rhizobiales; f__Rhizobiaceae; g__unclassified_Rhizobiaceae; s__unclassified_Rhizobiaceae
ASV_11581	0.0	0.0	0.0	34.0	0.0	0.0	d__Bacteria; p__Firmicutes; c__Clostridia; o__Clostridiales; f__unclassified_Clostridiales; g__unclassified_Clostridiales; s__unclassified_Clostridiales
ASV_25541	19.0	13.0	13.0	0.0	0.0	0.0	d__Bacteria; p__Cyanobacteria; c__4C0d-2; o__YS2; f__unidentified_YS2; g__unidentified_YS2; s__unidentified_YS2
ASV_1732	11.0	13.0	14.0	0.0	0.0	0.0	d__Bacteria; p__Tenericutes; c__Mollicutes; o__RF39; f__unidentified_RF39; g__unidentified_RF39; s__unidentified_RF39
ASV_6633	0.0	3.0	0.0	10.0	1.0	12.0	d__Bacteria; p__Firmicutes; c__Bacilli; o__Lactobacillales; f__Lactobacillaceae; g__Lactobacillus; s__unidentified_Lactobacillus
ASV_6712	0.0	0.0	25.0	0.0	33.0	0.0	d__Bacteria; p__Bacteroidetes; c__Bacteroidia; o__Bacteroidales; f__unidentified_Bacteroidales; g__unidentified_Bacteroidales; s__unidentified_Bacteroidales
ASV_21002	0.0	0.0	0.0	0.0	0.0	14.0	d__Bacteria; p__Firmicutes; c__Clostridia; o__Clostridiales; f__unclassified_Clostridiales; g__unclassified_Clostridiales; s__unclassified_Clostridiales
ASV_9993	0.0	0.0	0.0	0.0	0.0	23.0	d__Bacteria; p__TM7; c__TM7-1; o__unidentified_TM7-1; f__unidentified_TM7-1; g__unidentified_TM7-1; s__unidentified_TM7-1
ASV_15324	0.0	0.0	0.0	24.0	38.0	0.0	d__Bacteria; p__Firmicutes; c__Clostridia; o__Clostridiales; f__Clostridiaceae; g__Clostridium; s__Clostridium_butyricum
ASV_17434	0.0	0.0	0.0	0.0	64.0	0.0	d__Bacteria; p__Chloroflexi; c__Thermomicrobia; o__JG30-KF-CM45; f__unidentified_JG30-KF-CM45; g__unidentified_JG30-KF-CM45; s__unidentified_JG30-KF-CM45
ASV_22849	0.0	0.0	0.0	0.0	61.0	0.0	d__Bacteria; p__Actinobacteria; c__Actinobacteria; o__Actinomycetales; f__Pseudonocardiaceae; g__Pseudonocardia; s__unidentified_Pseudonocardia
ASV_12764	4.0	0.0	6.0	7.0	0.0	0.0	d__Bacteria; p__Firmicutes; c__Clostridia; o__Clostridiales; f__Ruminococcaceae; g__Butyricicoccus; s__Butyricicoccus_pullicaecorum
ASV_5180	13.0	0.0	0.0	2.0	14.0	10.0	d__Bacteria; p__Bacteroidetes; c__Bacteroidia; o__Bacteroidales; f__Prevotellaceae; g__Prevotella; s__unidentified_Prevotella
ASV_20773	50.0	0.0	20.0	0.0	0.0	0.0	d__Bacteria; p__Firmicutes; c__Clostridia; o__Clostridiales; f__Ruminococcaceae; g__Oscillospira; s__unidentified_Oscillospira
ASV_14262	0.0	8.0	0.0	0.0	0.0	0.0	d__Bacteria; p__Firmicutes; c__Clostridia; o__Clostridiales; f__Lachnospiraceae; g__unidentified_Lachnospiraceae; s__unidentified_Lachnospiraceae
ASV_4442	0.0	8.0	0.0	0.0	0.0	0.0	d__Bacteria; p__Firmicutes; c__Clostridia; o__Clostridiales; f__Ruminococcaceae; g__unidentified_Ruminococcaceae; s__unidentified_Ruminococcaceae
ASV_24668	0.0	0.0	7.0	0.0	0.0	18.0	d__Bacteria; p__Firmicutes; c__Clostridia; o__Clostridiales; f__unidentified_Clostridiales; g__unidentified_Clostridiales; s__unidentified_Clostridiales
ASV_6796	0.0	0.0	6.0	6.0	0.0	0.0	d__Bacteria; p__Firmicutes; c__Clostridia; o__Clostridiales; f__Ruminococcaceae; g__unidentified_Ruminococcaceae; s__unidentified_Ruminococcaceae
ASV_939	0.0	0.0	0.0	7.0	45.0	0.0	d__Bacteria; p__Firmicutes; c__Bacilli; o__Lactobacillales; f__Lactobacillaceae; g__Pediococcus; s__unclassified_Pediococcus
ASV_5479	0.0	0.0	0.0	7.0	13.0	13.0	d__Bacteria; p__Firmicutes; c__Clostridia; o__Clostridiales; f__Lachnospiraceae; g__Coprococcus; s__unidentified_Coprococcus
ASV_10166	0.0	0.0	0.0	0.0	8.0	31.0	d__Bacteria; p__Proteobacteria; c__Alphaproteobacteria; o__Rhizobiales; f__Hyphomicrobiaceae; g__Rhodoplanes; s__unidentified_Rhodoplanes
ASV_21991	0.0	0.0	0.0	13.0	0.0	0.0	d__Bacteria; p__Firmicutes; c__Bacilli; o__Lactobacillales; f__Lactobacillaceae; g__Lactobacillus; s__unidentified_Lactobacillus
ASV_23823	0.0	0.0	0.0	21.0	0.0	31.0	d__Bacteria; p__TM7; c__TM7-1; o__unidentified_TM7-1; f__unidentified_TM7-1; g__unidentified_TM7-1; s__unidentified_TM7-1
ASV_11993	0.0	0.0	0.0	0.0	24.0	30.0	d__Bacteria; p__Cyanobacteria; c__Chloroplast; o__Stramenopiles; f__unidentified_Stramenopiles; g__unidentified_Stramenopiles; s__unidentified_Stramenopiles
ASV_2704	2.0	3.0	44.0	1.0	0.0	0.0	d__Bacteria; p__Bacteroidetes; c__Bacteroidia; o__Bacteroidales; f__S24-7; g__unidentified_S24-7; s__unidentified_S24-7
ASV_6646	1.0	23.0	0.0	18.0	0.0	5.0	d__Bacteria; p__Firmicutes; c__Clostridia; o__Clostridiales; f__[Mogibacteriaceae]; g__unidentified_[Mogibacteriaceae]; s__unidentified_[Mogibacteriaceae]
ASV_20335	25.0	32.0	0.0	0.0	0.0	0.0	d__Bacteria; p__Firmicutes; c__Clostridia; o__Clostridiales; f__Peptococcaceae; g__rc4-4; s__unidentified_rc4-4
ASV_18293	0.0	11.0	0.0	5.0	0.0	14.0	d__Bacteria; p__Firmicutes; c__Bacilli; o__Lactobacillales; f__Lactobacillaceae; g__Lactobacillus; s__unidentified_Lactobacillus
ASV_4178	0.0	52.0	25.0	0.0	0.0	0.0	d__Bacteria; p__Firmicutes; c__Clostridia; o__Clostridiales; f__unidentified_Clostridiales; g__unidentified_Clostridiales; s__unidentified_Clostridiales
ASV_19108	0.0	0.0	0.0	16.0	0.0	1.0	d__Bacteria; p__Actinobacteria; c__Actinobacteria; o__Actinomycetales; f__Streptosporangiaceae; g__unclassified_Streptosporangiaceae; s__unclassified_Streptosporangiaceae
ASV_5082	0.0	0.0	0.0	22.0	0.0	35.0	d__Bacteria; p__Proteobacteria; c__Alphaproteobacteria; o__Rhizobiales; f__Hyphomicrobiaceae; g__unidentified_Hyphomicrobiaceae; s__unidentified_Hyphomicrobiaceae
ASV_1054	0.0	0.0	0.0	0.0	22.0	44.0	d__Bacteria; p__Proteobacteria; c__Alphaproteobacteria; o__Rhodospirillales; f__Acetobacteraceae; g__unidentified_Acetobacteraceae; s__unidentified_Acetobacteraceae
ASV_24334	0.0	0.0	0.0	0.0	0.0	58.0	d__Bacteria; p__Firmicutes; c__Clostridia; o__Clostridiales; f__[Acidaminobacteraceae]; g__Acidaminobacter; s__unidentified_Acidaminobacter
ASV_24797	0.0	0.0	0.0	0.0	0.0	64.0	d__Bacteria; p__Actinobacteria; c__Thermoleophilia; o__Gaiellales; f__Gaiellaceae; g__unidentified_Gaiellaceae; s__unidentified_Gaiellaceae
ASV_10109	9.0	0.0	0.0	7.0	0.0	4.0	d__Bacteria; p__Firmicutes; c__Clostridia; o__Clostridiales; f__unclassified_Clostridiales; g__unclassified_Clostridiales; s__unclassified_Clostridiales
ASV_19214	0.0	7.0	13.0	5.0	0.0	0.0	d__Bacteria; p__Firmicutes; c__Clostridia; o__Clostridiales; f__Ruminococcaceae; g__Oscillospira; s__unidentified_Oscillospira
ASV_23940	0.0	0.0	0.0	3.0	0.0	21.0	d__Bacteria; p__Firmicutes; c__Clostridia; o__Clostridiales; f__Christensenellaceae; g__unidentified_Christensenellaceae; s__unidentified_Christensenellaceae
ASV_2672	0.0	0.0	0.0	8.0	54.0	0.0	d__Bacteria; p__Bacteroidetes; c__[Saprospirae]; o__[Saprospirales]; f__Chitinophagaceae; g__unidentified_Chitinophagaceae; s__unidentified_Chitinophagaceae
ASV_3150	0.0	0.0	0.0	0.0	37.0	21.0	d__Bacteria; p__Verrucomicrobia; c__Verrucomicrobiae; o__Verrucomicrobiales; f__Verrucomicrobiaceae; g__unidentified_Verrucomicrobiaceae; s__unidentified_Verrucomicrobiaceae
ASV_12053	0.0	0.0	0.0	0.0	25.0	35.0	d__Bacteria; p__Proteobacteria; c__Betaproteobacteria; o__Ellin6067; f__unidentified_Ellin6067; g__unidentified_Ellin6067; s__unidentified_Ellin6067
ASV_14415	5.0	8.0	0.0	0.0	11.0	6.0	d__Bacteria; p__Firmicutes; c__Clostridia; o__Clostridiales; f__Lachnospiraceae; g__Dorea; s__unidentified_Dorea
ASV_5529	17.0	4.0	9.0	8.0	0.0	10.0	d__Bacteria; p__Actinobacteria; c__Coriobacteriia; o__Coriobacteriales; f__Coriobacteriaceae; g__Adlercreutzia; s__unidentified_Adlercreutzia
ASV_2402	23.0	22.0	0.0	0.0	0.0	0.0	d__Bacteria; p__Actinobacteria; c__Coriobacteriia; o__Coriobacteriales; f__Coriobacteriaceae; g__Adlercreutzia; s__unidentified_Adlercreutzia
ASV_11839	0.0	0.0	0.0	0.0	24.0	27.0	d__Bacteria; p__Proteobacteria; c__Gammaproteobacteria; o__Xanthomonadales; f__Xanthomonadaceae; g__Rhodanobacter; s__unclassified_Rhodanobacter
ASV_7196	0.0	0.0	0.0	0.0	0.0	2.0	d__Bacteria; p__Firmicutes; c__Clostridia; o__Clostridiales; f__Ruminococcaceae; g__unidentified_Ruminococcaceae; s__unidentified_Ruminococcaceae
ASV_1583	0.0	0.0	0.0	0.0	25.0	14.0	d__Bacteria; p__Actinobacteria; c__Thermoleophilia; o__Gaiellales; f__Gaiellaceae; g__unidentified_Gaiellaceae; s__unidentified_Gaiellaceae
ASV_18310	0.0	0.0	0.0	17.0	32.0	0.0	d__Bacteria; p__Proteobacteria; c__Betaproteobacteria; o__Burkholderiales; f__Oxalobacteraceae; g__Massilia; s__unclassified_Massilia
ASV_1777	0.0	0.0	0.0	0.0	19.0	44.0	d__Bacteria; p__Bacteroidetes; c__[Saprospirae]; o__[Saprospirales]; f__Chitinophagaceae; g__unidentified_Chitinophagaceae; s__unidentified_Chitinophagaceae
ASV_15291	0.0	0.0	0.0	0.0	0.0	18.0	d__Bacteria; p__Firmicutes; c__Clostridia; o__Clostridiales; f__Ruminococcaceae; g__Oscillospira; s__unidentified_Oscillospira
ASV_21598	47.0	0.0	0.0	0.0	0.0	0.0	d__Bacteria; p__Firmicutes; c__Clostridia; o__Clostridiales; f__Ruminococcaceae; g__Oscillospira; s__unidentified_Oscillospira
ASV_23846	23.0	0.0	0.0	0.0	0.0	8.0	d__Bacteria; p__Proteobacteria; c__Alphaproteobacteria; o__Caulobacterales; f__Caulobacteraceae; g__Brevundimonas; s__Brevundimonas_diminuta
ASV_23059	24.0	0.0	0.0	0.0	0.0	33.0	d__Bacteria; p__Actinobacteria; c__Coriobacteriia; o__Coriobacteriales; f__Coriobacteriaceae; g__Adlercreutzia; s__unidentified_Adlercreutzia
ASV_3077	20.0	29.0	0.0	0.0	0.0	0.0	d__Bacteria; p__Firmicutes; c__Clostridia; o__Clostridiales; f__Lachnospiraceae; g__unidentified_Lachnospiraceae; s__unidentified_Lachnospiraceae
ASV_22544	7.0	11.0	0.0	0.0	0.0	0.0	d__Bacteria; p__Firmicutes; c__Clostridia; o__Clostridiales; f__Ruminococcaceae; g__unidentified_Ruminococcaceae; s__unidentified_Ruminococcaceae
ASV_22407	0.0	0.0	0.0	0.0	0.0	8.0	d__Bacteria; p__Bacteroidetes; c__Bacteroidia; o__Bacteroidales; f__unclassified_Bacteroidales; g__unclassified_Bacteroidales; s__unclassified_Bacteroidales
ASV_6723	0.0	0.0	0.0	0.0	0.0	48.0	d__Bacteria; p__Spirochaetes; c__Spirochaetes; o__Spirochaetales; f__Spirochaetaceae; g__Treponema; s__unidentified_Treponema
ASV_4139	0.0	0.0	0.0	7.0	7.0	4.0	d__Bacteria; p__Tenericutes; c__Mollicutes; o__RF39; f__unidentified_RF39; g__unidentified_RF39; s__unidentified_RF39
ASV_3416	0.0	0.0	0.0	12.0	0.0	37.0	d__Bacteria; p__Chloroflexi; c__Ellin6529; o__unidentified_Ellin6529; f__unidentified_Ellin6529; g__unidentified_Ellin6529; s__unidentified_Ellin6529
ASV_10744	0.0	0.0	0.0	1.0	38.0	24.0	d__Bacteria; p__Bacteroidetes; c__Flavobacteriia; o__Flavobacteriales; f__Flavobacteriaceae; g__Flavobacterium; s__Flavobacterium_frigidarium
ASV_21839	0.0	0.0	0.0	15.0	18.0	0.0	d__Bacteria; p__Firmicutes; c__Clostridia; o__Clostridiales; f__unidentified_Clostridiales; g__unidentified_Clostridiales; s__unidentified_Clostridiales
ASV_14218	0.0	0.0	0.0	7.0	34.0	0.0	d__Bacteria; p__Firmicutes; c__Clostridia; o__Clostridiales; f__Ruminococcaceae; g__Oscillospira; s__unidentified_Oscillospira
ASV_17541	0.0	0.0	0.0	0.0	33.0	24.0	d__Bacteria; p__Actinobacteria; c__Thermoleophilia; o__Gaiellales; f__Gaiellaceae; g__unidentified_Gaiellaceae; s__unidentified_Gaiellaceae
ASV_20845	0.0	0.0	0.0	0.0	0.0	54.0	d__Bacteria; p__Proteobacteria; c__Alphaproteobacteria; o__Rhizobiales; f__Phyllobacteriaceae; g__Mesorhizobium; s__unidentified_Mesorhizobium
ASV_25781	12.0	0.0	61.0	0.0	0.0	0.0	d__Bacteria; p__Firmicutes; c__Clostridia; o__Clostridiales; f__unidentified_Clostridiales; g__unidentified_Clostridiales; s__unidentified_Clostridiales
ASV_11895	1.0	0.0	7.0	21.0	1.0	11.0	d__Bacteria; p__Firmicutes; c__Clostridia; o__Clostridiales; f__unclassified_Clostridiales; g__unclassified_Clostridiales; s__unclassified_Clostridiales
ASV_1177	6.0	10.0	3.0	0.0	0.0	0.0	d__Bacteria; p__Firmicutes; c__Clostridia; o__Clostridiales; f__Christensenellaceae; g__unidentified_Christensenellaceae; s__unidentified_Christensenellaceae
ASV_18266	0.0	0.0	4.0	8.0	3.0	10.0	d__Bacteria; p__Firmicutes; c__Erysipelotrichi; o__Erysipelotrichales; f__Erysipelotrichaceae; g__p-75-a5; s__unidentified_p-75-a5
ASV_12321	0.0	0.0	7.0	0.0	0.0	17.0	d__Bacteria; p__Firmicutes; c__Clostridia; o__Clostridiales; f__Ruminococcaceae; g__unidentified_Ruminococcaceae; s__unidentified_Ruminococcaceae
ASV_23624	0.0	0.0	0.0	0.0	23.0	8.0	d__Bacteria; p__Bacteroidetes; c__Sphingobacteriia; o__Sphingobacteriales; f__Sphingobacteriaceae; g__unidentified_Sphingobacteriaceae; s__unidentified_Sphingobacteriaceae
ASV_13216	0.0	0.0	0.0	20.0	0.0	0.0	d__Bacteria; p__TM7; c__TM7-1; o__unidentified_TM7-1; f__unidentified_TM7-1; g__unidentified_TM7-1; s__unidentified_TM7-1
ASV_20041	0.0	0.0	0.0	0.0	0.0	33.0	d__Bacteria; p__Firmicutes; c__Clostridia; o__Clostridiales; f__Clostridiaceae; g__Proteiniclasticum; s__unidentified_Proteiniclasticum
ASV_16751	0.0	0.0	0.0	15.0	21.0	0.0	d__Bacteria; p__Actinobacteria; c__Actinobacteria; o__Actinomycetales; f__Geodermatophilaceae; g__unclassified_Geodermatophilaceae; s__unclassified_Geodermatophilaceae
ASV_11870	0.0	0.0	0.0	7.0	47.0	0.0	d__Bacteria; p__Proteobacteria; c__Alphaproteobacteria; o__Rhizobiales; f__Hyphomicrobiaceae; g__Devosia; s__unidentified_Devosia
ASV_15155	0.0	0.0	0.0	14.0	11.0	25.0	d__Bacteria; p__Proteobacteria; c__Alphaproteobacteria; o__Rhizobiales; f__Hyphomicrobiaceae; g__Rhodoplanes; s__unidentified_Rhodoplanes
ASV_22559	0.0	0.0	0.0	0.0	32.0	17.0	d__Bacteria; p__Firmicutes; c__Clostridia; o__Clostridiales; f__unidentified_Clostridiales; g__unidentified_Clostridiales; s__unidentified_Clostridiales
ASV_10061	0.0	0.0	0.0	0.0	26.0	34.0	d__Bacteria; p__TM7; c__TM7-1; o__unidentified_TM7-1; f__unidentified_TM7-1; g__unidentified_TM7-1; s__unidentified_TM7-1
ASV_20418	0.0	0.0	0.0	0.0	0.0	9.0	d__Bacteria; p__Firmicutes; c__Clostridia; o__Clostridiales; f__unclassified_Clostridiales; g__unclassified_Clostridiales; s__unclassified_Clostridiales
ASV_4618	36.0	25.0	0.0	0.0	0.0	1.0	d__Bacteria; p__Firmicutes; c__Clostridia; o__Clostridiales; f__unidentified_Clostridiales; g__unidentified_Clostridiales; s__unidentified_Clostridiales
ASV_95	19.0	6.0	0.0	4.0	0.0	0.0	d__Bacteria; p__Firmicutes; c__Clostridia; o__Clostridiales; f__Ruminococcaceae; g__unidentified_Ruminococcaceae; s__unidentified_Ruminococcaceae
ASV_2455	6.0	0.0	0.0	0.0	0.0	50.0	d__Bacteria; p__Firmicutes; c__Clostridia; o__Clostridiales; f__Ruminococcaceae; g__Oscillospira; s__unidentified_Oscillospira
ASV_4113	0.0	10.0	0.0	0.0	0.0	0.0	d__Bacteria; p__Firmicutes; c__Clostridia; o__Clostridiales; f__unidentified_Clostridiales; g__unidentified_Clostridiales; s__unidentified_Clostridiales
ASV_1327	0.0	0.0	0.0	5.0	36.0	0.0	d__Bacteria; p__Actinobacteria; c__Actinobacteria; o__Actinomycetales; f__Micrococcaceae; g__Rothia; s__Rothia_nasimurium
ASV_18185	0.0	0.0	0.0	13.0	0.0	20.0	d__Bacteria; p__Acidobacteria; c__Acidobacteriia; o__Acidobacteriales; f__Acidobacteriaceae; g__unidentified_Acidobacteriaceae; s__unidentified_Acidobacteriaceae
ASV_22351	0.0	0.0	0.0	26.0	0.0	0.0	d__Bacteria; p__Firmicutes; c__Clostridia; o__Clostridiales; f__Ruminococcaceae; g__unclassified_Ruminococcaceae; s__unclassified_Ruminococcaceae
ASV_5079	0.0	0.0	0.0	22.0	0.0	23.0	d__Bacteria; p__Firmicutes; c__Bacilli; o__Bacillales; f__Planococcaceae; g__Sporosarcina; s__unclassified_Sporosarcina
ASV_16391	0.0	0.0	0.0	35.0	0.0	0.0	d__Bacteria; p__Firmicutes; c__Clostridia; o__Clostridiales; f__Peptostreptococcaceae; g__Clostridium; s__Clostridium_sticklandii
ASV_25160	0.0	0.0	0.0	0.0	56.0	0.0	d__Bacteria; p__Firmicutes; c__Clostridia; o__Clostridiales; f__unidentified_Clostridiales; g__unidentified_Clostridiales; s__unidentified_Clostridiales
ASV_21286	4.0	0.0	9.0	2.0	2.0	19.0	d__Bacteria; p__Firmicutes; c__Erysipelotrichi; o__Erysipelotrichales; f__Erysipelotrichaceae; g__p-75-a5; s__unidentified_p-75-a5
ASV_11957	25.0	41.0	0.0	0.0	0.0	0.0	d__Bacteria; p__Firmicutes; c__Clostridia; o__Clostridiales; f__Ruminococcaceae; g__Oscillospira; s__unidentified_Oscillospira
ASV_15667	6.0	0.0	22.0	10.0	0.0	13.0	d__Bacteria; p__Firmicutes; c__Clostridia; o__Clostridiales; f__Ruminococcaceae; g__Oscillospira; s__unidentified_Oscillospira
ASV_10893	0.0	0.0	6.0	0.0	0.0	0.0	d__Bacteria; p__Bacteroidetes; c__Bacteroidia; o__Bacteroidales; f__unclassified_Bacteroidales; g__unclassified_Bacteroidales; s__unclassified_Bacteroidales
ASV_22972	0.0	0.0	0.0	27.0	8.0	0.0	d__Bacteria; p__Tenericutes; c__Mollicutes; o__RF39; f__unidentified_RF39; g__unidentified_RF39; s__unidentified_RF39
ASV_18049	0.0	0.0	0.0	9.0	22.0	18.0	d__Bacteria; p__Bacteroidetes; c__Flavobacteriia; o__Flavobacteriales; f__Flavobacteriaceae; g__Flavobacterium; s__Flavobacterium_frigidarium
ASV_6514	0.0	0.0	0.0	0.0	2.0	19.0	d__Bacteria; p__Spirochaetes; c__Spirochaetes; o__Spirochaetales; f__Spirochaetaceae; g__Treponema; s__unidentified_Treponema
ASV_4227	0.0	0.0	0.0	0.0	61.0	0.0	d__Bacteria; p__TM7; c__TM7-1; o__unidentified_TM7-1; f__unidentified_TM7-1; g__unidentified_TM7-1; s__unidentified_TM7-1
ASV_25693	0.0	0.0	0.0	0.0	47.0	14.0	d__Bacteria; p__Actinobacteria; c__Thermoleophilia; o__Gaiellales; f__Gaiellaceae; g__unidentified_Gaiellaceae; s__unidentified_Gaiellaceae
ASV_11146	0.0	0.0	0.0	0.0	0.0	58.0	d__Bacteria; p__Actinobacteria; c__Actinobacteria; o__Actinomycetales; f__Frankiaceae; g__unidentified_Frankiaceae; s__unidentified_Frankiaceae
ASV_5131	0.0	0.0	0.0	0.0	0.0	56.0	d__Bacteria; p__Actinobacteria; c__Thermoleophilia; o__Gaiellales; f__Gaiellaceae; g__unidentified_Gaiellaceae; s__unidentified_Gaiellaceae
ASV_12936	28.0	14.0	0.0	0.0	0.0	0.0	d__Bacteria; p__Firmicutes; c__Clostridia; o__Clostridiales; f__Lachnospiraceae; g__Coprococcus; s__unidentified_Coprococcus
ASV_10525	11.0	0.0	0.0	0.0	31.0	15.0	d__Bacteria; p__Proteobacteria; c__Gammaproteobacteria; o__Pseudomonadales; f__Moraxellaceae; g__Acinetobacter; s__Acinetobacter_johnsonii
ASV_5086	0.0	0.0	0.0	25.0	27.0	0.0	d__Bacteria; p__TM7; c__TM7-1; o__unidentified_TM7-1; f__unidentified_TM7-1; g__unidentified_TM7-1; s__unidentified_TM7-1
ASV_25699	0.0	0.0	0.0	18.0	0.0	35.0	d__Bacteria; p__Firmicutes; c__Clostridia; o__Clostridiales; f__Ruminococcaceae; g__unidentified_Ruminococcaceae; s__unidentified_Ruminococcaceae
ASV_14735	0.0	0.0	0.0	0.0	53.0	0.0	d__Bacteria; p__TM7; c__TM7-1; o__unidentified_TM7-1; f__unidentified_TM7-1; g__unidentified_TM7-1; s__unidentified_TM7-1
ASV_18852	0.0	0.0	0.0	0.0	0.0	53.0	d__Bacteria; p__Firmicutes; c__Clostridia; o__Clostridiales; f__Caldicoprobacteraceae; g__Caldicoprobacter; s__unidentified_Caldicoprobacter
ASV_25772	13.0	18.0	3.0	6.0	0.0	0.0	d__Bacteria; p__Firmicutes; c__Erysipelotrichi; o__Erysipelotrichales; f__Erysipelotrichaceae; g__unidentified_Erysipelotrichaceae; s__unidentified_Erysipelotrichaceae
ASV_6741	6.0	0.0	9.0	0.0	0.0	11.0	d__Bacteria; p__Firmicutes; c__Clostridia; o__Clostridiales; f__Ruminococcaceae; g__unidentified_Ruminococcaceae; s__unidentified_Ruminococcaceae
ASV_20788	25.0	15.0	0.0	0.0	0.0	22.0	d__Bacteria; p__Actinobacteria; c__Actinobacteria; o__Bifidobacteriales; f__Bifidobacteriaceae; g__Bifidobacterium; s__Bifidobacterium_thermacidophilum
ASV_14464	17.0	0.0	6.0	0.0	13.0	0.0	d__Bacteria; p__Firmicutes; c__Clostridia; o__Clostridiales; f__Christensenellaceae; g__unidentified_Christensenellaceae; s__unidentified_Christensenellaceae
ASV_2809	0.0	17.0	0.0	0.0	0.0	0.0	d__Bacteria; p__Firmicutes; c__Clostridia; o__Clostridiales; f__unclassified_Clostridiales; g__unclassified_Clostridiales; s__unclassified_Clostridiales
ASV_21471	0.0	51.0	0.0	0.0	0.0	0.0	d__Bacteria; p__Firmicutes; c__Clostridia; o__Clostridiales; f__Ruminococcaceae; g__Oscillospira; s__unidentified_Oscillospira
ASV_14872	0.0	35.0	37.0	0.0	0.0	0.0	d__Bacteria; p__Firmicutes; c__Clostridia; o__Clostridiales; f__Ruminococcaceae; g__Ruminococcus; s__Ruminococcus_bromii
ASV_26404	0.0	0.0	0.0	18.0	0.0	16.0	d__Bacteria; p__Bacteroidetes; c__Bacteroidia; o__Bacteroidales; f__Bacteroidaceae; g__Bacteroides; s__Bacteroides_caccae
ASV_14707	0.0	0.0	0.0	0.0	21.0	20.0	d__Bacteria; p__Bacteroidetes; c__Bacteroidia; o__Bacteroidales; f__Prevotellaceae; g__Prevotella; s__unidentified_Prevotella
ASV_6323	8.0	0.0	0.0	0.0	0.0	27.0	d__Bacteria; p__Firmicutes; c__Clostridia; o__Clostridiales; f__Lachnospiraceae; g__Roseburia; s__unidentified_Roseburia
ASV_1651	0.0	0.0	0.0	5.0	14.0	9.0	d__Bacteria; p__Firmicutes; c__Clostridia; o__Clostridiales; f__Christensenellaceae; g__unidentified_Christensenellaceae; s__unidentified_Christensenellaceae
ASV_21504	0.0	0.0	0.0	11.0	0.0	28.0	d__Bacteria; p__Bacteroidetes; c__[Saprospirae]; o__[Saprospirales]; f__Chitinophagaceae; g__unidentified_Chitinophagaceae; s__unidentified_Chitinophagaceae
ASV_11136	0.0	0.0	0.0	0.0	0.0	34.0	d__Bacteria; p__Actinobacteria; c__Actinobacteria; o__Actinomycetales; f__Nocardioidaceae; g__Nocardioides; s__unidentified_Nocardioides
ASV_4726	0.0	0.0	0.0	12.0	11.0	0.0	d__Bacteria; p__Actinobacteria; c__Thermoleophilia; o__Solirubrobacterales; f__unidentified_Solirubrobacterales; g__unidentified_Solirubrobacterales; s__unidentified_Solirubrobacterales
ASV_23884	0.0	0.0	0.0	21.0	26.0	0.0	d__Bacteria; p__Acidobacteria; c__Solibacteres; o__Solibacterales; f__Solibacteraceae; g__Candidatus_Solibacter; s__unidentified_Candidatus_Solibacter
ASV_17970	0.0	0.0	0.0	30.0	0.0	8.0	d__Bacteria; p__Proteobacteria; c__Betaproteobacteria; o__Burkholderiales; f__Comamonadaceae; g__unclassified_Comamonadaceae; s__unclassified_Comamonadaceae
ASV_3700	0.0	0.0	0.0	0.0	30.0	11.0	d__Bacteria; p__Firmicutes; c__Clostridia; o__Clostridiales; f__Lachnospiraceae; g__Dorea; s__unidentified_Dorea
ASV_257	13.0	0.0	0.0	0.0	0.0	0.0	d__Bacteria; p__Bacteroidetes; c__Bacteroidia; o__Bacteroidales; f__Prevotellaceae; g__Prevotella; s__unidentified_Prevotella
ASV_2192	8.0	0.0	0.0	4.0	0.0	0.0	d__Bacteria; p__Proteobacteria; c__Gammaproteobacteria; o__Pseudomonadales; f__Moraxellaceae; g__Acinetobacter; s__Acinetobacter_johnsonii
ASV_25169	0.0	0.0	0.0	10.0	35.0	0.0	d__Bacteria; p__Actinobacteria; c__Actinobacteria; o__Actinomycetales; f__Geodermatophilaceae; g__unclassified_Geodermatophilaceae; s__unclassified_Geodermatophilaceae
ASV_8417	0.0	0.0	0.0	13.0	0.0	32.0	d__Bacteria; p__Proteobacteria; c__Deltaproteobacteria; o__Myxococcales; f__Haliangiaceae; g__unidentified_Haliangiaceae; s__unidentified_Haliangiaceae
ASV_25782	0.0	0.0	0.0	30.0	0.0	0.0	d__Bacteria; p__Proteobacteria; c__Betaproteobacteria; o__Burkholderiales; f__Burkholderiaceae; g__Burkholderia; s__unidentified_Burkholderia
ASV_6071	0.0	0.0	0.0	0.0	61.0	0.0	d__Bacteria; p__Firmicutes; c__Clostridia; o__Clostridiales; f__Clostridiaceae; g__Caloramator; s__unidentified_Caloramator
ASV_5951	0.0	0.0	0.0	0.0	33.0	22.0	d__Bacteria; p__Proteobacteria; c__Gammaproteobacteria; o__Xanthomonadales; f__Xanthomonadaceae; g__unidentified_Xanthomonadaceae; s__unidentified_Xanthomonadaceae
ASV_3045	9.0	0.0	18.0	0.0	0.0	28.0	d__Bacteria; p__[Thermi]; c__Deinococci; o__Deinococcales; f__Deinococcaceae; g__Deinococcus; s__unidentified_Deinococcus
ASV_14412	0.0	6.0	0.0	0.0	0.0	0.0	d__Bacteria; p__Firmicutes; c__Clostridia; o__Clostridiales; f__Lachnospiraceae; g__unidentified_Lachnospiraceae; s__unidentified_Lachnospiraceae
ASV_24632	0.0	8.0	0.0	0.0	0.0	26.0	d__Bacteria; p__Proteobacteria; c__Alphaproteobacteria; o__Rhizobiales; f__Beijerinckiaceae; g__Chelatococcus; s__unidentified_Chelatococcus
ASV_7525	0.0	23.0	0.0	0.0	0.0	0.0	d__Bacteria; p__Proteobacteria; c__Alphaproteobacteria; o__Rhodospirillales; f__Rhodospirillaceae; g__Reyranella; s__Reyranella_massiliensis
ASV_11939	0.0	0.0	25.0	0.0	8.0	4.0	d__Bacteria; p__Firmicutes; c__Bacilli; o__Bacillales; f__Bacillaceae; g__Bacillus; s__unclassified_Bacillus
ASV_14450	0.0	0.0	0.0	2.0	12.0	0.0	d__Bacteria; p__Firmicutes; c__Clostridia; o__Clostridiales; f__Ruminococcaceae; g__Oscillospira; s__unidentified_Oscillospira
ASV_12867	0.0	0.0	0.0	0.0	5.0	0.0	d__Bacteria; p__Firmicutes; c__Clostridia; o__Clostridiales; f__[Mogibacteriaceae]; g__unidentified_[Mogibacteriaceae]; s__unidentified_[Mogibacteriaceae]
ASV_12507	0.0	0.0	0.0	12.0	0.0	39.0	d__Bacteria; p__Firmicutes; c__Clostridia; o__Clostridiales; f__[Mogibacteriaceae]; g__unidentified_[Mogibacteriaceae]; s__unidentified_[Mogibacteriaceae]
ASV_4007	0.0	0.0	0.0	14.0	40.0	0.0	d__Bacteria; p__Actinobacteria; c__Actinobacteria; o__Actinomycetales; f__Micromonosporaceae; g__unclassified_Micromonosporaceae; s__unclassified_Micromonosporaceae
ASV_21948	0.0	0.0	0.0	36.0	0.0	0.0	d__Bacteria; p__Actinobacteria; c__unclassified_Actinobacteria; o__unclassified_Actinobacteria; f__unclassified_Actinobacteria; g__unclassified_Actinobacteria; s__unclassified_Actinobacteria
ASV_6920	0.0	0.0	0.0	39.0	0.0	0.0	d__Bacteria; p__Firmicutes; c__Clostridia; o__Clostridiales; f__Lachnospiraceae; g__Blautia; s__unidentified_Blautia
ASV_3406	0.0	0.0	0.0	40.0	0.0	0.0	d__Bacteria; p__Firmicutes; c__Clostridia; o__Clostridiales; f__unidentified_Clostridiales; g__unidentified_Clostridiales; s__unidentified_Clostridiales
ASV_19989	0.0	0.0	0.0	31.0	0.0	15.0	d__Bacteria; p__Proteobacteria; c__Gammaproteobacteria; o__Pseudomonadales; f__Moraxellaceae; g__Acinetobacter; s__unclassified_Acinetobacter
ASV_4971	0.0	0.0	0.0	0.0	8.0	0.0	d__Bacteria; p__Firmicutes; c__Clostridia; o__Clostridiales; f__unclassified_Clostridiales; g__unclassified_Clostridiales; s__unclassified_Clostridiales
ASV_23778	0.0	0.0	0.0	0.0	0.0	21.0	d__Bacteria; p__Firmicutes; c__Clostridia; o__Clostridiales; f__Ruminococcaceae; g__unidentified_Ruminococcaceae; s__unidentified_Ruminococcaceae
ASV_5446	0.0	29.0	0.0	20.0	0.0	0.0	d__Bacteria; p__Firmicutes; c__Clostridia; o__Clostridiales; f__unclassified_Clostridiales; g__unclassified_Clostridiales; s__unclassified_Clostridiales
ASV_8567	0.0	0.0	6.0	0.0	30.0	0.0	d__Bacteria; p__Bacteroidetes; c__Bacteroidia; o__Bacteroidales; f__unidentified_Bacteroidales; g__unidentified_Bacteroidales; s__unidentified_Bacteroidales
ASV_15020	0.0	0.0	7.0	18.0	0.0	0.0	d__Bacteria; p__Firmicutes; c__Clostridia; o__Clostridiales; f__unidentified_Clostridiales; g__unidentified_Clostridiales; s__unidentified_Clostridiales
ASV_6372	0.0	0.0	17.0	3.0	0.0	31.0	d__Bacteria; p__Firmicutes; c__Clostridia; o__Clostridiales; f__Lachnospiraceae; g__unidentified_Lachnospiraceae; s__unidentified_Lachnospiraceae
ASV_419	0.0	0.0	0.0	9.0	0.0	0.0	d__Bacteria; p__Firmicutes; c__Erysipelotrichi; o__Erysipelotrichales; f__Erysipelotrichaceae; g__Holdemania; s__unidentified_Holdemania
ASV_12678	0.0	0.0	0.0	23.0	0.0	13.0	d__Bacteria; p__Firmicutes; c__Clostridia; o__Clostridiales; f__Clostridiaceae; g__Sarcina; s__unidentified_Sarcina
ASV_425	0.0	0.0	0.0	0.0	27.0	0.0	d__Bacteria; p__Acidobacteria; c__[Chloracidobacteria]; o__RB41; f__unidentified_RB41; g__unidentified_RB41; s__unidentified_RB41
ASV_14367	0.0	0.0	0.0	0.0	0.0	42.0	d__Bacteria; p__Actinobacteria; c__Actinobacteria; o__Actinomycetales; f__Streptomycetaceae; g__Streptomyces; s__unclassified_Streptomyces
ASV_8849	0.0	0.0	0.0	14.0	37.0	0.0	d__Bacteria; p__Firmicutes; c__Clostridia; o__Clostridiales; f__Ruminococcaceae; g__unidentified_Ruminococcaceae; s__unidentified_Ruminococcaceae
ASV_1500	0.0	0.0	0.0	12.0	36.0	0.0	d__Bacteria; p__Acidobacteria; c__Solibacteres; o__Solibacterales; f__unidentified_Solibacterales; g__unidentified_Solibacterales; s__unidentified_Solibacterales
ASV_13924	0.0	0.0	0.0	0.0	44.0	7.0	d__Bacteria; p__Proteobacteria; c__Betaproteobacteria; o__Burkholderiales; f__Comamonadaceae; g__Polaromonas; s__unidentified_Polaromonas
ASV_12082	0.0	0.0	0.0	0.0	0.0	51.0	d__Bacteria; p__Verrucomicrobia; c__[Spartobacteria]; o__[Chthoniobacterales]; f__[Chthoniobacteraceae]; g__DA101; s__unidentified_DA101
ASV_3559	0.0	0.0	0.0	0.0	0.0	27.0	d__Bacteria; p__Firmicutes; c__Clostridia; o__Clostridiales; f__Ruminococcaceae; g__unidentified_Ruminococcaceae; s__unidentified_Ruminococcaceae
ASV_3153	0.0	41.0	0.0	0.0	0.0	0.0	d__Bacteria; p__Firmicutes; c__Bacilli; o__Lactobacillales; f__Lactobacillaceae; g__Lactobacillus; s__unidentified_Lactobacillus
ASV_25574	0.0	15.0	17.0	8.0	0.0	0.0	d__Bacteria; p__Firmicutes; c__Clostridia; o__Clostridiales; f__unidentified_Clostridiales; g__unidentified_Clostridiales; s__unidentified_Clostridiales
ASV_16908	0.0	0.0	0.0	0.0	9.0	10.0	d__Bacteria; p__Bacteroidetes; c__Bacteroidia; o__Bacteroidales; f__unidentified_Bacteroidales; g__unidentified_Bacteroidales; s__unidentified_Bacteroidales
ASV_2142	0.0	0.0	0.0	6.0	0.0	24.0	d__Bacteria; p__Spirochaetes; c__Spirochaetes; o__Spirochaetales; f__Spirochaetaceae; g__Treponema; s__unidentified_Treponema
ASV_24877	0.0	0.0	0.0	18.0	0.0	0.0	d__Bacteria; p__Actinobacteria; c__Actinobacteria; o__Actinomycetales; f__Thermomonosporaceae; g__Actinomadura; s__Actinomadura_alba
ASV_25025	0.0	0.0	0.0	0.0	26.0	12.0	d__Bacteria; p__Firmicutes; c__Clostridia; o__Clostridiales; f__Ruminococcaceae; g__Ruminococcus; s__unidentified_Ruminococcus
ASV_8118	0.0	0.0	0.0	12.0	0.0	0.0	d__Bacteria; p__Firmicutes; c__Clostridia; o__Clostridiales; f__unidentified_Clostridiales; g__unidentified_Clostridiales; s__unidentified_Clostridiales
ASV_20019	0.0	0.0	0.0	16.0	32.0	0.0	d__Bacteria; p__Firmicutes; c__Bacilli; o__Bacillales; f__Bacillaceae; g__Bacillus; s__Bacillus_flexus
ASV_20337	0.0	0.0	0.0	34.0	0.0	0.0	d__Bacteria; p__Bacteroidetes; c__Flavobacteriia; o__Flavobacteriales; f__Flavobacteriaceae; g__Flavobacterium; s__Flavobacterium_frigidarium
ASV_3291	0.0	0.0	0.0	10.0	38.0	0.0	d__Bacteria; p__Actinobacteria; c__Actinobacteria; o__Actinomycetales; f__Microbacteriaceae; g__unclassified_Microbacteriaceae; s__unclassified_Microbacteriaceae
ASV_3938	0.0	0.0	0.0	36.0	0.0	0.0	d__Bacteria; p__Firmicutes; c__Bacilli; o__Lactobacillales; f__Lactobacillaceae; g__Lactobacillus; s__unidentified_Lactobacillus
ASV_22489	0.0	0.0	0.0	0.0	15.0	0.0	d__Bacteria; p__Firmicutes; c__Clostridia; o__Clostridiales; f__Ruminococcaceae; g__unidentified_Ruminococcaceae; s__unidentified_Ruminococcaceae
ASV_3184	0.0	0.0	0.0	0.0	14.0	19.0	d__Bacteria; p__Gemmatimonadetes; c__Gemmatimonadetes; o__Ellin5290; f__unidentified_Ellin5290; g__unidentified_Ellin5290; s__unidentified_Ellin5290
ASV_8960	0.0	0.0	0.0	0.0	0.0	53.0	d__Bacteria; p__Firmicutes; c__Clostridia; o__Clostridiales; f__Lachnospiraceae; g__Shuttleworthia; s__unidentified_Shuttleworthia
ASV_25762	0.0	0.0	30.0	0.0	0.0	0.0	d__Bacteria; p__Proteobacteria; c__Alphaproteobacteria; o__Rhizobiales; f__unclassified_Rhizobiales; g__unclassified_Rhizobiales; s__unclassified_Rhizobiales
ASV_24618	0.0	0.0	0.0	12.0	0.0	0.0	d__Bacteria; p__Firmicutes; c__Clostridia; o__Clostridiales; f__Lachnospiraceae; g__unidentified_Lachnospiraceae; s__unidentified_Lachnospiraceae
ASV_24287	0.0	0.0	0.0	24.0	0.0	0.0	d__Bacteria; p__Firmicutes; c__Bacilli; o__Bacillales; f__Bacillaceae; g__Bacillus; s__unidentified_Bacillus
ASV_12894	0.0	0.0	0.0	1.0	0.0	0.0	d__Bacteria; p__Firmicutes; c__Clostridia; o__Clostridiales; f__unidentified_Clostridiales; g__unidentified_Clostridiales; s__unidentified_Clostridiales
ASV_18298	0.0	0.0	0.0	26.0	0.0	0.0	d__Bacteria; p__Firmicutes; c__Clostridia; o__Clostridiales; f__Clostridiaceae; g__Proteiniclasticum; s__unidentified_Proteiniclasticum
ASV_12740	0.0	0.0	0.0	4.0	8.0	0.0	d__Bacteria; p__Proteobacteria; c__Betaproteobacteria; o__Burkholderiales; f__Comamonadaceae; g__unclassified_Comamonadaceae; s__unclassified_Comamonadaceae
ASV_10948	0.0	0.0	0.0	9.0	39.0	0.0	d__Bacteria; p__Actinobacteria; c__Thermoleophilia; o__Solirubrobacterales; f__Solirubrobacteraceae; g__unidentified_Solirubrobacteraceae; s__unidentified_Solirubrobacteraceae
ASV_5944	0.0	0.0	0.0	9.0	17.0	6.0	d__Bacteria; p__Firmicutes; c__Clostridia; o__Clostridiales; f__Ruminococcaceae; g__unidentified_Ruminococcaceae; s__unidentified_Ruminococcaceae
ASV_22497	0.0	0.0	0.0	0.0	38.0	18.0	d__Bacteria; p__Actinobacteria; c__Thermoleophilia; o__Gaiellales; f__Gaiellaceae; g__unidentified_Gaiellaceae; s__unidentified_Gaiellaceae
ASV_20498	0.0	0.0	0.0	0.0	13.0	0.0	d__Bacteria; p__Bacteroidetes; c__Bacteroidia; o__Bacteroidales; f__Prevotellaceae; g__Prevotella; s__unidentified_Prevotella
ASV_1922	0.0	0.0	0.0	0.0	8.0	37.0	d__Bacteria; p__Proteobacteria; c__Deltaproteobacteria; o__Myxococcales; f__unidentified_Myxococcales; g__unidentified_Myxococcales; s__unidentified_Myxococcales
ASV_14520	0.0	0.0	0.0	0.0	0.0	25.0	d__Bacteria; p__Proteobacteria; c__Gammaproteobacteria; o__Aeromonadales; f__Succinivibrionaceae; g__Succinivibrio; s__unidentified_Succinivibrio
ASV_17209	0.0	0.0	0.0	0.0	0.0	45.0	d__Bacteria; p__Firmicutes; c__Clostridia; o__Clostridiales; f__unclassified_Clostridiales; g__unclassified_Clostridiales; s__unclassified_Clostridiales
ASV_18032	45.0	7.0	0.0	0.0	0.0	0.0	d__Bacteria; p__Bacteroidetes; c__Cytophagia; o__Cytophagales; f__Cytophagaceae; g__Runella; s__unidentified_Runella
ASV_487	42.0	6.0	7.0	0.0	0.0	0.0	d__Bacteria; p__Firmicutes; c__Clostridia; o__Clostridiales; f__Ruminococcaceae; g__Oscillospira; s__unidentified_Oscillospira
ASV_15320	0.0	0.0	31.0	0.0	0.0	13.0	d__Bacteria; p__Bacteroidetes; c__Sphingobacteriia; o__Sphingobacteriales; f__Sphingobacteriaceae; g__unidentified_Sphingobacteriaceae; s__unidentified_Sphingobacteriaceae
ASV_407	0.0	0.0	0.0	4.0	2.0	0.0	d__Bacteria; p__Bacteroidetes; c__Sphingobacteriia; o__Sphingobacteriales; f__unidentified_Sphingobacteriales; g__unidentified_Sphingobacteriales; s__unidentified_Sphingobacteriales
ASV_26270	0.0	0.0	0.0	0.0	0.0	38.0	d__Bacteria; p__unclassified_Bacteria; c__unclassified_Bacteria; o__unclassified_Bacteria; f__unclassified_Bacteria; g__unclassified_Bacteria; s__unclassified_Bacteria
ASV_9830	0.0	0.0	0.0	0.0	0.0	34.0	d__Bacteria; p__Actinobacteria; c__Actinobacteria; o__Actinomycetales; f__Micromonosporaceae; g__Dactylosporangium; s__unidentified_Dactylosporangium
ASV_24517	0.0	0.0	0.0	15.0	7.0	18.0	d__Bacteria; p__Firmicutes; c__Bacilli; o__Bacillales; f__Paenibacillaceae; g__Ammoniphilus; s__unidentified_Ammoniphilus
ASV_7630	0.0	0.0	0.0	37.0	0.0	0.0	d__Bacteria; p__Firmicutes; c__Clostridia; o__Clostridiales; f__Clostridiaceae; g__Proteiniclasticum; s__unidentified_Proteiniclasticum
ASV_9277	0.0	0.0	0.0	31.0	0.0	0.0	d__Bacteria; p__Actinobacteria; c__Actinobacteria; o__Actinomycetales; f__Micromonosporaceae; g__unclassified_Micromonosporaceae; s__unclassified_Micromonosporaceae
ASV_14353	0.0	0.0	0.0	33.0	0.0	0.0	d__Bacteria; p__Actinobacteria; c__Actinobacteria; o__Actinomycetales; f__Pseudonocardiaceae; g__Pseudonocardia; s__unclassified_Pseudonocardia
ASV_2748	0.0	0.0	0.0	17.0	25.0	0.0	d__Bacteria; p__Proteobacteria; c__Gammaproteobacteria; o__Pseudomonadales; f__Moraxellaceae; g__Acinetobacter; s__Acinetobacter_lwoffii
ASV_25328	0.0	0.0	0.0	32.0	0.0	0.0	d__Bacteria; p__Actinobacteria; c__Actinobacteria; o__Actinomycetales; f__Mycobacteriaceae; g__Mycobacterium; s__Mycobacterium_vaccae
ASV_4302	0.0	0.0	0.0	0.0	57.0	0.0	d__Bacteria; p__Acidobacteria; c__Acidobacteriia; o__Acidobacteriales; f__Acidobacteriaceae; g__Terriglobus; s__Terriglobus_saanensis
ASV_22055	0.0	0.0	0.0	0.0	38.0	18.0	d__Bacteria; p__Chloroflexi; c__TK10; o__B07_WMSP1; f__unidentified_B07_WMSP1; g__unidentified_B07_WMSP1; s__unidentified_B07_WMSP1
ASV_7919	0.0	0.0	0.0	0.0	0.0	47.0	d__Bacteria; p__Bacteroidetes; c__Bacteroidia; o__Bacteroidales; f__[Paraprevotellaceae]; g__CF231; s__unidentified_CF231
ASV_23505	0.0	0.0	0.0	0.0	0.0	55.0	d__Bacteria; p__Actinobacteria; c__Actinobacteria; o__Actinomycetales; f__Nocardioidaceae; g__unidentified_Nocardioidaceae; s__unidentified_Nocardioidaceae
ASV_16474	31.0	0.0	0.0	0.0	0.0	0.0	d__Bacteria; p__Bacteroidetes; c__Bacteroidia; o__Bacteroidales; f__unidentified_Bacteroidales; g__unidentified_Bacteroidales; s__unidentified_Bacteroidales
ASV_11603	0.0	0.0	7.0	0.0	0.0	24.0	d__Bacteria; p__Firmicutes; c__Clostridia; o__Clostridiales; f__unidentified_Clostridiales; g__unidentified_Clostridiales; s__unidentified_Clostridiales
ASV_20770	0.0	0.0	0.0	37.0	0.0	0.0	d__Bacteria; p__Firmicutes; c__Bacilli; o__Bacillales; f__Bacillaceae; g__Bacillus; s__unidentified_Bacillus
ASV_22028	0.0	0.0	0.0	27.0	0.0	0.0	d__Bacteria; p__Actinobacteria; c__Actinobacteria; o__Actinomycetales; f__Streptosporangiaceae; g__Sphaerisporangium; s__unidentified_Sphaerisporangium
ASV_26371	0.0	0.0	0.0	24.0	13.0	0.0	d__Bacteria; p__Acidobacteria; c__Acidobacteriia; o__Acidobacteriales; f__Acidobacteriaceae; g__unidentified_Acidobacteriaceae; s__unidentified_Acidobacteriaceae
ASV_12466	0.0	0.0	0.0	0.0	43.0	0.0	d__Bacteria; p__Armatimonadetes; c__Armatimonadia; o__FW68; f__unidentified_FW68; g__unidentified_FW68; s__unidentified_FW68
ASV_22924	0.0	0.0	0.0	0.0	0.0	32.0	d__Bacteria; p__Proteobacteria; c__Gammaproteobacteria; o__Legionellales; f__Legionellaceae; g__unclassified_Legionellaceae; s__unclassified_Legionellaceae
ASV_4685	2.0	0.0	13.0	4.0	0.0	6.0	d__Bacteria; p__Firmicutes; c__Bacilli; o__Lactobacillales; f__Lactobacillaceae; g__Lactobacillus; s__unidentified_Lactobacillus
ASV_1490	3.0	45.0	0.0	0.0	0.0	0.0	d__Bacteria; p__Firmicutes; c__Erysipelotrichi; o__Erysipelotrichales; f__Erysipelotrichaceae; g__unidentified_Erysipelotrichaceae; s__unidentified_Erysipelotrichaceae
ASV_12771	8.0	0.0	0.0	14.0	0.0	0.0	d__Bacteria; p__Firmicutes; c__Clostridia; o__Clostridiales; f__Lachnospiraceae; g__unclassified_Lachnospiraceae; s__unclassified_Lachnospiraceae
ASV_9425	5.0	0.0	0.0	0.0	37.0	0.0	d__Bacteria; p__Proteobacteria; c__Gammaproteobacteria; o__Alteromonadales; f__Shewanellaceae; g__Shewanella; s__unidentified_Shewanella
ASV_14395	16.0	0.0	0.0	18.0	0.0	0.0	d__Bacteria; p__Firmicutes; c__Clostridia; o__Clostridiales; f__Lachnospiraceae; g__unidentified_Lachnospiraceae; s__unidentified_Lachnospiraceae
ASV_4882	0.0	11.0	0.0	0.0	17.0	0.0	d__Bacteria; p__Spirochaetes; c__Spirochaetes; o__Spirochaetales; f__Spirochaetaceae; g__Treponema; s__unidentified_Treponema
ASV_2226	0.0	21.0	0.0	0.0	0.0	0.0	d__Bacteria; p__Firmicutes; c__Clostridia; o__Clostridiales; f__unclassified_Clostridiales; g__unclassified_Clostridiales; s__unclassified_Clostridiales
ASV_17995	0.0	0.0	0.0	0.0	0.0	11.0	d__Bacteria; p__Firmicutes; c__Clostridia; o__Clostridiales; f__Lachnospiraceae; g__unidentified_Lachnospiraceae; s__unidentified_Lachnospiraceae
ASV_588	0.0	0.0	0.0	0.0	0.0	22.0	d__Bacteria; p__Proteobacteria; c__Alphaproteobacteria; o__Rhizobiales; f__Bradyrhizobiaceae; g__Bosea; s__Bosea_genosp.
ASV_2699	0.0	0.0	0.0	7.0	36.0	0.0	d__Bacteria; p__Bacteroidetes; c__Flavobacteriia; o__Flavobacteriales; f__Flavobacteriaceae; g__Flavobacterium; s__Flavobacterium_frigidarium
ASV_16652	0.0	0.0	0.0	14.0	0.0	30.0	d__Bacteria; p__Proteobacteria; c__Alphaproteobacteria; o__Rhizobiales; f__Bradyrhizobiaceae; g__unclassified_Bradyrhizobiaceae; s__unclassified_Bradyrhizobiaceae
ASV_7062	0.0	0.0	0.0	16.0	10.0	8.0	d__Bacteria; p__Proteobacteria; c__Betaproteobacteria; o__Burkholderiales; f__Comamonadaceae; g__Delftia; s__unidentified_Delftia
ASV_10516	0.0	0.0	0.0	15.0	31.0	0.0	d__Bacteria; p__Proteobacteria; c__Betaproteobacteria; o__SC-I-84; f__unidentified_SC-I-84; g__unidentified_SC-I-84; s__unidentified_SC-I-84
ASV_3124	0.0	0.0	0.0	8.0	0.0	25.0	d__Bacteria; p__Firmicutes; c__Clostridia; o__Clostridiales; f__unclassified_Clostridiales; g__unclassified_Clostridiales; s__unclassified_Clostridiales
ASV_12498	0.0	0.0	0.0	0.0	49.0	0.0	d__Bacteria; p__Proteobacteria; c__Betaproteobacteria; o__Burkholderiales; f__Alcaligenaceae; g__Castellaniella; s__Castellaniella_defragrans
ASV_20646	0.0	0.0	0.0	0.0	0.0	45.0	d__Bacteria; p__Firmicutes; c__Clostridia; o__Clostridiales; f__Clostridiaceae; g__Proteiniclasticum; s__unidentified_Proteiniclasticum
ASV_13521	20.0	0.0	29.0	0.0	0.0	0.0	d__Bacteria; p__Firmicutes; c__Clostridia; o__Clostridiales; f__Ruminococcaceae; g__unidentified_Ruminococcaceae; s__unidentified_Ruminococcaceae
ASV_5732	0.0	0.0	67.0	0.0	0.0	0.0	d__Bacteria; p__Firmicutes; c__Clostridia; o__Clostridiales; f__unidentified_Clostridiales; g__unidentified_Clostridiales; s__unidentified_Clostridiales
ASV_21144	0.0	0.0	0.0	11.0	0.0	0.0	d__Bacteria; p__Firmicutes; c__Clostridia; o__Clostridiales; f__Ruminococcaceae; g__Oscillospira; s__unidentified_Oscillospira
ASV_13663	0.0	0.0	0.0	3.0	0.0	39.0	d__Bacteria; p__Firmicutes; c__Bacilli; o__Bacillales; f__Thermoactinomycetaceae; g__Thermoactinomyces; s__Thermoactinomyces_sanguinis
ASV_21325	0.0	0.0	0.0	27.0	0.0	15.0	d__Bacteria; p__Actinobacteria; c__Actinobacteria; o__Actinomycetales; f__Streptosporangiaceae; g__unclassified_Streptosporangiaceae; s__unclassified_Streptosporangiaceae
ASV_12235	0.0	0.0	0.0	5.0	20.0	12.0	d__Bacteria; p__Firmicutes; c__Clostridia; o__Clostridiales; f__Ruminococcaceae; g__Oscillospira; s__unidentified_Oscillospira
ASV_2060	0.0	0.0	0.0	17.0	0.0	0.0	d__Bacteria; p__Cyanobacteria; c__Chloroplast; o__Streptophyta; f__unidentified_Streptophyta; g__unidentified_Streptophyta; s__unidentified_Streptophyta
ASV_8164	0.0	0.0	0.0	0.0	45.0	0.0	d__Bacteria; p__Firmicutes; c__Clostridia; o__Clostridiales; f__[Mogibacteriaceae]; g__Anaerovorax; s__unidentified_Anaerovorax
ASV_23920	0.0	0.0	0.0	0.0	0.0	49.0	d__Bacteria; p__Firmicutes; c__Clostridia; o__Clostridiales; f__Veillonellaceae; g__unclassified_Veillonellaceae; s__unclassified_Veillonellaceae
ASV_18252	32.0	0.0	15.0	0.0	0.0	0.0	d__Bacteria; p__Firmicutes; c__Clostridia; o__SHA-98; f__unidentified_SHA-98; g__unidentified_SHA-98; s__unidentified_SHA-98
ASV_22714	0.0	21.0	0.0	18.0	0.0	0.0	d__Bacteria; p__Firmicutes; c__Bacilli; o__Lactobacillales; f__Lactobacillaceae; g__Lactobacillus; s__unclassified_Lactobacillus
ASV_14807	0.0	0.0	65.0	0.0	0.0	0.0	d__Bacteria; p__Firmicutes; c__Clostridia; o__Clostridiales; f__unidentified_Clostridiales; g__unidentified_Clostridiales; s__unidentified_Clostridiales
ASV_1594	0.0	0.0	68.0	0.0	0.0	0.0	d__Bacteria; p__Bacteroidetes; c__Bacteroidia; o__Bacteroidales; f__S24-7; g__unidentified_S24-7; s__unidentified_S24-7
ASV_18505	0.0	0.0	9.0	0.0	0.0	4.0	d__Bacteria; p__Firmicutes; c__Clostridia; o__Clostridiales; f__Ruminococcaceae; g__unidentified_Ruminococcaceae; s__unidentified_Ruminococcaceae
ASV_23456	0.0	0.0	0.0	0.0	5.0	29.0	d__Bacteria; p__Bacteroidetes; c__Bacteroidia; o__Bacteroidales; f__unidentified_Bacteroidales; g__unidentified_Bacteroidales; s__unidentified_Bacteroidales
ASV_1227	0.0	0.0	0.0	0.0	17.0	0.0	d__Bacteria; p__Bacteroidetes; c__Flavobacteriia; o__Flavobacteriales; f__Flavobacteriaceae; g__Flavobacterium; s__Flavobacterium_frigidarium
ASV_22134	0.0	0.0	0.0	0.0	0.0	21.0	d__Bacteria; p__Proteobacteria; c__Alphaproteobacteria; o__Sphingomonadales; f__Sphingomonadaceae; g__Kaistobacter; s__unidentified_Kaistobacter
ASV_25590	0.0	0.0	0.0	0.0	21.0	0.0	d__Bacteria; p__Proteobacteria; c__Alphaproteobacteria; o__Rhizobiales; f__Hyphomicrobiaceae; g__Hyphomicrobium; s__unidentified_Hyphomicrobium
ASV_18630	0.0	0.0	0.0	0.0	40.0	0.0	d__Bacteria; p__Proteobacteria; c__Alphaproteobacteria; o__Rhodospirillales; f__Rhodospirillaceae; g__unidentified_Rhodospirillaceae; s__unidentified_Rhodospirillaceae
ASV_5827	0.0	0.0	0.0	13.0	0.0	0.0	d__Bacteria; p__Firmicutes; c__Clostridia; o__Clostridiales; f__Ruminococcaceae; g__unidentified_Ruminococcaceae; s__unidentified_Ruminococcaceae
ASV_8088	0.0	0.0	0.0	37.0	0.0	0.0	d__Bacteria; p__Firmicutes; c__Clostridia; o__Clostridiales; f__Clostridiaceae; g__Proteiniclasticum; s__unidentified_Proteiniclasticum
ASV_7258	0.0	0.0	0.0	33.0	0.0	0.0	d__Bacteria; p__Actinobacteria; c__Actinobacteria; o__Actinomycetales; f__Intrasporangiaceae; g__unidentified_Intrasporangiaceae; s__unidentified_Intrasporangiaceae
ASV_22619	0.0	0.0	0.0	18.0	17.0	0.0	d__Bacteria; p__Proteobacteria; c__Gammaproteobacteria; o__Xanthomonadales; f__Xanthomonadaceae; g__unclassified_Xanthomonadaceae; s__unclassified_Xanthomonadaceae
ASV_1292	0.0	0.0	0.0	0.0	16.0	30.0	d__Bacteria; p__Actinobacteria; c__Actinobacteria; o__Actinomycetales; f__Thermomonosporaceae; g__Actinoallomurus; s__Actinoallomurus_iriomotensis
ASV_8798	0.0	0.0	0.0	0.0	29.0	1.0	d__Bacteria; p__Firmicutes; c__Clostridia; o__Clostridiales; f__Christensenellaceae; g__unidentified_Christensenellaceae; s__unidentified_Christensenellaceae
ASV_3229	6.0	7.0	14.0	5.0	0.0	0.0	d__Bacteria; p__Firmicutes; c__Clostridia; o__Clostridiales; f__Ruminococcaceae; g__unclassified_Ruminococcaceae; s__unclassified_Ruminococcaceae
ASV_18294	9.0	0.0	0.0	0.0	0.0	0.0	d__Bacteria; p__Firmicutes; c__Clostridia; o__Clostridiales; f__Ruminococcaceae; g__unidentified_Ruminococcaceae; s__unidentified_Ruminococcaceae
ASV_5320	9.0	0.0	0.0	0.0	0.0	30.0	d__Bacteria; p__Firmicutes; c__Clostridia; o__Clostridiales; f__Veillonellaceae; g__Anaeromusa; s__unidentified_Anaeromusa
ASV_9779	14.0	3.0	10.0	0.0	0.0	0.0	d__Bacteria; p__Firmicutes; c__Clostridia; o__Clostridiales; f__unclassified_Clostridiales; g__unclassified_Clostridiales; s__unclassified_Clostridiales
ASV_18385	0.0	59.0	0.0	0.0	0.0	0.0	d__Bacteria; p__Firmicutes; c__Clostridia; o__Clostridiales; f__unclassified_Clostridiales; g__unclassified_Clostridiales; s__unclassified_Clostridiales
ASV_20778	0.0	5.0	4.0	0.0	0.0	9.0	d__Bacteria; p__Firmicutes; c__Clostridia; o__Clostridiales; f__unidentified_Clostridiales; g__unidentified_Clostridiales; s__unidentified_Clostridiales
ASV_3806	0.0	0.0	28.0	0.0	9.0	0.0	d__Bacteria; p__Firmicutes; c__Clostridia; o__Clostridiales; f__unidentified_Clostridiales; g__unidentified_Clostridiales; s__unidentified_Clostridiales
ASV_9324	0.0	0.0	7.0	0.0	20.0	0.0	d__Bacteria; p__Firmicutes; c__Clostridia; o__Clostridiales; f__Ruminococcaceae; g__Ruminococcus; s__unidentified_Ruminococcus
ASV_19109	0.0	0.0	0.0	19.0	0.0	0.0	d__Bacteria; p__Firmicutes; c__Bacilli; o__Lactobacillales; f__Lactobacillaceae; g__Lactobacillus; s__unclassified_Lactobacillus
ASV_11389	0.0	0.0	0.0	38.0	0.0	0.0	d__Bacteria; p__Firmicutes; c__Clostridia; o__Clostridiales; f__unclassified_Clostridiales; g__unclassified_Clostridiales; s__unclassified_Clostridiales
ASV_1562	0.0	0.0	0.0	27.0	0.0	0.0	d__Bacteria; p__Actinobacteria; c__Actinobacteria; o__Actinomycetales; f__Mycobacteriaceae; g__Mycobacterium; s__unidentified_Mycobacterium
ASV_9498	0.0	0.0	0.0	33.0	0.0	0.0	d__Bacteria; p__Firmicutes; c__Clostridia; o__Clostridiales; f__Ruminococcaceae; g__Ruminococcus; s__Ruminococcus_callidus
ASV_2185	0.0	0.0	0.0	4.0	0.0	0.0	d__Bacteria; p__Firmicutes; c__Clostridia; o__Clostridiales; f__unidentified_Clostridiales; g__unidentified_Clostridiales; s__unidentified_Clostridiales
ASV_23322	0.0	0.0	0.0	14.0	0.0	0.0	d__Bacteria; p__Actinobacteria; c__Coriobacteriia; o__Coriobacteriales; f__Coriobacteriaceae; g__unidentified_Coriobacteriaceae; s__unidentified_Coriobacteriaceae
ASV_21934	0.0	0.0	0.0	8.0	0.0	33.0	d__Bacteria; p__Proteobacteria; c__Betaproteobacteria; o__Burkholderiales; f__Burkholderiaceae; g__Pandoraea; s__unidentified_Pandoraea
ASV_20133	0.0	0.0	0.0	0.0	49.0	0.0	d__Bacteria; p__Chloroflexi; c__Anaerolineae; o__Caldilineales; f__Caldilineaceae; g__Caldilinea; s__unidentified_Caldilinea
ASV_1849	0.0	0.0	0.0	0.0	36.0	7.0	d__Bacteria; p__WPS-2; c__unidentified_WPS-2; o__unidentified_WPS-2; f__unidentified_WPS-2; g__unidentified_WPS-2; s__unidentified_WPS-2
ASV_14877	0.0	0.0	0.0	0.0	0.0	48.0	d__Bacteria; p__Actinobacteria; c__Thermoleophilia; o__Gaiellales; f__unidentified_Gaiellales; g__unidentified_Gaiellales; s__unidentified_Gaiellales
ASV_6663	42.0	0.0	0.0	0.0	0.0	7.0	d__Bacteria; p__Firmicutes; c__Clostridia; o__Clostridiales; f__unidentified_Clostridiales; g__unidentified_Clostridiales; s__unidentified_Clostridiales
ASV_7503	10.0	0.0	0.0	0.0	0.0	0.0	d__Bacteria; p__Firmicutes; c__Clostridia; o__Clostridiales; f__Lachnospiraceae; g__Coprococcus; s__unidentified_Coprococcus
ASV_15739	0.0	15.0	10.0	0.0	11.0	0.0	d__Bacteria; p__Firmicutes; c__Clostridia; o__Clostridiales; f__[Mogibacteriaceae]; g__unidentified_[Mogibacteriaceae]; s__unidentified_[Mogibacteriaceae]
ASV_11500	0.0	0.0	0.0	0.0	14.0	22.0	d__Bacteria; p__TM7; c__TM7-3; o__CW040; f__F16; g__unidentified_F16; s__unidentified_F16
ASV_13767	0.0	0.0	0.0	35.0	0.0	0.0	d__Bacteria; p__TM7; c__SC3; o__unidentified_SC3; f__unidentified_SC3; g__unidentified_SC3; s__unidentified_SC3
ASV_12402	0.0	0.0	0.0	12.0	29.0	0.0	d__Bacteria; p__Actinobacteria; c__Actinobacteria; o__Actinomycetales; f__Geodermatophilaceae; g__Geodermatophilus; s__unidentified_Geodermatophilus
ASV_21507	0.0	0.0	0.0	25.0	0.0	9.0	d__Bacteria; p__Actinobacteria; c__Actinobacteria; o__Actinomycetales; f__Streptosporangiaceae; g__unclassified_Streptosporangiaceae; s__unclassified_Streptosporangiaceae
ASV_1909	0.0	0.0	0.0	4.0	24.0	0.0	d__Bacteria; p__Firmicutes; c__Clostridia; o__Clostridiales; f__Christensenellaceae; g__unidentified_Christensenellaceae; s__unidentified_Christensenellaceae
ASV_25155	0.0	0.0	0.0	13.0	0.0	27.0	d__Bacteria; p__Actinobacteria; c__Thermoleophilia; o__Solirubrobacterales; f__unidentified_Solirubrobacterales; g__unidentified_Solirubrobacterales; s__unidentified_Solirubrobacterales
ASV_6016	0.0	0.0	0.0	0.0	0.0	54.0	d__Bacteria; p__Firmicutes; c__Clostridia; o__Clostridiales; f__Ruminococcaceae; g__Ruminococcus; s__unidentified_Ruminococcus
ASV_5034	0.0	0.0	16.0	0.0	10.0	3.0	d__Bacteria; p__Firmicutes; c__Clostridia; o__Clostridiales; f__Lachnospiraceae; g__Dorea; s__unidentified_Dorea
ASV_14939	0.0	0.0	64.0	0.0	0.0	0.0	d__Bacteria; p__Proteobacteria; c__Gammaproteobacteria; o__Legionellales; f__unidentified_Legionellales; g__unidentified_Legionellales; s__unidentified_Legionellales
ASV_23984	0.0	0.0	15.0	7.0	6.0	0.0	d__Bacteria; p__Firmicutes; c__Clostridia; o__Clostridiales; f__unidentified_Clostridiales; g__unidentified_Clostridiales; s__unidentified_Clostridiales
ASV_20281	0.0	0.0	0.0	0.0	0.0	16.0	d__Bacteria; p__Actinobacteria; c__Actinobacteria; o__Actinomycetales; f__Propionibacteriaceae; g__Propionibacterium; s__Propionibacterium_acnes
ASV_17452	0.0	0.0	0.0	0.0	0.0	24.0	d__Bacteria; p__Chloroflexi; c__TK17; o__mle1-48; f__unidentified_mle1-48; g__unidentified_mle1-48; s__unidentified_mle1-48
ASV_10829	0.0	0.0	0.0	0.0	26.0	0.0	d__Bacteria; p__Firmicutes; c__Bacilli; o__Bacillales; f__Bacillaceae; g__Bacillus; s__Bacillus_muralis
ASV_20206	0.0	0.0	0.0	0.0	0.0	22.0	d__Bacteria; p__TM7; c__TM7-1; o__unidentified_TM7-1; f__unidentified_TM7-1; g__unidentified_TM7-1; s__unidentified_TM7-1
ASV_7621	0.0	0.0	0.0	0.0	0.0	21.0	d__Bacteria; p__Actinobacteria; c__Actinobacteria; o__Actinomycetales; f__Geodermatophilaceae; g__unclassified_Geodermatophilaceae; s__unclassified_Geodermatophilaceae
ASV_24996	0.0	0.0	0.0	0.0	15.0	22.0	d__Bacteria; p__Acidobacteria; c__Acidobacteriia; o__Acidobacteriales; f__Koribacteraceae; g__unidentified_Koribacteraceae; s__unidentified_Koribacteraceae
ASV_22481	0.0	0.0	0.0	19.0	0.0	0.0	d__Bacteria; p__Proteobacteria; c__Betaproteobacteria; o__MND1; f__unidentified_MND1; g__unidentified_MND1; s__unidentified_MND1
ASV_7528	0.0	0.0	0.0	11.0	19.0	0.0	d__Bacteria; p__Firmicutes; c__Clostridia; o__Clostridiales; f__Lachnospiraceae; g__[Ruminococcus]; s__[Ruminococcus]_gnavus
ASV_23091	0.0	0.0	0.0	29.0	0.0	0.0	d__Bacteria; p__Firmicutes; c__Clostridia; o__Clostridiales; f__Ruminococcaceae; g__Ruminococcus; s__unclassified_Ruminococcus
ASV_14440	0.0	0.0	0.0	6.0	14.0	14.0	d__Bacteria; p__Proteobacteria; c__Alphaproteobacteria; o__Rhodospirillales; f__Rhodospirillaceae; g__unidentified_Rhodospirillaceae; s__unidentified_Rhodospirillaceae
ASV_25995	0.0	0.0	0.0	0.0	48.0	0.0	d__Bacteria; p__Actinobacteria; c__Actinobacteria; o__Actinomycetales; f__Mycobacteriaceae; g__Mycobacterium; s__Mycobacterium_vaccae
ASV_5995	0.0	14.0	0.0	0.0	0.0	14.0	d__Bacteria; p__Firmicutes; c__Clostridia; o__Clostridiales; f__unclassified_Clostridiales; g__unclassified_Clostridiales; s__unclassified_Clostridiales
ASV_9567	0.0	0.0	0.0	9.0	0.0	0.0	d__Bacteria; p__Chloroflexi; c__Thermomicrobia; o__unidentified_Thermomicrobia; f__unidentified_Thermomicrobia; g__unidentified_Thermomicrobia; s__unidentified_Thermomicrobia
ASV_17132	0.0	0.0	0.0	0.0	0.0	30.0	d__Bacteria; p__Bacteroidetes; c__Sphingobacteriia; o__Sphingobacteriales; f__Sphingobacteriaceae; g__unidentified_Sphingobacteriaceae; s__unidentified_Sphingobacteriaceae
ASV_1829	0.0	0.0	0.0	0.0	0.0	28.0	d__Bacteria; p__Actinobacteria; c__Thermoleophilia; o__Gaiellales; f__Gaiellaceae; g__unidentified_Gaiellaceae; s__unidentified_Gaiellaceae
ASV_18273	0.0	0.0	0.0	0.0	8.0	29.0	d__Bacteria; p__Actinobacteria; c__Thermoleophilia; o__Gaiellales; f__Gaiellaceae; g__unidentified_Gaiellaceae; s__unidentified_Gaiellaceae
ASV_19911	0.0	0.0	0.0	28.0	0.0	0.0	d__Bacteria; p__Firmicutes; c__Clostridia; o__Clostridiales; f__Peptostreptococcaceae; g__unclassified_Peptostreptococcaceae; s__unclassified_Peptostreptococcaceae
ASV_23648	0.0	0.0	0.0	21.0	15.0	0.0	d__Bacteria; p__Actinobacteria; c__Actinobacteria; o__Actinomycetales; f__Intrasporangiaceae; g__Terracoccus; s__unidentified_Terracoccus
ASV_19932	0.0	0.0	0.0	14.0	9.0	3.0	d__Bacteria; p__Firmicutes; c__Clostridia; o__Clostridiales; f__Ruminococcaceae; g__unidentified_Ruminococcaceae; s__unidentified_Ruminococcaceae
ASV_13842	0.0	0.0	0.0	14.0	21.0	0.0	d__Bacteria; p__Actinobacteria; c__Thermoleophilia; o__Gaiellales; f__Gaiellaceae; g__unidentified_Gaiellaceae; s__unidentified_Gaiellaceae
ASV_4131	0.0	0.0	0.0	0.0	10.0	31.0	d__Bacteria; p__Firmicutes; c__Bacilli; o__Lactobacillales; f__Leuconostocaceae; g__Weissella; s__unclassified_Weissella
ASV_13137	0.0	0.0	0.0	0.0	45.0	0.0	d__Bacteria; p__Actinobacteria; c__Thermoleophilia; o__Gaiellales; f__Gaiellaceae; g__unidentified_Gaiellaceae; s__unidentified_Gaiellaceae
ASV_11037	0.0	0.0	0.0	0.0	0.0	32.0	d__Bacteria; p__Acidobacteria; c__Acidobacteriia; o__Acidobacteriales; f__Koribacteraceae; g__Candidatus_Koribacter; s__unidentified_Candidatus_Koribacter
ASV_1804	25.0	0.0	0.0	17.0	0.0	0.0	d__Bacteria; p__Bacteroidetes; c__Bacteroidia; o__Bacteroidales; f__unidentified_Bacteroidales; g__unidentified_Bacteroidales; s__unidentified_Bacteroidales
ASV_1416	23.0	0.0	0.0	0.0	0.0	6.0	d__Bacteria; p__Bacteroidetes; c__Bacteroidia; o__Bacteroidales; f__S24-7; g__unidentified_S24-7; s__unidentified_S24-7
ASV_26310	24.0	0.0	0.0	0.0	0.0	0.0	d__Bacteria; p__Proteobacteria; c__Alphaproteobacteria; o__Rhizobiales; f__unclassified_Rhizobiales; g__unclassified_Rhizobiales; s__unclassified_Rhizobiales
ASV_24690	9.0	10.0	0.0	0.0	0.0	0.0	d__Bacteria; p__Firmicutes; c__Clostridia; o__Clostridiales; f__unclassified_Clostridiales; g__unclassified_Clostridiales; s__unclassified_Clostridiales
ASV_14963	0.0	0.0	2.0	0.0	17.0	15.0	d__Bacteria; p__Spirochaetes; c__Spirochaetes; o__Spirochaetales; f__Spirochaetaceae; g__Treponema; s__unidentified_Treponema
ASV_21826	0.0	0.0	0.0	0.0	16.0	9.0	d__Bacteria; p__Proteobacteria; c__Deltaproteobacteria; o__GMD14H09; f__unidentified_GMD14H09; g__unidentified_GMD14H09; s__unidentified_GMD14H09
ASV_1704	0.0	0.0	0.0	0.0	0.0	10.0	d__Bacteria; p__Proteobacteria; c__Betaproteobacteria; o__Burkholderiales; f__Alcaligenaceae; g__Sutterella; s__unidentified_Sutterella
ASV_12818	0.0	0.0	0.0	0.0	40.0	0.0	d__Bacteria; p__Proteobacteria; c__Alphaproteobacteria; o__Rhizobiales; f__Methylocystaceae; g__unidentified_Methylocystaceae; s__unidentified_Methylocystaceae
ASV_3233	0.0	0.0	0.0	4.0	18.0	16.0	d__Bacteria; p__Verrucomicrobia; c__Verruco-5; o__WCHB1-41; f__RFP12; g__unidentified_RFP12; s__unidentified_RFP12
ASV_13233	0.0	0.0	0.0	14.0	15.0	0.0	d__Bacteria; p__Bacteroidetes; c__Bacteroidia; o__Bacteroidales; f__Porphyromonadaceae; g__Paludibacter; s__unidentified_Paludibacter
ASV_18833	0.0	0.0	0.0	0.0	43.0	0.0	d__Bacteria; p__Actinobacteria; c__Acidimicrobiia; o__Acidimicrobiales; f__EB1017; g__unidentified_EB1017; s__unidentified_EB1017
ASV_13753	0.0	0.0	0.0	0.0	45.0	0.0	d__Bacteria; p__Firmicutes; c__Clostridia; o__Clostridiales; f__[Mogibacteriaceae]; g__Anaerovorax; s__unidentified_Anaerovorax
ASV_22215	0.0	0.0	0.0	0.0	42.0	0.0	d__Bacteria; p__Firmicutes; c__Clostridia; o__Clostridiales; f__Clostridiaceae; g__Clostridium; s__unidentified_Clostridium
ASV_16142	0.0	0.0	0.0	0.0	39.0	0.0	d__Bacteria; p__Firmicutes; c__Clostridia; o__Clostridiales; f__Ruminococcaceae; g__unidentified_Ruminococcaceae; s__unidentified_Ruminococcaceae
ASV_16797	0.0	0.0	0.0	0.0	0.0	9.0	d__Bacteria; p__Spirochaetes; c__Spirochaetes; o__Spirochaetales; f__Spirochaetaceae; g__Treponema; s__unidentified_Treponema
ASV_3275	0.0	0.0	0.0	0.0	0.0	47.0	d__Bacteria; p__unclassified_Bacteria; c__unclassified_Bacteria; o__unclassified_Bacteria; f__unclassified_Bacteria; g__unclassified_Bacteria; s__unclassified_Bacteria
ASV_15270	0.0	0.0	0.0	0.0	0.0	38.0	d__Bacteria; p__Bacteroidetes; c__Flavobacteriia; o__Flavobacteriales; f__Flavobacteriaceae; g__Flavobacterium; s__unidentified_Flavobacterium
ASV_10043	0.0	0.0	0.0	0.0	0.0	50.0	d__Bacteria; p__Proteobacteria; c__Alphaproteobacteria; o__Rhodospirillales; f__Acetobacteraceae; g__unidentified_Acetobacteraceae; s__unidentified_Acetobacteraceae
ASV_13095	29.0	17.0	0.0	0.0	0.0	0.0	d__Bacteria; p__Firmicutes; c__Clostridia; o__Clostridiales; f__Ruminococcaceae; g__unidentified_Ruminococcaceae; s__unidentified_Ruminococcaceae
ASV_19928	0.0	34.0	11.0	0.0	0.0	0.0	d__Bacteria; p__Firmicutes; c__Clostridia; o__Clostridiales; f__unidentified_Clostridiales; g__unidentified_Clostridiales; s__unidentified_Clostridiales
ASV_5449	0.0	0.0	0.0	0.0	0.0	18.0	d__Bacteria; p__Firmicutes; c__Bacilli; o__Bacillales; f__Sporolactobacillaceae; g__Pullulanibacillus; s__unidentified_Pullulanibacillus
ASV_17241	0.0	0.0	0.0	12.0	0.0	0.0	d__Bacteria; p__Acidobacteria; c__Acidobacteria-6; o__iii1-15; f__mb2424; g__unidentified_mb2424; s__unidentified_mb2424
ASV_18797	0.0	0.0	0.0	18.0	0.0	11.0	d__Bacteria; p__Chloroflexi; c__Thermomicrobia; o__JG30-KF-CM45; f__unidentified_JG30-KF-CM45; g__unidentified_JG30-KF-CM45; s__unidentified_JG30-KF-CM45
ASV_25095	0.0	0.0	0.0	27.0	0.0	0.0	d__Bacteria; p__Actinobacteria; c__Actinobacteria; o__Actinomycetales; f__Micromonosporaceae; g__unclassified_Micromonosporaceae; s__unclassified_Micromonosporaceae
ASV_25846	0.0	0.0	0.0	16.0	30.0	0.0	d__Bacteria; p__Proteobacteria; c__Gammaproteobacteria; o__Pseudomonadales; f__Moraxellaceae; g__Acinetobacter; s__unidentified_Acinetobacter
ASV_25115	0.0	0.0	0.0	28.0	0.0	0.0	d__Bacteria; p__Firmicutes; c__Clostridia; o__Clostridiales; f__[Acidaminobacteraceae]; g__Fusibacter; s__unidentified_Fusibacter
ASV_5537	0.0	0.0	0.0	14.0	0.0	16.0	d__Bacteria; p__Acidobacteria; c__Acidobacteriia; o__Acidobacteriales; f__Acidobacteriaceae; g__Edaphobacter; s__unidentified_Edaphobacter
ASV_11056	0.0	0.0	0.0	0.0	3.0	0.0	d__Bacteria; p__Firmicutes; c__Clostridia; o__Clostridiales; f__Lachnospiraceae; g__Coprococcus; s__unidentified_Coprococcus
ASV_5513	0.0	0.0	0.0	0.0	41.0	0.0	d__Bacteria; p__Actinobacteria; c__Actinobacteria; o__Actinomycetales; f__Pseudonocardiaceae; g__Pseudonocardia; s__unclassified_Pseudonocardia
ASV_18487	0.0	0.0	0.0	0.0	44.0	0.0	d__Bacteria; p__Actinobacteria; c__Actinobacteria; o__Actinomycetales; f__Pseudonocardiaceae; g__Pseudonocardia; s__unclassified_Pseudonocardia
ASV_16613	0.0	0.0	0.0	0.0	24.0	5.0	d__Bacteria; p__Proteobacteria; c__Alphaproteobacteria; o__Rhizobiales; f__Methylobacteriaceae; g__unclassified_Methylobacteriaceae; s__unclassified_Methylobacteriaceae
ASV_1229	0.0	0.0	0.0	0.0	48.0	0.0	d__Bacteria; p__Actinobacteria; c__Acidimicrobiia; o__Acidimicrobiales; f__EB1017; g__unidentified_EB1017; s__unidentified_EB1017
ASV_796	0.0	0.0	0.0	0.0	0.0	41.0	d__Bacteria; p__Actinobacteria; c__Thermoleophilia; o__Solirubrobacterales; f__Patulibacteraceae; g__unidentified_Patulibacteraceae; s__unidentified_Patulibacteraceae
ASV_11999	0.0	0.0	0.0	0.0	0.0	36.0	d__Bacteria; p__Firmicutes; c__Clostridia; o__Clostridiales; f__Ruminococcaceae; g__unidentified_Ruminococcaceae; s__unidentified_Ruminococcaceae
ASV_17334	0.0	0.0	0.0	0.0	0.0	44.0	d__Bacteria; p__Actinobacteria; c__Thermoleophilia; o__Solirubrobacterales; f__unidentified_Solirubrobacterales; g__unidentified_Solirubrobacterales; s__unidentified_Solirubrobacterales
ASV_5635	13.0	39.0	0.0	0.0	0.0	0.0	d__Bacteria; p__Firmicutes; c__Clostridia; o__Clostridiales; f__Ruminococcaceae; g__unidentified_Ruminococcaceae; s__unidentified_Ruminococcaceae
ASV_16956	6.0	0.0	19.0	5.0	0.0	0.0	d__Bacteria; p__Firmicutes; c__Clostridia; o__Clostridiales; f__Ruminococcaceae; g__Oscillospira; s__unidentified_Oscillospira
ASV_19449	0.0	31.0	9.0	3.0	0.0	0.0	d__Bacteria; p__Firmicutes; c__Clostridia; o__Clostridiales; f__Ruminococcaceae; g__unidentified_Ruminococcaceae; s__unidentified_Ruminococcaceae
ASV_4444	0.0	0.0	38.0	0.0	0.0	0.0	d__Bacteria; p__Firmicutes; c__Clostridia; o__Clostridiales; f__Lachnospiraceae; g__unclassified_Lachnospiraceae; s__unclassified_Lachnospiraceae
ASV_20710	0.0	0.0	0.0	2.0	0.0	0.0	d__Bacteria; p__Firmicutes; c__Clostridia; o__Clostridiales; f__Ruminococcaceae; g__unidentified_Ruminococcaceae; s__unidentified_Ruminococcaceae
ASV_15816	0.0	0.0	0.0	8.0	0.0	0.0	d__Bacteria; p__Actinobacteria; c__Actinobacteria; o__Actinomycetales; f__Micromonosporaceae; g__unclassified_Micromonosporaceae; s__unclassified_Micromonosporaceae
ASV_6950	0.0	0.0	0.0	20.0	0.0	0.0	d__Bacteria; p__Actinobacteria; c__Coriobacteriia; o__Coriobacteriales; f__Coriobacteriaceae; g__Adlercreutzia; s__unidentified_Adlercreutzia
ASV_23708	0.0	0.0	0.0	0.0	0.0	32.0	d__Bacteria; p__Proteobacteria; c__Betaproteobacteria; o__Burkholderiales; f__Comamonadaceae; g__unclassified_Comamonadaceae; s__unclassified_Comamonadaceae
ASV_10246	0.0	0.0	0.0	32.0	0.0	0.0	d__Bacteria; p__Firmicutes; c__Bacilli; o__Lactobacillales; f__Lactobacillaceae; g__Lactobacillus; s__unidentified_Lactobacillus
ASV_7488	0.0	0.0	0.0	7.0	5.0	25.0	d__Bacteria; p__Firmicutes; c__Clostridia; o__Clostridiales; f__Veillonellaceae; g__Anaerovibrio; s__unidentified_Anaerovibrio
ASV_22130	0.0	0.0	0.0	10.0	32.0	0.0	d__Bacteria; p__Proteobacteria; c__Alphaproteobacteria; o__Ellin329; f__unidentified_Ellin329; g__unidentified_Ellin329; s__unidentified_Ellin329
ASV_12954	0.0	0.0	0.0	0.0	38.0	0.0	d__Bacteria; p__Chloroflexi; c__Thermomicrobia; o__unidentified_Thermomicrobia; f__unidentified_Thermomicrobia; g__unidentified_Thermomicrobia; s__unidentified_Thermomicrobia
ASV_19788	0.0	0.0	0.0	0.0	48.0	0.0	d__Bacteria; p__Firmicutes; c__Bacilli; o__Bacillales; f__Paenibacillaceae; g__Cohnella; s__unidentified_Cohnella
ASV_21665	0.0	0.0	0.0	0.0	46.0	0.0	d__Bacteria; p__TM7; c__TM7-1; o__unidentified_TM7-1; f__unidentified_TM7-1; g__unidentified_TM7-1; s__unidentified_TM7-1
ASV_14077	0.0	0.0	0.0	0.0	4.0	36.0	d__Bacteria; p__Bacteroidetes; c__Bacteroidia; o__Bacteroidales; f__Prevotellaceae; g__Prevotella; s__Prevotella_copri
ASV_12110	0.0	0.0	0.0	0.0	31.0	16.0	d__Bacteria; p__Proteobacteria; c__Alphaproteobacteria; o__Rhizobiales; f__Beijerinckiaceae; g__Beijerinckia; s__unidentified_Beijerinckia
ASV_3609	0.0	0.0	0.0	0.0	20.0	18.0	d__Bacteria; p__Actinobacteria; c__Thermoleophilia; o__Solirubrobacterales; f__unidentified_Solirubrobacterales; g__unidentified_Solirubrobacterales; s__unidentified_Solirubrobacterales
ASV_25778	0.0	0.0	0.0	0.0	0.0	51.0	d__Bacteria; p__Bacteroidetes; c__Flavobacteriia; o__Flavobacteriales; f__Flavobacteriaceae; g__Flavobacterium; s__Flavobacterium_frigidarium
ASV_6755	0.0	0.0	0.0	0.0	0.0	38.0	d__Bacteria; p__Proteobacteria; c__Betaproteobacteria; o__unclassified_Betaproteobacteria; f__unclassified_Betaproteobacteria; g__unclassified_Betaproteobacteria; s__unclassified_Betaproteobacteria
ASV_5052	0.0	0.0	0.0	0.0	0.0	38.0	d__Bacteria; p__Cyanobacteria; c__Chloroplast; o__Streptophyta; f__unidentified_Streptophyta; g__unidentified_Streptophyta; s__unidentified_Streptophyta
ASV_7997	25.0	0.0	0.0	0.0	0.0	6.0	d__Bacteria; p__Firmicutes; c__Erysipelotrichi; o__Erysipelotrichales; f__Erysipelotrichaceae; g__unidentified_Erysipelotrichaceae; s__unidentified_Erysipelotrichaceae
ASV_16584	33.0	0.0	0.0	0.0	0.0	0.0	d__Bacteria; p__Bacteroidetes; c__Bacteroidia; o__Bacteroidales; f__Rikenellaceae; g__Alistipes; s__Alistipes_finegoldii
ASV_20981	18.0	0.0	7.0	0.0	0.0	0.0	d__Bacteria; p__Proteobacteria; c__Gammaproteobacteria; o__Legionellales; f__unidentified_Legionellales; g__unidentified_Legionellales; s__unidentified_Legionellales
ASV_14736	39.0	0.0	0.0	0.0	0.0	0.0	d__Bacteria; p__Firmicutes; c__Clostridia; o__Clostridiales; f__Ruminococcaceae; g__Oscillospira; s__unidentified_Oscillospira
ASV_1775	1.0	4.0	5.0	3.0	7.0	0.0	d__Bacteria; p__Proteobacteria; c__Betaproteobacteria; o__Burkholderiales; f__Comamonadaceae; g__Pelomonas; s__Pelomonas_puraquae
ASV_23867	0.0	9.0	0.0	0.0	0.0	0.0	d__Bacteria; p__Firmicutes; c__Clostridia; o__Clostridiales; f__Ruminococcaceae; g__Oscillospira; s__unidentified_Oscillospira
ASV_24024	0.0	0.0	5.0	3.0	0.0	28.0	d__Bacteria; p__unclassified_Bacteria; c__unclassified_Bacteria; o__unclassified_Bacteria; f__unclassified_Bacteria; g__unclassified_Bacteria; s__unclassified_Bacteria
ASV_8562	0.0	0.0	2.0	0.0	0.0	33.0	d__Bacteria; p__Proteobacteria; c__Gammaproteobacteria; o__Xanthomonadales; f__Xanthomonadaceae; g__unidentified_Xanthomonadaceae; s__unidentified_Xanthomonadaceae
ASV_7842	0.0	0.0	0.0	10.0	0.0	0.0	d__Bacteria; p__Cyanobacteria; c__4C0d-2; o__YS2; f__unidentified_YS2; g__unidentified_YS2; s__unidentified_YS2
ASV_20361	0.0	0.0	0.0	10.0	0.0	18.0	d__Bacteria; p__Proteobacteria; c__Betaproteobacteria; o__Burkholderiales; f__Burkholderiaceae; g__Burkholderia; s__unclassified_Burkholderia
ASV_6477	0.0	0.0	0.0	8.0	0.0	0.0	d__Bacteria; p__Proteobacteria; c__Betaproteobacteria; o__Burkholderiales; f__Burkholderiaceae; g__Burkholderia; s__Burkholderia_bryophila
ASV_12919	0.0	0.0	0.0	29.0	0.0	0.0	d__Bacteria; p__Firmicutes; c__Clostridia; o__Clostridiales; f__[Mogibacteriaceae]; g__unidentified_[Mogibacteriaceae]; s__unidentified_[Mogibacteriaceae]
ASV_1721	0.0	0.0	0.0	11.0	0.0	21.0	d__Bacteria; p__Proteobacteria; c__Gammaproteobacteria; o__Pseudomonadales; f__Moraxellaceae; g__Acinetobacter; s__Acinetobacter_lwoffii
ASV_25872	0.0	0.0	0.0	13.0	0.0	20.0	d__Bacteria; p__Firmicutes; c__Clostridia; o__Clostridiales; f__unclassified_Clostridiales; g__unclassified_Clostridiales; s__unclassified_Clostridiales
ASV_7635	0.0	0.0	0.0	0.0	47.0	0.0	d__Bacteria; p__Proteobacteria; c__Alphaproteobacteria; o__Rhizobiales; f__Hyphomicrobiaceae; g__Rhodoplanes; s__unidentified_Rhodoplanes
ASV_23020	16.0	8.0	0.0	0.0	0.0	0.0	d__Bacteria; p__Cyanobacteria; c__4C0d-2; o__YS2; f__unidentified_YS2; g__unidentified_YS2; s__unidentified_YS2
ASV_15754	0.0	8.0	0.0	0.0	3.0	18.0	d__Bacteria; p__Firmicutes; c__Clostridia; o__Clostridiales; f__unidentified_Clostridiales; g__unidentified_Clostridiales; s__unidentified_Clostridiales
ASV_9393	0.0	0.0	0.0	10.0	10.0	0.0	d__Bacteria; p__Firmicutes; c__Clostridia; o__Clostridiales; f__Ruminococcaceae; g__unidentified_Ruminococcaceae; s__unidentified_Ruminococcaceae
ASV_8413	0.0	0.0	0.0	9.0	0.0	0.0	d__Bacteria; p__Firmicutes; c__Bacilli; o__Turicibacterales; f__Turicibacteraceae; g__Turicibacter; s__unidentified_Turicibacter
ASV_15717	0.0	0.0	0.0	0.0	0.0	25.0	d__Bacteria; p__Gemmatimonadetes; c__Gemm-3; o__unidentified_Gemm-3; f__unidentified_Gemm-3; g__unidentified_Gemm-3; s__unidentified_Gemm-3
ASV_23251	0.0	0.0	0.0	5.0	0.0	6.0	d__Bacteria; p__Firmicutes; c__Clostridia; o__Clostridiales; f__unclassified_Clostridiales; g__unclassified_Clostridiales; s__unclassified_Clostridiales
ASV_4282	0.0	0.0	0.0	17.0	0.0	15.0	d__Bacteria; p__Actinobacteria; c__Thermoleophilia; o__Gaiellales; f__Gaiellaceae; g__unidentified_Gaiellaceae; s__unidentified_Gaiellaceae
ASV_21228	0.0	0.0	0.0	25.0	0.0	0.0	d__Bacteria; p__Proteobacteria; c__Betaproteobacteria; o__Burkholderiales; f__Comamonadaceae; g__unclassified_Comamonadaceae; s__unclassified_Comamonadaceae
ASV_1297	0.0	0.0	0.0	15.0	4.0	0.0	d__Bacteria; p__Tenericutes; c__Mollicutes; o__RF39; f__unidentified_RF39; g__unidentified_RF39; s__unidentified_RF39
ASV_6430	0.0	0.0	0.0	0.0	43.0	0.0	d__Bacteria; p__Chloroflexi; c__Anaerolineae; o__SBR1031; f__A4b; g__unidentified_A4b; s__unidentified_A4b
ASV_13974	0.0	0.0	0.0	0.0	48.0	0.0	d__Bacteria; p__Actinobacteria; c__Actinobacteria; o__Actinomycetales; f__Geodermatophilaceae; g__unclassified_Geodermatophilaceae; s__unclassified_Geodermatophilaceae
ASV_20736	0.0	0.0	0.0	0.0	42.0	0.0	d__Bacteria; p__Actinobacteria; c__Actinobacteria; o__Actinomycetales; f__Nocardioidaceae; g__Nocardioides; s__unidentified_Nocardioides
ASV_19035	0.0	0.0	0.0	0.0	37.0	0.0	d__Bacteria; p__Firmicutes; c__Clostridia; o__Clostridiales; f__Peptostreptococcaceae; g__Tepidibacter; s__unidentified_Tepidibacter
ASV_19925	0.0	0.0	0.0	0.0	0.0	35.0	d__Bacteria; p__Chloroflexi; c__Ellin6529; o__unidentified_Ellin6529; f__unidentified_Ellin6529; g__unidentified_Ellin6529; s__unidentified_Ellin6529
ASV_16401	0.0	0.0	0.0	0.0	0.0	15.0	d__Bacteria; p__Firmicutes; c__Clostridia; o__Clostridiales; f__Ruminococcaceae; g__Oscillospira; s__unidentified_Oscillospira
ASV_11256	0.0	10.0	0.0	0.0	0.0	18.0	d__Bacteria; p__Firmicutes; c__Clostridia; o__Clostridiales; f__Christensenellaceae; g__unidentified_Christensenellaceae; s__unidentified_Christensenellaceae
ASV_21277	0.0	0.0	0.0	2.0	0.0	0.0	d__Bacteria; p__Cyanobacteria; c__4C0d-2; o__YS2; f__unidentified_YS2; g__unidentified_YS2; s__unidentified_YS2
ASV_10485	0.0	0.0	0.0	0.0	0.0	17.0	d__Bacteria; p__Firmicutes; c__Clostridia; o__Clostridiales; f__Ruminococcaceae; g__unidentified_Ruminococcaceae; s__unidentified_Ruminococcaceae
ASV_327	0.0	0.0	0.0	13.0	0.0	17.0	d__Bacteria; p__Actinobacteria; c__Actinobacteria; o__Actinomycetales; f__Frankiaceae; g__unidentified_Frankiaceae; s__unidentified_Frankiaceae
ASV_16420	0.0	0.0	0.0	16.0	0.0	19.0	d__Bacteria; p__Firmicutes; c__Clostridia; o__Clostridiales; f__unidentified_Clostridiales; g__unidentified_Clostridiales; s__unidentified_Clostridiales
ASV_2923	0.0	0.0	0.0	0.0	38.0	0.0	d__Bacteria; p__Firmicutes; c__Bacilli; o__Bacillales; f__Planococcaceae; g__unclassified_Planococcaceae; s__unclassified_Planococcaceae
ASV_156	0.0	0.0	0.0	0.0	20.0	0.0	d__Bacteria; p__Bacteroidetes; c__Bacteroidia; o__Bacteroidales; f__S24-7; g__unidentified_S24-7; s__unidentified_S24-7
ASV_23480	0.0	0.0	0.0	0.0	43.0	0.0	d__Bacteria; p__Proteobacteria; c__Gammaproteobacteria; o__Xanthomonadales; f__Xanthomonadaceae; g__unclassified_Xanthomonadaceae; s__unclassified_Xanthomonadaceae
ASV_26352	0.0	0.0	0.0	0.0	38.0	0.0	d__Bacteria; p__Proteobacteria; c__Betaproteobacteria; o__Burkholderiales; f__Comamonadaceae; g__unclassified_Comamonadaceae; s__unclassified_Comamonadaceae
ASV_9612	0.0	0.0	0.0	0.0	0.0	40.0	d__Bacteria; p__Actinobacteria; c__Actinobacteria; o__Micrococcales; f__unidentified_Micrococcales; g__unidentified_Micrococcales; s__unidentified_Micrococcales
ASV_16746	0.0	0.0	0.0	0.0	0.0	40.0	d__Bacteria; p__TM7; c__TM7-3; o__unidentified_TM7-3; f__unidentified_TM7-3; g__unidentified_TM7-3; s__unidentified_TM7-3
ASV_10300	0.0	0.0	0.0	0.0	0.0	36.0	d__Bacteria; p__Actinobacteria; c__Actinobacteria; o__Actinomycetales; f__Thermomonosporaceae; g__Actinoallomurus; s__unclassified_Actinoallomurus
ASV_20050	0.0	0.0	0.0	0.0	0.0	44.0	d__Bacteria; p__Proteobacteria; c__Betaproteobacteria; o__Ellin6067; f__unidentified_Ellin6067; g__unidentified_Ellin6067; s__unidentified_Ellin6067
ASV_6785	6.0	13.0	0.0	0.0	0.0	0.0	d__Bacteria; p__Firmicutes; c__Clostridia; o__Clostridiales; f__Christensenellaceae; g__unidentified_Christensenellaceae; s__unidentified_Christensenellaceae
ASV_9481	17.0	0.0	31.0	0.0	0.0	0.0	d__Bacteria; p__Planctomycetes; c__Planctomycetia; o__Gemmatales; f__Isosphaeraceae; g__unidentified_Isosphaeraceae; s__unidentified_Isosphaeraceae
ASV_3669	21.0	0.0	0.0	0.0	0.0	0.0	d__Bacteria; p__Bacteroidetes; c__Bacteroidia; o__Bacteroidales; f__S24-7; g__unidentified_S24-7; s__unidentified_S24-7
ASV_9357	13.0	0.0	0.0	0.0	0.0	0.0	d__Bacteria; p__Tenericutes; c__Mollicutes; o__RF39; f__unidentified_RF39; g__unidentified_RF39; s__unidentified_RF39
ASV_23297	0.0	4.0	0.0	8.0	0.0	0.0	d__Bacteria; p__Firmicutes; c__Erysipelotrichi; o__Erysipelotrichales; f__Erysipelotrichaceae; g__Allobaculum; s__unidentified_Allobaculum
ASV_22474	0.0	11.0	0.0	0.0	0.0	0.0	d__Bacteria; p__Firmicutes; c__Clostridia; o__Clostridiales; f__Lachnospiraceae; g__unidentified_Lachnospiraceae; s__unidentified_Lachnospiraceae
ASV_697	0.0	15.0	0.0	0.0	6.0	17.0	d__Bacteria; p__Firmicutes; c__Clostridia; o__Clostridiales; f__Veillonellaceae; g__Megasphaera; s__unidentified_Megasphaera
ASV_13297	0.0	0.0	21.0	0.0	0.0	0.0	d__Bacteria; p__Proteobacteria; c__Gammaproteobacteria; o__Legionellales; f__unidentified_Legionellales; g__unidentified_Legionellales; s__unidentified_Legionellales
ASV_9954	0.0	0.0	0.0	12.0	0.0	6.0	d__Bacteria; p__Proteobacteria; c__Alphaproteobacteria; o__Caulobacterales; f__Caulobacteraceae; g__Brevundimonas; s__unclassified_Brevundimonas
ASV_1590	0.0	0.0	0.0	0.0	0.0	25.0	d__Bacteria; p__Firmicutes; c__Clostridia; o__Clostridiales; f__Ruminococcaceae; g__unidentified_Ruminococcaceae; s__unidentified_Ruminococcaceae
ASV_2510	0.0	0.0	0.0	0.0	33.0	0.0	d__Bacteria; p__Actinobacteria; c__Thermoleophilia; o__Gaiellales; f__Gaiellaceae; g__unidentified_Gaiellaceae; s__unidentified_Gaiellaceae
ASV_25558	0.0	0.0	0.0	10.0	25.0	0.0	d__Bacteria; p__Proteobacteria; c__Alphaproteobacteria; o__Rhodospirillales; f__Acetobacteraceae; g__unidentified_Acetobacteraceae; s__unidentified_Acetobacteraceae
ASV_827	0.0	0.0	0.0	12.0	0.0	29.0	d__Bacteria; p__Proteobacteria; c__Alphaproteobacteria; o__Ellin329; f__unidentified_Ellin329; g__unidentified_Ellin329; s__unidentified_Ellin329
ASV_16894	0.0	0.0	0.0	0.0	17.0	20.0	d__Bacteria; p__Firmicutes; c__Bacilli; o__Bacillales; f__Bacillaceae; g__Bacillus; s__unidentified_Bacillus
ASV_13154	0.0	0.0	0.0	0.0	39.0	0.0	d__Bacteria; p__unidentified_Bacteria; c__unidentified_Bacteria; o__unidentified_Bacteria; f__unidentified_Bacteria; g__unidentified_Bacteria; s__unidentified_Bacteria
ASV_17356	0.0	0.0	0.0	0.0	43.0	0.0	d__Bacteria; p__TM7; c__TM7-3; o__EW055; f__unidentified_EW055; g__unidentified_EW055; s__unidentified_EW055
ASV_6040	0.0	0.0	0.0	0.0	40.0	0.0	d__Bacteria; p__Proteobacteria; c__Gammaproteobacteria; o__Pseudomonadales; f__Moraxellaceae; g__Psychrobacter; s__Psychrobacter_marincola
ASV_16131	0.0	0.0	0.0	0.0	0.0	32.0	d__Bacteria; p__Firmicutes; c__Bacilli; o__Bacillales; f__unclassified_Bacillales; g__unclassified_Bacillales; s__unclassified_Bacillales
ASV_11232	0.0	0.0	0.0	0.0	0.0	22.0	d__Bacteria; p__Firmicutes; c__Clostridia; o__Clostridiales; f__Lachnospiraceae; g__unidentified_Lachnospiraceae; s__unidentified_Lachnospiraceae
ASV_18337	0.0	0.0	0.0	0.0	0.0	37.0	d__Bacteria; p__Actinobacteria; c__Actinobacteria; o__Actinomycetales; f__Actinospicaceae; g__unidentified_Actinospicaceae; s__unidentified_Actinospicaceae
ASV_3599	0.0	0.0	0.0	0.0	0.0	37.0	d__Bacteria; p__Firmicutes; c__Clostridia; o__Clostridiales; f__Ruminococcaceae; g__unidentified_Ruminococcaceae; s__unidentified_Ruminococcaceae
ASV_11047	0.0	0.0	0.0	0.0	0.0	40.0	d__Bacteria; p__Actinobacteria; c__Thermoleophilia; o__Solirubrobacterales; f__unidentified_Solirubrobacterales; g__unidentified_Solirubrobacterales; s__unidentified_Solirubrobacterales
ASV_15587	0.0	0.0	0.0	0.0	0.0	37.0	d__Bacteria; p__Actinobacteria; c__Thermoleophilia; o__Gaiellales; f__Gaiellaceae; g__unidentified_Gaiellaceae; s__unidentified_Gaiellaceae
ASV_21152	0.0	0.0	0.0	0.0	0.0	33.0	d__Bacteria; p__Acidobacteria; c__Acidobacteriia; o__Acidobacteriales; f__Acidobacteriaceae; g__unidentified_Acidobacteriaceae; s__unidentified_Acidobacteriaceae
ASV_6627	8.0	0.0	0.0	0.0	0.0	0.0	d__Bacteria; p__Firmicutes; c__Clostridia; o__Clostridiales; f__Lachnospiraceae; g__unidentified_Lachnospiraceae; s__unidentified_Lachnospiraceae
ASV_18617	0.0	0.0	0.0	0.0	0.0	36.0	d__Bacteria; p__Chloroflexi; c__Ellin6529; o__unidentified_Ellin6529; f__unidentified_Ellin6529; g__unidentified_Ellin6529; s__unidentified_Ellin6529
ASV_25152	0.0	0.0	0.0	0.0	21.0	0.0	d__Bacteria; p__Proteobacteria; c__Alphaproteobacteria; o__Sphingomonadales; f__Sphingomonadaceae; g__Kaistobacter; s__unidentified_Kaistobacter
ASV_2458	0.0	0.0	0.0	0.0	0.0	9.0	d__Bacteria; p__Firmicutes; c__Clostridia; o__Clostridiales; f__unclassified_Clostridiales; g__unclassified_Clostridiales; s__unclassified_Clostridiales
ASV_14291	0.0	0.0	0.0	0.0	13.0	0.0	d__Bacteria; p__Actinobacteria; c__Thermoleophilia; o__Gaiellales; f__Gaiellaceae; g__unidentified_Gaiellaceae; s__unidentified_Gaiellaceae
ASV_14451	0.0	0.0	0.0	26.0	0.0	0.0	d__Bacteria; p__TM7; c__TM7-1; o__unidentified_TM7-1; f__unidentified_TM7-1; g__unidentified_TM7-1; s__unidentified_TM7-1
ASV_2203	0.0	0.0	0.0	19.0	16.0	0.0	d__Bacteria; p__Actinobacteria; c__Actinobacteria; o__Actinomycetales; f__Micromonosporaceae; g__unclassified_Micromonosporaceae; s__unclassified_Micromonosporaceae
ASV_5473	0.0	0.0	0.0	13.0	0.0	0.0	d__Bacteria; p__Firmicutes; c__Clostridia; o__Clostridiales; f__Lachnospiraceae; g__unidentified_Lachnospiraceae; s__unidentified_Lachnospiraceae
ASV_7277	0.0	0.0	0.0	26.0	0.0	0.0	d__Bacteria; p__Actinobacteria; c__Actinobacteria; o__Actinomycetales; f__Geodermatophilaceae; g__unidentified_Geodermatophilaceae; s__unidentified_Geodermatophilaceae
ASV_24420	0.0	0.0	0.0	8.0	0.0	0.0	d__Bacteria; p__Proteobacteria; c__Gammaproteobacteria; o__Pseudomonadales; f__Pseudomonadaceae; g__Pseudomonas; s__Pseudomonas_stutzeri
ASV_776	0.0	0.0	0.0	0.0	39.0	0.0	d__Bacteria; p__Firmicutes; c__Clostridia; o__Clostridiales; f__unidentified_Clostridiales; g__unidentified_Clostridiales; s__unidentified_Clostridiales
ASV_232	0.0	0.0	0.0	0.0	36.0	0.0	d__Bacteria; p__Proteobacteria; c__Alphaproteobacteria; o__Rhodospirillales; f__Acetobacteraceae; g__Roseomonas; s__unidentified_Roseomonas
ASV_3740	0.0	0.0	0.0	0.0	33.0	0.0	d__Bacteria; p__Proteobacteria; c__Alphaproteobacteria; o__Rhodospirillales; f__Rhodospirillaceae; g__unidentified_Rhodospirillaceae; s__unidentified_Rhodospirillaceae
ASV_20522	0.0	0.0	0.0	0.0	0.0	36.0	d__Bacteria; p__Verrucomicrobia; c__[Spartobacteria]; o__[Chthoniobacterales]; f__[Chthoniobacteraceae]; g__Candidatus_Xiphinematobacter; s__unidentified_Candidatus_Xiphinematobacter
ASV_12775	0.0	0.0	0.0	0.0	0.0	41.0	d__Bacteria; p__Actinobacteria; c__Actinobacteria; o__Actinomycetales; f__Pseudonocardiaceae; g__Pseudonocardia; s__unidentified_Pseudonocardia
ASV_17699	0.0	0.0	0.0	0.0	0.0	34.0	d__Bacteria; p__Acidobacteria; c__Solibacteres; o__Solibacterales; f__unidentified_Solibacterales; g__unidentified_Solibacterales; s__unidentified_Solibacterales
ASV_13020	0.0	0.0	0.0	0.0	0.0	34.0	d__Bacteria; p__Gemmatimonadetes; c__Gemm-1; o__unidentified_Gemm-1; f__unidentified_Gemm-1; g__unidentified_Gemm-1; s__unidentified_Gemm-1
ASV_19752	0.0	0.0	0.0	0.0	0.0	41.0	d__Bacteria; p__Proteobacteria; c__Betaproteobacteria; o__SC-I-84; f__unidentified_SC-I-84; g__unidentified_SC-I-84; s__unidentified_SC-I-84
ASV_5433	5.0	0.0	0.0	13.0	1.0	11.0	d__Bacteria; p__Bacteroidetes; c__Bacteroidia; o__Bacteroidales; f__S24-7; g__unidentified_S24-7; s__unidentified_S24-7
ASV_20637	0.0	45.0	0.0	0.0	0.0	0.0	d__Bacteria; p__Firmicutes; c__Clostridia; o__Clostridiales; f__Ruminococcaceae; g__Ruminococcus; s__Ruminococcus_bromii
ASV_24429	0.0	0.0	0.0	0.0	0.0	33.0	d__Bacteria; p__Firmicutes; c__Bacilli; o__Bacillales; f__Bacillaceae; g__Bacillus; s__Bacillus_thermoamylovorans
ASV_8553	0.0	0.0	0.0	9.0	11.0	14.0	d__Bacteria; p__Proteobacteria; c__Alphaproteobacteria; o__Caulobacterales; f__Caulobacteraceae; g__Phenylobacterium; s__unidentified_Phenylobacterium
ASV_14136	0.0	0.0	0.0	21.0	0.0	0.0	d__Bacteria; p__Proteobacteria; c__Epsilonproteobacteria; o__Campylobacterales; f__Campylobacteraceae; g__Arcobacter; s__unidentified_Arcobacter
ASV_3046	0.0	0.0	0.0	26.0	0.0	0.0	d__Bacteria; p__Firmicutes; c__Clostridia; o__Clostridiales; f__Clostridiaceae; g__SMB53; s__unidentified_SMB53
ASV_2379	0.0	0.0	0.0	27.0	0.0	0.0	d__Bacteria; p__Firmicutes; c__Clostridia; o__Clostridiales; f__unclassified_Clostridiales; g__unclassified_Clostridiales; s__unclassified_Clostridiales
ASV_17998	0.0	0.0	0.0	26.0	0.0	0.0	d__Bacteria; p__Proteobacteria; c__Gammaproteobacteria; o__Xanthomonadales; f__Xanthomonadaceae; g__Rhodanobacter; s__unclassified_Rhodanobacter
ASV_16554	0.0	0.0	0.0	0.0	51.0	0.0	d__Bacteria; p__Bacteroidetes; c__[Saprospirae]; o__[Saprospirales]; f__Chitinophagaceae; g__unidentified_Chitinophagaceae; s__unidentified_Chitinophagaceae
ASV_4785	0.0	0.0	0.0	0.0	36.0	0.0	d__Bacteria; p__Actinobacteria; c__Actinobacteria; o__Actinomycetales; f__Nocardioidaceae; g__unidentified_Nocardioidaceae; s__unidentified_Nocardioidaceae
ASV_1940	0.0	0.0	0.0	0.0	34.0	0.0	d__Bacteria; p__Proteobacteria; c__Alphaproteobacteria; o__Rhodospirillales; f__Rhodospirillaceae; g__unidentified_Rhodospirillaceae; s__unidentified_Rhodospirillaceae
ASV_21875	0.0	0.0	0.0	0.0	38.0	0.0	d__Bacteria; p__Actinobacteria; c__Thermoleophilia; o__Solirubrobacterales; f__unidentified_Solirubrobacterales; g__unidentified_Solirubrobacterales; s__unidentified_Solirubrobacterales
ASV_16557	0.0	0.0	0.0	0.0	0.0	41.0	d__Bacteria; p__Firmicutes; c__Clostridia; o__Clostridiales; f__Clostridiaceae; g__Proteiniclasticum; s__unidentified_Proteiniclasticum
ASV_9271	0.0	0.0	0.0	0.0	0.0	29.0	d__Bacteria; p__Firmicutes; c__Clostridia; o__Clostridiales; f__Lachnospiraceae; g__unclassified_Lachnospiraceae; s__unclassified_Lachnospiraceae
ASV_6916	0.0	0.0	0.0	0.0	0.0	35.0	d__Bacteria; p__Chloroflexi; c__TK10; o__B07_WMSP1; f__FFCH4570; g__unidentified_FFCH4570; s__unidentified_FFCH4570
ASV_12596	15.0	0.0	0.0	0.0	0.0	0.0	d__Bacteria; p__Firmicutes; c__Bacilli; o__Lactobacillales; f__Lactobacillaceae; g__Lactobacillus; s__unclassified_Lactobacillus
ASV_25695	3.0	0.0	6.0	0.0	0.0	31.0	d__Bacteria; p__Bacteroidetes; c__Bacteroidia; o__Bacteroidales; f__unidentified_Bacteroidales; g__unidentified_Bacteroidales; s__unidentified_Bacteroidales
ASV_18059	8.0	16.0	3.0	0.0	0.0	0.0	d__Bacteria; p__Firmicutes; c__Clostridia; o__Clostridiales; f__Ruminococcaceae; g__Oscillospira; s__unidentified_Oscillospira
ASV_12436	7.0	0.0	0.0	0.0	0.0	0.0	d__Bacteria; p__Firmicutes; c__Clostridia; o__Clostridiales; f__Ruminococcaceae; g__Oscillospira; s__unidentified_Oscillospira
ASV_21393	0.0	48.0	0.0	0.0	0.0	0.0	d__Bacteria; p__Cyanobacteria; c__4C0d-2; o__YS2; f__unidentified_YS2; g__unidentified_YS2; s__unidentified_YS2
ASV_11544	0.0	0.0	0.0	16.0	0.0	0.0	d__Bacteria; p__Firmicutes; c__Clostridia; o__Clostridiales; f__Ruminococcaceae; g__Oscillospira; s__unidentified_Oscillospira
ASV_16693	0.0	0.0	0.0	10.0	0.0	0.0	d__Bacteria; p__Actinobacteria; c__Actinobacteria; o__Actinomycetales; f__Streptomycetaceae; g__Streptomyces; s__unclassified_Streptomyces
ASV_15491	0.0	0.0	0.0	13.0	0.0	0.0	d__Bacteria; p__Proteobacteria; c__Deltaproteobacteria; o__Syntrophobacterales; f__Syntrophobacteraceae; g__unidentified_Syntrophobacteraceae; s__unidentified_Syntrophobacteraceae
ASV_10808	0.0	0.0	0.0	1.0	13.0	3.0	d__Bacteria; p__Proteobacteria; c__Gammaproteobacteria; o__Pseudomonadales; f__Moraxellaceae; g__Acinetobacter; s__unclassified_Acinetobacter
ASV_6330	0.0	0.0	0.0	18.0	0.0	0.0	d__Bacteria; p__Firmicutes; c__Clostridia; o__Clostridiales; f__Lachnospiraceae; g__unidentified_Lachnospiraceae; s__unidentified_Lachnospiraceae
ASV_24799	0.0	0.0	0.0	7.0	0.0	17.0	d__Bacteria; p__Firmicutes; c__Clostridia; o__Clostridiales; f__unidentified_Clostridiales; g__unidentified_Clostridiales; s__unidentified_Clostridiales
ASV_25928	0.0	0.0	0.0	28.0	0.0	0.0	d__Bacteria; p__Proteobacteria; c__Deltaproteobacteria; o__Desulfovibrionales; f__Desulfovibrionaceae; g__Desulfovibrio; s__unidentified_Desulfovibrio
ASV_19140	0.0	0.0	0.0	29.0	0.0	0.0	d__Bacteria; p__Gemmatimonadetes; c__Gemmatimonadetes; o__N1423WL; f__unidentified_N1423WL; g__unidentified_N1423WL; s__unidentified_N1423WL
ASV_24161	0.0	0.0	0.0	0.0	10.0	21.0	d__Bacteria; p__Chloroflexi; c__TK17; o__unidentified_TK17; f__unidentified_TK17; g__unidentified_TK17; s__unidentified_TK17
ASV_18666	0.0	0.0	0.0	0.0	43.0	0.0	d__Bacteria; p__Proteobacteria; c__Betaproteobacteria; o__Burkholderiales; f__Oxalobacteraceae; g__Herbaspirillum; s__unclassified_Herbaspirillum
ASV_3277	0.0	0.0	0.0	0.0	38.0	0.0	d__Bacteria; p__Actinobacteria; c__Actinobacteria; o__Actinomycetales; f__Microbacteriaceae; g__unclassified_Microbacteriaceae; s__unclassified_Microbacteriaceae
ASV_5566	0.0	0.0	0.0	0.0	33.0	0.0	d__Bacteria; p__Actinobacteria; c__Actinobacteria; o__Actinomycetales; f__Micromonosporaceae; g__unclassified_Micromonosporaceae; s__unclassified_Micromonosporaceae
ASV_10372	0.0	0.0	0.0	0.0	17.0	20.0	d__Bacteria; p__Proteobacteria; c__Alphaproteobacteria; o__Rhodospirillales; f__Rhodospirillaceae; g__unidentified_Rhodospirillaceae; s__unidentified_Rhodospirillaceae
ASV_3709	0.0	0.0	0.0	0.0	39.0	0.0	d__Bacteria; p__Firmicutes; c__Clostridia; o__Clostridiales; f__Veillonellaceae; g__unclassified_Veillonellaceae; s__unclassified_Veillonellaceae
ASV_10298	0.0	0.0	0.0	0.0	0.0	36.0	d__Bacteria; p__Firmicutes; c__Bacilli; o__Bacillales; f__Planococcaceae; g__Sporosarcina; s__unidentified_Sporosarcina
ASV_18149	0.0	0.0	0.0	0.0	0.0	34.0	d__Bacteria; p__Bacteroidetes; c__Flavobacteriia; o__Flavobacteriales; f__Flavobacteriaceae; g__Flavobacterium; s__unidentified_Flavobacterium
ASV_25352	0.0	0.0	0.0	0.0	0.0	41.0	d__Bacteria; p__Actinobacteria; c__Actinobacteria; o__Actinomycetales; f__Micromonosporaceae; g__unclassified_Micromonosporaceae; s__unclassified_Micromonosporaceae
ASV_8606	0.0	0.0	0.0	0.0	0.0	36.0	d__Bacteria; p__Actinobacteria; c__Actinobacteria; o__Actinomycetales; f__Geodermatophilaceae; g__unidentified_Geodermatophilaceae; s__unidentified_Geodermatophilaceae
ASV_3733	0.0	0.0	0.0	0.0	0.0	39.0	d__Bacteria; p__Proteobacteria; c__Alphaproteobacteria; o__Rhodospirillales; f__Acetobacteraceae; g__unidentified_Acetobacteraceae; s__unidentified_Acetobacteraceae
ASV_8744	0.0	0.0	0.0	0.0	0.0	31.0	d__Bacteria; p__Proteobacteria; c__Gammaproteobacteria; o__Pseudomonadales; f__Pseudomonadaceae; g__Pseudomonas; s__Pseudomonas_viridiflava
ASV_10155	0.0	0.0	0.0	0.0	0.0	35.0	d__Bacteria; p__Proteobacteria; c__Gammaproteobacteria; o__Legionellales; f__unidentified_Legionellales; g__unidentified_Legionellales; s__unidentified_Legionellales
ASV_8652	0.0	0.0	0.0	0.0	0.0	17.0	d__Bacteria; p__Firmicutes; c__Clostridia; o__Clostridiales; f__Ruminococcaceae; g__unidentified_Ruminococcaceae; s__unidentified_Ruminococcaceae
ASV_19652	0.0	0.0	0.0	0.0	0.0	35.0	d__Bacteria; p__Proteobacteria; c__Betaproteobacteria; o__Burkholderiales; f__Comamonadaceae; g__Polaromonas; s__unidentified_Polaromonas
ASV_10940	3.0	9.0	0.0	0.0	0.0	4.0	d__Bacteria; p__Bacteroidetes; c__Bacteroidia; o__Bacteroidales; f__Porphyromonadaceae; g__Parabacteroides; s__Parabacteroides_distasonis
ASV_20598	41.0	0.0	0.0	0.0	0.0	0.0	d__Bacteria; p__Firmicutes; c__Clostridia; o__Clostridiales; f__Lachnospiraceae; g__unidentified_Lachnospiraceae; s__unidentified_Lachnospiraceae
ASV_25048	13.0	0.0	18.0	0.0	0.0	0.0	d__Bacteria; p__Firmicutes; c__Clostridia; o__Clostridiales; f__Ruminococcaceae; g__Oscillospira; s__unidentified_Oscillospira
ASV_24426	21.0	12.0	13.0	0.0	0.0	0.0	d__Bacteria; p__Firmicutes; c__Clostridia; o__Clostridiales; f__Ruminococcaceae; g__Oscillospira; s__unidentified_Oscillospira
ASV_21564	0.0	8.0	0.0	0.0	6.0	5.0	d__Bacteria; p__Proteobacteria; c__Alphaproteobacteria; o__Rickettsiales; f__unidentified_Rickettsiales; g__unidentified_Rickettsiales; s__unidentified_Rickettsiales
ASV_2653	0.0	0.0	8.0	0.0	0.0	7.0	d__Bacteria; p__Firmicutes; c__Clostridia; o__Clostridiales; f__Ruminococcaceae; g__Ruminococcus; s__unidentified_Ruminococcus
ASV_2219	0.0	0.0	18.0	0.0	0.0	0.0	d__Bacteria; p__Firmicutes; c__Clostridia; o__Clostridiales; f__Ruminococcaceae; g__Oscillospira; s__unidentified_Oscillospira
ASV_5021	0.0	0.0	0.0	0.0	17.0	5.0	d__Bacteria; p__Firmicutes; c__Clostridia; o__Clostridiales; f__Ruminococcaceae; g__Oscillospira; s__unidentified_Oscillospira
ASV_11425	0.0	0.0	0.0	10.0	0.0	0.0	d__Bacteria; p__Proteobacteria; c__Alphaproteobacteria; o__Caulobacterales; f__Caulobacteraceae; g__Phenylobacterium; s__unidentified_Phenylobacterium
ASV_23028	0.0	0.0	0.0	4.0	9.0	10.0	d__Bacteria; p__Firmicutes; c__Clostridia; o__Clostridiales; f__Ruminococcaceae; g__unidentified_Ruminococcaceae; s__unidentified_Ruminococcaceae
ASV_1101	0.0	0.0	0.0	23.0	0.0	0.0	d__Bacteria; p__Gemmatimonadetes; c__Gemm-1; o__unidentified_Gemm-1; f__unidentified_Gemm-1; g__unidentified_Gemm-1; s__unidentified_Gemm-1
ASV_26397	0.0	0.0	0.0	0.0	20.0	12.0	d__Bacteria; p__Actinobacteria; c__Actinobacteria; o__Actinomycetales; f__Micromonosporaceae; g__Virgisporangium; s__unidentified_Virgisporangium
ASV_18980	0.0	0.0	0.0	0.0	43.0	0.0	d__Bacteria; p__Actinobacteria; c__Actinobacteria; o__unclassified_Actinobacteria; f__unclassified_Actinobacteria; g__unclassified_Actinobacteria; s__unclassified_Actinobacteria
ASV_7496	0.0	0.0	0.0	0.0	41.0	0.0	d__Bacteria; p__Proteobacteria; c__Alphaproteobacteria; o__Rhodospirillales; f__Acetobacteraceae; g__unidentified_Acetobacteraceae; s__unidentified_Acetobacteraceae
ASV_15016	0.0	0.0	0.0	0.0	40.0	0.0	d__Bacteria; p__Acidobacteria; c__Acidobacteria-6; o__iii1-15; f__unidentified_iii1-15; g__unidentified_iii1-15; s__unidentified_iii1-15
ASV_5824	0.0	0.0	0.0	0.0	0.0	38.0	d__Bacteria; p__Firmicutes; c__Bacilli; o__Bacillales; f__Thermoactinomycetaceae; g__Shimazuella; s__unidentified_Shimazuella
ASV_18318	0.0	0.0	0.0	0.0	0.0	37.0	d__Bacteria; p__Bacteroidetes; c__Bacteroidia; o__Bacteroidales; f__Prevotellaceae; g__Prevotella; s__Prevotella_copri
ASV_1894	0.0	0.0	0.0	0.0	0.0	29.0	d__Bacteria; p__Bacteroidetes; c__Bacteroidia; o__Bacteroidales; f__S24-7; g__unidentified_S24-7; s__unidentified_S24-7
ASV_24403	0.0	0.0	0.0	0.0	0.0	35.0	d__Bacteria; p__Proteobacteria; c__Betaproteobacteria; o__Burkholderiales; f__Alcaligenaceae; g__unidentified_Alcaligenaceae; s__unidentified_Alcaligenaceae
ASV_2820	0.0	0.0	0.0	0.0	0.0	33.0	d__Bacteria; p__Tenericutes; c__Mollicutes; o__RF39; f__unidentified_RF39; g__unidentified_RF39; s__unidentified_RF39
ASV_12080	18.0	12.0	16.0	0.0	0.0	0.0	d__Bacteria; p__Firmicutes; c__Bacilli; o__Lactobacillales; f__Lactobacillaceae; g__Lactobacillus; s__Lactobacillus_paralimentarius
ASV_20261	7.0	15.0	0.0	0.0	9.0	0.0	d__Bacteria; p__Proteobacteria; c__Betaproteobacteria; o__Burkholderiales; f__Alcaligenaceae; g__Sutterella; s__unidentified_Sutterella
ASV_20960	0.0	6.0	6.0	9.0	0.0	3.0	d__Bacteria; p__Firmicutes; c__Erysipelotrichi; o__Erysipelotrichales; f__Erysipelotrichaceae; g__cc_115; s__unidentified_cc_115
ASV_25523	0.0	7.0	3.0	0.0	3.0	0.0	d__Bacteria; p__Firmicutes; c__Clostridia; o__Clostridiales; f__Ruminococcaceae; g__unidentified_Ruminococcaceae; s__unidentified_Ruminococcaceae
ASV_14858	0.0	7.0	0.0	0.0	0.0	0.0	d__Bacteria; p__Firmicutes; c__Clostridia; o__Clostridiales; f__[Mogibacteriaceae]; g__unidentified_[Mogibacteriaceae]; s__unidentified_[Mogibacteriaceae]
ASV_16961	0.0	0.0	0.0	8.0	0.0	0.0	d__Bacteria; p__Firmicutes; c__Clostridia; o__Clostridiales; f__Veillonellaceae; g__unidentified_Veillonellaceae; s__unidentified_Veillonellaceae
ASV_20303	0.0	0.0	0.0	12.0	0.0	0.0	d__Bacteria; p__Bacteroidetes; c__[Saprospirae]; o__[Saprospirales]; f__Chitinophagaceae; g__unidentified_Chitinophagaceae; s__unidentified_Chitinophagaceae
ASV_23408	0.0	0.0	0.0	0.0	0.0	7.0	d__Bacteria; p__Verrucomicrobia; c__[Spartobacteria]; o__[Chthoniobacterales]; f__[Chthoniobacteraceae]; g__DA101; s__unidentified_DA101
ASV_22329	0.0	0.0	0.0	0.0	19.0	0.0	d__Bacteria; p__Proteobacteria; c__Alphaproteobacteria; o__Rhizobiales; f__Methylobacteriaceae; g__Methylobacterium; s__unclassified_Methylobacterium
ASV_10868	0.0	0.0	0.0	28.0	0.0	0.0	d__Bacteria; p__Bacteroidetes; c__[Saprospirae]; o__[Saprospirales]; f__Saprospiraceae; g__unidentified_Saprospiraceae; s__unidentified_Saprospiraceae
ASV_6561	0.0	0.0	0.0	23.0	0.0	0.0	d__Bacteria; p__TM7; c__TM7-3; o__unidentified_TM7-3; f__unidentified_TM7-3; g__unidentified_TM7-3; s__unidentified_TM7-3
ASV_14298	0.0	0.0	0.0	2.0	0.0	25.0	d__Bacteria; p__Proteobacteria; c__Gammaproteobacteria; o__Aeromonadales; f__Succinivibrionaceae; g__Succinivibrio; s__unidentified_Succinivibrio
ASV_26290	0.0	0.0	0.0	24.0	0.0	0.0	d__Bacteria; p__Firmicutes; c__Bacilli; o__Lactobacillales; f__Lactobacillaceae; g__Lactobacillus; s__Lactobacillus_vaginalis
ASV_24480	0.0	0.0	0.0	23.0	0.0	0.0	d__Bacteria; p__Bacteroidetes; c__Bacteroidia; o__Bacteroidales; f__S24-7; g__unidentified_S24-7; s__unidentified_S24-7
ASV_6991	0.0	0.0	0.0	24.0	0.0	0.0	d__Bacteria; p__Firmicutes; c__Clostridia; o__Clostridiales; f__Peptostreptococcaceae; g__unidentified_Peptostreptococcaceae; s__unidentified_Peptostreptococcaceae
ASV_13764	0.0	0.0	0.0	25.0	0.0	0.0	d__Bacteria; p__Actinobacteria; c__Actinobacteria; o__Actinomycetales; f__Streptosporangiaceae; g__unclassified_Streptosporangiaceae; s__unclassified_Streptosporangiaceae
ASV_17985	0.0	0.0	0.0	27.0	0.0	0.0	d__Bacteria; p__unclassified_Bacteria; c__unclassified_Bacteria; o__unclassified_Bacteria; f__unclassified_Bacteria; g__unclassified_Bacteria; s__unclassified_Bacteria
ASV_734	0.0	0.0	0.0	0.0	31.0	0.0	d__Bacteria; p__unidentified_Bacteria; c__unidentified_Bacteria; o__unidentified_Bacteria; f__unidentified_Bacteria; g__unidentified_Bacteria; s__unidentified_Bacteria
ASV_18492	0.0	0.0	0.0	0.0	43.0	0.0	d__Bacteria; p__Gemmatimonadetes; c__Gemmatimonadetes; o__unidentified_Gemmatimonadetes; f__unidentified_Gemmatimonadetes; g__unidentified_Gemmatimonadetes; s__unidentified_Gemmatimonadetes
ASV_8523	0.0	0.0	0.0	0.0	39.0	0.0	d__Bacteria; p__Actinobacteria; c__Thermoleophilia; o__Gaiellales; f__Gaiellaceae; g__unidentified_Gaiellaceae; s__unidentified_Gaiellaceae
ASV_21346	0.0	0.0	0.0	0.0	35.0	0.0	d__Bacteria; p__Proteobacteria; c__Betaproteobacteria; o__Rhodocyclales; f__Rhodocyclaceae; g__Azoarcus; s__unidentified_Azoarcus
ASV_19927	0.0	0.0	0.0	0.0	0.0	32.0	d__Bacteria; p__Actinobacteria; c__Actinobacteria; o__Actinomycetales; f__Micromonosporaceae; g__Micromonospora; s__unclassified_Micromonospora
ASV_11064	0.0	0.0	0.0	0.0	0.0	39.0	d__Bacteria; p__Proteobacteria; c__Gammaproteobacteria; o__Pseudomonadales; f__Moraxellaceae; g__Acinetobacter; s__unidentified_Acinetobacter
ASV_21095	0.0	0.0	0.0	0.0	0.0	39.0	d__Bacteria; p__Proteobacteria; c__Gammaproteobacteria; o__Pseudomonadales; f__Moraxellaceae; g__Acinetobacter; s__unclassified_Acinetobacter
ASV_10093	0.0	0.0	0.0	0.0	0.0	39.0	d__Bacteria; p__Firmicutes; c__Clostridia; o__Clostridiales; f__Veillonellaceae; g__unidentified_Veillonellaceae; s__unidentified_Veillonellaceae
ASV_23933	0.0	0.0	0.0	0.0	0.0	11.0	d__Bacteria; p__Firmicutes; c__Clostridia; o__Clostridiales; f__Ruminococcaceae; g__Ruminococcus; s__unidentified_Ruminococcus
ASV_5947	0.0	0.0	0.0	0.0	0.0	32.0	d__Bacteria; p__Proteobacteria; c__Alphaproteobacteria; o__Rhizobiales; f__Bradyrhizobiaceae; g__unclassified_Bradyrhizobiaceae; s__unclassified_Bradyrhizobiaceae
ASV_13723	7.0	6.0	12.0	0.0	0.0	0.0	d__Bacteria; p__Bacteroidetes; c__Bacteroidia; o__Bacteroidales; f__S24-7; g__unidentified_S24-7; s__unidentified_S24-7
ASV_5640	2.0	0.0	31.0	4.0	0.0	1.0	d__Bacteria; p__Bacteroidetes; c__Bacteroidia; o__Bacteroidales; f__S24-7; g__unidentified_S24-7; s__unidentified_S24-7
ASV_21755	8.0	0.0	0.0	0.0	8.0	9.0	d__Bacteria; p__Firmicutes; c__Clostridia; o__Clostridiales; f__[Mogibacteriaceae]; g__unidentified_[Mogibacteriaceae]; s__unidentified_[Mogibacteriaceae]
ASV_6216	16.0	6.0	0.0	0.0	0.0	0.0	d__Bacteria; p__Firmicutes; c__Clostridia; o__Clostridiales; f__[Mogibacteriaceae]; g__unidentified_[Mogibacteriaceae]; s__unidentified_[Mogibacteriaceae]
ASV_23840	12.0	10.0	0.0	0.0	0.0	0.0	d__Bacteria; p__Firmicutes; c__Clostridia; o__Clostridiales; f__Ruminococcaceae; g__Oscillospira; s__unidentified_Oscillospira
ASV_10091	1.0	10.0	0.0	0.0	0.0	0.0	d__Bacteria; p__Firmicutes; c__Clostridia; o__Clostridiales; f__Ruminococcaceae; g__Oscillospira; s__unidentified_Oscillospira
ASV_12456	2.0	0.0	5.0	0.0	0.0	17.0	d__Bacteria; p__Firmicutes; c__Clostridia; o__Clostridiales; f__Ruminococcaceae; g__unidentified_Ruminococcaceae; s__unidentified_Ruminococcaceae
ASV_6753	7.0	0.0	4.0	0.0	8.0	0.0	d__Bacteria; p__Firmicutes; c__Clostridia; o__Clostridiales; f__Ruminococcaceae; g__Ruminococcus; s__unidentified_Ruminococcus
ASV_6188	0.0	17.0	25.0	1.0	0.0	0.0	d__Bacteria; p__Tenericutes; c__Mollicutes; o__RF39; f__unidentified_RF39; g__unidentified_RF39; s__unidentified_RF39
ASV_7543	0.0	0.0	0.0	13.0	2.0	0.0	d__Bacteria; p__Firmicutes; c__Erysipelotrichi; o__Erysipelotrichales; f__Erysipelotrichaceae; g__Coprobacillus; s__unidentified_Coprobacillus
ASV_7765	0.0	0.0	0.0	27.0	0.0	0.0	d__Bacteria; p__unidentified_Bacteria; c__unidentified_Bacteria; o__unidentified_Bacteria; f__unidentified_Bacteria; g__unidentified_Bacteria; s__unidentified_Bacteria
ASV_10228	0.0	0.0	0.0	9.0	20.0	0.0	d__Bacteria; p__Proteobacteria; c__Alphaproteobacteria; o__Rhizobiales; f__Phyllobacteriaceae; g__Mesorhizobium; s__unidentified_Mesorhizobium
ASV_21592	0.0	0.0	0.0	12.0	0.0	19.0	d__Bacteria; p__Proteobacteria; c__Alphaproteobacteria; o__Ellin329; f__unidentified_Ellin329; g__unidentified_Ellin329; s__unidentified_Ellin329
ASV_8286	0.0	0.0	0.0	0.0	38.0	0.0	d__Bacteria; p__Firmicutes; c__Bacilli; o__Bacillales; f__Bacillaceae; g__Bacillus; s__Bacillus_flexus
ASV_23309	0.0	0.0	0.0	0.0	38.0	0.0	d__Bacteria; p__Proteobacteria; c__Gammaproteobacteria; o__Pseudomonadales; f__Moraxellaceae; g__Acinetobacter; s__unidentified_Acinetobacter
ASV_2696	0.0	0.0	0.0	0.0	34.0	0.0	d__Bacteria; p__Bacteroidetes; c__Flavobacteriia; o__Flavobacteriales; f__Flavobacteriaceae; g__Flavobacterium; s__Flavobacterium_frigidarium
ASV_9689	0.0	0.0	0.0	0.0	36.0	0.0	d__Bacteria; p__Actinobacteria; c__Actinobacteria; o__Actinomycetales; f__Micrococcaceae; g__Arthrobacter; s__unclassified_Arthrobacter
ASV_7954	0.0	0.0	0.0	0.0	33.0	0.0	d__Bacteria; p__unclassified_Bacteria; c__unclassified_Bacteria; o__unclassified_Bacteria; f__unclassified_Bacteria; g__unclassified_Bacteria; s__unclassified_Bacteria
ASV_4482	0.0	0.0	0.0	0.0	28.0	0.0	d__Bacteria; p__Actinobacteria; c__Rubrobacteria; o__Rubrobacterales; f__Rubrobacteraceae; g__Rubrobacter; s__unidentified_Rubrobacter
ASV_21132	0.0	0.0	0.0	0.0	22.0	0.0	d__Bacteria; p__Firmicutes; c__Clostridia; o__Clostridiales; f__Ruminococcaceae; g__Oscillospira; s__unidentified_Oscillospira
ASV_21316	0.0	0.0	0.0	0.0	0.0	32.0	d__Bacteria; p__TM7; c__TM7-1; o__unidentified_TM7-1; f__unidentified_TM7-1; g__unidentified_TM7-1; s__unidentified_TM7-1
ASV_21532	0.0	0.0	0.0	0.0	0.0	38.0	d__Bacteria; p__Actinobacteria; c__Actinobacteria; o__Actinomycetales; f__Micromonosporaceae; g__unclassified_Micromonosporaceae; s__unclassified_Micromonosporaceae
ASV_2486	0.0	0.0	0.0	0.0	0.0	31.0	d__Bacteria; p__Acidobacteria; c__[Chloracidobacteria]; o__RB41; f__Ellin6075; g__unidentified_Ellin6075; s__unidentified_Ellin6075
ASV_14679	0.0	0.0	0.0	0.0	0.0	34.0	d__Bacteria; p__WPS-2; c__unidentified_WPS-2; o__unidentified_WPS-2; f__unidentified_WPS-2; g__unidentified_WPS-2; s__unidentified_WPS-2
ASV_22970	0.0	0.0	0.0	0.0	0.0	36.0	d__Bacteria; p__Acidobacteria; c__Acidobacteriia; o__Acidobacteriales; f__Koribacteraceae; g__Candidatus_Koribacter; s__unidentified_Candidatus_Koribacter
ASV_25386	0.0	0.0	0.0	0.0	0.0	28.0	d__Bacteria; p__Proteobacteria; c__Alphaproteobacteria; o__Rhodospirillales; f__unidentified_Rhodospirillales; g__unidentified_Rhodospirillales; s__unidentified_Rhodospirillales
ASV_17674	0.0	0.0	0.0	0.0	0.0	36.0	d__Bacteria; p__Actinobacteria; c__Acidimicrobiia; o__Acidimicrobiales; f__EB1017; g__unidentified_EB1017; s__unidentified_EB1017
ASV_5567	13.0	0.0	7.0	0.0	0.0	0.0	d__Bacteria; p__Firmicutes; c__Clostridia; o__Clostridiales; f__Lachnospiraceae; g__Dorea; s__unclassified_Dorea
ASV_2961	5.0	0.0	0.0	10.0	0.0	0.0	d__Bacteria; p__Firmicutes; c__Clostridia; o__Clostridiales; f__Lachnospiraceae; g__unclassified_Lachnospiraceae; s__unclassified_Lachnospiraceae
ASV_9752	8.0	0.0	0.0	0.0	0.0	0.0	d__Bacteria; p__Firmicutes; c__Clostridia; o__Clostridiales; f__Ruminococcaceae; g__Ruminococcus; s__unidentified_Ruminococcus
ASV_14934	0.0	10.0	0.0	0.0	0.0	0.0	d__Bacteria; p__Tenericutes; c__Mollicutes; o__RF39; f__unidentified_RF39; g__unidentified_RF39; s__unidentified_RF39
ASV_15654	0.0	0.0	35.0	0.0	0.0	0.0	d__Bacteria; p__Bacteroidetes; c__Bacteroidia; o__Bacteroidales; f__S24-7; g__unidentified_S24-7; s__unidentified_S24-7
ASV_15932	0.0	0.0	7.0	0.0	12.0	23.0	d__Bacteria; p__Firmicutes; c__Clostridia; o__Clostridiales; f__Ruminococcaceae; g__Ruminococcus; s__Ruminococcus_albus
ASV_2091	0.0	0.0	11.0	0.0	0.0	0.0	d__Bacteria; p__Firmicutes; c__Clostridia; o__Clostridiales; f__Ruminococcaceae; g__unidentified_Ruminococcaceae; s__unidentified_Ruminococcaceae
ASV_6822	0.0	0.0	0.0	16.0	0.0	0.0	d__Bacteria; p__Proteobacteria; c__Gammaproteobacteria; o__Pseudomonadales; f__Moraxellaceae; g__Acinetobacter; s__Acinetobacter_schindleri
ASV_1567	0.0	0.0	0.0	0.0	7.0	0.0	d__Bacteria; p__Proteobacteria; c__Deltaproteobacteria; o__Myxococcales; f__unidentified_Myxococcales; g__unidentified_Myxococcales; s__unidentified_Myxococcales
ASV_6791	0.0	0.0	0.0	17.0	0.0	0.0	d__Bacteria; p__Bacteroidetes; c__Sphingobacteriia; o__Sphingobacteriales; f__Sphingobacteriaceae; g__Mucilaginibacter; s__Mucilaginibacter_ximonensis
ASV_18484	0.0	0.0	0.0	5.0	0.0	0.0	d__Bacteria; p__Acidobacteria; c__Acidobacteriia; o__Acidobacteriales; f__Koribacteraceae; g__Candidatus_Koribacter; s__unidentified_Candidatus_Koribacter
ASV_4627	0.0	0.0	0.0	28.0	0.0	0.0	d__Bacteria; p__Acidobacteria; c__Solibacteres; o__Solibacterales; f__unidentified_Solibacterales; g__unidentified_Solibacterales; s__unidentified_Solibacterales
ASV_20189	0.0	0.0	0.0	22.0	0.0	0.0	d__Bacteria; p__Chloroflexi; c__Ktedonobacteria; o__B10-SB3A; f__unidentified_B10-SB3A; g__unidentified_B10-SB3A; s__unidentified_B10-SB3A
ASV_11137	0.0	0.0	0.0	26.0	0.0	0.0	d__Bacteria; p__Proteobacteria; c__Alphaproteobacteria; o__Rhodospirillales; f__Rhodospirillaceae; g__unidentified_Rhodospirillaceae; s__unidentified_Rhodospirillaceae
ASV_5966	0.0	0.0	0.0	25.0	0.0	0.0	d__Bacteria; p__Proteobacteria; c__Alphaproteobacteria; o__Caulobacterales; f__Caulobacteraceae; g__Phenylobacterium; s__unidentified_Phenylobacterium
ASV_1491	0.0	0.0	0.0	6.0	0.0	0.0	d__Bacteria; p__Firmicutes; c__Clostridia; o__Clostridiales; f__unidentified_Clostridiales; g__unidentified_Clostridiales; s__unidentified_Clostridiales
ASV_12130	0.0	0.0	0.0	19.0	0.0	0.0	d__Bacteria; p__unidentified_Bacteria; c__unidentified_Bacteria; o__unidentified_Bacteria; f__unidentified_Bacteria; g__unidentified_Bacteria; s__unidentified_Bacteria
ASV_1251	0.0	0.0	0.0	22.0	0.0	0.0	d__Bacteria; p__Firmicutes; c__Clostridia; o__Clostridiales; f__Ruminococcaceae; g__Ruminococcus; s__Ruminococcus_callidus
ASV_7214	0.0	0.0	0.0	0.0	34.0	0.0	d__Bacteria; p__Firmicutes; c__Bacilli; o__Bacillales; f__Alicyclobacillaceae; g__Alicyclobacillus; s__unidentified_Alicyclobacillus
ASV_6654	0.0	0.0	0.0	0.0	33.0	0.0	d__Bacteria; p__unclassified_Bacteria; c__unclassified_Bacteria; o__unclassified_Bacteria; f__unclassified_Bacteria; g__unclassified_Bacteria; s__unclassified_Bacteria
ASV_13815	0.0	0.0	0.0	0.0	38.0	0.0	d__Bacteria; p__TM7; c__TM7-1; o__unidentified_TM7-1; f__unidentified_TM7-1; g__unidentified_TM7-1; s__unidentified_TM7-1
ASV_19430	0.0	0.0	0.0	0.0	37.0	0.0	d__Bacteria; p__Firmicutes; c__Clostridia; o__Clostridiales; f__[Mogibacteriaceae]; g__unclassified_[Mogibacteriaceae]; s__unclassified_[Mogibacteriaceae]
ASV_21017	0.0	0.0	0.0	0.0	33.0	0.0	d__Bacteria; p__Actinobacteria; c__Actinobacteria; o__Actinomycetales; f__Nocardioidaceae; g__unclassified_Nocardioidaceae; s__unclassified_Nocardioidaceae
ASV_19810	0.0	0.0	0.0	0.0	32.0	0.0	d__Bacteria; p__Proteobacteria; c__Betaproteobacteria; o__Burkholderiales; f__Alcaligenaceae; g__unidentified_Alcaligenaceae; s__unidentified_Alcaligenaceae
ASV_7483	0.0	0.0	0.0	0.0	0.0	35.0	d__Bacteria; p__Bacteroidetes; c__[Saprospirae]; o__[Saprospirales]; f__Chitinophagaceae; g__unidentified_Chitinophagaceae; s__unidentified_Chitinophagaceae
ASV_10421	0.0	0.0	0.0	0.0	0.0	39.0	d__Bacteria; p__Proteobacteria; c__Alphaproteobacteria; o__unclassified_Alphaproteobacteria; f__unclassified_Alphaproteobacteria; g__unclassified_Alphaproteobacteria; s__unclassified_Alphaproteobacteria
ASV_10919	0.0	0.0	0.0	0.0	0.0	35.0	d__Bacteria; p__Proteobacteria; c__Gammaproteobacteria; o__Xanthomonadales; f__Xanthomonadaceae; g__Rhodanobacter; s__unclassified_Rhodanobacter
ASV_8100	0.0	0.0	0.0	0.0	0.0	35.0	d__Bacteria; p__Proteobacteria; c__Alphaproteobacteria; o__Rhodospirillales; f__Rhodospirillaceae; g__unidentified_Rhodospirillaceae; s__unidentified_Rhodospirillaceae
ASV_23759	0.0	0.0	0.0	0.0	0.0	32.0	d__Bacteria; p__Proteobacteria; c__Deltaproteobacteria; o__Myxococcales; f__Haliangiaceae; g__unidentified_Haliangiaceae; s__unidentified_Haliangiaceae
ASV_8845	0.0	0.0	0.0	0.0	0.0	37.0	d__Bacteria; p__Proteobacteria; c__Alphaproteobacteria; o__unclassified_Alphaproteobacteria; f__unclassified_Alphaproteobacteria; g__unclassified_Alphaproteobacteria; s__unclassified_Alphaproteobacteria
ASV_19438	0.0	0.0	0.0	0.0	0.0	34.0	d__Bacteria; p__[Thermi]; c__Deinococci; o__Deinococcales; f__Deinococcaceae; g__R18-435; s__unidentified_R18-435
ASV_21717	6.0	4.0	19.0	0.0	0.0	0.0	d__Bacteria; p__Bacteroidetes; c__Bacteroidia; o__Bacteroidales; f__S24-7; g__unidentified_S24-7; s__unidentified_S24-7
ASV_7537	11.0	0.0	0.0	0.0	14.0	11.0	d__Bacteria; p__Firmicutes; c__Clostridia; o__Clostridiales; f__Ruminococcaceae; g__unidentified_Ruminococcaceae; s__unidentified_Ruminococcaceae
ASV_1954	0.0	32.0	0.0	6.0	0.0	0.0	d__Bacteria; p__Firmicutes; c__Clostridia; o__Clostridiales; f__Ruminococcaceae; g__unidentified_Ruminococcaceae; s__unidentified_Ruminococcaceae
ASV_19768	0.0	0.0	5.0	6.0	0.0	0.0	d__Bacteria; p__Firmicutes; c__Clostridia; o__Clostridiales; f__Ruminococcaceae; g__Oscillospira; s__unidentified_Oscillospira
ASV_15446	0.0	0.0	15.0	0.0	0.0	0.0	d__Bacteria; p__Firmicutes; c__Clostridia; o__Clostridiales; f__Ruminococcaceae; g__Oscillospira; s__unidentified_Oscillospira
ASV_18443	0.0	0.0	46.0	0.0	0.0	0.0	d__Bacteria; p__Firmicutes; c__Clostridia; o__Clostridiales; f__Ruminococcaceae; g__unclassified_Ruminococcaceae; s__unclassified_Ruminococcaceae
ASV_22325	0.0	0.0	0.0	0.0	0.0	19.0	d__Bacteria; p__Bacteroidetes; c__Sphingobacteriia; o__Sphingobacteriales; f__Sphingobacteriaceae; g__unidentified_Sphingobacteriaceae; s__unidentified_Sphingobacteriaceae
ASV_5296	0.0	0.0	0.0	9.0	20.0	0.0	d__Bacteria; p__Firmicutes; c__Bacilli; o__Bacillales; f__Staphylococcaceae; g__Staphylococcus; s__unidentified_Staphylococcus
ASV_10187	0.0	0.0	0.0	22.0	0.0	0.0	d__Bacteria; p__TM7; c__TM7-1; o__unidentified_TM7-1; f__unidentified_TM7-1; g__unidentified_TM7-1; s__unidentified_TM7-1
ASV_13397	0.0	0.0	0.0	14.0	0.0	0.0	d__Bacteria; p__Chloroflexi; c__Ellin6529; o__unidentified_Ellin6529; f__unidentified_Ellin6529; g__unidentified_Ellin6529; s__unidentified_Ellin6529
ASV_3056	0.0	0.0	0.0	25.0	0.0	0.0	d__Bacteria; p__Firmicutes; c__Clostridia; o__Clostridiales; f__Clostridiaceae; g__Proteiniclasticum; s__unidentified_Proteiniclasticum
ASV_15049	0.0	0.0	0.0	13.0	0.0	17.0	d__Bacteria; p__Firmicutes; c__Clostridia; o__Clostridiales; f__Ruminococcaceae; g__Ruminococcus; s__Ruminococcus_albus
ASV_25457	0.0	0.0	0.0	17.0	8.0	0.0	d__Bacteria; p__Firmicutes; c__Clostridia; o__Clostridiales; f__Clostridiaceae; g__Clostridium; s__unclassified_Clostridium
ASV_9977	0.0	0.0	0.0	0.0	24.0	10.0	d__Bacteria; p__Actinobacteria; c__Actinobacteria; o__Actinomycetales; f__Microbacteriaceae; g__unclassified_Microbacteriaceae; s__unclassified_Microbacteriaceae
ASV_13500	0.0	0.0	0.0	0.0	36.0	0.0	d__Bacteria; p__Proteobacteria; c__Gammaproteobacteria; o__Xanthomonadales; f__Xanthomonadaceae; g__unclassified_Xanthomonadaceae; s__unclassified_Xanthomonadaceae
ASV_3169	0.0	0.0	0.0	0.0	39.0	0.0	d__Bacteria; p__Gemmatimonadetes; c__Gemmatimonadetes; o__unclassified_Gemmatimonadetes; f__unclassified_Gemmatimonadetes; g__unclassified_Gemmatimonadetes; s__unclassified_Gemmatimonadetes
ASV_11284	0.0	0.0	0.0	0.0	0.0	38.0	d__Bacteria; p__Chloroflexi; c__Thermomicrobia; o__unidentified_Thermomicrobia; f__unidentified_Thermomicrobia; g__unidentified_Thermomicrobia; s__unidentified_Thermomicrobia
ASV_19553	0.0	0.0	0.0	0.0	0.0	28.0	d__Bacteria; p__Proteobacteria; c__Gammaproteobacteria; o__Xanthomonadales; f__Xanthomonadaceae; g__Thermomonas; s__unidentified_Thermomonas
ASV_7003	0.0	0.0	0.0	0.0	0.0	35.0	d__Bacteria; p__[Thermi]; c__Deinococci; o__Deinococcales; f__Trueperaceae; g__B-42; s__unidentified_B-42
ASV_3560	0.0	0.0	0.0	0.0	0.0	27.0	d__Bacteria; p__Firmicutes; c__Clostridia; o__Clostridiales; f__Lachnospiraceae; g__unclassified_Lachnospiraceae; s__unclassified_Lachnospiraceae
ASV_20104	0.0	0.0	0.0	0.0	0.0	33.0	d__Bacteria; p__Proteobacteria; c__Gammaproteobacteria; o__Xanthomonadales; f__Xanthomonadaceae; g__unclassified_Xanthomonadaceae; s__unclassified_Xanthomonadaceae
ASV_17386	0.0	0.0	0.0	0.0	0.0	33.0	d__Bacteria; p__Actinobacteria; c__Actinobacteria; o__Actinomycetales; f__Nocardioidaceae; g__Nocardioides; s__unclassified_Nocardioides
ASV_26161	0.0	0.0	0.0	0.0	0.0	35.0	d__Bacteria; p__Proteobacteria; c__Betaproteobacteria; o__Burkholderiales; f__Oxalobacteraceae; g__Massilia; s__unclassified_Massilia
ASV_24178	19.0	0.0	0.0	0.0	0.0	0.0	d__Bacteria; p__Firmicutes; c__Bacilli; o__Lactobacillales; f__Lactobacillaceae; g__Lactobacillus; s__Lactobacillus_helveticus
ASV_5744	7.0	0.0	0.0	4.0	0.0	0.0	d__Bacteria; p__Cyanobacteria; c__4C0d-2; o__YS2; f__unidentified_YS2; g__unidentified_YS2; s__unidentified_YS2
ASV_6764	20.0	0.0	0.0	0.0	15.0	0.0	d__Bacteria; p__Firmicutes; c__Clostridia; o__Clostridiales; f__unidentified_Clostridiales; g__unidentified_Clostridiales; s__unidentified_Clostridiales
ASV_10286	14.0	11.0	0.0	0.0	0.0	0.0	d__Bacteria; p__Firmicutes; c__Clostridia; o__Clostridiales; f__Ruminococcaceae; g__unidentified_Ruminococcaceae; s__unidentified_Ruminococcaceae
ASV_14761	0.0	3.0	0.0	0.0	21.0	0.0	d__Bacteria; p__Firmicutes; c__Clostridia; o__Clostridiales; f__Ruminococcaceae; g__unidentified_Ruminococcaceae; s__unidentified_Ruminococcaceae
ASV_23058	0.0	9.0	18.0	0.0	0.0	10.0	d__Bacteria; p__Actinobacteria; c__Actinobacteria; o__Actinomycetales; f__unidentified_Actinomycetales; g__unidentified_Actinomycetales; s__unidentified_Actinomycetales
ASV_2813	0.0	0.0	0.0	0.0	19.0	0.0	d__Bacteria; p__Chloroflexi; c__Thermomicrobia; o__JG30-KF-CM45; f__unidentified_JG30-KF-CM45; g__unidentified_JG30-KF-CM45; s__unidentified_JG30-KF-CM45
ASV_11769	0.0	0.0	0.0	0.0	0.0	22.0	d__Bacteria; p__Actinobacteria; c__Actinobacteria; o__Actinomycetales; f__Nocardioidaceae; g__unidentified_Nocardioidaceae; s__unidentified_Nocardioidaceae
ASV_6924	0.0	0.0	0.0	21.0	0.0	0.0	d__Bacteria; p__Chloroflexi; c__Thermomicrobia; o__JG30-KF-CM45; f__unidentified_JG30-KF-CM45; g__unidentified_JG30-KF-CM45; s__unidentified_JG30-KF-CM45
ASV_22017	0.0	0.0	0.0	5.0	0.0	0.0	d__Bacteria; p__Firmicutes; c__Bacilli; o__Lactobacillales; f__Lactobacillaceae; g__unidentified_Lactobacillaceae; s__unidentified_Lactobacillaceae
ASV_22132	0.0	0.0	0.0	12.0	19.0	0.0	d__Bacteria; p__Firmicutes; c__Bacilli; o__Bacillales; f__Bacillaceae; g__Bacillus; s__unclassified_Bacillus
ASV_24228	0.0	0.0	0.0	22.0	0.0	0.0	d__Bacteria; p__Acidobacteria; c__Acidobacteria-6; o__iii1-15; f__RB40; g__unidentified_RB40; s__unidentified_RB40
ASV_20757	0.0	0.0	0.0	21.0	0.0	0.0	d__Bacteria; p__Actinobacteria; c__Actinobacteria; o__Actinomycetales; f__Micromonosporaceae; g__Micromonospora; s__unclassified_Micromonospora
ASV_6074	0.0	0.0	0.0	22.0	0.0	0.0	d__Bacteria; p__Firmicutes; c__Clostridia; o__Clostridiales; f__unclassified_Clostridiales; g__unclassified_Clostridiales; s__unclassified_Clostridiales
ASV_5439	0.0	0.0	0.0	8.0	0.0	20.0	d__Bacteria; p__Acidobacteria; c__Acidobacteriia; o__Acidobacteriales; f__Acidobacteriaceae; g__unidentified_Acidobacteriaceae; s__unidentified_Acidobacteriaceae
ASV_6497	0.0	0.0	0.0	0.0	34.0	0.0	d__Bacteria; p__Planctomycetes; c__Planctomycetia; o__Gemmatales; f__Gemmataceae; g__unidentified_Gemmataceae; s__unidentified_Gemmataceae
ASV_12859	0.0	0.0	0.0	0.0	31.0	0.0	d__Bacteria; p__Firmicutes; c__Clostridia; o__Clostridiales; f__Clostridiaceae; g__Proteiniclasticum; s__unidentified_Proteiniclasticum
ASV_12050	0.0	0.0	0.0	0.0	33.0	0.0	d__Bacteria; p__Actinobacteria; c__Actinobacteria; o__Actinomycetales; f__Kineosporiaceae; g__unidentified_Kineosporiaceae; s__unidentified_Kineosporiaceae
ASV_16152	0.0	0.0	0.0	0.0	32.0	0.0	d__Bacteria; p__Proteobacteria; c__Gammaproteobacteria; o__Thiotrichales; f__Piscirickettsiaceae; g__unidentified_Piscirickettsiaceae; s__unidentified_Piscirickettsiaceae
ASV_7330	0.0	0.0	0.0	0.0	0.0	31.0	d__Bacteria; p__Firmicutes; c__Bacilli; o__Lactobacillales; f__Aerococcaceae; g__unclassified_Aerococcaceae; s__unclassified_Aerococcaceae
ASV_24994	0.0	0.0	0.0	0.0	0.0	31.0	d__Bacteria; p__Nitrospirae; c__Nitrospira; o__Nitrospirales; f__Nitrospiraceae; g__unidentified_Nitrospiraceae; s__unidentified_Nitrospiraceae
ASV_19375	0.0	0.0	0.0	0.0	0.0	36.0	d__Bacteria; p__Chloroflexi; c__Ktedonobacteria; o__Ktedonobacterales; f__Ktedonobacteraceae; g__unidentified_Ktedonobacteraceae; s__unidentified_Ktedonobacteraceae
ASV_16040	0.0	0.0	0.0	0.0	0.0	34.0	d__Bacteria; p__Actinobacteria; c__Actinobacteria; o__Actinomycetales; f__Micromonosporaceae; g__unclassified_Micromonosporaceae; s__unclassified_Micromonosporaceae
ASV_4643	0.0	0.0	0.0	0.0	0.0	37.0	d__Bacteria; p__Firmicutes; c__Clostridia; o__Clostridiales; f__unclassified_Clostridiales; g__unclassified_Clostridiales; s__unclassified_Clostridiales
ASV_12047	0.0	0.0	0.0	0.0	0.0	34.0	d__Bacteria; p__Proteobacteria; c__Alphaproteobacteria; o__Rhodospirillales; f__Rhodospirillaceae; g__unidentified_Rhodospirillaceae; s__unidentified_Rhodospirillaceae
ASV_18066	9.0	8.0	7.0	0.0	0.0	0.0	d__Bacteria; p__Firmicutes; c__Bacilli; o__Bacillales; f__[Exiguobacteraceae]; g__Exiguobacterium; s__unidentified_Exiguobacterium
ASV_22878	29.0	0.0	0.0	0.0	0.0	0.0	d__Bacteria; p__Chlamydiae; c__Chlamydiia; o__unidentified_Chlamydiia; f__unidentified_Chlamydiia; g__unidentified_Chlamydiia; s__unidentified_Chlamydiia
ASV_6073	16.0	0.0	0.0	0.0	8.0	0.0	d__Bacteria; p__Bacteroidetes; c__Bacteroidia; o__Bacteroidales; f__Prevotellaceae; g__Prevotella; s__unidentified_Prevotella
ASV_15730	14.0	1.0	21.0	0.0	0.0	0.0	d__Bacteria; p__Bacteroidetes; c__Bacteroidia; o__Bacteroidales; f__S24-7; g__unidentified_S24-7; s__unidentified_S24-7
ASV_15731	16.0	0.0	0.0	0.0	0.0	0.0	d__Bacteria; p__Proteobacteria; c__Alphaproteobacteria; o__Rhizobiales; f__unclassified_Rhizobiales; g__unclassified_Rhizobiales; s__unclassified_Rhizobiales
ASV_4358	0.0	0.0	0.0	0.0	0.0	10.0	d__Bacteria; p__Firmicutes; c__Clostridia; o__Clostridiales; f__Lachnospiraceae; g__[Ruminococcus]; s__[Ruminococcus]_gnavus
ASV_17459	0.0	0.0	0.0	0.0	18.0	0.0	d__Bacteria; p__Firmicutes; c__Clostridia; o__Clostridiales; f__unclassified_Clostridiales; g__unclassified_Clostridiales; s__unclassified_Clostridiales
ASV_17410	0.0	0.0	0.0	0.0	0.0	10.0	d__Bacteria; p__Proteobacteria; c__Betaproteobacteria; o__Burkholderiales; f__Burkholderiaceae; g__Burkholderia; s__Burkholderia_tuberum
ASV_23806	0.0	0.0	0.0	27.0	0.0	0.0	d__Bacteria; p__Actinobacteria; c__Actinobacteria; o__Actinomycetales; f__Microbacteriaceae; g__unclassified_Microbacteriaceae; s__unclassified_Microbacteriaceae
ASV_17816	0.0	0.0	0.0	24.0	0.0	0.0	d__Bacteria; p__Actinobacteria; c__Actinobacteria; o__Actinomycetales; f__Sporichthyaceae; g__unidentified_Sporichthyaceae; s__unidentified_Sporichthyaceae
ASV_21589	0.0	0.0	0.0	24.0	0.0	0.0	d__Bacteria; p__Fusobacteria; c__Fusobacteriia; o__Fusobacteriales; f__Fusobacteriaceae; g__Fusobacterium; s__unidentified_Fusobacterium
ASV_1752	0.0	0.0	0.0	10.0	0.0	20.0	d__Bacteria; p__Gemmatimonadetes; c__Gemmatimonadetes; o__Ellin5290; f__unidentified_Ellin5290; g__unidentified_Ellin5290; s__unidentified_Ellin5290
ASV_21447	0.0	0.0	0.0	24.0	0.0	0.0	d__Bacteria; p__Actinobacteria; c__Acidimicrobiia; o__Acidimicrobiales; f__C111; g__unidentified_C111; s__unidentified_C111
ASV_8059	0.0	0.0	0.0	30.0	0.0	0.0	d__Bacteria; p__Actinobacteria; c__Thermoleophilia; o__Gaiellales; f__Gaiellaceae; g__unidentified_Gaiellaceae; s__unidentified_Gaiellaceae
ASV_18173	0.0	0.0	0.0	0.0	28.0	0.0	d__Bacteria; p__Firmicutes; c__Bacilli; o__Lactobacillales; f__Lactobacillaceae; g__Lactobacillus; s__Lactobacillus_helveticus
ASV_21252	0.0	0.0	0.0	0.0	31.0	0.0	d__Bacteria; p__Proteobacteria; c__Gammaproteobacteria; o__Enterobacteriales; f__Enterobacteriaceae; g__unclassified_Enterobacteriaceae; s__unclassified_Enterobacteriaceae
ASV_14422	0.0	0.0	0.0	0.0	33.0	0.0	d__Bacteria; p__Actinobacteria; c__Actinobacteria; o__Actinomycetales; f__Micromonosporaceae; g__Dactylosporangium; s__unidentified_Dactylosporangium
ASV_24513	0.0	0.0	0.0	0.0	33.0	0.0	d__Bacteria; p__Actinobacteria; c__Actinobacteria; o__Actinomycetales; f__Micromonosporaceae; g__Virgisporangium; s__Virgisporangium_ochraceum
ASV_16651	0.0	0.0	0.0	0.0	33.0	0.0	d__Bacteria; p__Firmicutes; c__Clostridia; o__Clostridiales; f__Lachnospiraceae; g__unclassified_Lachnospiraceae; s__unclassified_Lachnospiraceae
ASV_19459	0.0	0.0	0.0	0.0	4.0	5.0	d__Bacteria; p__Firmicutes; c__Clostridia; o__Clostridiales; f__unclassified_Clostridiales; g__unclassified_Clostridiales; s__unclassified_Clostridiales
ASV_10779	0.0	0.0	0.0	0.0	36.0	0.0	d__Bacteria; p__Firmicutes; c__Clostridia; o__Clostridiales; f__Lachnospiraceae; g__Coprococcus; s__unidentified_Coprococcus
ASV_17735	0.0	0.0	0.0	0.0	32.0	0.0	d__Bacteria; p__Actinobacteria; c__Thermoleophilia; o__Gaiellales; f__unidentified_Gaiellales; g__unidentified_Gaiellales; s__unidentified_Gaiellales
ASV_18692	0.0	0.0	0.0	0.0	32.0	0.0	d__Bacteria; p__Actinobacteria; c__Thermoleophilia; o__Gaiellales; f__Gaiellaceae; g__unidentified_Gaiellaceae; s__unidentified_Gaiellaceae
ASV_10076	0.0	0.0	0.0	0.0	37.0	0.0	d__Bacteria; p__Proteobacteria; c__Betaproteobacteria; o__Burkholderiales; f__Comamonadaceae; g__Ramlibacter; s__unidentified_Ramlibacter
ASV_4086	0.0	0.0	0.0	0.0	0.0	29.0	d__Bacteria; p__Firmicutes; c__Bacilli; o__Bacillales; f__Paenibacillaceae; g__Paenibacillus; s__unidentified_Paenibacillus
ASV_8613	0.0	0.0	0.0	0.0	0.0	18.0	d__Bacteria; p__Firmicutes; c__Clostridia; o__Clostridiales; f__unidentified_Clostridiales; g__unidentified_Clostridiales; s__unidentified_Clostridiales
ASV_20718	0.0	0.0	0.0	0.0	0.0	35.0	d__Bacteria; p__Actinobacteria; c__Thermoleophilia; o__Solirubrobacterales; f__unidentified_Solirubrobacterales; g__unidentified_Solirubrobacterales; s__unidentified_Solirubrobacterales
ASV_5189	0.0	0.0	0.0	0.0	0.0	39.0	d__Bacteria; p__Proteobacteria; c__Betaproteobacteria; o__Burkholderiales; f__Comamonadaceae; g__unclassified_Comamonadaceae; s__unclassified_Comamonadaceae
ASV_7977	4.0	0.0	0.0	0.0	0.0	0.0	d__Bacteria; p__Firmicutes; c__Clostridia; o__Clostridiales; f__Lachnospiraceae; g__Coprococcus; s__unidentified_Coprococcus
ASV_17686	39.0	0.0	0.0	0.0	0.0	0.0	d__Bacteria; p__Firmicutes; c__Clostridia; o__Clostridiales; f__Lachnospiraceae; g__unclassified_Lachnospiraceae; s__unclassified_Lachnospiraceae
ASV_3944	0.0	13.0	0.0	0.0	0.0	0.0	d__Bacteria; p__Bacteroidetes; c__Bacteroidia; o__Bacteroidales; f__S24-7; g__unidentified_S24-7; s__unidentified_S24-7
ASV_12243	0.0	39.0	0.0	0.0	0.0	0.0	d__Bacteria; p__Fusobacteria; c__Fusobacteriia; o__Fusobacteriales; f__Fusobacteriaceae; g__Cetobacterium; s__Cetobacterium_somerae
ASV_2269	0.0	0.0	16.0	0.0	16.0	0.0	d__Bacteria; p__Bacteroidetes; c__Bacteroidia; o__Bacteroidales; f__BS11; g__unidentified_BS11; s__unidentified_BS11
ASV_12441	0.0	0.0	13.0	0.0	0.0	0.0	d__Bacteria; p__Firmicutes; c__Clostridia; o__Clostridiales; f__Clostridiaceae; g__Clostridium; s__Clostridium_thermopalmarium
ASV_3496	0.0	0.0	0.0	0.0	13.0	0.0	d__Bacteria; p__Chloroflexi; c__TK17; o__mle1-48; f__unidentified_mle1-48; g__unidentified_mle1-48; s__unidentified_mle1-48
ASV_18536	0.0	0.0	0.0	9.0	0.0	0.0	d__Bacteria; p__Actinobacteria; c__Actinobacteria; o__Actinomycetales; f__Micromonosporaceae; g__Micromonospora; s__unclassified_Micromonospora
ASV_3146	0.0	0.0	0.0	0.0	12.0	0.0	d__Bacteria; p__Firmicutes; c__Clostridia; o__Clostridiales; f__Ruminococcaceae; g__unidentified_Ruminococcaceae; s__unidentified_Ruminococcaceae
ASV_15603	0.0	0.0	0.0	20.0	0.0	0.0	d__Bacteria; p__Firmicutes; c__Clostridia; o__Clostridiales; f__unclassified_Clostridiales; g__unclassified_Clostridiales; s__unclassified_Clostridiales
ASV_24464	0.0	0.0	0.0	28.0	0.0	0.0	d__Bacteria; p__Firmicutes; c__Clostridia; o__Clostridiales; f__Peptostreptococcaceae; g__unidentified_Peptostreptococcaceae; s__unidentified_Peptostreptococcaceae
ASV_16973	0.0	0.0	0.0	20.0	0.0	0.0	d__Bacteria; p__Proteobacteria; c__Alphaproteobacteria; o__Rhodospirillales; f__Rhodospirillaceae; g__unidentified_Rhodospirillaceae; s__unidentified_Rhodospirillaceae
ASV_18005	0.0	0.0	0.0	0.0	20.0	13.0	d__Bacteria; p__Proteobacteria; c__Alphaproteobacteria; o__Rhodobacterales; f__Rhodobacteraceae; g__Paracoccus; s__unclassified_Paracoccus
ASV_19501	0.0	0.0	0.0	21.0	0.0	0.0	d__Bacteria; p__Actinobacteria; c__Actinobacteria; o__Actinomycetales; f__Nocardioidaceae; g__unclassified_Nocardioidaceae; s__unclassified_Nocardioidaceae
ASV_5285	0.0	0.0	0.0	24.0	0.0	0.0	d__Bacteria; p__Gemmatimonadetes; c__Gemmatimonadetes; o__Ellin5290; f__unidentified_Ellin5290; g__unidentified_Ellin5290; s__unidentified_Ellin5290
ASV_13586	0.0	0.0	0.0	22.0	0.0	0.0	d__Bacteria; p__Proteobacteria; c__Betaproteobacteria; o__SC-I-84; f__unidentified_SC-I-84; g__unidentified_SC-I-84; s__unidentified_SC-I-84
ASV_19822	0.0	0.0	0.0	0.0	25.0	0.0	d__Bacteria; p__TM7; c__TM7-1; o__unidentified_TM7-1; f__unidentified_TM7-1; g__unidentified_TM7-1; s__unidentified_TM7-1
ASV_15783	0.0	0.0	0.0	0.0	32.0	0.0	d__Bacteria; p__unclassified_Bacteria; c__unclassified_Bacteria; o__unclassified_Bacteria; f__unclassified_Bacteria; g__unclassified_Bacteria; s__unclassified_Bacteria
ASV_4261	0.0	0.0	0.0	0.0	32.0	0.0	d__Bacteria; p__Proteobacteria; c__Alphaproteobacteria; o__Ellin329; f__unidentified_Ellin329; g__unidentified_Ellin329; s__unidentified_Ellin329
ASV_2761	0.0	0.0	0.0	0.0	32.0	0.0	d__Bacteria; p__Actinobacteria; c__Actinobacteria; o__Actinomycetales; f__Thermomonosporaceae; g__Actinoallomurus; s__unidentified_Actinoallomurus
ASV_12167	0.0	0.0	0.0	0.0	35.0	0.0	d__Bacteria; p__unclassified_Bacteria; c__unclassified_Bacteria; o__unclassified_Bacteria; f__unclassified_Bacteria; g__unclassified_Bacteria; s__unclassified_Bacteria
ASV_21535	0.0	0.0	0.0	0.0	0.0	36.0	d__Bacteria; p__TM7; c__TM7-3; o__I025; f__unidentified_I025; g__unidentified_I025; s__unidentified_I025
ASV_10519	0.0	0.0	0.0	0.0	0.0	25.0	d__Bacteria; p__Firmicutes; c__Bacilli; o__Lactobacillales; f__Lactobacillaceae; g__Lactobacillus; s__Lactobacillus_vaginalis
ASV_11875	0.0	0.0	0.0	0.0	0.0	30.0	d__Bacteria; p__Proteobacteria; c__Alphaproteobacteria; o__Caulobacterales; f__Caulobacteraceae; g__unclassified_Caulobacteraceae; s__unclassified_Caulobacteraceae
ASV_22717	0.0	0.0	0.0	0.0	0.0	30.0	d__Bacteria; p__Planctomycetes; c__Planctomycetia; o__Gemmatales; f__Gemmataceae; g__unidentified_Gemmataceae; s__unidentified_Gemmataceae
ASV_15577	0.0	0.0	0.0	0.0	0.0	28.0	d__Bacteria; p__Actinobacteria; c__Actinobacteria; o__Actinomycetales; f__Micromonosporaceae; g__unclassified_Micromonosporaceae; s__unclassified_Micromonosporaceae
ASV_16282	0.0	0.0	0.0	0.0	0.0	23.0	d__Bacteria; p__Proteobacteria; c__Alphaproteobacteria; o__Rhizobiales; f__Hyphomicrobiaceae; g__Rhodoplanes; s__unidentified_Rhodoplanes
ASV_2565	0.0	0.0	0.0	0.0	0.0	30.0	d__Bacteria; p__Firmicutes; c__Clostridia; o__Clostridiales; f__Veillonellaceae; g__Phascolarctobacterium; s__unidentified_Phascolarctobacterium
ASV_18843	0.0	0.0	0.0	0.0	0.0	34.0	d__Bacteria; p__Proteobacteria; c__Betaproteobacteria; o__Burkholderiales; f__Comamonadaceae; g__Polaromonas; s__unidentified_Polaromonas
ASV_1548	20.0	18.0	0.0	0.0	0.0	0.0	d__Bacteria; p__Firmicutes; c__Clostridia; o__Clostridiales; f__unidentified_Clostridiales; g__unidentified_Clostridiales; s__unidentified_Clostridiales
ASV_13326	0.0	13.0	0.0	15.0	0.0	0.0	d__Bacteria; p__Spirochaetes; c__Spirochaetes; o__Spirochaetales; f__Spirochaetaceae; g__Treponema; s__unidentified_Treponema
ASV_19319	0.0	8.0	0.0	11.0	10.0	0.0	d__Bacteria; p__Firmicutes; c__Clostridia; o__Clostridiales; f__Lachnospiraceae; g__unidentified_Lachnospiraceae; s__unidentified_Lachnospiraceae
ASV_19587	0.0	5.0	0.0	6.0	0.0	6.0	d__Bacteria; p__Proteobacteria; c__Betaproteobacteria; o__Burkholderiales; f__Comamonadaceae; g__Limnobacter; s__unidentified_Limnobacter
ASV_18477	0.0	0.0	5.0	0.0	0.0	4.0	d__Bacteria; p__Firmicutes; c__Clostridia; o__Clostridiales; f__[Mogibacteriaceae]; g__unidentified_[Mogibacteriaceae]; s__unidentified_[Mogibacteriaceae]
ASV_22195	0.0	0.0	12.0	0.0	0.0	23.0	d__Bacteria; p__Proteobacteria; c__Betaproteobacteria; o__Burkholderiales; f__Comamonadaceae; g__Tepidimonas; s__unidentified_Tepidimonas
ASV_6009	0.0	0.0	0.0	0.0	11.0	0.0	d__Bacteria; p__Firmicutes; c__Clostridia; o__Clostridiales; f__Ruminococcaceae; g__unidentified_Ruminococcaceae; s__unidentified_Ruminococcaceae
ASV_16749	0.0	0.0	0.0	4.0	0.0	0.0	d__Bacteria; p__Firmicutes; c__Clostridia; o__Clostridiales; f__Ruminococcaceae; g__unidentified_Ruminococcaceae; s__unidentified_Ruminococcaceae
ASV_21096	0.0	0.0	0.0	22.0	0.0	0.0	d__Bacteria; p__TM7; c__TM7-1; o__unidentified_TM7-1; f__unidentified_TM7-1; g__unidentified_TM7-1; s__unidentified_TM7-1
ASV_1649	0.0	0.0	0.0	10.0	0.0	0.0	d__Bacteria; p__Firmicutes; c__Clostridia; o__Clostridiales; f__Ruminococcaceae; g__unidentified_Ruminococcaceae; s__unidentified_Ruminococcaceae
ASV_12040	0.0	0.0	0.0	14.0	0.0	0.0	d__Bacteria; p__Firmicutes; c__Clostridia; o__Clostridiales; f__unclassified_Clostridiales; g__unclassified_Clostridiales; s__unclassified_Clostridiales
ASV_20934	0.0	0.0	0.0	24.0	0.0	0.0	d__Bacteria; p__Actinobacteria; c__Actinobacteria; o__Actinomycetales; f__Intrasporangiaceae; g__unclassified_Intrasporangiaceae; s__unclassified_Intrasporangiaceae
ASV_24174	0.0	0.0	0.0	20.0	0.0	0.0	d__Bacteria; p__Firmicutes; c__Clostridia; o__Clostridiales; f__Peptostreptococcaceae; g__Proteocatella; s__Proteocatella_sphenisci
ASV_9211	0.0	0.0	0.0	19.0	0.0	0.0	d__Bacteria; p__Proteobacteria; c__Alphaproteobacteria; o__Rhizobiales; f__Bradyrhizobiaceae; g__Bradyrhizobium; s__unidentified_Bradyrhizobium
ASV_3607	0.0	0.0	0.0	22.0	0.0	0.0	d__Bacteria; p__Actinobacteria; c__Actinobacteria; o__Actinomycetales; f__Nocardioidaceae; g__Nocardioides; s__unidentified_Nocardioides
ASV_15081	0.0	0.0	0.0	0.0	35.0	0.0	d__Bacteria; p__Actinobacteria; c__Acidimicrobiia; o__Acidimicrobiales; f__unidentified_Acidimicrobiales; g__unidentified_Acidimicrobiales; s__unidentified_Acidimicrobiales
ASV_1898	0.0	0.0	0.0	0.0	32.0	0.0	d__Bacteria; p__Firmicutes; c__Clostridia; o__Clostridiales; f__Ruminococcaceae; g__Faecalibacterium; s__Faecalibacterium_prausnitzii
ASV_19582	0.0	0.0	0.0	0.0	25.0	0.0	d__Bacteria; p__Proteobacteria; c__Alphaproteobacteria; o__Rhodospirillales; f__Rhodospirillaceae; g__unidentified_Rhodospirillaceae; s__unidentified_Rhodospirillaceae
ASV_8302	0.0	0.0	0.0	0.0	32.0	0.0	d__Bacteria; p__Proteobacteria; c__Alphaproteobacteria; o__Rhizobiales; f__Hyphomicrobiaceae; g__Rhodoplanes; s__unidentified_Rhodoplanes
ASV_19510	0.0	0.0	0.0	0.0	33.0	0.0	d__Bacteria; p__Proteobacteria; c__Gammaproteobacteria; o__Legionellales; f__Legionellaceae; g__unidentified_Legionellaceae; s__unidentified_Legionellaceae
ASV_13725	0.0	0.0	0.0	0.0	30.0	0.0	d__Bacteria; p__Actinobacteria; c__Actinobacteria; o__Actinomycetales; f__unclassified_Actinomycetales; g__unclassified_Actinomycetales; s__unclassified_Actinomycetales
ASV_19804	0.0	0.0	0.0	0.0	0.0	30.0	d__Bacteria; p__Firmicutes; c__Clostridia; o__Clostridiales; f__Peptostreptococcaceae; g__unclassified_Peptostreptococcaceae; s__unclassified_Peptostreptococcaceae
ASV_1855	0.0	0.0	0.0	0.0	0.0	27.0	d__Bacteria; p__Chloroflexi; c__Anaerolineae; o__Caldilineales; f__Caldilineaceae; g__unidentified_Caldilineaceae; s__unidentified_Caldilineaceae
ASV_22860	0.0	0.0	0.0	0.0	0.0	6.0	d__Bacteria; p__Bacteroidetes; c__Bacteroidia; o__Bacteroidales; f__Prevotellaceae; g__Prevotella; s__unidentified_Prevotella
ASV_7035	0.0	0.0	0.0	0.0	0.0	37.0	d__Bacteria; p__Firmicutes; c__Clostridia; o__Clostridiales; f__Clostridiaceae; g__Proteiniclasticum; s__unidentified_Proteiniclasticum
ASV_26363	0.0	0.0	0.0	0.0	0.0	34.0	d__Bacteria; p__Actinobacteria; c__Actinobacteria; o__Actinomycetales; f__Nocardioidaceae; g__Nocardioides; s__unclassified_Nocardioides
ASV_14254	0.0	0.0	0.0	0.0	0.0	32.0	d__Bacteria; p__Actinobacteria; c__Actinobacteria; o__Actinomycetales; f__Micromonosporaceae; g__unclassified_Micromonosporaceae; s__unclassified_Micromonosporaceae
ASV_5137	0.0	0.0	0.0	0.0	0.0	33.0	d__Bacteria; p__Firmicutes; c__Clostridia; o__Clostridiales; f__Clostridiaceae; g__Clostridium; s__Clostridium_celatum
ASV_26105	0.0	0.0	0.0	0.0	0.0	26.0	d__Bacteria; p__Proteobacteria; c__Gammaproteobacteria; o__Legionellales; f__Coxiellaceae; g__unidentified_Coxiellaceae; s__unidentified_Coxiellaceae
ASV_21263	22.0	0.0	0.0	0.0	6.0	0.0	d__Bacteria; p__Bacteroidetes; c__Bacteroidia; o__Bacteroidales; f__Bacteroidaceae; g__Bacteroides; s__Bacteroides_plebeius
ASV_9487	7.0	0.0	0.0	6.0	0.0	0.0	d__Bacteria; p__Bacteroidetes; c__Bacteroidia; o__Bacteroidales; f__[Paraprevotellaceae]; g__CF231; s__unidentified_CF231
ASV_12101	3.0	1.0	15.0	0.0	0.0	1.0	d__Bacteria; p__Bacteroidetes; c__Bacteroidia; o__Bacteroidales; f__Bacteroidaceae; g__Bacteroides; s__unidentified_Bacteroides
ASV_17725	11.0	7.0	0.0	0.0	0.0	12.0	d__Bacteria; p__Firmicutes; c__Clostridia; o__Clostridiales; f__Lachnospiraceae; g__Roseburia; s__unidentified_Roseburia
ASV_16277	2.0	0.0	0.0	0.0	0.0	0.0	d__Bacteria; p__Firmicutes; c__Clostridia; o__Clostridiales; f__Lachnospiraceae; g__Coprococcus; s__unidentified_Coprococcus
ASV_22719	5.0	0.0	16.0	0.0	0.0	0.0	d__Bacteria; p__Proteobacteria; c__Alphaproteobacteria; o__Sphingomonadales; f__Sphingomonadaceae; g__Sphingomonas; s__unclassified_Sphingomonas
ASV_19300	16.0	18.0	0.0	0.0	0.0	0.0	d__Bacteria; p__Firmicutes; c__Clostridia; o__Clostridiales; f__unidentified_Clostridiales; g__unidentified_Clostridiales; s__unidentified_Clostridiales
ASV_25432	0.0	5.0	0.0	4.0	0.0	0.0	d__Bacteria; p__Proteobacteria; c__Alphaproteobacteria; o__Rhizobiales; f__Rhizobiaceae; g__Shinella; s__unidentified_Shinella
ASV_1105	0.0	6.0	8.0	0.0	0.0	0.0	d__Bacteria; p__Firmicutes; c__Clostridia; o__Clostridiales; f__Ruminococcaceae; g__Oscillospira; s__unidentified_Oscillospira
ASV_1609	0.0	0.0	0.0	0.0	0.0	6.0	d__Bacteria; p__Firmicutes; c__Clostridia; o__Clostridiales; f__[Tissierellaceae]; g__Sedimentibacter; s__unidentified_Sedimentibacter
ASV_24617	0.0	0.0	0.0	0.0	0.0	21.0	d__Bacteria; p__Bacteroidetes; c__Sphingobacteriia; o__Sphingobacteriales; f__Sphingobacteriaceae; g__unclassified_Sphingobacteriaceae; s__unclassified_Sphingobacteriaceae
ASV_19803	0.0	0.0	0.0	0.0	20.0	0.0	d__Bacteria; p__Firmicutes; c__Clostridia; o__Clostridiales; f__Ruminococcaceae; g__unidentified_Ruminococcaceae; s__unidentified_Ruminococcaceae
ASV_22373	0.0	0.0	0.0	31.0	0.0	0.0	d__Bacteria; p__Firmicutes; c__Bacilli; o__Bacillales; f__Bacillaceae; g__Bacillus; s__Bacillus_fumarioli
ASV_21292	0.0	0.0	0.0	18.0	1.0	5.0	d__Bacteria; p__Bacteroidetes; c__Flavobacteriia; o__Flavobacteriales; f__Flavobacteriaceae; g__Flavobacterium; s__Flavobacterium_frigidarium
ASV_11424	0.0	0.0	0.0	24.0	0.0	0.0	d__Bacteria; p__Actinobacteria; c__Actinobacteria; o__Actinomycetales; f__Micromonosporaceae; g__unclassified_Micromonosporaceae; s__unclassified_Micromonosporaceae
ASV_5015	0.0	0.0	0.0	27.0	0.0	0.0	d__Bacteria; p__Actinobacteria; c__Actinobacteria; o__Actinomycetales; f__Micromonosporaceae; g__Pilimelia; s__unclassified_Pilimelia
ASV_10056	0.0	0.0	0.0	16.0	0.0	0.0	d__Bacteria; p__Proteobacteria; c__Alphaproteobacteria; o__Rhizobiales; f__Bradyrhizobiaceae; g__unclassified_Bradyrhizobiaceae; s__unclassified_Bradyrhizobiaceae
ASV_8842	0.0	0.0	0.0	16.0	0.0	0.0	d__Bacteria; p__Proteobacteria; c__Betaproteobacteria; o__Nitrosomonadales; f__Nitrosomonadaceae; g__Nitrosovibrio; s__Nitrosovibrio_tenuis
ASV_9031	0.0	0.0	0.0	0.0	30.0	0.0	d__Bacteria; p__Bacteroidetes; c__[Saprospirae]; o__[Saprospirales]; f__Chitinophagaceae; g__unidentified_Chitinophagaceae; s__unidentified_Chitinophagaceae
ASV_6552	0.0	0.0	0.0	0.0	21.0	0.0	d__Bacteria; p__Firmicutes; c__Clostridia; o__Clostridiales; f__Lachnospiraceae; g__unidentified_Lachnospiraceae; s__unidentified_Lachnospiraceae
ASV_2953	0.0	0.0	0.0	0.0	29.0	0.0	d__Bacteria; p__Proteobacteria; c__Alphaproteobacteria; o__Rhodospirillales; f__Acetobacteraceae; g__Roseomonas; s__unidentified_Roseomonas
ASV_6907	0.0	0.0	0.0	0.0	13.0	14.0	d__Bacteria; p__Proteobacteria; c__Gammaproteobacteria; o__Pseudomonadales; f__Moraxellaceae; g__Acinetobacter; s__Acinetobacter_guillouiae
ASV_24578	0.0	0.0	0.0	0.0	24.0	6.0	d__Bacteria; p__Firmicutes; c__Clostridia; o__Clostridiales; f__Ruminococcaceae; g__Oscillospira; s__unidentified_Oscillospira
ASV_20899	0.0	0.0	0.0	0.0	21.0	0.0	d__Bacteria; p__Actinobacteria; c__Acidimicrobiia; o__Acidimicrobiales; f__AKIW874; g__unidentified_AKIW874; s__unidentified_AKIW874
ASV_16087	0.0	0.0	0.0	0.0	27.0	0.0	d__Bacteria; p__Firmicutes; c__Bacilli; o__Bacillales; f__Planococcaceae; g__unclassified_Planococcaceae; s__unclassified_Planococcaceae
ASV_20616	0.0	0.0	0.0	0.0	0.0	9.0	d__Bacteria; p__Bacteroidetes; c__Bacteroidia; o__Bacteroidales; f__BS11; g__unidentified_BS11; s__unidentified_BS11
ASV_7434	0.0	0.0	0.0	0.0	0.0	29.0	d__Bacteria; p__Bacteroidetes; c__Bacteroidia; o__Bacteroidales; f__unidentified_Bacteroidales; g__unidentified_Bacteroidales; s__unidentified_Bacteroidales
ASV_1374	0.0	0.0	0.0	0.0	0.0	25.0	d__Bacteria; p__Actinobacteria; c__Actinobacteria; o__Actinomycetales; f__Nocardioidaceae; g__Nocardioides; s__unidentified_Nocardioides
ASV_9483	0.0	0.0	0.0	0.0	0.0	30.0	d__Bacteria; p__Actinobacteria; c__Actinobacteria; o__Actinomycetales; f__Intrasporangiaceae; g__unclassified_Intrasporangiaceae; s__unclassified_Intrasporangiaceae
ASV_944	0.0	0.0	0.0	0.0	0.0	28.0	d__Bacteria; p__Gemmatimonadetes; c__Gemmatimonadetes; o__Ellin5290; f__unidentified_Ellin5290; g__unidentified_Ellin5290; s__unidentified_Ellin5290
ASV_6176	0.0	0.0	0.0	0.0	0.0	34.0	d__Bacteria; p__Proteobacteria; c__Alphaproteobacteria; o__Rhodospirillales; f__Rhodospirillaceae; g__unidentified_Rhodospirillaceae; s__unidentified_Rhodospirillaceae
ASV_5173	0.0	0.0	0.0	0.0	0.0	29.0	d__Bacteria; p__Proteobacteria; c__Gammaproteobacteria; o__Legionellales; f__unclassified_Legionellales; g__unclassified_Legionellales; s__unclassified_Legionellales
ASV_18313	0.0	0.0	0.0	0.0	0.0	30.0	d__Bacteria; p__Proteobacteria; c__Alphaproteobacteria; o__Rhodospirillales; f__Rhodospirillaceae; g__Reyranella; s__Reyranella_massiliensis
ASV_22462	0.0	0.0	0.0	0.0	0.0	31.0	d__Bacteria; p__Proteobacteria; c__Gammaproteobacteria; o__Pseudomonadales; f__Moraxellaceae; g__Acinetobacter; s__unidentified_Acinetobacter
ASV_15788	0.0	0.0	0.0	0.0	0.0	28.0	d__Bacteria; p__Proteobacteria; c__Alphaproteobacteria; o__Caulobacterales; f__Caulobacteraceae; g__unclassified_Caulobacteraceae; s__unclassified_Caulobacteraceae
ASV_19408	0.0	0.0	0.0	0.0	0.0	30.0	d__Bacteria; p__Proteobacteria; c__Betaproteobacteria; o__Burkholderiales; f__Oxalobacteraceae; g__unclassified_Oxalobacteraceae; s__unclassified_Oxalobacteraceae
ASV_23934	2.0	21.0	9.0	0.0	0.0	0.0	d__Bacteria; p__Firmicutes; c__Clostridia; o__Clostridiales; f__unidentified_Clostridiales; g__unidentified_Clostridiales; s__unidentified_Clostridiales
ASV_10192	26.0	0.0	3.0	2.0	0.0	0.0	d__Bacteria; p__Bacteroidetes; c__Bacteroidia; o__Bacteroidales; f__Bacteroidaceae; g__Bacteroides; s__unidentified_Bacteroides
ASV_20687	8.0	0.0	16.0	0.0	0.0	0.0	d__Bacteria; p__Actinobacteria; c__Coriobacteriia; o__Coriobacteriales; f__Coriobacteriaceae; g__Adlercreutzia; s__unidentified_Adlercreutzia
ASV_17390	1.0	14.0	0.0	0.0	0.0	0.0	d__Bacteria; p__Firmicutes; c__Clostridia; o__Clostridiales; f__Ruminococcaceae; g__Oscillospira; s__unidentified_Oscillospira
ASV_4960	5.0	7.0	0.0	3.0	16.0	1.0	d__Bacteria; p__Firmicutes; c__Clostridia; o__Clostridiales; f__Ruminococcaceae; g__unidentified_Ruminococcaceae; s__unidentified_Ruminococcaceae
ASV_12966	0.0	7.0	8.0	0.0	0.0	0.0	d__Bacteria; p__Firmicutes; c__Clostridia; o__Clostridiales; f__Ruminococcaceae; g__Oscillospira; s__unidentified_Oscillospira
ASV_1727	0.0	10.0	0.0	0.0	0.0	0.0	d__Bacteria; p__Firmicutes; c__Clostridia; o__Clostridiales; f__Ruminococcaceae; g__unidentified_Ruminococcaceae; s__unidentified_Ruminococcaceae
ASV_9708	0.0	30.0	0.0	0.0	0.0	0.0	d__Bacteria; p__Tenericutes; c__Mollicutes; o__RF39; f__unidentified_RF39; g__unidentified_RF39; s__unidentified_RF39
ASV_16133	0.0	0.0	26.0	8.0	0.0	0.0	d__Bacteria; p__Bacteroidetes; c__Bacteroidia; o__Bacteroidales; f__S24-7; g__unidentified_S24-7; s__unidentified_S24-7
ASV_25468	0.0	0.0	0.0	0.0	0.0	7.0	d__Bacteria; p__Firmicutes; c__Clostridia; o__Clostridiales; f__Ruminococcaceae; g__Oscillospira; s__unidentified_Oscillospira
ASV_15721	0.0	0.0	0.0	0.0	0.0	9.0	d__Bacteria; p__Bacteroidetes; c__Sphingobacteriia; o__Sphingobacteriales; f__Sphingobacteriaceae; g__unidentified_Sphingobacteriaceae; s__unidentified_Sphingobacteriaceae
ASV_22185	0.0	0.0	0.0	0.0	0.0	10.0	d__Bacteria; p__Actinobacteria; c__Actinobacteria; o__Micrococcales; f__unidentified_Micrococcales; g__unidentified_Micrococcales; s__unidentified_Micrococcales
ASV_5781	0.0	0.0	0.0	11.0	0.0	0.0	d__Bacteria; p__Proteobacteria; c__Alphaproteobacteria; o__Rhizobiales; f__Hyphomicrobiaceae; g__Rhodoplanes; s__unidentified_Rhodoplanes
ASV_6588	0.0	0.0	0.0	0.0	25.0	0.0	d__Bacteria; p__Proteobacteria; c__Gammaproteobacteria; o__Oceanospirillales; f__Oceanospirillaceae; g__Marinomonas; s__Marinomonas_primoryensis
ASV_14996	0.0	0.0	0.0	5.0	0.0	0.0	d__Bacteria; p__Firmicutes; c__Clostridia; o__Clostridiales; f__Ruminococcaceae; g__Ruminococcus; s__unidentified_Ruminococcus
ASV_43	0.0	0.0	0.0	10.0	0.0	0.0	d__Bacteria; p__Firmicutes; c__Clostridia; o__Clostridiales; f__Lachnospiraceae; g__unidentified_Lachnospiraceae; s__unidentified_Lachnospiraceae
ASV_6576	0.0	0.0	0.0	16.0	0.0	0.0	d__Bacteria; p__Firmicutes; c__Clostridia; o__Clostridiales; f__Lachnospiraceae; g__unidentified_Lachnospiraceae; s__unidentified_Lachnospiraceae
ASV_1805	0.0	0.0	0.0	22.0	0.0	0.0	d__Bacteria; p__Actinobacteria; c__Actinobacteria; o__Actinomycetales; f__unclassified_Actinomycetales; g__unclassified_Actinomycetales; s__unclassified_Actinomycetales
ASV_8151	0.0	0.0	0.0	20.0	0.0	0.0	d__Bacteria; p__Actinobacteria; c__Actinobacteria; o__Actinomycetales; f__Nocardioidaceae; g__Nocardioides; s__unclassified_Nocardioides
ASV_9723	0.0	0.0	0.0	10.0	0.0	0.0	d__Bacteria; p__Firmicutes; c__Clostridia; o__Clostridiales; f__unclassified_Clostridiales; g__unclassified_Clostridiales; s__unclassified_Clostridiales
ASV_3472	0.0	0.0	0.0	21.0	0.0	0.0	d__Bacteria; p__Proteobacteria; c__Gammaproteobacteria; o__Legionellales; f__Legionellaceae; g__unclassified_Legionellaceae; s__unclassified_Legionellaceae
ASV_14650	0.0	0.0	0.0	19.0	0.0	0.0	d__Bacteria; p__Actinobacteria; c__MB-A2-108; o__0319-7L14; f__unidentified_0319-7L14; g__unidentified_0319-7L14; s__unidentified_0319-7L14
ASV_19124	0.0	0.0	0.0	0.0	39.0	0.0	d__Bacteria; p__Firmicutes; c__Clostridia; o__Clostridiales; f__[Acidaminobacteraceae]; g__Fusibacter; s__unidentified_Fusibacter
ASV_5851	0.0	0.0	0.0	0.0	28.0	0.0	d__Bacteria; p__Actinobacteria; c__Thermoleophilia; o__Gaiellales; f__Gaiellaceae; g__unidentified_Gaiellaceae; s__unidentified_Gaiellaceae
ASV_22492	0.0	0.0	0.0	0.0	28.0	0.0	d__Bacteria; p__Proteobacteria; c__Alphaproteobacteria; o__Rhizobiales; f__unidentified_Rhizobiales; g__unidentified_Rhizobiales; s__unidentified_Rhizobiales
ASV_22142	0.0	0.0	0.0	0.0	32.0	0.0	d__Bacteria; p__Acidobacteria; c__Acidobacteria-6; o__iii1-15; f__RB40; g__unidentified_RB40; s__unidentified_RB40
ASV_13399	0.0	0.0	0.0	0.0	30.0	0.0	d__Bacteria; p__[Thermi]; c__Deinococci; o__Deinococcales; f__Trueperaceae; g__B-42; s__unidentified_B-42
ASV_14469	0.0	0.0	0.0	0.0	0.0	31.0	d__Bacteria; p__Firmicutes; c__Bacilli; o__Bacillales; f__Planococcaceae; g__unclassified_Planococcaceae; s__unclassified_Planococcaceae
ASV_23923	0.0	0.0	0.0	0.0	0.0	32.0	d__Bacteria; p__Bacteroidetes; c__Bacteroidia; o__Bacteroidales; f__S24-7; g__unidentified_S24-7; s__unidentified_S24-7
ASV_7746	0.0	0.0	0.0	0.0	0.0	11.0	d__Bacteria; p__Firmicutes; c__Clostridia; o__Clostridiales; f__Clostridiaceae; g__Clostridium; s__unclassified_Clostridium
ASV_7884	0.0	0.0	0.0	0.0	0.0	27.0	d__Bacteria; p__Proteobacteria; c__Gammaproteobacteria; o__Pseudomonadales; f__Moraxellaceae; g__Acinetobacter; s__Acinetobacter_lwoffii
ASV_12995	0.0	0.0	0.0	0.0	0.0	26.0	d__Bacteria; p__Actinobacteria; c__Actinobacteria; o__Actinomycetales; f__Intrasporangiaceae; g__unclassified_Intrasporangiaceae; s__unclassified_Intrasporangiaceae
ASV_3518	0.0	0.0	0.0	0.0	0.0	23.0	d__Bacteria; p__Proteobacteria; c__Gammaproteobacteria; o__Legionellales; f__Legionellaceae; g__Legionella; s__unclassified_Legionella
ASV_13881	0.0	0.0	0.0	0.0	0.0	28.0	d__Bacteria; p__Proteobacteria; c__Betaproteobacteria; o__Burkholderiales; f__Burkholderiaceae; g__Burkholderia; s__unidentified_Burkholderia
ASV_20794	0.0	0.0	0.0	0.0	0.0	30.0	d__Bacteria; p__OD1; c__unidentified_OD1; o__unidentified_OD1; f__unidentified_OD1; g__unidentified_OD1; s__unidentified_OD1
ASV_3283	18.0	18.0	0.0	0.0	0.0	0.0	d__Bacteria; p__Bacteroidetes; c__Bacteroidia; o__Bacteroidales; f__S24-7; g__unidentified_S24-7; s__unidentified_S24-7
ASV_23138	6.0	0.0	0.0	0.0	0.0	20.0	d__Bacteria; p__Firmicutes; c__Clostridia; o__Clostridiales; f__Ruminococcaceae; g__unidentified_Ruminococcaceae; s__unidentified_Ruminococcaceae
ASV_9080	9.0	0.0	0.0	7.0	0.0	16.0	d__Bacteria; p__Firmicutes; c__Clostridia; o__Clostridiales; f__Ruminococcaceae; g__Ruminococcus; s__unidentified_Ruminococcus
ASV_3512	0.0	7.0	0.0	0.0	0.0	0.0	d__Bacteria; p__Firmicutes; c__Clostridia; o__Clostridiales; f__unidentified_Clostridiales; g__unidentified_Clostridiales; s__unidentified_Clostridiales
ASV_23985	0.0	0.0	43.0	0.0	0.0	0.0	d__Bacteria; p__Proteobacteria; c__Gammaproteobacteria; o__Legionellales; f__Legionellaceae; g__unclassified_Legionellaceae; s__unclassified_Legionellaceae
ASV_8640	0.0	0.0	22.0	0.0	0.0	0.0	d__Bacteria; p__Firmicutes; c__Clostridia; o__Clostridiales; f__Veillonellaceae; g__Phascolarctobacterium; s__unidentified_Phascolarctobacterium
ASV_22454	0.0	0.0	0.0	17.0	0.0	0.0	d__Bacteria; p__Firmicutes; c__Clostridia; o__Clostridiales; f__Ruminococcaceae; g__unidentified_Ruminococcaceae; s__unidentified_Ruminococcaceae
ASV_26109	0.0	0.0	0.0	6.0	0.0	4.0	d__Bacteria; p__Bacteroidetes; c__Bacteroidia; o__Bacteroidales; f__S24-7; g__unidentified_S24-7; s__unidentified_S24-7
ASV_9676	0.0	0.0	0.0	6.0	0.0	0.0	d__Bacteria; p__Firmicutes; c__Clostridia; o__Clostridiales; f__Lachnospiraceae; g__unidentified_Lachnospiraceae; s__unidentified_Lachnospiraceae
ASV_17891	0.0	0.0	0.0	0.0	11.0	0.0	d__Bacteria; p__Gemmatimonadetes; c__Gemmatimonadetes; o__Gemmatimonadales; f__Ellin5301; g__unidentified_Ellin5301; s__unidentified_Ellin5301
ASV_259	0.0	0.0	0.0	20.0	0.0	0.0	d__Bacteria; p__Chloroflexi; c__unclassified_Chloroflexi; o__unclassified_Chloroflexi; f__unclassified_Chloroflexi; g__unclassified_Chloroflexi; s__unclassified_Chloroflexi
ASV_17692	0.0	0.0	0.0	23.0	0.0	0.0	d__Bacteria; p__Bacteroidetes; c__Flavobacteriia; o__Flavobacteriales; f__Flavobacteriaceae; g__Flavobacterium; s__Flavobacterium_frigidarium
ASV_21600	0.0	0.0	0.0	18.0	0.0	0.0	d__Bacteria; p__Actinobacteria; c__Actinobacteria; o__Actinomycetales; f__Propionibacteriaceae; g__Microlunatus; s__Microlunatus_panaciterrae
ASV_354	0.0	0.0	0.0	19.0	0.0	0.0	d__Bacteria; p__Actinobacteria; c__Actinobacteria; o__Actinomycetales; f__Micromonosporaceae; g__Dactylosporangium; s__unidentified_Dactylosporangium
ASV_8832	0.0	0.0	0.0	28.0	0.0	0.0	d__Bacteria; p__Actinobacteria; c__Actinobacteria; o__Actinomycetales; f__Thermomonosporaceae; g__Actinoallomurus; s__Actinoallomurus_iriomotensis
ASV_17962	0.0	0.0	0.0	23.0	0.0	0.0	d__Bacteria; p__Actinobacteria; c__Actinobacteria; o__Actinomycetales; f__Nocardioidaceae; g__unidentified_Nocardioidaceae; s__unidentified_Nocardioidaceae
ASV_5747	0.0	0.0	0.0	24.0	0.0	0.0	d__Bacteria; p__Proteobacteria; c__Alphaproteobacteria; o__Rhizobiales; f__Hyphomicrobiaceae; g__Rhodoplanes; s__unidentified_Rhodoplanes
ASV_25730	0.0	0.0	0.0	0.0	28.0	0.0	d__Bacteria; p__Bacteroidetes; c__[Saprospirae]; o__[Saprospirales]; f__Saprospiraceae; g__unidentified_Saprospiraceae; s__unidentified_Saprospiraceae
ASV_24281	0.0	0.0	0.0	0.0	26.0	0.0	d__Bacteria; p__Firmicutes; c__Bacilli; o__Bacillales; f__Planococcaceae; g__Sporosarcina; s__unidentified_Sporosarcina
ASV_12072	0.0	0.0	0.0	0.0	16.0	10.0	d__Bacteria; p__Verrucomicrobia; c__[Pedosphaerae]; o__[Pedosphaerales]; f__unidentified_[Pedosphaerales]; g__unidentified_[Pedosphaerales]; s__unidentified_[Pedosphaerales]
ASV_5016	0.0	0.0	0.0	0.0	27.0	0.0	d__Bacteria; p__Bacteroidetes; c__Flavobacteriia; o__Flavobacteriales; f__Flavobacteriaceae; g__Flavobacterium; s__unidentified_Flavobacterium
ASV_13800	0.0	0.0	0.0	0.0	27.0	0.0	d__Bacteria; p__Firmicutes; c__Clostridia; o__Clostridiales; f__Peptostreptococcaceae; g__Tepidibacter; s__unidentified_Tepidibacter
ASV_10846	0.0	0.0	0.0	0.0	31.0	0.0	d__Bacteria; p__Actinobacteria; c__Actinobacteria; o__Actinomycetales; f__Micromonosporaceae; g__unclassified_Micromonosporaceae; s__unclassified_Micromonosporaceae
ASV_8547	0.0	0.0	0.0	0.0	14.0	10.0	d__Bacteria; p__Firmicutes; c__Clostridia; o__Clostridiales; f__Lachnospiraceae; g__Coprococcus; s__unidentified_Coprococcus
ASV_15536	0.0	0.0	0.0	0.0	31.0	0.0	d__Bacteria; p__unidentified_Bacteria; c__unidentified_Bacteria; o__unidentified_Bacteria; f__unidentified_Bacteria; g__unidentified_Bacteria; s__unidentified_Bacteria
ASV_19936	0.0	0.0	0.0	0.0	30.0	0.0	d__Bacteria; p__Actinobacteria; c__Actinobacteria; o__Actinomycetales; f__Thermomonosporaceae; g__Actinoallomurus; s__Actinoallomurus_iriomotensis
ASV_26299	0.0	0.0	0.0	0.0	23.0	0.0	d__Bacteria; p__Firmicutes; c__Clostridia; o__Clostridiales; f__Ruminococcaceae; g__Butyricicoccus; s__Butyricicoccus_pullicaecorum
ASV_8083	0.0	0.0	0.0	0.0	31.0	0.0	d__Bacteria; p__Proteobacteria; c__Gammaproteobacteria; o__Xanthomonadales; f__Xanthomonadaceae; g__Dyella; s__unclassified_Dyella
ASV_24746	0.0	0.0	0.0	0.0	28.0	0.0	d__Bacteria; p__Proteobacteria; c__Alphaproteobacteria; o__Rhizobiales; f__Phyllobacteriaceae; g__Mesorhizobium; s__unidentified_Mesorhizobium
ASV_9968	0.0	0.0	0.0	0.0	31.0	0.0	d__Bacteria; p__Proteobacteria; c__Gammaproteobacteria; o__Xanthomonadales; f__Xanthomonadaceae; g__unclassified_Xanthomonadaceae; s__unclassified_Xanthomonadaceae
ASV_13716	0.0	0.0	0.0	0.0	29.0	0.0	d__Bacteria; p__Firmicutes; c__Clostridia; o__Clostridiales; f__unidentified_Clostridiales; g__unidentified_Clostridiales; s__unidentified_Clostridiales
ASV_17516	0.0	0.0	0.0	0.0	31.0	0.0	d__Bacteria; p__Proteobacteria; c__Betaproteobacteria; o__Burkholderiales; f__Comamonadaceae; g__Rhodoferax; s__unidentified_Rhodoferax
ASV_3876	0.0	0.0	0.0	0.0	26.0	0.0	d__Bacteria; p__Proteobacteria; c__Betaproteobacteria; o__Burkholderiales; f__Burkholderiaceae; g__Burkholderia; s__unidentified_Burkholderia
ASV_13349	0.0	0.0	0.0	0.0	31.0	0.0	d__Bacteria; p__Firmicutes; c__Clostridia; o__Clostridiales; f__unidentified_Clostridiales; g__unidentified_Clostridiales; s__unidentified_Clostridiales
ASV_2200	0.0	0.0	0.0	0.0	0.0	24.0	d__Bacteria; p__TM7; c__TM7-3; o__I025; f__unidentified_I025; g__unidentified_I025; s__unidentified_I025
ASV_16773	0.0	0.0	0.0	0.0	0.0	31.0	d__Bacteria; p__Actinobacteria; c__Actinobacteria; o__Actinomycetales; f__Streptomycetaceae; g__unclassified_Streptomycetaceae; s__unclassified_Streptomycetaceae
ASV_11547	0.0	0.0	0.0	0.0	0.0	27.0	d__Bacteria; p__Actinobacteria; c__Actinobacteria; o__Actinomycetales; f__Nocardioidaceae; g__Nocardioides; s__unclassified_Nocardioides
ASV_5942	0.0	0.0	0.0	0.0	0.0	31.0	d__Bacteria; p__Proteobacteria; c__Alphaproteobacteria; o__Rhodospirillales; f__Rhodospirillaceae; g__unidentified_Rhodospirillaceae; s__unidentified_Rhodospirillaceae
[truncated: 9,225 more rows]
