# Supplementary material for: Modulation of the gut microbiota by processed food and natural food: evidence from the Siniperca chuatsi microbiome
Source: PeerJ journal article supplement (doi:10.7717/peerj.17520), 2024-06-14
Supplement: RawData.7z [file taxonomy.xls]

#Feature ID	taxonomy	Confidence
ASV_1	d__Bacteria;p__Gemmatimonadetes;c__Gemmatimonadetes;o__N1423WL;f__unidentified_N1423WL;g__unidentified_N1423WL;s__unidentified_N1423WL	0.9999999947453375
ASV_2	d__Bacteria;p__Firmicutes;c__Bacilli;o__Bacillales;f__Staphylococcaceae;g__Jeotgalicoccus;s__Jeotgalicoccus_psychrophilus	0.9528999097180008
ASV_3	d__Bacteria;p__Proteobacteria;c__Gammaproteobacteria;o__Pseudomonadales;f__Moraxellaceae;g__Acinetobacter;s__unidentified_Acinetobacter	0.998986473935119
ASV_4	d__Bacteria;p__Bacteroidetes;c__Bacteroidia;o__Bacteroidales;f__Prevotellaceae;g__Prevotella;s__unidentified_Prevotella	0.9998040010036623
ASV_5	d__Bacteria;p__Firmicutes;c__Clostridia;o__Clostridiales;f__Lachnospiraceae;g__Epulopiscium;s__unidentified_Epulopiscium	0.9999862570428959
ASV_6	d__Bacteria;p__Firmicutes;c__Clostridia;o__Clostridiales;f__Lachnospiraceae;g__unidentified_Lachnospiraceae;s__unidentified_Lachnospiraceae	0.8017342998522479
ASV_7	d__Bacteria;p__Firmicutes;c__Bacilli;o__Turicibacterales;f__Turicibacteraceae;g__Turicibacter;s__unidentified_Turicibacter	0.9999999520106553
ASV_8	d__Bacteria;p__Proteobacteria;c__Alphaproteobacteria;o__Rhizobiales;f__Bradyrhizobiaceae;g__Balneimonas;s__unidentified_Balneimonas	0.9999955233284811
ASV_9	d__Bacteria;p__Firmicutes;c__Clostridia;o__Clostridiales;f__Ruminococcaceae;g__Ruminococcus;s__unidentified_Ruminococcus	0.8995339558334859
ASV_10	d__Bacteria;p__Bacteroidetes;c__Bacteroidia;o__Bacteroidales;f__Bacteroidaceae;g__Bacteroides;s__unidentified_Bacteroides	0.9305756046609047
ASV_11	d__Bacteria;p__Spirochaetes;c__Spirochaetes;o__Spirochaetales;f__Spirochaetaceae;g__Treponema;s__unidentified_Treponema	0.9999999552812834
ASV_12	d__Bacteria;p__Firmicutes;c__Clostridia;o__Clostridiales;f__Lachnospiraceae;g__unclassified_Lachnospiraceae;s__unclassified_Lachnospiraceae	0.976581145611918
ASV_13	d__Bacteria;p__Firmicutes;c__Clostridia;o__Clostridiales;f__unclassified_Clostridiales;g__unclassified_Clostridiales;s__unclassified_Clostridiales	0.9999999987950563
ASV_14	d__Bacteria;p__Proteobacteria;c__Gammaproteobacteria;o__Enterobacteriales;f__Enterobacteriaceae;g__unclassified_Enterobacteriaceae;s__unclassified_Enterobacteriaceae	0.9999442347037318
ASV_15	d__Bacteria;p__Firmicutes;c__Clostridia;o__Clostridiales;f__unidentified_Clostridiales;g__unidentified_Clostridiales;s__unidentified_Clostridiales	0.8251121221989989
ASV_16	d__Bacteria;p__Cyanobacteria;c__Synechococcophycideae;o__Pseudanabaenales;f__Pseudanabaenaceae;g__Nodosilinea;s__Nodosilinea_nodulosa	0.8691594729668836
ASV_17	d__Bacteria;p__Bacteroidetes;c__Bacteroidia;o__Bacteroidales;f__unidentified_Bacteroidales;g__unidentified_Bacteroidales;s__unidentified_Bacteroidales	0.967063542753819
ASV_18	d__Bacteria;p__Proteobacteria;c__Deltaproteobacteria;o__Bdellovibrionales;f__Bdellovibrionaceae;g__Bdellovibrio;s__unidentified_Bdellovibrio	0.9999751293902585
ASV_19	d__Bacteria;p__Firmicutes;c__Clostridia;o__Clostridiales;f__Lachnospiraceae;g__unidentified_Lachnospiraceae;s__unidentified_Lachnospiraceae	0.7681551371424923
ASV_20	d__Bacteria;p__Proteobacteria;c__Alphaproteobacteria;o__Rhizobiales;f__Rhizobiaceae;g__unclassified_Rhizobiaceae;s__unclassified_Rhizobiaceae	0.9979769068221862
ASV_21	d__Bacteria;p__Actinobacteria;c__Acidimicrobiia;o__Acidimicrobiales;f__C111;g__unidentified_C111;s__unidentified_C111	0.9997068591911223
ASV_22	d__Bacteria;p__Bacteroidetes;c__Bacteroidia;o__Bacteroidales;f__Prevotellaceae;g__Prevotella;s__unidentified_Prevotella	0.9999418588525034
ASV_23	d__Bacteria;p__unclassified_Bacteria;c__unclassified_Bacteria;o__unclassified_Bacteria;f__unclassified_Bacteria;g__unclassified_Bacteria;s__unclassified_Bacteria	0.9999999999999591
ASV_24	d__Bacteria;p__unidentified_Bacteria;c__unidentified_Bacteria;o__unidentified_Bacteria;f__unidentified_Bacteria;g__unidentified_Bacteria;s__unidentified_Bacteria	0.837295741626371
ASV_25	d__Bacteria;p__Firmicutes;c__Clostridia;o__Clostridiales;f__Lachnospiraceae;g__unidentified_Lachnospiraceae;s__unidentified_Lachnospiraceae	0.948373911831383
ASV_26	d__Bacteria;p__Bacteroidetes;c__Bacteroidia;o__Bacteroidales;f__S24-7;g__unidentified_S24-7;s__unidentified_S24-7	0.9999990337019377
ASV_27	d__Bacteria;p__Bacteroidetes;c__Bacteroidia;o__Bacteroidales;f__S24-7;g__unidentified_S24-7;s__unidentified_S24-7	0.9999999001935912
ASV_28	d__Bacteria;p__Firmicutes;c__Bacilli;o__Lactobacillales;f__Lactobacillaceae;g__Lactobacillus;s__Lactobacillus_paraplantarum	0.7366430087228096
ASV_29	d__Bacteria;p__Bacteroidetes;c__Bacteroidia;o__Bacteroidales;f__Rikenellaceae;g__Alistipes;s__Alistipes_indistinctus	0.9947368670143907
ASV_30	d__Bacteria;p__Firmicutes;c__Clostridia;o__Clostridiales;f__Ruminococcaceae;g__Ruminococcus;s__unidentified_Ruminococcus	0.9984681584779048
ASV_31	d__Bacteria;p__Firmicutes;c__Clostridia;o__Clostridiales;f__unidentified_Clostridiales;g__unidentified_Clostridiales;s__unidentified_Clostridiales	0.9245495773680883
ASV_32	d__Bacteria;p__Firmicutes;c__Clostridia;o__Clostridiales;f__unidentified_Clostridiales;g__unidentified_Clostridiales;s__unidentified_Clostridiales	0.9865029198895137
ASV_33	d__Bacteria;p__Firmicutes;c__Bacilli;o__Bacillales;f__Paenibacillaceae;g__Paenibacillus;s__unclassified_Paenibacillus	0.8975484620273425
ASV_34	d__Bacteria;p__Firmicutes;c__Clostridia;o__Clostridiales;f__Lachnospiraceae;g__unidentified_Lachnospiraceae;s__unidentified_Lachnospiraceae	0.9703412515178063
ASV_35	d__Bacteria;p__Firmicutes;c__Clostridia;o__Clostridiales;f__Lachnospiraceae;g__unclassified_Lachnospiraceae;s__unclassified_Lachnospiraceae	0.7371966961179972
ASV_36	d__Bacteria;p__Bacteroidetes;c__Bacteroidia;o__Bacteroidales;f__unclassified_Bacteroidales;g__unclassified_Bacteroidales;s__unclassified_Bacteroidales	0.9999979358415445
ASV_37	d__Bacteria;p__Firmicutes;c__Clostridia;o__Clostridiales;f__Lachnospiraceae;g__unclassified_Lachnospiraceae;s__unclassified_Lachnospiraceae	0.7903317851466787
ASV_38	d__Bacteria;p__Tenericutes;c__Mollicutes;o__RF39;f__unidentified_RF39;g__unidentified_RF39;s__unidentified_RF39	0.9986314458563299
ASV_39	d__Bacteria;p__Proteobacteria;c__Gammaproteobacteria;o__Pseudomonadales;f__Pseudomonadaceae;g__Pseudomonas;s__unclassified_Pseudomonas	0.994176586269774
ASV_40	d__Bacteria;p__Chloroflexi;c__TK10;o__B07_WMSP1;f__FFCH4570;g__unidentified_FFCH4570;s__unidentified_FFCH4570	0.9995350757468568
ASV_41	d__Bacteria;p__Proteobacteria;c__Alphaproteobacteria;o__unidentified_Alphaproteobacteria;f__unidentified_Alphaproteobacteria;g__unidentified_Alphaproteobacteria;s__unidentified_Alphaproteobacteria	0.9579244891570241
ASV_42	d__Bacteria;p__Proteobacteria;c__Gammaproteobacteria;o__Enterobacteriales;f__Enterobacteriaceae;g__Shigella;s__unclassified_Shigella	0.8167003206998682
ASV_43	d__Bacteria;p__Firmicutes;c__Clostridia;o__Clostridiales;f__Lachnospiraceae;g__unidentified_Lachnospiraceae;s__unidentified_Lachnospiraceae	0.8886590176591675
ASV_44	d__Bacteria;p__Firmicutes;c__Bacilli;o__Bacillales;f__Bacillaceae;g__Bacillus;s__unclassified_Bacillus	0.9181516313839282
ASV_45	d__Bacteria;p__Proteobacteria;c__Gammaproteobacteria;o__Enterobacteriales;f__Enterobacteriaceae;g__unclassified_Enterobacteriaceae;s__unclassified_Enterobacteriaceae	0.9991513836757459
ASV_46	d__Bacteria;p__Proteobacteria;c__Gammaproteobacteria;o__Pseudomonadales;f__Pseudomonadaceae;g__Pseudomonas;s__unclassified_Pseudomonas	0.967577271995602
ASV_47	d__Bacteria;p__Firmicutes;c__Clostridia;o__Clostridiales;f__Ruminococcaceae;g__Ruminococcus;s__unidentified_Ruminococcus	0.9950550729555118
ASV_48	d__Bacteria;p__Firmicutes;c__Clostridia;o__Clostridiales;f__unidentified_Clostridiales;g__unidentified_Clostridiales;s__unidentified_Clostridiales	0.7531624136110064
ASV_49	d__Bacteria;p__Proteobacteria;c__Alphaproteobacteria;o__unclassified_Alphaproteobacteria;f__unclassified_Alphaproteobacteria;g__unclassified_Alphaproteobacteria;s__unclassified_Alphaproteobacteria	0.831789357018883
ASV_50	d__Bacteria;p__Firmicutes;c__Clostridia;o__Clostridiales;f__unidentified_Clostridiales;g__unidentified_Clostridiales;s__unidentified_Clostridiales	0.9976065110709897
ASV_51	d__Bacteria;p__Proteobacteria;c__Betaproteobacteria;o__Burkholderiales;f__Comamonadaceae;g__unclassified_Comamonadaceae;s__unclassified_Comamonadaceae	0.7700845993493461
ASV_52	d__Bacteria;p__Firmicutes;c__Bacilli;o__Lactobacillales;f__Lactobacillaceae;g__unclassified_Lactobacillaceae;s__unclassified_Lactobacillaceae	0.9609491142048376
ASV_53	d__Bacteria;p__Proteobacteria;c__Gammaproteobacteria;o__Aeromonadales;f__Aeromonadaceae;g__Aeromonas;s__unclassified_Aeromonas	0.9805319603779877
ASV_54	d__Bacteria;p__Firmicutes;c__Clostridia;o__Clostridiales;f__Ruminococcaceae;g__unidentified_Ruminococcaceae;s__unidentified_Ruminococcaceae	0.8191221816037517
ASV_55	d__Bacteria;p__Firmicutes;c__Clostridia;o__Clostridiales;f__Peptostreptococcaceae;g__unidentified_Peptostreptococcaceae;s__unidentified_Peptostreptococcaceae	0.8673505399210251
ASV_56	d__Bacteria;p__Actinobacteria;c__Actinobacteria;o__Micrococcales;f__unidentified_Micrococcales;g__unidentified_Micrococcales;s__unidentified_Micrococcales	0.9999979211416993
ASV_57	d__Bacteria;p__Actinobacteria;c__Actinobacteria;o__Actinomycetales;f__Corynebacteriaceae;g__Corynebacterium;s__unidentified_Corynebacterium	0.982305493560154
ASV_58	d__Bacteria;p__unidentified_Bacteria;c__unidentified_Bacteria;o__unidentified_Bacteria;f__unidentified_Bacteria;g__unidentified_Bacteria;s__unidentified_Bacteria	0.704155002935211
ASV_59	d__Bacteria;p__Actinobacteria;c__Thermoleophilia;o__Gaiellales;f__Gaiellaceae;g__unidentified_Gaiellaceae;s__unidentified_Gaiellaceae	0.9999111907519659
ASV_60	d__Bacteria;p__Firmicutes;c__Clostridia;o__Clostridiales;f__Ruminococcaceae;g__Oscillospira;s__unidentified_Oscillospira	0.9988510510850953
ASV_61	d__Bacteria;p__Actinobacteria;c__Actinobacteria;o__Actinomycetales;f__Micrococcaceae;g__Arthrobacter;s__unclassified_Arthrobacter	0.9369873151703376
ASV_62	d__Bacteria;p__Proteobacteria;c__Gammaproteobacteria;o__Enterobacteriales;f__Enterobacteriaceae;g__unclassified_Enterobacteriaceae;s__unclassified_Enterobacteriaceae	0.9999999543865273
ASV_63	d__Bacteria;p__unclassified_Bacteria;c__unclassified_Bacteria;o__unclassified_Bacteria;f__unclassified_Bacteria;g__unclassified_Bacteria;s__unclassified_Bacteria	0.9999999988026541
ASV_64	d__Bacteria;p__Firmicutes;c__Bacilli;o__Bacillales;f__unclassified_Bacillales;g__unclassified_Bacillales;s__unclassified_Bacillales	0.9999972193745059
ASV_65	d__Bacteria;p__Bacteroidetes;c__Bacteroidia;o__Bacteroidales;f__[Paraprevotellaceae];g__[Prevotella];s__unidentified_[Prevotella]	0.9998135830482786
ASV_66	d__Bacteria;p__Proteobacteria;c__Betaproteobacteria;o__Burkholderiales;f__Comamonadaceae;g__Acidovorax;s__Acidovorax_delafieldii	0.7057823217098016
ASV_67	d__Bacteria;p__Proteobacteria;c__Gammaproteobacteria;o__unclassified_Gammaproteobacteria;f__unclassified_Gammaproteobacteria;g__unclassified_Gammaproteobacteria;s__unclassified_Gammaproteobacteria	0.8763289814850183
ASV_68	d__Bacteria;p__Proteobacteria;c__Alphaproteobacteria;o__unidentified_Alphaproteobacteria;f__unidentified_Alphaproteobacteria;g__unidentified_Alphaproteobacteria;s__unidentified_Alphaproteobacteria	0.8625567941419824
ASV_69	d__Bacteria;p__Actinobacteria;c__Actinobacteria;o__Actinomycetales;f__unclassified_Actinomycetales;g__unclassified_Actinomycetales;s__unclassified_Actinomycetales	0.9238078240496743
ASV_70	d__Bacteria;p__Firmicutes;c__Clostridia;o__Clostridiales;f__unidentified_Clostridiales;g__unidentified_Clostridiales;s__unidentified_Clostridiales	0.9850375446855134
ASV_71	d__Bacteria;p__Proteobacteria;c__Alphaproteobacteria;o__Rhizobiales;f__Methylobacteriaceae;g__unclassified_Methylobacteriaceae;s__unclassified_Methylobacteriaceae	0.9999709219105561
ASV_72	d__Bacteria;p__Proteobacteria;c__Deltaproteobacteria;o__Syntrophobacterales;f__Syntrophobacteraceae;g__unidentified_Syntrophobacteraceae;s__unidentified_Syntrophobacteraceae	0.9999921579963845
ASV_73	d__Bacteria;p__Firmicutes;c__Clostridia;o__Clostridiales;f__Ruminococcaceae;g__Oscillospira;s__unidentified_Oscillospira	0.9996948161869931
ASV_74	d__Bacteria;p__Firmicutes;c__Erysipelotrichi;o__Erysipelotrichales;f__Erysipelotrichaceae;g__unclassified_Erysipelotrichaceae;s__unclassified_Erysipelotrichaceae	0.9950278096529237
ASV_75	d__Bacteria;p__Firmicutes;c__Clostridia;o__Clostridiales;f__Ruminococcaceae;g__Oscillospira;s__unidentified_Oscillospira	0.9980063339065305
ASV_76	d__Bacteria;p__Firmicutes;c__Clostridia;o__Clostridiales;f__unidentified_Clostridiales;g__unidentified_Clostridiales;s__unidentified_Clostridiales	0.9984664143158647
ASV_77	d__Bacteria;p__Firmicutes;c__Clostridia;o__Clostridiales;f__Ruminococcaceae;g__unidentified_Ruminococcaceae;s__unidentified_Ruminococcaceae	0.9604256803361014
ASV_78	d__Bacteria;p__Firmicutes;c__Clostridia;o__Clostridiales;f__unidentified_Clostridiales;g__unidentified_Clostridiales;s__unidentified_Clostridiales	0.7591430471463091
ASV_79	d__Bacteria;p__unidentified_Bacteria;c__unidentified_Bacteria;o__unidentified_Bacteria;f__unidentified_Bacteria;g__unidentified_Bacteria;s__unidentified_Bacteria	0.852940278552245
ASV_80	d__Bacteria;p__Firmicutes;c__Clostridia;o__Clostridiales;f__Clostridiaceae;g__Clostridium;s__unidentified_Clostridium	0.987027138209176
ASV_81	d__Bacteria;p__Proteobacteria;c__Betaproteobacteria;o__Neisseriales;f__Neisseriaceae;g__Neisseria;s__unclassified_Neisseria	0.9929428995641016
ASV_82	d__Bacteria;p__Proteobacteria;c__Gammaproteobacteria;o__Enterobacteriales;f__Enterobacteriaceae;g__Proteus;s__unclassified_Proteus	0.9997742269564113
ASV_83	d__Bacteria;p__Proteobacteria;c__Alphaproteobacteria;o__Rhodospirillales;f__Rhodospirillaceae;g__Azospirillum;s__Azospirillum_massiliensis	0.9422544710477307
ASV_84	d__Bacteria;p__Proteobacteria;c__Alphaproteobacteria;o__Rhizobiales;f__Bradyrhizobiaceae;g__unclassified_Bradyrhizobiaceae;s__unclassified_Bradyrhizobiaceae	0.9997793444830791
ASV_85	d__Bacteria;p__Proteobacteria;c__Gammaproteobacteria;o__Enterobacteriales;f__Enterobacteriaceae;g__unclassified_Enterobacteriaceae;s__unclassified_Enterobacteriaceae	0.9994041553808083
ASV_86	d__Bacteria;p__Proteobacteria;c__Betaproteobacteria;o__Burkholderiales;f__Comamonadaceae;g__unclassified_Comamonadaceae;s__unclassified_Comamonadaceae	0.9989237767813292
ASV_87	d__Bacteria;p__Gemmatimonadetes;c__Gemmatimonadetes;o__unidentified_Gemmatimonadetes;f__unidentified_Gemmatimonadetes;g__unidentified_Gemmatimonadetes;s__unidentified_Gemmatimonadetes	0.9952935796556793
ASV_88	d__Bacteria;p__Acidobacteria;c__Acidobacteriia;o__Acidobacteriales;f__Koribacteraceae;g__Candidatus_Koribacter;s__unidentified_Candidatus_Koribacter	0.9988701321001222
ASV_89	d__Bacteria;p__Firmicutes;c__Clostridia;o__Clostridiales;f__Ruminococcaceae;g__Ruminococcus;s__unidentified_Ruminococcus	0.9985370910750982
ASV_90	d__Bacteria;p__Proteobacteria;c__Betaproteobacteria;o__Burkholderiales;f__Comamonadaceae;g__unclassified_Comamonadaceae;s__unclassified_Comamonadaceae	0.9974617528089432
ASV_91	d__Bacteria;p__Bacteroidetes;c__Bacteroidia;o__Bacteroidales;f__unidentified_Bacteroidales;g__unidentified_Bacteroidales;s__unidentified_Bacteroidales	0.9530579809472826
ASV_92	d__Bacteria;p__Firmicutes;c__Clostridia;o__Clostridiales;f__Ruminococcaceae;g__Oscillospira;s__unidentified_Oscillospira	0.9997176575238638
ASV_93	d__Bacteria;p__Proteobacteria;c__Gammaproteobacteria;o__Pseudomonadales;f__Moraxellaceae;g__Psychrobacter;s__Psychrobacter_sanguinis	0.7746912835034534
ASV_94	d__Bacteria;p__Proteobacteria;c__Alphaproteobacteria;o__Sphingomonadales;f__Sphingomonadaceae;g__Kaistobacter;s__unidentified_Kaistobacter	0.9911541369097782
ASV_95	d__Bacteria;p__Firmicutes;c__Clostridia;o__Clostridiales;f__Ruminococcaceae;g__unidentified_Ruminococcaceae;s__unidentified_Ruminococcaceae	0.9247092433401948
ASV_96	d__Bacteria;p__Firmicutes;c__Clostridia;o__Clostridiales;f__Ruminococcaceae;g__Oscillospira;s__unidentified_Oscillospira	0.999316017318245
ASV_97	d__Bacteria;p__Actinobacteria;c__Actinobacteria;o__Actinomycetales;f__Microbacteriaceae;g__unclassified_Microbacteriaceae;s__unclassified_Microbacteriaceae	0.9999985620446401
ASV_98	d__Bacteria;p__Firmicutes;c__Clostridia;o__Clostridiales;f__unidentified_Clostridiales;g__unidentified_Clostridiales;s__unidentified_Clostridiales	0.9998282648564055
ASV_99	d__Bacteria;p__Firmicutes;c__Clostridia;o__Clostridiales;f__Clostridiaceae;g__Proteiniclasticum;s__unidentified_Proteiniclasticum	0.9954495849241848
ASV_100	d__Bacteria;p__Bacteroidetes;c__Bacteroidia;o__Bacteroidales;f__Bacteroidaceae;g__Bacteroides;s__unclassified_Bacteroides	0.9999999970274907
ASV_101	d__Bacteria;p__Proteobacteria;c__Alphaproteobacteria;o__Rhizobiales;f__unclassified_Rhizobiales;g__unclassified_Rhizobiales;s__unclassified_Rhizobiales	0.8364024775665273
ASV_102	d__Bacteria;p__Firmicutes;c__Clostridia;o__Clostridiales;f__unclassified_Clostridiales;g__unclassified_Clostridiales;s__unclassified_Clostridiales	0.9999999927045146
ASV_103	d__Bacteria;p__Firmicutes;c__Clostridia;o__Clostridiales;f__unidentified_Clostridiales;g__unidentified_Clostridiales;s__unidentified_Clostridiales	0.8108139278184595
ASV_104	d__Bacteria;p__Firmicutes;c__Clostridia;o__Clostridiales;f__Clostridiaceae;g__unidentified_Clostridiaceae;s__unidentified_Clostridiaceae	0.9246960085327974
ASV_105	d__Bacteria;p__Firmicutes;c__Clostridia;o__Clostridiales;f__[Mogibacteriaceae];g__unidentified_[Mogibacteriaceae];s__unidentified_[Mogibacteriaceae]	0.9999849098239229
ASV_106	d__Bacteria;p__Bacteroidetes;c__Bacteroidia;o__Bacteroidales;f__[Paraprevotellaceae];g__CF231;s__unidentified_CF231	0.9974303982651975
ASV_107	d__Bacteria;p__Tenericutes;c__Mollicutes;o__RF39;f__unidentified_RF39;g__unidentified_RF39;s__unidentified_RF39	0.9999721419803509
ASV_108	d__Bacteria;p__Proteobacteria;c__Gammaproteobacteria;o__Pseudomonadales;f__Moraxellaceae;g__Acinetobacter;s__Acinetobacter_rhizosphaerae	0.8241763922999371
ASV_109	d__Bacteria;p__Bacteroidetes;c__Flavobacteriia;o__Flavobacteriales;f__[Weeksellaceae];g__Chryseobacterium;s__unidentified_Chryseobacterium	0.9990053974237706
ASV_110	d__Bacteria;p__Bacteroidetes;c__Bacteroidia;o__Bacteroidales;f__S24-7;g__unidentified_S24-7;s__unidentified_S24-7	0.9999512376609078
ASV_111	d__Bacteria;p__Actinobacteria;c__Actinobacteria;o__Actinomycetales;f__Microbacteriaceae;g__unidentified_Microbacteriaceae;s__unidentified_Microbacteriaceae	0.7825129946866105
ASV_112	d__Bacteria;p__Firmicutes;c__Clostridia;o__Clostridiales;f__Lachnospiraceae;g__unidentified_Lachnospiraceae;s__unidentified_Lachnospiraceae	0.7510809212997744
ASV_113	d__Bacteria;p__Proteobacteria;c__Gammaproteobacteria;o__HOC36;f__unidentified_HOC36;g__unidentified_HOC36;s__unidentified_HOC36	0.9999702966488456
ASV_114	d__Bacteria;p__Firmicutes;c__Bacilli;o__Lactobacillales;f__Lactobacillaceae;g__Lactobacillus;s__Lactobacillus_hamsteri	0.8493572795992105
ASV_115	d__Bacteria;p__Armatimonadetes;c__Chthonomonadetes;o__Chthonomonadales;f__Chthonomonadaceae;g__unidentified_Chthonomonadaceae;s__unidentified_Chthonomonadaceae	0.9995044891475553
ASV_116	d__Bacteria;p__Firmicutes;c__Clostridia;o__Clostridiales;f__unidentified_Clostridiales;g__unidentified_Clostridiales;s__unidentified_Clostridiales	0.9823520037638973
ASV_117	d__Bacteria;p__Tenericutes;c__Mollicutes;o__RF39;f__unidentified_RF39;g__unidentified_RF39;s__unidentified_RF39	0.9999999989499315
ASV_118	d__Bacteria;p__Firmicutes;c__Clostridia;o__Clostridiales;f__Ruminococcaceae;g__Oscillospira;s__unidentified_Oscillospira	0.9950737084413702
ASV_119	d__Bacteria;p__Proteobacteria;c__Gammaproteobacteria;o__Enterobacteriales;f__Enterobacteriaceae;g__unclassified_Enterobacteriaceae;s__unclassified_Enterobacteriaceae	0.8839471436284289
ASV_120	d__Bacteria;p__Firmicutes;c__Clostridia;o__Clostridiales;f__Peptostreptococcaceae;g__unclassified_Peptostreptococcaceae;s__unclassified_Peptostreptococcaceae	0.9395114528325654
ASV_121	d__Bacteria;p__Firmicutes;c__Clostridia;o__Clostridiales;f__Ruminococcaceae;g__Ruminococcus;s__unidentified_Ruminococcus	0.9345379876566402
ASV_122	d__Bacteria;p__Firmicutes;c__Clostridia;o__Clostridiales;f__unidentified_Clostridiales;g__unidentified_Clostridiales;s__unidentified_Clostridiales	0.9615206563727289
ASV_123	d__Bacteria;p__unidentified_Bacteria;c__unidentified_Bacteria;o__unidentified_Bacteria;f__unidentified_Bacteria;g__unidentified_Bacteria;s__unidentified_Bacteria	0.7139810146030584
ASV_124	d__Bacteria;p__Firmicutes;c__Clostridia;o__Clostridiales;f__unidentified_Clostridiales;g__unidentified_Clostridiales;s__unidentified_Clostridiales	0.7688942912310888
ASV_125	d__Bacteria;p__Firmicutes;c__Clostridia;o__Clostridiales;f__Lachnospiraceae;g__unidentified_Lachnospiraceae;s__unidentified_Lachnospiraceae	0.945268403592671
ASV_126	d__Bacteria;p__Firmicutes;c__Clostridia;o__Clostridiales;f__unidentified_Clostridiales;g__unidentified_Clostridiales;s__unidentified_Clostridiales	0.9205023991614361
ASV_127	d__Bacteria;p__Firmicutes;c__Bacilli;o__Bacillales;f__Planococcaceae;g__unclassified_Planococcaceae;s__unclassified_Planococcaceae	0.9999929609418992
ASV_128	d__Bacteria;p__unidentified_Bacteria;c__unidentified_Bacteria;o__unidentified_Bacteria;f__unidentified_Bacteria;g__unidentified_Bacteria;s__unidentified_Bacteria	0.934058337947209
ASV_129	d__Bacteria;p__Proteobacteria;c__Alphaproteobacteria;o__Rhizobiales;f__Bradyrhizobiaceae;g__unclassified_Bradyrhizobiaceae;s__unclassified_Bradyrhizobiaceae	0.9999984187481079
ASV_130	d__Bacteria;p__Bacteroidetes;c__Bacteroidia;o__Bacteroidales;f__S24-7;g__unidentified_S24-7;s__unidentified_S24-7	0.9321053651700719
ASV_131	d__Bacteria;p__Bacteroidetes;c__Bacteroidia;o__Bacteroidales;f__unidentified_Bacteroidales;g__unidentified_Bacteroidales;s__unidentified_Bacteroidales	0.9994667949867613
ASV_132	d__Bacteria;p__Firmicutes;c__Clostridia;o__Clostridiales;f__unidentified_Clostridiales;g__unidentified_Clostridiales;s__unidentified_Clostridiales	0.8833970839868546
ASV_133	d__Bacteria;p__Proteobacteria;c__Gammaproteobacteria;o__Pseudomonadales;f__Moraxellaceae;g__unclassified_Moraxellaceae;s__unclassified_Moraxellaceae	0.7362363365340056
ASV_134	d__Bacteria;p__Firmicutes;c__Clostridia;o__Clostridiales;f__unidentified_Clostridiales;g__unidentified_Clostridiales;s__unidentified_Clostridiales	0.9438703125059094
ASV_135	d__Bacteria;p__Firmicutes;c__Clostridia;o__Clostridiales;f__Lachnospiraceae;g__unidentified_Lachnospiraceae;s__unidentified_Lachnospiraceae	0.801365145235067
ASV_136	d__Bacteria;p__Firmicutes;c__Erysipelotrichi;o__Erysipelotrichales;f__Erysipelotrichaceae;g__unidentified_Erysipelotrichaceae;s__unidentified_Erysipelotrichaceae	0.9920326347926312
ASV_137	d__Bacteria;p__Bacteroidetes;c__VC2_1_Bac22;o__unidentified_VC2_1_Bac22;f__unidentified_VC2_1_Bac22;g__unidentified_VC2_1_Bac22;s__unidentified_VC2_1_Bac22	0.9999716264186712
ASV_138	d__Bacteria;p__Firmicutes;c__Clostridia;o__Clostridiales;f__unclassified_Clostridiales;g__unclassified_Clostridiales;s__unclassified_Clostridiales	0.9999999999169853
ASV_139	d__Bacteria;p__unclassified_Bacteria;c__unclassified_Bacteria;o__unclassified_Bacteria;f__unclassified_Bacteria;g__unclassified_Bacteria;s__unclassified_Bacteria	0.9999999999999867
ASV_140	d__Bacteria;p__OP8;c__OP8_1;o__unidentified_OP8_1;f__unidentified_OP8_1;g__unidentified_OP8_1;s__unidentified_OP8_1	0.9999846905423422
ASV_141	d__Bacteria;p__Firmicutes;c__Clostridia;o__Clostridiales;f__Veillonellaceae;g__Megasphaera;s__unidentified_Megasphaera	0.9999440158086375
ASV_142	d__Bacteria;p__Proteobacteria;c__Deltaproteobacteria;o__Bdellovibrionales;f__Bdellovibrionaceae;g__Bdellovibrio;s__Bdellovibrio_bacteriovorus	0.9996486177935987
ASV_143	d__Bacteria;p__Firmicutes;c__Clostridia;o__Clostridiales;f__Dehalobacteriaceae;g__unidentified_Dehalobacteriaceae;s__unidentified_Dehalobacteriaceae	0.9999371606189902
ASV_144	d__Bacteria;p__Proteobacteria;c__Alphaproteobacteria;o__Rhizobiales;f__unclassified_Rhizobiales;g__unclassified_Rhizobiales;s__unclassified_Rhizobiales	0.9401458324019258
ASV_145	d__Bacteria;p__Firmicutes;c__Clostridia;o__Clostridiales;f__Ruminococcaceae;g__Oscillospira;s__unidentified_Oscillospira	0.99839719879442
ASV_146	d__Bacteria;p__Firmicutes;c__Clostridia;o__Clostridiales;f__Lachnospiraceae;g__Clostridium;s__Clostridium_citroniae	0.8130084911861227
ASV_147	d__Bacteria;p__Proteobacteria;c__Deltaproteobacteria;o__Desulfovibrionales;f__Desulfovibrionaceae;g__Bilophila;s__unidentified_Bilophila	0.9998644183468901
ASV_148	d__Bacteria;p__Firmicutes;c__Clostridia;o__Clostridiales;f__Lachnospiraceae;g__unidentified_Lachnospiraceae;s__unidentified_Lachnospiraceae	0.8218534175274296
ASV_149	d__Bacteria;p__Actinobacteria;c__Coriobacteriia;o__Coriobacteriales;f__Coriobacteriaceae;g__Adlercreutzia;s__unidentified_Adlercreutzia	0.8324539266392709
ASV_150	d__Bacteria;p__Firmicutes;c__Clostridia;o__Clostridiales;f__unidentified_Clostridiales;g__unidentified_Clostridiales;s__unidentified_Clostridiales	0.9999057262865267
ASV_151	d__Bacteria;p__Firmicutes;c__Clostridia;o__Clostridiales;f__Clostridiaceae;g__unclassified_Clostridiaceae;s__unclassified_Clostridiaceae	0.9999715188883982
ASV_152	d__Bacteria;p__Firmicutes;c__Clostridia;o__Clostridiales;f__unidentified_Clostridiales;g__unidentified_Clostridiales;s__unidentified_Clostridiales	0.777362620995451
ASV_153	d__Bacteria;p__Bacteroidetes;c__Bacteroidia;o__Bacteroidales;f__Prevotellaceae;g__Prevotella;s__unidentified_Prevotella	0.9629543934608168
ASV_154	d__Bacteria;p__Actinobacteria;c__Actinobacteria;o__Actinomycetales;f__Streptomycetaceae;g__unclassified_Streptomycetaceae;s__unclassified_Streptomycetaceae	0.9986594780708066
ASV_155	d__Bacteria;p__Fusobacteria;c__Fusobacteriia;o__Fusobacteriales;f__Fusobacteriaceae;g__Cetobacterium;s__unidentified_Cetobacterium	0.8550994728758005
ASV_156	d__Bacteria;p__Bacteroidetes;c__Bacteroidia;o__Bacteroidales;f__S24-7;g__unidentified_S24-7;s__unidentified_S24-7	0.9999726291767
ASV_157	d__Bacteria;p__Firmicutes;c__Clostridia;o__Clostridiales;f__Peptostreptococcaceae;g__[Clostridium];s__unclassified_[Clostridium]	0.8109598112717644
ASV_158	d__Bacteria;p__Proteobacteria;c__Alphaproteobacteria;o__unidentified_Alphaproteobacteria;f__unidentified_Alphaproteobacteria;g__unidentified_Alphaproteobacteria;s__unidentified_Alphaproteobacteria	0.8782739463739834
ASV_159	d__Bacteria;p__Bacteroidetes;c__Bacteroidia;o__Bacteroidales;f__S24-7;g__unidentified_S24-7;s__unidentified_S24-7	0.9999990444040084
ASV_160	d__Bacteria;p__Bacteroidetes;c__Bacteroidia;o__Bacteroidales;f__S24-7;g__unidentified_S24-7;s__unidentified_S24-7	0.9999993063016025
ASV_161	d__Bacteria;p__Gemmatimonadetes;c__Gemmatimonadetes;o__Ellin5290;f__unidentified_Ellin5290;g__unidentified_Ellin5290;s__unidentified_Ellin5290	0.957120202615655
ASV_162	d__Bacteria;p__Firmicutes;c__Bacilli;o__Lactobacillales;f__Lactobacillaceae;g__Pediococcus;s__unclassified_Pediococcus	0.9447647581299559
ASV_163	d__Bacteria;p__Proteobacteria;c__Betaproteobacteria;o__Burkholderiales;f__unclassified_Burkholderiales;g__unclassified_Burkholderiales;s__unclassified_Burkholderiales	0.9659716136137405
ASV_164	d__Bacteria;p__Proteobacteria;c__Gammaproteobacteria;o__Pseudomonadales;f__Moraxellaceae;g__Psychrobacter;s__unidentified_Psychrobacter	0.9977587393969127
ASV_165	d__Bacteria;p__Bacteroidetes;c__Bacteroidia;o__Bacteroidales;f__S24-7;g__unidentified_S24-7;s__unidentified_S24-7	0.999999690727483
ASV_166	d__Bacteria;p__Firmicutes;c__Clostridia;o__Clostridiales;f__Clostridiaceae;g__unidentified_Clostridiaceae;s__unidentified_Clostridiaceae	0.9355666904015592
ASV_167	d__Bacteria;p__Bacteroidetes;c__Bacteroidia;o__Bacteroidales;f__Bacteroidaceae;g__Bacteroides;s__Bacteroides_acidifaciens	0.7565751096018292
ASV_168	d__Bacteria;p__Proteobacteria;c__Gammaproteobacteria;o__Enterobacteriales;f__Enterobacteriaceae;g__unclassified_Enterobacteriaceae;s__unclassified_Enterobacteriaceae	0.9999998959989422
ASV_169	d__Bacteria;p__Proteobacteria;c__Gammaproteobacteria;o__Legionellales;f__unidentified_Legionellales;g__unidentified_Legionellales;s__unidentified_Legionellales	0.8302765486134103
ASV_170	d__Bacteria;p__Proteobacteria;c__Gammaproteobacteria;o__Xanthomonadales;f__Xanthomonadaceae;g__unclassified_Xanthomonadaceae;s__unclassified_Xanthomonadaceae	0.9861534370852436
ASV_171	d__Bacteria;p__Firmicutes;c__Clostridia;o__Clostridiales;f__Ruminococcaceae;g__unidentified_Ruminococcaceae;s__unidentified_Ruminococcaceae	0.9896621602300898
ASV_172	d__Bacteria;p__Proteobacteria;c__Betaproteobacteria;o__Rhodocyclales;f__Rhodocyclaceae;g__unclassified_Rhodocyclaceae;s__unclassified_Rhodocyclaceae	0.9310082474694745
ASV_173	d__Bacteria;p__Firmicutes;c__Clostridia;o__Clostridiales;f__unidentified_Clostridiales;g__unidentified_Clostridiales;s__unidentified_Clostridiales	0.9448827155857443
ASV_174	d__Bacteria;p__Proteobacteria;c__Gammaproteobacteria;o__Enterobacteriales;f__Enterobacteriaceae;g__unclassified_Enterobacteriaceae;s__unclassified_Enterobacteriaceae	0.9870581796219677
ASV_175	d__Bacteria;p__Firmicutes;c__Clostridia;o__Clostridiales;f__Ruminococcaceae;g__unidentified_Ruminococcaceae;s__unidentified_Ruminococcaceae	0.9948917135601593
ASV_176	d__Bacteria;p__Firmicutes;c__Clostridia;o__Clostridiales;f__unidentified_Clostridiales;g__unidentified_Clostridiales;s__unidentified_Clostridiales	0.9092776033195784
ASV_177	d__Bacteria;p__Firmicutes;c__Erysipelotrichi;o__Erysipelotrichales;f__Erysipelotrichaceae;g__unidentified_Erysipelotrichaceae;s__unidentified_Erysipelotrichaceae	0.8002322820810673
ASV_178	d__Bacteria;p__Bacteroidetes;c__Bacteroidia;o__Bacteroidales;f__unidentified_Bacteroidales;g__unidentified_Bacteroidales;s__unidentified_Bacteroidales	0.9996516725985469
ASV_179	d__Bacteria;p__Proteobacteria;c__Alphaproteobacteria;o__Rhodobacterales;f__Rhodobacteraceae;g__Rhodobacter;s__unidentified_Rhodobacter	0.9920259646694284
ASV_180	d__Bacteria;p__GAL15;c__unidentified_GAL15;o__unidentified_GAL15;f__unidentified_GAL15;g__unidentified_GAL15;s__unidentified_GAL15	0.9999999307745522
ASV_181	d__Bacteria;p__Proteobacteria;c__Betaproteobacteria;o__Burkholderiales;f__Comamonadaceae;g__unclassified_Comamonadaceae;s__unclassified_Comamonadaceae	0.9998749522978019
ASV_182	d__Bacteria;p__Actinobacteria;c__Actinobacteria;o__Actinomycetales;f__Nocardioidaceae;g__Nocardioides;s__unclassified_Nocardioides	0.9830440556822064
ASV_183	d__Bacteria;p__unidentified_Bacteria;c__unidentified_Bacteria;o__unidentified_Bacteria;f__unidentified_Bacteria;g__unidentified_Bacteria;s__unidentified_Bacteria	0.9208233357891332
ASV_184	d__Bacteria;p__Bacteroidetes;c__Bacteroidia;o__Bacteroidales;f__S24-7;g__unidentified_S24-7;s__unidentified_S24-7	0.9999999519534992
ASV_185	d__Bacteria;p__Proteobacteria;c__Betaproteobacteria;o__Burkholderiales;f__Comamonadaceae;g__unclassified_Comamonadaceae;s__unclassified_Comamonadaceae	0.8928575453196435
ASV_186	d__Bacteria;p__Actinobacteria;c__Actinobacteria;o__Actinomycetales;f__Nocardioidaceae;g__unidentified_Nocardioidaceae;s__unidentified_Nocardioidaceae	0.9355438514715169
ASV_187	d__Bacteria;p__Firmicutes;c__Clostridia;o__Clostridiales;f__unidentified_Clostridiales;g__unidentified_Clostridiales;s__unidentified_Clostridiales	0.9768995979880741
ASV_188	d__Bacteria;p__Firmicutes;c__Clostridia;o__Clostridiales;f__unclassified_Clostridiales;g__unclassified_Clostridiales;s__unclassified_Clostridiales	0.9999992448401547
ASV_189	d__Bacteria;p__Firmicutes;c__Clostridia;o__Clostridiales;f__Ruminococcaceae;g__unidentified_Ruminococcaceae;s__unidentified_Ruminococcaceae	0.9919693156454243
ASV_190	d__Bacteria;p__Proteobacteria;c__Betaproteobacteria;o__Burkholderiales;f__Comamonadaceae;g__Rubrivivax;s__unidentified_Rubrivivax	0.7523937715296014
ASV_191	d__Bacteria;p__Proteobacteria;c__Alphaproteobacteria;o__Rickettsiales;f__unidentified_Rickettsiales;g__unidentified_Rickettsiales;s__unidentified_Rickettsiales	0.9992122334081424
ASV_192	d__Bacteria;p__Proteobacteria;c__Betaproteobacteria;o__Burkholderiales;f__Comamonadaceae;g__Schlegelella;s__unidentified_Schlegelella	0.9942754766429578
ASV_193	d__Bacteria;p__Firmicutes;c__Clostridia;o__Clostridiales;f__unidentified_Clostridiales;g__unidentified_Clostridiales;s__unidentified_Clostridiales	0.9987680403437955
ASV_194	d__Bacteria;p__Firmicutes;c__Clostridia;o__Clostridiales;f__unidentified_Clostridiales;g__unidentified_Clostridiales;s__unidentified_Clostridiales	0.9027030337824733
ASV_195	d__Bacteria;p__unclassified_Bacteria;c__unclassified_Bacteria;o__unclassified_Bacteria;f__unclassified_Bacteria;g__unclassified_Bacteria;s__unclassified_Bacteria	0.9999999999942489
ASV_196	d__Bacteria;p__Synergistetes;c__Synergistia;o__Synergistales;f__Aminiphilaceae;g__Aminiphilus;s__unidentified_Aminiphilus	0.9999996778512873
ASV_197	d__Bacteria;p__Actinobacteria;c__Actinobacteria;o__Actinomycetales;f__Nocardioidaceae;g__unidentified_Nocardioidaceae;s__unidentified_Nocardioidaceae	0.9479040717316356
ASV_198	d__Bacteria;p__Firmicutes;c__Clostridia;o__Clostridiales;f__unclassified_Clostridiales;g__unclassified_Clostridiales;s__unclassified_Clostridiales	0.9281418879378294
ASV_199	d__Bacteria;p__Firmicutes;c__Clostridia;o__Clostridiales;f__Lachnospiraceae;g__unidentified_Lachnospiraceae;s__unidentified_Lachnospiraceae	0.9376020218680973
ASV_200	d__Bacteria;p__Proteobacteria;c__Gammaproteobacteria;o__unclassified_Gammaproteobacteria;f__unclassified_Gammaproteobacteria;g__unclassified_Gammaproteobacteria;s__unclassified_Gammaproteobacteria	0.9999798541891323
ASV_201	d__Bacteria;p__Firmicutes;c__Clostridia;o__Clostridiales;f__Clostridiaceae;g__Proteiniclasticum;s__unidentified_Proteiniclasticum	0.9998530379168271
ASV_202	d__Bacteria;p__Firmicutes;c__Clostridia;o__Clostridiales;f__Lachnospiraceae;g__unidentified_Lachnospiraceae;s__unidentified_Lachnospiraceae	0.8302719619470811
ASV_203	d__Bacteria;p__Firmicutes;c__Bacilli;o__Lactobacillales;f__unclassified_Lactobacillales;g__unclassified_Lactobacillales;s__unclassified_Lactobacillales	0.7098771937361579
ASV_204	d__Bacteria;p__Firmicutes;c__Bacilli;o__Lactobacillales;f__Lactobacillaceae;g__unclassified_Lactobacillaceae;s__unclassified_Lactobacillaceae	0.9966623631730029
ASV_205	d__Bacteria;p__Proteobacteria;c__Gammaproteobacteria;o__unclassified_Gammaproteobacteria;f__unclassified_Gammaproteobacteria;g__unclassified_Gammaproteobacteria;s__unclassified_Gammaproteobacteria	0.9999999532773286
ASV_206	d__Bacteria;p__Firmicutes;c__Bacilli;o__Bacillales;f__Bacillaceae;g__Bacillus;s__unclassified_Bacillus	0.8451918966827844
ASV_207	d__Bacteria;p__Proteobacteria;c__Gammaproteobacteria;o__Pseudomonadales;f__Moraxellaceae;g__Acinetobacter;s__unidentified_Acinetobacter	0.9835175346531511
ASV_208	d__Bacteria;p__Firmicutes;c__Clostridia;o__Clostridiales;f__Ruminococcaceae;g__unidentified_Ruminococcaceae;s__unidentified_Ruminococcaceae	0.9991917846840133
ASV_209	d__Bacteria;p__Actinobacteria;c__Actinobacteria;o__Actinomycetales;f__Intrasporangiaceae;g__unclassified_Intrasporangiaceae;s__unclassified_Intrasporangiaceae	0.8251818825694435
ASV_210	d__Bacteria;p__Firmicutes;c__Clostridia;o__Clostridiales;f__unidentified_Clostridiales;g__unidentified_Clostridiales;s__unidentified_Clostridiales	0.8261923790051974
ASV_211	d__Bacteria;p__Bacteroidetes;c__Bacteroidia;o__Bacteroidales;f__unidentified_Bacteroidales;g__unidentified_Bacteroidales;s__unidentified_Bacteroidales	0.9384694322919105
ASV_212	d__Bacteria;p__Proteobacteria;c__Epsilonproteobacteria;o__Campylobacterales;f__Campylobacteraceae;g__Campylobacter;s__unidentified_Campylobacter	0.9979091655896278
ASV_213	d__Bacteria;p__Proteobacteria;c__Gammaproteobacteria;o__Pseudomonadales;f__Moraxellaceae;g__Acinetobacter;s__unidentified_Acinetobacter	0.8474610865655967
ASV_214	d__Bacteria;p__Actinobacteria;c__Actinobacteria;o__Actinomycetales;f__unidentified_Actinomycetales;g__unidentified_Actinomycetales;s__unidentified_Actinomycetales	0.916162801472599
ASV_215	d__Bacteria;p__Firmicutes;c__Clostridia;o__Clostridiales;f__Lachnospiraceae;g__unidentified_Lachnospiraceae;s__unidentified_Lachnospiraceae	0.8033267048494128
ASV_216	d__Bacteria;p__Bacteroidetes;c__Bacteroidia;o__Bacteroidales;f__S24-7;g__unidentified_S24-7;s__unidentified_S24-7	0.9999993277992573
ASV_217	d__Bacteria;p__Firmicutes;c__Clostridia;o__Clostridiales;f__Peptostreptococcaceae;g__Proteocatella;s__Proteocatella_sphenisci	0.9997389612368281
ASV_218	d__Bacteria;p__Actinobacteria;c__Thermoleophilia;o__Solirubrobacterales;f__Solirubrobacteraceae;g__Solirubrobacter;s__unidentified_Solirubrobacter	0.9558391597288326
ASV_219	d__Bacteria;p__unclassified_Bacteria;c__unclassified_Bacteria;o__unclassified_Bacteria;f__unclassified_Bacteria;g__unclassified_Bacteria;s__unclassified_Bacteria	0.9999999999725664
ASV_220	d__Bacteria;p__Firmicutes;c__Bacilli;o__Bacillales;f__unclassified_Bacillales;g__unclassified_Bacillales;s__unclassified_Bacillales	0.9999908171349442
ASV_221	d__Bacteria;p__Firmicutes;c__Clostridia;o__Clostridiales;f__unidentified_Clostridiales;g__unidentified_Clostridiales;s__unidentified_Clostridiales	0.9199679368251851
ASV_222	d__Bacteria;p__Firmicutes;c__Clostridia;o__Clostridiales;f__unidentified_Clostridiales;g__unidentified_Clostridiales;s__unidentified_Clostridiales	0.9972823816769115
ASV_223	d__Bacteria;p__Proteobacteria;c__Alphaproteobacteria;o__Rhodospirillales;f__Acetobacteraceae;g__unidentified_Acetobacteraceae;s__unidentified_Acetobacteraceae	0.987012972149075
ASV_224	d__Bacteria;p__Firmicutes;c__Clostridia;o__Clostridiales;f__unclassified_Clostridiales;g__unclassified_Clostridiales;s__unclassified_Clostridiales	0.9912379242235386
ASV_225	d__Bacteria;p__Firmicutes;c__Clostridia;o__Clostridiales;f__unidentified_Clostridiales;g__unidentified_Clostridiales;s__unidentified_Clostridiales	0.8466725444764859
ASV_226	d__Bacteria;p__Bacteroidetes;c__Bacteroidia;o__Bacteroidales;f__S24-7;g__unidentified_S24-7;s__unidentified_S24-7	0.9999929135480399
ASV_227	d__Bacteria;p__Firmicutes;c__Bacilli;o__Lactobacillales;f__Lactobacillaceae;g__Pediococcus;s__unclassified_Pediococcus	0.9040338050580488
ASV_228	d__Bacteria;p__Firmicutes;c__Clostridia;o__Clostridiales;f__Ruminococcaceae;g__Oscillospira;s__unidentified_Oscillospira	0.9555169380321693
ASV_229	d__Bacteria;p__Bacteroidetes;c__Bacteroidia;o__Bacteroidales;f__unclassified_Bacteroidales;g__unclassified_Bacteroidales;s__unclassified_Bacteroidales	0.999995527999053
ASV_230	d__Bacteria;p__Bacteroidetes;c__Bacteroidia;o__Bacteroidales;f__S24-7;g__unidentified_S24-7;s__unidentified_S24-7	0.999957625037157
ASV_231	d__Bacteria;p__Firmicutes;c__Clostridia;o__Clostridiales;f__Clostridiaceae;g__Proteiniclasticum;s__unidentified_Proteiniclasticum	0.9992447698000649
ASV_232	d__Bacteria;p__Proteobacteria;c__Alphaproteobacteria;o__Rhodospirillales;f__Acetobacteraceae;g__Roseomonas;s__unidentified_Roseomonas	0.999902629891814
ASV_233	d__Bacteria;p__Proteobacteria;c__Betaproteobacteria;o__Burkholderiales;f__Comamonadaceae;g__unclassified_Comamonadaceae;s__unclassified_Comamonadaceae	0.942096148189798
ASV_234	d__Bacteria;p__Proteobacteria;c__Betaproteobacteria;o__Burkholderiales;f__Oxalobacteraceae;g__unclassified_Oxalobacteraceae;s__unclassified_Oxalobacteraceae	0.7872561461831094
ASV_235	d__Bacteria;p__Bacteroidetes;c__Bacteroidia;o__Bacteroidales;f__Bacteroidaceae;g__Bacteroides;s__unidentified_Bacteroides	0.9895730394071927
ASV_236	d__Bacteria;p__Actinobacteria;c__Thermoleophilia;o__Solirubrobacterales;f__unidentified_Solirubrobacterales;g__unidentified_Solirubrobacterales;s__unidentified_Solirubrobacterales	0.9550735900571032
ASV_237	d__Bacteria;p__Firmicutes;c__Bacilli;o__Lactobacillales;f__Lactobacillaceae;g__Lactobacillus;s__unclassified_Lactobacillus	0.9101504300314581
ASV_238	d__Bacteria;p__Firmicutes;c__Clostridia;o__Clostridiales;f__Ruminococcaceae;g__unidentified_Ruminococcaceae;s__unidentified_Ruminococcaceae	0.7615976569943208
ASV_239	d__Bacteria;p__Firmicutes;c__Bacilli;o__unclassified_Bacilli;f__unclassified_Bacilli;g__unclassified_Bacilli;s__unclassified_Bacilli	0.9416237716425214
ASV_240	d__Bacteria;p__unidentified_Bacteria;c__unidentified_Bacteria;o__unidentified_Bacteria;f__unidentified_Bacteria;g__unidentified_Bacteria;s__unidentified_Bacteria	0.9602914965562874
ASV_241	d__Bacteria;p__Firmicutes;c__Clostridia;o__Clostridiales;f__unidentified_Clostridiales;g__unidentified_Clostridiales;s__unidentified_Clostridiales	0.9998960525188957
ASV_242	d__Bacteria;p__unclassified_Bacteria;c__unclassified_Bacteria;o__unclassified_Bacteria;f__unclassified_Bacteria;g__unclassified_Bacteria;s__unclassified_Bacteria	0.9999999981331678
ASV_243	d__Bacteria;p__Bacteroidetes;c__Bacteroidia;o__Bacteroidales;f__Bacteroidaceae;g__Bacteroides;s__unidentified_Bacteroides	0.9932055988158927
ASV_244	d__Bacteria;p__Tenericutes;c__Mollicutes;o__RF39;f__unidentified_RF39;g__unidentified_RF39;s__unidentified_RF39	0.9999999996401527
ASV_245	d__Bacteria;p__Bacteroidetes;c__Bacteroidia;o__Bacteroidales;f__Bacteroidaceae;g__Bacteroides;s__unidentified_Bacteroides	0.9999393004276539
ASV_246	d__Bacteria;p__Proteobacteria;c__Alphaproteobacteria;o__Rhizobiales;f__unclassified_Rhizobiales;g__unclassified_Rhizobiales;s__unclassified_Rhizobiales	0.9235138619927932
ASV_247	d__Bacteria;p__Proteobacteria;c__Gammaproteobacteria;o__Pseudomonadales;f__Moraxellaceae;g__Acinetobacter;s__unidentified_Acinetobacter	0.8660269504176784
ASV_248	d__Bacteria;p__Firmicutes;c__Clostridia;o__Clostridiales;f__Clostridiaceae;g__unidentified_Clostridiaceae;s__unidentified_Clostridiaceae	0.9229795074073962
ASV_249	d__Bacteria;p__Proteobacteria;c__Betaproteobacteria;o__Burkholderiales;f__Comamonadaceae;g__unclassified_Comamonadaceae;s__unclassified_Comamonadaceae	0.9998919402124241
ASV_250	d__Bacteria;p__Firmicutes;c__Bacilli;o__Bacillales;f__Paenibacillaceae;g__Aneurinibacillus;s__Aneurinibacillus_migulanus	0.932334245043185
ASV_251	d__Bacteria;p__Bacteroidetes;c__Bacteroidia;o__Bacteroidales;f__Porphyromonadaceae;g__Porphyromonas;s__unidentified_Porphyromonas	0.9999546270807161
ASV_252	d__Bacteria;p__Proteobacteria;c__Betaproteobacteria;o__Burkholderiales;f__Comamonadaceae;g__unclassified_Comamonadaceae;s__unclassified_Comamonadaceae	0.9999944428127953
ASV_253	d__Bacteria;p__Bacteroidetes;c__Bacteroidia;o__Bacteroidales;f__Bacteroidaceae;g__Bacteroides;s__unidentified_Bacteroides	0.9707932075184776
ASV_254	d__Bacteria;p__Firmicutes;c__Clostridia;o__Clostridiales;f__Ruminococcaceae;g__unidentified_Ruminococcaceae;s__unidentified_Ruminococcaceae	0.9997922205846833
ASV_255	d__Bacteria;p__Proteobacteria;c__Gammaproteobacteria;o__unclassified_Gammaproteobacteria;f__unclassified_Gammaproteobacteria;g__unclassified_Gammaproteobacteria;s__unclassified_Gammaproteobacteria	0.9792001449079711
ASV_256	d__Bacteria;p__Proteobacteria;c__Gammaproteobacteria;o__Xanthomonadales;f__Xanthomonadaceae;g__unclassified_Xanthomonadaceae;s__unclassified_Xanthomonadaceae	0.8449253260578027
ASV_257	d__Bacteria;p__Bacteroidetes;c__Bacteroidia;o__Bacteroidales;f__Prevotellaceae;g__Prevotella;s__unidentified_Prevotella	0.9994508916089435
ASV_258	d__Bacteria;p__Actinobacteria;c__Actinobacteria;o__Actinomycetales;f__unclassified_Actinomycetales;g__unclassified_Actinomycetales;s__unclassified_Actinomycetales	0.9986083935684678
ASV_259	d__Bacteria;p__Chloroflexi;c__unclassified_Chloroflexi;o__unclassified_Chloroflexi;f__unclassified_Chloroflexi;g__unclassified_Chloroflexi;s__unclassified_Chloroflexi	0.7851005635982926
ASV_260	d__Bacteria;p__Firmicutes;c__Clostridia;o__Clostridiales;f__unclassified_Clostridiales;g__unclassified_Clostridiales;s__unclassified_Clostridiales	0.964182276440239
ASV_261	d__Bacteria;p__Firmicutes;c__Clostridia;o__Clostridiales;f__Ruminococcaceae;g__Oscillospira;s__unidentified_Oscillospira	0.9998558945995308
ASV_262	d__Bacteria;p__Actinobacteria;c__Actinobacteria;o__Micrococcales;f__unidentified_Micrococcales;g__unidentified_Micrococcales;s__unidentified_Micrococcales	0.999999968580568
ASV_263	d__Bacteria;p__Firmicutes;c__Clostridia;o__Clostridiales;f__unclassified_Clostridiales;g__unclassified_Clostridiales;s__unclassified_Clostridiales	0.9999999999549426
ASV_264	d__Bacteria;p__unclassified_Bacteria;c__unclassified_Bacteria;o__unclassified_Bacteria;f__unclassified_Bacteria;g__unclassified_Bacteria;s__unclassified_Bacteria	0.9999999999999172
ASV_265	d__Bacteria;p__Firmicutes;c__Clostridia;o__Clostridiales;f__unclassified_Clostridiales;g__unclassified_Clostridiales;s__unclassified_Clostridiales	0.9999999990324626
ASV_266	d__Bacteria;p__Actinobacteria;c__Acidimicrobiia;o__Acidimicrobiales;f__unidentified_Acidimicrobiales;g__unidentified_Acidimicrobiales;s__unidentified_Acidimicrobiales	0.9999885224342937
ASV_267	d__Bacteria;p__OD1;c__unidentified_OD1;o__unidentified_OD1;f__unidentified_OD1;g__unidentified_OD1;s__unidentified_OD1	0.9998951242867091
ASV_268	d__Bacteria;p__unclassified_Bacteria;c__unclassified_Bacteria;o__unclassified_Bacteria;f__unclassified_Bacteria;g__unclassified_Bacteria;s__unclassified_Bacteria	0.9999999999486375
ASV_269	d__Bacteria;p__Bacteroidetes;c__Bacteroidia;o__Bacteroidales;f__S24-7;g__unidentified_S24-7;s__unidentified_S24-7	0.9999986766942415
ASV_270	d__Bacteria;p__unidentified_Bacteria;c__unidentified_Bacteria;o__unidentified_Bacteria;f__unidentified_Bacteria;g__unidentified_Bacteria;s__unidentified_Bacteria	0.7520716665537602
ASV_271	d__Bacteria;p__Firmicutes;c__Clostridia;o__Clostridiales;f__Christensenellaceae;g__unidentified_Christensenellaceae;s__unidentified_Christensenellaceae	0.7758842482410219
ASV_272	d__Bacteria;p__Firmicutes;c__Clostridia;o__Clostridiales;f__Ruminococcaceae;g__unidentified_Ruminococcaceae;s__unidentified_Ruminococcaceae	0.8281545424785477
ASV_273	d__Bacteria;p__Firmicutes;c__Clostridia;o__Clostridiales;f__unidentified_Clostridiales;g__unidentified_Clostridiales;s__unidentified_Clostridiales	0.9947031070118655
ASV_274	d__Bacteria;p__Proteobacteria;c__Alphaproteobacteria;o__Caulobacterales;f__Caulobacteraceae;g__Brevundimonas;s__unclassified_Brevundimonas	0.8155129010158249
ASV_275	d__Bacteria;p__Actinobacteria;c__Actinobacteria;o__Actinomycetales;f__Geodermatophilaceae;g__Blastococcus;s__Blastococcus_saxobsidens	0.8405390973341345
ASV_276	d__Bacteria;p__Firmicutes;c__Clostridia;o__Clostridiales;f__Ruminococcaceae;g__unidentified_Ruminococcaceae;s__unidentified_Ruminococcaceae	0.704904030116672
ASV_277	d__Bacteria;p__Firmicutes;c__Clostridia;o__Clostridiales;f__Ruminococcaceae;g__Ruminococcus;s__unclassified_Ruminococcus	0.9990334836070922
ASV_278	d__Bacteria;p__Firmicutes;c__Clostridia;o__Clostridiales;f__Peptostreptococcaceae;g__Clostridium;s__Clostridium_sticklandii	0.9982871902449018
ASV_279	d__Bacteria;p__Firmicutes;c__Clostridia;o__Clostridiales;f__Lachnospiraceae;g__Blautia;s__unidentified_Blautia	0.7247124546060019
ASV_280	d__Bacteria;p__unidentified_Bacteria;c__unidentified_Bacteria;o__unidentified_Bacteria;f__unidentified_Bacteria;g__unidentified_Bacteria;s__unidentified_Bacteria	0.9629110351511726
ASV_281	d__Bacteria;p__Firmicutes;c__Bacilli;o__Lactobacillales;f__Lactobacillaceae;g__Lactobacillus;s__unidentified_Lactobacillus	0.9894453473939889
ASV_282	d__Bacteria;p__Proteobacteria;c__Betaproteobacteria;o__unclassified_Betaproteobacteria;f__unclassified_Betaproteobacteria;g__unclassified_Betaproteobacteria;s__unclassified_Betaproteobacteria	0.920356065831203
ASV_283	d__Bacteria;p__Tenericutes;c__Mollicutes;o__RF39;f__unidentified_RF39;g__unidentified_RF39;s__unidentified_RF39	0.8106429363618901
ASV_284	d__Bacteria;p__Proteobacteria;c__Deltaproteobacteria;o__Myxococcales;f__Cystobacteraceae;g__unclassified_Cystobacteraceae;s__unclassified_Cystobacteraceae	0.9431204462825193
ASV_285	d__Bacteria;p__Firmicutes;c__Clostridia;o__Clostridiales;f__Ruminococcaceae;g__unidentified_Ruminococcaceae;s__unidentified_Ruminococcaceae	0.9995451597793827
ASV_286	d__Bacteria;p__Firmicutes;c__Bacilli;o__Bacillales;f__Bacillaceae;g__Bacillus;s__unclassified_Bacillus	0.9868853600294555
ASV_287	d__Bacteria;p__Bacteroidetes;c__Bacteroidia;o__Bacteroidales;f__S24-7;g__unidentified_S24-7;s__unidentified_S24-7	0.9999953643573759
ASV_288	d__Bacteria;p__TM7;c__unidentified_TM7;o__unidentified_TM7;f__unidentified_TM7;g__unidentified_TM7;s__unidentified_TM7	0.7101740042765704
ASV_289	d__Bacteria;p__unclassified_Bacteria;c__unclassified_Bacteria;o__unclassified_Bacteria;f__unclassified_Bacteria;g__unclassified_Bacteria;s__unclassified_Bacteria	0.9999999999285005
ASV_290	d__Bacteria;p__Firmicutes;c__Bacilli;o__unclassified_Bacilli;f__unclassified_Bacilli;g__unclassified_Bacilli;s__unclassified_Bacilli	0.9874821216651657
ASV_291	d__Bacteria;p__Firmicutes;c__Clostridia;o__Clostridiales;f__Ruminococcaceae;g__Oscillospira;s__unidentified_Oscillospira	0.8949971276400582
ASV_292	d__Bacteria;p__unidentified_Bacteria;c__unidentified_Bacteria;o__unidentified_Bacteria;f__unidentified_Bacteria;g__unidentified_Bacteria;s__unidentified_Bacteria	0.7986415141769463
ASV_293	d__Bacteria;p__Proteobacteria;c__Betaproteobacteria;o__Burkholderiales;f__Comamonadaceae;g__unclassified_Comamonadaceae;s__unclassified_Comamonadaceae	0.9991323073994788
ASV_294	d__Bacteria;p__NC10;c__wb1-A12;o__unidentified_wb1-A12;f__unidentified_wb1-A12;g__unidentified_wb1-A12;s__unidentified_wb1-A12	0.9999999139188028
ASV_295	d__Bacteria;p__Acidobacteria;c__Acidobacteriia;o__Acidobacteriales;f__Acidobacteriaceae;g__unidentified_Acidobacteriaceae;s__unidentified_Acidobacteriaceae	0.999766967002704
ASV_296	d__Bacteria;p__Bacteroidetes;c__Bacteroidia;o__Bacteroidales;f__S24-7;g__unidentified_S24-7;s__unidentified_S24-7	0.9999998396350649
ASV_297	d__Bacteria;p__Firmicutes;c__Clostridia;o__Clostridiales;f__Ruminococcaceae;g__unidentified_Ruminococcaceae;s__unidentified_Ruminococcaceae	0.8985134794358896
ASV_298	d__Bacteria;p__Firmicutes;c__Clostridia;o__Clostridiales;f__unidentified_Clostridiales;g__unidentified_Clostridiales;s__unidentified_Clostridiales	0.955217140148382
ASV_299	d__Bacteria;p__Firmicutes;c__Clostridia;o__Clostridiales;f__unidentified_Clostridiales;g__unidentified_Clostridiales;s__unidentified_Clostridiales	0.7188167072528704
ASV_300	d__Bacteria;p__Actinobacteria;c__Actinobacteria;o__Actinomycetales;f__Streptomycetaceae;g__Streptomyces;s__unclassified_Streptomyces	0.8261412194798523
ASV_301	d__Bacteria;p__Firmicutes;c__Clostridia;o__Clostridiales;f__Lachnospiraceae;g__unidentified_Lachnospiraceae;s__unidentified_Lachnospiraceae	0.9407579094807615
ASV_302	d__Bacteria;p__unclassified_Bacteria;c__unclassified_Bacteria;o__unclassified_Bacteria;f__unclassified_Bacteria;g__unclassified_Bacteria;s__unclassified_Bacteria	0.999999999998211
ASV_303	d__Bacteria;p__Firmicutes;c__Clostridia;o__Clostridiales;f__Lachnospiraceae;g__[Ruminococcus];s__[Ruminococcus]_gnavus	0.9961567576758255
ASV_304	d__Bacteria;p__Acidobacteria;c__Acidobacteriia;o__Acidobacteriales;f__Acidobacteriaceae;g__unclassified_Acidobacteriaceae;s__unclassified_Acidobacteriaceae	0.9950847003476705
ASV_305	d__Bacteria;p__Proteobacteria;c__Gammaproteobacteria;o__Oceanospirillales;f__Halomonadaceae;g__Halomonas;s__unidentified_Halomonas	0.8989062087523588
ASV_306	d__Bacteria;p__Actinobacteria;c__Actinobacteria;o__Actinomycetales;f__Micromonosporaceae;g__unclassified_Micromonosporaceae;s__unclassified_Micromonosporaceae	0.9830065234853089
ASV_307	d__Bacteria;p__Bacteroidetes;c__Bacteroidia;o__Bacteroidales;f__Rikenellaceae;g__unclassified_Rikenellaceae;s__unclassified_Rikenellaceae	0.9852821508970718
ASV_308	d__Bacteria;p__Bacteroidetes;c__Flavobacteriia;o__Flavobacteriales;f__[Weeksellaceae];g__Chryseobacterium;s__unidentified_Chryseobacterium	0.8472708178854532
ASV_309	d__Bacteria;p__Firmicutes;c__Clostridia;o__Clostridiales;f__Ruminococcaceae;g__Oscillospira;s__unidentified_Oscillospira	0.9850993922417457
ASV_310	d__Bacteria;p__Bacteroidetes;c__Bacteroidia;o__Bacteroidales;f__unidentified_Bacteroidales;g__unidentified_Bacteroidales;s__unidentified_Bacteroidales	0.9721477906437255
ASV_311	d__Bacteria;p__Proteobacteria;c__Betaproteobacteria;o__Burkholderiales;f__unclassified_Burkholderiales;g__unclassified_Burkholderiales;s__unclassified_Burkholderiales	0.9358243499728233
ASV_312	d__Bacteria;p__Firmicutes;c__Clostridia;o__Clostridiales;f__Lachnospiraceae;g__unidentified_Lachnospiraceae;s__unidentified_Lachnospiraceae	0.9514968044804852
ASV_313	d__Bacteria;p__Firmicutes;c__Clostridia;o__Clostridiales;f__unidentified_Clostridiales;g__unidentified_Clostridiales;s__unidentified_Clostridiales	0.9548529115525582
ASV_314	d__Bacteria;p__Bacteroidetes;c__Bacteroidia;o__Bacteroidales;f__Prevotellaceae;g__Prevotella;s__unidentified_Prevotella	0.9619790721251825
ASV_315	d__Bacteria;p__Firmicutes;c__Clostridia;o__Clostridiales;f__Veillonellaceae;g__Phascolarctobacterium;s__unidentified_Phascolarctobacterium	0.9999995085538629
ASV_316	d__Bacteria;p__Firmicutes;c__Clostridia;o__Clostridiales;f__Lachnospiraceae;g__unidentified_Lachnospiraceae;s__unidentified_Lachnospiraceae	0.7860950487759844
ASV_317	d__Bacteria;p__Bacteroidetes;c__Bacteroidia;o__Bacteroidales;f__Porphyromonadaceae;g__Parabacteroides;s__Parabacteroides_distasonis	0.9965615287580404
ASV_318	d__Bacteria;p__Proteobacteria;c__Alphaproteobacteria;o__Sphingomonadales;f__Sphingomonadaceae;g__unclassified_Sphingomonadaceae;s__unclassified_Sphingomonadaceae	0.9515844314810895
ASV_319	d__Bacteria;p__Firmicutes;c__Clostridia;o__Clostridiales;f__unidentified_Clostridiales;g__unidentified_Clostridiales;s__unidentified_Clostridiales	0.7387943106324328
ASV_320	d__Bacteria;p__Firmicutes;c__Clostridia;o__Clostridiales;f__unidentified_Clostridiales;g__unidentified_Clostridiales;s__unidentified_Clostridiales	0.999964793370428
ASV_321	d__Bacteria;p__Firmicutes;c__Clostridia;o__Clostridiales;f__unidentified_Clostridiales;g__unidentified_Clostridiales;s__unidentified_Clostridiales	0.9999330557226511
ASV_322	d__Bacteria;p__Firmicutes;c__Clostridia;o__Clostridiales;f__Lachnospiraceae;g__unidentified_Lachnospiraceae;s__unidentified_Lachnospiraceae	0.781742158027302
ASV_323	d__Bacteria;p__Firmicutes;c__Clostridia;o__Clostridiales;f__unclassified_Clostridiales;g__unclassified_Clostridiales;s__unclassified_Clostridiales	0.7508591437922931
ASV_324	d__Bacteria;p__Bacteroidetes;c__Bacteroidia;o__Bacteroidales;f__unclassified_Bacteroidales;g__unclassified_Bacteroidales;s__unclassified_Bacteroidales	0.9702805615243761
ASV_325	d__Bacteria;p__unclassified_Bacteria;c__unclassified_Bacteria;o__unclassified_Bacteria;f__unclassified_Bacteria;g__unclassified_Bacteria;s__unclassified_Bacteria	0.9999999999944407
ASV_326	d__Bacteria;p__Actinobacteria;c__Actinobacteria;o__Actinomycetales;f__Streptomycetaceae;g__Streptomyces;s__unclassified_Streptomyces	0.8123879944590553
ASV_327	d__Bacteria;p__Actinobacteria;c__Actinobacteria;o__Actinomycetales;f__Frankiaceae;g__unidentified_Frankiaceae;s__unidentified_Frankiaceae	0.9973723393379
ASV_328	d__Bacteria;p__Proteobacteria;c__Gammaproteobacteria;o__Legionellales;f__Legionellaceae;g__Legionella;s__Legionella_pneumophila	0.8980983020937843
ASV_329	d__Bacteria;p__Bacteroidetes;c__Bacteroidia;o__Bacteroidales;f__[Paraprevotellaceae];g__CF231;s__unidentified_CF231	0.9929850468282547
ASV_330	d__Bacteria;p__Firmicutes;c__Bacilli;o__Bacillales;f__Paenibacillaceae;g__Paenibacillus;s__unidentified_Paenibacillus	0.9236912249995507
ASV_331	d__Bacteria;p__Firmicutes;c__Clostridia;o__Clostridiales;f__unidentified_Clostridiales;g__unidentified_Clostridiales;s__unidentified_Clostridiales	0.9992078065648144
ASV_332	d__Bacteria;p__Actinobacteria;c__Actinobacteria;o__Actinomycetales;f__unclassified_Actinomycetales;g__unclassified_Actinomycetales;s__unclassified_Actinomycetales	0.9999999966048234
ASV_333	d__Bacteria;p__Firmicutes;c__Clostridia;o__Clostridiales;f__Lachnospiraceae;g__unidentified_Lachnospiraceae;s__unidentified_Lachnospiraceae	0.929892941103871
ASV_334	d__Bacteria;p__Firmicutes;c__Clostridia;o__Clostridiales;f__Lachnospiraceae;g__unidentified_Lachnospiraceae;s__unidentified_Lachnospiraceae	0.8389357174371258
ASV_335	d__Bacteria;p__Actinobacteria;c__Actinobacteria;o__Actinomycetales;f__unidentified_Actinomycetales;g__unidentified_Actinomycetales;s__unidentified_Actinomycetales	0.7794889960824423
ASV_336	d__Bacteria;p__Actinobacteria;c__Thermoleophilia;o__Solirubrobacterales;f__Solirubrobacteraceae;g__unidentified_Solirubrobacteraceae;s__unidentified_Solirubrobacteraceae	0.9897815026201069
ASV_337	d__Bacteria;p__TM7;c__TM7-1;o__unidentified_TM7-1;f__unidentified_TM7-1;g__unidentified_TM7-1;s__unidentified_TM7-1	0.99999912799019
ASV_338	d__Bacteria;p__Firmicutes;c__Clostridia;o__Clostridiales;f__Ruminococcaceae;g__unidentified_Ruminococcaceae;s__unidentified_Ruminococcaceae	0.7445647321196253
ASV_339	d__Bacteria;p__Proteobacteria;c__Gammaproteobacteria;o__Xanthomonadales;f__Xanthomonadaceae;g__unclassified_Xanthomonadaceae;s__unclassified_Xanthomonadaceae	0.9788669861263033
ASV_340	d__Bacteria;p__Firmicutes;c__Clostridia;o__Clostridiales;f__unclassified_Clostridiales;g__unclassified_Clostridiales;s__unclassified_Clostridiales	0.9999999999016875
ASV_341	d__Bacteria;p__Proteobacteria;c__Gammaproteobacteria;o__Alteromonadales;f__Colwelliaceae;g__Colwellia;s__unclassified_Colwellia	0.9714523772550758
ASV_342	d__Bacteria;p__Acidobacteria;c__DA052;o__Ellin6513;f__unidentified_Ellin6513;g__unidentified_Ellin6513;s__unidentified_Ellin6513	0.9898760668232565
ASV_343	d__Bacteria;p__Firmicutes;c__Clostridia;o__Clostridiales;f__Lachnospiraceae;g__unclassified_Lachnospiraceae;s__unclassified_Lachnospiraceae	0.7756416633533306
ASV_344	d__Bacteria;p__Bacteroidetes;c__Bacteroidia;o__Bacteroidales;f__S24-7;g__unidentified_S24-7;s__unidentified_S24-7	0.9999990622451227
ASV_345	d__Bacteria;p__Firmicutes;c__Clostridia;o__Clostridiales;f__Ruminococcaceae;g__unidentified_Ruminococcaceae;s__unidentified_Ruminococcaceae	0.9883098160469023
ASV_346	d__Bacteria;p__unclassified_Bacteria;c__unclassified_Bacteria;o__unclassified_Bacteria;f__unclassified_Bacteria;g__unclassified_Bacteria;s__unclassified_Bacteria	0.9999999999748744
ASV_347	d__Bacteria;p__Proteobacteria;c__Deltaproteobacteria;o__Desulfovibrionales;f__Desulfovibrionaceae;g__Desulfovibrio;s__unidentified_Desulfovibrio	0.9530309428712068
ASV_348	d__Bacteria;p__Firmicutes;c__Clostridia;o__Clostridiales;f__Clostridiaceae;g__unidentified_Clostridiaceae;s__unidentified_Clostridiaceae	0.8467809303576231
ASV_349	d__Bacteria;p__Proteobacteria;c__unclassified_Proteobacteria;o__unclassified_Proteobacteria;f__unclassified_Proteobacteria;g__unclassified_Proteobacteria;s__unclassified_Proteobacteria	0.9993898706296828
ASV_350	d__Bacteria;p__Firmicutes;c__Clostridia;o__Clostridiales;f__unclassified_Clostridiales;g__unclassified_Clostridiales;s__unclassified_Clostridiales	0.99999999731254
ASV_351	d__Bacteria;p__Firmicutes;c__Clostridia;o__Clostridiales;f__Ruminococcaceae;g__unidentified_Ruminococcaceae;s__unidentified_Ruminococcaceae	0.7190707929017642
ASV_352	d__Bacteria;p__Firmicutes;c__Clostridia;o__Clostridiales;f__Lachnospiraceae;g__unclassified_Lachnospiraceae;s__unclassified_Lachnospiraceae	0.9714311645280672
ASV_353	d__Bacteria;p__Bacteroidetes;c__Bacteroidia;o__Bacteroidales;f__unidentified_Bacteroidales;g__unidentified_Bacteroidales;s__unidentified_Bacteroidales	0.9999618208770137
ASV_354	d__Bacteria;p__Actinobacteria;c__Actinobacteria;o__Actinomycetales;f__Micromonosporaceae;g__Dactylosporangium;s__unidentified_Dactylosporangium	0.71626469714217
ASV_355	d__Bacteria;p__Bacteroidetes;c__Bacteroidia;o__Bacteroidales;f__S24-7;g__unidentified_S24-7;s__unidentified_S24-7	0.999999970295534
ASV_356	d__Bacteria;p__Firmicutes;c__Clostridia;o__Clostridiales;f__Ruminococcaceae;g__unidentified_Ruminococcaceae;s__unidentified_Ruminococcaceae	0.9997401406271114
ASV_357	d__Bacteria;p__Firmicutes;c__Bacilli;o__Bacillales;f__Bacillaceae;g__Bacillus;s__unclassified_Bacillus	0.7091154205881485
ASV_358	d__Bacteria;p__Proteobacteria;c__Betaproteobacteria;o__Burkholderiales;f__Comamonadaceae;g__unclassified_Comamonadaceae;s__unclassified_Comamonadaceae	0.9998624742338997
ASV_359	d__Bacteria;p__Firmicutes;c__Clostridia;o__Clostridiales;f__unidentified_Clostridiales;g__unidentified_Clostridiales;s__unidentified_Clostridiales	0.8267789992293957
ASV_360	d__Bacteria;p__TM7;c__TM7-3;o__EW055;f__unidentified_EW055;g__unidentified_EW055;s__unidentified_EW055	0.9978276812841795
ASV_361	d__Bacteria;p__Firmicutes;c__Clostridia;o__Clostridiales;f__unidentified_Clostridiales;g__unidentified_Clostridiales;s__unidentified_Clostridiales	0.9804454315614491
ASV_362	d__Bacteria;p__Firmicutes;c__Clostridia;o__Clostridiales;f__Lachnospiraceae;g__Dorea;s__unidentified_Dorea	0.9623103449146502
ASV_363	d__Bacteria;p__Firmicutes;c__Clostridia;o__Clostridiales;f__Ruminococcaceae;g__unidentified_Ruminococcaceae;s__unidentified_Ruminococcaceae	0.7471766603140367
ASV_364	d__Bacteria;p__Firmicutes;c__Clostridia;o__Clostridiales;f__Clostridiaceae;g__Clostridium;s__unidentified_Clostridium	0.712048475777297
ASV_365	d__Bacteria;p__Bacteroidetes;c__Bacteroidia;o__Bacteroidales;f__unidentified_Bacteroidales;g__unidentified_Bacteroidales;s__unidentified_Bacteroidales	0.999254723530667
ASV_366	d__Bacteria;p__Firmicutes;c__Bacilli;o__Bacillales;f__Planococcaceae;g__Planomicrobium;s__unidentified_Planomicrobium	0.9005429639838625
ASV_367	d__Bacteria;p__Actinobacteria;c__Actinobacteria;o__Actinomycetales;f__Micrococcaceae;g__Arthrobacter;s__unclassified_Arthrobacter	0.8292687953011035
ASV_368	d__Bacteria;p__Tenericutes;c__Mollicutes;o__RF39;f__unidentified_RF39;g__unidentified_RF39;s__unidentified_RF39	0.9999999956681052
ASV_369	d__Bacteria;p__Proteobacteria;c__Alphaproteobacteria;o__Caulobacterales;f__Caulobacteraceae;g__Caulobacter;s__Caulobacter_vibrioides	0.9529252826260114
ASV_370	d__Bacteria;p__Firmicutes;c__Bacilli;o__Bacillales;f__unidentified_Bacillales;g__unidentified_Bacillales;s__unidentified_Bacillales	0.8752606386132551
ASV_371	d__Bacteria;p__Proteobacteria;c__Gammaproteobacteria;o__unclassified_Gammaproteobacteria;f__unclassified_Gammaproteobacteria;g__unclassified_Gammaproteobacteria;s__unclassified_Gammaproteobacteria	0.8961617524463742
ASV_372	d__Bacteria;p__Firmicutes;c__Bacilli;o__Lactobacillales;f__unclassified_Lactobacillales;g__unclassified_Lactobacillales;s__unclassified_Lactobacillales	0.9697056685067919
ASV_373	d__Bacteria;p__Firmicutes;c__Bacilli;o__Bacillales;f__unclassified_Bacillales;g__unclassified_Bacillales;s__unclassified_Bacillales	0.7490917849807103
ASV_374	d__Bacteria;p__Bacteroidetes;c__Flavobacteriia;o__Flavobacteriales;f__[Weeksellaceae];g__Chryseobacterium;s__unidentified_Chryseobacterium	0.8932762322502049
ASV_375	d__Bacteria;p__Firmicutes;c__Bacilli;o__Lactobacillales;f__unclassified_Lactobacillales;g__unclassified_Lactobacillales;s__unclassified_Lactobacillales	0.8743056903406564
ASV_376	d__Bacteria;p__Proteobacteria;c__Gammaproteobacteria;o__Enterobacteriales;f__Enterobacteriaceae;g__unclassified_Enterobacteriaceae;s__unclassified_Enterobacteriaceae	0.9995541799857814
ASV_377	d__Bacteria;p__Actinobacteria;c__Actinobacteria;o__Actinomycetales;f__Geodermatophilaceae;g__Geodermatophilus;s__unclassified_Geodermatophilus	0.9705363484313136
ASV_378	d__Bacteria;p__Proteobacteria;c__Betaproteobacteria;o__Nitrosomonadales;f__Nitrosomonadaceae;g__Nitrosomonas;s__Nitrosomonas_oligotropha	0.9999764917817582
ASV_379	d__Bacteria;p__Firmicutes;c__Clostridia;o__Clostridiales;f__Clostridiaceae;g__Clostridium;s__unclassified_Clostridium	0.7287165886288205
ASV_380	d__Bacteria;p__Firmicutes;c__Bacilli;o__Lactobacillales;f__Lactobacillaceae;g__Lactobacillus;s__unclassified_Lactobacillus	0.9781202180129475
ASV_381	d__Bacteria;p__Proteobacteria;c__Betaproteobacteria;o__Burkholderiales;f__Comamonadaceae;g__unclassified_Comamonadaceae;s__unclassified_Comamonadaceae	0.8900820768803347
ASV_382	d__Bacteria;p__Firmicutes;c__Clostridia;o__Clostridiales;f__unclassified_Clostridiales;g__unclassified_Clostridiales;s__unclassified_Clostridiales	0.9999999977458573
ASV_383	d__Bacteria;p__Proteobacteria;c__Betaproteobacteria;o__Burkholderiales;f__Comamonadaceae;g__unclassified_Comamonadaceae;s__unclassified_Comamonadaceae	0.9997626804448715
ASV_384	d__Bacteria;p__Proteobacteria;c__Alphaproteobacteria;o__Caulobacterales;f__Caulobacteraceae;g__Brevundimonas;s__unclassified_Brevundimonas	0.7335166047984275
ASV_385	d__Bacteria;p__Firmicutes;c__Clostridia;o__Clostridiales;f__Ruminococcaceae;g__unidentified_Ruminococcaceae;s__unidentified_Ruminococcaceae	0.9999332865422664
ASV_386	d__Bacteria;p__Proteobacteria;c__Alphaproteobacteria;o__unclassified_Alphaproteobacteria;f__unclassified_Alphaproteobacteria;g__unclassified_Alphaproteobacteria;s__unclassified_Alphaproteobacteria	0.9931536052384047
ASV_387	d__Bacteria;p__Bacteroidetes;c__Bacteroidia;o__Bacteroidales;f__Porphyromonadaceae;g__Parabacteroides;s__unidentified_Parabacteroides	0.9985578711033993
ASV_388	d__Bacteria;p__Bacteroidetes;c__Bacteroidia;o__Bacteroidales;f__Rikenellaceae;g__unclassified_Rikenellaceae;s__unclassified_Rikenellaceae	0.9999999986934986
ASV_389	d__Bacteria;p__Proteobacteria;c__Alphaproteobacteria;o__Rhizobiales;f__Bradyrhizobiaceae;g__unclassified_Bradyrhizobiaceae;s__unclassified_Bradyrhizobiaceae	0.9035377054349475
ASV_390	d__Bacteria;p__Firmicutes;c__Clostridia;o__Clostridiales;f__Lachnospiraceae;g__unclassified_Lachnospiraceae;s__unclassified_Lachnospiraceae	0.9841104176243659
ASV_391	d__Bacteria;p__TM7;c__TM7-1;o__unidentified_TM7-1;f__unidentified_TM7-1;g__unidentified_TM7-1;s__unidentified_TM7-1	0.9905342669285713
ASV_392	d__Bacteria;p__Firmicutes;c__Clostridia;o__Clostridiales;f__Ruminococcaceae;g__unidentified_Ruminococcaceae;s__unidentified_Ruminococcaceae	0.9643989184620558
ASV_393	d__Bacteria;p__Firmicutes;c__Clostridia;o__Clostridiales;f__Ruminococcaceae;g__Oscillospira;s__unidentified_Oscillospira	0.999318640707874
ASV_394	d__Bacteria;p__Bacteroidetes;c__Bacteroidia;o__Bacteroidales;f__S24-7;g__unidentified_S24-7;s__unidentified_S24-7	0.9972338508669814
ASV_395	d__Bacteria;p__Firmicutes;c__Clostridia;o__Clostridiales;f__Ruminococcaceae;g__unidentified_Ruminococcaceae;s__unidentified_Ruminococcaceae	0.9754426801605944
ASV_396	d__Bacteria;p__Firmicutes;c__Clostridia;o__Clostridiales;f__Ruminococcaceae;g__Oscillospira;s__unidentified_Oscillospira	0.9997607251268251
ASV_397	d__Bacteria;p__Firmicutes;c__Clostridia;o__Clostridiales;f__unidentified_Clostridiales;g__unidentified_Clostridiales;s__unidentified_Clostridiales	0.8235990201073943
ASV_398	d__Bacteria;p__Actinobacteria;c__Thermoleophilia;o__Gaiellales;f__Gaiellaceae;g__unidentified_Gaiellaceae;s__unidentified_Gaiellaceae	0.9994564045881239
ASV_399	d__Bacteria;p__Firmicutes;c__Clostridia;o__Clostridiales;f__unclassified_Clostridiales;g__unclassified_Clostridiales;s__unclassified_Clostridiales	0.9915040592621981
ASV_400	d__Bacteria;p__Firmicutes;c__Clostridia;o__Clostridiales;f__unidentified_Clostridiales;g__unidentified_Clostridiales;s__unidentified_Clostridiales	0.999761620836332
ASV_401	d__Bacteria;p__Firmicutes;c__Clostridia;o__Clostridiales;f__unidentified_Clostridiales;g__unidentified_Clostridiales;s__unidentified_Clostridiales	0.7581051925685862
ASV_402	d__Bacteria;p__Firmicutes;c__Clostridia;o__Clostridiales;f__Lachnospiraceae;g__unidentified_Lachnospiraceae;s__unidentified_Lachnospiraceae	0.9572549349755692
ASV_403	d__Bacteria;p__Firmicutes;c__Clostridia;o__Clostridiales;f__Ruminococcaceae;g__unidentified_Ruminococcaceae;s__unidentified_Ruminococcaceae	0.9995556421873889
ASV_404	d__Bacteria;p__unidentified_Bacteria;c__unidentified_Bacteria;o__unidentified_Bacteria;f__unidentified_Bacteria;g__unidentified_Bacteria;s__unidentified_Bacteria	0.9484951499931881
ASV_405	d__Bacteria;p__Proteobacteria;c__Alphaproteobacteria;o__unclassified_Alphaproteobacteria;f__unclassified_Alphaproteobacteria;g__unclassified_Alphaproteobacteria;s__unclassified_Alphaproteobacteria	0.9959516660858321
ASV_406	d__Bacteria;p__Firmicutes;c__Clostridia;o__Clostridiales;f__unclassified_Clostridiales;g__unclassified_Clostridiales;s__unclassified_Clostridiales	0.999999999913378
ASV_407	d__Bacteria;p__Bacteroidetes;c__Sphingobacteriia;o__Sphingobacteriales;f__unidentified_Sphingobacteriales;g__unidentified_Sphingobacteriales;s__unidentified_Sphingobacteriales	0.9999901691256874
ASV_408	d__Bacteria;p__Firmicutes;c__Clostridia;o__Clostridiales;f__Ruminococcaceae;g__unidentified_Ruminococcaceae;s__unidentified_Ruminococcaceae	0.7653687368206352
ASV_409	d__Bacteria;p__Proteobacteria;c__Alphaproteobacteria;o__Rickettsiales;f__unidentified_Rickettsiales;g__unidentified_Rickettsiales;s__unidentified_Rickettsiales	0.8570082337653542
ASV_410	d__Bacteria;p__Firmicutes;c__Clostridia;o__Clostridiales;f__unidentified_Clostridiales;g__unidentified_Clostridiales;s__unidentified_Clostridiales	0.9938541344907363
ASV_411	d__Bacteria;p__unidentified_Bacteria;c__unidentified_Bacteria;o__unidentified_Bacteria;f__unidentified_Bacteria;g__unidentified_Bacteria;s__unidentified_Bacteria	0.8889321431403227
ASV_412	d__Bacteria;p__Firmicutes;c__Bacilli;o__Lactobacillales;f__Lactobacillaceae;g__unclassified_Lactobacillaceae;s__unclassified_Lactobacillaceae	0.9905106953399988
ASV_413	d__Bacteria;p__Proteobacteria;c__Gammaproteobacteria;o__Xanthomonadales;f__Xanthomonadaceae;g__Rhodanobacter;s__Rhodanobacter_lindaniclasticus	0.8419112195255621
ASV_414	d__Bacteria;p__Bacteroidetes;c__Bacteroidia;o__Bacteroidales;f__S24-7;g__unidentified_S24-7;s__unidentified_S24-7	0.9643749312753657
ASV_415	d__Bacteria;p__Proteobacteria;c__Gammaproteobacteria;o__unclassified_Gammaproteobacteria;f__unclassified_Gammaproteobacteria;g__unclassified_Gammaproteobacteria;s__unclassified_Gammaproteobacteria	0.7792239963426045
ASV_416	d__Bacteria;p__Proteobacteria;c__Alphaproteobacteria;o__Caulobacterales;f__Caulobacteraceae;g__Caulobacter;s__Caulobacter_vibrioides	0.767815499884419
ASV_417	d__Bacteria;p__Firmicutes;c__Bacilli;o__Lactobacillales;f__Lactobacillaceae;g__unclassified_Lactobacillaceae;s__unclassified_Lactobacillaceae	0.9438359917254021
ASV_418	d__Bacteria;p__Firmicutes;c__Clostridia;o__Clostridiales;f__unidentified_Clostridiales;g__unidentified_Clostridiales;s__unidentified_Clostridiales	0.956198444311373
ASV_419	d__Bacteria;p__Firmicutes;c__Erysipelotrichi;o__Erysipelotrichales;f__Erysipelotrichaceae;g__Holdemania;s__unidentified_Holdemania	0.9999995137713188
ASV_420	d__Bacteria;p__Firmicutes;c__Clostridia;o__Clostridiales;f__Ruminococcaceae;g__unclassified_Ruminococcaceae;s__unclassified_Ruminococcaceae	0.9995540241630212
ASV_421	d__Bacteria;p__Firmicutes;c__Bacilli;o__Lactobacillales;f__Lactobacillaceae;g__Pediococcus;s__Pediococcus_ethanolidurans	0.7409343826383417
ASV_422	d__Bacteria;p__Proteobacteria;c__Gammaproteobacteria;o__Xanthomonadales;f__Xanthomonadaceae;g__Rhodanobacter;s__unclassified_Rhodanobacter	0.8778687781125768
ASV_423	d__Bacteria;p__Proteobacteria;c__Gammaproteobacteria;o__Pseudomonadales;f__Moraxellaceae;g__unclassified_Moraxellaceae;s__unclassified_Moraxellaceae	0.9999997692908928
ASV_424	d__Bacteria;p__Bacteroidetes;c__Bacteroidia;o__Bacteroidales;f__S24-7;g__unidentified_S24-7;s__unidentified_S24-7	0.9998664679720185
ASV_425	d__Bacteria;p__Acidobacteria;c__[Chloracidobacteria];o__RB41;f__unidentified_RB41;g__unidentified_RB41;s__unidentified_RB41	0.9999999995967812
ASV_426	d__Bacteria;p__Firmicutes;c__Clostridia;o__Clostridiales;f__Ruminococcaceae;g__unidentified_Ruminococcaceae;s__unidentified_Ruminococcaceae	0.9892100856361651
ASV_427	d__Bacteria;p__Firmicutes;c__Clostridia;o__Clostridiales;f__Ruminococcaceae;g__Oscillospira;s__unidentified_Oscillospira	0.9252843668625294
ASV_428	d__Bacteria;p__Firmicutes;c__Clostridia;o__Clostridiales;f__Lachnospiraceae;g__Epulopiscium;s__unidentified_Epulopiscium	0.9999666905302527
ASV_429	d__Bacteria;p__Proteobacteria;c__Betaproteobacteria;o__Burkholderiales;f__Comamonadaceae;g__unclassified_Comamonadaceae;s__unclassified_Comamonadaceae	0.9655204565570246
ASV_430	d__Bacteria;p__Proteobacteria;c__Alphaproteobacteria;o__Rhizobiales;f__unclassified_Rhizobiales;g__unclassified_Rhizobiales;s__unclassified_Rhizobiales	0.7716757597470542
ASV_431	d__Bacteria;p__Bacteroidetes;c__Bacteroidia;o__Bacteroidales;f__S24-7;g__unidentified_S24-7;s__unidentified_S24-7	0.9384237324063479
ASV_432	d__Bacteria;p__Firmicutes;c__Clostridia;o__Clostridiales;f__unidentified_Clostridiales;g__unidentified_Clostridiales;s__unidentified_Clostridiales	0.9999427033545115
ASV_433	d__Bacteria;p__Gemmatimonadetes;c__Gemmatimonadetes;o__Ellin5290;f__unidentified_Ellin5290;g__unidentified_Ellin5290;s__unidentified_Ellin5290	0.822768580449079
ASV_434	d__Bacteria;p__Proteobacteria;c__Betaproteobacteria;o__Burkholderiales;f__Comamonadaceae;g__unclassified_Comamonadaceae;s__unclassified_Comamonadaceae	0.9957162198618473
ASV_435	d__Bacteria;p__unclassified_Bacteria;c__unclassified_Bacteria;o__unclassified_Bacteria;f__unclassified_Bacteria;g__unclassified_Bacteria;s__unclassified_Bacteria	0.9999999999989991
ASV_436	d__Bacteria;p__Firmicutes;c__Clostridia;o__Clostridiales;f__Ruminococcaceae;g__unidentified_Ruminococcaceae;s__unidentified_Ruminococcaceae	0.9670272126698477
ASV_437	d__Bacteria;p__Firmicutes;c__Bacilli;o__Lactobacillales;f__Lactobacillaceae;g__Lactobacillus;s__unidentified_Lactobacillus	0.9620063557341418
ASV_438	d__Bacteria;p__Proteobacteria;c__Betaproteobacteria;o__Burkholderiales;f__Comamonadaceae;g__unclassified_Comamonadaceae;s__unclassified_Comamonadaceae	0.9999685770603399
ASV_439	d__Bacteria;p__Proteobacteria;c__unclassified_Proteobacteria;o__unclassified_Proteobacteria;f__unclassified_Proteobacteria;g__unclassified_Proteobacteria;s__unclassified_Proteobacteria	0.9995878195231377
ASV_440	d__Bacteria;p__Firmicutes;c__Clostridia;o__Clostridiales;f__unidentified_Clostridiales;g__unidentified_Clostridiales;s__unidentified_Clostridiales	0.9992672569007455
ASV_441	d__Bacteria;p__unidentified_Bacteria;c__unidentified_Bacteria;o__unidentified_Bacteria;f__unidentified_Bacteria;g__unidentified_Bacteria;s__unidentified_Bacteria	0.7600834303806626
ASV_442	d__Bacteria;p__Firmicutes;c__Clostridia;o__Clostridiales;f__Ruminococcaceae;g__unclassified_Ruminococcaceae;s__unclassified_Ruminococcaceae	0.9996286878578606
ASV_443	d__Bacteria;p__Firmicutes;c__Clostridia;o__Clostridiales;f__Ruminococcaceae;g__unidentified_Ruminococcaceae;s__unidentified_Ruminococcaceae	0.7255123637386712
ASV_444	d__Bacteria;p__Actinobacteria;c__Thermoleophilia;o__Gaiellales;f__Gaiellaceae;g__unidentified_Gaiellaceae;s__unidentified_Gaiellaceae	0.999874465651039
ASV_445	d__Bacteria;p__Gemmatimonadetes;c__Gemm-5;o__unidentified_Gemm-5;f__unidentified_Gemm-5;g__unidentified_Gemm-5;s__unidentified_Gemm-5	0.9999999979705478
ASV_446	d__Bacteria;p__Firmicutes;c__Bacilli;o__Bacillales;f__unclassified_Bacillales;g__unclassified_Bacillales;s__unclassified_Bacillales	0.9934945542233476
ASV_447	d__Bacteria;p__Proteobacteria;c__Betaproteobacteria;o__Burkholderiales;f__Comamonadaceae;g__unclassified_Comamonadaceae;s__unclassified_Comamonadaceae	0.9983508720839677
ASV_448	d__Bacteria;p__Proteobacteria;c__Alphaproteobacteria;o__Rhizobiales;f__unidentified_Rhizobiales;g__unidentified_Rhizobiales;s__unidentified_Rhizobiales	0.812992380103789
ASV_449	d__Bacteria;p__Firmicutes;c__Clostridia;o__Clostridiales;f__Lachnospiraceae;g__unidentified_Lachnospiraceae;s__unidentified_Lachnospiraceae	0.7333724040647984
ASV_450	d__Bacteria;p__Firmicutes;c__Clostridia;o__Clostridiales;f__unclassified_Clostridiales;g__unclassified_Clostridiales;s__unclassified_Clostridiales	0.9999999997612472
ASV_451	d__Bacteria;p__Firmicutes;c__Clostridia;o__Clostridiales;f__Veillonellaceae;g__unidentified_Veillonellaceae;s__unidentified_Veillonellaceae	0.7930093793804034
ASV_452	d__Bacteria;p__Bacteroidetes;c__Bacteroidia;o__Bacteroidales;f__S24-7;g__unidentified_S24-7;s__unidentified_S24-7	0.9925914496305751
ASV_453	d__Bacteria;p__Firmicutes;c__Clostridia;o__Clostridiales;f__Lachnospiraceae;g__[Ruminococcus];s__unidentified_[Ruminococcus]	0.8480364200108116
ASV_454	d__Bacteria;p__Proteobacteria;c__Gammaproteobacteria;o__Xanthomonadales;f__Xanthomonadaceae;g__unclassified_Xanthomonadaceae;s__unclassified_Xanthomonadaceae	0.9932237501766209
ASV_455	d__Bacteria;p__Firmicutes;c__Clostridia;o__Clostridiales;f__Lachnospiraceae;g__unidentified_Lachnospiraceae;s__unidentified_Lachnospiraceae	0.7728231701792342
ASV_456	d__Bacteria;p__Firmicutes;c__Clostridia;o__Clostridiales;f__Lachnospiraceae;g__unidentified_Lachnospiraceae;s__unidentified_Lachnospiraceae	0.7267934903820878
ASV_457	d__Bacteria;p__TM7;c__TM7-1;o__unidentified_TM7-1;f__unidentified_TM7-1;g__unidentified_TM7-1;s__unidentified_TM7-1	0.9986404148582363
ASV_458	d__Bacteria;p__Actinobacteria;c__Actinobacteria;o__Actinomycetales;f__unidentified_Actinomycetales;g__unidentified_Actinomycetales;s__unidentified_Actinomycetales	0.9557411961076528
ASV_459	d__Bacteria;p__Bacteroidetes;c__Bacteroidia;o__Bacteroidales;f__BS11;g__unidentified_BS11;s__unidentified_BS11	0.9999493446824315
ASV_460	d__Bacteria;p__Proteobacteria;c__Gammaproteobacteria;o__Enterobacteriales;f__Enterobacteriaceae;g__Shigella;s__unclassified_Shigella	0.7050057017951947
ASV_461	d__Bacteria;p__Proteobacteria;c__Alphaproteobacteria;o__Rhizobiales;f__Xanthobacteraceae;g__unclassified_Xanthobacteraceae;s__unclassified_Xanthobacteraceae	0.8577891961387951
ASV_462	d__Bacteria;p__Bacteroidetes;c__unclassified_Bacteroidetes;o__unclassified_Bacteroidetes;f__unclassified_Bacteroidetes;g__unclassified_Bacteroidetes;s__unclassified_Bacteroidetes	0.9999999005541665
ASV_463	d__Bacteria;p__Firmicutes;c__Clostridia;o__Clostridiales;f__unclassified_Clostridiales;g__unclassified_Clostridiales;s__unclassified_Clostridiales	0.9999852800110294
ASV_464	d__Bacteria;p__Bacteroidetes;c__Bacteroidia;o__Bacteroidales;f__S24-7;g__unidentified_S24-7;s__unidentified_S24-7	0.9433670030431702
ASV_465	d__Bacteria;p__Proteobacteria;c__Gammaproteobacteria;o__unclassified_Gammaproteobacteria;f__unclassified_Gammaproteobacteria;g__unclassified_Gammaproteobacteria;s__unclassified_Gammaproteobacteria	0.9999993730545969
ASV_466	d__Bacteria;p__Proteobacteria;c__Alphaproteobacteria;o__Rhizobiales;f__Bradyrhizobiaceae;g__Afipia;s__Afipia_broomeae	0.7082291006955537
ASV_467	d__Bacteria;p__Proteobacteria;c__Gammaproteobacteria;o__Legionellales;f__Coxiellaceae;g__unidentified_Coxiellaceae;s__unidentified_Coxiellaceae	0.8444054984798637
ASV_468	d__Bacteria;p__Firmicutes;c__Erysipelotrichi;o__Erysipelotrichales;f__Erysipelotrichaceae;g__unclassified_Erysipelotrichaceae;s__unclassified_Erysipelotrichaceae	0.9999495492782555
ASV_469	d__Bacteria;p__Firmicutes;c__Clostridia;o__Clostridiales;f__unclassified_Clostridiales;g__unclassified_Clostridiales;s__unclassified_Clostridiales	0.9999999999329157
ASV_470	d__Bacteria;p__Firmicutes;c__Clostridia;o__Clostridiales;f__Ruminococcaceae;g__unidentified_Ruminococcaceae;s__unidentified_Ruminococcaceae	0.9941607234699418
ASV_471	d__Bacteria;p__Proteobacteria;c__Gammaproteobacteria;o__Oceanospirillales;f__Alcanivoracaceae;g__Alcanivorax;s__Alcanivorax_dieselolei	0.9700072139345436
ASV_472	d__Bacteria;p__Firmicutes;c__Bacilli;o__Bacillales;f__Planococcaceae;g__unclassified_Planococcaceae;s__unclassified_Planococcaceae	0.8449968057343787
ASV_473	d__Bacteria;p__Firmicutes;c__Clostridia;o__Clostridiales;f__Peptostreptococcaceae;g__Clostridium;s__Clostridium_ruminantium	0.8743073585132273
ASV_474	d__Bacteria;p__Firmicutes;c__Clostridia;o__Clostridiales;f__unidentified_Clostridiales;g__unidentified_Clostridiales;s__unidentified_Clostridiales	0.9913558933711678
ASV_475	d__Bacteria;p__Bacteroidetes;c__Sphingobacteriia;o__Sphingobacteriales;f__Sphingobacteriaceae;g__unidentified_Sphingobacteriaceae;s__unidentified_Sphingobacteriaceae	0.950490764424778
ASV_476	d__Bacteria;p__Firmicutes;c__Clostridia;o__Clostridiales;f__unidentified_Clostridiales;g__unidentified_Clostridiales;s__unidentified_Clostridiales	0.7828069975696994
ASV_477	d__Bacteria;p__Firmicutes;c__Bacilli;o__Bacillales;f__Bacillaceae;g__Bacillus;s__unidentified_Bacillus	0.8208002162091776
ASV_478	d__Bacteria;p__Bacteroidetes;c__Bacteroidia;o__Bacteroidales;f__Prevotellaceae;g__Prevotella;s__unidentified_Prevotella	0.9997562067409331
ASV_479	d__Bacteria;p__Firmicutes;c__Clostridia;o__Clostridiales;f__unclassified_Clostridiales;g__unclassified_Clostridiales;s__unclassified_Clostridiales	0.9999995831408346
ASV_480	d__Bacteria;p__Firmicutes;c__Clostridia;o__Clostridiales;f__Clostridiaceae;g__Clostridium;s__unidentified_Clostridium	0.7152420912063369
ASV_481	d__Bacteria;p__Bacteroidetes;c__Bacteroidia;o__Bacteroidales;f__S24-7;g__unidentified_S24-7;s__unidentified_S24-7	0.9999999191858852
ASV_482	d__Bacteria;p__Firmicutes;c__Clostridia;o__Clostridiales;f__Lachnospiraceae;g__unclassified_Lachnospiraceae;s__unclassified_Lachnospiraceae	0.998936243660597
ASV_483	d__Bacteria;p__Proteobacteria;c__Gammaproteobacteria;o__Xanthomonadales;f__Xanthomonadaceae;g__Luteibacter;s__unidentified_Luteibacter	0.7196584432451787
ASV_484	d__Bacteria;p__Firmicutes;c__Bacilli;o__Lactobacillales;f__Lactobacillaceae;g__Lactobacillus;s__unidentified_Lactobacillus	0.9892000606785424
ASV_485	d__Bacteria;p__Proteobacteria;c__Alphaproteobacteria;o__Rhodobacterales;f__Rhodobacteraceae;g__Rhodobacter;s__unidentified_Rhodobacter	0.9978425363466668
ASV_486	d__Bacteria;p__Bacteroidetes;c__Bacteroidia;o__Bacteroidales;f__unidentified_Bacteroidales;g__unidentified_Bacteroidales;s__unidentified_Bacteroidales	0.7665059390713594
ASV_487	d__Bacteria;p__Firmicutes;c__Clostridia;o__Clostridiales;f__Ruminococcaceae;g__Oscillospira;s__unidentified_Oscillospira	0.8801512478461593
ASV_488	d__Bacteria;p__Actinobacteria;c__Actinobacteria;o__Actinomycetales;f__Thermomonosporaceae;g__Actinoallomurus;s__Actinoallomurus_iriomotensis	0.7862862048828702
ASV_489	d__Bacteria;p__Bacteroidetes;c__Bacteroidia;o__Bacteroidales;f__Prevotellaceae;g__unidentified_Prevotellaceae;s__unidentified_Prevotellaceae	0.7496432759210159
ASV_490	d__Bacteria;p__Firmicutes;c__Clostridia;o__Clostridiales;f__Clostridiaceae;g__Clostridium;s__unclassified_Clostridium	0.7803347431918414
ASV_491	d__Bacteria;p__Firmicutes;c__Clostridia;o__Clostridiales;f__unclassified_Clostridiales;g__unclassified_Clostridiales;s__unclassified_Clostridiales	0.9999999998781675
ASV_492	d__Bacteria;p__Firmicutes;c__Clostridia;o__Clostridiales;f__unidentified_Clostridiales;g__unidentified_Clostridiales;s__unidentified_Clostridiales	0.9880695127108118
ASV_493	d__Bacteria;p__Proteobacteria;c__Betaproteobacteria;o__Burkholderiales;f__Burkholderiaceae;g__unclassified_Burkholderiaceae;s__unclassified_Burkholderiaceae	0.7772632374023838
ASV_494	d__Bacteria;p__Proteobacteria;c__Deltaproteobacteria;o__Bdellovibrionales;f__Bacteriovoracaceae;g__Peredibacter;s__Peredibacter_starrii	0.9995395714013212
ASV_495	d__Bacteria;p__Firmicutes;c__Clostridia;o__Clostridiales;f__unidentified_Clostridiales;g__unidentified_Clostridiales;s__unidentified_Clostridiales	0.9859402451959445
ASV_496	d__Bacteria;p__Firmicutes;c__Clostridia;o__Clostridiales;f__unidentified_Clostridiales;g__unidentified_Clostridiales;s__unidentified_Clostridiales	0.8424687215183126
ASV_497	d__Bacteria;p__Firmicutes;c__Clostridia;o__Clostridiales;f__Ruminococcaceae;g__Oscillospira;s__unidentified_Oscillospira	0.9427009223465472
ASV_498	d__Bacteria;p__Actinobacteria;c__Actinobacteria;o__Actinomycetales;f__Micromonosporaceae;g__unclassified_Micromonosporaceae;s__unclassified_Micromonosporaceae	0.9156031590036284
ASV_499	d__Bacteria;p__Firmicutes;c__Bacilli;o__Lactobacillales;f__Lactobacillaceae;g__Lactobacillus;s__Lactobacillus_paraplantarum	0.739637676049648
ASV_500	d__Bacteria;p__Bacteroidetes;c__Bacteroidia;o__Bacteroidales;f__Prevotellaceae;g__Prevotella;s__unidentified_Prevotella	0.9998465985917881
ASV_501	d__Bacteria;p__Firmicutes;c__Clostridia;o__Clostridiales;f__Ruminococcaceae;g__unidentified_Ruminococcaceae;s__unidentified_Ruminococcaceae	0.9897160221320248
ASV_502	d__Bacteria;p__Proteobacteria;c__Alphaproteobacteria;o__unidentified_Alphaproteobacteria;f__unidentified_Alphaproteobacteria;g__unidentified_Alphaproteobacteria;s__unidentified_Alphaproteobacteria	0.7929632112103652
ASV_503	d__Bacteria;p__Actinobacteria;c__Acidimicrobiia;o__Acidimicrobiales;f__unidentified_Acidimicrobiales;g__unidentified_Acidimicrobiales;s__unidentified_Acidimicrobiales	0.9998523343307687
ASV_504	d__Bacteria;p__Acidobacteria;c__Solibacteres;o__Solibacterales;f__unidentified_Solibacterales;g__unidentified_Solibacterales;s__unidentified_Solibacterales	0.9991932691437513
ASV_505	d__Bacteria;p__Firmicutes;c__Clostridia;o__Clostridiales;f__unidentified_Clostridiales;g__unidentified_Clostridiales;s__unidentified_Clostridiales	0.9999240106976688
ASV_506	d__Bacteria;p__Firmicutes;c__Bacilli;o__Bacillales;f__Bacillaceae;g__unclassified_Bacillaceae;s__unclassified_Bacillaceae	0.7586213584689168
ASV_507	d__Bacteria;p__Firmicutes;c__Clostridia;o__Clostridiales;f__Lachnospiraceae;g__unidentified_Lachnospiraceae;s__unidentified_Lachnospiraceae	0.9072291186191982
ASV_508	d__Bacteria;p__unclassified_Bacteria;c__unclassified_Bacteria;o__unclassified_Bacteria;f__unclassified_Bacteria;g__unclassified_Bacteria;s__unclassified_Bacteria	0.9999999998622594
ASV_509	d__Bacteria;p__Bacteroidetes;c__Bacteroidia;o__Bacteroidales;f__unidentified_Bacteroidales;g__unidentified_Bacteroidales;s__unidentified_Bacteroidales	0.997768733853388
ASV_510	d__Bacteria;p__Firmicutes;c__Clostridia;o__Clostridiales;f__Peptostreptococcaceae;g__unidentified_Peptostreptococcaceae;s__unidentified_Peptostreptococcaceae	0.8431599752238084
ASV_511	d__Bacteria;p__Firmicutes;c__Clostridia;o__Clostridiales;f__Peptostreptococcaceae;g__Clostridium;s__Clostridium_ruminantium	0.7923927796488577
ASV_512	d__Bacteria;p__Firmicutes;c__Clostridia;o__Clostridiales;f__Lachnospiraceae;g__unidentified_Lachnospiraceae;s__unidentified_Lachnospiraceae	0.8937780955980485
ASV_513	d__Bacteria;p__Firmicutes;c__Clostridia;o__Clostridiales;f__unclassified_Clostridiales;g__unclassified_Clostridiales;s__unclassified_Clostridiales	0.999999999792279
ASV_514	d__Bacteria;p__Firmicutes;c__Clostridia;o__Clostridiales;f__unidentified_Clostridiales;g__unidentified_Clostridiales;s__unidentified_Clostridiales	0.9999063211731932
ASV_515	d__Bacteria;p__Bacteroidetes;c__Bacteroidia;o__Bacteroidales;f__unidentified_Bacteroidales;g__unidentified_Bacteroidales;s__unidentified_Bacteroidales	0.9993209844894345
ASV_516	d__Bacteria;p__Proteobacteria;c__Gammaproteobacteria;o__Pseudomonadales;f__Moraxellaceae;g__unidentified_Moraxellaceae;s__unidentified_Moraxellaceae	0.9821353408843223
ASV_517	d__Bacteria;p__Nitrospirae;c__Nitrospira;o__Nitrospirales;f__0319-6A21;g__unidentified_0319-6A21;s__unidentified_0319-6A21	0.9588060330038193
ASV_518	d__Bacteria;p__Actinobacteria;c__Actinobacteria;o__Bifidobacteriales;f__Bifidobacteriaceae;g__Bifidobacterium;s__Bifidobacterium_longum	0.9901188909795986
ASV_519	d__Bacteria;p__Proteobacteria;c__Gammaproteobacteria;o__Xanthomonadales;f__Xanthomonadaceae;g__unclassified_Xanthomonadaceae;s__unclassified_Xanthomonadaceae	0.929733174890595
ASV_520	d__Bacteria;p__Firmicutes;c__Clostridia;o__Clostridiales;f__Peptostreptococcaceae;g__unidentified_Peptostreptococcaceae;s__unidentified_Peptostreptococcaceae	0.7738729936093423
ASV_521	d__Bacteria;p__Firmicutes;c__Bacilli;o__Lactobacillales;f__Lactobacillaceae;g__Lactobacillus;s__unidentified_Lactobacillus	0.9997210202164585
ASV_522	d__Bacteria;p__Firmicutes;c__Clostridia;o__Clostridiales;f__unclassified_Clostridiales;g__unclassified_Clostridiales;s__unclassified_Clostridiales	0.9999959160738948
ASV_523	d__Bacteria;p__Firmicutes;c__Clostridia;o__Clostridiales;f__unidentified_Clostridiales;g__unidentified_Clostridiales;s__unidentified_Clostridiales	0.9983440305702587
ASV_524	d__Bacteria;p__Proteobacteria;c__Gammaproteobacteria;o__Pseudomonadales;f__Moraxellaceae;g__Acinetobacter;s__unidentified_Acinetobacter	0.9494080793279054
ASV_525	d__Bacteria;p__Actinobacteria;c__Thermoleophilia;o__Gaiellales;f__Gaiellaceae;g__unidentified_Gaiellaceae;s__unidentified_Gaiellaceae	0.9999733055096084
ASV_526	d__Bacteria;p__Firmicutes;c__Clostridia;o__Clostridiales;f__Clostridiaceae;g__Clostridium;s__unidentified_Clostridium	0.8574773315729123
ASV_527	d__Bacteria;p__Proteobacteria;c__Gammaproteobacteria;o__Xanthomonadales;f__Xanthomonadaceae;g__unclassified_Xanthomonadaceae;s__unclassified_Xanthomonadaceae	0.9451968557597207
ASV_528	d__Bacteria;p__Firmicutes;c__Clostridia;o__Clostridiales;f__Clostridiaceae;g__Clostridium;s__Clostridium_baratii	0.731444344491857
ASV_529	d__Bacteria;p__unclassified_Bacteria;c__unclassified_Bacteria;o__unclassified_Bacteria;f__unclassified_Bacteria;g__unclassified_Bacteria;s__unclassified_Bacteria	0.9999999999351952
ASV_530	d__Bacteria;p__Firmicutes;c__Clostridia;o__Clostridiales;f__unidentified_Clostridiales;g__unidentified_Clostridiales;s__unidentified_Clostridiales	0.999935488249142
ASV_531	d__Bacteria;p__Firmicutes;c__Clostridia;o__Clostridiales;f__Lachnospiraceae;g__unidentified_Lachnospiraceae;s__unidentified_Lachnospiraceae	0.9401081127857385
ASV_532	d__Bacteria;p__Proteobacteria;c__Alphaproteobacteria;o__Rhizobiales;f__Rhizobiaceae;g__Shinella;s__Shinella_granuli	0.941430318560096
ASV_533	d__Bacteria;p__Firmicutes;c__Clostridia;o__Clostridiales;f__unidentified_Clostridiales;g__unidentified_Clostridiales;s__unidentified_Clostridiales	0.9858213743872907
ASV_534	d__Bacteria;p__Fusobacteria;c__Fusobacteriia;o__Fusobacteriales;f__Fusobacteriaceae;g__Cetobacterium;s__unidentified_Cetobacterium	0.9441789738940058
ASV_535	d__Bacteria;p__Firmicutes;c__Clostridia;o__Clostridiales;f__unclassified_Clostridiales;g__unclassified_Clostridiales;s__unclassified_Clostridiales	0.9998167624889808
ASV_536	d__Bacteria;p__Bacteroidetes;c__Bacteroidia;o__Bacteroidales;f__Rikenellaceae;g__Alistipes;s__Alistipes_finegoldii	0.8194995214663079
ASV_537	d__Bacteria;p__Firmicutes;c__Bacilli;o__Lactobacillales;f__Lactobacillaceae;g__Lactobacillus;s__unidentified_Lactobacillus	0.999127937416379
ASV_538	d__Bacteria;p__Bacteroidetes;c__Bacteroidia;o__Bacteroidales;f__S24-7;g__unidentified_S24-7;s__unidentified_S24-7	0.9999997318594542
ASV_539	d__Bacteria;p__Cyanobacteria;c__Chloroplast;o__Streptophyta;f__unidentified_Streptophyta;g__unidentified_Streptophyta;s__unidentified_Streptophyta	0.999999998572207
ASV_540	d__Bacteria;p__Firmicutes;c__Clostridia;o__Clostridiales;f__Lachnospiraceae;g__unidentified_Lachnospiraceae;s__unidentified_Lachnospiraceae	0.8509387446584048
ASV_541	d__Bacteria;p__Firmicutes;c__Clostridia;o__Clostridiales;f__unidentified_Clostridiales;g__unidentified_Clostridiales;s__unidentified_Clostridiales	0.9998992917629878
ASV_542	d__Bacteria;p__unidentified_Bacteria;c__unidentified_Bacteria;o__unidentified_Bacteria;f__unidentified_Bacteria;g__unidentified_Bacteria;s__unidentified_Bacteria	0.9466560247476005
ASV_543	d__Bacteria;p__Proteobacteria;c__Alphaproteobacteria;o__Caulobacterales;f__Caulobacteraceae;g__unclassified_Caulobacteraceae;s__unclassified_Caulobacteraceae	0.9999999955101219
ASV_544	d__Bacteria;p__Proteobacteria;c__Betaproteobacteria;o__Burkholderiales;f__Comamonadaceae;g__unclassified_Comamonadaceae;s__unclassified_Comamonadaceae	0.99392607331168
ASV_545	d__Bacteria;p__Firmicutes;c__Clostridia;o__Clostridiales;f__Ruminococcaceae;g__unidentified_Ruminococcaceae;s__unidentified_Ruminococcaceae	0.9783267553737186
ASV_546	d__Bacteria;p__Firmicutes;c__Clostridia;o__Clostridiales;f__[Tissierellaceae];g__Sedimentibacter;s__unidentified_Sedimentibacter	0.9555168207449619
ASV_547	d__Bacteria;p__Cyanobacteria;c__Chloroplast;o__Streptophyta;f__unidentified_Streptophyta;g__unidentified_Streptophyta;s__unidentified_Streptophyta	0.9905921904423288
ASV_548	d__Bacteria;p__Proteobacteria;c__Alphaproteobacteria;o__Caulobacterales;f__Caulobacteraceae;g__Brevundimonas;s__unclassified_Brevundimonas	0.7974096409111778
ASV_549	d__Bacteria;p__Firmicutes;c__Clostridia;o__Clostridiales;f__Ruminococcaceae;g__unidentified_Ruminococcaceae;s__unidentified_Ruminococcaceae	0.9992938501563138
ASV_550	d__Bacteria;p__Actinobacteria;c__Actinobacteria;o__Bifidobacteriales;f__Bifidobacteriaceae;g__Bifidobacterium;s__Bifidobacterium_pseudolongum	0.9953824583098042
ASV_551	d__Bacteria;p__Proteobacteria;c__Gammaproteobacteria;o__Xanthomonadales;f__Xanthomonadaceae;g__unclassified_Xanthomonadaceae;s__unclassified_Xanthomonadaceae	0.9620008247731388
ASV_552	d__Bacteria;p__Firmicutes;c__Clostridia;o__Clostridiales;f__Ruminococcaceae;g__unidentified_Ruminococcaceae;s__unidentified_Ruminococcaceae	0.8851263138151663
ASV_553	d__Bacteria;p__Proteobacteria;c__Betaproteobacteria;o__Nitrosomonadales;f__Nitrosomonadaceae;g__Nitrosovibrio;s__unclassified_Nitrosovibrio	0.7724233879491451
ASV_554	d__Bacteria;p__Proteobacteria;c__Gammaproteobacteria;o__Pseudomonadales;f__Moraxellaceae;g__unidentified_Moraxellaceae;s__unidentified_Moraxellaceae	0.8861419547639641
ASV_555	d__Bacteria;p__Firmicutes;c__Clostridia;o__Clostridiales;f__Ruminococcaceae;g__unidentified_Ruminococcaceae;s__unidentified_Ruminococcaceae	0.7508251547360182
ASV_556	d__Bacteria;p__Firmicutes;c__Clostridia;o__Clostridiales;f__unclassified_Clostridiales;g__unclassified_Clostridiales;s__unclassified_Clostridiales	0.9999999990309357
ASV_557	d__Bacteria;p__Firmicutes;c__Clostridia;o__Clostridiales;f__unclassified_Clostridiales;g__unclassified_Clostridiales;s__unclassified_Clostridiales	0.9999555046749471
ASV_558	d__Bacteria;p__Firmicutes;c__Clostridia;o__Clostridiales;f__Lachnospiraceae;g__unidentified_Lachnospiraceae;s__unidentified_Lachnospiraceae	0.7983586722191485
ASV_559	d__Bacteria;p__Proteobacteria;c__Alphaproteobacteria;o__Sphingomonadales;f__Sphingomonadaceae;g__Kaistobacter;s__unidentified_Kaistobacter	0.9951540603590333
ASV_560	d__Bacteria;p__Cyanobacteria;c__Chloroplast;o__Stramenopiles;f__unidentified_Stramenopiles;g__unidentified_Stramenopiles;s__unidentified_Stramenopiles	0.999999907472703
ASV_561	d__Bacteria;p__Bacteroidetes;c__Bacteroidia;o__Bacteroidales;f__Bacteroidaceae;g__Bacteroides;s__Bacteroides_fragilis	0.9999244081500384
ASV_562	d__Bacteria;p__Firmicutes;c__Clostridia;o__Clostridiales;f__Ruminococcaceae;g__unidentified_Ruminococcaceae;s__unidentified_Ruminococcaceae	0.7926998547294398
ASV_563	d__Bacteria;p__Bacteroidetes;c__Flavobacteriia;o__Flavobacteriales;f__Flavobacteriaceae;g__Flavobacterium;s__unidentified_Flavobacterium	0.8884077405199199
ASV_564	d__Bacteria;p__Proteobacteria;c__Betaproteobacteria;o__Burkholderiales;f__Comamonadaceae;g__unclassified_Comamonadaceae;s__unclassified_Comamonadaceae	0.9997316151486938
ASV_565	d__Bacteria;p__Firmicutes;c__Clostridia;o__Clostridiales;f__Lachnospiraceae;g__unclassified_Lachnospiraceae;s__unclassified_Lachnospiraceae	0.9709436258189139
ASV_566	d__Bacteria;p__unidentified_Bacteria;c__unidentified_Bacteria;o__unidentified_Bacteria;f__unidentified_Bacteria;g__unidentified_Bacteria;s__unidentified_Bacteria	0.9960582456467375
ASV_567	d__Bacteria;p__Firmicutes;c__Bacilli;o__Bacillales;f__Bacillaceae;g__Anoxybacillus;s__unclassified_Anoxybacillus	0.9909150706298412
ASV_568	d__Bacteria;p__Firmicutes;c__Clostridia;o__Clostridiales;f__unclassified_Clostridiales;g__unclassified_Clostridiales;s__unclassified_Clostridiales	0.9999999986883424
ASV_569	d__Bacteria;p__Proteobacteria;c__Betaproteobacteria;o__Burkholderiales;f__Comamonadaceae;g__unclassified_Comamonadaceae;s__unclassified_Comamonadaceae	0.9912229406853201
ASV_570	d__Bacteria;p__Firmicutes;c__Bacilli;o__Lactobacillales;f__Lactobacillaceae;g__Lactobacillus;s__unidentified_Lactobacillus	0.9663397297275044
ASV_571	d__Bacteria;p__Proteobacteria;c__unclassified_Proteobacteria;o__unclassified_Proteobacteria;f__unclassified_Proteobacteria;g__unclassified_Proteobacteria;s__unclassified_Proteobacteria	0.999839851292348
ASV_572	d__Bacteria;p__Firmicutes;c__Clostridia;o__Clostridiales;f__Christensenellaceae;g__unidentified_Christensenellaceae;s__unidentified_Christensenellaceae	0.7264096685070154
ASV_573	d__Bacteria;p__Actinobacteria;c__Actinobacteria;o__Actinomycetales;f__Corynebacteriaceae;g__Corynebacterium;s__unidentified_Corynebacterium	0.8633496679711974
ASV_574	d__Bacteria;p__Proteobacteria;c__Alphaproteobacteria;o__Rhizobiales;f__unidentified_Rhizobiales;g__unidentified_Rhizobiales;s__unidentified_Rhizobiales	0.7529666609979682
ASV_575	d__Bacteria;p__Proteobacteria;c__Alphaproteobacteria;o__Caulobacterales;f__Caulobacteraceae;g__Brevundimonas;s__unclassified_Brevundimonas	0.7983563216477725
ASV_576	d__Bacteria;p__Proteobacteria;c__Alphaproteobacteria;o__Caulobacterales;f__Caulobacteraceae;g__Caulobacter;s__Caulobacter_vibrioides	0.9981310397837508
ASV_577	d__Bacteria;p__Bacteroidetes;c__Bacteroidia;o__Bacteroidales;f__unclassified_Bacteroidales;g__unclassified_Bacteroidales;s__unclassified_Bacteroidales	0.9999938167503499
ASV_578	d__Bacteria;p__Proteobacteria;c__Betaproteobacteria;o__Burkholderiales;f__Comamonadaceae;g__unclassified_Comamonadaceae;s__unclassified_Comamonadaceae	0.9987184917655243
ASV_579	d__Bacteria;p__Firmicutes;c__Clostridia;o__Clostridiales;f__Ruminococcaceae;g__unidentified_Ruminococcaceae;s__unidentified_Ruminococcaceae	0.9991736418543644
ASV_580	d__Bacteria;p__Firmicutes;c__Clostridia;o__Clostridiales;f__unidentified_Clostridiales;g__unidentified_Clostridiales;s__unidentified_Clostridiales	0.9487342644010934
ASV_581	d__Bacteria;p__Gemmatimonadetes;c__Gemmatimonadetes;o__unidentified_Gemmatimonadetes;f__unidentified_Gemmatimonadetes;g__unidentified_Gemmatimonadetes;s__unidentified_Gemmatimonadetes	0.9975331944042022
ASV_582	d__Bacteria;p__Firmicutes;c__Clostridia;o__Clostridiales;f__Ruminococcaceae;g__unidentified_Ruminococcaceae;s__unidentified_Ruminococcaceae	0.9202505853975833
ASV_583	d__Bacteria;p__unclassified_Bacteria;c__unclassified_Bacteria;o__unclassified_Bacteria;f__unclassified_Bacteria;g__unclassified_Bacteria;s__unclassified_Bacteria	0.9999999999996209
ASV_584	d__Bacteria;p__Firmicutes;c__Bacilli;o__Bacillales;f__Bacillaceae;g__Bacillus;s__unclassified_Bacillus	0.9139811848655823
ASV_585	d__Bacteria;p__Firmicutes;c__Clostridia;o__Clostridiales;f__unclassified_Clostridiales;g__unclassified_Clostridiales;s__unclassified_Clostridiales	0.7617658845167481
ASV_586	d__Bacteria;p__Firmicutes;c__Clostridia;o__Clostridiales;f__unidentified_Clostridiales;g__unidentified_Clostridiales;s__unidentified_Clostridiales	0.999775563292511
ASV_587	d__Bacteria;p__Actinobacteria;c__Coriobacteriia;o__Coriobacteriales;f__Coriobacteriaceae;g__unclassified_Coriobacteriaceae;s__unclassified_Coriobacteriaceae	0.9539614429056297
ASV_588	d__Bacteria;p__Proteobacteria;c__Alphaproteobacteria;o__Rhizobiales;f__Bradyrhizobiaceae;g__Bosea;s__Bosea_genosp.	0.951560154540472
ASV_589	d__Bacteria;p__Firmicutes;c__Clostridia;o__Clostridiales;f__Ruminococcaceae;g__unidentified_Ruminococcaceae;s__unidentified_Ruminococcaceae	0.8228094300664255
ASV_590	d__Bacteria;p__Bacteroidetes;c__Bacteroidia;o__Bacteroidales;f__S24-7;g__unidentified_S24-7;s__unidentified_S24-7	0.9999999968206623
ASV_591	d__Bacteria;p__Chloroflexi;c__TK17;o__mle1-48;f__unidentified_mle1-48;g__unidentified_mle1-48;s__unidentified_mle1-48	0.9999999969707858
ASV_592	d__Bacteria;p__Firmicutes;c__Clostridia;o__Clostridiales;f__Lachnospiraceae;g__[Ruminococcus];s__[Ruminococcus]_gnavus	0.7894721228075171
ASV_593	d__Bacteria;p__Firmicutes;c__Erysipelotrichi;o__Erysipelotrichales;f__Erysipelotrichaceae;g__unidentified_Erysipelotrichaceae;s__unidentified_Erysipelotrichaceae	0.9599783564571055
ASV_594	d__Bacteria;p__Firmicutes;c__Clostridia;o__Clostridiales;f__unidentified_Clostridiales;g__unidentified_Clostridiales;s__unidentified_Clostridiales	0.8536638439646361
ASV_595	d__Bacteria;p__Firmicutes;c__Clostridia;o__Clostridiales;f__unclassified_Clostridiales;g__unclassified_Clostridiales;s__unclassified_Clostridiales	0.9999852674240868
ASV_596	d__Bacteria;p__Firmicutes;c__Bacilli;o__Bacillales;f__Bacillaceae;g__unclassified_Bacillaceae;s__unclassified_Bacillaceae	0.8170084605208153
ASV_597	d__Bacteria;p__Bacteroidetes;c__Bacteroidia;o__Bacteroidales;f__Prevotellaceae;g__unidentified_Prevotellaceae;s__unidentified_Prevotellaceae	0.9641355947439968
ASV_598	d__Bacteria;p__Proteobacteria;c__Betaproteobacteria;o__Burkholderiales;f__Oxalobacteraceae;g__unclassified_Oxalobacteraceae;s__unclassified_Oxalobacteraceae	0.9999997036532262
ASV_599	d__Bacteria;p__Bacteroidetes;c__Bacteroidia;o__Bacteroidales;f__Prevotellaceae;g__Prevotella;s__unidentified_Prevotella	0.9996937592360959
ASV_600	d__Bacteria;p__Firmicutes;c__Clostridia;o__Clostridiales;f__Lachnospiraceae;g__Coprococcus;s__unidentified_Coprococcus	0.9610467238526174
ASV_601	d__Bacteria;p__Firmicutes;c__Clostridia;o__Clostridiales;f__unidentified_Clostridiales;g__unidentified_Clostridiales;s__unidentified_Clostridiales	0.9999267398233603
ASV_602	d__Bacteria;p__Firmicutes;c__Clostridia;o__Clostridiales;f__Lachnospiraceae;g__unidentified_Lachnospiraceae;s__unidentified_Lachnospiraceae	0.9488993447021029
ASV_603	d__Bacteria;p__Firmicutes;c__Clostridia;o__Clostridiales;f__unclassified_Clostridiales;g__unclassified_Clostridiales;s__unclassified_Clostridiales	0.9594985768372237
ASV_604	d__Bacteria;p__Firmicutes;c__Bacilli;o__Lactobacillales;f__Lactobacillaceae;g__unclassified_Lactobacillaceae;s__unclassified_Lactobacillaceae	0.9961781767955163
ASV_605	d__Bacteria;p__Proteobacteria;c__Gammaproteobacteria;o__Enterobacteriales;f__Enterobacteriaceae;g__unclassified_Enterobacteriaceae;s__unclassified_Enterobacteriaceae	0.9632752823315078
ASV_606	d__Bacteria;p__Proteobacteria;c__Alphaproteobacteria;o__Caulobacterales;f__Caulobacteraceae;g__Caulobacter;s__Caulobacter_vibrioides	0.9891295684593088
ASV_607	d__Bacteria;p__Bacteroidetes;c__Bacteroidia;o__Bacteroidales;f__S24-7;g__unidentified_S24-7;s__unidentified_S24-7	0.9999979165446679
ASV_608	d__Bacteria;p__Firmicutes;c__Clostridia;o__Clostridiales;f__Ruminococcaceae;g__Ruminococcus;s__unidentified_Ruminococcus	0.9998034907380581
ASV_609	d__Bacteria;p__Firmicutes;c__Clostridia;o__Clostridiales;f__Ruminococcaceae;g__unidentified_Ruminococcaceae;s__unidentified_Ruminococcaceae	0.9669249310292467
ASV_610	d__Bacteria;p__Proteobacteria;c__Alphaproteobacteria;o__Caulobacterales;f__Caulobacteraceae;g__Brevundimonas;s__unidentified_Brevundimonas	0.9908240832697691
ASV_611	d__Bacteria;p__Firmicutes;c__Clostridia;o__Clostridiales;f__unidentified_Clostridiales;g__unidentified_Clostridiales;s__unidentified_Clostridiales	0.7370990039308175
ASV_612	d__Bacteria;p__Firmicutes;c__Clostridia;o__Clostridiales;f__Veillonellaceae;g__unidentified_Veillonellaceae;s__unidentified_Veillonellaceae	0.9985664627918707
ASV_613	d__Bacteria;p__Proteobacteria;c__Betaproteobacteria;o__Burkholderiales;f__Burkholderiaceae;g__Burkholderia;s__Burkholderia_gladioli	0.9116811001861588
ASV_614	d__Bacteria;p__Firmicutes;c__Clostridia;o__Clostridiales;f__unclassified_Clostridiales;g__unclassified_Clostridiales;s__unclassified_Clostridiales	0.9995849693418004
ASV_615	d__Bacteria;p__Firmicutes;c__Clostridia;o__Clostridiales;f__unclassified_Clostridiales;g__unclassified_Clostridiales;s__unclassified_Clostridiales	0.9999945135923358
ASV_616	d__Bacteria;p__unclassified_Bacteria;c__unclassified_Bacteria;o__unclassified_Bacteria;f__unclassified_Bacteria;g__unclassified_Bacteria;s__unclassified_Bacteria	0.9999999999824283
ASV_617	d__Bacteria;p__Firmicutes;c__Clostridia;o__Clostridiales;f__Lachnospiraceae;g__unclassified_Lachnospiraceae;s__unclassified_Lachnospiraceae	0.9868796647597746
ASV_618	d__Bacteria;p__Proteobacteria;c__Gammaproteobacteria;o__Xanthomonadales;f__Xanthomonadaceae;g__Lysobacter;s__Lysobacter_pocheonensis	0.9071030112183307
ASV_619	d__Bacteria;p__Firmicutes;c__Bacilli;o__Lactobacillales;f__Streptococcaceae;g__Streptococcus;s__unclassified_Streptococcus	0.703033865312663
ASV_620	d__Bacteria;p__Bacteroidetes;c__Bacteroidia;o__Bacteroidales;f__Prevotellaceae;g__unidentified_Prevotellaceae;s__unidentified_Prevotellaceae	0.9657951554337374
ASV_621	d__Bacteria;p__Firmicutes;c__Clostridia;o__Clostridiales;f__Ruminococcaceae;g__unidentified_Ruminococcaceae;s__unidentified_Ruminococcaceae	0.9504573946172915
ASV_622	d__Bacteria;p__Firmicutes;c__Clostridia;o__Clostridiales;f__unidentified_Clostridiales;g__unidentified_Clostridiales;s__unidentified_Clostridiales	0.9842256183441963
ASV_623	d__Bacteria;p__Tenericutes;c__Mollicutes;o__RF39;f__unidentified_RF39;g__unidentified_RF39;s__unidentified_RF39	0.9999999986027888
ASV_624	d__Bacteria;p__Firmicutes;c__Clostridia;o__Clostridiales;f__unclassified_Clostridiales;g__unclassified_Clostridiales;s__unclassified_Clostridiales	0.9999999999546554
ASV_625	d__Bacteria;p__Proteobacteria;c__Alphaproteobacteria;o__Rhizobiales;f__Bradyrhizobiaceae;g__Blastobacter;s__Blastobacter_denitrificans	0.8492394192615114
ASV_626	d__Bacteria;p__Bacteroidetes;c__Cytophagia;o__Cytophagales;f__Cytophagaceae;g__unidentified_Cytophagaceae;s__unidentified_Cytophagaceae	0.9999991700762256
ASV_627	d__Bacteria;p__Acidobacteria;c__Acidobacteriia;o__Acidobacteriales;f__Acidobacteriaceae;g__unclassified_Acidobacteriaceae;s__unclassified_Acidobacteriaceae	0.9996075961601419
ASV_628	d__Bacteria;p__Firmicutes;c__Clostridia;o__Clostridiales;f__Ruminococcaceae;g__Ruminococcus;s__unidentified_Ruminococcus	0.9443724632236749
ASV_629	d__Bacteria;p__Proteobacteria;c__Alphaproteobacteria;o__Ellin329;f__unidentified_Ellin329;g__unidentified_Ellin329;s__unidentified_Ellin329	0.9984982366854053
ASV_630	d__Bacteria;p__Proteobacteria;c__Deltaproteobacteria;o__Myxococcales;f__unidentified_Myxococcales;g__unidentified_Myxococcales;s__unidentified_Myxococcales	0.9872078066678156
ASV_631	d__Bacteria;p__Firmicutes;c__Clostridia;o__Clostridiales;f__Ruminococcaceae;g__Oscillospira;s__unidentified_Oscillospira	0.9989489822389462
ASV_632	d__Bacteria;p__Firmicutes;c__Clostridia;o__Clostridiales;f__unidentified_Clostridiales;g__unidentified_Clostridiales;s__unidentified_Clostridiales	0.9941142405446487
ASV_633	d__Bacteria;p__Firmicutes;c__Bacilli;o__Lactobacillales;f__Lactobacillaceae;g__Lactobacillus;s__unclassified_Lactobacillus	0.7242005420009858
ASV_634	d__Bacteria;p__Bacteroidetes;c__Bacteroidia;o__Bacteroidales;f__unclassified_Bacteroidales;g__unclassified_Bacteroidales;s__unclassified_Bacteroidales	0.9999995514320672
ASV_635	d__Bacteria;p__Firmicutes;c__Clostridia;o__Clostridiales;f__Clostridiaceae;g__Clostridium;s__unidentified_Clostridium	0.9981191446334502
ASV_636	d__Bacteria;p__Firmicutes;c__Clostridia;o__Clostridiales;f__Lachnospiraceae;g__unidentified_Lachnospiraceae;s__unidentified_Lachnospiraceae	0.9206624416122297
ASV_637	d__Bacteria;p__Firmicutes;c__Clostridia;o__Clostridiales;f__Ruminococcaceae;g__Ruminococcus;s__unidentified_Ruminococcus	0.8540724277578157
ASV_638	d__Bacteria;p__Firmicutes;c__Clostridia;o__Clostridiales;f__Ruminococcaceae;g__unidentified_Ruminococcaceae;s__unidentified_Ruminococcaceae	0.9848583223986175
ASV_639	d__Bacteria;p__Actinobacteria;c__Actinobacteria;o__Actinomycetales;f__Microbacteriaceae;g__unclassified_Microbacteriaceae;s__unclassified_Microbacteriaceae	0.9997298809533942
ASV_640	d__Bacteria;p__Proteobacteria;c__Betaproteobacteria;o__Burkholderiales;f__Comamonadaceae;g__Pelomonas;s__unclassified_Pelomonas	0.8286952326946169
ASV_641	d__Bacteria;p__Bacteroidetes;c__Bacteroidia;o__Bacteroidales;f__unidentified_Bacteroidales;g__unidentified_Bacteroidales;s__unidentified_Bacteroidales	0.8710880554984108
ASV_642	d__Bacteria;p__Firmicutes;c__Clostridia;o__Clostridiales;f__unidentified_Clostridiales;g__unidentified_Clostridiales;s__unidentified_Clostridiales	0.984809970076839
ASV_643	d__Bacteria;p__Actinobacteria;c__unclassified_Actinobacteria;o__unclassified_Actinobacteria;f__unclassified_Actinobacteria;g__unclassified_Actinobacteria;s__unclassified_Actinobacteria	0.9999895194438542
ASV_644	d__Bacteria;p__Firmicutes;c__Bacilli;o__Lactobacillales;f__Lactobacillaceae;g__Lactobacillus;s__unclassified_Lactobacillus	0.9999886273051228
ASV_645	d__Bacteria;p__Acidobacteria;c__Solibacteres;o__Solibacterales;f__unidentified_Solibacterales;g__unidentified_Solibacterales;s__unidentified_Solibacterales	0.9606325980962225
ASV_646	d__Bacteria;p__Verrucomicrobia;c__[Pedosphaerae];o__[Pedosphaerales];f__Ellin515;g__unidentified_Ellin515;s__unidentified_Ellin515	0.9390864400818194
ASV_647	d__Bacteria;p__Bacteroidetes;c__Bacteroidia;o__Bacteroidales;f__S24-7;g__unidentified_S24-7;s__unidentified_S24-7	0.9998527204705041
ASV_648	d__Bacteria;p__Bacteroidetes;c__Bacteroidia;o__Bacteroidales;f__Bacteroidaceae;g__Bacteroides;s__unidentified_Bacteroides	0.9996678624053613
ASV_649	d__Bacteria;p__Firmicutes;c__Bacilli;o__Turicibacterales;f__Turicibacteraceae;g__Turicibacter;s__unidentified_Turicibacter	0.9999998637332035
ASV_650	d__Bacteria;p__Firmicutes;c__Clostridia;o__Clostridiales;f__unidentified_Clostridiales;g__unidentified_Clostridiales;s__unidentified_Clostridiales	0.97310685503761
ASV_651	d__Bacteria;p__Actinobacteria;c__Actinobacteria;o__Actinomycetales;f__Frankiaceae;g__Kaistibacter;s__Kaistibacter_ginsenosidimutans	0.7405343552833459
ASV_652	d__Bacteria;p__Firmicutes;c__Bacilli;o__Lactobacillales;f__unclassified_Lactobacillales;g__unclassified_Lactobacillales;s__unclassified_Lactobacillales	0.9970751169243703
ASV_653	d__Bacteria;p__Bacteroidetes;c__Bacteroidia;o__Bacteroidales;f__Bacteroidaceae;g__Bacteroides;s__unidentified_Bacteroides	0.9999831814935538
ASV_654	d__Bacteria;p__Firmicutes;c__Clostridia;o__Clostridiales;f__unidentified_Clostridiales;g__unidentified_Clostridiales;s__unidentified_Clostridiales	0.9950814125588415
ASV_655	d__Bacteria;p__Firmicutes;c__Clostridia;o__Clostridiales;f__Clostridiaceae;g__unidentified_Clostridiaceae;s__unidentified_Clostridiaceae	0.8964651943216156
ASV_656	d__Bacteria;p__Proteobacteria;c__Betaproteobacteria;o__unclassified_Betaproteobacteria;f__unclassified_Betaproteobacteria;g__unclassified_Betaproteobacteria;s__unclassified_Betaproteobacteria	0.9641307741476444
ASV_657	d__Bacteria;p__Bacteroidetes;c__Bacteroidia;o__Bacteroidales;f__S24-7;g__unidentified_S24-7;s__unidentified_S24-7	0.9999925293366471
ASV_658	d__Bacteria;p__Firmicutes;c__Bacilli;o__Bacillales;f__Bacillaceae;g__unclassified_Bacillaceae;s__unclassified_Bacillaceae	0.9839249265222711
ASV_659	d__Bacteria;p__Acidobacteria;c__Acidobacteria-6;o__iii1-15;f__unidentified_iii1-15;g__unidentified_iii1-15;s__unidentified_iii1-15	0.9999827959648818
ASV_660	d__Bacteria;p__Firmicutes;c__Bacilli;o__Lactobacillales;f__Streptococcaceae;g__unidentified_Streptococcaceae;s__unidentified_Streptococcaceae	0.9917686376772409
ASV_661	d__Bacteria;p__Bacteroidetes;c__Bacteroidia;o__Bacteroidales;f__S24-7;g__unidentified_S24-7;s__unidentified_S24-7	0.994608732825458
ASV_662	d__Bacteria;p__Bacteroidetes;c__Bacteroidia;o__Bacteroidales;f__Bacteroidaceae;g__Bacteroides;s__unidentified_Bacteroides	0.999685066333512
ASV_663	d__Bacteria;p__Proteobacteria;c__Betaproteobacteria;o__Nitrosomonadales;f__Nitrosomonadaceae;g__Nitrosovibrio;s__Nitrosovibrio_tenuis	0.7033181464476472
ASV_664	d__Bacteria;p__Firmicutes;c__Clostridia;o__Clostridiales;f__Clostridiaceae;g__Clostridium;s__unidentified_Clostridium	0.8750861990612913
ASV_665	d__Bacteria;p__Actinobacteria;c__Actinobacteria;o__Actinomycetales;f__Nocardioidaceae;g__unclassified_Nocardioidaceae;s__unclassified_Nocardioidaceae	0.9967354725505827
ASV_666	d__Bacteria;p__Nitrospirae;c__Nitrospira;o__Nitrospirales;f__0319-6A21;g__unidentified_0319-6A21;s__unidentified_0319-6A21	0.9999999997775433
ASV_667	d__Bacteria;p__Proteobacteria;c__Gammaproteobacteria;o__Xanthomonadales;f__Xanthomonadaceae;g__unclassified_Xanthomonadaceae;s__unclassified_Xanthomonadaceae	0.7560984473036684
ASV_668	d__Bacteria;p__Firmicutes;c__Clostridia;o__Clostridiales;f__unidentified_Clostridiales;g__unidentified_Clostridiales;s__unidentified_Clostridiales	0.9994489164592892
ASV_669	d__Bacteria;p__Firmicutes;c__Clostridia;o__Clostridiales;f__unidentified_Clostridiales;g__unidentified_Clostridiales;s__unidentified_Clostridiales	0.8051357087949322
ASV_670	d__Bacteria;p__Firmicutes;c__Clostridia;o__Clostridiales;f__Clostridiaceae;g__unidentified_Clostridiaceae;s__unidentified_Clostridiaceae	0.76863460976873
ASV_671	d__Bacteria;p__unclassified_Bacteria;c__unclassified_Bacteria;o__unclassified_Bacteria;f__unclassified_Bacteria;g__unclassified_Bacteria;s__unclassified_Bacteria	0.9999999999947619
ASV_672	d__Bacteria;p__unclassified_Bacteria;c__unclassified_Bacteria;o__unclassified_Bacteria;f__unclassified_Bacteria;g__unclassified_Bacteria;s__unclassified_Bacteria	0.9999999999979271
ASV_673	d__Bacteria;p__Firmicutes;c__Clostridia;o__Clostridiales;f__Ruminococcaceae;g__unidentified_Ruminococcaceae;s__unidentified_Ruminococcaceae	0.9329896020221543
ASV_674	d__Bacteria;p__Firmicutes;c__Clostridia;o__Clostridiales;f__Lachnospiraceae;g__unclassified_Lachnospiraceae;s__unclassified_Lachnospiraceae	0.9496942980350721
ASV_675	d__Bacteria;p__Firmicutes;c__Clostridia;o__Clostridiales;f__Clostridiaceae;g__Clostridium;s__unclassified_Clostridium	0.9697911358958415
ASV_676	d__Bacteria;p__Firmicutes;c__Erysipelotrichi;o__Erysipelotrichales;f__Erysipelotrichaceae;g__unidentified_Erysipelotrichaceae;s__unidentified_Erysipelotrichaceae	0.9957708240348934
ASV_677	d__Bacteria;p__Firmicutes;c__Bacilli;o__Lactobacillales;f__Lactobacillaceae;g__Lactobacillus;s__unclassified_Lactobacillus	0.9352140179456119
ASV_678	d__Bacteria;p__Proteobacteria;c__Alphaproteobacteria;o__Sphingomonadales;f__unidentified_Sphingomonadales;g__unidentified_Sphingomonadales;s__unidentified_Sphingomonadales	0.9973852312106873
ASV_679	d__Bacteria;p__Firmicutes;c__Clostridia;o__Clostridiales;f__Ruminococcaceae;g__Ruminococcus;s__unidentified_Ruminococcus	0.8617840906509568
ASV_680	d__Bacteria;p__Firmicutes;c__Clostridia;o__Clostridiales;f__unidentified_Clostridiales;g__unidentified_Clostridiales;s__unidentified_Clostridiales	0.9933557197189865
ASV_681	d__Bacteria;p__Firmicutes;c__Clostridia;o__Clostridiales;f__Peptostreptococcaceae;g__unclassified_Peptostreptococcaceae;s__unclassified_Peptostreptococcaceae	0.9194881400804266
ASV_682	d__Bacteria;p__Proteobacteria;c__Gammaproteobacteria;o__unclassified_Gammaproteobacteria;f__unclassified_Gammaproteobacteria;g__unclassified_Gammaproteobacteria;s__unclassified_Gammaproteobacteria	0.9841509225062066
ASV_683	d__Bacteria;p__Firmicutes;c__Clostridia;o__Clostridiales;f__Ruminococcaceae;g__unidentified_Ruminococcaceae;s__unidentified_Ruminococcaceae	0.8862263579539982
ASV_684	d__Bacteria;p__Proteobacteria;c__Betaproteobacteria;o__Burkholderiales;f__Comamonadaceae;g__unclassified_Comamonadaceae;s__unclassified_Comamonadaceae	0.9559884243498437
ASV_685	d__Bacteria;p__Bacteroidetes;c__Bacteroidia;o__Bacteroidales;f__Bacteroidaceae;g__Bacteroides;s__unidentified_Bacteroides	0.9999943263860386
ASV_686	d__Bacteria;p__Firmicutes;c__Bacilli;o__Bacillales;f__unclassified_Bacillales;g__unclassified_Bacillales;s__unclassified_Bacillales	0.9999889471067849
ASV_687	d__Bacteria;p__Firmicutes;c__Clostridia;o__Clostridiales;f__Veillonellaceae;g__Phascolarctobacterium;s__unidentified_Phascolarctobacterium	0.9914632112297035
ASV_688	d__Bacteria;p__Bacteroidetes;c__Bacteroidia;o__Bacteroidales;f__unidentified_Bacteroidales;g__unidentified_Bacteroidales;s__unidentified_Bacteroidales	0.9999736758450954
ASV_689	d__Bacteria;p__Firmicutes;c__Clostridia;o__Clostridiales;f__unidentified_Clostridiales;g__unidentified_Clostridiales;s__unidentified_Clostridiales	0.9997407724818856
ASV_690	d__Bacteria;p__Firmicutes;c__Clostridia;o__Clostridiales;f__Clostridiaceae;g__unidentified_Clostridiaceae;s__unidentified_Clostridiaceae	0.9796089132374116
ASV_691	d__Bacteria;p__Firmicutes;c__Clostridia;o__Clostridiales;f__Ruminococcaceae;g__Oscillospira;s__unidentified_Oscillospira	0.9990633097246241
ASV_692	d__Bacteria;p__Tenericutes;c__Mollicutes;o__Anaeroplasmatales;f__Anaeroplasmataceae;g__Anaeroplasma;s__unidentified_Anaeroplasma	0.9999999997270663
ASV_693	d__Bacteria;p__Proteobacteria;c__Alphaproteobacteria;o__Rhizobiales;f__unclassified_Rhizobiales;g__unclassified_Rhizobiales;s__unclassified_Rhizobiales	0.8536571267547296
ASV_694	d__Bacteria;p__Proteobacteria;c__Alphaproteobacteria;o__Ellin329;f__unidentified_Ellin329;g__unidentified_Ellin329;s__unidentified_Ellin329	0.9999999484962827
ASV_695	d__Bacteria;p__Firmicutes;c__Clostridia;o__Clostridiales;f__unidentified_Clostridiales;g__unidentified_Clostridiales;s__unidentified_Clostridiales	0.9961764472733532
ASV_696	d__Bacteria;p__Acidobacteria;c__Acidobacteria-6;o__iii1-15;f__unidentified_iii1-15;g__unidentified_iii1-15;s__unidentified_iii1-15	0.943671620663141
ASV_697	d__Bacteria;p__Firmicutes;c__Clostridia;o__Clostridiales;f__Veillonellaceae;g__Megasphaera;s__unidentified_Megasphaera	0.9999999767393322
ASV_698	d__Bacteria;p__Proteobacteria;c__Alphaproteobacteria;o__Rhodospirillales;f__Rhodospirillaceae;g__unidentified_Rhodospirillaceae;s__unidentified_Rhodospirillaceae	0.7056746119729472
ASV_699	d__Bacteria;p__Bacteroidetes;c__Bacteroidia;o__Bacteroidales;f__S24-7;g__unidentified_S24-7;s__unidentified_S24-7	0.9999988282362766
ASV_700	d__Bacteria;p__Bacteroidetes;c__Bacteroidia;o__Bacteroidales;f__S24-7;g__unidentified_S24-7;s__unidentified_S24-7	0.9999983468963783
ASV_701	d__Bacteria;p__Firmicutes;c__Clostridia;o__Clostridiales;f__Lachnospiraceae;g__Blautia;s__unidentified_Blautia	0.7022520567004902
ASV_702	d__Bacteria;p__Firmicutes;c__Bacilli;o__Lactobacillales;f__Streptococcaceae;g__Streptococcus;s__unidentified_Streptococcus	0.9832844980371354
ASV_703	d__Bacteria;p__Actinobacteria;c__Actinobacteria;o__Actinomycetales;f__Streptosporangiaceae;g__Nonomuraea;s__unidentified_Nonomuraea	0.8605680397660743
ASV_704	d__Bacteria;p__Proteobacteria;c__Alphaproteobacteria;o__BD7-3;f__unidentified_BD7-3;g__unidentified_BD7-3;s__unidentified_BD7-3	0.9843610941281601
ASV_705	d__Bacteria;p__Firmicutes;c__Clostridia;o__Clostridiales;f__unclassified_Clostridiales;g__unclassified_Clostridiales;s__unclassified_Clostridiales	0.9990408132935441
ASV_706	d__Bacteria;p__Proteobacteria;c__Betaproteobacteria;o__Burkholderiales;f__Comamonadaceae;g__unclassified_Comamonadaceae;s__unclassified_Comamonadaceae	0.9982377246571598
ASV_707	d__Bacteria;p__Firmicutes;c__Clostridia;o__Clostridiales;f__Peptostreptococcaceae;g__unidentified_Peptostreptococcaceae;s__unidentified_Peptostreptococcaceae	0.9424609354190367
ASV_708	d__Bacteria;p__Firmicutes;c__Clostridia;o__Clostridiales;f__Lachnospiraceae;g__unidentified_Lachnospiraceae;s__unidentified_Lachnospiraceae	0.9438051645141422
ASV_709	d__Bacteria;p__Firmicutes;c__Clostridia;o__Clostridiales;f__unidentified_Clostridiales;g__unidentified_Clostridiales;s__unidentified_Clostridiales	0.8162281202780776
ASV_710	d__Bacteria;p__Firmicutes;c__Clostridia;o__Clostridiales;f__unidentified_Clostridiales;g__unidentified_Clostridiales;s__unidentified_Clostridiales	0.9943856373199758
ASV_711	d__Bacteria;p__Firmicutes;c__Clostridia;o__Clostridiales;f__Ruminococcaceae;g__Oscillospira;s__unidentified_Oscillospira	0.9991481368683784
ASV_712	d__Bacteria;p__Proteobacteria;c__Betaproteobacteria;o__Burkholderiales;f__Oxalobacteraceae;g__Oxalobacter;s__unclassified_Oxalobacter	0.8587439102004026
ASV_713	d__Bacteria;p__Firmicutes;c__Clostridia;o__Clostridiales;f__unidentified_Clostridiales;g__unidentified_Clostridiales;s__unidentified_Clostridiales	0.9999686825945395
ASV_714	d__Bacteria;p__Actinobacteria;c__Actinobacteria;o__Actinomycetales;f__Geodermatophilaceae;g__Blastococcus;s__Blastococcus_saxobsidens	0.9302832444730341
ASV_715	d__Bacteria;p__Proteobacteria;c__Betaproteobacteria;o__Burkholderiales;f__Comamonadaceae;g__unclassified_Comamonadaceae;s__unclassified_Comamonadaceae	0.7932410022442438
ASV_716	d__Bacteria;p__Actinobacteria;c__Thermoleophilia;o__Solirubrobacterales;f__unidentified_Solirubrobacterales;g__unidentified_Solirubrobacterales;s__unidentified_Solirubrobacterales	0.999990028035807
ASV_717	d__Bacteria;p__Proteobacteria;c__Gammaproteobacteria;o__Pseudomonadales;f__Moraxellaceae;g__Psychrobacter;s__unidentified_Psychrobacter	0.9823779615185726
ASV_718	d__Bacteria;p__Firmicutes;c__Clostridia;o__Clostridiales;f__unidentified_Clostridiales;g__unidentified_Clostridiales;s__unidentified_Clostridiales	0.9987922740210522
ASV_719	d__Bacteria;p__Firmicutes;c__Clostridia;o__Clostridiales;f__Ruminococcaceae;g__unidentified_Ruminococcaceae;s__unidentified_Ruminococcaceae	0.7050236219447455
ASV_720	d__Bacteria;p__Firmicutes;c__Clostridia;o__Clostridiales;f__Ruminococcaceae;g__unidentified_Ruminococcaceae;s__unidentified_Ruminococcaceae	0.8883050329299106
ASV_721	d__Bacteria;p__Armatimonadetes;c__OPB50;o__unidentified_OPB50;f__unidentified_OPB50;g__unidentified_OPB50;s__unidentified_OPB50	0.999999983093602
ASV_722	d__Bacteria;p__Firmicutes;c__Clostridia;o__Clostridiales;f__unidentified_Clostridiales;g__unidentified_Clostridiales;s__unidentified_Clostridiales	0.9693270684037926
ASV_723	d__Bacteria;p__Bacteroidetes;c__Bacteroidia;o__Bacteroidales;f__S24-7;g__unidentified_S24-7;s__unidentified_S24-7	0.9986646832496122
ASV_724	d__Bacteria;p__Firmicutes;c__Clostridia;o__Clostridiales;f__unidentified_Clostridiales;g__unidentified_Clostridiales;s__unidentified_Clostridiales	0.9438712498936275
ASV_725	d__Bacteria;p__Bacteroidetes;c__Bacteroidia;o__Bacteroidales;f__p-2534-18B5;g__unidentified_p-2534-18B5;s__unidentified_p-2534-18B5	0.7406522938993038
ASV_726	d__Bacteria;p__Actinobacteria;c__Actinobacteria;o__Actinomycetales;f__unclassified_Actinomycetales;g__unclassified_Actinomycetales;s__unclassified_Actinomycetales	0.9906566059723264
ASV_727	d__Bacteria;p__unidentified_Bacteria;c__unidentified_Bacteria;o__unidentified_Bacteria;f__unidentified_Bacteria;g__unidentified_Bacteria;s__unidentified_Bacteria	0.7715016690330919
ASV_728	d__Bacteria;p__Firmicutes;c__Clostridia;o__Clostridiales;f__Ruminococcaceae;g__Ruminococcus;s__unidentified_Ruminococcus	0.9983954238365674
ASV_729	d__Bacteria;p__Firmicutes;c__Clostridia;o__Clostridiales;f__unidentified_Clostridiales;g__unidentified_Clostridiales;s__unidentified_Clostridiales	0.9999821057769265
ASV_730	d__Bacteria;p__Actinobacteria;c__Actinobacteria;o__Actinomycetales;f__Intrasporangiaceae;g__unclassified_Intrasporangiaceae;s__unclassified_Intrasporangiaceae	0.8336907423490092
ASV_731	d__Bacteria;p__TM7;c__TM7-1;o__unidentified_TM7-1;f__unidentified_TM7-1;g__unidentified_TM7-1;s__unidentified_TM7-1	0.8937722290659149
ASV_732	d__Bacteria;p__Firmicutes;c__Clostridia;o__Clostridiales;f__Ruminococcaceae;g__Oscillospira;s__unidentified_Oscillospira	0.9994263702069629
ASV_733	d__Bacteria;p__Proteobacteria;c__Alphaproteobacteria;o__unclassified_Alphaproteobacteria;f__unclassified_Alphaproteobacteria;g__unclassified_Alphaproteobacteria;s__unclassified_Alphaproteobacteria	0.9997767848391033
ASV_734	d__Bacteria;p__unidentified_Bacteria;c__unidentified_Bacteria;o__unidentified_Bacteria;f__unidentified_Bacteria;g__unidentified_Bacteria;s__unidentified_Bacteria	0.9003326761477273
ASV_735	d__Bacteria;p__Firmicutes;c__Clostridia;o__Clostridiales;f__Ruminococcaceae;g__Oscillospira;s__unidentified_Oscillospira	0.9844647382811264
ASV_736	d__Bacteria;p__Bacteroidetes;c__Bacteroidia;o__Bacteroidales;f__Bacteroidaceae;g__Bacteroides;s__unidentified_Bacteroides	0.9880939157734729
ASV_737	d__Bacteria;p__Firmicutes;c__Clostridia;o__Clostridiales;f__Lachnospiraceae;g__[Ruminococcus];s__[Ruminococcus]_gnavus	0.792265348846547
ASV_738	d__Bacteria;p__Firmicutes;c__Clostridia;o__Clostridiales;f__unidentified_Clostridiales;g__unidentified_Clostridiales;s__unidentified_Clostridiales	0.9990976833018794
ASV_739	d__Bacteria;p__unclassified_Bacteria;c__unclassified_Bacteria;o__unclassified_Bacteria;f__unclassified_Bacteria;g__unclassified_Bacteria;s__unclassified_Bacteria	0.9999999697793547
ASV_740	d__Bacteria;p__Proteobacteria;c__Gammaproteobacteria;o__Enterobacteriales;f__Enterobacteriaceae;g__Shigella;s__unclassified_Shigella	0.78093510062797
ASV_741	d__Bacteria;p__unclassified_Bacteria;c__unclassified_Bacteria;o__unclassified_Bacteria;f__unclassified_Bacteria;g__unclassified_Bacteria;s__unclassified_Bacteria	0.9999999999970814
ASV_742	d__Bacteria;p__Firmicutes;c__Clostridia;o__Clostridiales;f__unidentified_Clostridiales;g__unidentified_Clostridiales;s__unidentified_Clostridiales	0.9998085246118242
ASV_743	d__Bacteria;p__Actinobacteria;c__Actinobacteria;o__Actinomycetales;f__Kineosporiaceae;g__unclassified_Kineosporiaceae;s__unclassified_Kineosporiaceae	0.9359767116262327
ASV_744	d__Bacteria;p__Actinobacteria;c__Actinobacteria;o__Actinomycetales;f__Micrococcaceae;g__Arthrobacter;s__unclassified_Arthrobacter	0.9878643954362315
ASV_745	d__Bacteria;p__Proteobacteria;c__Betaproteobacteria;o__unclassified_Betaproteobacteria;f__unclassified_Betaproteobacteria;g__unclassified_Betaproteobacteria;s__unclassified_Betaproteobacteria	0.9999999813268876
ASV_746	d__Bacteria;p__Firmicutes;c__Clostridia;o__Clostridiales;f__Ruminococcaceae;g__Oscillospira;s__unidentified_Oscillospira	0.9996869545153315
ASV_747	d__Bacteria;p__Actinobacteria;c__Actinobacteria;o__Actinomycetales;f__Microbacteriaceae;g__unclassified_Microbacteriaceae;s__unclassified_Microbacteriaceae	0.9999924981806908
ASV_748	d__Bacteria;p__Actinobacteria;c__Actinobacteria;o__Actinomycetales;f__Microbacteriaceae;g__unclassified_Microbacteriaceae;s__unclassified_Microbacteriaceae	0.9896048999061676
ASV_749	d__Bacteria;p__Proteobacteria;c__Alphaproteobacteria;o__Rhizobiales;f__Bradyrhizobiaceae;g__unclassified_Bradyrhizobiaceae;s__unclassified_Bradyrhizobiaceae	0.9999866518261561
ASV_750	d__Bacteria;p__Firmicutes;c__Clostridia;o__Clostridiales;f__Ruminococcaceae;g__unidentified_Ruminococcaceae;s__unidentified_Ruminococcaceae	0.993965557193238
ASV_751	d__Bacteria;p__Firmicutes;c__Clostridia;o__Clostridiales;f__Clostridiaceae;g__Clostridium;s__Clostridium_baratii	0.872983297773312
ASV_752	d__Bacteria;p__Firmicutes;c__Clostridia;o__Clostridiales;f__Ruminococcaceae;g__unidentified_Ruminococcaceae;s__unidentified_Ruminococcaceae	0.9995767434603253
ASV_753	d__Bacteria;p__Firmicutes;c__Bacilli;o__Lactobacillales;f__Lactobacillaceae;g__Lactobacillus;s__unidentified_Lactobacillus	0.9952436759999291
ASV_754	d__Bacteria;p__Proteobacteria;c__Alphaproteobacteria;o__Rhodospirillales;f__unidentified_Rhodospirillales;g__unidentified_Rhodospirillales;s__unidentified_Rhodospirillales	0.9999991401553816
ASV_755	d__Bacteria;p__Firmicutes;c__Clostridia;o__Clostridiales;f__Clostridiaceae;g__Clostridium;s__Clostridium_disporicum	0.7486953546192954
ASV_756	d__Bacteria;p__Firmicutes;c__Clostridia;o__Clostridiales;f__[Mogibacteriaceae];g__Mogibacterium;s__unidentified_Mogibacterium	0.9999996190171474
ASV_757	d__Bacteria;p__Firmicutes;c__Clostridia;o__Clostridiales;f__unclassified_Clostridiales;g__unclassified_Clostridiales;s__unclassified_Clostridiales	0.9999722103730404
ASV_758	d__Bacteria;p__Firmicutes;c__Clostridia;o__Clostridiales;f__Ruminococcaceae;g__unclassified_Ruminococcaceae;s__unclassified_Ruminococcaceae	0.8767184592563263
ASV_759	d__Bacteria;p__Proteobacteria;c__Betaproteobacteria;o__Burkholderiales;f__unclassified_Burkholderiales;g__unclassified_Burkholderiales;s__unclassified_Burkholderiales	0.9167565910709138
ASV_760	d__Bacteria;p__unclassified_Bacteria;c__unclassified_Bacteria;o__unclassified_Bacteria;f__unclassified_Bacteria;g__unclassified_Bacteria;s__unclassified_Bacteria	0.9999999977981495
ASV_761	d__Bacteria;p__Firmicutes;c__Clostridia;o__Clostridiales;f__unidentified_Clostridiales;g__unidentified_Clostridiales;s__unidentified_Clostridiales	0.9881749632073407
ASV_762	d__Bacteria;p__Firmicutes;c__Bacilli;o__Bacillales;f__unclassified_Bacillales;g__unclassified_Bacillales;s__unclassified_Bacillales	0.7523108433379708
ASV_763	d__Bacteria;p__Firmicutes;c__Clostridia;o__Clostridiales;f__Lachnospiraceae;g__unidentified_Lachnospiraceae;s__unidentified_Lachnospiraceae	0.8928084288775321
ASV_764	d__Bacteria;p__Proteobacteria;c__Alphaproteobacteria;o__unidentified_Alphaproteobacteria;f__unidentified_Alphaproteobacteria;g__unidentified_Alphaproteobacteria;s__unidentified_Alphaproteobacteria	0.7082524707552551
ASV_765	d__Bacteria;p__Proteobacteria;c__Alphaproteobacteria;o__Caulobacterales;f__Caulobacteraceae;g__Brevundimonas;s__unclassified_Brevundimonas	0.7237339712088163
ASV_766	d__Bacteria;p__Bacteroidetes;c__Bacteroidia;o__Bacteroidales;f__Prevotellaceae;g__Prevotella;s__unidentified_Prevotella	0.9994161834245869
ASV_767	d__Bacteria;p__Actinobacteria;c__Actinobacteria;o__Bifidobacteriales;f__Bifidobacteriaceae;g__Bifidobacterium;s__Bifidobacterium_thermacidophilum	0.9509309301503589
ASV_768	d__Bacteria;p__Bacteroidetes;c__Bacteroidia;o__Bacteroidales;f__S24-7;g__unidentified_S24-7;s__unidentified_S24-7	0.9995251066331033
ASV_769	d__Bacteria;p__Firmicutes;c__Clostridia;o__Clostridiales;f__Christensenellaceae;g__unidentified_Christensenellaceae;s__unidentified_Christensenellaceae	0.874853703900113
ASV_770	d__Bacteria;p__Proteobacteria;c__Gammaproteobacteria;o__Pseudomonadales;f__Moraxellaceae;g__Acinetobacter;s__unidentified_Acinetobacter	0.9398871799429355
ASV_771	d__Bacteria;p__Proteobacteria;c__Gammaproteobacteria;o__Enterobacteriales;f__Enterobacteriaceae;g__unclassified_Enterobacteriaceae;s__unclassified_Enterobacteriaceae	0.9977140667505816
ASV_772	d__Bacteria;p__Firmicutes;c__Bacilli;o__Lactobacillales;f__Lactobacillaceae;g__Lactobacillus;s__unidentified_Lactobacillus	0.9998075024988164
ASV_773	d__Bacteria;p__Proteobacteria;c__Betaproteobacteria;o__Burkholderiales;f__Comamonadaceae;g__Acidovorax;s__unclassified_Acidovorax	0.9022515973893834
ASV_774	d__Bacteria;p__Bacteroidetes;c__Bacteroidia;o__Bacteroidales;f__Bacteroidaceae;g__Bacteroides;s__Bacteroides_acidifaciens	0.9877349930745241
ASV_775	d__Bacteria;p__Firmicutes;c__Clostridia;o__Clostridiales;f__unclassified_Clostridiales;g__unclassified_Clostridiales;s__unclassified_Clostridiales	0.9999973408684439
ASV_776	d__Bacteria;p__Firmicutes;c__Clostridia;o__Clostridiales;f__unidentified_Clostridiales;g__unidentified_Clostridiales;s__unidentified_Clostridiales	0.883163063633803
ASV_777	d__Bacteria;p__Firmicutes;c__Clostridia;o__Clostridiales;f__unidentified_Clostridiales;g__unidentified_Clostridiales;s__unidentified_Clostridiales	0.9921289918756853
ASV_778	d__Bacteria;p__Proteobacteria;c__Alphaproteobacteria;o__Rhodospirillales;f__Rhodospirillaceae;g__unidentified_Rhodospirillaceae;s__unidentified_Rhodospirillaceae	0.9912214297879582
ASV_779	d__Bacteria;p__Firmicutes;c__Clostridia;o__Clostridiales;f__Ruminococcaceae;g__unidentified_Ruminococcaceae;s__unidentified_Ruminococcaceae	0.9370815634786209
ASV_780	d__Bacteria;p__Chloroflexi;c__TK10;o__AKYG885;f__5B-12;g__unidentified_5B-12;s__unidentified_5B-12	0.9999999910293127
ASV_781	d__Bacteria;p__Proteobacteria;c__Alphaproteobacteria;o__Rhizobiales;f__Bradyrhizobiaceae;g__unclassified_Bradyrhizobiaceae;s__unclassified_Bradyrhizobiaceae	0.9917598148820811
ASV_782	d__Bacteria;p__Proteobacteria;c__Betaproteobacteria;o__Rhodocyclales;f__Rhodocyclaceae;g__Sulfuritalea;s__unidentified_Sulfuritalea	0.8112481291753502
ASV_783	d__Bacteria;p__Proteobacteria;c__Gammaproteobacteria;o__Enterobacteriales;f__Enterobacteriaceae;g__Pseudomonas;s__Pseudomonas_syringae	0.9987255827847464
ASV_784	d__Bacteria;p__Actinobacteria;c__Actinobacteria;o__Actinomycetales;f__unclassified_Actinomycetales;g__unclassified_Actinomycetales;s__unclassified_Actinomycetales	0.9711822217860762
ASV_785	d__Bacteria;p__Firmicutes;c__Clostridia;o__Clostridiales;f__Ruminococcaceae;g__unidentified_Ruminococcaceae;s__unidentified_Ruminococcaceae	0.9773346615043711
ASV_786	d__Bacteria;p__Proteobacteria;c__Betaproteobacteria;o__Burkholderiales;f__Oxalobacteraceae;g__Massilia;s__unclassified_Massilia	0.8792641702262514
ASV_787	d__Bacteria;p__Actinobacteria;c__Actinobacteria;o__Actinomycetales;f__Microbacteriaceae;g__unclassified_Microbacteriaceae;s__unclassified_Microbacteriaceae	0.9441052936999449
ASV_788	d__Bacteria;p__Proteobacteria;c__Alphaproteobacteria;o__Rhizobiales;f__Beijerinckiaceae;g__unclassified_Beijerinckiaceae;s__unclassified_Beijerinckiaceae	0.7806528189152485
ASV_789	d__Bacteria;p__Proteobacteria;c__Betaproteobacteria;o__Burkholderiales;f__Comamonadaceae;g__unclassified_Comamonadaceae;s__unclassified_Comamonadaceae	0.983159898115784
ASV_790	d__Bacteria;p__Firmicutes;c__Clostridia;o__Clostridiales;f__unclassified_Clostridiales;g__unclassified_Clostridiales;s__unclassified_Clostridiales	0.9999999998807603
ASV_791	d__Bacteria;p__Firmicutes;c__Clostridia;o__Clostridiales;f__Ruminococcaceae;g__Oscillospira;s__unidentified_Oscillospira	0.9965743644546101
ASV_792	d__Bacteria;p__Firmicutes;c__Clostridia;o__Clostridiales;f__unclassified_Clostridiales;g__unclassified_Clostridiales;s__unclassified_Clostridiales	0.9999999983456858
ASV_793	d__Bacteria;p__Firmicutes;c__Bacilli;o__Bacillales;f__unclassified_Bacillales;g__unclassified_Bacillales;s__unclassified_Bacillales	0.7023121138805719
ASV_794	d__Bacteria;p__unidentified_Bacteria;c__unidentified_Bacteria;o__unidentified_Bacteria;f__unidentified_Bacteria;g__unidentified_Bacteria;s__unidentified_Bacteria	0.8956634202960908
ASV_795	d__Bacteria;p__Firmicutes;c__Clostridia;o__Clostridiales;f__Lachnospiraceae;g__unidentified_Lachnospiraceae;s__unidentified_Lachnospiraceae	0.9352353040722925
ASV_796	d__Bacteria;p__Actinobacteria;c__Thermoleophilia;o__Solirubrobacterales;f__Patulibacteraceae;g__unidentified_Patulibacteraceae;s__unidentified_Patulibacteraceae	0.7237920744662877
ASV_797	d__Bacteria;p__Firmicutes;c__Clostridia;o__Clostridiales;f__Ruminococcaceae;g__Ruminococcus;s__unidentified_Ruminococcus	0.999839643941385
ASV_798	d__Bacteria;p__unclassified_Bacteria;c__unclassified_Bacteria;o__unclassified_Bacteria;f__unclassified_Bacteria;g__unclassified_Bacteria;s__unclassified_Bacteria	0.9999999999999918
ASV_799	d__Bacteria;p__unclassified_Bacteria;c__unclassified_Bacteria;o__unclassified_Bacteria;f__unclassified_Bacteria;g__unclassified_Bacteria;s__unclassified_Bacteria	0.999999999999668
ASV_800	d__Bacteria;p__Proteobacteria;c__Alphaproteobacteria;o__unidentified_Alphaproteobacteria;f__unidentified_Alphaproteobacteria;g__unidentified_Alphaproteobacteria;s__unidentified_Alphaproteobacteria	0.8335557338390894
ASV_801	d__Bacteria;p__Firmicutes;c__Clostridia;o__Clostridiales;f__Ruminococcaceae;g__unidentified_Ruminococcaceae;s__unidentified_Ruminococcaceae	0.9819307968084225
ASV_802	d__Bacteria;p__Proteobacteria;c__Betaproteobacteria;o__Burkholderiales;f__Comamonadaceae;g__unclassified_Comamonadaceae;s__unclassified_Comamonadaceae	0.9500799076779365
ASV_803	d__Bacteria;p__Firmicutes;c__Clostridia;o__Clostridiales;f__unidentified_Clostridiales;g__unidentified_Clostridiales;s__unidentified_Clostridiales	0.9056349637677291
ASV_804	d__Bacteria;p__Firmicutes;c__Bacilli;o__Lactobacillales;f__Lactobacillaceae;g__Lactobacillus;s__Lactobacillus_paraplantarum	0.8801779035372306
ASV_805	d__Bacteria;p__Actinobacteria;c__Actinobacteria;o__Actinomycetales;f__Corynebacteriaceae;g__Corynebacterium;s__unidentified_Corynebacterium	0.9927950571361103
ASV_806	d__Bacteria;p__Proteobacteria;c__Gammaproteobacteria;o__Pseudomonadales;f__Pseudomonadaceae;g__Pseudomonas;s__unclassified_Pseudomonas	0.8628101020482829
ASV_807	d__Bacteria;p__Firmicutes;c__Clostridia;o__Clostridiales;f__Ruminococcaceae;g__unclassified_Ruminococcaceae;s__unclassified_Ruminococcaceae	0.9547932159411312
ASV_808	d__Bacteria;p__Proteobacteria;c__Alphaproteobacteria;o__Rhizobiales;f__unclassified_Rhizobiales;g__unclassified_Rhizobiales;s__unclassified_Rhizobiales	0.9999965277591717
ASV_809	d__Bacteria;p__Firmicutes;c__Clostridia;o__Clostridiales;f__unclassified_Clostridiales;g__unclassified_Clostridiales;s__unclassified_Clostridiales	0.9998796739335869
ASV_810	d__Bacteria;p__Proteobacteria;c__Alphaproteobacteria;o__Rhizobiales;f__Beijerinckiaceae;g__Beijerinckia;s__unidentified_Beijerinckia	0.9052970248010739
ASV_811	d__Bacteria;p__Firmicutes;c__Clostridia;o__Clostridiales;f__Ruminococcaceae;g__Oscillospira;s__unidentified_Oscillospira	0.9998777109647875
ASV_812	d__Bacteria;p__Bacteroidetes;c__Bacteroidia;o__Bacteroidales;f__Prevotellaceae;g__Prevotella;s__Prevotella_copri	0.9999442750000644
ASV_813	d__Bacteria;p__Proteobacteria;c__Gammaproteobacteria;o__Enterobacteriales;f__Enterobacteriaceae;g__unclassified_Enterobacteriaceae;s__unclassified_Enterobacteriaceae	0.9596810376023507
ASV_814	d__Bacteria;p__Firmicutes;c__Clostridia;o__Clostridiales;f__Lachnospiraceae;g__unclassified_Lachnospiraceae;s__unclassified_Lachnospiraceae	0.8010747809255847
ASV_815	d__Bacteria;p__Firmicutes;c__Clostridia;o__Clostridiales;f__Christensenellaceae;g__unidentified_Christensenellaceae;s__unidentified_Christensenellaceae	0.8302010357027662
ASV_816	d__Bacteria;p__Firmicutes;c__Clostridia;o__Clostridiales;f__Ruminococcaceae;g__Ruminococcus;s__unidentified_Ruminococcus	0.8956055456574289
ASV_817	d__Bacteria;p__Firmicutes;c__Clostridia;o__Clostridiales;f__Ruminococcaceae;g__Ruminococcus;s__unidentified_Ruminococcus	0.7241015758052494
ASV_818	d__Bacteria;p__Proteobacteria;c__Gammaproteobacteria;o__Aeromonadales;f__Aeromonadaceae;g__Aeromonas;s__unclassified_Aeromonas	0.991004414210668
ASV_819	d__Bacteria;p__Cyanobacteria;c__4C0d-2;o__YS2;f__unidentified_YS2;g__unidentified_YS2;s__unidentified_YS2	0.9999999843223578
ASV_820	d__Bacteria;p__Bacteroidetes;c__Bacteroidia;o__Bacteroidales;f__unclassified_Bacteroidales;g__unclassified_Bacteroidales;s__unclassified_Bacteroidales	0.7078755034814338
ASV_821	d__Bacteria;p__Bacteroidetes;c__Bacteroidia;o__Bacteroidales;f__Prevotellaceae;g__unidentified_Prevotellaceae;s__unidentified_Prevotellaceae	0.9431073375613372
ASV_822	d__Bacteria;p__unclassified_Bacteria;c__unclassified_Bacteria;o__unclassified_Bacteria;f__unclassified_Bacteria;g__unclassified_Bacteria;s__unclassified_Bacteria	0.9999999999997844
ASV_823	d__Bacteria;p__Firmicutes;c__Clostridia;o__Clostridiales;f__Ruminococcaceae;g__unidentified_Ruminococcaceae;s__unidentified_Ruminococcaceae	0.8424131307267738
ASV_824	d__Bacteria;p__Proteobacteria;c__Betaproteobacteria;o__Burkholderiales;f__Burkholderiaceae;g__Burkholderia;s__unidentified_Burkholderia	0.9453024052277456
ASV_825	d__Bacteria;p__Firmicutes;c__Bacilli;o__Lactobacillales;f__Lactobacillaceae;g__Lactobacillus;s__unidentified_Lactobacillus	0.9886606943207851
ASV_826	d__Bacteria;p__Proteobacteria;c__Alphaproteobacteria;o__Rhodospirillales;f__Rhodospirillaceae;g__unidentified_Rhodospirillaceae;s__unidentified_Rhodospirillaceae	0.9801934933695643
ASV_827	d__Bacteria;p__Proteobacteria;c__Alphaproteobacteria;o__Ellin329;f__unidentified_Ellin329;g__unidentified_Ellin329;s__unidentified_Ellin329	0.9999998015680288
ASV_828	d__Bacteria;p__Bacteroidetes;c__Bacteroidia;o__Bacteroidales;f__Bacteroidaceae;g__Bacteroides;s__Bacteroides_plebeius	0.8439783948869476
ASV_829	d__Bacteria;p__Firmicutes;c__Clostridia;o__Clostridiales;f__Ruminococcaceae;g__unidentified_Ruminococcaceae;s__unidentified_Ruminococcaceae	0.999226850000092
ASV_830	d__Bacteria;p__Firmicutes;c__Clostridia;o__Clostridiales;f__Ruminococcaceae;g__unidentified_Ruminococcaceae;s__unidentified_Ruminococcaceae	0.7472624160507025
ASV_831	d__Bacteria;p__Firmicutes;c__Clostridia;o__Clostridiales;f__unidentified_Clostridiales;g__unidentified_Clostridiales;s__unidentified_Clostridiales	0.7814809520328622
ASV_832	d__Bacteria;p__unidentified_Bacteria;c__unidentified_Bacteria;o__unidentified_Bacteria;f__unidentified_Bacteria;g__unidentified_Bacteria;s__unidentified_Bacteria	0.9163384850063868
ASV_833	d__Bacteria;p__Proteobacteria;c__Gammaproteobacteria;o__unclassified_Gammaproteobacteria;f__unclassified_Gammaproteobacteria;g__unclassified_Gammaproteobacteria;s__unclassified_Gammaproteobacteria	0.9999984614811445
ASV_834	d__Bacteria;p__Firmicutes;c__Clostridia;o__Clostridiales;f__Lachnospiraceae;g__unidentified_Lachnospiraceae;s__unidentified_Lachnospiraceae	0.8564967296716679
ASV_835	d__Bacteria;p__Acidobacteria;c__Acidobacteria-6;o__CCU21;f__unidentified_CCU21;g__unidentified_CCU21;s__unidentified_CCU21	0.9999959461312673
ASV_836	d__Bacteria;p__Proteobacteria;c__Gammaproteobacteria;o__Xanthomonadales;f__Xanthomonadaceae;g__unidentified_Xanthomonadaceae;s__unidentified_Xanthomonadaceae	0.8056600201617434
ASV_837	d__Bacteria;p__Chloroflexi;c__Ellin6529;o__unidentified_Ellin6529;f__unidentified_Ellin6529;g__unidentified_Ellin6529;s__unidentified_Ellin6529	0.9999875746256088
ASV_838	d__Bacteria;p__Tenericutes;c__Mollicutes;o__RF39;f__unidentified_RF39;g__unidentified_RF39;s__unidentified_RF39	0.717987962463213
ASV_839	d__Bacteria;p__Actinobacteria;c__Actinobacteria;o__Actinomycetales;f__Micromonosporaceae;g__unclassified_Micromonosporaceae;s__unclassified_Micromonosporaceae	0.9999196588915501
ASV_840	d__Bacteria;p__Proteobacteria;c__Gammaproteobacteria;o__Xanthomonadales;f__Xanthomonadaceae;g__unidentified_Xanthomonadaceae;s__unidentified_Xanthomonadaceae	0.9967065002636138
ASV_841	d__Bacteria;p__Bacteroidetes;c__Bacteroidia;o__Bacteroidales;f__S24-7;g__unidentified_S24-7;s__unidentified_S24-7	0.9684212633341532
ASV_842	d__Bacteria;p__Firmicutes;c__Clostridia;o__Clostridiales;f__Peptostreptococcaceae;g__Clostridium;s__Clostridium_ruminantium	0.8361103855992098
ASV_843	d__Bacteria;p__Actinobacteria;c__Actinobacteria;o__Actinomycetales;f__unidentified_Actinomycetales;g__unidentified_Actinomycetales;s__unidentified_Actinomycetales	0.9291645673972793
ASV_844	d__Bacteria;p__Actinobacteria;c__Thermoleophilia;o__Solirubrobacterales;f__Solirubrobacteraceae;g__unclassified_Solirubrobacteraceae;s__unclassified_Solirubrobacteraceae	0.8602371612789596
ASV_845	d__Bacteria;p__Bacteroidetes;c__Bacteroidia;o__Bacteroidales;f__Prevotellaceae;g__Prevotella;s__unidentified_Prevotella	0.9927914563418299
ASV_846	d__Bacteria;p__Firmicutes;c__Clostridia;o__Clostridiales;f__Lachnospiraceae;g__unclassified_Lachnospiraceae;s__unclassified_Lachnospiraceae	0.9871880393037458
ASV_847	d__Bacteria;p__Firmicutes;c__Clostridia;o__Clostridiales;f__unclassified_Clostridiales;g__unclassified_Clostridiales;s__unclassified_Clostridiales	0.9999999406099699
ASV_848	d__Bacteria;p__Firmicutes;c__Bacilli;o__Lactobacillales;f__Leuconostocaceae;g__Weissella;s__unclassified_Weissella	0.9107545275146967
ASV_849	d__Bacteria;p__Proteobacteria;c__unclassified_Proteobacteria;o__unclassified_Proteobacteria;f__unclassified_Proteobacteria;g__unclassified_Proteobacteria;s__unclassified_Proteobacteria	0.7801270258420483
ASV_850	d__Bacteria;p__unclassified_Bacteria;c__unclassified_Bacteria;o__unclassified_Bacteria;f__unclassified_Bacteria;g__unclassified_Bacteria;s__unclassified_Bacteria	0.9999999945581486
ASV_851	d__Bacteria;p__Firmicutes;c__Clostridia;o__Clostridiales;f__unidentified_Clostridiales;g__unidentified_Clostridiales;s__unidentified_Clostridiales	0.9984694998682799
ASV_852	d__Bacteria;p__Firmicutes;c__Clostridia;o__Clostridiales;f__Lachnospiraceae;g__unidentified_Lachnospiraceae;s__unidentified_Lachnospiraceae	0.9059931030074425
ASV_853	d__Bacteria;p__Proteobacteria;c__Betaproteobacteria;o__Rhodocyclales;f__Rhodocyclaceae;g__Zoogloea;s__unidentified_Zoogloea	0.9992062546008771
ASV_854	d__Bacteria;p__Firmicutes;c__Bacilli;o__Lactobacillales;f__Lactobacillaceae;g__Lactobacillus;s__Lactobacillus_hamsteri	0.8971021813876702
ASV_855	d__Bacteria;p__unclassified_Bacteria;c__unclassified_Bacteria;o__unclassified_Bacteria;f__unclassified_Bacteria;g__unclassified_Bacteria;s__unclassified_Bacteria	0.9999999993720851
ASV_856	d__Bacteria;p__Firmicutes;c__Clostridia;o__Clostridiales;f__Peptostreptococcaceae;g__unclassified_Peptostreptococcaceae;s__unclassified_Peptostreptococcaceae	0.9670307989834256
ASV_857	d__Bacteria;p__Actinobacteria;c__Actinobacteria;o__Actinomycetales;f__Streptosporangiaceae;g__unclassified_Streptosporangiaceae;s__unclassified_Streptosporangiaceae	0.9930813532042996
ASV_858	d__Bacteria;p__Firmicutes;c__Clostridia;o__Clostridiales;f__unclassified_Clostridiales;g__unclassified_Clostridiales;s__unclassified_Clostridiales	0.9999824343567072
ASV_859	d__Bacteria;p__Proteobacteria;c__Gammaproteobacteria;o__Enterobacteriales;f__Enterobacteriaceae;g__unclassified_Enterobacteriaceae;s__unclassified_Enterobacteriaceae	0.9975968298548322
ASV_860	d__Bacteria;p__Actinobacteria;c__Actinobacteria;o__Actinomycetales;f__Propionibacteriaceae;g__Microlunatus;s__unidentified_Microlunatus	0.9659087824777225
ASV_861	d__Bacteria;p__Bacteroidetes;c__Bacteroidia;o__Bacteroidales;f__unidentified_Bacteroidales;g__unidentified_Bacteroidales;s__unidentified_Bacteroidales	0.9990708802215976
ASV_862	d__Bacteria;p__Bacteroidetes;c__Bacteroidia;o__Bacteroidales;f__Prevotellaceae;g__unclassified_Prevotellaceae;s__unclassified_Prevotellaceae	0.7040298618978305
ASV_863	d__Bacteria;p__unclassified_Bacteria;c__unclassified_Bacteria;o__unclassified_Bacteria;f__unclassified_Bacteria;g__unclassified_Bacteria;s__unclassified_Bacteria	0.9999999999990447
ASV_864	d__Bacteria;p__Bacteroidetes;c__Bacteroidia;o__Bacteroidales;f__Prevotellaceae;g__Prevotella;s__Prevotella_copri	0.9746164014229916
ASV_865	d__Bacteria;p__Tenericutes;c__Mollicutes;o__RF39;f__unidentified_RF39;g__unidentified_RF39;s__unidentified_RF39	0.9999999883744978
ASV_866	d__Bacteria;p__Firmicutes;c__Clostridia;o__Clostridiales;f__unidentified_Clostridiales;g__unidentified_Clostridiales;s__unidentified_Clostridiales	0.7865276592057002
ASV_867	d__Bacteria;p__Actinobacteria;c__Actinobacteria;o__Micrococcales;f__unidentified_Micrococcales;g__unidentified_Micrococcales;s__unidentified_Micrococcales	0.9999998885016685
ASV_868	d__Bacteria;p__unclassified_Bacteria;c__unclassified_Bacteria;o__unclassified_Bacteria;f__unclassified_Bacteria;g__unclassified_Bacteria;s__unclassified_Bacteria	0.9999999999190897
ASV_869	d__Bacteria;p__Proteobacteria;c__Alphaproteobacteria;o__unclassified_Alphaproteobacteria;f__unclassified_Alphaproteobacteria;g__unclassified_Alphaproteobacteria;s__unclassified_Alphaproteobacteria	0.9998722648675697
ASV_870	d__Bacteria;p__Acidobacteria;c__Acidobacteriia;o__Acidobacteriales;f__Koribacteraceae;g__Candidatus_Koribacter;s__unidentified_Candidatus_Koribacter	0.9987841243118287
ASV_871	d__Bacteria;p__Proteobacteria;c__unclassified_Proteobacteria;o__unclassified_Proteobacteria;f__unclassified_Proteobacteria;g__unclassified_Proteobacteria;s__unclassified_Proteobacteria	0.999998981977196
ASV_872	d__Bacteria;p__Firmicutes;c__Clostridia;o__Clostridiales;f__Ruminococcaceae;g__unidentified_Ruminococcaceae;s__unidentified_Ruminococcaceae	0.9857947612742264
ASV_873	d__Bacteria;p__Firmicutes;c__Clostridia;o__Clostridiales;f__unidentified_Clostridiales;g__unidentified_Clostridiales;s__unidentified_Clostridiales	0.998113187181737
ASV_874	d__Bacteria;p__Proteobacteria;c__Gammaproteobacteria;o__Enterobacteriales;f__Enterobacteriaceae;g__Pseudomonas;s__Pseudomonas_syringae	0.9255742708428326
ASV_875	d__Bacteria;p__Proteobacteria;c__Alphaproteobacteria;o__Rhizobiales;f__Rhizobiaceae;g__unclassified_Rhizobiaceae;s__unclassified_Rhizobiaceae	0.8626637711313692
ASV_876	d__Bacteria;p__Proteobacteria;c__Gammaproteobacteria;o__Enterobacteriales;f__Enterobacteriaceae;g__unclassified_Enterobacteriaceae;s__unclassified_Enterobacteriaceae	0.999988189199949
ASV_877	d__Bacteria;p__Firmicutes;c__Clostridia;o__Clostridiales;f__Lachnospiraceae;g__unidentified_Lachnospiraceae;s__unidentified_Lachnospiraceae	0.8698459022764007
ASV_878	d__Bacteria;p__Firmicutes;c__Clostridia;o__Clostridiales;f__[Mogibacteriaceae];g__unidentified_[Mogibacteriaceae];s__unidentified_[Mogibacteriaceae]	0.9775252679619423
ASV_879	d__Bacteria;p__Proteobacteria;c__Alphaproteobacteria;o__Rhizobiales;f__Bradyrhizobiaceae;g__unclassified_Bradyrhizobiaceae;s__unclassified_Bradyrhizobiaceae	0.9596554473419755
ASV_880	d__Bacteria;p__Actinobacteria;c__Actinobacteria;o__Actinomycetales;f__Micromonosporaceae;g__unclassified_Micromonosporaceae;s__unclassified_Micromonosporaceae	0.9996459250093879
ASV_881	d__Bacteria;p__Proteobacteria;c__Gammaproteobacteria;o__Pseudomonadales;f__Moraxellaceae;g__Psychrobacter;s__unidentified_Psychrobacter	0.9923010846217256
ASV_882	d__Bacteria;p__Proteobacteria;c__Alphaproteobacteria;o__Caulobacterales;f__Caulobacteraceae;g__Caulobacter;s__Caulobacter_vibrioides	0.9910042985139417
ASV_883	d__Bacteria;p__Proteobacteria;c__Gammaproteobacteria;o__unclassified_Gammaproteobacteria;f__unclassified_Gammaproteobacteria;g__unclassified_Gammaproteobacteria;s__unclassified_Gammaproteobacteria	0.9888443325687499
ASV_884	d__Bacteria;p__Firmicutes;c__Clostridia;o__Clostridiales;f__Lachnospiraceae;g__unidentified_Lachnospiraceae;s__unidentified_Lachnospiraceae	0.8936688828174107
ASV_885	d__Bacteria;p__unidentified_Bacteria;c__unidentified_Bacteria;o__unidentified_Bacteria;f__unidentified_Bacteria;g__unidentified_Bacteria;s__unidentified_Bacteria	0.9661327542788646
ASV_886	d__Bacteria;p__Firmicutes;c__Clostridia;o__Clostridiales;f__Christensenellaceae;g__unidentified_Christensenellaceae;s__unidentified_Christensenellaceae	0.9999953477895858
ASV_887	d__Bacteria;p__Acidobacteria;c__Acidobacteriia;o__Acidobacteriales;f__unidentified_Acidobacteriales;g__unidentified_Acidobacteriales;s__unidentified_Acidobacteriales	0.9999997015848568
ASV_888	d__Bacteria;p__Tenericutes;c__RF3;o__ML615J-28;f__unidentified_ML615J-28;g__unidentified_ML615J-28;s__unidentified_ML615J-28	0.9991798249083296
ASV_889	d__Bacteria;p__Firmicutes;c__Clostridia;o__Clostridiales;f__unclassified_Clostridiales;g__unclassified_Clostridiales;s__unclassified_Clostridiales	0.9999728665497895
ASV_890	d__Bacteria;p__Firmicutes;c__Clostridia;o__Clostridiales;f__Ruminococcaceae;g__Oscillospira;s__unidentified_Oscillospira	0.8273224777847835
ASV_891	d__Bacteria;p__Bacteroidetes;c__Bacteroidia;o__Bacteroidales;f__[Paraprevotellaceae];g__YRC22;s__unidentified_YRC22	0.9999999035172824
ASV_892	d__Bacteria;p__Actinobacteria;c__Actinobacteria;o__Micrococcales;f__unidentified_Micrococcales;g__unidentified_Micrococcales;s__unidentified_Micrococcales	0.9999999984285353
ASV_893	d__Bacteria;p__Firmicutes;c__Clostridia;o__Clostridiales;f__unclassified_Clostridiales;g__unclassified_Clostridiales;s__unclassified_Clostridiales	0.9997534668753301
ASV_894	d__Bacteria;p__Firmicutes;c__Clostridia;o__Clostridiales;f__Lachnospiraceae;g__unidentified_Lachnospiraceae;s__unidentified_Lachnospiraceae	0.783520885751722
ASV_895	d__Bacteria;p__Firmicutes;c__Clostridia;o__Clostridiales;f__unidentified_Clostridiales;g__unidentified_Clostridiales;s__unidentified_Clostridiales	0.9998044128670072
ASV_896	d__Bacteria;p__Firmicutes;c__Clostridia;o__Clostridiales;f__Ruminococcaceae;g__unidentified_Ruminococcaceae;s__unidentified_Ruminococcaceae	0.9066626420254243
ASV_897	d__Bacteria;p__Firmicutes;c__Bacilli;o__Bacillales;f__unclassified_Bacillales;g__unclassified_Bacillales;s__unclassified_Bacillales	0.9908655114347161
ASV_898	d__Bacteria;p__Firmicutes;c__Clostridia;o__Clostridiales;f__Ruminococcaceae;g__Oscillospira;s__unidentified_Oscillospira	0.9999242963101768
ASV_899	d__Bacteria;p__Bacteroidetes;c__Bacteroidia;o__Bacteroidales;f__Prevotellaceae;g__Prevotella;s__unidentified_Prevotella	0.9998659946431807
ASV_900	d__Bacteria;p__Tenericutes;c__Mollicutes;o__RF39;f__unidentified_RF39;g__unidentified_RF39;s__unidentified_RF39	0.9999999837954762
ASV_901	d__Bacteria;p__Firmicutes;c__Clostridia;o__Clostridiales;f__Ruminococcaceae;g__unidentified_Ruminococcaceae;s__unidentified_Ruminococcaceae	0.7866025736275588
ASV_902	d__Bacteria;p__Firmicutes;c__Clostridia;o__Clostridiales;f__Lachnospiraceae;g__unclassified_Lachnospiraceae;s__unclassified_Lachnospiraceae	0.8624591553289143
ASV_903	d__Bacteria;p__Proteobacteria;c__Alphaproteobacteria;o__Rhodospirillales;f__Rhodospirillaceae;g__unidentified_Rhodospirillaceae;s__unidentified_Rhodospirillaceae	0.9969100580153957
ASV_904	d__Bacteria;p__Firmicutes;c__Bacilli;o__Lactobacillales;f__unclassified_Lactobacillales;g__unclassified_Lactobacillales;s__unclassified_Lactobacillales	0.7795765388210468
ASV_905	d__Bacteria;p__Bacteroidetes;c__Bacteroidia;o__Bacteroidales;f__S24-7;g__unidentified_S24-7;s__unidentified_S24-7	0.8761314679951917
ASV_906	d__Bacteria;p__Firmicutes;c__Bacilli;o__Bacillales;f__Planococcaceae;g__Sporosarcina;s__unidentified_Sporosarcina	0.7517904473597558
ASV_907	d__Bacteria;p__Bacteroidetes;c__Bacteroidia;o__Bacteroidales;f__unidentified_Bacteroidales;g__unidentified_Bacteroidales;s__unidentified_Bacteroidales	0.7073792328210728
ASV_908	d__Bacteria;p__Firmicutes;c__Clostridia;o__Clostridiales;f__Lachnospiraceae;g__unidentified_Lachnospiraceae;s__unidentified_Lachnospiraceae	0.9032640638767777
ASV_909	d__Bacteria;p__unclassified_Bacteria;c__unclassified_Bacteria;o__unclassified_Bacteria;f__unclassified_Bacteria;g__unclassified_Bacteria;s__unclassified_Bacteria	0.9999999999996341
ASV_910	d__Bacteria;p__Firmicutes;c__Clostridia;o__Clostridiales;f__Ruminococcaceae;g__unidentified_Ruminococcaceae;s__unidentified_Ruminococcaceae	0.9992361083381657
ASV_911	d__Bacteria;p__Proteobacteria;c__Deltaproteobacteria;o__Myxococcales;f__Haliangiaceae;g__unidentified_Haliangiaceae;s__unidentified_Haliangiaceae	0.9999960865640226
ASV_912	d__Bacteria;p__Firmicutes;c__Bacilli;o__Lactobacillales;f__Lactobacillaceae;g__Lactobacillus;s__Lactobacillus_salivarius	0.7935175589912463
ASV_913	d__Bacteria;p__Firmicutes;c__Clostridia;o__Clostridiales;f__Lachnospiraceae;g__unidentified_Lachnospiraceae;s__unidentified_Lachnospiraceae	0.892442618654218
ASV_914	d__Bacteria;p__Firmicutes;c__Clostridia;o__Clostridiales;f__unclassified_Clostridiales;g__unclassified_Clostridiales;s__unclassified_Clostridiales	0.9999995179386896
ASV_915	d__Bacteria;p__Bacteroidetes;c__Bacteroidia;o__Bacteroidales;f__S24-7;g__unidentified_S24-7;s__unidentified_S24-7	0.8671719488006931
ASV_916	d__Bacteria;p__Bacteroidetes;c__Bacteroidia;o__Bacteroidales;f__S24-7;g__unidentified_S24-7;s__unidentified_S24-7	0.9994728665796516
ASV_917	d__Bacteria;p__Bacteroidetes;c__Bacteroidia;o__Bacteroidales;f__S24-7;g__unidentified_S24-7;s__unidentified_S24-7	0.9999702958237879
ASV_918	d__Bacteria;p__unclassified_Bacteria;c__unclassified_Bacteria;o__unclassified_Bacteria;f__unclassified_Bacteria;g__unclassified_Bacteria;s__unclassified_Bacteria	0.9999999999981976
ASV_919	d__Bacteria;p__Proteobacteria;c__Gammaproteobacteria;o__Pseudomonadales;f__Moraxellaceae;g__unidentified_Moraxellaceae;s__unidentified_Moraxellaceae	0.9050467502002282
ASV_920	d__Bacteria;p__Firmicutes;c__Clostridia;o__Clostridiales;f__Peptostreptococcaceae;g__Clostridium;s__Clostridium_ruminantium	0.799460430581688
ASV_921	d__Bacteria;p__Firmicutes;c__Clostridia;o__Clostridiales;f__unidentified_Clostridiales;g__unidentified_Clostridiales;s__unidentified_Clostridiales	0.9959880729278978
ASV_922	d__Bacteria;p__Proteobacteria;c__Deltaproteobacteria;o__Myxococcales;f__Cystobacterineae;g__unidentified_Cystobacterineae;s__unidentified_Cystobacterineae	0.9998103649890393
ASV_923	d__Bacteria;p__Firmicutes;c__Clostridia;o__Clostridiales;f__Lachnospiraceae;g__unclassified_Lachnospiraceae;s__unclassified_Lachnospiraceae	0.7482660744453615
ASV_924	d__Bacteria;p__Proteobacteria;c__Betaproteobacteria;o__Nitrosomonadales;f__Nitrosomonadaceae;g__Nitrosospira;s__Nitrosospira_multiformis	0.7545070690886169
ASV_925	d__Bacteria;p__Firmicutes;c__Bacilli;o__Bacillales;f__unclassified_Bacillales;g__unclassified_Bacillales;s__unclassified_Bacillales	0.9920202434159388
ASV_926	d__Bacteria;p__Actinobacteria;c__Actinobacteria;o__Bifidobacteriales;f__Bifidobacteriaceae;g__Bifidobacterium;s__unclassified_Bifidobacterium	0.9536919879661278
ASV_927	d__Bacteria;p__Firmicutes;c__Clostridia;o__Clostridiales;f__Lachnospiraceae;g__unidentified_Lachnospiraceae;s__unidentified_Lachnospiraceae	0.8654081394816205
ASV_928	d__Bacteria;p__Firmicutes;c__Clostridia;o__Clostridiales;f__Lachnospiraceae;g__unclassified_Lachnospiraceae;s__unclassified_Lachnospiraceae	0.8262329641436184
ASV_929	d__Bacteria;p__Bacteroidetes;c__Bacteroidia;o__Bacteroidales;f__S24-7;g__unidentified_S24-7;s__unidentified_S24-7	0.9999985107924094
ASV_930	d__Bacteria;p__Firmicutes;c__Clostridia;o__Clostridiales;f__Clostridiaceae;g__Clostridium;s__unidentified_Clostridium	0.8926773885209938
ASV_931	d__Bacteria;p__Bacteroidetes;c__Bacteroidia;o__Bacteroidales;f__Prevotellaceae;g__Prevotella;s__unidentified_Prevotella	0.9997413712512941
ASV_932	d__Bacteria;p__Firmicutes;c__Clostridia;o__Clostridiales;f__unclassified_Clostridiales;g__unclassified_Clostridiales;s__unclassified_Clostridiales	0.9999813835212334
ASV_933	d__Bacteria;p__Firmicutes;c__Clostridia;o__Clostridiales;f__unidentified_Clostridiales;g__unidentified_Clostridiales;s__unidentified_Clostridiales	0.9167411762862849
ASV_934	d__Bacteria;p__unclassified_Bacteria;c__unclassified_Bacteria;o__unclassified_Bacteria;f__unclassified_Bacteria;g__unclassified_Bacteria;s__unclassified_Bacteria	0.9999999996610743
ASV_935	d__Bacteria;p__Firmicutes;c__Clostridia;o__Clostridiales;f__Ruminococcaceae;g__unidentified_Ruminococcaceae;s__unidentified_Ruminococcaceae	0.8975946866526279
ASV_936	d__Bacteria;p__Firmicutes;c__Clostridia;o__Clostridiales;f__Lachnospiraceae;g__unidentified_Lachnospiraceae;s__unidentified_Lachnospiraceae	0.7912067268163032
ASV_937	d__Bacteria;p__Bacteroidetes;c__Bacteroidia;o__Bacteroidales;f__S24-7;g__unidentified_S24-7;s__unidentified_S24-7	0.9999968019876042
ASV_938	d__Bacteria;p__Bacteroidetes;c__Bacteroidia;o__Bacteroidales;f__S24-7;g__unidentified_S24-7;s__unidentified_S24-7	0.9999963208090928
ASV_939	d__Bacteria;p__Firmicutes;c__Bacilli;o__Lactobacillales;f__Lactobacillaceae;g__Pediococcus;s__unclassified_Pediococcus	0.9982550908274482
ASV_940	d__Bacteria;p__Bacteroidetes;c__Bacteroidia;o__Bacteroidales;f__S24-7;g__unidentified_S24-7;s__unidentified_S24-7	0.9999991971572325
ASV_941	d__Bacteria;p__Bacteroidetes;c__Bacteroidia;o__Bacteroidales;f__S24-7;g__unidentified_S24-7;s__unidentified_S24-7	0.9999961900319752
ASV_942	d__Bacteria;p__Firmicutes;c__Clostridia;o__Clostridiales;f__Ruminococcaceae;g__unidentified_Ruminococcaceae;s__unidentified_Ruminococcaceae	0.8989559023932843
ASV_943	d__Bacteria;p__Firmicutes;c__Clostridia;o__Clostridiales;f__Ruminococcaceae;g__unidentified_Ruminococcaceae;s__unidentified_Ruminococcaceae	0.7049552377837305
ASV_944	d__Bacteria;p__Gemmatimonadetes;c__Gemmatimonadetes;o__Ellin5290;f__unidentified_Ellin5290;g__unidentified_Ellin5290;s__unidentified_Ellin5290	0.9961413689280664
ASV_945	d__Bacteria;p__Proteobacteria;c__Gammaproteobacteria;o__Enterobacteriales;f__Enterobacteriaceae;g__Xenorhabdus;s__unclassified_Xenorhabdus	0.8148413703418731
ASV_946	d__Bacteria;p__Firmicutes;c__Clostridia;o__Clostridiales;f__unidentified_Clostridiales;g__unidentified_Clostridiales;s__unidentified_Clostridiales	0.8704978190268146
ASV_947	d__Bacteria;p__Tenericutes;c__Mollicutes;o__RF39;f__unidentified_RF39;g__unidentified_RF39;s__unidentified_RF39	0.9999999996165059
ASV_948	d__Bacteria;p__Firmicutes;c__Clostridia;o__Clostridiales;f__Lachnospiraceae;g__unidentified_Lachnospiraceae;s__unidentified_Lachnospiraceae	0.9123994810110508
ASV_949	d__Bacteria;p__Bacteroidetes;c__Bacteroidia;o__Bacteroidales;f__S24-7;g__unidentified_S24-7;s__unidentified_S24-7	0.9999995040533158
ASV_950	d__Bacteria;p__Firmicutes;c__Clostridia;o__Clostridiales;f__unclassified_Clostridiales;g__unclassified_Clostridiales;s__unclassified_Clostridiales	0.9999999994747761
ASV_951	d__Bacteria;p__Actinobacteria;c__Actinobacteria;o__Actinomycetales;f__Microbacteriaceae;g__Cryocola;s__unidentified_Cryocola	0.9550686773383767
ASV_952	d__Bacteria;p__Cyanobacteria;c__Chloroplast;o__Streptophyta;f__unidentified_Streptophyta;g__unidentified_Streptophyta;s__unidentified_Streptophyta	0.9999999803369806
ASV_953	d__Bacteria;p__Firmicutes;c__Bacilli;o__Bacillales;f__unclassified_Bacillales;g__unclassified_Bacillales;s__unclassified_Bacillales	0.9998606104850924
ASV_954	d__Bacteria;p__Firmicutes;c__Clostridia;o__Clostridiales;f__unclassified_Clostridiales;g__unclassified_Clostridiales;s__unclassified_Clostridiales	0.99976335683613
ASV_955	d__Bacteria;p__Proteobacteria;c__Betaproteobacteria;o__Neisseriales;f__Neisseriaceae;g__unclassified_Neisseriaceae;s__unclassified_Neisseriaceae	0.9999480646285943
ASV_956	d__Bacteria;p__Firmicutes;c__Clostridia;o__Clostridiales;f__unidentified_Clostridiales;g__unidentified_Clostridiales;s__unidentified_Clostridiales	0.9963627878761138
ASV_957	d__Bacteria;p__Firmicutes;c__Bacilli;o__Lactobacillales;f__Aerococcaceae;g__Granulicatella;s__Granulicatella_balaenopterae	0.8727669719659177
ASV_958	d__Bacteria;p__Firmicutes;c__Clostridia;o__Clostridiales;f__Ruminococcaceae;g__unidentified_Ruminococcaceae;s__unidentified_Ruminococcaceae	0.8053578513793297
ASV_959	d__Bacteria;p__Bacteroidetes;c__Bacteroidia;o__Bacteroidales;f__S24-7;g__unidentified_S24-7;s__unidentified_S24-7	0.9999802539532651
ASV_960	d__Bacteria;p__Firmicutes;c__Clostridia;o__Clostridiales;f__Lachnospiraceae;g__unidentified_Lachnospiraceae;s__unidentified_Lachnospiraceae	0.7867662136336688
ASV_961	d__Bacteria;p__Bacteroidetes;c__Bacteroidia;o__Bacteroidales;f__S24-7;g__unidentified_S24-7;s__unidentified_S24-7	0.9999937472464866
ASV_962	d__Bacteria;p__Firmicutes;c__Bacilli;o__Lactobacillales;f__unclassified_Lactobacillales;g__unclassified_Lactobacillales;s__unclassified_Lactobacillales	0.793629905427434
ASV_963	d__Bacteria;p__Firmicutes;c__Clostridia;o__Clostridiales;f__unidentified_Clostridiales;g__unidentified_Clostridiales;s__unidentified_Clostridiales	0.9855870478497581
ASV_964	d__Bacteria;p__Gemmatimonadetes;c__Gemmatimonadetes;o__unidentified_Gemmatimonadetes;f__unidentified_Gemmatimonadetes;g__unidentified_Gemmatimonadetes;s__unidentified_Gemmatimonadetes	0.9932819646327581
ASV_965	d__Bacteria;p__Actinobacteria;c__Thermoleophilia;o__Gaiellales;f__Gaiellaceae;g__unidentified_Gaiellaceae;s__unidentified_Gaiellaceae	0.999864867756258
ASV_966	d__Bacteria;p__Firmicutes;c__Clostridia;o__Clostridiales;f__[Mogibacteriaceae];g__unidentified_[Mogibacteriaceae];s__unidentified_[Mogibacteriaceae]	0.9424748146913625
ASV_967	d__Bacteria;p__Firmicutes;c__Clostridia;o__Clostridiales;f__unclassified_Clostridiales;g__unclassified_Clostridiales;s__unclassified_Clostridiales	0.9999999992833684
ASV_968	d__Bacteria;p__Actinobacteria;c__Actinobacteria;o__Actinomycetales;f__Microbacteriaceae;g__unclassified_Microbacteriaceae;s__unclassified_Microbacteriaceae	0.9233238239016943
ASV_969	d__Bacteria;p__Gemmatimonadetes;c__Gemm-1;o__unidentified_Gemm-1;f__unidentified_Gemm-1;g__unidentified_Gemm-1;s__unidentified_Gemm-1	0.9999999997504005
ASV_970	d__Bacteria;p__Firmicutes;c__Bacilli;o__Bacillales;f__Bacillaceae;g__Bacillus;s__Bacillus_coahuilensis	0.8862457171735697
ASV_971	d__Bacteria;p__Gemmatimonadetes;c__Gemmatimonadetes;o__C114;f__unidentified_C114;g__unidentified_C114;s__unidentified_C114	0.9999999927650265
ASV_972	d__Bacteria;p__Firmicutes;c__Clostridia;o__Clostridiales;f__unidentified_Clostridiales;g__unidentified_Clostridiales;s__unidentified_Clostridiales	0.9861986041263617
ASV_973	d__Bacteria;p__Firmicutes;c__Bacilli;o__Bacillales;f__Bacillaceae;g__Bacillus;s__Bacillus_flexus	0.9501039133938345
ASV_974	d__Bacteria;p__Proteobacteria;c__Gammaproteobacteria;o__Pseudomonadales;f__Moraxellaceae;g__unidentified_Moraxellaceae;s__unidentified_Moraxellaceae	0.9974777092459902
ASV_975	d__Bacteria;p__Proteobacteria;c__Alphaproteobacteria;o__Rhodospirillales;f__Rhodospirillaceae;g__unidentified_Rhodospirillaceae;s__unidentified_Rhodospirillaceae	0.9974060925254984
ASV_976	d__Bacteria;p__Firmicutes;c__Clostridia;o__Clostridiales;f__unidentified_Clostridiales;g__unidentified_Clostridiales;s__unidentified_Clostridiales	0.903981508432148
ASV_977	d__Bacteria;p__Proteobacteria;c__Alphaproteobacteria;o__unclassified_Alphaproteobacteria;f__unclassified_Alphaproteobacteria;g__unclassified_Alphaproteobacteria;s__unclassified_Alphaproteobacteria	0.999640673277511
ASV_978	d__Bacteria;p__Firmicutes;c__Clostridia;o__Clostridiales;f__Ruminococcaceae;g__unidentified_Ruminococcaceae;s__unidentified_Ruminococcaceae	0.9659923012997588
ASV_979	d__Bacteria;p__Bacteroidetes;c__Bacteroidia;o__Bacteroidales;f__unidentified_Bacteroidales;g__unidentified_Bacteroidales;s__unidentified_Bacteroidales	0.9999876402132054
ASV_980	d__Bacteria;p__Firmicutes;c__Clostridia;o__Clostridiales;f__unidentified_Clostridiales;g__unidentified_Clostridiales;s__unidentified_Clostridiales	0.982045221355914
ASV_981	d__Bacteria;p__Bacteroidetes;c__Bacteroidia;o__Bacteroidales;f__unidentified_Bacteroidales;g__unidentified_Bacteroidales;s__unidentified_Bacteroidales	0.9876102958051501
ASV_982	d__Bacteria;p__Bacteroidetes;c__Bacteroidia;o__Bacteroidales;f__S24-7;g__unidentified_S24-7;s__unidentified_S24-7	0.999999943388987
ASV_983	d__Bacteria;p__Firmicutes;c__Clostridia;o__Clostridiales;f__Ruminococcaceae;g__unidentified_Ruminococcaceae;s__unidentified_Ruminococcaceae	0.952827635342906
ASV_984	d__Bacteria;p__unidentified_Bacteria;c__unidentified_Bacteria;o__unidentified_Bacteria;f__unidentified_Bacteria;g__unidentified_Bacteria;s__unidentified_Bacteria	0.8379097349807273
ASV_985	d__Bacteria;p__Bacteroidetes;c__Bacteroidia;o__Bacteroidales;f__[Paraprevotellaceae];g__[Prevotella];s__unidentified_[Prevotella]	0.9823224259218958
ASV_986	d__Bacteria;p__Acidobacteria;c__Solibacteres;o__Solibacterales;f__unclassified_Solibacterales;g__unclassified_Solibacterales;s__unclassified_Solibacterales	0.873772352853709
ASV_987	d__Bacteria;p__unidentified_Bacteria;c__unidentified_Bacteria;o__unidentified_Bacteria;f__unidentified_Bacteria;g__unidentified_Bacteria;s__unidentified_Bacteria	0.9509142523615166
ASV_988	d__Bacteria;p__Firmicutes;c__Clostridia;o__Clostridiales;f__Ruminococcaceae;g__unidentified_Ruminococcaceae;s__unidentified_Ruminococcaceae	0.9287764753728966
ASV_989	d__Bacteria;p__Firmicutes;c__Clostridia;o__Clostridiales;f__unidentified_Clostridiales;g__unidentified_Clostridiales;s__unidentified_Clostridiales	0.9997584844753089
ASV_990	d__Bacteria;p__unidentified_Bacteria;c__unidentified_Bacteria;o__unidentified_Bacteria;f__unidentified_Bacteria;g__unidentified_Bacteria;s__unidentified_Bacteria	0.9927499697070925
ASV_991	d__Bacteria;p__Firmicutes;c__Clostridia;o__Clostridiales;f__Clostridiaceae;g__Clostridium;s__unidentified_Clostridium	0.9992231600942909
ASV_992	d__Bacteria;p__Firmicutes;c__Clostridia;o__Clostridiales;f__Peptostreptococcaceae;g__unidentified_Peptostreptococcaceae;s__unidentified_Peptostreptococcaceae	0.9110545545797761
ASV_993	d__Bacteria;p__Firmicutes;c__Clostridia;o__Clostridiales;f__Ruminococcaceae;g__unidentified_Ruminococcaceae;s__unidentified_Ruminococcaceae	0.9209947675407227
ASV_994	d__Bacteria;p__OD1;c__ZB2;o__unidentified_ZB2;f__unidentified_ZB2;g__unidentified_ZB2;s__unidentified_ZB2	0.9998420538289667
ASV_995	d__Bacteria;p__Proteobacteria;c__Betaproteobacteria;o__SC-I-84;f__unidentified_SC-I-84;g__unidentified_SC-I-84;s__unidentified_SC-I-84	0.9999968207136709
ASV_996	d__Bacteria;p__Proteobacteria;c__Gammaproteobacteria;o__Enterobacteriales;f__Enterobacteriaceae;g__unclassified_Enterobacteriaceae;s__unclassified_Enterobacteriaceae	0.9742273377216357
ASV_997	d__Bacteria;p__Firmicutes;c__Clostridia;o__Clostridiales;f__unidentified_Clostridiales;g__unidentified_Clostridiales;s__unidentified_Clostridiales	0.99647320545237
ASV_998	d__Bacteria;p__unidentified_Bacteria;c__unidentified_Bacteria;o__unidentified_Bacteria;f__unidentified_Bacteria;g__unidentified_Bacteria;s__unidentified_Bacteria	0.9077328633827125
ASV_999	d__Bacteria;p__Proteobacteria;c__Gammaproteobacteria;o__Enterobacteriales;f__Enterobacteriaceae;g__unclassified_Enterobacteriaceae;s__unclassified_Enterobacteriaceae	0.9203536720372124
ASV_1000	d__Bacteria;p__Acidobacteria;c__Acidobacteriia;o__Acidobacteriales;f__Acidobacteriaceae;g__unclassified_Acidobacteriaceae;s__unclassified_Acidobacteriaceae	0.8937941564125566
ASV_1001	d__Bacteria;p__Firmicutes;c__Clostridia;o__Clostridiales;f__Ruminococcaceae;g__unidentified_Ruminococcaceae;s__unidentified_Ruminococcaceae	0.9995432654307475
ASV_1002	d__Bacteria;p__Firmicutes;c__Clostridia;o__Clostridiales;f__unidentified_Clostridiales;g__unidentified_Clostridiales;s__unidentified_Clostridiales	0.9999838117190127
ASV_1003	d__Bacteria;p__Bacteroidetes;c__Bacteroidia;o__Bacteroidales;f__Prevotellaceae;g__Prevotella;s__unidentified_Prevotella	0.9999416124695393
ASV_1004	d__Bacteria;p__Bacteroidetes;c__Bacteroidia;o__Bacteroidales;f__Prevotellaceae;g__Prevotella;s__unidentified_Prevotella	0.9994792517673082
ASV_1005	d__Bacteria;p__Firmicutes;c__Clostridia;o__Clostridiales;f__unidentified_Clostridiales;g__unidentified_Clostridiales;s__unidentified_Clostridiales	0.7070630274851007
ASV_1006	d__Bacteria;p__Proteobacteria;c__Alphaproteobacteria;o__unclassified_Alphaproteobacteria;f__unclassified_Alphaproteobacteria;g__unclassified_Alphaproteobacteria;s__unclassified_Alphaproteobacteria	0.9295753683709344
ASV_1007	d__Bacteria;p__Proteobacteria;c__Alphaproteobacteria;o__unclassified_Alphaproteobacteria;f__unclassified_Alphaproteobacteria;g__unclassified_Alphaproteobacteria;s__unclassified_Alphaproteobacteria	0.9997041303644278
ASV_1008	d__Bacteria;p__Bacteroidetes;c__Bacteroidia;o__Bacteroidales;f__Bacteroidaceae;g__Bacteroides;s__unidentified_Bacteroides	0.9565939784759622
ASV_1009	d__Bacteria;p__Proteobacteria;c__Betaproteobacteria;o__Burkholderiales;f__Comamonadaceae;g__unclassified_Comamonadaceae;s__unclassified_Comamonadaceae	0.9176108559360336
ASV_1010	d__Bacteria;p__Proteobacteria;c__Alphaproteobacteria;o__unidentified_Alphaproteobacteria;f__unidentified_Alphaproteobacteria;g__unidentified_Alphaproteobacteria;s__unidentified_Alphaproteobacteria	0.9909346532786665
ASV_1011	d__Bacteria;p__Firmicutes;c__Clostridia;o__Clostridiales;f__Ruminococcaceae;g__unidentified_Ruminococcaceae;s__unidentified_Ruminococcaceae	0.994275813058205
ASV_1012	d__Bacteria;p__Verrucomicrobia;c__Verrucomicrobiae;o__Verrucomicrobiales;f__Verrucomicrobiaceae;g__Akkermansia;s__Akkermansia_muciniphila	0.9998968170821134
ASV_1013	d__Bacteria;p__Proteobacteria;c__Alphaproteobacteria;o__Ellin329;f__unidentified_Ellin329;g__unidentified_Ellin329;s__unidentified_Ellin329	0.9445278907325961
ASV_1014	d__Bacteria;p__Firmicutes;c__Clostridia;o__Clostridiales;f__unidentified_Clostridiales;g__unidentified_Clostridiales;s__unidentified_Clostridiales	0.9941966170998763
ASV_1015	d__Bacteria;p__Firmicutes;c__Bacilli;o__Lactobacillales;f__Lactobacillaceae;g__Lactobacillus;s__unidentified_Lactobacillus	0.8138983187439492
ASV_1016	d__Bacteria;p__Firmicutes;c__Clostridia;o__Clostridiales;f__Clostridiaceae;g__Clostridium;s__unidentified_Clostridium	0.9717825355730267
ASV_1017	d__Bacteria;p__Firmicutes;c__Clostridia;o__Clostridiales;f__Ruminococcaceae;g__Faecalibacterium;s__Faecalibacterium_prausnitzii	0.9055486374343247
ASV_1018	d__Bacteria;p__Proteobacteria;c__Alphaproteobacteria;o__unidentified_Alphaproteobacteria;f__unidentified_Alphaproteobacteria;g__unidentified_Alphaproteobacteria;s__unidentified_Alphaproteobacteria	0.7601373433144016
ASV_1019	d__Bacteria;p__Actinobacteria;c__Actinobacteria;o__Actinomycetales;f__Micromonosporaceae;g__unclassified_Micromonosporaceae;s__unclassified_Micromonosporaceae	0.9303346152988085
ASV_1020	d__Bacteria;p__unclassified_Bacteria;c__unclassified_Bacteria;o__unclassified_Bacteria;f__unclassified_Bacteria;g__unclassified_Bacteria;s__unclassified_Bacteria	0.9999999999993479
ASV_1021	d__Bacteria;p__Firmicutes;c__Clostridia;o__Clostridiales;f__Peptostreptococcaceae;g__Clostridium;s__Clostridium_ruminantium	0.7276942317077648
ASV_1022	d__Bacteria;p__Actinobacteria;c__Actinobacteria;o__Actinomycetales;f__Micrococcaceae;g__Arthrobacter;s__unclassified_Arthrobacter	0.959112533991561
ASV_1023	d__Bacteria;p__Proteobacteria;c__Deltaproteobacteria;o__Bdellovibrionales;f__Bdellovibrionaceae;g__Bdellovibrio;s__unidentified_Bdellovibrio	0.9999823424452108
ASV_1024	d__Bacteria;p__Firmicutes;c__Clostridia;o__Clostridiales;f__Lachnospiraceae;g__unidentified_Lachnospiraceae;s__unidentified_Lachnospiraceae	0.9527379945901742
ASV_1025	d__Bacteria;p__Actinobacteria;c__Actinobacteria;o__Actinomycetales;f__Nocardioidaceae;g__unclassified_Nocardioidaceae;s__unclassified_Nocardioidaceae	0.8229560042185221
ASV_1026	d__Bacteria;p__Firmicutes;c__Clostridia;o__Clostridiales;f__Lachnospiraceae;g__unidentified_Lachnospiraceae;s__unidentified_Lachnospiraceae	0.7237456074398353
ASV_1027	d__Bacteria;p__Bacteroidetes;c__Bacteroidia;o__Bacteroidales;f__[Paraprevotellaceae];g__unidentified_[Paraprevotellaceae];s__unidentified_[Paraprevotellaceae]	0.8814000656806976
ASV_1028	d__Bacteria;p__Proteobacteria;c__Betaproteobacteria;o__Burkholderiales;f__Comamonadaceae;g__unclassified_Comamonadaceae;s__unclassified_Comamonadaceae	0.9994257875286188
ASV_1029	d__Bacteria;p__Firmicutes;c__Clostridia;o__Clostridiales;f__Ruminococcaceae;g__Ruminococcus;s__unidentified_Ruminococcus	0.8893402573460427
ASV_1030	d__Bacteria;p__unclassified_Bacteria;c__unclassified_Bacteria;o__unclassified_Bacteria;f__unclassified_Bacteria;g__unclassified_Bacteria;s__unclassified_Bacteria	0.9999999999999872
ASV_1031	d__Bacteria;p__Chloroflexi;c__Thermomicrobia;o__unidentified_Thermomicrobia;f__unidentified_Thermomicrobia;g__unidentified_Thermomicrobia;s__unidentified_Thermomicrobia	0.9999715405865816
ASV_1032	d__Bacteria;p__Firmicutes;c__Clostridia;o__Clostridiales;f__Peptostreptococcaceae;g__unidentified_Peptostreptococcaceae;s__unidentified_Peptostreptococcaceae	0.9367342546356374
ASV_1033	d__Bacteria;p__Bacteroidetes;c__Bacteroidia;o__Bacteroidales;f__S24-7;g__unidentified_S24-7;s__unidentified_S24-7	0.9912868769266964
ASV_1034	d__Bacteria;p__Proteobacteria;c__Betaproteobacteria;o__Burkholderiales;f__Comamonadaceae;g__Schlegelella;s__unidentified_Schlegelella	0.9337223301107661
ASV_1035	d__Bacteria;p__unclassified_Bacteria;c__unclassified_Bacteria;o__unclassified_Bacteria;f__unclassified_Bacteria;g__unclassified_Bacteria;s__unclassified_Bacteria	0.9999999999798206
ASV_1036	d__Bacteria;p__Firmicutes;c__Bacilli;o__Lactobacillales;f__Streptococcaceae;g__Streptococcus;s__unidentified_Streptococcus	0.9986466175942739
ASV_1037	d__Bacteria;p__Firmicutes;c__Clostridia;o__Clostridiales;f__Ruminococcaceae;g__Oscillospira;s__unidentified_Oscillospira	0.9951061884375374
ASV_1038	d__Bacteria;p__Firmicutes;c__Clostridia;o__Clostridiales;f__Ruminococcaceae;g__unidentified_Ruminococcaceae;s__unidentified_Ruminococcaceae	0.9425100422401372
ASV_1039	d__Bacteria;p__unidentified_Bacteria;c__unidentified_Bacteria;o__unidentified_Bacteria;f__unidentified_Bacteria;g__unidentified_Bacteria;s__unidentified_Bacteria	0.9682525423521793
ASV_1040	d__Bacteria;p__Proteobacteria;c__Alphaproteobacteria;o__Rhodospirillales;f__Rhodospirillaceae;g__Reyranella;s__Reyranella_massiliensis	0.9337820993738684
ASV_1041	d__Bacteria;p__Proteobacteria;c__Alphaproteobacteria;o__Rhodospirillales;f__Acetobacteraceae;g__unclassified_Acetobacteraceae;s__unclassified_Acetobacteraceae	0.9883314705831787
ASV_1042	d__Bacteria;p__Proteobacteria;c__Gammaproteobacteria;o__Xanthomonadales;f__Sinobacteraceae;g__unidentified_Sinobacteraceae;s__unidentified_Sinobacteraceae	0.9187921119937866
ASV_1043	d__Bacteria;p__Firmicutes;c__Clostridia;o__Clostridiales;f__Ruminococcaceae;g__Ruminococcus;s__unidentified_Ruminococcus	0.9998662833513614
ASV_1044	d__Bacteria;p__Firmicutes;c__Clostridia;o__Clostridiales;f__Ruminococcaceae;g__unidentified_Ruminococcaceae;s__unidentified_Ruminococcaceae	0.9914151757898355
ASV_1045	d__Bacteria;p__Proteobacteria;c__Betaproteobacteria;o__unclassified_Betaproteobacteria;f__unclassified_Betaproteobacteria;g__unclassified_Betaproteobacteria;s__unclassified_Betaproteobacteria	0.7185148185323522
ASV_1046	d__Bacteria;p__Firmicutes;c__Clostridia;o__Clostridiales;f__Ruminococcaceae;g__Oscillospira;s__unidentified_Oscillospira	0.9997859264899607
ASV_1047	d__Bacteria;p__Firmicutes;c__Clostridia;o__Clostridiales;f__unidentified_Clostridiales;g__unidentified_Clostridiales;s__unidentified_Clostridiales	0.9967085811143198
ASV_1048	d__Bacteria;p__Proteobacteria;c__Alphaproteobacteria;o__Rhodospirillales;f__Rhodospirillaceae;g__unclassified_Rhodospirillaceae;s__unclassified_Rhodospirillaceae	0.7310045206665515
ASV_1049	d__Bacteria;p__Proteobacteria;c__Gammaproteobacteria;o__Legionellales;f__unclassified_Legionellales;g__unclassified_Legionellales;s__unclassified_Legionellales	0.8202233205269199
ASV_1050	d__Bacteria;p__Synergistetes;c__Synergistia;o__Synergistales;f__Synergistaceae;g__Synergistes;s__unidentified_Synergistes	0.953219386590286
ASV_1051	d__Bacteria;p__Proteobacteria;c__unclassified_Proteobacteria;o__unclassified_Proteobacteria;f__unclassified_Proteobacteria;g__unclassified_Proteobacteria;s__unclassified_Proteobacteria	0.7284660691263154
ASV_1052	d__Bacteria;p__Firmicutes;c__Bacilli;o__Lactobacillales;f__Enterococcaceae;g__Enterococcus;s__Enterococcus_sulfureus	0.8355368788946133
ASV_1053	d__Bacteria;p__Proteobacteria;c__Gammaproteobacteria;o__Pseudomonadales;f__Moraxellaceae;g__unidentified_Moraxellaceae;s__unidentified_Moraxellaceae	0.9857180648558175
ASV_1054	d__Bacteria;p__Proteobacteria;c__Alphaproteobacteria;o__Rhodospirillales;f__Acetobacteraceae;g__unidentified_Acetobacteraceae;s__unidentified_Acetobacteraceae	0.9933201592556359
ASV_1055	d__Bacteria;p__Firmicutes;c__Clostridia;o__Clostridiales;f__Christensenellaceae;g__unidentified_Christensenellaceae;s__unidentified_Christensenellaceae	0.9183631894435382
ASV_1056	d__Bacteria;p__Bacteroidetes;c__Bacteroidia;o__Bacteroidales;f__S24-7;g__unidentified_S24-7;s__unidentified_S24-7	0.9988065399431406
ASV_1057	d__Bacteria;p__Proteobacteria;c__Gammaproteobacteria;o__Legionellales;f__Legionellaceae;g__unclassified_Legionellaceae;s__unclassified_Legionellaceae	0.9999710369760846
ASV_1058	d__Bacteria;p__unidentified_Bacteria;c__unidentified_Bacteria;o__unidentified_Bacteria;f__unidentified_Bacteria;g__unidentified_Bacteria;s__unidentified_Bacteria	0.9985008488634697
ASV_1059	d__Bacteria;p__Firmicutes;c__Clostridia;o__Clostridiales;f__Ruminococcaceae;g__unidentified_Ruminococcaceae;s__unidentified_Ruminococcaceae	0.9788082623971625
ASV_1060	d__Bacteria;p__Actinobacteria;c__Actinobacteria;o__Actinomycetales;f__unidentified_Actinomycetales;g__unidentified_Actinomycetales;s__unidentified_Actinomycetales	0.9121713094809903
ASV_1061	d__Bacteria;p__Bacteroidetes;c__Bacteroidia;o__Bacteroidales;f__unclassified_Bacteroidales;g__unclassified_Bacteroidales;s__unclassified_Bacteroidales	0.7010797010349563
ASV_1062	d__Bacteria;p__Firmicutes;c__Clostridia;o__Clostridiales;f__unidentified_Clostridiales;g__unidentified_Clostridiales;s__unidentified_Clostridiales	0.9522422307901837
ASV_1063	d__Bacteria;p__Acidobacteria;c__Solibacteres;o__Solibacterales;f__Solibacteraceae;g__Candidatus_Solibacter;s__unidentified_Candidatus_Solibacter	0.9999875129398138
ASV_1064	d__Bacteria;p__Actinobacteria;c__Actinobacteria;o__Actinomycetales;f__Micrococcaceae;g__Arthrobacter;s__Arthrobacter_sulfureus	0.716007181787086
ASV_1065	d__Bacteria;p__Firmicutes;c__Clostridia;o__Clostridiales;f__unclassified_Clostridiales;g__unclassified_Clostridiales;s__unclassified_Clostridiales	0.7738089081127525
ASV_1066	d__Bacteria;p__Firmicutes;c__Clostridia;o__Clostridiales;f__unidentified_Clostridiales;g__unidentified_Clostridiales;s__unidentified_Clostridiales	0.8171278670664581
ASV_1067	d__Bacteria;p__Firmicutes;c__Clostridia;o__Clostridiales;f__Ruminococcaceae;g__unidentified_Ruminococcaceae;s__unidentified_Ruminococcaceae	0.8404457680947143
ASV_1068	d__Bacteria;p__Firmicutes;c__Clostridia;o__Clostridiales;f__Peptostreptococcaceae;g__unclassified_Peptostreptococcaceae;s__unclassified_Peptostreptococcaceae	0.9859874649123336
ASV_1069	d__Bacteria;p__Actinobacteria;c__Actinobacteria;o__Actinomycetales;f__unclassified_Actinomycetales;g__unclassified_Actinomycetales;s__unclassified_Actinomycetales	0.9997107994986912
ASV_1070	d__Bacteria;p__Firmicutes;c__Clostridia;o__Clostridiales;f__unidentified_Clostridiales;g__unidentified_Clostridiales;s__unidentified_Clostridiales	0.9998583988148763
ASV_1071	d__Bacteria;p__Firmicutes;c__unclassified_Firmicutes;o__unclassified_Firmicutes;f__unclassified_Firmicutes;g__unclassified_Firmicutes;s__unclassified_Firmicutes	0.820370050758903
ASV_1072	d__Bacteria;p__Actinobacteria;c__Actinobacteria;o__Actinomycetales;f__unidentified_Actinomycetales;g__unidentified_Actinomycetales;s__unidentified_Actinomycetales	0.8868115480395864
ASV_1073	d__Bacteria;p__Firmicutes;c__Clostridia;o__Clostridiales;f__Lachnospiraceae;g__unclassified_Lachnospiraceae;s__unclassified_Lachnospiraceae	0.7567747145885004
ASV_1074	d__Bacteria;p__Firmicutes;c__Clostridia;o__Clostridiales;f__Clostridiaceae;g__Clostridium;s__Clostridium_perfringens	0.9937605210923641
ASV_1075	d__Bacteria;p__Proteobacteria;c__Alphaproteobacteria;o__Rhizobiales;f__Bradyrhizobiaceae;g__unclassified_Bradyrhizobiaceae;s__unclassified_Bradyrhizobiaceae	0.9988591350442272
ASV_1076	d__Bacteria;p__Bacteroidetes;c__Bacteroidia;o__Bacteroidales;f__Bacteroidaceae;g__Bacteroides;s__unidentified_Bacteroides	0.9999999604973774
ASV_1077	d__Bacteria;p__Firmicutes;c__Clostridia;o__Clostridiales;f__[Mogibacteriaceae];g__unidentified_[Mogibacteriaceae];s__unidentified_[Mogibacteriaceae]	0.73314916610748
ASV_1078	d__Bacteria;p__Proteobacteria;c__Gammaproteobacteria;o__unclassified_Gammaproteobacteria;f__unclassified_Gammaproteobacteria;g__unclassified_Gammaproteobacteria;s__unclassified_Gammaproteobacteria	0.9999731455830779
ASV_1079	d__Bacteria;p__Firmicutes;c__Clostridia;o__Clostridiales;f__Lachnospiraceae;g__unidentified_Lachnospiraceae;s__unidentified_Lachnospiraceae	0.7077686169527346
ASV_1080	d__Bacteria;p__Tenericutes;c__Mollicutes;o__unclassified_Mollicutes;f__unclassified_Mollicutes;g__unclassified_Mollicutes;s__unclassified_Mollicutes	0.7574190115200232
ASV_1081	d__Bacteria;p__unclassified_Bacteria;c__unclassified_Bacteria;o__unclassified_Bacteria;f__unclassified_Bacteria;g__unclassified_Bacteria;s__unclassified_Bacteria	0.999999932543582
ASV_1082	d__Bacteria;p__Actinobacteria;c__Actinobacteria;o__Actinomycetales;f__Microbacteriaceae;g__Leifsonia;s__unclassified_Leifsonia	0.8168853694437574
ASV_1083	d__Bacteria;p__unidentified_Bacteria;c__unidentified_Bacteria;o__unidentified_Bacteria;f__unidentified_Bacteria;g__unidentified_Bacteria;s__unidentified_Bacteria	0.9944551898394725
ASV_1084	d__Bacteria;p__Firmicutes;c__Clostridia;o__Clostridiales;f__[Mogibacteriaceae];g__unidentified_[Mogibacteriaceae];s__unidentified_[Mogibacteriaceae]	0.9864966841204957
ASV_1085	d__Bacteria;p__Firmicutes;c__Clostridia;o__Clostridiales;f__Ruminococcaceae;g__unidentified_Ruminococcaceae;s__unidentified_Ruminococcaceae	0.9934810970433973
ASV_1086	d__Bacteria;p__unclassified_Bacteria;c__unclassified_Bacteria;o__unclassified_Bacteria;f__unclassified_Bacteria;g__unclassified_Bacteria;s__unclassified_Bacteria	0.9999999879101575
ASV_1087	d__Bacteria;p__Bacteroidetes;c__Bacteroidia;o__Bacteroidales;f__S24-7;g__unidentified_S24-7;s__unidentified_S24-7	0.9978219474861523
ASV_1088	d__Bacteria;p__Firmicutes;c__Bacilli;o__Lactobacillales;f__Lactobacillaceae;g__Lactobacillus;s__Lactobacillus_vaginalis	0.9256505178205173
ASV_1089	d__Bacteria;p__Actinobacteria;c__Thermoleophilia;o__Gaiellales;f__Gaiellaceae;g__unidentified_Gaiellaceae;s__unidentified_Gaiellaceae	0.9999654784197612
ASV_1090	d__Bacteria;p__Proteobacteria;c__Gammaproteobacteria;o__Xanthomonadales;f__Xanthomonadaceae;g__unclassified_Xanthomonadaceae;s__unclassified_Xanthomonadaceae	0.9324873133591761
ASV_1091	d__Bacteria;p__Actinobacteria;c__Actinobacteria;o__Actinomycetales;f__Micrococcaceae;g__Arthrobacter;s__unclassified_Arthrobacter	0.9798880286537758
ASV_1092	d__Bacteria;p__Firmicutes;c__Clostridia;o__Clostridiales;f__unidentified_Clostridiales;g__unidentified_Clostridiales;s__unidentified_Clostridiales	0.9870336717352742
ASV_1093	d__Bacteria;p__Proteobacteria;c__Gammaproteobacteria;o__Pseudomonadales;f__Moraxellaceae;g__Acinetobacter;s__unidentified_Acinetobacter	0.8167283737520918
ASV_1094	d__Bacteria;p__unidentified_Bacteria;c__unidentified_Bacteria;o__unidentified_Bacteria;f__unidentified_Bacteria;g__unidentified_Bacteria;s__unidentified_Bacteria	0.7203969108550603
ASV_1095	d__Bacteria;p__Firmicutes;c__Clostridia;o__Clostridiales;f__Ruminococcaceae;g__unidentified_Ruminococcaceae;s__unidentified_Ruminococcaceae	0.9708279716049286
ASV_1096	d__Bacteria;p__Actinobacteria;c__Actinobacteria;o__Actinomycetales;f__Nocardioidaceae;g__Nocardioides;s__unclassified_Nocardioides	0.9805267769281503
ASV_1097	d__Bacteria;p__Firmicutes;c__unclassified_Firmicutes;o__unclassified_Firmicutes;f__unclassified_Firmicutes;g__unclassified_Firmicutes;s__unclassified_Firmicutes	0.982179236834513
ASV_1098	d__Bacteria;p__Firmicutes;c__Clostridia;o__Clostridiales;f__unidentified_Clostridiales;g__unidentified_Clostridiales;s__unidentified_Clostridiales	0.9969046184309173
ASV_1099	d__Bacteria;p__Firmicutes;c__Clostridia;o__Clostridiales;f__Ruminococcaceae;g__unidentified_Ruminococcaceae;s__unidentified_Ruminococcaceae	0.9900456453025253
ASV_1100	d__Bacteria;p__Proteobacteria;c__Alphaproteobacteria;o__Rhizobiales;f__Rhizobiaceae;g__unclassified_Rhizobiaceae;s__unclassified_Rhizobiaceae	0.9957922948123538
ASV_1101	d__Bacteria;p__Gemmatimonadetes;c__Gemm-1;o__unidentified_Gemm-1;f__unidentified_Gemm-1;g__unidentified_Gemm-1;s__unidentified_Gemm-1	0.9999999972140472
ASV_1102	d__Bacteria;p__Proteobacteria;c__Gammaproteobacteria;o__Xanthomonadales;f__Xanthomonadaceae;g__unclassified_Xanthomonadaceae;s__unclassified_Xanthomonadaceae	0.7956406703865644
ASV_1103	d__Bacteria;p__Firmicutes;c__Clostridia;o__Clostridiales;f__[Mogibacteriaceae];g__unidentified_[Mogibacteriaceae];s__unidentified_[Mogibacteriaceae]	0.8769599512461753
ASV_1104	d__Bacteria;p__Firmicutes;c__Clostridia;o__Clostridiales;f__unidentified_Clostridiales;g__unidentified_Clostridiales;s__unidentified_Clostridiales	0.9955213093096831
ASV_1105	d__Bacteria;p__Firmicutes;c__Clostridia;o__Clostridiales;f__Ruminococcaceae;g__Oscillospira;s__unidentified_Oscillospira	0.9591996954533477
ASV_1106	d__Bacteria;p__Bacteroidetes;c__Bacteroidia;o__Bacteroidales;f__S24-7;g__unidentified_S24-7;s__unidentified_S24-7	0.9999998099775848
ASV_1107	d__Bacteria;p__Tenericutes;c__Mollicutes;o__RF39;f__unidentified_RF39;g__unidentified_RF39;s__unidentified_RF39	0.9999999988755235
ASV_1108	d__Bacteria;p__Firmicutes;c__Clostridia;o__Clostridiales;f__Ruminococcaceae;g__Ruminococcus;s__unidentified_Ruminococcus	0.8371738926954471
ASV_1109	d__Bacteria;p__Actinobacteria;c__Thermoleophilia;o__Gaiellales;f__Gaiellaceae;g__unidentified_Gaiellaceae;s__unidentified_Gaiellaceae	0.8898843669687088
ASV_1110	d__Bacteria;p__Firmicutes;c__Clostridia;o__Clostridiales;f__Ruminococcaceae;g__unidentified_Ruminococcaceae;s__unidentified_Ruminococcaceae	0.9855808371689225
ASV_1111	d__Bacteria;p__Firmicutes;c__Bacilli;o__Lactobacillales;f__Aerococcaceae;g__unclassified_Aerococcaceae;s__unclassified_Aerococcaceae	0.797057366621251
ASV_1112	d__Bacteria;p__Firmicutes;c__Clostridia;o__Clostridiales;f__unclassified_Clostridiales;g__unclassified_Clostridiales;s__unclassified_Clostridiales	0.9999941274761972
ASV_1113	d__Bacteria;p__Actinobacteria;c__Actinobacteria;o__Actinomycetales;f__Microbacteriaceae;g__unclassified_Microbacteriaceae;s__unclassified_Microbacteriaceae	0.9830769320665409
ASV_1114	d__Bacteria;p__Proteobacteria;c__Gammaproteobacteria;o__Pseudomonadales;f__Moraxellaceae;g__Acinetobacter;s__unidentified_Acinetobacter	0.9574748282215997
ASV_1115	d__Bacteria;p__Bacteroidetes;c__Bacteroidia;o__Bacteroidales;f__Prevotellaceae;g__Prevotella;s__Prevotella_copri	0.999955908460019
ASV_1116	d__Bacteria;p__Proteobacteria;c__Alphaproteobacteria;o__Caulobacterales;f__unidentified_Caulobacterales;g__unidentified_Caulobacterales;s__unidentified_Caulobacterales	0.76518741343402
ASV_1117	d__Bacteria;p__Proteobacteria;c__Betaproteobacteria;o__unclassified_Betaproteobacteria;f__unclassified_Betaproteobacteria;g__unclassified_Betaproteobacteria;s__unclassified_Betaproteobacteria	0.8015909867182627
ASV_1118	d__Bacteria;p__Firmicutes;c__Clostridia;o__Clostridiales;f__unidentified_Clostridiales;g__unidentified_Clostridiales;s__unidentified_Clostridiales	0.9933993210317572
ASV_1119	d__Bacteria;p__Proteobacteria;c__Alphaproteobacteria;o__Rhodobacterales;f__Hyphomonadaceae;g__unidentified_Hyphomonadaceae;s__unidentified_Hyphomonadaceae	0.9077806587427383
ASV_1120	d__Bacteria;p__Proteobacteria;c__Gammaproteobacteria;o__Enterobacteriales;f__Enterobacteriaceae;g__Plesiomonas;s__unclassified_Plesiomonas	0.7308096178062692
ASV_1121	d__Bacteria;p__Bacteroidetes;c__Sphingobacteriia;o__Sphingobacteriales;f__Sphingobacteriaceae;g__unclassified_Sphingobacteriaceae;s__unclassified_Sphingobacteriaceae	0.9999503711428667
ASV_1122	d__Bacteria;p__unidentified_Bacteria;c__unidentified_Bacteria;o__unidentified_Bacteria;f__unidentified_Bacteria;g__unidentified_Bacteria;s__unidentified_Bacteria	0.7451834799862463
ASV_1123	d__Bacteria;p__Firmicutes;c__Clostridia;o__Clostridiales;f__Ruminococcaceae;g__unidentified_Ruminococcaceae;s__unidentified_Ruminococcaceae	0.7124734279420898
ASV_1124	d__Bacteria;p__Firmicutes;c__Clostridia;o__Clostridiales;f__Peptostreptococcaceae;g__Clostridium;s__Clostridium_ruminantium	0.7223066497454148
ASV_1125	d__Bacteria;p__Proteobacteria;c__Alphaproteobacteria;o__Sphingomonadales;f__Sphingomonadaceae;g__Sphingomonas;s__unclassified_Sphingomonas	0.7332515186194596
ASV_1126	d__Bacteria;p__Firmicutes;c__Clostridia;o__Clostridiales;f__Lachnospiraceae;g__unclassified_Lachnospiraceae;s__unclassified_Lachnospiraceae	0.7228213947412325
ASV_1127	d__Bacteria;p__Proteobacteria;c__Gammaproteobacteria;o__Pseudomonadales;f__Moraxellaceae;g__Acinetobacter;s__unclassified_Acinetobacter	0.9837402691099463
ASV_1128	d__Bacteria;p__Firmicutes;c__Clostridia;o__Clostridiales;f__unidentified_Clostridiales;g__unidentified_Clostridiales;s__unidentified_Clostridiales	0.9972417883303988
ASV_1129	d__Bacteria;p__Firmicutes;c__Clostridia;o__Clostridiales;f__Ruminococcaceae;g__unidentified_Ruminococcaceae;s__unidentified_Ruminococcaceae	0.9807868134028936
ASV_1130	d__Bacteria;p__Proteobacteria;c__Alphaproteobacteria;o__Sphingomonadales;f__Erythrobacteraceae;g__unclassified_Erythrobacteraceae;s__unclassified_Erythrobacteraceae	0.9864828776047712
ASV_1131	d__Bacteria;p__Proteobacteria;c__Betaproteobacteria;o__Burkholderiales;f__Comamonadaceae;g__unclassified_Comamonadaceae;s__unclassified_Comamonadaceae	0.9749757293381832
ASV_1132	d__Bacteria;p__Actinobacteria;c__Actinobacteria;o__Actinomycetales;f__Thermomonosporaceae;g__Actinoallomurus;s__unidentified_Actinoallomurus	0.7149662753518948
ASV_1133	d__Bacteria;p__Tenericutes;c__Mollicutes;o__RF39;f__unidentified_RF39;g__unidentified_RF39;s__unidentified_RF39	0.9999999988213517
ASV_1134	d__Bacteria;p__TM7;c__TM7-1;o__unidentified_TM7-1;f__unidentified_TM7-1;g__unidentified_TM7-1;s__unidentified_TM7-1	0.9999636759079746
ASV_1135	d__Bacteria;p__Proteobacteria;c__Betaproteobacteria;o__Burkholderiales;f__Comamonadaceae;g__unclassified_Comamonadaceae;s__unclassified_Comamonadaceae	0.9536475402360161
ASV_1136	d__Bacteria;p__Actinobacteria;c__Actinobacteria;o__Actinomycetales;f__Microbacteriaceae;g__unclassified_Microbacteriaceae;s__unclassified_Microbacteriaceae	0.9636952402224002
ASV_1137	d__Bacteria;p__Firmicutes;c__Clostridia;o__Clostridiales;f__Clostridiaceae;g__unclassified_Clostridiaceae;s__unclassified_Clostridiaceae	0.999526068005834
ASV_1138	d__Bacteria;p__Firmicutes;c__Clostridia;o__Clostridiales;f__Ruminococcaceae;g__unclassified_Ruminococcaceae;s__unclassified_Ruminococcaceae	0.9996537360427872
ASV_1139	d__Bacteria;p__Proteobacteria;c__Gammaproteobacteria;o__Pseudomonadales;f__Moraxellaceae;g__unidentified_Moraxellaceae;s__unidentified_Moraxellaceae	0.9903680261589971
ASV_1140	d__Bacteria;p__Proteobacteria;c__Alphaproteobacteria;o__Sphingomonadales;f__Sphingomonadaceae;g__Sphingomonas;s__unclassified_Sphingomonas	0.7269952524951018
ASV_1141	d__Bacteria;p__Bacteroidetes;c__Bacteroidia;o__Bacteroidales;f__Bacteroidaceae;g__Bacteroides;s__unidentified_Bacteroides	0.9924543238099894
ASV_1142	d__Bacteria;p__Proteobacteria;c__Betaproteobacteria;o__unclassified_Betaproteobacteria;f__unclassified_Betaproteobacteria;g__unclassified_Betaproteobacteria;s__unclassified_Betaproteobacteria	0.8574675989371207
ASV_1143	d__Bacteria;p__Proteobacteria;c__Gammaproteobacteria;o__Xanthomonadales;f__Xanthomonadaceae;g__unidentified_Xanthomonadaceae;s__unidentified_Xanthomonadaceae	0.8445981666373953
ASV_1144	d__Bacteria;p__Firmicutes;c__Clostridia;o__Clostridiales;f__Ruminococcaceae;g__Ruminococcus;s__unidentified_Ruminococcus	0.8528448290327683
ASV_1145	d__Bacteria;p__Actinobacteria;c__Thermoleophilia;o__Solirubrobacterales;f__Solirubrobacteraceae;g__unidentified_Solirubrobacteraceae;s__unidentified_Solirubrobacteraceae	0.9762764815041707
ASV_1146	d__Bacteria;p__Proteobacteria;c__Gammaproteobacteria;o__Pseudomonadales;f__Moraxellaceae;g__Acinetobacter;s__unidentified_Acinetobacter	0.8882643434586233
ASV_1147	d__Bacteria;p__Actinobacteria;c__Actinobacteria;o__Bifidobacteriales;f__Bifidobacteriaceae;g__Bifidobacterium;s__Bifidobacterium_bifidum	0.7387719533366245
ASV_1148	d__Bacteria;p__Actinobacteria;c__Acidimicrobiia;o__Acidimicrobiales;f__unidentified_Acidimicrobiales;g__unidentified_Acidimicrobiales;s__unidentified_Acidimicrobiales	0.9998701223017434
ASV_1149	d__Bacteria;p__Bacteroidetes;c__Bacteroidia;o__Bacteroidales;f__Prevotellaceae;g__Prevotella;s__Prevotella_copri	0.9982593299295369
ASV_1150	d__Bacteria;p__Firmicutes;c__Clostridia;o__Clostridiales;f__Peptostreptococcaceae;g__unclassified_Peptostreptococcaceae;s__unclassified_Peptostreptococcaceae	0.9795477230803705
ASV_1151	d__Bacteria;p__Firmicutes;c__Clostridia;o__Clostridiales;f__Clostridiaceae;g__unclassified_Clostridiaceae;s__unclassified_Clostridiaceae	0.9997839206833941
ASV_1152	d__Bacteria;p__Firmicutes;c__Clostridia;o__Clostridiales;f__Clostridiaceae;g__unclassified_Clostridiaceae;s__unclassified_Clostridiaceae	0.9999982303598636
ASV_1153	d__Bacteria;p__Firmicutes;c__Clostridia;o__Clostridiales;f__Lachnospiraceae;g__unidentified_Lachnospiraceae;s__unidentified_Lachnospiraceae	0.9821666571360799
ASV_1154	d__Bacteria;p__Acidobacteria;c__Acidobacteriia;o__Acidobacteriales;f__Koribacteraceae;g__unidentified_Koribacteraceae;s__unidentified_Koribacteraceae	0.9999159209330977
ASV_1155	d__Bacteria;p__Actinobacteria;c__Actinobacteria;o__Actinomycetales;f__unidentified_Actinomycetales;g__unidentified_Actinomycetales;s__unidentified_Actinomycetales	0.719908615069179
ASV_1156	d__Bacteria;p__Firmicutes;c__Clostridia;o__Clostridiales;f__unidentified_Clostridiales;g__unidentified_Clostridiales;s__unidentified_Clostridiales	0.9910255079546585
ASV_1157	d__Bacteria;p__Firmicutes;c__Clostridia;o__Clostridiales;f__Lachnospiraceae;g__Coprococcus;s__unidentified_Coprococcus	0.9918020124472602
ASV_1158	d__Bacteria;p__unidentified_Bacteria;c__unidentified_Bacteria;o__unidentified_Bacteria;f__unidentified_Bacteria;g__unidentified_Bacteria;s__unidentified_Bacteria	0.7467934944697651
ASV_1159	d__Bacteria;p__Bacteroidetes;c__Bacteroidia;o__Bacteroidales;f__Prevotellaceae;g__Prevotella;s__unidentified_Prevotella	0.9999904932310519
ASV_1160	d__Bacteria;p__Proteobacteria;c__Betaproteobacteria;o__Burkholderiales;f__Comamonadaceae;g__unclassified_Comamonadaceae;s__unclassified_Comamonadaceae	0.9999674236406269
ASV_1161	d__Bacteria;p__Proteobacteria;c__Betaproteobacteria;o__Burkholderiales;f__Comamonadaceae;g__unclassified_Comamonadaceae;s__unclassified_Comamonadaceae	0.9971713725089285
ASV_1162	d__Bacteria;p__Actinobacteria;c__Thermoleophilia;o__Solirubrobacterales;f__unidentified_Solirubrobacterales;g__unidentified_Solirubrobacterales;s__unidentified_Solirubrobacterales	0.986942080085485
ASV_1163	d__Bacteria;p__Firmicutes;c__Clostridia;o__Clostridiales;f__unidentified_Clostridiales;g__unidentified_Clostridiales;s__unidentified_Clostridiales	0.8413897659772764
ASV_1164	d__Bacteria;p__Firmicutes;c__Clostridia;o__Clostridiales;f__Ruminococcaceae;g__unidentified_Ruminococcaceae;s__unidentified_Ruminococcaceae	0.903560484619153
ASV_1165	d__Bacteria;p__Proteobacteria;c__Betaproteobacteria;o__Burkholderiales;f__Comamonadaceae;g__Acidovorax;s__unclassified_Acidovorax	0.7610690798778399
ASV_1166	d__Bacteria;p__Firmicutes;c__Clostridia;o__Clostridiales;f__Ruminococcaceae;g__Oscillospira;s__unidentified_Oscillospira	0.984533398661183
ASV_1167	d__Bacteria;p__Firmicutes;c__Clostridia;o__Clostridiales;f__Ruminococcaceae;g__unidentified_Ruminococcaceae;s__unidentified_Ruminococcaceae	0.7268847438258713
ASV_1168	d__Bacteria;p__Bacteroidetes;c__Bacteroidia;o__Bacteroidales;f__unclassified_Bacteroidales;g__unclassified_Bacteroidales;s__unclassified_Bacteroidales	0.8718948042274148
ASV_1169	d__Bacteria;p__Firmicutes;c__Clostridia;o__Clostridiales;f__Ruminococcaceae;g__unidentified_Ruminococcaceae;s__unidentified_Ruminococcaceae	0.9964998204672744
ASV_1170	d__Bacteria;p__Proteobacteria;c__Alphaproteobacteria;o__Caulobacterales;f__Caulobacteraceae;g__Caulobacter;s__Caulobacter_vibrioides	0.9959048761924516
ASV_1171	d__Bacteria;p__Firmicutes;c__Clostridia;o__Clostridiales;f__unclassified_Clostridiales;g__unclassified_Clostridiales;s__unclassified_Clostridiales	0.9999999995704723
ASV_1172	d__Bacteria;p__Bacteroidetes;c__Bacteroidia;o__Bacteroidales;f__Rikenellaceae;g__unclassified_Rikenellaceae;s__unclassified_Rikenellaceae	0.9999999780395545
ASV_1173	d__Bacteria;p__unidentified_Bacteria;c__unidentified_Bacteria;o__unidentified_Bacteria;f__unidentified_Bacteria;g__unidentified_Bacteria;s__unidentified_Bacteria	0.9489066133904512
ASV_1174	d__Bacteria;p__Firmicutes;c__Clostridia;o__Clostridiales;f__unclassified_Clostridiales;g__unclassified_Clostridiales;s__unclassified_Clostridiales	0.9999999999608404
ASV_1175	d__Bacteria;p__Proteobacteria;c__Gammaproteobacteria;o__Xanthomonadales;f__Xanthomonadaceae;g__unclassified_Xanthomonadaceae;s__unclassified_Xanthomonadaceae	0.9994188659473584
ASV_1176	d__Bacteria;p__Bacteroidetes;c__Bacteroidia;o__Bacteroidales;f__S24-7;g__unidentified_S24-7;s__unidentified_S24-7	0.9999982471821071
ASV_1177	d__Bacteria;p__Firmicutes;c__Clostridia;o__Clostridiales;f__Christensenellaceae;g__unidentified_Christensenellaceae;s__unidentified_Christensenellaceae	0.998591336247617
ASV_1178	d__Bacteria;p__Proteobacteria;c__Deltaproteobacteria;o__Myxococcales;f__unidentified_Myxococcales;g__unidentified_Myxococcales;s__unidentified_Myxococcales	0.9991103400609491
ASV_1179	d__Bacteria;p__Actinobacteria;c__MB-A2-108;o__0319-7L14;f__unidentified_0319-7L14;g__unidentified_0319-7L14;s__unidentified_0319-7L14	0.9999998333764918
ASV_1180	d__Bacteria;p__Firmicutes;c__Bacilli;o__Bacillales;f__Planococcaceae;g__Aeribacillus;s__Aeribacillus_pallidus	0.9990480020078262
ASV_1181	d__Bacteria;p__Firmicutes;c__Clostridia;o__Clostridiales;f__Ruminococcaceae;g__Ruminococcus;s__unidentified_Ruminococcus	0.9128788165731453
ASV_1182	d__Bacteria;p__Actinobacteria;c__Actinobacteria;o__Actinomycetales;f__unclassified_Actinomycetales;g__unclassified_Actinomycetales;s__unclassified_Actinomycetales	0.9987547967073432
ASV_1183	d__Bacteria;p__unclassified_Bacteria;c__unclassified_Bacteria;o__unclassified_Bacteria;f__unclassified_Bacteria;g__unclassified_Bacteria;s__unclassified_Bacteria	0.9999999999795234
ASV_1184	d__Bacteria;p__unidentified_Bacteria;c__unidentified_Bacteria;o__unidentified_Bacteria;f__unidentified_Bacteria;g__unidentified_Bacteria;s__unidentified_Bacteria	0.959619270214292
ASV_1185	d__Bacteria;p__Proteobacteria;c__Alphaproteobacteria;o__unidentified_Alphaproteobacteria;f__unidentified_Alphaproteobacteria;g__unidentified_Alphaproteobacteria;s__unidentified_Alphaproteobacteria	0.9048684141618133
ASV_1186	d__Bacteria;p__Firmicutes;c__Clostridia;o__Clostridiales;f__unidentified_Clostridiales;g__unidentified_Clostridiales;s__unidentified_Clostridiales	0.9907327127199843
ASV_1187	d__Bacteria;p__Bacteroidetes;c__Bacteroidia;o__Bacteroidales;f__Bacteroidaceae;g__Bacteroides;s__unclassified_Bacteroides	0.9999999902323256
ASV_1188	d__Bacteria;p__Actinobacteria;c__Actinobacteria;o__Actinomycetales;f__unclassified_Actinomycetales;g__unclassified_Actinomycetales;s__unclassified_Actinomycetales	0.9927424902822742
ASV_1189	d__Bacteria;p__Proteobacteria;c__Alphaproteobacteria;o__Ellin329;f__unidentified_Ellin329;g__unidentified_Ellin329;s__unidentified_Ellin329	0.9970246641824763
ASV_1190	d__Bacteria;p__unidentified_Bacteria;c__unidentified_Bacteria;o__unidentified_Bacteria;f__unidentified_Bacteria;g__unidentified_Bacteria;s__unidentified_Bacteria	0.9681322838105693
ASV_1191	d__Bacteria;p__Proteobacteria;c__Alphaproteobacteria;o__Rhodospirillales;f__Rhodospirillaceae;g__unidentified_Rhodospirillaceae;s__unidentified_Rhodospirillaceae	0.9924567362360086
ASV_1192	d__Bacteria;p__Bacteroidetes;c__Bacteroidia;o__Bacteroidales;f__S24-7;g__unidentified_S24-7;s__unidentified_S24-7	0.998692349999645
ASV_1193	d__Bacteria;p__Firmicutes;c__Clostridia;o__Clostridiales;f__Ruminococcaceae;g__unidentified_Ruminococcaceae;s__unidentified_Ruminococcaceae	0.9089665584452364
ASV_1194	d__Bacteria;p__Firmicutes;c__Clostridia;o__Clostridiales;f__Peptostreptococcaceae;g__unclassified_Peptostreptococcaceae;s__unclassified_Peptostreptococcaceae	0.8800182251300961
ASV_1195	d__Bacteria;p__Firmicutes;c__Clostridia;o__Clostridiales;f__Ruminococcaceae;g__unidentified_Ruminococcaceae;s__unidentified_Ruminococcaceae	0.9940962664431524
ASV_1196	d__Bacteria;p__Actinobacteria;c__Actinobacteria;o__Actinomycetales;f__Microbacteriaceae;g__unclassified_Microbacteriaceae;s__unclassified_Microbacteriaceae	0.9974971284028259
ASV_1197	d__Bacteria;p__Firmicutes;c__Clostridia;o__Clostridiales;f__Ruminococcaceae;g__Oscillospira;s__unidentified_Oscillospira	0.9847423418815027
ASV_1198	d__Bacteria;p__Proteobacteria;c__Betaproteobacteria;o__Burkholderiales;f__Comamonadaceae;g__unclassified_Comamonadaceae;s__unclassified_Comamonadaceae	0.9967218882168051
ASV_1199	d__Bacteria;p__Firmicutes;c__Clostridia;o__unidentified_Clostridia;f__unidentified_Clostridia;g__unidentified_Clostridia;s__unidentified_Clostridia	0.8043106052928332
ASV_1200	d__Bacteria;p__GN04;c__GN15;o__unidentified_GN15;f__unidentified_GN15;g__unidentified_GN15;s__unidentified_GN15	0.9999856373423783
ASV_1201	d__Bacteria;p__Actinobacteria;c__Thermoleophilia;o__Gaiellales;f__Gaiellaceae;g__unidentified_Gaiellaceae;s__unidentified_Gaiellaceae	0.9996058097324414
ASV_1202	d__Bacteria;p__Firmicutes;c__Clostridia;o__Clostridiales;f__Christensenellaceae;g__unidentified_Christensenellaceae;s__unidentified_Christensenellaceae	0.9638332386376334
ASV_1203	d__Bacteria;p__Proteobacteria;c__Alphaproteobacteria;o__unidentified_Alphaproteobacteria;f__unidentified_Alphaproteobacteria;g__unidentified_Alphaproteobacteria;s__unidentified_Alphaproteobacteria	0.9869240434750861
ASV_1204	d__Bacteria;p__Acidobacteria;c__Acidobacteriia;o__Acidobacteriales;f__Acidobacteriaceae;g__unclassified_Acidobacteriaceae;s__unclassified_Acidobacteriaceae	0.7420112475288976
ASV_1205	d__Bacteria;p__Actinobacteria;c__Thermoleophilia;o__Gaiellales;f__Gaiellaceae;g__unidentified_Gaiellaceae;s__unidentified_Gaiellaceae	0.9998294116936494
ASV_1206	d__Bacteria;p__Proteobacteria;c__Alphaproteobacteria;o__unclassified_Alphaproteobacteria;f__unclassified_Alphaproteobacteria;g__unclassified_Alphaproteobacteria;s__unclassified_Alphaproteobacteria	0.9968552072114605
ASV_1207	d__Bacteria;p__Firmicutes;c__Clostridia;o__Clostridiales;f__Ruminococcaceae;g__unclassified_Ruminococcaceae;s__unclassified_Ruminococcaceae	0.9999022111011453
ASV_1208	d__Bacteria;p__Acidobacteria;c__Acidobacteria-6;o__iii1-15;f__unidentified_iii1-15;g__unidentified_iii1-15;s__unidentified_iii1-15	0.9990548525917307
ASV_1209	d__Bacteria;p__Firmicutes;c__Clostridia;o__Clostridiales;f__Clostridiaceae;g__unidentified_Clostridiaceae;s__unidentified_Clostridiaceae	0.7832476624228957
ASV_1210	d__Bacteria;p__Firmicutes;c__Clostridia;o__Clostridiales;f__Clostridiaceae;g__Proteiniclasticum;s__unidentified_Proteiniclasticum	0.9999924618650099
ASV_1211	d__Bacteria;p__Firmicutes;c__Bacilli;o__Bacillales;f__Bacillaceae;g__Bacillus;s__unclassified_Bacillus	0.9684422052120785
ASV_1212	d__Bacteria;p__Bacteroidetes;c__Bacteroidia;o__Bacteroidales;f__unidentified_Bacteroidales;g__unidentified_Bacteroidales;s__unidentified_Bacteroidales	0.9810639349514714
ASV_1213	d__Bacteria;p__Firmicutes;c__Clostridia;o__Clostridiales;f__unclassified_Clostridiales;g__unclassified_Clostridiales;s__unclassified_Clostridiales	0.9998537575211031
ASV_1214	d__Bacteria;p__Actinobacteria;c__Actinobacteria;o__Actinomycetales;f__unidentified_Actinomycetales;g__unidentified_Actinomycetales;s__unidentified_Actinomycetales	0.9280252138235314
ASV_1215	d__Bacteria;p__Firmicutes;c__Bacilli;o__Bacillales;f__Bacillaceae;g__Bacillus;s__unclassified_Bacillus	0.8166258535207593
ASV_1216	d__Bacteria;p__Firmicutes;c__Clostridia;o__Clostridiales;f__unidentified_Clostridiales;g__unidentified_Clostridiales;s__unidentified_Clostridiales	0.8374503225322731
ASV_1217	d__Bacteria;p__Bacteroidetes;c__Bacteroidia;o__Bacteroidales;f__Prevotellaceae;g__Prevotella;s__Prevotella_copri	0.9965394707806347
ASV_1218	d__Bacteria;p__Firmicutes;c__Clostridia;o__Clostridiales;f__Peptostreptococcaceae;g__unclassified_Peptostreptococcaceae;s__unclassified_Peptostreptococcaceae	0.8733241568973501
ASV_1219	d__Bacteria;p__Firmicutes;c__Clostridia;o__Clostridiales;f__unidentified_Clostridiales;g__unidentified_Clostridiales;s__unidentified_Clostridiales	0.9259303946841477
ASV_1220	d__Bacteria;p__Actinobacteria;c__Actinobacteria;o__Actinomycetales;f__Geodermatophilaceae;g__unclassified_Geodermatophilaceae;s__unclassified_Geodermatophilaceae	0.7590085375388507
ASV_1221	d__Bacteria;p__Firmicutes;c__Clostridia;o__Clostridiales;f__Ruminococcaceae;g__unidentified_Ruminococcaceae;s__unidentified_Ruminococcaceae	0.8161376446666627
ASV_1222	d__Bacteria;p__Firmicutes;c__Clostridia;o__Clostridiales;f__Ruminococcaceae;g__unidentified_Ruminococcaceae;s__unidentified_Ruminococcaceae	0.7540999572253924
ASV_1223	d__Bacteria;p__Firmicutes;c__Clostridia;o__Clostridiales;f__unidentified_Clostridiales;g__unidentified_Clostridiales;s__unidentified_Clostridiales	0.952111322978731
ASV_1224	d__Bacteria;p__Firmicutes;c__Clostridia;o__Clostridiales;f__Peptostreptococcaceae;g__Clostridium;s__Clostridium_ruminantium	0.8700700095636197
ASV_1225	d__Bacteria;p__Proteobacteria;c__Gammaproteobacteria;o__Pseudomonadales;f__Moraxellaceae;g__Acinetobacter;s__unidentified_Acinetobacter	0.9093454982146902
ASV_1226	d__Bacteria;p__Proteobacteria;c__Betaproteobacteria;o__unclassified_Betaproteobacteria;f__unclassified_Betaproteobacteria;g__unclassified_Betaproteobacteria;s__unclassified_Betaproteobacteria	0.9994794762259569
ASV_1227	d__Bacteria;p__Bacteroidetes;c__Flavobacteriia;o__Flavobacteriales;f__Flavobacteriaceae;g__Flavobacterium;s__Flavobacterium_frigidarium	0.9980841838987843
ASV_1228	d__Bacteria;p__Firmicutes;c__Clostridia;o__Clostridiales;f__Ruminococcaceae;g__unidentified_Ruminococcaceae;s__unidentified_Ruminococcaceae	0.7650420967143858
ASV_1229	d__Bacteria;p__Actinobacteria;c__Acidimicrobiia;o__Acidimicrobiales;f__EB1017;g__unidentified_EB1017;s__unidentified_EB1017	0.9999521743433426
ASV_1230	d__Bacteria;p__unidentified_Bacteria;c__unidentified_Bacteria;o__unidentified_Bacteria;f__unidentified_Bacteria;g__unidentified_Bacteria;s__unidentified_Bacteria	0.9950654199082811
ASV_1231	d__Bacteria;p__Firmicutes;c__Clostridia;o__Clostridiales;f__Ruminococcaceae;g__Ruminococcus;s__unidentified_Ruminococcus	0.7044818110609637
ASV_1232	d__Bacteria;p__Firmicutes;c__Clostridia;o__Clostridiales;f__unidentified_Clostridiales;g__unidentified_Clostridiales;s__unidentified_Clostridiales	0.9999848683635565
ASV_1233	d__Bacteria;p__Firmicutes;c__Clostridia;o__Clostridiales;f__unclassified_Clostridiales;g__unclassified_Clostridiales;s__unclassified_Clostridiales	0.9999938452246946
ASV_1234	d__Bacteria;p__Firmicutes;c__Clostridia;o__Clostridiales;f__Lachnospiraceae;g__unclassified_Lachnospiraceae;s__unclassified_Lachnospiraceae	0.7940027125273037
ASV_1235	d__Bacteria;p__Firmicutes;c__Clostridia;o__Clostridiales;f__Ruminococcaceae;g__unidentified_Ruminococcaceae;s__unidentified_Ruminococcaceae	0.9903223386640249
ASV_1236	d__Bacteria;p__Firmicutes;c__Clostridia;o__Clostridiales;f__unidentified_Clostridiales;g__unidentified_Clostridiales;s__unidentified_Clostridiales	0.9673677056765646
ASV_1237	d__Bacteria;p__Proteobacteria;c__Alphaproteobacteria;o__Rhizobiales;f__Bradyrhizobiaceae;g__unclassified_Bradyrhizobiaceae;s__unclassified_Bradyrhizobiaceae	0.9901125045450394
ASV_1238	d__Bacteria;p__Bacteroidetes;c__Bacteroidia;o__Bacteroidales;f__S24-7;g__unidentified_S24-7;s__unidentified_S24-7	0.9999527927965566
ASV_1239	d__Bacteria;p__Nitrospirae;c__Nitrospira;o__Nitrospirales;f__Nitrospiraceae;g__Nitrospira;s__unidentified_Nitrospira	0.999998045900616
ASV_1240	d__Bacteria;p__Firmicutes;c__Clostridia;o__Clostridiales;f__unclassified_Clostridiales;g__unclassified_Clostridiales;s__unclassified_Clostridiales	0.8129694695171367
ASV_1241	d__Bacteria;p__Firmicutes;c__Clostridia;o__Clostridiales;f__Ruminococcaceae;g__Oscillospira;s__unidentified_Oscillospira	0.9988060825832576
ASV_1242	d__Bacteria;p__Firmicutes;c__Clostridia;o__Clostridiales;f__Ruminococcaceae;g__unidentified_Ruminococcaceae;s__unidentified_Ruminococcaceae	0.9926470818544543
ASV_1243	d__Bacteria;p__Proteobacteria;c__Deltaproteobacteria;o__Myxococcales;f__unidentified_Myxococcales;g__unidentified_Myxococcales;s__unidentified_Myxococcales	0.9650827473538479
ASV_1244	d__Bacteria;p__Proteobacteria;c__Betaproteobacteria;o__Burkholderiales;f__Comamonadaceae;g__unclassified_Comamonadaceae;s__unclassified_Comamonadaceae	0.9998833259191368
ASV_1245	d__Bacteria;p__unclassified_Bacteria;c__unclassified_Bacteria;o__unclassified_Bacteria;f__unclassified_Bacteria;g__unclassified_Bacteria;s__unclassified_Bacteria	0.9999999999997407
ASV_1246	d__Bacteria;p__OP8;c__OP8_1;o__unidentified_OP8_1;f__unidentified_OP8_1;g__unidentified_OP8_1;s__unidentified_OP8_1	0.9999770801617743
ASV_1247	d__Bacteria;p__Firmicutes;c__Clostridia;o__Clostridiales;f__Lachnospiraceae;g__unclassified_Lachnospiraceae;s__unclassified_Lachnospiraceae	0.938725273604877
ASV_1248	d__Bacteria;p__Firmicutes;c__Clostridia;o__Clostridiales;f__unidentified_Clostridiales;g__unidentified_Clostridiales;s__unidentified_Clostridiales	0.9317891180992289
ASV_1249	d__Bacteria;p__Firmicutes;c__Clostridia;o__Clostridiales;f__Lachnospiraceae;g__unidentified_Lachnospiraceae;s__unidentified_Lachnospiraceae	0.8067702967539615
ASV_1250	d__Bacteria;p__Bacteroidetes;c__Bacteroidia;o__Bacteroidales;f__S24-7;g__unidentified_S24-7;s__unidentified_S24-7	0.967233488870375
ASV_1251	d__Bacteria;p__Firmicutes;c__Clostridia;o__Clostridiales;f__Ruminococcaceae;g__Ruminococcus;s__Ruminococcus_callidus	0.9674829158354729
ASV_1252	d__Bacteria;p__Firmicutes;c__Bacilli;o__unclassified_Bacilli;f__unclassified_Bacilli;g__unclassified_Bacilli;s__unclassified_Bacilli	0.9140795639271166
ASV_1253	d__Bacteria;p__Firmicutes;c__Clostridia;o__Clostridiales;f__Clostridiaceae;g__unclassified_Clostridiaceae;s__unclassified_Clostridiaceae	0.9999510915908839
ASV_1254	d__Bacteria;p__Verrucomicrobia;c__Verrucomicrobiae;o__Verrucomicrobiales;f__Verrucomicrobiaceae;g__unidentified_Verrucomicrobiaceae;s__unidentified_Verrucomicrobiaceae	0.999995675433951
ASV_1255	d__Bacteria;p__Firmicutes;c__Bacilli;o__Bacillales;f__Paenibacillaceae;g__Paenibacillus;s__unclassified_Paenibacillus	0.7269235248684253
ASV_1256	d__Bacteria;p__Firmicutes;c__Clostridia;o__Clostridiales;f__unidentified_Clostridiales;g__unidentified_Clostridiales;s__unidentified_Clostridiales	0.9550693630630808
ASV_1257	d__Bacteria;p__Proteobacteria;c__Gammaproteobacteria;o__Pseudomonadales;f__Moraxellaceae;g__unidentified_Moraxellaceae;s__unidentified_Moraxellaceae	0.707056396267991
ASV_1258	d__Bacteria;p__Firmicutes;c__Clostridia;o__Clostridiales;f__Lachnospiraceae;g__unclassified_Lachnospiraceae;s__unclassified_Lachnospiraceae	0.9776254345767407
ASV_1259	d__Bacteria;p__Proteobacteria;c__Betaproteobacteria;o__MND1;f__unidentified_MND1;g__unidentified_MND1;s__unidentified_MND1	0.9442171315614396
ASV_1260	d__Bacteria;p__Firmicutes;c__Bacilli;o__Lactobacillales;f__Lactobacillaceae;g__Lactobacillus;s__unclassified_Lactobacillus	0.7030926912899192
ASV_1261	d__Bacteria;p__Firmicutes;c__Clostridia;o__Clostridiales;f__unclassified_Clostridiales;g__unclassified_Clostridiales;s__unclassified_Clostridiales	0.9998972571154903
ASV_1262	d__Bacteria;p__Firmicutes;c__Clostridia;o__Clostridiales;f__unidentified_Clostridiales;g__unidentified_Clostridiales;s__unidentified_Clostridiales	0.9015060095312075
ASV_1263	d__Bacteria;p__Bacteroidetes;c__Bacteroidia;o__Bacteroidales;f__unclassified_Bacteroidales;g__unclassified_Bacteroidales;s__unclassified_Bacteroidales	0.9778322251397682
ASV_1264	d__Bacteria;p__Proteobacteria;c__Alphaproteobacteria;o__Sphingomonadales;f__Sphingomonadaceae;g__Sphingomonas;s__unidentified_Sphingomonas	0.9823286034293709
ASV_1265	d__Bacteria;p__Bacteroidetes;c__Bacteroidia;o__Bacteroidales;f__unidentified_Bacteroidales;g__unidentified_Bacteroidales;s__unidentified_Bacteroidales	0.9783891450345841
ASV_1266	d__Bacteria;p__Firmicutes;c__Clostridia;o__Clostridiales;f__unidentified_Clostridiales;g__unidentified_Clostridiales;s__unidentified_Clostridiales	0.9983843508841858
ASV_1267	d__Bacteria;p__Proteobacteria;c__Betaproteobacteria;o__Burkholderiales;f__Comamonadaceae;g__unclassified_Comamonadaceae;s__unclassified_Comamonadaceae	0.9973093935980276
ASV_1268	d__Bacteria;p__Firmicutes;c__Clostridia;o__Clostridiales;f__Lachnospiraceae;g__unidentified_Lachnospiraceae;s__unidentified_Lachnospiraceae	0.8848613754970167
ASV_1269	d__Bacteria;p__Cyanobacteria;c__4C0d-2;o__YS2;f__unidentified_YS2;g__unidentified_YS2;s__unidentified_YS2	0.9999999984655688
ASV_1270	d__Bacteria;p__Firmicutes;c__Bacilli;o__unclassified_Bacilli;f__unclassified_Bacilli;g__unclassified_Bacilli;s__unclassified_Bacilli	0.9999980841353003
ASV_1271	d__Bacteria;p__Proteobacteria;c__Deltaproteobacteria;o__Myxococcales;f__Cystobacteraceae;g__unclassified_Cystobacteraceae;s__unclassified_Cystobacteraceae	0.9918858275734306
ASV_1272	d__Bacteria;p__Firmicutes;c__Clostridia;o__Clostridiales;f__Ruminococcaceae;g__unclassified_Ruminococcaceae;s__unclassified_Ruminococcaceae	0.9999347928367539
ASV_1273	d__Bacteria;p__Firmicutes;c__Clostridia;o__Clostridiales;f__Ruminococcaceae;g__Oscillospira;s__unidentified_Oscillospira	0.9993187245574195
ASV_1274	d__Bacteria;p__Firmicutes;c__Clostridia;o__Clostridiales;f__Lachnospiraceae;g__unidentified_Lachnospiraceae;s__unidentified_Lachnospiraceae	0.9268969552730989
ASV_1275	d__Bacteria;p__Proteobacteria;c__Betaproteobacteria;o__Burkholderiales;f__Comamonadaceae;g__Leptothrix;s__unclassified_Leptothrix	0.7161982972454817
ASV_1276	d__Bacteria;p__Firmicutes;c__Clostridia;o__Clostridiales;f__unidentified_Clostridiales;g__unidentified_Clostridiales;s__unidentified_Clostridiales	0.8778510722476908
ASV_1277	d__Bacteria;p__Proteobacteria;c__Alphaproteobacteria;o__Rhodospirillales;f__Rhodospirillaceae;g__Reyranella;s__Reyranella_massiliensis	0.9872546210686994
ASV_1278	d__Bacteria;p__Firmicutes;c__Clostridia;o__Clostridiales;f__unidentified_Clostridiales;g__unidentified_Clostridiales;s__unidentified_Clostridiales	0.9922457811238257
ASV_1279	d__Bacteria;p__Bacteroidetes;c__Bacteroidia;o__Bacteroidales;f__unidentified_Bacteroidales;g__unidentified_Bacteroidales;s__unidentified_Bacteroidales	0.8207728166771814
ASV_1280	d__Bacteria;p__Firmicutes;c__Clostridia;o__Clostridiales;f__unclassified_Clostridiales;g__unclassified_Clostridiales;s__unclassified_Clostridiales	0.9999975151472921
ASV_1281	d__Bacteria;p__Firmicutes;c__Bacilli;o__Lactobacillales;f__Carnobacteriaceae;g__unclassified_Carnobacteriaceae;s__unclassified_Carnobacteriaceae	0.9900134214491194
ASV_1282	d__Bacteria;p__Proteobacteria;c__Gammaproteobacteria;o__Enterobacteriales;f__Enterobacteriaceae;g__unclassified_Enterobacteriaceae;s__unclassified_Enterobacteriaceae	0.9999999351827079
ASV_1283	d__Bacteria;p__Firmicutes;c__Clostridia;o__Clostridiales;f__Lachnospiraceae;g__unclassified_Lachnospiraceae;s__unclassified_Lachnospiraceae	0.8714293917432858
ASV_1284	d__Bacteria;p__Firmicutes;c__Clostridia;o__Clostridiales;f__Veillonellaceae;g__unidentified_Veillonellaceae;s__unidentified_Veillonellaceae	0.9891676356430918
ASV_1285	d__Bacteria;p__Firmicutes;c__Clostridia;o__Clostridiales;f__Ruminococcaceae;g__unidentified_Ruminococcaceae;s__unidentified_Ruminococcaceae	0.9820194844011875
ASV_1286	d__Bacteria;p__Firmicutes;c__Clostridia;o__Clostridiales;f__Lachnospiraceae;g__Epulopiscium;s__unidentified_Epulopiscium	0.9928678439523492
ASV_1287	d__Bacteria;p__Firmicutes;c__Clostridia;o__Clostridiales;f__Ruminococcaceae;g__Ruminococcus;s__Ruminococcus_flavefaciens	0.999771854321935
ASV_1288	d__Bacteria;p__Bacteroidetes;c__Bacteroidia;o__Bacteroidales;f__unclassified_Bacteroidales;g__unclassified_Bacteroidales;s__unclassified_Bacteroidales	0.9999970256940017
ASV_1289	d__Bacteria;p__Firmicutes;c__Clostridia;o__Clostridiales;f__unidentified_Clostridiales;g__unidentified_Clostridiales;s__unidentified_Clostridiales	0.999992564101425
ASV_1290	d__Bacteria;p__Proteobacteria;c__Betaproteobacteria;o__Burkholderiales;f__Comamonadaceae;g__unclassified_Comamonadaceae;s__unclassified_Comamonadaceae	0.9984468765523956
ASV_1291	d__Bacteria;p__Firmicutes;c__Bacilli;o__Lactobacillales;f__Lactobacillaceae;g__Lactobacillus;s__Lactobacillus_vaginalis	0.820760277060903
ASV_1292	d__Bacteria;p__Actinobacteria;c__Actinobacteria;o__Actinomycetales;f__Thermomonosporaceae;g__Actinoallomurus;s__Actinoallomurus_iriomotensis	0.7926014725536941
ASV_1293	d__Bacteria;p__Tenericutes;c__Mollicutes;o__RF39;f__unidentified_RF39;g__unidentified_RF39;s__unidentified_RF39	0.9999999987235526
ASV_1294	d__Bacteria;p__Firmicutes;c__Clostridia;o__Clostridiales;f__Peptostreptococcaceae;g__unidentified_Peptostreptococcaceae;s__unidentified_Peptostreptococcaceae	0.8722361034098397
ASV_1295	d__Bacteria;p__unclassified_Bacteria;c__unclassified_Bacteria;o__unclassified_Bacteria;f__unclassified_Bacteria;g__unclassified_Bacteria;s__unclassified_Bacteria	0.9999999999996156
ASV_1296	d__Bacteria;p__Bacteroidetes;c__Bacteroidia;o__Bacteroidales;f__Prevotellaceae;g__Prevotella;s__Prevotella_stercorea	0.8947452579280158
ASV_1297	d__Bacteria;p__Tenericutes;c__Mollicutes;o__RF39;f__unidentified_RF39;g__unidentified_RF39;s__unidentified_RF39	0.9999999217479316
ASV_1298	d__Bacteria;p__Proteobacteria;c__Alphaproteobacteria;o__unclassified_Alphaproteobacteria;f__unclassified_Alphaproteobacteria;g__unclassified_Alphaproteobacteria;s__unclassified_Alphaproteobacteria	0.9956331162688452
ASV_1299	d__Bacteria;p__Firmicutes;c__Clostridia;o__Clostridiales;f__Ruminococcaceae;g__unidentified_Ruminococcaceae;s__unidentified_Ruminococcaceae	0.9858946109909824
ASV_1300	d__Bacteria;p__Proteobacteria;c__Alphaproteobacteria;o__Rhodospirillales;f__Rhodospirillaceae;g__unidentified_Rhodospirillaceae;s__unidentified_Rhodospirillaceae	0.9898162814675641
ASV_1301	d__Bacteria;p__Bacteroidetes;c__Bacteroidia;o__Bacteroidales;f__unidentified_Bacteroidales;g__unidentified_Bacteroidales;s__unidentified_Bacteroidales	0.8546635393271307
ASV_1302	d__Bacteria;p__unidentified_Bacteria;c__unidentified_Bacteria;o__unidentified_Bacteria;f__unidentified_Bacteria;g__unidentified_Bacteria;s__unidentified_Bacteria	0.8799454957910476
ASV_1303	d__Bacteria;p__Firmicutes;c__Bacilli;o__Lactobacillales;f__Lactobacillaceae;g__Lactobacillus;s__unidentified_Lactobacillus	0.7407370295116424
ASV_1304	d__Bacteria;p__Firmicutes;c__Clostridia;o__Clostridiales;f__Peptococcaceae;g__unidentified_Peptococcaceae;s__unidentified_Peptococcaceae	0.999850526078284
ASV_1305	d__Bacteria;p__Acidobacteria;c__Acidobacteria-6;o__iii1-15;f__unidentified_iii1-15;g__unidentified_iii1-15;s__unidentified_iii1-15	0.919588236848429
ASV_1306	d__Bacteria;p__Firmicutes;c__unclassified_Firmicutes;o__unclassified_Firmicutes;f__unclassified_Firmicutes;g__unclassified_Firmicutes;s__unclassified_Firmicutes	0.997365161847922
ASV_1307	d__Bacteria;p__Firmicutes;c__Clostridia;o__Clostridiales;f__unidentified_Clostridiales;g__unidentified_Clostridiales;s__unidentified_Clostridiales	0.998930354329621
ASV_1308	d__Bacteria;p__Firmicutes;c__Clostridia;o__Clostridiales;f__Lachnospiraceae;g__unidentified_Lachnospiraceae;s__unidentified_Lachnospiraceae	0.8566018129604311
ASV_1309	d__Bacteria;p__Proteobacteria;c__Alphaproteobacteria;o__Ellin329;f__unidentified_Ellin329;g__unidentified_Ellin329;s__unidentified_Ellin329	0.8888314956076592
ASV_1310	d__Bacteria;p__Firmicutes;c__Clostridia;o__Clostridiales;f__Clostridiaceae;g__Clostridium;s__Clostridium_colicanis	0.8675643470432562
ASV_1311	d__Bacteria;p__Firmicutes;c__Clostridia;o__Clostridiales;f__Ruminococcaceae;g__Ruminococcus;s__unidentified_Ruminococcus	0.9999622630487655
ASV_1312	d__Bacteria;p__Firmicutes;c__Clostridia;o__Clostridiales;f__unidentified_Clostridiales;g__unidentified_Clostridiales;s__unidentified_Clostridiales	0.848598332481548
ASV_1313	d__Bacteria;p__Firmicutes;c__Clostridia;o__Clostridiales;f__[Mogibacteriaceae];g__unidentified_[Mogibacteriaceae];s__unidentified_[Mogibacteriaceae]	0.9964606671194794
ASV_1314	d__Bacteria;p__Firmicutes;c__Clostridia;o__Clostridiales;f__Clostridiaceae;g__Clostridium;s__unidentified_Clostridium	0.7443587145860463
ASV_1315	d__Bacteria;p__Firmicutes;c__Bacilli;o__Lactobacillales;f__Lactobacillaceae;g__Pediococcus;s__unclassified_Pediococcus	0.978733106409702
ASV_1316	d__Bacteria;p__unidentified_Bacteria;c__unidentified_Bacteria;o__unidentified_Bacteria;f__unidentified_Bacteria;g__unidentified_Bacteria;s__unidentified_Bacteria	0.9266674326706746
ASV_1317	d__Bacteria;p__Bacteroidetes;c__Bacteroidia;o__Bacteroidales;f__S24-7;g__unidentified_S24-7;s__unidentified_S24-7	0.9989660168253098
ASV_1318	d__Bacteria;p__Firmicutes;c__Clostridia;o__Clostridiales;f__unidentified_Clostridiales;g__unidentified_Clostridiales;s__unidentified_Clostridiales	0.9897372002884371
ASV_1319	d__Bacteria;p__Proteobacteria;c__Alphaproteobacteria;o__Sphingomonadales;f__Sphingomonadaceae;g__Sphingomonas;s__unclassified_Sphingomonas	0.85229920719412
ASV_1320	d__Bacteria;p__Actinobacteria;c__Actinobacteria;o__Actinomycetales;f__unclassified_Actinomycetales;g__unclassified_Actinomycetales;s__unclassified_Actinomycetales	0.9808034581442626
ASV_1321	d__Bacteria;p__Firmicutes;c__Clostridia;o__Clostridiales;f__unidentified_Clostridiales;g__unidentified_Clostridiales;s__unidentified_Clostridiales	0.9559368352771183
ASV_1322	d__Bacteria;p__Actinobacteria;c__Acidimicrobiia;o__Acidimicrobiales;f__C111;g__unidentified_C111;s__unidentified_C111	0.9709505105561285
ASV_1323	d__Bacteria;p__Firmicutes;c__Clostridia;o__Clostridiales;f__unidentified_Clostridiales;g__unidentified_Clostridiales;s__unidentified_Clostridiales	0.9207949471375865
ASV_1324	d__Bacteria;p__Firmicutes;c__Bacilli;o__Bacillales;f__unclassified_Bacillales;g__unclassified_Bacillales;s__unclassified_Bacillales	0.992496437881276
ASV_1325	d__Bacteria;p__Bacteroidetes;c__Bacteroidia;o__Bacteroidales;f__S24-7;g__unidentified_S24-7;s__unidentified_S24-7	0.9999956368526712
ASV_1326	d__Bacteria;p__Proteobacteria;c__Alphaproteobacteria;o__Sphingomonadales;f__Sphingomonadaceae;g__Kaistobacter;s__unidentified_Kaistobacter	0.9470820104223467
ASV_1327	d__Bacteria;p__Actinobacteria;c__Actinobacteria;o__Actinomycetales;f__Micrococcaceae;g__Rothia;s__Rothia_nasimurium	0.958816980619492
ASV_1328	d__Bacteria;p__Bacteroidetes;c__Bacteroidia;o__Bacteroidales;f__unidentified_Bacteroidales;g__unidentified_Bacteroidales;s__unidentified_Bacteroidales	0.9279156281287211
ASV_1329	d__Bacteria;p__Bacteroidetes;c__Bacteroidia;o__Bacteroidales;f__S24-7;g__unidentified_S24-7;s__unidentified_S24-7	0.9999929952132106
ASV_1330	d__Bacteria;p__Proteobacteria;c__Alphaproteobacteria;o__unclassified_Alphaproteobacteria;f__unclassified_Alphaproteobacteria;g__unclassified_Alphaproteobacteria;s__unclassified_Alphaproteobacteria	0.9975099731537089
ASV_1331	d__Bacteria;p__Tenericutes;c__Mollicutes;o__Anaeroplasmatales;f__Anaeroplasmataceae;g__Anaeroplasma;s__unidentified_Anaeroplasma	0.9966593691323755
ASV_1332	d__Bacteria;p__Firmicutes;c__Clostridia;o__Clostridiales;f__Veillonellaceae;g__Phascolarctobacterium;s__unidentified_Phascolarctobacterium	0.999999996342865
ASV_1333	d__Bacteria;p__Proteobacteria;c__Alphaproteobacteria;o__Rhizobiales;f__unidentified_Rhizobiales;g__unidentified_Rhizobiales;s__unidentified_Rhizobiales	0.7516046299206884
ASV_1334	d__Bacteria;p__Firmicutes;c__Bacilli;o__Lactobacillales;f__Lactobacillaceae;g__unclassified_Lactobacillaceae;s__unclassified_Lactobacillaceae	0.9974740464348034
ASV_1335	d__Bacteria;p__Bacteroidetes;c__Bacteroidia;o__Bacteroidales;f__Bacteroidaceae;g__Bacteroides;s__unclassified_Bacteroides	0.999999998287344
ASV_1336	d__Bacteria;p__Firmicutes;c__Clostridia;o__Clostridiales;f__Ruminococcaceae;g__unclassified_Ruminococcaceae;s__unclassified_Ruminococcaceae	0.999498238503017
ASV_1337	d__Bacteria;p__unclassified_Bacteria;c__unclassified_Bacteria;o__unclassified_Bacteria;f__unclassified_Bacteria;g__unclassified_Bacteria;s__unclassified_Bacteria	0.999999999999682
ASV_1338	d__Bacteria;p__Firmicutes;c__Clostridia;o__Clostridiales;f__unclassified_Clostridiales;g__unclassified_Clostridiales;s__unclassified_Clostridiales	0.9999109832468406
ASV_1339	d__Bacteria;p__Firmicutes;c__Clostridia;o__Clostridiales;f__Lachnospiraceae;g__unidentified_Lachnospiraceae;s__unidentified_Lachnospiraceae	0.7247337945896606
ASV_1340	d__Bacteria;p__Firmicutes;c__Clostridia;o__Clostridiales;f__Clostridiaceae;g__Clostridium;s__unidentified_Clostridium	0.9946241344709175
ASV_1341	d__Bacteria;p__Firmicutes;c__Clostridia;o__Clostridiales;f__unidentified_Clostridiales;g__unidentified_Clostridiales;s__unidentified_Clostridiales	0.7908216211014089
ASV_1342	d__Bacteria;p__unidentified_Bacteria;c__unidentified_Bacteria;o__unidentified_Bacteria;f__unidentified_Bacteria;g__unidentified_Bacteria;s__unidentified_Bacteria	0.9557441446348853
ASV_1343	d__Bacteria;p__Proteobacteria;c__Alphaproteobacteria;o__Rhodospirillales;f__Rhodospirillaceae;g__unidentified_Rhodospirillaceae;s__unidentified_Rhodospirillaceae	0.985142145612133
ASV_1344	d__Bacteria;p__Firmicutes;c__Clostridia;o__Clostridiales;f__unidentified_Clostridiales;g__unidentified_Clostridiales;s__unidentified_Clostridiales	0.9430814989449017
ASV_1345	d__Bacteria;p__Tenericutes;c__Mollicutes;o__RF39;f__unidentified_RF39;g__unidentified_RF39;s__unidentified_RF39	0.9999999970042381
ASV_1346	d__Bacteria;p__Proteobacteria;c__Betaproteobacteria;o__Burkholderiales;f__Comamonadaceae;g__unclassified_Comamonadaceae;s__unclassified_Comamonadaceae	0.9979336988045671
ASV_1347	d__Bacteria;p__Firmicutes;c__Clostridia;o__Clostridiales;f__Ruminococcaceae;g__Oscillospira;s__unidentified_Oscillospira	0.9974563991147425
ASV_1348	d__Bacteria;p__Proteobacteria;c__Gammaproteobacteria;o__Pseudomonadales;f__Moraxellaceae;g__Acinetobacter;s__unclassified_Acinetobacter	0.7932424171933132
ASV_1349	d__Bacteria;p__Firmicutes;c__Bacilli;o__Bacillales;f__Planococcaceae;g__Sporosarcina;s__Sporosarcina_aquimarina	0.903555196247395
ASV_1350	d__Bacteria;p__Firmicutes;c__Bacilli;o__Bacillales;f__unclassified_Bacillales;g__unclassified_Bacillales;s__unclassified_Bacillales	0.8657931746553523
ASV_1351	d__Bacteria;p__Proteobacteria;c__Gammaproteobacteria;o__Enterobacteriales;f__Enterobacteriaceae;g__unclassified_Enterobacteriaceae;s__unclassified_Enterobacteriaceae	0.9994386064423232
ASV_1352	d__Bacteria;p__Proteobacteria;c__Gammaproteobacteria;o__Legionellales;f__Legionellaceae;g__Legionella;s__unidentified_Legionella	0.718682274749491
ASV_1353	d__Bacteria;p__Firmicutes;c__Clostridia;o__Clostridiales;f__Lachnospiraceae;g__Coprococcus;s__unidentified_Coprococcus	0.995232092607983
ASV_1354	d__Bacteria;p__Proteobacteria;c__Alphaproteobacteria;o__Ellin329;f__unidentified_Ellin329;g__unidentified_Ellin329;s__unidentified_Ellin329	0.9999999007619969
ASV_1355	d__Bacteria;p__Gemmatimonadetes;c__Gemmatimonadetes;o__unidentified_Gemmatimonadetes;f__unidentified_Gemmatimonadetes;g__unidentified_Gemmatimonadetes;s__unidentified_Gemmatimonadetes	0.9874675122651477
ASV_1356	d__Bacteria;p__Firmicutes;c__Clostridia;o__Clostridiales;f__unidentified_Clostridiales;g__unidentified_Clostridiales;s__unidentified_Clostridiales	0.9999003476421375
ASV_1357	d__Bacteria;p__Firmicutes;c__Clostridia;o__Clostridiales;f__unidentified_Clostridiales;g__unidentified_Clostridiales;s__unidentified_Clostridiales	0.979161444065932
ASV_1358	d__Bacteria;p__Firmicutes;c__Clostridia;o__Clostridiales;f__Peptococcaceae;g__unidentified_Peptococcaceae;s__unidentified_Peptococcaceae	0.9998795780204189
ASV_1359	d__Bacteria;p__Firmicutes;c__Clostridia;o__Clostridiales;f__unidentified_Clostridiales;g__unidentified_Clostridiales;s__unidentified_Clostridiales	0.7857039705366735
ASV_1360	d__Bacteria;p__Firmicutes;c__Clostridia;o__Clostridiales;f__Ruminococcaceae;g__Ruminococcus;s__Ruminococcus_callidus	0.9744414559282374
ASV_1361	d__Bacteria;p__Firmicutes;c__Bacilli;o__Gemellales;f__Gemellaceae;g__Gemella;s__unidentified_Gemella	0.9492768531988767
ASV_1362	d__Bacteria;p__Firmicutes;c__Clostridia;o__Clostridiales;f__Clostridiaceae;g__unclassified_Clostridiaceae;s__unclassified_Clostridiaceae	0.9998384395286638
ASV_1363	d__Bacteria;p__OP8;c__OP8_1;o__unidentified_OP8_1;f__unidentified_OP8_1;g__unidentified_OP8_1;s__unidentified_OP8_1	0.9921664830511072
ASV_1364	d__Bacteria;p__Firmicutes;c__Clostridia;o__Clostridiales;f__Dehalobacteriaceae;g__Dehalobacterium;s__unidentified_Dehalobacterium	0.9999985916653285
ASV_1365	d__Bacteria;p__Tenericutes;c__Mollicutes;o__RF39;f__unidentified_RF39;g__unidentified_RF39;s__unidentified_RF39	0.9999999975925391
ASV_1366	d__Bacteria;p__Actinobacteria;c__Actinobacteria;o__Actinomycetales;f__Microbacteriaceae;g__unclassified_Microbacteriaceae;s__unclassified_Microbacteriaceae	0.9736748377609867
ASV_1367	d__Bacteria;p__Proteobacteria;c__Betaproteobacteria;o__unidentified_Betaproteobacteria;f__unidentified_Betaproteobacteria;g__unidentified_Betaproteobacteria;s__unidentified_Betaproteobacteria	0.9993671884841895
ASV_1368	d__Bacteria;p__Firmicutes;c__Clostridia;o__Clostridiales;f__[Mogibacteriaceae];g__unidentified_[Mogibacteriaceae];s__unidentified_[Mogibacteriaceae]	0.9997745876317272
ASV_1369	d__Bacteria;p__Firmicutes;c__Clostridia;o__Clostridiales;f__Lachnospiraceae;g__unidentified_Lachnospiraceae;s__unidentified_Lachnospiraceae	0.8972774917519285
ASV_1370	d__Bacteria;p__Firmicutes;c__Clostridia;o__Clostridiales;f__Lachnospiraceae;g__unidentified_Lachnospiraceae;s__unidentified_Lachnospiraceae	0.8750421503612728
ASV_1371	d__Bacteria;p__Firmicutes;c__Clostridia;o__Clostridiales;f__Ruminococcaceae;g__Oscillospira;s__unidentified_Oscillospira	0.8712456836817353
ASV_1372	d__Bacteria;p__Firmicutes;c__Clostridia;o__Clostridiales;f__Ruminococcaceae;g__unidentified_Ruminococcaceae;s__unidentified_Ruminococcaceae	0.9954208625287956
ASV_1373	d__Bacteria;p__Proteobacteria;c__Gammaproteobacteria;o__Alteromonadales;f__Alteromonadaceae;g__Marinobacter;s__unidentified_Marinobacter	0.7690913533003848
ASV_1374	d__Bacteria;p__Actinobacteria;c__Actinobacteria;o__Actinomycetales;f__Nocardioidaceae;g__Nocardioides;s__unidentified_Nocardioides	0.8782066524103886
ASV_1375	d__Bacteria;p__Firmicutes;c__Clostridia;o__Clostridiales;f__unidentified_Clostridiales;g__unidentified_Clostridiales;s__unidentified_Clostridiales	0.9433939640228948
ASV_1376	d__Bacteria;p__Proteobacteria;c__Alphaproteobacteria;o__Rhizobiales;f__Beijerinckiaceae;g__unclassified_Beijerinckiaceae;s__unclassified_Beijerinckiaceae	0.9389773365177326
ASV_1377	d__Bacteria;p__Bacteroidetes;c__Bacteroidia;o__Bacteroidales;f__S24-7;g__unidentified_S24-7;s__unidentified_S24-7	0.9999996381802789
ASV_1378	d__Bacteria;p__Firmicutes;c__Bacilli;o__Turicibacterales;f__Turicibacteraceae;g__Turicibacter;s__unidentified_Turicibacter	0.9999999958928072
ASV_1379	d__Bacteria;p__Firmicutes;c__Clostridia;o__Clostridiales;f__unidentified_Clostridiales;g__unidentified_Clostridiales;s__unidentified_Clostridiales	0.9176384026427662
ASV_1380	d__Bacteria;p__unidentified_Bacteria;c__unidentified_Bacteria;o__unidentified_Bacteria;f__unidentified_Bacteria;g__unidentified_Bacteria;s__unidentified_Bacteria	0.8025944289049742
ASV_1381	d__Bacteria;p__unclassified_Bacteria;c__unclassified_Bacteria;o__unclassified_Bacteria;f__unclassified_Bacteria;g__unclassified_Bacteria;s__unclassified_Bacteria	0.9999999742309335
ASV_1382	d__Bacteria;p__Firmicutes;c__Clostridia;o__Clostridiales;f__Ruminococcaceae;g__unidentified_Ruminococcaceae;s__unidentified_Ruminococcaceae	0.9110530488650974
ASV_1383	d__Bacteria;p__Firmicutes;c__Clostridia;o__Clostridiales;f__Lachnospiraceae;g__unclassified_Lachnospiraceae;s__unclassified_Lachnospiraceae	0.9617331214515021
ASV_1384	d__Bacteria;p__Firmicutes;c__unclassified_Firmicutes;o__unclassified_Firmicutes;f__unclassified_Firmicutes;g__unclassified_Firmicutes;s__unclassified_Firmicutes	0.8326008341746125
ASV_1385	d__Bacteria;p__Firmicutes;c__Clostridia;o__Clostridiales;f__Lachnospiraceae;g__unidentified_Lachnospiraceae;s__unidentified_Lachnospiraceae	0.8582710998490055
ASV_1386	d__Bacteria;p__Firmicutes;c__Clostridia;o__Clostridiales;f__Peptostreptococcaceae;g__Clostridium;s__Clostridium_ruminantium	0.8871143106096789
ASV_1387	d__Bacteria;p__Bacteroidetes;c__Bacteroidia;o__Bacteroidales;f__S24-7;g__unidentified_S24-7;s__unidentified_S24-7	0.8627369346357041
ASV_1388	d__Bacteria;p__Firmicutes;c__Clostridia;o__Clostridiales;f__Ruminococcaceae;g__unidentified_Ruminococcaceae;s__unidentified_Ruminococcaceae	0.9984206474268446
ASV_1389	d__Bacteria;p__Firmicutes;c__Clostridia;o__Clostridiales;f__unclassified_Clostridiales;g__unclassified_Clostridiales;s__unclassified_Clostridiales	0.9999995726273659
ASV_1390	d__Bacteria;p__Gemmatimonadetes;c__Gemmatimonadetes;o__unidentified_Gemmatimonadetes;f__unidentified_Gemmatimonadetes;g__unidentified_Gemmatimonadetes;s__unidentified_Gemmatimonadetes	0.9993255779968151
ASV_1391	d__Bacteria;p__Firmicutes;c__Clostridia;o__Clostridiales;f__Ruminococcaceae;g__Oscillospira;s__unidentified_Oscillospira	0.9996895589644598
ASV_1392	d__Bacteria;p__Proteobacteria;c__Alphaproteobacteria;o__Rhodospirillales;f__Rhodospirillaceae;g__Reyranella;s__Reyranella_massiliensis	0.9402273721768775
ASV_1393	d__Bacteria;p__Firmicutes;c__Bacilli;o__Lactobacillales;f__Lactobacillaceae;g__Lactobacillus;s__unidentified_Lactobacillus	0.7922947630596535
ASV_1394	d__Bacteria;p__Spirochaetes;c__Spirochaetes;o__Spirochaetales;f__Spirochaetaceae;g__Treponema;s__unidentified_Treponema	0.9999997583813077
ASV_1395	d__Bacteria;p__Proteobacteria;c__Gammaproteobacteria;o__Xanthomonadales;f__Xanthomonadaceae;g__unclassified_Xanthomonadaceae;s__unclassified_Xanthomonadaceae	0.9065432833136141
ASV_1396	d__Bacteria;p__Proteobacteria;c__Alphaproteobacteria;o__unidentified_Alphaproteobacteria;f__unidentified_Alphaproteobacteria;g__unidentified_Alphaproteobacteria;s__unidentified_Alphaproteobacteria	0.8053631099308132
ASV_1397	d__Bacteria;p__Firmicutes;c__Clostridia;o__Clostridiales;f__unidentified_Clostridiales;g__unidentified_Clostridiales;s__unidentified_Clostridiales	0.9999763281440452
ASV_1398	d__Bacteria;p__WPS-2;c__unidentified_WPS-2;o__unidentified_WPS-2;f__unidentified_WPS-2;g__unidentified_WPS-2;s__unidentified_WPS-2	0.9999999642135158
ASV_1399	d__Bacteria;p__Firmicutes;c__Clostridia;o__Clostridiales;f__Lachnospiraceae;g__[Ruminococcus];s__[Ruminococcus]_gnavus	0.901506310413137
ASV_1400	d__Bacteria;p__Proteobacteria;c__Alphaproteobacteria;o__Rhodobacterales;f__Rhodobacteraceae;g__Paracoccus;s__unclassified_Paracoccus	0.9858477360998513
ASV_1401	d__Bacteria;p__Firmicutes;c__Clostridia;o__Clostridiales;f__unidentified_Clostridiales;g__unidentified_Clostridiales;s__unidentified_Clostridiales	0.8394401082108084
ASV_1402	d__Bacteria;p__Firmicutes;c__Clostridia;o__Clostridiales;f__unidentified_Clostridiales;g__unidentified_Clostridiales;s__unidentified_Clostridiales	0.7883942167444604
ASV_1403	d__Bacteria;p__Firmicutes;c__Clostridia;o__Clostridiales;f__Ruminococcaceae;g__unidentified_Ruminococcaceae;s__unidentified_Ruminococcaceae	0.9947538693642313
ASV_1404	d__Bacteria;p__Acidobacteria;c__Acidobacteria-6;o__unclassified_Acidobacteria-6;f__unclassified_Acidobacteria-6;g__unclassified_Acidobacteria-6;s__unclassified_Acidobacteria-6	0.9557538095871105
ASV_1405	d__Bacteria;p__Firmicutes;c__Bacilli;o__Lactobacillales;f__Lactobacillaceae;g__Pediococcus;s__unclassified_Pediococcus	0.7213547217704382
ASV_1406	d__Bacteria;p__Bacteroidetes;c__Bacteroidia;o__Bacteroidales;f__S24-7;g__unidentified_S24-7;s__unidentified_S24-7	0.999907684712861
ASV_1407	d__Bacteria;p__Firmicutes;c__Bacilli;o__Bacillales;f__unclassified_Bacillales;g__unclassified_Bacillales;s__unclassified_Bacillales	0.9353068496801642
ASV_1408	d__Bacteria;p__Chloroflexi;c__Ellin6529;o__unidentified_Ellin6529;f__unidentified_Ellin6529;g__unidentified_Ellin6529;s__unidentified_Ellin6529	0.99864595070137
ASV_1409	d__Bacteria;p__Proteobacteria;c__Betaproteobacteria;o__Burkholderiales;f__Comamonadaceae;g__unclassified_Comamonadaceae;s__unclassified_Comamonadaceae	0.9997588645967377
ASV_1410	d__Bacteria;p__Firmicutes;c__Clostridia;o__Clostridiales;f__unidentified_Clostridiales;g__unidentified_Clostridiales;s__unidentified_Clostridiales	0.8766139096311799
ASV_1411	d__Bacteria;p__Firmicutes;c__Clostridia;o__Clostridiales;f__Clostridiaceae;g__Proteiniclasticum;s__unidentified_Proteiniclasticum	0.9999730817304853
ASV_1412	d__Bacteria;p__Firmicutes;c__Clostridia;o__Clostridiales;f__Ruminococcaceae;g__unidentified_Ruminococcaceae;s__unidentified_Ruminococcaceae	0.9865332974470942
ASV_1413	d__Bacteria;p__Bacteroidetes;c__[Saprospirae];o__[Saprospirales];f__Chitinophagaceae;g__unidentified_Chitinophagaceae;s__unidentified_Chitinophagaceae	0.9981216633258946
ASV_1414	d__Bacteria;p__Actinobacteria;c__Actinobacteria;o__Actinomycetales;f__Thermomonosporaceae;g__Actinoallomurus;s__unidentified_Actinoallomurus	0.7361157754991449
ASV_1415	d__Bacteria;p__Firmicutes;c__Clostridia;o__Clostridiales;f__Lachnospiraceae;g__unidentified_Lachnospiraceae;s__unidentified_Lachnospiraceae	0.9589290239032677
ASV_1416	d__Bacteria;p__Bacteroidetes;c__Bacteroidia;o__Bacteroidales;f__S24-7;g__unidentified_S24-7;s__unidentified_S24-7	0.9999595504930725
ASV_1417	d__Bacteria;p__Proteobacteria;c__Betaproteobacteria;o__Burkholderiales;f__Comamonadaceae;g__unclassified_Comamonadaceae;s__unclassified_Comamonadaceae	0.9998241878851677
ASV_1418	d__Bacteria;p__Bacteroidetes;c__Bacteroidia;o__Bacteroidales;f__Bacteroidaceae;g__Bacteroides;s__unidentified_Bacteroides	0.9846625359435475
ASV_1419	d__Bacteria;p__Bacteroidetes;c__Bacteroidia;o__Bacteroidales;f__Rikenellaceae;g__unidentified_Rikenellaceae;s__unidentified_Rikenellaceae	0.8287126055660446
ASV_1420	d__Bacteria;p__Firmicutes;c__Clostridia;o__Clostridiales;f__unidentified_Clostridiales;g__unidentified_Clostridiales;s__unidentified_Clostridiales	0.753455696204247
ASV_1421	d__Bacteria;p__Proteobacteria;c__Deltaproteobacteria;o__Myxococcales;f__Haliangiaceae;g__unidentified_Haliangiaceae;s__unidentified_Haliangiaceae	0.9949159407578207
ASV_1422	d__Bacteria;p__Actinobacteria;c__Actinobacteria;o__Actinomycetales;f__Micromonosporaceae;g__unclassified_Micromonosporaceae;s__unclassified_Micromonosporaceae	0.7603397573150215
ASV_1423	d__Bacteria;p__Bacteroidetes;c__Bacteroidia;o__Bacteroidales;f__S24-7;g__unidentified_S24-7;s__unidentified_S24-7	0.9829951840368598
ASV_1424	d__Bacteria;p__Bacteroidetes;c__Bacteroidia;o__Bacteroidales;f__Porphyromonadaceae;g__Parabacteroides;s__unidentified_Parabacteroides	0.8964260164470433
ASV_1425	d__Bacteria;p__Firmicutes;c__Clostridia;o__Clostridiales;f__unidentified_Clostridiales;g__unidentified_Clostridiales;s__unidentified_Clostridiales	0.893148485552737
ASV_1426	d__Bacteria;p__unidentified_Bacteria;c__unidentified_Bacteria;o__unidentified_Bacteria;f__unidentified_Bacteria;g__unidentified_Bacteria;s__unidentified_Bacteria	0.8525293153882619
ASV_1427	d__Bacteria;p__Acidobacteria;c__Acidobacteriia;o__Acidobacteriales;f__Koribacteraceae;g__unidentified_Koribacteraceae;s__unidentified_Koribacteraceae	0.9999980253236799
ASV_1428	d__Bacteria;p__Acidobacteria;c__Solibacteres;o__Solibacterales;f__unidentified_Solibacterales;g__unidentified_Solibacterales;s__unidentified_Solibacterales	0.9927490269872237
ASV_1429	d__Bacteria;p__Actinobacteria;c__Acidimicrobiia;o__Acidimicrobiales;f__EB1017;g__unidentified_EB1017;s__unidentified_EB1017	0.9999947393588074
ASV_1430	d__Bacteria;p__Actinobacteria;c__Actinobacteria;o__Actinomycetales;f__Microbacteriaceae;g__unclassified_Microbacteriaceae;s__unclassified_Microbacteriaceae	0.9999180192981413
ASV_1431	d__Bacteria;p__Firmicutes;c__Clostridia;o__Clostridiales;f__[Mogibacteriaceae];g__unidentified_[Mogibacteriaceae];s__unidentified_[Mogibacteriaceae]	0.9999928824859753
ASV_1432	d__Bacteria;p__Firmicutes;c__Clostridia;o__Clostridiales;f__unidentified_Clostridiales;g__unidentified_Clostridiales;s__unidentified_Clostridiales	0.9724311017671737
ASV_1433	d__Bacteria;p__Bacteroidetes;c__Bacteroidia;o__Bacteroidales;f__S24-7;g__unidentified_S24-7;s__unidentified_S24-7	0.9999999346097489
ASV_1434	d__Bacteria;p__Actinobacteria;c__Coriobacteriia;o__Coriobacteriales;f__Coriobacteriaceae;g__Adlercreutzia;s__unidentified_Adlercreutzia	0.9899121253507003
ASV_1435	d__Bacteria;p__Firmicutes;c__Clostridia;o__Clostridiales;f__Ruminococcaceae;g__Oscillospira;s__unidentified_Oscillospira	0.9990252707835394
ASV_1436	d__Bacteria;p__Firmicutes;c__Clostridia;o__Clostridiales;f__unidentified_Clostridiales;g__unidentified_Clostridiales;s__unidentified_Clostridiales	0.9998488805849376
ASV_1437	d__Bacteria;p__Bacteroidetes;c__Bacteroidia;o__Bacteroidales;f__unclassified_Bacteroidales;g__unclassified_Bacteroidales;s__unclassified_Bacteroidales	0.9975746937385415
ASV_1438	d__Bacteria;p__Proteobacteria;c__Betaproteobacteria;o__Burkholderiales;f__Comamonadaceae;g__unclassified_Comamonadaceae;s__unclassified_Comamonadaceae	0.9985844810714364
ASV_1439	d__Bacteria;p__Proteobacteria;c__Gammaproteobacteria;o__Thiotrichales;f__Piscirickettsiaceae;g__unidentified_Piscirickettsiaceae;s__unidentified_Piscirickettsiaceae	0.9879725122897796
ASV_1440	d__Bacteria;p__Firmicutes;c__Clostridia;o__Clostridiales;f__Ruminococcaceae;g__unidentified_Ruminococcaceae;s__unidentified_Ruminococcaceae	0.9986229883151472
ASV_1441	d__Bacteria;p__Proteobacteria;c__Alphaproteobacteria;o__Sphingomonadales;f__Sphingomonadaceae;g__Novosphingobium;s__Novosphingobium_acidiphilum	0.9437354875701347
ASV_1442	d__Bacteria;p__Bacteroidetes;c__Bacteroidia;o__Bacteroidales;f__[Odoribacteraceae];g__Butyricimonas;s__unidentified_Butyricimonas	0.7377095181973987
ASV_1443	d__Bacteria;p__Proteobacteria;c__Alphaproteobacteria;o__unidentified_Alphaproteobacteria;f__unidentified_Alphaproteobacteria;g__unidentified_Alphaproteobacteria;s__unidentified_Alphaproteobacteria	0.7751411078450515
ASV_1444	d__Bacteria;p__Firmicutes;c__Clostridia;o__Clostridiales;f__Ruminococcaceae;g__Oscillospira;s__unidentified_Oscillospira	0.9760768342399939
ASV_1445	d__Bacteria;p__Firmicutes;c__Clostridia;o__Clostridiales;f__unclassified_Clostridiales;g__unclassified_Clostridiales;s__unclassified_Clostridiales	0.9999999990063828
ASV_1446	d__Bacteria;p__Firmicutes;c__Clostridia;o__Clostridiales;f__Ruminococcaceae;g__Oscillospira;s__unidentified_Oscillospira	0.9943936472725922
ASV_1447	d__Bacteria;p__unclassified_Bacteria;c__unclassified_Bacteria;o__unclassified_Bacteria;f__unclassified_Bacteria;g__unclassified_Bacteria;s__unclassified_Bacteria	0.9999999999959639
ASV_1448	d__Bacteria;p__Firmicutes;c__Bacilli;o__Bacillales;f__unidentified_Bacillales;g__unidentified_Bacillales;s__unidentified_Bacillales	0.9405179391661519
ASV_1449	d__Bacteria;p__Firmicutes;c__Clostridia;o__Clostridiales;f__Ruminococcaceae;g__unidentified_Ruminococcaceae;s__unidentified_Ruminococcaceae	0.9628633426248776
ASV_1450	d__Bacteria;p__Proteobacteria;c__Alphaproteobacteria;o__Rhodospirillales;f__Rhodospirillaceae;g__unidentified_Rhodospirillaceae;s__unidentified_Rhodospirillaceae	0.8913867769922162
ASV_1451	d__Bacteria;p__Bacteroidetes;c__Bacteroidia;o__Bacteroidales;f__S24-7;g__unidentified_S24-7;s__unidentified_S24-7	0.9986249628685363
ASV_1452	d__Bacteria;p__Firmicutes;c__Bacilli;o__Turicibacterales;f__Turicibacteraceae;g__Turicibacter;s__unidentified_Turicibacter	0.9999994321508061
ASV_1453	d__Bacteria;p__Proteobacteria;c__Alphaproteobacteria;o__unclassified_Alphaproteobacteria;f__unclassified_Alphaproteobacteria;g__unclassified_Alphaproteobacteria;s__unclassified_Alphaproteobacteria	0.9910052041054425
ASV_1454	d__Bacteria;p__Firmicutes;c__Clostridia;o__Clostridiales;f__Lachnospiraceae;g__unclassified_Lachnospiraceae;s__unclassified_Lachnospiraceae	0.9806257519922081
ASV_1455	d__Bacteria;p__Firmicutes;c__Clostridia;o__Clostridiales;f__Ruminococcaceae;g__unclassified_Ruminococcaceae;s__unclassified_Ruminococcaceae	0.9990283395400996
ASV_1456	d__Bacteria;p__Proteobacteria;c__Gammaproteobacteria;o__Enterobacteriales;f__Enterobacteriaceae;g__Shigella;s__unclassified_Shigella	0.8280394569943187
ASV_1457	d__Bacteria;p__Bacteroidetes;c__Bacteroidia;o__Bacteroidales;f__unclassified_Bacteroidales;g__unclassified_Bacteroidales;s__unclassified_Bacteroidales	0.7127596700007093
ASV_1458	d__Bacteria;p__Proteobacteria;c__Betaproteobacteria;o__Burkholderiales;f__Comamonadaceae;g__unclassified_Comamonadaceae;s__unclassified_Comamonadaceae	0.998855346920972
ASV_1459	d__Bacteria;p__Firmicutes;c__Clostridia;o__Clostridiales;f__Peptostreptococcaceae;g__unclassified_Peptostreptococcaceae;s__unclassified_Peptostreptococcaceae	0.9959713522156335
ASV_1460	d__Bacteria;p__Actinobacteria;c__Actinobacteria;o__Actinomycetales;f__Streptomycetaceae;g__Streptomyces;s__unclassified_Streptomyces	0.9627055017494228
ASV_1461	d__Bacteria;p__Firmicutes;c__Clostridia;o__Clostridiales;f__Lachnospiraceae;g__Roseburia;s__unclassified_Roseburia	0.9945244651942355
ASV_1462	d__Bacteria;p__Firmicutes;c__Clostridia;o__Clostridiales;f__Ruminococcaceae;g__unidentified_Ruminococcaceae;s__unidentified_Ruminococcaceae	0.9066137929053935
ASV_1463	d__Bacteria;p__Firmicutes;c__Clostridia;o__Clostridiales;f__Ruminococcaceae;g__unidentified_Ruminococcaceae;s__unidentified_Ruminococcaceae	0.9583500587084695
ASV_1464	d__Bacteria;p__Firmicutes;c__Bacilli;o__Lactobacillales;f__Lactobacillaceae;g__Lactobacillus;s__Lactobacillus_vaginalis	0.8159673974725319
ASV_1465	d__Bacteria;p__Actinobacteria;c__Actinobacteria;o__Actinomycetales;f__unclassified_Actinomycetales;g__unclassified_Actinomycetales;s__unclassified_Actinomycetales	0.9999999649623146
ASV_1466	d__Bacteria;p__Proteobacteria;c__Gammaproteobacteria;o__Pseudomonadales;f__Pseudomonadaceae;g__Pseudomonas;s__unclassified_Pseudomonas	0.973086904791061
ASV_1467	d__Bacteria;p__Firmicutes;c__Clostridia;o__Clostridiales;f__Clostridiaceae;g__Clostridium;s__Clostridium_disporicum	0.7709341102725223
ASV_1468	d__Bacteria;p__Firmicutes;c__Clostridia;o__Clostridiales;f__Ruminococcaceae;g__unidentified_Ruminococcaceae;s__unidentified_Ruminococcaceae	0.9991942022586878
ASV_1469	d__Bacteria;p__Firmicutes;c__Clostridia;o__Clostridiales;f__Lachnospiraceae;g__unclassified_Lachnospiraceae;s__unclassified_Lachnospiraceae	0.9858651570551927
ASV_1470	d__Bacteria;p__Proteobacteria;c__Gammaproteobacteria;o__Pseudomonadales;f__Moraxellaceae;g__Acinetobacter;s__unidentified_Acinetobacter	0.7741686990315924
ASV_1471	d__Bacteria;p__Actinobacteria;c__Thermoleophilia;o__Gaiellales;f__Gaiellaceae;g__unidentified_Gaiellaceae;s__unidentified_Gaiellaceae	0.8020252769125861
ASV_1472	d__Bacteria;p__Bacteroidetes;c__Bacteroidia;o__Bacteroidales;f__Porphyromonadaceae;g__Parabacteroides;s__unidentified_Parabacteroides	0.9998378339454725
ASV_1473	d__Bacteria;p__Bacteroidetes;c__Bacteroidia;o__Bacteroidales;f__Prevotellaceae;g__Prevotella;s__unidentified_Prevotella	0.9921408826758612
ASV_1474	d__Bacteria;p__Actinobacteria;c__Actinobacteria;o__Actinomycetales;f__Microbacteriaceae;g__unclassified_Microbacteriaceae;s__unclassified_Microbacteriaceae	0.8643047818745097
ASV_1475	d__Bacteria;p__Bacteroidetes;c__[Saprospirae];o__[Saprospirales];f__unidentified_[Saprospirales];g__unidentified_[Saprospirales];s__unidentified_[Saprospirales]	0.7373835183033016
ASV_1476	d__Bacteria;p__Acidobacteria;c__Acidobacteria-6;o__unidentified_Acidobacteria-6;f__unidentified_Acidobacteria-6;g__unidentified_Acidobacteria-6;s__unidentified_Acidobacteria-6	0.7845462761341896
ASV_1477	d__Bacteria;p__Bacteroidetes;c__[Saprospirae];o__[Saprospirales];f__Chitinophagaceae;g__Flavisolibacter;s__unidentified_Flavisolibacter	0.9995222191156005
ASV_1478	d__Bacteria;p__Firmicutes;c__Clostridia;o__Clostridiales;f__Ruminococcaceae;g__unidentified_Ruminococcaceae;s__unidentified_Ruminococcaceae	0.9975811189860035
ASV_1479	d__Bacteria;p__Bacteroidetes;c__Bacteroidia;o__Bacteroidales;f__Prevotellaceae;g__unclassified_Prevotellaceae;s__unclassified_Prevotellaceae	0.8515189991119935
ASV_1480	d__Bacteria;p__Firmicutes;c__Clostridia;o__Clostridiales;f__Ruminococcaceae;g__unidentified_Ruminococcaceae;s__unidentified_Ruminococcaceae	0.987056587050169
ASV_1481	d__Bacteria;p__Firmicutes;c__Clostridia;o__Clostridiales;f__Lachnospiraceae;g__Blautia;s__Blautia_producta	0.995533663834323
ASV_1482	d__Bacteria;p__Actinobacteria;c__Thermoleophilia;o__Solirubrobacterales;f__Conexibacteraceae;g__unidentified_Conexibacteraceae;s__unidentified_Conexibacteraceae	0.971587195899491
ASV_1483	d__Bacteria;p__Proteobacteria;c__Gammaproteobacteria;o__Enterobacteriales;f__Enterobacteriaceae;g__unclassified_Enterobacteriaceae;s__unclassified_Enterobacteriaceae	0.9992900672063646
ASV_1484	d__Bacteria;p__Gemmatimonadetes;c__Gemmatimonadetes;o__unclassified_Gemmatimonadetes;f__unclassified_Gemmatimonadetes;g__unclassified_Gemmatimonadetes;s__unclassified_Gemmatimonadetes	0.999798603264247
ASV_1485	d__Bacteria;p__Proteobacteria;c__Alphaproteobacteria;o__unclassified_Alphaproteobacteria;f__unclassified_Alphaproteobacteria;g__unclassified_Alphaproteobacteria;s__unclassified_Alphaproteobacteria	0.9999999235016753
ASV_1486	d__Bacteria;p__unidentified_Bacteria;c__unidentified_Bacteria;o__unidentified_Bacteria;f__unidentified_Bacteria;g__unidentified_Bacteria;s__unidentified_Bacteria	0.9935817974860199
ASV_1487	d__Bacteria;p__Acidobacteria;c__Solibacteres;o__Solibacterales;f__unidentified_Solibacterales;g__unidentified_Solibacterales;s__unidentified_Solibacterales	0.9999713760664427
ASV_1488	d__Bacteria;p__Proteobacteria;c__Betaproteobacteria;o__Burkholderiales;f__Comamonadaceae;g__unclassified_Comamonadaceae;s__unclassified_Comamonadaceae	0.9565732369992549
ASV_1489	d__Bacteria;p__Firmicutes;c__Bacilli;o__Lactobacillales;f__Lactobacillaceae;g__Lactobacillus;s__Lactobacillus_hamsteri	0.8460785880483013
ASV_1490	d__Bacteria;p__Firmicutes;c__Erysipelotrichi;o__Erysipelotrichales;f__Erysipelotrichaceae;g__unidentified_Erysipelotrichaceae;s__unidentified_Erysipelotrichaceae	0.9549368235976113
ASV_1491	d__Bacteria;p__Firmicutes;c__Clostridia;o__Clostridiales;f__unidentified_Clostridiales;g__unidentified_Clostridiales;s__unidentified_Clostridiales	0.9999906401488432
ASV_1492	d__Bacteria;p__unidentified_Bacteria;c__unidentified_Bacteria;o__unidentified_Bacteria;f__unidentified_Bacteria;g__unidentified_Bacteria;s__unidentified_Bacteria	0.7603040224364233
ASV_1493	d__Bacteria;p__Firmicutes;c__Bacilli;o__Lactobacillales;f__Lactobacillaceae;g__Lactobacillus;s__unclassified_Lactobacillus	0.7287084579266627
ASV_1494	d__Bacteria;p__Firmicutes;c__Clostridia;o__Clostridiales;f__unidentified_Clostridiales;g__unidentified_Clostridiales;s__unidentified_Clostridiales	0.9861678427534982
ASV_1495	d__Bacteria;p__Firmicutes;c__Clostridia;o__Clostridiales;f__Lachnospiraceae;g__unclassified_Lachnospiraceae;s__unclassified_Lachnospiraceae	0.9841404006046784
ASV_1496	d__Bacteria;p__unclassified_Bacteria;c__unclassified_Bacteria;o__unclassified_Bacteria;f__unclassified_Bacteria;g__unclassified_Bacteria;s__unclassified_Bacteria	0.9999999999971805
ASV_1497	d__Bacteria;p__Firmicutes;c__Clostridia;o__Clostridiales;f__Lachnospiraceae;g__unidentified_Lachnospiraceae;s__unidentified_Lachnospiraceae	0.9424765848991615
ASV_1498	d__Bacteria;p__Firmicutes;c__Clostridia;o__Clostridiales;f__unidentified_Clostridiales;g__unidentified_Clostridiales;s__unidentified_Clostridiales	0.9906542117074154
ASV_1499	d__Bacteria;p__Proteobacteria;c__Betaproteobacteria;o__Burkholderiales;f__Comamonadaceae;g__Acidovorax;s__unclassified_Acidovorax	0.9911687977957214
ASV_1500	d__Bacteria;p__Acidobacteria;c__Solibacteres;o__Solibacterales;f__unidentified_Solibacterales;g__unidentified_Solibacterales;s__unidentified_Solibacterales	0.9999872892663082
ASV_1501	d__Bacteria;p__Firmicutes;c__Clostridia;o__Clostridiales;f__Lachnospiraceae;g__unclassified_Lachnospiraceae;s__unclassified_Lachnospiraceae	0.80942518716979
ASV_1502	d__Bacteria;p__Firmicutes;c__Clostridia;o__Clostridiales;f__unidentified_Clostridiales;g__unidentified_Clostridiales;s__unidentified_Clostridiales	0.9991537426690009
ASV_1503	d__Bacteria;p__Firmicutes;c__Clostridia;o__Clostridiales;f__Clostridiaceae;g__unidentified_Clostridiaceae;s__unidentified_Clostridiaceae	0.9186847340479106
ASV_1504	d__Bacteria;p__Firmicutes;c__Clostridia;o__Clostridiales;f__unidentified_Clostridiales;g__unidentified_Clostridiales;s__unidentified_Clostridiales	0.9889210536083523
ASV_1505	d__Bacteria;p__Actinobacteria;c__Actinobacteria;o__Actinomycetales;f__Streptosporangiaceae;g__unclassified_Streptosporangiaceae;s__unclassified_Streptosporangiaceae	0.9292824127631875
ASV_1506	d__Bacteria;p__Proteobacteria;c__Gammaproteobacteria;o__Enterobacteriales;f__Enterobacteriaceae;g__unclassified_Enterobacteriaceae;s__unclassified_Enterobacteriaceae	0.866073661156926
ASV_1507	d__Bacteria;p__Elusimicrobia;c__Elusimicrobia;o__Elusimicrobiales;f__unidentified_Elusimicrobiales;g__unidentified_Elusimicrobiales;s__unidentified_Elusimicrobiales	0.9999999999949978
ASV_1508	d__Bacteria;p__Gemmatimonadetes;c__Gemm-3;o__unidentified_Gemm-3;f__unidentified_Gemm-3;g__unidentified_Gemm-3;s__unidentified_Gemm-3	0.9999999592744481
ASV_1509	d__Bacteria;p__unclassified_Bacteria;c__unclassified_Bacteria;o__unclassified_Bacteria;f__unclassified_Bacteria;g__unclassified_Bacteria;s__unclassified_Bacteria	0.9999999999438689
ASV_1510	d__Bacteria;p__Firmicutes;c__Clostridia;o__Clostridiales;f__Ruminococcaceae;g__unidentified_Ruminococcaceae;s__unidentified_Ruminococcaceae	0.9444162689887271
ASV_1511	d__Bacteria;p__Proteobacteria;c__Gammaproteobacteria;o__Enterobacteriales;f__Enterobacteriaceae;g__unclassified_Enterobacteriaceae;s__unclassified_Enterobacteriaceae	0.974622175220223
ASV_1512	d__Bacteria;p__Firmicutes;c__Clostridia;o__Clostridiales;f__Peptostreptococcaceae;g__unclassified_Peptostreptococcaceae;s__unclassified_Peptostreptococcaceae	0.9683436244303588
ASV_1513	d__Bacteria;p__Proteobacteria;c__Alphaproteobacteria;o__Sphingomonadales;f__Sphingomonadaceae;g__Novosphingobium;s__unclassified_Novosphingobium	0.9474621969008703
ASV_1514	d__Bacteria;p__Firmicutes;c__Clostridia;o__Clostridiales;f__unidentified_Clostridiales;g__unidentified_Clostridiales;s__unidentified_Clostridiales	0.9903247577226639
ASV_1515	d__Bacteria;p__Proteobacteria;c__Gammaproteobacteria;o__Enterobacteriales;f__Enterobacteriaceae;g__unclassified_Enterobacteriaceae;s__unclassified_Enterobacteriaceae	0.989061002641896
ASV_1516	d__Bacteria;p__Chloroflexi;c__Ellin6529;o__unidentified_Ellin6529;f__unidentified_Ellin6529;g__unidentified_Ellin6529;s__unidentified_Ellin6529	0.9999999996948361
ASV_1517	d__Bacteria;p__Actinobacteria;c__Actinobacteria;o__Actinomycetales;f__Microbacteriaceae;g__unclassified_Microbacteriaceae;s__unclassified_Microbacteriaceae	0.83019188288577
ASV_1518	d__Bacteria;p__Firmicutes;c__Clostridia;o__Clostridiales;f__unidentified_Clostridiales;g__unidentified_Clostridiales;s__unidentified_Clostridiales	0.9892438807186908
ASV_1519	d__Bacteria;p__Proteobacteria;c__Betaproteobacteria;o__unclassified_Betaproteobacteria;f__unclassified_Betaproteobacteria;g__unclassified_Betaproteobacteria;s__unclassified_Betaproteobacteria	0.9999996028927916
ASV_1520	d__Bacteria;p__Proteobacteria;c__Alphaproteobacteria;o__Rhizobiales;f__unclassified_Rhizobiales;g__unclassified_Rhizobiales;s__unclassified_Rhizobiales	0.9690762107645231
ASV_1521	d__Bacteria;p__Firmicutes;c__Clostridia;o__Clostridiales;f__unidentified_Clostridiales;g__unidentified_Clostridiales;s__unidentified_Clostridiales	0.9701908704181604
ASV_1522	d__Bacteria;p__Proteobacteria;c__Betaproteobacteria;o__Burkholderiales;f__Comamonadaceae;g__unclassified_Comamonadaceae;s__unclassified_Comamonadaceae	0.9921985740190274
ASV_1523	d__Bacteria;p__Firmicutes;c__Bacilli;o__Lactobacillales;f__unclassified_Lactobacillales;g__unclassified_Lactobacillales;s__unclassified_Lactobacillales	0.9762391920880388
ASV_1524	d__Bacteria;p__Firmicutes;c__Clostridia;o__Clostridiales;f__Ruminococcaceae;g__unidentified_Ruminococcaceae;s__unidentified_Ruminococcaceae	0.9492420062183161
ASV_1525	d__Bacteria;p__Firmicutes;c__Clostridia;o__Clostridiales;f__unclassified_Clostridiales;g__unclassified_Clostridiales;s__unclassified_Clostridiales	0.9999999984540651
ASV_1526	d__Bacteria;p__Actinobacteria;c__Actinobacteria;o__Actinomycetales;f__Microbacteriaceae;g__unclassified_Microbacteriaceae;s__unclassified_Microbacteriaceae	0.9908189341753577
ASV_1527	d__Bacteria;p__Firmicutes;c__Clostridia;o__Clostridiales;f__Ruminococcaceae;g__Ruminococcus;s__unidentified_Ruminococcus	0.9999455094507814
ASV_1528	d__Bacteria;p__Firmicutes;c__Clostridia;o__Clostridiales;f__Ruminococcaceae;g__Oscillospira;s__unidentified_Oscillospira	0.9978915933445112
ASV_1529	d__Bacteria;p__Actinobacteria;c__Actinobacteria;o__Actinomycetales;f__unidentified_Actinomycetales;g__unidentified_Actinomycetales;s__unidentified_Actinomycetales	0.8337213475015625
ASV_1530	d__Bacteria;p__Bacteroidetes;c__Flavobacteriia;o__Flavobacteriales;f__Flavobacteriaceae;g__Flavobacterium;s__unidentified_Flavobacterium	0.9889609795384661
ASV_1531	d__Bacteria;p__Firmicutes;c__Clostridia;o__Clostridiales;f__unidentified_Clostridiales;g__unidentified_Clostridiales;s__unidentified_Clostridiales	0.923303835727633
ASV_1532	d__Bacteria;p__Firmicutes;c__Clostridia;o__Clostridiales;f__Peptostreptococcaceae;g__unclassified_Peptostreptococcaceae;s__unclassified_Peptostreptococcaceae	0.8658837605133707
ASV_1533	d__Bacteria;p__Actinobacteria;c__Actinobacteria;o__Actinomycetales;f__Streptomycetaceae;g__Streptomyces;s__unclassified_Streptomyces	0.7972799229817648
ASV_1534	d__Bacteria;p__Firmicutes;c__Clostridia;o__Clostridiales;f__unclassified_Clostridiales;g__unclassified_Clostridiales;s__unclassified_Clostridiales	0.9999821149556567
ASV_1535	d__Bacteria;p__Bacteroidetes;c__Bacteroidia;o__Bacteroidales;f__S24-7;g__unidentified_S24-7;s__unidentified_S24-7	0.9716895886518266
ASV_1536	d__Bacteria;p__unclassified_Bacteria;c__unclassified_Bacteria;o__unclassified_Bacteria;f__unclassified_Bacteria;g__unclassified_Bacteria;s__unclassified_Bacteria	0.9999999999966818
ASV_1537	d__Bacteria;p__Bacteroidetes;c__Bacteroidia;o__Bacteroidales;f__[Paraprevotellaceae];g__[Prevotella];s__unidentified_[Prevotella]	0.9989617476979394
ASV_1538	d__Bacteria;p__Firmicutes;c__Clostridia;o__Clostridiales;f__Ruminococcaceae;g__unclassified_Ruminococcaceae;s__unclassified_Ruminococcaceae	0.998231557468907
ASV_1539	d__Bacteria;p__Proteobacteria;c__Alphaproteobacteria;o__unclassified_Alphaproteobacteria;f__unclassified_Alphaproteobacteria;g__unclassified_Alphaproteobacteria;s__unclassified_Alphaproteobacteria	0.7981041145342829
ASV_1540	d__Bacteria;p__Firmicutes;c__Clostridia;o__Clostridiales;f__Ruminococcaceae;g__unidentified_Ruminococcaceae;s__unidentified_Ruminococcaceae	0.9981439240073335
ASV_1541	d__Bacteria;p__Bacteroidetes;c__Bacteroidia;o__Bacteroidales;f__Prevotellaceae;g__Prevotella;s__unidentified_Prevotella	0.9626198428884516
ASV_1542	d__Bacteria;p__Tenericutes;c__Mollicutes;o__RF39;f__unidentified_RF39;g__unidentified_RF39;s__unidentified_RF39	0.9999999997434657
ASV_1543	d__Bacteria;p__Proteobacteria;c__Gammaproteobacteria;o__Xanthomonadales;f__Xanthomonadaceae;g__unclassified_Xanthomonadaceae;s__unclassified_Xanthomonadaceae	0.9864799718869379
ASV_1544	d__Bacteria;p__Firmicutes;c__Clostridia;o__Clostridiales;f__Ruminococcaceae;g__unidentified_Ruminococcaceae;s__unidentified_Ruminococcaceae	0.988033309188336
ASV_1545	d__Bacteria;p__Proteobacteria;c__Gammaproteobacteria;o__unclassified_Gammaproteobacteria;f__unclassified_Gammaproteobacteria;g__unclassified_Gammaproteobacteria;s__unclassified_Gammaproteobacteria	0.7923119666123172
ASV_1546	d__Bacteria;p__Firmicutes;c__Clostridia;o__Clostridiales;f__Ruminococcaceae;g__unidentified_Ruminococcaceae;s__unidentified_Ruminococcaceae	0.8727182005506321
ASV_1547	d__Bacteria;p__Firmicutes;c__Clostridia;o__Clostridiales;f__Lachnospiraceae;g__unidentified_Lachnospiraceae;s__unidentified_Lachnospiraceae	0.7026058114063162
ASV_1548	d__Bacteria;p__Firmicutes;c__Clostridia;o__Clostridiales;f__unidentified_Clostridiales;g__unidentified_Clostridiales;s__unidentified_Clostridiales	0.7449683999758279
ASV_1549	d__Bacteria;p__Firmicutes;c__Clostridia;o__Clostridiales;f__Ruminococcaceae;g__unidentified_Ruminococcaceae;s__unidentified_Ruminococcaceae	0.9894627933574733
ASV_1550	d__Bacteria;p__unidentified_Bacteria;c__unidentified_Bacteria;o__unidentified_Bacteria;f__unidentified_Bacteria;g__unidentified_Bacteria;s__unidentified_Bacteria	0.9098832838822736
ASV_1551	d__Bacteria;p__Actinobacteria;c__Actinobacteria;o__Actinomycetales;f__Micrococcaceae;g__Arthrobacter;s__unclassified_Arthrobacter	0.8276293024911436
ASV_1552	d__Bacteria;p__Firmicutes;c__Clostridia;o__Clostridiales;f__Ruminococcaceae;g__Ruminococcus;s__unidentified_Ruminococcus	0.9597677100708877
ASV_1553	d__Bacteria;p__Proteobacteria;c__Gammaproteobacteria;o__Pseudomonadales;f__Moraxellaceae;g__unclassified_Moraxellaceae;s__unclassified_Moraxellaceae	0.955088575530776
ASV_1554	d__Bacteria;p__Firmicutes;c__Bacilli;o__Bacillales;f__Planococcaceae;g__unclassified_Planococcaceae;s__unclassified_Planococcaceae	0.925792291639349
ASV_1555	d__Bacteria;p__Firmicutes;c__Clostridia;o__Clostridiales;f__Clostridiaceae;g__Proteiniclasticum;s__unidentified_Proteiniclasticum	0.9997935438590557
ASV_1556	d__Bacteria;p__Firmicutes;c__Clostridia;o__Clostridiales;f__Peptostreptococcaceae;g__unclassified_Peptostreptococcaceae;s__unclassified_Peptostreptococcaceae	0.8263552450694451
ASV_1557	d__Bacteria;p__Actinobacteria;c__Actinobacteria;o__Actinomycetales;f__Micrococcaceae;g__Arthrobacter;s__unclassified_Arthrobacter	0.881982453859257
ASV_1558	d__Bacteria;p__Bacteroidetes;c__Bacteroidia;o__Bacteroidales;f__S24-7;g__unidentified_S24-7;s__unidentified_S24-7	0.9999997427537768
ASV_1559	d__Bacteria;p__Firmicutes;c__Clostridia;o__Clostridiales;f__Ruminococcaceae;g__unclassified_Ruminococcaceae;s__unclassified_Ruminococcaceae	0.9986018994635574
ASV_1560	d__Bacteria;p__Proteobacteria;c__Gammaproteobacteria;o__Xanthomonadales;f__Xanthomonadaceae;g__Rhodanobacter;s__unclassified_Rhodanobacter	0.7523660284737379
ASV_1561	d__Bacteria;p__Firmicutes;c__Clostridia;o__Clostridiales;f__Lachnospiraceae;g__unidentified_Lachnospiraceae;s__unidentified_Lachnospiraceae	0.9636694010284019
ASV_1562	d__Bacteria;p__Actinobacteria;c__Actinobacteria;o__Actinomycetales;f__Mycobacteriaceae;g__Mycobacterium;s__unidentified_Mycobacterium	0.761578208816021
ASV_1563	d__Bacteria;p__Firmicutes;c__Bacilli;o__Lactobacillales;f__Lactobacillaceae;g__Lactobacillus;s__unclassified_Lactobacillus	0.9993351356734805
ASV_1564	d__Bacteria;p__Firmicutes;c__Clostridia;o__Clostridiales;f__Lachnospiraceae;g__Coprococcus;s__unidentified_Coprococcus	0.8971813412154718
ASV_1565	d__Bacteria;p__Firmicutes;c__Bacilli;o__Bacillales;f__Bacillaceae;g__unclassified_Bacillaceae;s__unclassified_Bacillaceae	0.9443953329725828
ASV_1566	d__Bacteria;p__Firmicutes;c__Clostridia;o__Clostridiales;f__Ruminococcaceae;g__unidentified_Ruminococcaceae;s__unidentified_Ruminococcaceae	0.9997760299161641
ASV_1567	d__Bacteria;p__Proteobacteria;c__Deltaproteobacteria;o__Myxococcales;f__unidentified_Myxococcales;g__unidentified_Myxococcales;s__unidentified_Myxococcales	0.9986214179667783
ASV_1568	d__Bacteria;p__Bacteroidetes;c__Bacteroidia;o__Bacteroidales;f__S24-7;g__unidentified_S24-7;s__unidentified_S24-7	0.9999999443299445
ASV_1569	d__Bacteria;p__Firmicutes;c__Clostridia;o__Clostridiales;f__Clostridiaceae;g__Clostridium;s__unclassified_Clostridium	0.9770626236793425
ASV_1570	d__Bacteria;p__unclassified_Bacteria;c__unclassified_Bacteria;o__unclassified_Bacteria;f__unclassified_Bacteria;g__unclassified_Bacteria;s__unclassified_Bacteria	0.9999999999959517
ASV_1571	d__Bacteria;p__Proteobacteria;c__Alphaproteobacteria;o__unidentified_Alphaproteobacteria;f__unidentified_Alphaproteobacteria;g__unidentified_Alphaproteobacteria;s__unidentified_Alphaproteobacteria	0.9187738248236054
ASV_1572	d__Bacteria;p__Acidobacteria;c__Solibacteres;o__Solibacterales;f__Solibacteraceae;g__Candidatus_Solibacter;s__unidentified_Candidatus_Solibacter	0.7378047903199809
ASV_1573	d__Bacteria;p__Bacteroidetes;c__Bacteroidia;o__Bacteroidales;f__Bacteroidaceae;g__Bacteroides;s__unidentified_Bacteroides	0.9999887131725737
ASV_1574	d__Bacteria;p__Firmicutes;c__Clostridia;o__Clostridiales;f__Ruminococcaceae;g__unidentified_Ruminococcaceae;s__unidentified_Ruminococcaceae	0.9664446229087991
ASV_1575	d__Bacteria;p__Proteobacteria;c__Gammaproteobacteria;o__Enterobacteriales;f__Enterobacteriaceae;g__unclassified_Enterobacteriaceae;s__unclassified_Enterobacteriaceae	0.999405906584162
ASV_1576	d__Bacteria;p__Firmicutes;c__Clostridia;o__Clostridiales;f__unidentified_Clostridiales;g__unidentified_Clostridiales;s__unidentified_Clostridiales	0.9945600629877237
ASV_1577	d__Bacteria;p__Firmicutes;c__Clostridia;o__Clostridiales;f__Ruminococcaceae;g__Ruminococcus;s__unidentified_Ruminococcus	0.9999815199738294
ASV_1578	d__Bacteria;p__Bacteroidetes;c__Bacteroidia;o__Bacteroidales;f__S24-7;g__unidentified_S24-7;s__unidentified_S24-7	0.7336149784921834
ASV_1579	d__Bacteria;p__Proteobacteria;c__Alphaproteobacteria;o__Sphingomonadales;f__Sphingomonadaceae;g__Sphingomonas;s__Sphingomonas_changbaiensis	0.807708336210446
ASV_1580	d__Bacteria;p__Firmicutes;c__Clostridia;o__Clostridiales;f__Christensenellaceae;g__Christensenella;s__unidentified_Christensenella	0.999996151204516
ASV_1581	d__Bacteria;p__unclassified_Bacteria;c__unclassified_Bacteria;o__unclassified_Bacteria;f__unclassified_Bacteria;g__unclassified_Bacteria;s__unclassified_Bacteria	0.9999999999762197
ASV_1582	d__Bacteria;p__Firmicutes;c__Clostridia;o__Clostridiales;f__unidentified_Clostridiales;g__unidentified_Clostridiales;s__unidentified_Clostridiales	0.9968877399783029
ASV_1583	d__Bacteria;p__Actinobacteria;c__Thermoleophilia;o__Gaiellales;f__Gaiellaceae;g__unidentified_Gaiellaceae;s__unidentified_Gaiellaceae	0.9995779241311193
ASV_1584	d__Bacteria;p__unclassified_Bacteria;c__unclassified_Bacteria;o__unclassified_Bacteria;f__unclassified_Bacteria;g__unclassified_Bacteria;s__unclassified_Bacteria	0.9999999999811725
ASV_1585	d__Bacteria;p__Proteobacteria;c__Alphaproteobacteria;o__Rhodospirillales;f__Acetobacteraceae;g__Acidisphaera;s__unidentified_Acidisphaera	0.7647354187628141
ASV_1586	d__Bacteria;p__Bacteroidetes;c__Bacteroidia;o__Bacteroidales;f__Bacteroidaceae;g__Bacteroides;s__unidentified_Bacteroides	0.9976202139570768
ASV_1587	d__Bacteria;p__Firmicutes;c__Bacilli;o__Bacillales;f__Planococcaceae;g__unclassified_Planococcaceae;s__unclassified_Planococcaceae	0.8036350804055861
ASV_1588	d__Bacteria;p__Actinobacteria;c__Actinobacteria;o__Actinomycetales;f__Micrococcaceae;g__Arthrobacter;s__unclassified_Arthrobacter	0.8542825600616127
ASV_1589	d__Bacteria;p__Firmicutes;c__Bacilli;o__Lactobacillales;f__Streptococcaceae;g__Streptococcus;s__Streptococcus_equi	0.9146450219975747
ASV_1590	d__Bacteria;p__Firmicutes;c__Clostridia;o__Clostridiales;f__Ruminococcaceae;g__unidentified_Ruminococcaceae;s__unidentified_Ruminococcaceae	0.9992590021434365
ASV_1591	d__Bacteria;p__Firmicutes;c__Clostridia;o__Clostridiales;f__Ruminococcaceae;g__Ruminococcus;s__unidentified_Ruminococcus	0.9843029872153515
ASV_1592	d__Bacteria;p__Bacteroidetes;c__Bacteroidia;o__Bacteroidales;f__[Paraprevotellaceae];g__CF231;s__unidentified_CF231	0.9974069577318674
ASV_1593	d__Bacteria;p__Chloroflexi;c__unclassified_Chloroflexi;o__unclassified_Chloroflexi;f__unclassified_Chloroflexi;g__unclassified_Chloroflexi;s__unclassified_Chloroflexi	0.7295247807795605
ASV_1594	d__Bacteria;p__Bacteroidetes;c__Bacteroidia;o__Bacteroidales;f__S24-7;g__unidentified_S24-7;s__unidentified_S24-7	0.9999969146913787
ASV_1595	d__Bacteria;p__Firmicutes;c__Clostridia;o__Clostridiales;f__unclassified_Clostridiales;g__unclassified_Clostridiales;s__unclassified_Clostridiales	0.9999961108280258
ASV_1596	d__Bacteria;p__Proteobacteria;c__Gammaproteobacteria;o__Enterobacteriales;f__Enterobacteriaceae;g__unclassified_Enterobacteriaceae;s__unclassified_Enterobacteriaceae	0.9544588281763106
ASV_1597	d__Bacteria;p__Firmicutes;c__Clostridia;o__Clostridiales;f__unidentified_Clostridiales;g__unidentified_Clostridiales;s__unidentified_Clostridiales	0.7417378649479645
ASV_1598	d__Bacteria;p__Actinobacteria;c__Actinobacteria;o__Actinomycetales;f__Beutenbergiaceae;g__unclassified_Beutenbergiaceae;s__unclassified_Beutenbergiaceae	0.7435186915255807
ASV_1599	d__Bacteria;p__Firmicutes;c__Bacilli;o__Lactobacillales;f__Lactobacillaceae;g__Lactobacillus;s__Lactobacillus_agilis	0.9999960455344906
ASV_1600	d__Bacteria;p__Proteobacteria;c__Gammaproteobacteria;o__Xanthomonadales;f__Xanthomonadaceae;g__Luteibacter;s__unidentified_Luteibacter	0.7435300910825207
ASV_1601	d__Bacteria;p__Firmicutes;c__Clostridia;o__Clostridiales;f__Ruminococcaceae;g__unidentified_Ruminococcaceae;s__unidentified_Ruminococcaceae	0.9963130745858156
ASV_1602	d__Bacteria;p__Firmicutes;c__Clostridia;o__Clostridiales;f__Ruminococcaceae;g__unclassified_Ruminococcaceae;s__unclassified_Ruminococcaceae	0.9993497032343397
ASV_1603	d__Bacteria;p__Proteobacteria;c__Gammaproteobacteria;o__Xanthomonadales;f__Xanthomonadaceae;g__Luteibacter;s__unidentified_Luteibacter	0.8847369493550903
ASV_1604	d__Bacteria;p__Tenericutes;c__Mollicutes;o__RF39;f__unidentified_RF39;g__unidentified_RF39;s__unidentified_RF39	0.9999999998717897
ASV_1605	d__Bacteria;p__Bacteroidetes;c__Bacteroidia;o__Bacteroidales;f__unidentified_Bacteroidales;g__unidentified_Bacteroidales;s__unidentified_Bacteroidales	0.7200630836965841
ASV_1606	d__Bacteria;p__Bacteroidetes;c__Bacteroidia;o__Bacteroidales;f__unclassified_Bacteroidales;g__unclassified_Bacteroidales;s__unclassified_Bacteroidales	0.9999175390331783
ASV_1607	d__Bacteria;p__Firmicutes;c__Clostridia;o__Clostridiales;f__Ruminococcaceae;g__Oscillospira;s__Oscillospira_guilliermondii	0.8031252039319392
ASV_1608	d__Bacteria;p__Firmicutes;c__Clostridia;o__Clostridiales;f__Ruminococcaceae;g__Ruminococcus;s__unidentified_Ruminococcus	0.9037300203141917
ASV_1609	d__Bacteria;p__Firmicutes;c__Clostridia;o__Clostridiales;f__[Tissierellaceae];g__Sedimentibacter;s__unidentified_Sedimentibacter	0.999999992586055
ASV_1610	d__Bacteria;p__Bacteroidetes;c__Bacteroidia;o__Bacteroidales;f__S24-7;g__unidentified_S24-7;s__unidentified_S24-7	0.9999999643055737
ASV_1611	d__Bacteria;p__unclassified_Bacteria;c__unclassified_Bacteria;o__unclassified_Bacteria;f__unclassified_Bacteria;g__unclassified_Bacteria;s__unclassified_Bacteria	0.9999999999998245
ASV_1612	d__Bacteria;p__Firmicutes;c__Erysipelotrichi;o__Erysipelotrichales;f__Erysipelotrichaceae;g__unidentified_Erysipelotrichaceae;s__unidentified_Erysipelotrichaceae	0.9880417335598893
ASV_1613	d__Bacteria;p__Tenericutes;c__Mollicutes;o__RF39;f__unidentified_RF39;g__unidentified_RF39;s__unidentified_RF39	0.999999999922295
ASV_1614	d__Bacteria;p__Firmicutes;c__Clostridia;o__Clostridiales;f__unidentified_Clostridiales;g__unidentified_Clostridiales;s__unidentified_Clostridiales	0.9999855808492742
ASV_1615	d__Bacteria;p__Bacteroidetes;c__Bacteroidia;o__Bacteroidales;f__S24-7;g__unidentified_S24-7;s__unidentified_S24-7	0.9999938902154983
ASV_1616	d__Bacteria;p__Acidobacteria;c__Acidobacteria-6;o__unidentified_Acidobacteria-6;f__unidentified_Acidobacteria-6;g__unidentified_Acidobacteria-6;s__unidentified_Acidobacteria-6	0.9989004080642147
ASV_1617	d__Bacteria;p__Proteobacteria;c__Gammaproteobacteria;o__Xanthomonadales;f__Xanthomonadaceae;g__Silanimonas;s__Silanimonas_lenta	0.9998090506883163
ASV_1618	d__Bacteria;p__Bacteroidetes;c__Bacteroidia;o__Bacteroidales;f__S24-7;g__unidentified_S24-7;s__unidentified_S24-7	0.9992143440426188
ASV_1619	d__Bacteria;p__Firmicutes;c__Clostridia;o__Clostridiales;f__Lachnospiraceae;g__unidentified_Lachnospiraceae;s__unidentified_Lachnospiraceae	0.7800409935288032
ASV_1620	d__Bacteria;p__unclassified_Bacteria;c__unclassified_Bacteria;o__unclassified_Bacteria;f__unclassified_Bacteria;g__unclassified_Bacteria;s__unclassified_Bacteria	0.9999999999998793
ASV_1621	d__Bacteria;p__Bacteroidetes;c__Bacteroidia;o__Bacteroidales;f__S24-7;g__unidentified_S24-7;s__unidentified_S24-7	0.9999998572960567
ASV_1622	d__Bacteria;p__Proteobacteria;c__Gammaproteobacteria;o__Xanthomonadales;f__Xanthomonadaceae;g__Lysobacter;s__Lysobacter_pocheonensis	0.9012416476518108
ASV_1623	d__Bacteria;p__Firmicutes;c__Clostridia;o__Clostridiales;f__Ruminococcaceae;g__Oscillospira;s__unidentified_Oscillospira	0.7154029782894727
ASV_1624	d__Bacteria;p__Actinobacteria;c__Actinobacteria;o__Actinomycetales;f__Nocardioidaceae;g__Nocardioides;s__unidentified_Nocardioides	0.9837283378743683
ASV_1625	d__Bacteria;p__Proteobacteria;c__Gammaproteobacteria;o__Pseudomonadales;f__Moraxellaceae;g__Acinetobacter;s__unclassified_Acinetobacter	0.9999880962199097
ASV_1626	d__Bacteria;p__Firmicutes;c__Clostridia;o__Clostridiales;f__unidentified_Clostridiales;g__unidentified_Clostridiales;s__unidentified_Clostridiales	0.999889071691724
ASV_1627	d__Bacteria;p__Proteobacteria;c__Gammaproteobacteria;o__Xanthomonadales;f__Xanthomonadaceae;g__unidentified_Xanthomonadaceae;s__unidentified_Xanthomonadaceae	0.9659708735437406
ASV_1628	d__Bacteria;p__Proteobacteria;c__Gammaproteobacteria;o__Pseudomonadales;f__Moraxellaceae;g__Acinetobacter;s__Acinetobacter_guillouiae	0.780531554788249
ASV_1629	d__Bacteria;p__Proteobacteria;c__Gammaproteobacteria;o__Enterobacteriales;f__Enterobacteriaceae;g__Shigella;s__unclassified_Shigella	0.9325268904031734
ASV_1630	d__Bacteria;p__Actinobacteria;c__Actinobacteria;o__Actinomycetales;f__Sporichthyaceae;g__unidentified_Sporichthyaceae;s__unidentified_Sporichthyaceae	0.9922697721895938
ASV_1631	d__Bacteria;p__Proteobacteria;c__Gammaproteobacteria;o__Xanthomonadales;f__Xanthomonadaceae;g__Lysobacter;s__unclassified_Lysobacter	0.9998919597230203
ASV_1632	d__Bacteria;p__Bacteroidetes;c__Bacteroidia;o__Bacteroidales;f__Bacteroidaceae;g__Bacteroides;s__unidentified_Bacteroides	0.9956502352427455
ASV_1633	d__Bacteria;p__Firmicutes;c__Clostridia;o__Clostridiales;f__Lachnospiraceae;g__unidentified_Lachnospiraceae;s__unidentified_Lachnospiraceae	0.7796729929617502
ASV_1634	d__Bacteria;p__Firmicutes;c__Clostridia;o__Clostridiales;f__Lachnospiraceae;g__unidentified_Lachnospiraceae;s__unidentified_Lachnospiraceae	0.7419224089186135
ASV_1635	d__Bacteria;p__Bacteroidetes;c__Bacteroidia;o__Bacteroidales;f__Prevotellaceae;g__Prevotella;s__unidentified_Prevotella	0.9998421028354589
ASV_1636	d__Bacteria;p__Actinobacteria;c__Actinobacteria;o__Actinomycetales;f__Microbacteriaceae;g__unclassified_Microbacteriaceae;s__unclassified_Microbacteriaceae	0.9986359878570208
ASV_1637	d__Bacteria;p__unclassified_Bacteria;c__unclassified_Bacteria;o__unclassified_Bacteria;f__unclassified_Bacteria;g__unclassified_Bacteria;s__unclassified_Bacteria	0.9999999988797141
ASV_1638	d__Bacteria;p__Firmicutes;c__Clostridia;o__Clostridiales;f__Ruminococcaceae;g__unclassified_Ruminococcaceae;s__unclassified_Ruminococcaceae	0.8875053373082324
ASV_1639	d__Bacteria;p__Proteobacteria;c__Betaproteobacteria;o__Burkholderiales;f__Comamonadaceae;g__unclassified_Comamonadaceae;s__unclassified_Comamonadaceae	0.9928164460260421
ASV_1640	d__Bacteria;p__Firmicutes;c__Bacilli;o__Lactobacillales;f__unclassified_Lactobacillales;g__unclassified_Lactobacillales;s__unclassified_Lactobacillales	0.8452723204443647
ASV_1641	d__Bacteria;p__Bacteroidetes;c__Bacteroidia;o__Bacteroidales;f__S24-7;g__unidentified_S24-7;s__unidentified_S24-7	0.9999999645744999
ASV_1642	d__Bacteria;p__Firmicutes;c__Clostridia;o__Clostridiales;f__unclassified_Clostridiales;g__unclassified_Clostridiales;s__unclassified_Clostridiales	0.9999983781344447
ASV_1643	d__Bacteria;p__Bacteroidetes;c__Bacteroidia;o__Bacteroidales;f__S24-7;g__unidentified_S24-7;s__unidentified_S24-7	0.9999998701331179
ASV_1644	d__Bacteria;p__Firmicutes;c__Clostridia;o__Clostridiales;f__Clostridiaceae;g__Clostridium;s__unclassified_Clostridium	0.8488689197726624
ASV_1645	d__Bacteria;p__Firmicutes;c__Clostridia;o__Clostridiales;f__unidentified_Clostridiales;g__unidentified_Clostridiales;s__unidentified_Clostridiales	0.9802790322500123
ASV_1646	d__Bacteria;p__Firmicutes;c__Clostridia;o__Clostridiales;f__unclassified_Clostridiales;g__unclassified_Clostridiales;s__unclassified_Clostridiales	0.9999919906927631
ASV_1647	d__Bacteria;p__Firmicutes;c__Clostridia;o__Clostridiales;f__Lachnospiraceae;g__unidentified_Lachnospiraceae;s__unidentified_Lachnospiraceae	0.7018074329910724
ASV_1648	d__Bacteria;p__Firmicutes;c__Clostridia;o__Clostridiales;f__Lachnospiraceae;g__unclassified_Lachnospiraceae;s__unclassified_Lachnospiraceae	0.975387758195113
ASV_1649	d__Bacteria;p__Firmicutes;c__Clostridia;o__Clostridiales;f__Ruminococcaceae;g__unidentified_Ruminococcaceae;s__unidentified_Ruminococcaceae	0.9605224148722212
ASV_1650	d__Bacteria;p__Firmicutes;c__Clostridia;o__Clostridiales;f__Peptostreptococcaceae;g__Clostridium;s__unclassified_Clostridium	0.7083361548575959
ASV_1651	d__Bacteria;p__Firmicutes;c__Clostridia;o__Clostridiales;f__Christensenellaceae;g__unidentified_Christensenellaceae;s__unidentified_Christensenellaceae	0.9542884255622138
ASV_1652	d__Bacteria;p__Firmicutes;c__Clostridia;o__Clostridiales;f__unidentified_Clostridiales;g__unidentified_Clostridiales;s__unidentified_Clostridiales	0.9997298181196221
ASV_1653	d__Bacteria;p__Firmicutes;c__Clostridia;o__Clostridiales;f__unidentified_Clostridiales;g__unidentified_Clostridiales;s__unidentified_Clostridiales	0.9269888575107627
ASV_1654	d__Bacteria;p__Firmicutes;c__Clostridia;o__Clostridiales;f__Clostridiaceae;g__Clostridium;s__unidentified_Clostridium	0.825956068924895
ASV_1655	d__Bacteria;p__Firmicutes;c__Clostridia;o__Clostridiales;f__Ruminococcaceae;g__Oscillospira;s__unidentified_Oscillospira	0.9998126213852724
ASV_1656	d__Bacteria;p__Firmicutes;c__Clostridia;o__Clostridiales;f__Peptostreptococcaceae;g__unclassified_Peptostreptococcaceae;s__unclassified_Peptostreptococcaceae	0.860866755413934
ASV_1657	d__Bacteria;p__Proteobacteria;c__unclassified_Proteobacteria;o__unclassified_Proteobacteria;f__unclassified_Proteobacteria;g__unclassified_Proteobacteria;s__unclassified_Proteobacteria	0.997583427384705
ASV_1658	d__Bacteria;p__Firmicutes;c__Clostridia;o__Clostridiales;f__unidentified_Clostridiales;g__unidentified_Clostridiales;s__unidentified_Clostridiales	0.981249840060637
ASV_1659	d__Bacteria;p__Firmicutes;c__Clostridia;o__Clostridiales;f__Ruminococcaceae;g__unidentified_Ruminococcaceae;s__unidentified_Ruminococcaceae	0.9755045449308035
ASV_1660	d__Bacteria;p__unclassified_Bacteria;c__unclassified_Bacteria;o__unclassified_Bacteria;f__unclassified_Bacteria;g__unclassified_Bacteria;s__unclassified_Bacteria	0.9999999999785637
ASV_1661	d__Bacteria;p__Firmicutes;c__Clostridia;o__Clostridiales;f__Lachnospiraceae;g__unidentified_Lachnospiraceae;s__unidentified_Lachnospiraceae	0.7852079110550007
ASV_1662	d__Bacteria;p__Firmicutes;c__Clostridia;o__Clostridiales;f__unidentified_Clostridiales;g__unidentified_Clostridiales;s__unidentified_Clostridiales	0.9999820499824729
ASV_1663	d__Bacteria;p__Firmicutes;c__Clostridia;o__Clostridiales;f__Ruminococcaceae;g__unidentified_Ruminococcaceae;s__unidentified_Ruminococcaceae	0.746664728432302
ASV_1664	d__Bacteria;p__Firmicutes;c__Clostridia;o__Clostridiales;f__Ruminococcaceae;g__unidentified_Ruminococcaceae;s__unidentified_Ruminococcaceae	0.9806770415377947
ASV_1665	d__Bacteria;p__unidentified_Bacteria;c__unidentified_Bacteria;o__unidentified_Bacteria;f__unidentified_Bacteria;g__unidentified_Bacteria;s__unidentified_Bacteria	0.9987438039110459
ASV_1666	d__Bacteria;p__Bacteroidetes;c__Bacteroidia;o__Bacteroidales;f__S24-7;g__unidentified_S24-7;s__unidentified_S24-7	0.9999996437790125
ASV_1667	d__Bacteria;p__Bacteroidetes;c__Bacteroidia;o__Bacteroidales;f__S24-7;g__unidentified_S24-7;s__unidentified_S24-7	0.9982484393871774
ASV_1668	d__Bacteria;p__Firmicutes;c__Clostridia;o__Clostridiales;f__Ruminococcaceae;g__unidentified_Ruminococcaceae;s__unidentified_Ruminococcaceae	0.9952413306306032
ASV_1669	d__Bacteria;p__TM7;c__TM7-1;o__unidentified_TM7-1;f__unidentified_TM7-1;g__unidentified_TM7-1;s__unidentified_TM7-1	0.9989294783470213
ASV_1670	d__Bacteria;p__Proteobacteria;c__Gammaproteobacteria;o__Alteromonadales;f__Alteromonadaceae;g__Cellvibrio;s__unidentified_Cellvibrio	0.9808165961596297
ASV_1671	d__Bacteria;p__Firmicutes;c__Clostridia;o__Clostridiales;f__unclassified_Clostridiales;g__unclassified_Clostridiales;s__unclassified_Clostridiales	0.999999999956923
ASV_1672	d__Bacteria;p__Proteobacteria;c__Gammaproteobacteria;o__Legionellales;f__Coxiellaceae;g__unidentified_Coxiellaceae;s__unidentified_Coxiellaceae	0.9896056594935934
ASV_1673	d__Bacteria;p__Bacteroidetes;c__[Saprospirae];o__[Saprospirales];f__Chitinophagaceae;g__unclassified_Chitinophagaceae;s__unclassified_Chitinophagaceae	0.8074890841982232
ASV_1674	d__Bacteria;p__unclassified_Bacteria;c__unclassified_Bacteria;o__unclassified_Bacteria;f__unclassified_Bacteria;g__unclassified_Bacteria;s__unclassified_Bacteria	0.9999999999241023
ASV_1675	d__Bacteria;p__unidentified_Bacteria;c__unidentified_Bacteria;o__unidentified_Bacteria;f__unidentified_Bacteria;g__unidentified_Bacteria;s__unidentified_Bacteria	0.8116555921900768
ASV_1676	d__Bacteria;p__Bacteroidetes;c__Bacteroidia;o__Bacteroidales;f__Porphyromonadaceae;g__Parabacteroides;s__unidentified_Parabacteroides	0.9995105959634367
ASV_1677	d__Bacteria;p__Proteobacteria;c__Gammaproteobacteria;o__Enterobacteriales;f__Enterobacteriaceae;g__unclassified_Enterobacteriaceae;s__unclassified_Enterobacteriaceae	0.9999782593475312
ASV_1678	d__Bacteria;p__Firmicutes;c__Clostridia;o__Clostridiales;f__Ruminococcaceae;g__Ruminococcus;s__unidentified_Ruminococcus	0.8884159863985737
ASV_1679	d__Bacteria;p__Acidobacteria;c__Solibacteres;o__Solibacterales;f__OPB3;g__unidentified_OPB3;s__unidentified_OPB3	0.7677485167135334
ASV_1680	d__Bacteria;p__Firmicutes;c__Clostridia;o__Clostridiales;f__unclassified_Clostridiales;g__unclassified_Clostridiales;s__unclassified_Clostridiales	0.9999987775241023
ASV_1681	d__Bacteria;p__Bacteroidetes;c__Bacteroidia;o__Bacteroidales;f__unclassified_Bacteroidales;g__unclassified_Bacteroidales;s__unclassified_Bacteroidales	0.9736071813038205
ASV_1682	d__Bacteria;p__Firmicutes;c__Clostridia;o__Clostridiales;f__Lachnospiraceae;g__unidentified_Lachnospiraceae;s__unidentified_Lachnospiraceae	0.9473373745631535
ASV_1683	d__Bacteria;p__Firmicutes;c__Clostridia;o__Clostridiales;f__unidentified_Clostridiales;g__unidentified_Clostridiales;s__unidentified_Clostridiales	0.9998141789842171
ASV_1684	d__Bacteria;p__Firmicutes;c__Clostridia;o__Clostridiales;f__Clostridiaceae;g__Clostridium;s__unclassified_Clostridium	0.9295298309967038
ASV_1685	d__Bacteria;p__Firmicutes;c__Clostridia;o__Clostridiales;f__unidentified_Clostridiales;g__unidentified_Clostridiales;s__unidentified_Clostridiales	0.9821714551663112
ASV_1686	d__Bacteria;p__Firmicutes;c__Clostridia;o__Clostridiales;f__unidentified_Clostridiales;g__unidentified_Clostridiales;s__unidentified_Clostridiales	0.997326534862391
ASV_1687	d__Bacteria;p__Firmicutes;c__Clostridia;o__Clostridiales;f__unclassified_Clostridiales;g__unclassified_Clostridiales;s__unclassified_Clostridiales	0.9999999774279611
ASV_1688	d__Bacteria;p__Firmicutes;c__Clostridia;o__Clostridiales;f__Ruminococcaceae;g__unclassified_Ruminococcaceae;s__unclassified_Ruminococcaceae	0.7278130760331185
ASV_1689	d__Bacteria;p__Firmicutes;c__Clostridia;o__Clostridiales;f__Peptostreptococcaceae;g__unidentified_Peptostreptococcaceae;s__unidentified_Peptostreptococcaceae	0.9621270796519659
ASV_1690	d__Bacteria;p__Proteobacteria;c__Betaproteobacteria;o__Burkholderiales;f__Comamonadaceae;g__unclassified_Comamonadaceae;s__unclassified_Comamonadaceae	0.9966872015655412
ASV_1691	d__Bacteria;p__unclassified_Bacteria;c__unclassified_Bacteria;o__unclassified_Bacteria;f__unclassified_Bacteria;g__unclassified_Bacteria;s__unclassified_Bacteria	0.9999999996960675
ASV_1692	d__Bacteria;p__Firmicutes;c__Clostridia;o__Clostridiales;f__unidentified_Clostridiales;g__unidentified_Clostridiales;s__unidentified_Clostridiales	0.9886745408683837
ASV_1693	d__Bacteria;p__Firmicutes;c__Clostridia;o__Clostridiales;f__unidentified_Clostridiales;g__unidentified_Clostridiales;s__unidentified_Clostridiales	0.9717973832317247
ASV_1694	d__Bacteria;p__Actinobacteria;c__Actinobacteria;o__Actinomycetales;f__Streptosporangiaceae;g__unclassified_Streptosporangiaceae;s__unclassified_Streptosporangiaceae	0.9998664175785145
ASV_1695	d__Bacteria;p__Firmicutes;c__Clostridia;o__Clostridiales;f__Ruminococcaceae;g__Oscillospira;s__unidentified_Oscillospira	0.9996465489142513
ASV_1696	d__Bacteria;p__Firmicutes;c__Clostridia;o__Clostridiales;f__Lachnospiraceae;g__unidentified_Lachnospiraceae;s__unidentified_Lachnospiraceae	0.8469866384531082
ASV_1697	d__Bacteria;p__Proteobacteria;c__Betaproteobacteria;o__Burkholderiales;f__Oxalobacteraceae;g__Massilia;s__Massilia_aerilata	0.7464555224685816
ASV_1698	d__Bacteria;p__Firmicutes;c__Clostridia;o__Clostridiales;f__unidentified_Clostridiales;g__unidentified_Clostridiales;s__unidentified_Clostridiales	0.9892017928206317
ASV_1699	d__Bacteria;p__Proteobacteria;c__Gammaproteobacteria;o__Pseudomonadales;f__Moraxellaceae;g__Psychrobacter;s__unclassified_Psychrobacter	0.9976202537372706
ASV_1700	d__Bacteria;p__Bacteroidetes;c__Bacteroidia;o__Bacteroidales;f__[Paraprevotellaceae];g__CF231;s__unidentified_CF231	0.999956618205178
ASV_1701	d__Bacteria;p__Firmicutes;c__Clostridia;o__Clostridiales;f__Lachnospiraceae;g__Coprococcus;s__unidentified_Coprococcus	0.9950094574435264
ASV_1702	d__Bacteria;p__Firmicutes;c__Clostridia;o__Clostridiales;f__Christensenellaceae;g__unidentified_Christensenellaceae;s__unidentified_Christensenellaceae	0.7297675442452369
ASV_1703	d__Bacteria;p__Proteobacteria;c__Betaproteobacteria;o__Burkholderiales;f__Comamonadaceae;g__unclassified_Comamonadaceae;s__unclassified_Comamonadaceae	0.9839510259119012
ASV_1704	d__Bacteria;p__Proteobacteria;c__Betaproteobacteria;o__Burkholderiales;f__Alcaligenaceae;g__Sutterella;s__unidentified_Sutterella	0.9999996261945073
ASV_1705	d__Bacteria;p__unclassified_Bacteria;c__unclassified_Bacteria;o__unclassified_Bacteria;f__unclassified_Bacteria;g__unclassified_Bacteria;s__unclassified_Bacteria	0.999999999999756
ASV_1706	d__Bacteria;p__unclassified_Bacteria;c__unclassified_Bacteria;o__unclassified_Bacteria;f__unclassified_Bacteria;g__unclassified_Bacteria;s__unclassified_Bacteria	0.9999999999845053
ASV_1707	d__Bacteria;p__Firmicutes;c__Clostridia;o__Clostridiales;f__Lachnospiraceae;g__Clostridium;s__unclassified_Clostridium	0.811408696849733
ASV_1708	d__Bacteria;p__Firmicutes;c__Clostridia;o__Clostridiales;f__Ruminococcaceae;g__Oscillospira;s__unidentified_Oscillospira	0.7579338330409862
ASV_1709	d__Bacteria;p__Bacteroidetes;c__Bacteroidia;o__Bacteroidales;f__S24-7;g__unidentified_S24-7;s__unidentified_S24-7	0.9997836069999931
ASV_1710	d__Bacteria;p__Firmicutes;c__Clostridia;o__Clostridiales;f__unidentified_Clostridiales;g__unidentified_Clostridiales;s__unidentified_Clostridiales	0.884125506044841
ASV_1711	d__Bacteria;p__Firmicutes;c__Clostridia;o__Clostridiales;f__Ruminococcaceae;g__Ruminococcus;s__Ruminococcus_albus	0.9948402315614425
ASV_1712	d__Bacteria;p__Actinobacteria;c__Actinobacteria;o__Actinomycetales;f__Microbacteriaceae;g__unclassified_Microbacteriaceae;s__unclassified_Microbacteriaceae	0.9995009711234738
ASV_1713	d__Bacteria;p__Verrucomicrobia;c__[Pedosphaerae];o__[Pedosphaerales];f__unidentified_[Pedosphaerales];g__unidentified_[Pedosphaerales];s__unidentified_[Pedosphaerales]	0.8930709101666683
ASV_1714	d__Bacteria;p__Firmicutes;c__Bacilli;o__Lactobacillales;f__Lactobacillaceae;g__Lactobacillus;s__unclassified_Lactobacillus	0.9476830068126266
ASV_1715	d__Bacteria;p__Firmicutes;c__Clostridia;o__Clostridiales;f__unclassified_Clostridiales;g__unclassified_Clostridiales;s__unclassified_Clostridiales	0.9968911543807407
ASV_1716	d__Bacteria;p__Proteobacteria;c__Betaproteobacteria;o__Methylophilales;f__Methylophilaceae;g__Methylotenera;s__Methylotenera_versatilis	0.9416776370533635
ASV_1717	d__Bacteria;p__Firmicutes;c__Bacilli;o__Turicibacterales;f__Turicibacteraceae;g__Turicibacter;s__unidentified_Turicibacter	0.9999985173640389
ASV_1718	d__Bacteria;p__Firmicutes;c__Clostridia;o__Clostridiales;f__[Mogibacteriaceae];g__unidentified_[Mogibacteriaceae];s__unidentified_[Mogibacteriaceae]	0.9988218668501199
ASV_1719	d__Bacteria;p__Firmicutes;c__Clostridia;o__Clostridiales;f__unidentified_Clostridiales;g__unidentified_Clostridiales;s__unidentified_Clostridiales	0.8456126337622644
ASV_1720	d__Bacteria;p__Firmicutes;c__Clostridia;o__Clostridiales;f__Ruminococcaceae;g__unidentified_Ruminococcaceae;s__unidentified_Ruminococcaceae	0.9717914233371011
ASV_1721	d__Bacteria;p__Proteobacteria;c__Gammaproteobacteria;o__Pseudomonadales;f__Moraxellaceae;g__Acinetobacter;s__Acinetobacter_lwoffii	0.7704043166415653
ASV_1722	d__Bacteria;p__Proteobacteria;c__Alphaproteobacteria;o__Rhizobiales;f__Hyphomicrobiaceae;g__unclassified_Hyphomicrobiaceae;s__unclassified_Hyphomicrobiaceae	0.7306653360460807
ASV_1723	d__Bacteria;p__Proteobacteria;c__Alphaproteobacteria;o__Caulobacterales;f__Caulobacteraceae;g__Nitrobacteria;s__Nitrobacteria_hamadaniensis	0.9950439926179615
ASV_1724	d__Bacteria;p__unclassified_Bacteria;c__unclassified_Bacteria;o__unclassified_Bacteria;f__unclassified_Bacteria;g__unclassified_Bacteria;s__unclassified_Bacteria	0.9999999999411389
ASV_1725	d__Bacteria;p__Firmicutes;c__Clostridia;o__Clostridiales;f__Lachnospiraceae;g__unidentified_Lachnospiraceae;s__unidentified_Lachnospiraceae	0.741859695688853
ASV_1726	d__Bacteria;p__Firmicutes;c__Clostridia;o__Clostridiales;f__Ruminococcaceae;g__unidentified_Ruminococcaceae;s__unidentified_Ruminococcaceae	0.9935224041630589
ASV_1727	d__Bacteria;p__Firmicutes;c__Clostridia;o__Clostridiales;f__Ruminococcaceae;g__unidentified_Ruminococcaceae;s__unidentified_Ruminococcaceae	0.7377400236686209
ASV_1728	d__Bacteria;p__Firmicutes;c__Clostridia;o__Clostridiales;f__Veillonellaceae;g__Succinispira;s__Succinispira_mobilis	0.9999999807970428
ASV_1729	d__Bacteria;p__Bacteroidetes;c__Bacteroidia;o__Bacteroidales;f__Porphyromonadaceae;g__Macellibacteroides;s__Macellibacteroides_fermentans	0.999997590535177
ASV_1730	d__Bacteria;p__Proteobacteria;c__Betaproteobacteria;o__Burkholderiales;f__Burkholderiaceae;g__Burkholderia;s__Burkholderia_graminis	0.7876287300278686
ASV_1731	d__Bacteria;p__Proteobacteria;c__Alphaproteobacteria;o__Sphingomonadales;f__Sphingomonadaceae;g__Sphingomonas;s__unclassified_Sphingomonas	0.7948465238869517
ASV_1732	d__Bacteria;p__Tenericutes;c__Mollicutes;o__RF39;f__unidentified_RF39;g__unidentified_RF39;s__unidentified_RF39	0.9999999063767334
ASV_1733	d__Bacteria;p__Proteobacteria;c__Betaproteobacteria;o__Burkholderiales;f__Comamonadaceae;g__unclassified_Comamonadaceae;s__unclassified_Comamonadaceae	0.9979534293663969
ASV_1734	d__Bacteria;p__Firmicutes;c__Clostridia;o__Clostridiales;f__Ruminococcaceae;g__unidentified_Ruminococcaceae;s__unidentified_Ruminococcaceae	0.9924309559808858
ASV_1735	d__Bacteria;p__Firmicutes;c__Clostridia;o__Clostridiales;f__unidentified_Clostridiales;g__unidentified_Clostridiales;s__unidentified_Clostridiales	0.9944251799949563
ASV_1736	d__Bacteria;p__Proteobacteria;c__Alphaproteobacteria;o__Sphingomonadales;f__unclassified_Sphingomonadales;g__unclassified_Sphingomonadales;s__unclassified_Sphingomonadales	0.7538810456558713
ASV_1737	d__Bacteria;p__Acidobacteria;c__BPC102;o__MVS-40;f__unidentified_MVS-40;g__unidentified_MVS-40;s__unidentified_MVS-40	0.9999999439910725
ASV_1738	d__Bacteria;p__Actinobacteria;c__Actinobacteria;o__Actinomycetales;f__Nocardioidaceae;g__Nocardioides;s__unclassified_Nocardioides	0.9866796668027651
ASV_1739	d__Bacteria;p__Firmicutes;c__Clostridia;o__Clostridiales;f__unidentified_Clostridiales;g__unidentified_Clostridiales;s__unidentified_Clostridiales	0.9752949570593963
ASV_1740	d__Bacteria;p__Firmicutes;c__Clostridia;o__Clostridiales;f__Ruminococcaceae;g__Oscillospira;s__unidentified_Oscillospira	0.9137460681036021
ASV_1741	d__Bacteria;p__Proteobacteria;c__Alphaproteobacteria;o__Rhizobiales;f__Hyphomicrobiaceae;g__unclassified_Hyphomicrobiaceae;s__unclassified_Hyphomicrobiaceae	0.9997989177644432
ASV_1742	d__Bacteria;p__unclassified_Bacteria;c__unclassified_Bacteria;o__unclassified_Bacteria;f__unclassified_Bacteria;g__unclassified_Bacteria;s__unclassified_Bacteria	0.9999999999834557
ASV_1743	d__Bacteria;p__unclassified_Bacteria;c__unclassified_Bacteria;o__unclassified_Bacteria;f__unclassified_Bacteria;g__unclassified_Bacteria;s__unclassified_Bacteria	0.9999999999999426
ASV_1744	d__Bacteria;p__Proteobacteria;c__Gammaproteobacteria;o__Enterobacteriales;f__Enterobacteriaceae;g__unclassified_Enterobacteriaceae;s__unclassified_Enterobacteriaceae	0.9994290811156716
ASV_1745	d__Bacteria;p__Firmicutes;c__Clostridia;o__Clostridiales;f__unidentified_Clostridiales;g__unidentified_Clostridiales;s__unidentified_Clostridiales	0.9947780364243367
ASV_1746	d__Bacteria;p__Actinobacteria;c__Acidimicrobiia;o__Acidimicrobiales;f__unidentified_Acidimicrobiales;g__unidentified_Acidimicrobiales;s__unidentified_Acidimicrobiales	0.9934644680117106
ASV_1747	d__Bacteria;p__Bacteroidetes;c__Bacteroidia;o__Bacteroidales;f__S24-7;g__unidentified_S24-7;s__unidentified_S24-7	0.9991143789776554
ASV_1748	d__Bacteria;p__Proteobacteria;c__Alphaproteobacteria;o__unclassified_Alphaproteobacteria;f__unclassified_Alphaproteobacteria;g__unclassified_Alphaproteobacteria;s__unclassified_Alphaproteobacteria	0.7033736749743514
ASV_1749	d__Bacteria;p__Proteobacteria;c__Gammaproteobacteria;o__Enterobacteriales;f__Enterobacteriaceae;g__unclassified_Enterobacteriaceae;s__unclassified_Enterobacteriaceae	0.9846445430269599
ASV_1750	d__Bacteria;p__Firmicutes;c__Clostridia;o__Clostridiales;f__Lachnospiraceae;g__unclassified_Lachnospiraceae;s__unclassified_Lachnospiraceae	0.9605443847039532
ASV_1751	d__Bacteria;p__Acidobacteria;c__Acidobacteriia;o__Acidobacteriales;f__Acidobacteriaceae;g__unidentified_Acidobacteriaceae;s__unidentified_Acidobacteriaceae	0.996685128648471
ASV_1752	d__Bacteria;p__Gemmatimonadetes;c__Gemmatimonadetes;o__Ellin5290;f__unidentified_Ellin5290;g__unidentified_Ellin5290;s__unidentified_Ellin5290	0.9999671566837042
ASV_1753	d__Bacteria;p__Actinobacteria;c__Actinobacteria;o__Actinomycetales;f__Mycobacteriaceae;g__Mycobacterium;s__unidentified_Mycobacterium	0.9438201691359935
ASV_1754	d__Bacteria;p__Firmicutes;c__Clostridia;o__Clostridiales;f__Ruminococcaceae;g__unidentified_Ruminococcaceae;s__unidentified_Ruminococcaceae	0.924245432257329
ASV_1755	d__Bacteria;p__Firmicutes;c__Clostridia;o__Clostridiales;f__unidentified_Clostridiales;g__unidentified_Clostridiales;s__unidentified_Clostridiales	0.9435732474268184
ASV_1756	d__Bacteria;p__Bacteroidetes;c__Bacteroidia;o__Bacteroidales;f__S24-7;g__unidentified_S24-7;s__unidentified_S24-7	0.8769728838109822
ASV_1757	d__Bacteria;p__Bacteroidetes;c__Bacteroidia;o__Bacteroidales;f__Bacteroidaceae;g__Bacteroides;s__unidentified_Bacteroides	0.9964689649853972
ASV_1758	d__Bacteria;p__Firmicutes;c__Bacilli;o__Bacillales;f__Paenibacillaceae;g__Paenibacillus;s__unidentified_Paenibacillus	0.8017421602668762
ASV_1759	d__Bacteria;p__Proteobacteria;c__Alphaproteobacteria;o__Caulobacterales;f__Caulobacteraceae;g__Brevundimonas;s__unclassified_Brevundimonas	0.9591901938411321
ASV_1760	d__Bacteria;p__Firmicutes;c__Clostridia;o__Clostridiales;f__Ruminococcaceae;g__unidentified_Ruminococcaceae;s__unidentified_Ruminococcaceae	0.7937860732574105
ASV_1761	d__Bacteria;p__Firmicutes;c__Bacilli;o__Bacillales;f__Bacillaceae;g__Bacillus;s__Bacillus_coahuilensis	0.8866095159420695
ASV_1762	d__Bacteria;p__Bacteroidetes;c__Bacteroidia;o__Bacteroidales;f__Bacteroidaceae;g__Bacteroides;s__unidentified_Bacteroides	0.9478749181383863
ASV_1763	d__Bacteria;p__Firmicutes;c__Clostridia;o__Clostridiales;f__Lachnospiraceae;g__Roseburia;s__unidentified_Roseburia	0.7817352149416754
ASV_1764	d__Bacteria;p__Proteobacteria;c__Betaproteobacteria;o__Burkholderiales;f__Comamonadaceae;g__unclassified_Comamonadaceae;s__unclassified_Comamonadaceae	0.9999848874844222
ASV_1765	d__Bacteria;p__Proteobacteria;c__Alphaproteobacteria;o__Ellin329;f__unidentified_Ellin329;g__unidentified_Ellin329;s__unidentified_Ellin329	0.9999935591962639
ASV_1766	d__Bacteria;p__Proteobacteria;c__Alphaproteobacteria;o__Sphingomonadales;f__Sphingomonadaceae;g__Sphingomonas;s__Sphingomonas_wittichii	0.9565017991673981
ASV_1767	d__Bacteria;p__Firmicutes;c__Clostridia;o__Clostridiales;f__unclassified_Clostridiales;g__unclassified_Clostridiales;s__unclassified_Clostridiales	0.9998391241399944
ASV_1768	d__Bacteria;p__Proteobacteria;c__Gammaproteobacteria;o__Enterobacteriales;f__Enterobacteriaceae;g__Plesiomonas;s__unclassified_Plesiomonas	0.7310796982822088
ASV_1769	d__Bacteria;p__Proteobacteria;c__Gammaproteobacteria;o__Pseudomonadales;f__Moraxellaceae;g__unidentified_Moraxellaceae;s__unidentified_Moraxellaceae	0.9920661571739958
ASV_1770	d__Bacteria;p__Bacteroidetes;c__Bacteroidia;o__Bacteroidales;f__Rikenellaceae;g__Alistipes;s__unclassified_Alistipes	0.9500880021925006
ASV_1771	d__Bacteria;p__Bacteroidetes;c__Bacteroidia;o__Bacteroidales;f__Prevotellaceae;g__Prevotella;s__unidentified_Prevotella	0.9989092400456597
ASV_1772	d__Bacteria;p__Firmicutes;c__Bacilli;o__unclassified_Bacilli;f__unclassified_Bacilli;g__unclassified_Bacilli;s__unclassified_Bacilli	0.9996277265774607
ASV_1773	d__Bacteria;p__Firmicutes;c__Clostridia;o__Clostridiales;f__unidentified_Clostridiales;g__unidentified_Clostridiales;s__unidentified_Clostridiales	0.9264893815418153
ASV_1774	d__Bacteria;p__Firmicutes;c__Clostridia;o__Clostridiales;f__unidentified_Clostridiales;g__unidentified_Clostridiales;s__unidentified_Clostridiales	0.9997556382044724
ASV_1775	d__Bacteria;p__Proteobacteria;c__Betaproteobacteria;o__Burkholderiales;f__Comamonadaceae;g__Pelomonas;s__Pelomonas_puraquae	0.7969825267891287
ASV_1776	d__Bacteria;p__Firmicutes;c__Clostridia;o__Clostridiales;f__Christensenellaceae;g__unidentified_Christensenellaceae;s__unidentified_Christensenellaceae	0.9992627568968322
ASV_1777	d__Bacteria;p__Bacteroidetes;c__[Saprospirae];o__[Saprospirales];f__Chitinophagaceae;g__unidentified_Chitinophagaceae;s__unidentified_Chitinophagaceae	0.9975763955291492
ASV_1778	d__Bacteria;p__Proteobacteria;c__Alphaproteobacteria;o__Rhodospirillales;f__Acetobacteraceae;g__unidentified_Acetobacteraceae;s__unidentified_Acetobacteraceae	0.7434293087119348
ASV_1779	d__Bacteria;p__Proteobacteria;c__Gammaproteobacteria;o__Oceanospirillales;f__Halomonadaceae;g__unclassified_Halomonadaceae;s__unclassified_Halomonadaceae	0.7957345091996693
ASV_1780	d__Bacteria;p__Actinobacteria;c__Thermoleophilia;o__Gaiellales;f__Gaiellaceae;g__unidentified_Gaiellaceae;s__unidentified_Gaiellaceae	0.9994330501636681
ASV_1781	d__Bacteria;p__Firmicutes;c__Clostridia;o__Clostridiales;f__Lachnospiraceae;g__Clostridium;s__unclassified_Clostridium	0.8541370149121792
ASV_1782	d__Bacteria;p__Firmicutes;c__Clostridia;o__Clostridiales;f__Peptostreptococcaceae;g__unclassified_Peptostreptococcaceae;s__unclassified_Peptostreptococcaceae	0.8212549210779727
ASV_1783	d__Bacteria;p__Firmicutes;c__Clostridia;o__Clostridiales;f__Ruminococcaceae;g__unidentified_Ruminococcaceae;s__unidentified_Ruminococcaceae	0.9517593316358804
ASV_1784	d__Bacteria;p__Firmicutes;c__Clostridia;o__Clostridiales;f__unidentified_Clostridiales;g__unidentified_Clostridiales;s__unidentified_Clostridiales	0.9481435732503608
ASV_1785	d__Bacteria;p__Firmicutes;c__Clostridia;o__Clostridiales;f__unclassified_Clostridiales;g__unclassified_Clostridiales;s__unclassified_Clostridiales	0.999895613437921
ASV_1786	d__Bacteria;p__Firmicutes;c__Clostridia;o__Clostridiales;f__Ruminococcaceae;g__unidentified_Ruminococcaceae;s__unidentified_Ruminococcaceae	0.9934086234095527
ASV_1787	d__Bacteria;p__Firmicutes;c__Clostridia;o__Clostridiales;f__Lachnospiraceae;g__unidentified_Lachnospiraceae;s__unidentified_Lachnospiraceae	0.7216436584425514
ASV_1788	d__Bacteria;p__Proteobacteria;c__Betaproteobacteria;o__Burkholderiales;f__Oxalobacteraceae;g__unclassified_Oxalobacteraceae;s__unclassified_Oxalobacteraceae	0.9561748254209468
ASV_1789	d__Bacteria;p__Proteobacteria;c__Alphaproteobacteria;o__Caulobacterales;f__Caulobacteraceae;g__Caulobacter;s__Caulobacter_vibrioides	0.8840897167290109
ASV_1790	d__Bacteria;p__Firmicutes;c__Clostridia;o__Clostridiales;f__Ruminococcaceae;g__unidentified_Ruminococcaceae;s__unidentified_Ruminococcaceae	0.9954854842493479
ASV_1791	d__Bacteria;p__Firmicutes;c__Clostridia;o__Clostridiales;f__Ruminococcaceae;g__unidentified_Ruminococcaceae;s__unidentified_Ruminococcaceae	0.9921087762110692
ASV_1792	d__Bacteria;p__Firmicutes;c__Bacilli;o__Lactobacillales;f__Lactobacillaceae;g__Lactobacillus;s__unidentified_Lactobacillus	0.9997916748045027
ASV_1793	d__Bacteria;p__Firmicutes;c__Clostridia;o__Clostridiales;f__Ruminococcaceae;g__unidentified_Ruminococcaceae;s__unidentified_Ruminococcaceae	0.9985580592226182
ASV_1794	d__Bacteria;p__Proteobacteria;c__Alphaproteobacteria;o__Rhizobiales;f__unclassified_Rhizobiales;g__unclassified_Rhizobiales;s__unclassified_Rhizobiales	0.9986306460432108
ASV_1795	d__Bacteria;p__Bacteroidetes;c__unclassified_Bacteroidetes;o__unclassified_Bacteroidetes;f__unclassified_Bacteroidetes;g__unclassified_Bacteroidetes;s__unclassified_Bacteroidetes	0.9998462621623464
ASV_1796	d__Bacteria;p__Proteobacteria;c__Alphaproteobacteria;o__Rhizobiales;f__Beijerinckiaceae;g__unidentified_Beijerinckiaceae;s__unidentified_Beijerinckiaceae	0.911485798379476
ASV_1797	d__Bacteria;p__Proteobacteria;c__Betaproteobacteria;o__Burkholderiales;f__Burkholderiaceae;g__Burkholderia;s__Burkholderia_gladioli	0.7482934292625891
ASV_1798	d__Bacteria;p__Bacteroidetes;c__Bacteroidia;o__Bacteroidales;f__Rikenellaceae;g__Alistipes;s__unclassified_Alistipes	0.8876547677049447
ASV_1799	d__Bacteria;p__Firmicutes;c__Clostridia;o__Clostridiales;f__unidentified_Clostridiales;g__unidentified_Clostridiales;s__unidentified_Clostridiales	0.973505642351915
ASV_1800	d__Bacteria;p__unclassified_Bacteria;c__unclassified_Bacteria;o__unclassified_Bacteria;f__unclassified_Bacteria;g__unclassified_Bacteria;s__unclassified_Bacteria	0.99999999999045
ASV_1801	d__Bacteria;p__Proteobacteria;c__Alphaproteobacteria;o__Caulobacterales;f__Caulobacteraceae;g__Caulobacter;s__Caulobacter_vibrioides	0.9960288688896786
ASV_1802	d__Bacteria;p__Actinobacteria;c__Actinobacteria;o__Actinomycetales;f__Microbacteriaceae;g__unclassified_Microbacteriaceae;s__unclassified_Microbacteriaceae	0.988349100165332
ASV_1803	d__Bacteria;p__unidentified_Bacteria;c__unidentified_Bacteria;o__unidentified_Bacteria;f__unidentified_Bacteria;g__unidentified_Bacteria;s__unidentified_Bacteria	0.9776125659352881
ASV_1804	d__Bacteria;p__Bacteroidetes;c__Bacteroidia;o__Bacteroidales;f__unidentified_Bacteroidales;g__unidentified_Bacteroidales;s__unidentified_Bacteroidales	0.9999998527070029
ASV_1805	d__Bacteria;p__Actinobacteria;c__Actinobacteria;o__Actinomycetales;f__unclassified_Actinomycetales;g__unclassified_Actinomycetales;s__unclassified_Actinomycetales	0.9999948883706473
ASV_1806	d__Bacteria;p__Proteobacteria;c__Gammaproteobacteria;o__Pseudomonadales;f__Moraxellaceae;g__Enhydrobacter;s__Enhydrobacter_aerosaccus	0.7480384662755006
ASV_1807	d__Bacteria;p__Firmicutes;c__Clostridia;o__Clostridiales;f__Lachnospiraceae;g__unidentified_Lachnospiraceae;s__unidentified_Lachnospiraceae	0.7631781794769947
ASV_1808	d__Bacteria;p__Firmicutes;c__Bacilli;o__Lactobacillales;f__Lactobacillaceae;g__Lactobacillus;s__unclassified_Lactobacillus	0.9999992122408125
ASV_1809	d__Bacteria;p__Proteobacteria;c__Deltaproteobacteria;o__Syntrophobacterales;f__Syntrophobacteraceae;g__unidentified_Syntrophobacteraceae;s__unidentified_Syntrophobacteraceae	0.9507814845986815
ASV_1810	d__Bacteria;p__Proteobacteria;c__Betaproteobacteria;o__Burkholderiales;f__Burkholderiaceae;g__unclassified_Burkholderiaceae;s__unclassified_Burkholderiaceae	0.9969468791369089
ASV_1811	d__Bacteria;p__Firmicutes;c__Bacilli;o__Lactobacillales;f__Lactobacillaceae;g__Lactobacillus;s__unidentified_Lactobacillus	0.9387753269362057
ASV_1812	d__Bacteria;p__Firmicutes;c__Clostridia;o__Clostridiales;f__Lachnospiraceae;g__unidentified_Lachnospiraceae;s__unidentified_Lachnospiraceae	0.8261419334347857
ASV_1813	d__Bacteria;p__Bacteroidetes;c__Bacteroidia;o__Bacteroidales;f__Rikenellaceae;g__Alistipes;s__Alistipes_finegoldii	0.8742685812863505
ASV_1814	d__Bacteria;p__Bacteroidetes;c__Bacteroidia;o__Bacteroidales;f__Bacteroidaceae;g__Bacteroides;s__unidentified_Bacteroides	0.999997816273773
ASV_1815	d__Bacteria;p__Firmicutes;c__Clostridia;o__Clostridiales;f__Ruminococcaceae;g__Oscillospira;s__unidentified_Oscillospira	0.999626588150678
ASV_1816	d__Bacteria;p__unclassified_Bacteria;c__unclassified_Bacteria;o__unclassified_Bacteria;f__unclassified_Bacteria;g__unclassified_Bacteria;s__unclassified_Bacteria	0.999999999999893
ASV_1817	d__Bacteria;p__Firmicutes;c__Clostridia;o__Clostridiales;f__Ruminococcaceae;g__unidentified_Ruminococcaceae;s__unidentified_Ruminococcaceae	0.9590545833552647
ASV_1818	d__Bacteria;p__Actinobacteria;c__Thermoleophilia;o__Solirubrobacterales;f__Patulibacteraceae;g__unidentified_Patulibacteraceae;s__unidentified_Patulibacteraceae	0.9999970162214032
ASV_1819	d__Bacteria;p__Bacteroidetes;c__Bacteroidia;o__Bacteroidales;f__Bacteroidaceae;g__Bacteroides;s__unidentified_Bacteroides	0.9943077032822577
ASV_1820	d__Bacteria;p__Firmicutes;c__Clostridia;o__Clostridiales;f__unclassified_Clostridiales;g__unclassified_Clostridiales;s__unclassified_Clostridiales	0.9999953997769728
ASV_1821	d__Bacteria;p__Actinobacteria;c__Actinobacteria;o__Actinomycetales;f__unclassified_Actinomycetales;g__unclassified_Actinomycetales;s__unclassified_Actinomycetales	0.999852773432885
ASV_1822	d__Bacteria;p__Actinobacteria;c__Actinobacteria;o__Actinomycetales;f__Streptosporangiaceae;g__unclassified_Streptosporangiaceae;s__unclassified_Streptosporangiaceae	0.9182861631158573
ASV_1823	d__Bacteria;p__Proteobacteria;c__Gammaproteobacteria;o__Alteromonadales;f__Colwelliaceae;g__Colwellia;s__Colwellia_aestuarii	0.9597973592466741
ASV_1824	d__Bacteria;p__Firmicutes;c__Clostridia;o__Clostridiales;f__Clostridiaceae;g__unidentified_Clostridiaceae;s__unidentified_Clostridiaceae	0.8216682972811252
ASV_1825	d__Bacteria;p__Bacteroidetes;c__Bacteroidia;o__Bacteroidales;f__Porphyromonadaceae;g__Parabacteroides;s__unidentified_Parabacteroides	0.9998402665605799
ASV_1826	d__Bacteria;p__Bacteroidetes;c__Bacteroidia;o__Bacteroidales;f__Bacteroidaceae;g__Bacteroides;s__unidentified_Bacteroides	0.99975254467657
ASV_1827	d__Bacteria;p__unclassified_Bacteria;c__unclassified_Bacteria;o__unclassified_Bacteria;f__unclassified_Bacteria;g__unclassified_Bacteria;s__unclassified_Bacteria	0.9999999999834168
ASV_1828	d__Bacteria;p__Firmicutes;c__Clostridia;o__Clostridiales;f__Ruminococcaceae;g__Oscillospira;s__unidentified_Oscillospira	0.9992608091176473
ASV_1829	d__Bacteria;p__Actinobacteria;c__Thermoleophilia;o__Gaiellales;f__Gaiellaceae;g__unidentified_Gaiellaceae;s__unidentified_Gaiellaceae	0.999767141810909
ASV_1830	d__Bacteria;p__Proteobacteria;c__Gammaproteobacteria;o__Oceanospirillales;f__Oceanospirillaceae;g__unidentified_Oceanospirillaceae;s__unidentified_Oceanospirillaceae	0.7433402143466367
ASV_1831	d__Bacteria;p__Firmicutes;c__Clostridia;o__Clostridiales;f__Ruminococcaceae;g__Oscillospira;s__unidentified_Oscillospira	0.997216961769062
ASV_1832	d__Bacteria;p__Proteobacteria;c__Alphaproteobacteria;o__Rhizobiales;f__Hyphomicrobiaceae;g__Rhodoplanes;s__unidentified_Rhodoplanes	0.9995555814996014
ASV_1833	d__Bacteria;p__Proteobacteria;c__Betaproteobacteria;o__MND1;f__unidentified_MND1;g__unidentified_MND1;s__unidentified_MND1	0.9999741320554285
ASV_1834	d__Bacteria;p__Firmicutes;c__Bacilli;o__Turicibacterales;f__Turicibacteraceae;g__Turicibacter;s__unidentified_Turicibacter	0.9999998993007233
ASV_1835	d__Bacteria;p__unclassified_Bacteria;c__unclassified_Bacteria;o__unclassified_Bacteria;f__unclassified_Bacteria;g__unclassified_Bacteria;s__unclassified_Bacteria	0.9999999998267399
ASV_1836	d__Bacteria;p__Bacteroidetes;c__Bacteroidia;o__Bacteroidales;f__Prevotellaceae;g__unidentified_Prevotellaceae;s__unidentified_Prevotellaceae	0.8267239214013941
ASV_1837	d__Bacteria;p__Proteobacteria;c__Betaproteobacteria;o__Burkholderiales;f__Comamonadaceae;g__unclassified_Comamonadaceae;s__unclassified_Comamonadaceae	0.9626577058265318
ASV_1838	d__Bacteria;p__Firmicutes;c__Clostridia;o__Clostridiales;f__unclassified_Clostridiales;g__unclassified_Clostridiales;s__unclassified_Clostridiales	0.9999999997540059
ASV_1839	d__Bacteria;p__Bacteroidetes;c__Bacteroidia;o__Bacteroidales;f__Prevotellaceae;g__Prevotella;s__unidentified_Prevotella	0.9999557081847784
ASV_1840	d__Bacteria;p__Firmicutes;c__Clostridia;o__Clostridiales;f__unidentified_Clostridiales;g__unidentified_Clostridiales;s__unidentified_Clostridiales	0.8198082314900148
ASV_1841	d__Bacteria;p__Actinobacteria;c__Actinobacteria;o__Actinomycetales;f__unidentified_Actinomycetales;g__unidentified_Actinomycetales;s__unidentified_Actinomycetales	0.8272528824911931
ASV_1842	d__Bacteria;p__Firmicutes;c__Clostridia;o__Clostridiales;f__unidentified_Clostridiales;g__unidentified_Clostridiales;s__unidentified_Clostridiales	0.9865295606405123
ASV_1843	d__Bacteria;p__Verrucomicrobia;c__[Pedosphaerae];o__[Pedosphaerales];f__unidentified_[Pedosphaerales];g__unidentified_[Pedosphaerales];s__unidentified_[Pedosphaerales]	0.9995870617087526
ASV_1844	d__Bacteria;p__Proteobacteria;c__Gammaproteobacteria;o__Enterobacteriales;f__Enterobacteriaceae;g__unclassified_Enterobacteriaceae;s__unclassified_Enterobacteriaceae	0.9508032144247192
ASV_1845	d__Bacteria;p__Proteobacteria;c__Gammaproteobacteria;o__Pseudomonadales;f__Moraxellaceae;g__Acinetobacter;s__unidentified_Acinetobacter	0.9169199399325666
ASV_1846	d__Bacteria;p__Firmicutes;c__Clostridia;o__Clostridiales;f__Clostridiaceae;g__Clostridium;s__unclassified_Clostridium	0.8928492757396048
ASV_1847	d__Bacteria;p__Firmicutes;c__Clostridia;o__Clostridiales;f__Lachnospiraceae;g__unidentified_Lachnospiraceae;s__unidentified_Lachnospiraceae	0.7361804389645485
ASV_1848	d__Bacteria;p__Firmicutes;c__Clostridia;o__Clostridiales;f__unclassified_Clostridiales;g__unclassified_Clostridiales;s__unclassified_Clostridiales	0.8210387444695144
ASV_1849	d__Bacteria;p__WPS-2;c__unidentified_WPS-2;o__unidentified_WPS-2;f__unidentified_WPS-2;g__unidentified_WPS-2;s__unidentified_WPS-2	0.9999356149964536
ASV_1850	d__Bacteria;p__Proteobacteria;c__Betaproteobacteria;o__Burkholderiales;f__Comamonadaceae;g__unclassified_Comamonadaceae;s__unclassified_Comamonadaceae	0.8819470806939248
ASV_1851	d__Bacteria;p__Firmicutes;c__Clostridia;o__Clostridiales;f__unidentified_Clostridiales;g__unidentified_Clostridiales;s__unidentified_Clostridiales	0.7043038611767558
ASV_1852	d__Bacteria;p__Firmicutes;c__Bacilli;o__Bacillales;f__Paenibacillaceae;g__Cohnella;s__unidentified_Cohnella	0.9846779843272687
ASV_1853	d__Bacteria;p__Proteobacteria;c__Gammaproteobacteria;o__Pseudomonadales;f__Moraxellaceae;g__Acinetobacter;s__unidentified_Acinetobacter	0.9385670922856006
ASV_1854	d__Bacteria;p__Firmicutes;c__Clostridia;o__Clostridiales;f__Lachnospiraceae;g__unidentified_Lachnospiraceae;s__unidentified_Lachnospiraceae	0.8780934461992004
ASV_1855	d__Bacteria;p__Chloroflexi;c__Anaerolineae;o__Caldilineales;f__Caldilineaceae;g__unidentified_Caldilineaceae;s__unidentified_Caldilineaceae	0.9995501211694114
ASV_1856	d__Bacteria;p__Firmicutes;c__Erysipelotrichi;o__Erysipelotrichales;f__Erysipelotrichaceae;g__Allobaculum;s__unidentified_Allobaculum	0.9999989361689902
ASV_1857	d__Bacteria;p__Firmicutes;c__Clostridia;o__Clostridiales;f__[Mogibacteriaceae];g__unidentified_[Mogibacteriaceae];s__unidentified_[Mogibacteriaceae]	0.9943932564233475
ASV_1858	d__Bacteria;p__Firmicutes;c__Clostridia;o__Clostridiales;f__Clostridiaceae;g__unidentified_Clostridiaceae;s__unidentified_Clostridiaceae	0.9750829136179804
ASV_1859	d__Bacteria;p__Bacteroidetes;c__Bacteroidia;o__Bacteroidales;f__S24-7;g__unidentified_S24-7;s__unidentified_S24-7	0.9999972401635658
ASV_1860	d__Bacteria;p__Firmicutes;c__Clostridia;o__Clostridiales;f__Lachnospiraceae;g__unidentified_Lachnospiraceae;s__unidentified_Lachnospiraceae	0.8526979181864297
ASV_1861	d__Bacteria;p__Firmicutes;c__Clostridia;o__Clostridiales;f__Lachnospiraceae;g__unclassified_Lachnospiraceae;s__unclassified_Lachnospiraceae	0.9845341002087402
ASV_1862	d__Bacteria;p__Firmicutes;c__Clostridia;o__Clostridiales;f__Lachnospiraceae;g__unidentified_Lachnospiraceae;s__unidentified_Lachnospiraceae	0.9508913733035382
ASV_1863	d__Bacteria;p__Proteobacteria;c__Gammaproteobacteria;o__Pseudomonadales;f__Moraxellaceae;g__unidentified_Moraxellaceae;s__unidentified_Moraxellaceae	0.800317257025812
ASV_1864	d__Bacteria;p__Firmicutes;c__Clostridia;o__Clostridiales;f__Ruminococcaceae;g__unidentified_Ruminococcaceae;s__unidentified_Ruminococcaceae	0.9993628883015578
ASV_1865	d__Bacteria;p__Bacteroidetes;c__Bacteroidia;o__Bacteroidales;f__S24-7;g__unidentified_S24-7;s__unidentified_S24-7	0.9998651935301478
ASV_1866	d__Bacteria;p__Firmicutes;c__Clostridia;o__Clostridiales;f__Lachnospiraceae;g__Coprococcus;s__unidentified_Coprococcus	0.9962740540811226
ASV_1867	d__Bacteria;p__Firmicutes;c__Bacilli;o__Bacillales;f__Bacillaceae;g__unclassified_Bacillaceae;s__unclassified_Bacillaceae	0.9147922688293583
ASV_1868	d__Bacteria;p__Firmicutes;c__Clostridia;o__Clostridiales;f__Peptostreptococcaceae;g__unclassified_Peptostreptococcaceae;s__unclassified_Peptostreptococcaceae	0.7755627207547555
ASV_1869	d__Bacteria;p__Proteobacteria;c__Betaproteobacteria;o__SC-I-84;f__unidentified_SC-I-84;g__unidentified_SC-I-84;s__unidentified_SC-I-84	0.9999867271749908
ASV_1870	d__Bacteria;p__Bacteroidetes;c__Bacteroidia;o__Bacteroidales;f__unidentified_Bacteroidales;g__unidentified_Bacteroidales;s__unidentified_Bacteroidales	0.9604477873018623
ASV_1871	d__Bacteria;p__Bacteroidetes;c__Bacteroidia;o__Bacteroidales;f__S24-7;g__unidentified_S24-7;s__unidentified_S24-7	0.9961653309422125
ASV_1872	d__Bacteria;p__Actinobacteria;c__Thermoleophilia;o__Gaiellales;f__Gaiellaceae;g__unidentified_Gaiellaceae;s__unidentified_Gaiellaceae	0.8839245693850443
ASV_1873	d__Bacteria;p__Firmicutes;c__Clostridia;o__Clostridiales;f__unidentified_Clostridiales;g__unidentified_Clostridiales;s__unidentified_Clostridiales	0.971900242231387
ASV_1874	d__Bacteria;p__Firmicutes;c__Clostridia;o__Clostridiales;f__unidentified_Clostridiales;g__unidentified_Clostridiales;s__unidentified_Clostridiales	0.9329558478751075
ASV_1875	d__Bacteria;p__Proteobacteria;c__Betaproteobacteria;o__Nitrosomonadales;f__Nitrosomonadaceae;g__unclassified_Nitrosomonadaceae;s__unclassified_Nitrosomonadaceae	0.9998605359565987
ASV_1876	d__Bacteria;p__Acidobacteria;c__Solibacteres;o__Solibacterales;f__unidentified_Solibacterales;g__unidentified_Solibacterales;s__unidentified_Solibacterales	0.9997840738997352
ASV_1877	d__Bacteria;p__Firmicutes;c__Clostridia;o__Clostridiales;f__unidentified_Clostridiales;g__unidentified_Clostridiales;s__unidentified_Clostridiales	0.9774764729846783
ASV_1878	d__Bacteria;p__Firmicutes;c__Clostridia;o__Clostridiales;f__Ruminococcaceae;g__Oscillospira;s__unidentified_Oscillospira	0.9997508769205594
ASV_1879	d__Bacteria;p__Tenericutes;c__RF3;o__ML615J-28;f__unidentified_ML615J-28;g__unidentified_ML615J-28;s__unidentified_ML615J-28	0.999973151101295
ASV_1880	d__Bacteria;p__Firmicutes;c__Clostridia;o__Clostridiales;f__Ruminococcaceae;g__unidentified_Ruminococcaceae;s__unidentified_Ruminococcaceae	0.996658876140936
ASV_1881	d__Bacteria;p__Bacteroidetes;c__Bacteroidia;o__Bacteroidales;f__Bacteroidaceae;g__Bacteroides;s__unidentified_Bacteroides	0.9999996328724697
ASV_1882	d__Bacteria;p__Proteobacteria;c__Betaproteobacteria;o__Burkholderiales;f__Comamonadaceae;g__unclassified_Comamonadaceae;s__unclassified_Comamonadaceae	0.9957353223106206
ASV_1883	d__Bacteria;p__Actinobacteria;c__Actinobacteria;o__Actinomycetales;f__unclassified_Actinomycetales;g__unclassified_Actinomycetales;s__unclassified_Actinomycetales	0.9999998331828077
ASV_1884	d__Bacteria;p__unidentified_Bacteria;c__unidentified_Bacteria;o__unidentified_Bacteria;f__unidentified_Bacteria;g__unidentified_Bacteria;s__unidentified_Bacteria	0.9822684699359993
ASV_1885	d__Bacteria;p__Firmicutes;c__Clostridia;o__Clostridiales;f__unclassified_Clostridiales;g__unclassified_Clostridiales;s__unclassified_Clostridiales	0.9999999104865197
ASV_1886	d__Bacteria;p__Firmicutes;c__Clostridia;o__Clostridiales;f__Lachnospiraceae;g__unidentified_Lachnospiraceae;s__unidentified_Lachnospiraceae	0.9361644447565597
ASV_1887	d__Bacteria;p__Bacteroidetes;c__Bacteroidia;o__Bacteroidales;f__S24-7;g__unidentified_S24-7;s__unidentified_S24-7	0.9999980989541535
ASV_1888	d__Bacteria;p__Firmicutes;c__Clostridia;o__Clostridiales;f__Lachnospiraceae;g__unidentified_Lachnospiraceae;s__unidentified_Lachnospiraceae	0.9531378934061309
ASV_1889	d__Bacteria;p__Bacteroidetes;c__Bacteroidia;o__Bacteroidales;f__S24-7;g__unidentified_S24-7;s__unidentified_S24-7	0.8060053653382561
ASV_1890	d__Bacteria;p__Firmicutes;c__Clostridia;o__Clostridiales;f__unidentified_Clostridiales;g__unidentified_Clostridiales;s__unidentified_Clostridiales	0.9909924400478811
ASV_1891	d__Bacteria;p__Firmicutes;c__Clostridia;o__Clostridiales;f__Ruminococcaceae;g__unidentified_Ruminococcaceae;s__unidentified_Ruminococcaceae	0.9937272933572019
ASV_1892	d__Bacteria;p__Firmicutes;c__Bacilli;o__Lactobacillales;f__Lactobacillaceae;g__Lactobacillus;s__unclassified_Lactobacillus	0.7156426018130333
ASV_1893	d__Bacteria;p__Firmicutes;c__Clostridia;o__Clostridiales;f__Lachnospiraceae;g__unclassified_Lachnospiraceae;s__unclassified_Lachnospiraceae	0.9662004479023578
ASV_1894	d__Bacteria;p__Bacteroidetes;c__Bacteroidia;o__Bacteroidales;f__S24-7;g__unidentified_S24-7;s__unidentified_S24-7	0.99997028674821
ASV_1895	d__Bacteria;p__Bacteroidetes;c__Bacteroidia;o__Bacteroidales;f__S24-7;g__unidentified_S24-7;s__unidentified_S24-7	0.9972141971116089
ASV_1896	d__Bacteria;p__Firmicutes;c__Clostridia;o__Clostridiales;f__unidentified_Clostridiales;g__unidentified_Clostridiales;s__unidentified_Clostridiales	0.9791156341684633
ASV_1897	d__Bacteria;p__Bacteroidetes;c__Bacteroidia;o__Bacteroidales;f__S24-7;g__unidentified_S24-7;s__unidentified_S24-7	0.81409601119657
ASV_1898	d__Bacteria;p__Firmicutes;c__Clostridia;o__Clostridiales;f__Ruminococcaceae;g__Faecalibacterium;s__Faecalibacterium_prausnitzii	0.9990893738003299
ASV_1899	d__Bacteria;p__unclassified_Bacteria;c__unclassified_Bacteria;o__unclassified_Bacteria;f__unclassified_Bacteria;g__unclassified_Bacteria;s__unclassified_Bacteria	0.9999999998544145
ASV_1900	d__Bacteria;p__Firmicutes;c__Clostridia;o__Clostridiales;f__Lachnospiraceae;g__unclassified_Lachnospiraceae;s__unclassified_Lachnospiraceae	0.9839251194355211
ASV_1901	d__Bacteria;p__Proteobacteria;c__Alphaproteobacteria;o__unclassified_Alphaproteobacteria;f__unclassified_Alphaproteobacteria;g__unclassified_Alphaproteobacteria;s__unclassified_Alphaproteobacteria	0.9359589212266657
ASV_1902	d__Bacteria;p__Proteobacteria;c__Betaproteobacteria;o__Burkholderiales;f__Comamonadaceae;g__unclassified_Comamonadaceae;s__unclassified_Comamonadaceae	0.9987239321760918
ASV_1903	d__Bacteria;p__Firmicutes;c__Clostridia;o__Clostridiales;f__Lachnospiraceae;g__Anaerostipes;s__unidentified_Anaerostipes	0.9978896193610437
ASV_1904	d__Bacteria;p__Firmicutes;c__Bacilli;o__Bacillales;f__Bacillaceae;g__unclassified_Bacillaceae;s__unclassified_Bacillaceae	0.729254594068034
ASV_1905	d__Bacteria;p__Firmicutes;c__Clostridia;o__Clostridiales;f__Ruminococcaceae;g__Oscillospira;s__unidentified_Oscillospira	0.9783347553350524
ASV_1906	d__Bacteria;p__Firmicutes;c__Bacilli;o__Bacillales;f__unclassified_Bacillales;g__unclassified_Bacillales;s__unclassified_Bacillales	0.9977729990658826
ASV_1907	d__Bacteria;p__Bacteroidetes;c__[Saprospirae];o__[Saprospirales];f__Chitinophagaceae;g__Flavisolibacter;s__unidentified_Flavisolibacter	0.9901527047989347
ASV_1908	d__Bacteria;p__Firmicutes;c__Erysipelotrichi;o__Erysipelotrichales;f__Erysipelotrichaceae;g__Clostridium;s__Clostridium_ramosum	0.9398250513129338
ASV_1909	d__Bacteria;p__Firmicutes;c__Clostridia;o__Clostridiales;f__Christensenellaceae;g__unidentified_Christensenellaceae;s__unidentified_Christensenellaceae	0.8573695650638423
ASV_1910	d__Bacteria;p__Firmicutes;c__Clostridia;o__Clostridiales;f__Ruminococcaceae;g__Oscillospira;s__unidentified_Oscillospira	0.9972807103012831
ASV_1911	d__Bacteria;p__Firmicutes;c__Clostridia;o__Clostridiales;f__Lachnospiraceae;g__unclassified_Lachnospiraceae;s__unclassified_Lachnospiraceae	0.8044465212235248
ASV_1912	d__Bacteria;p__Proteobacteria;c__Alphaproteobacteria;o__Rhizobiales;f__Phyllobacteriaceae;g__unclassified_Phyllobacteriaceae;s__unclassified_Phyllobacteriaceae	0.9989738355892555
ASV_1913	d__Bacteria;p__Firmicutes;c__Clostridia;o__Clostridiales;f__Christensenellaceae;g__unidentified_Christensenellaceae;s__unidentified_Christensenellaceae	0.7340551973280648
ASV_1914	d__Bacteria;p__Proteobacteria;c__Gammaproteobacteria;o__Enterobacteriales;f__Enterobacteriaceae;g__unclassified_Enterobacteriaceae;s__unclassified_Enterobacteriaceae	0.9616813520094751
ASV_1915	d__Bacteria;p__Proteobacteria;c__Alphaproteobacteria;o__Rhodospirillales;f__Rhodospirillaceae;g__unidentified_Rhodospirillaceae;s__unidentified_Rhodospirillaceae	0.9989934021396969
ASV_1916	d__Bacteria;p__Firmicutes;c__Clostridia;o__Clostridiales;f__unidentified_Clostridiales;g__unidentified_Clostridiales;s__unidentified_Clostridiales	0.996184199554304
ASV_1917	d__Bacteria;p__Proteobacteria;c__Gammaproteobacteria;o__Xanthomonadales;f__Sinobacteraceae;g__unidentified_Sinobacteraceae;s__unidentified_Sinobacteraceae	0.9994228716771767
ASV_1918	d__Bacteria;p__Firmicutes;c__Bacilli;o__Bacillales;f__Alicyclobacillaceae;g__Alicyclobacillus;s__unidentified_Alicyclobacillus	0.9999999983069472
ASV_1919	d__Bacteria;p__Firmicutes;c__Bacilli;o__Turicibacterales;f__Turicibacteraceae;g__Turicibacter;s__unidentified_Turicibacter	0.999999608140334
ASV_1920	d__Bacteria;p__unclassified_Bacteria;c__unclassified_Bacteria;o__unclassified_Bacteria;f__unclassified_Bacteria;g__unclassified_Bacteria;s__unclassified_Bacteria	0.999999999998023
ASV_1921	d__Bacteria;p__Firmicutes;c__Clostridia;o__Clostridiales;f__Lachnospiraceae;g__Coprococcus;s__unidentified_Coprococcus	0.9958905082380944
ASV_1922	d__Bacteria;p__Proteobacteria;c__Deltaproteobacteria;o__Myxococcales;f__unidentified_Myxococcales;g__unidentified_Myxococcales;s__unidentified_Myxococcales	0.9999563114802171
ASV_1923	d__Bacteria;p__Proteobacteria;c__Alphaproteobacteria;o__Caulobacterales;f__Caulobacteraceae;g__Caulobacter;s__Caulobacter_vibrioides	0.9978655304051244
ASV_1924	d__Bacteria;p__Proteobacteria;c__Alphaproteobacteria;o__Rhizobiales;f__Beijerinckiaceae;g__unclassified_Beijerinckiaceae;s__unclassified_Beijerinckiaceae	0.8017230895317734
ASV_1925	d__Bacteria;p__Firmicutes;c__Clostridia;o__Clostridiales;f__unidentified_Clostridiales;g__unidentified_Clostridiales;s__unidentified_Clostridiales	0.9920302105683497
ASV_1926	d__Bacteria;p__Bacteroidetes;c__Bacteroidia;o__Bacteroidales;f__S24-7;g__unidentified_S24-7;s__unidentified_S24-7	0.9999999651143702
ASV_1927	d__Bacteria;p__Firmicutes;c__Clostridia;o__Clostridiales;f__Lachnospiraceae;g__Clostridium;s__Clostridium_symbiosum	0.9943667481492595
ASV_1928	d__Bacteria;p__Bacteroidetes;c__Bacteroidia;o__Bacteroidales;f__unidentified_Bacteroidales;g__unidentified_Bacteroidales;s__unidentified_Bacteroidales	0.9826495444885874
ASV_1929	d__Bacteria;p__Proteobacteria;c__Betaproteobacteria;o__Burkholderiales;f__Comamonadaceae;g__Acidovorax;s__Acidovorax_radicis	0.7187314567798725
ASV_1930	d__Bacteria;p__Proteobacteria;c__Gammaproteobacteria;o__Enterobacteriales;f__Enterobacteriaceae;g__unclassified_Enterobacteriaceae;s__unclassified_Enterobacteriaceae	0.93213695140213
ASV_1931	d__Bacteria;p__Proteobacteria;c__Gammaproteobacteria;o__Xanthomonadales;f__Xanthomonadaceae;g__unclassified_Xanthomonadaceae;s__unclassified_Xanthomonadaceae	0.7701847857531543
ASV_1932	d__Bacteria;p__Proteobacteria;c__Gammaproteobacteria;o__Xanthomonadales;f__Xanthomonadaceae;g__unclassified_Xanthomonadaceae;s__unclassified_Xanthomonadaceae	0.9943590264080284
ASV_1933	d__Bacteria;p__Bacteroidetes;c__Bacteroidia;o__Bacteroidales;f__S24-7;g__unidentified_S24-7;s__unidentified_S24-7	0.9999993564342243
ASV_1934	d__Bacteria;p__Proteobacteria;c__Epsilonproteobacteria;o__Campylobacterales;f__Campylobacteraceae;g__Campylobacter;s__unidentified_Campylobacter	0.9720736357250119
ASV_1935	d__Bacteria;p__Actinobacteria;c__Actinobacteria;o__Actinomycetales;f__Geodermatophilaceae;g__unidentified_Geodermatophilaceae;s__unidentified_Geodermatophilaceae	0.8371427637641207
ASV_1936	d__Bacteria;p__Proteobacteria;c__Alphaproteobacteria;o__Rhizobiales;f__Hyphomicrobiaceae;g__Rhodoplanes;s__unidentified_Rhodoplanes	0.990219933837139
ASV_1937	d__Bacteria;p__Proteobacteria;c__Gammaproteobacteria;o__Aeromonadales;f__Aeromonadaceae;g__Aeromonas;s__unclassified_Aeromonas	0.9806781318873009
ASV_1938	d__Bacteria;p__Firmicutes;c__Bacilli;o__Lactobacillales;f__unclassified_Lactobacillales;g__unclassified_Lactobacillales;s__unclassified_Lactobacillales	0.9551506549898827
ASV_1939	d__Bacteria;p__Firmicutes;c__Clostridia;o__Clostridiales;f__unidentified_Clostridiales;g__unidentified_Clostridiales;s__unidentified_Clostridiales	0.86956563313259
ASV_1940	d__Bacteria;p__Proteobacteria;c__Alphaproteobacteria;o__Rhodospirillales;f__Rhodospirillaceae;g__unidentified_Rhodospirillaceae;s__unidentified_Rhodospirillaceae	0.9883144567872073
ASV_1941	d__Bacteria;p__Proteobacteria;c__Gammaproteobacteria;o__Pseudomonadales;f__Moraxellaceae;g__Acinetobacter;s__unidentified_Acinetobacter	0.9954341866998783
ASV_1942	d__Bacteria;p__Firmicutes;c__Clostridia;o__Clostridiales;f__unidentified_Clostridiales;g__unidentified_Clostridiales;s__unidentified_Clostridiales	0.8713431830483813
ASV_1943	d__Bacteria;p__Firmicutes;c__Clostridia;o__Clostridiales;f__Ruminococcaceae;g__unidentified_Ruminococcaceae;s__unidentified_Ruminococcaceae	0.9945430369030351
ASV_1944	d__Bacteria;p__Firmicutes;c__Clostridia;o__Clostridiales;f__unidentified_Clostridiales;g__unidentified_Clostridiales;s__unidentified_Clostridiales	0.9254716419726647
ASV_1945	d__Bacteria;p__Proteobacteria;c__Deltaproteobacteria;o__Desulfobacterales;f__Desulfobulbaceae;g__unclassified_Desulfobulbaceae;s__unclassified_Desulfobulbaceae	0.7484887354376861
ASV_1946	d__Bacteria;p__Proteobacteria;c__Betaproteobacteria;o__Burkholderiales;f__Comamonadaceae;g__Pelomonas;s__unclassified_Pelomonas	0.9017433505767901
ASV_1947	d__Bacteria;p__Bacteroidetes;c__Bacteroidia;o__Bacteroidales;f__S24-7;g__unidentified_S24-7;s__unidentified_S24-7	0.993509220165893
ASV_1948	d__Bacteria;p__Firmicutes;c__Clostridia;o__Clostridiales;f__Ruminococcaceae;g__unidentified_Ruminococcaceae;s__unidentified_Ruminococcaceae	0.97947357972822
ASV_1949	d__Bacteria;p__Firmicutes;c__Clostridia;o__Clostridiales;f__unidentified_Clostridiales;g__unidentified_Clostridiales;s__unidentified_Clostridiales	0.9999823680585456
ASV_1950	d__Bacteria;p__Firmicutes;c__Clostridia;o__Clostridiales;f__unclassified_Clostridiales;g__unclassified_Clostridiales;s__unclassified_Clostridiales	0.9271561854016797
ASV_1951	d__Bacteria;p__Proteobacteria;c__Gammaproteobacteria;o__Enterobacteriales;f__Enterobacteriaceae;g__unclassified_Enterobacteriaceae;s__unclassified_Enterobacteriaceae	0.9999999507865585
ASV_1952	d__Bacteria;p__Firmicutes;c__Clostridia;o__Clostridiales;f__unclassified_Clostridiales;g__unclassified_Clostridiales;s__unclassified_Clostridiales	0.9999999997510823
ASV_1953	d__Bacteria;p__Firmicutes;c__Clostridia;o__Clostridiales;f__unidentified_Clostridiales;g__unidentified_Clostridiales;s__unidentified_Clostridiales	0.9058186324306503
ASV_1954	d__Bacteria;p__Firmicutes;c__Clostridia;o__Clostridiales;f__Ruminococcaceae;g__unidentified_Ruminococcaceae;s__unidentified_Ruminococcaceae	0.8633886289113786
ASV_1955	d__Bacteria;p__Actinobacteria;c__Actinobacteria;o__Actinomycetales;f__Microbacteriaceae;g__Cryocola;s__unidentified_Cryocola	0.792992750810084
ASV_1956	d__Bacteria;p__Tenericutes;c__Mollicutes;o__RF39;f__unidentified_RF39;g__unidentified_RF39;s__unidentified_RF39	0.9884650952337783
ASV_1957	d__Bacteria;p__Firmicutes;c__Bacilli;o__Bacillales;f__Bacillaceae;g__unclassified_Bacillaceae;s__unclassified_Bacillaceae	0.8893352648824641
ASV_1958	d__Bacteria;p__Firmicutes;c__Clostridia;o__Clostridiales;f__Ruminococcaceae;g__Oscillospira;s__unidentified_Oscillospira	0.9995312112622561
ASV_1959	d__Bacteria;p__Bacteroidetes;c__Bacteroidia;o__Bacteroidales;f__S24-7;g__unidentified_S24-7;s__unidentified_S24-7	0.9999967438514126
ASV_1960	d__Bacteria;p__Firmicutes;c__Clostridia;o__Clostridiales;f__Ruminococcaceae;g__unidentified_Ruminococcaceae;s__unidentified_Ruminococcaceae	0.9955070424174475
ASV_1961	d__Bacteria;p__Firmicutes;c__Clostridia;o__Clostridiales;f__unclassified_Clostridiales;g__unclassified_Clostridiales;s__unclassified_Clostridiales	0.9999991887780115
ASV_1962	d__Bacteria;p__Proteobacteria;c__Alphaproteobacteria;o__Rhodospirillales;f__Rhodospirillaceae;g__unidentified_Rhodospirillaceae;s__unidentified_Rhodospirillaceae	0.9888783751324659
ASV_1963	d__Bacteria;p__Firmicutes;c__Clostridia;o__Clostridiales;f__Peptococcaceae;g__rc4-4;s__unidentified_rc4-4	0.9757975945824646
ASV_1964	d__Bacteria;p__Firmicutes;c__Clostridia;o__Clostridiales;f__Ruminococcaceae;g__unidentified_Ruminococcaceae;s__unidentified_Ruminococcaceae	0.98991055437014
ASV_1965	d__Bacteria;p__Firmicutes;c__Clostridia;o__Clostridiales;f__Ruminococcaceae;g__Ruminococcus;s__unidentified_Ruminococcus	0.8524924598419805
ASV_1966	d__Bacteria;p__Acidobacteria;c__Acidobacteria-6;o__iii1-15;f__unidentified_iii1-15;g__unidentified_iii1-15;s__unidentified_iii1-15	0.9999700006118996
ASV_1967	d__Bacteria;p__Bacteroidetes;c__Bacteroidia;o__Bacteroidales;f__S24-7;g__unidentified_S24-7;s__unidentified_S24-7	0.9999796879588208
ASV_1968	d__Bacteria;p__Firmicutes;c__Clostridia;o__Clostridiales;f__Lachnospiraceae;g__unidentified_Lachnospiraceae;s__unidentified_Lachnospiraceae	0.7126065080926646
ASV_1969	d__Bacteria;p__Firmicutes;c__Clostridia;o__Clostridiales;f__Christensenellaceae;g__unidentified_Christensenellaceae;s__unidentified_Christensenellaceae	0.9925234817587666
ASV_1970	d__Bacteria;p__Proteobacteria;c__Alphaproteobacteria;o__unidentified_Alphaproteobacteria;f__unidentified_Alphaproteobacteria;g__unidentified_Alphaproteobacteria;s__unidentified_Alphaproteobacteria	0.7283223878813992
ASV_1971	d__Bacteria;p__Proteobacteria;c__Gammaproteobacteria;o__Pseudomonadales;f__Pseudomonadaceae;g__unidentified_Pseudomonadaceae;s__unidentified_Pseudomonadaceae	0.8208068239879646
ASV_1972	d__Bacteria;p__Firmicutes;c__Clostridia;o__Clostridiales;f__unclassified_Clostridiales;g__unclassified_Clostridiales;s__unclassified_Clostridiales	0.9999705768444247
ASV_1973	d__Bacteria;p__Proteobacteria;c__Gammaproteobacteria;o__Enterobacteriales;f__Enterobacteriaceae;g__Shigella;s__unclassified_Shigella	0.7293733314241845
ASV_1974	d__Bacteria;p__Firmicutes;c__Clostridia;o__Clostridiales;f__Lachnospiraceae;g__Dorea;s__unidentified_Dorea	0.7082547006175011
ASV_1975	d__Bacteria;p__Firmicutes;c__Clostridia;o__Clostridiales;f__Ruminococcaceae;g__Oscillospira;s__unidentified_Oscillospira	0.9997812607295707
ASV_1976	d__Bacteria;p__Proteobacteria;c__Alphaproteobacteria;o__Rhizobiales;f__Hyphomicrobiaceae;g__Rhodoplanes;s__unidentified_Rhodoplanes	0.9676903562700578
ASV_1977	d__Bacteria;p__Proteobacteria;c__Alphaproteobacteria;o__unclassified_Alphaproteobacteria;f__unclassified_Alphaproteobacteria;g__unclassified_Alphaproteobacteria;s__unclassified_Alphaproteobacteria	0.9967013402914512
ASV_1978	d__Bacteria;p__Firmicutes;c__Clostridia;o__Clostridiales;f__Peptostreptococcaceae;g__unclassified_Peptostreptococcaceae;s__unclassified_Peptostreptococcaceae	0.9819062333594406
ASV_1979	d__Bacteria;p__Bacteroidetes;c__Bacteroidia;o__Bacteroidales;f__Rikenellaceae;g__Alistipes;s__Alistipes_indistinctus	0.9999994385051578
ASV_1980	d__Bacteria;p__Acidobacteria;c__Acidobacteriia;o__Acidobacteriales;f__Koribacteraceae;g__Candidatus_Koribacter;s__unidentified_Candidatus_Koribacter	0.9595555502989556
ASV_1981	d__Bacteria;p__Firmicutes;c__Bacilli;o__Bacillales;f__Bacillaceae;g__Bacillus;s__unidentified_Bacillus	0.8226278587040492
ASV_1982	d__Bacteria;p__Proteobacteria;c__Alphaproteobacteria;o__Rhizobiales;f__unclassified_Rhizobiales;g__unclassified_Rhizobiales;s__unclassified_Rhizobiales	0.9705469279137175
ASV_1983	d__Bacteria;p__Firmicutes;c__Clostridia;o__Clostridiales;f__Peptostreptococcaceae;g__Clostridium;s__Clostridium_ruminantium	0.9259584944067137
ASV_1984	d__Bacteria;p__Firmicutes;c__Clostridia;o__Clostridiales;f__Ruminococcaceae;g__unidentified_Ruminococcaceae;s__unidentified_Ruminococcaceae	0.988377970694619
ASV_1985	d__Bacteria;p__Firmicutes;c__Clostridia;o__Clostridiales;f__Dehalobacteriaceae;g__unidentified_Dehalobacteriaceae;s__unidentified_Dehalobacteriaceae	0.9999994506185689
ASV_1986	d__Bacteria;p__Firmicutes;c__Bacilli;o__Lactobacillales;f__Lactobacillaceae;g__Lactobacillus;s__unclassified_Lactobacillus	0.955470178307529
ASV_1987	d__Bacteria;p__Firmicutes;c__Clostridia;o__Clostridiales;f__Ruminococcaceae;g__unidentified_Ruminococcaceae;s__unidentified_Ruminococcaceae	0.9463111298576962
ASV_1988	d__Bacteria;p__Firmicutes;c__Clostridia;o__Clostridiales;f__Ruminococcaceae;g__Ruminococcus;s__unidentified_Ruminococcus	0.9999752938381433
ASV_1989	d__Bacteria;p__Firmicutes;c__Clostridia;o__Clostridiales;f__Lachnospiraceae;g__unclassified_Lachnospiraceae;s__unclassified_Lachnospiraceae	0.721625297678835
ASV_1990	d__Bacteria;p__Actinobacteria;c__Actinobacteria;o__Actinomycetales;f__unclassified_Actinomycetales;g__unclassified_Actinomycetales;s__unclassified_Actinomycetales	0.8345390797952925
ASV_1991	d__Bacteria;p__Firmicutes;c__Clostridia;o__Clostridiales;f__Ruminococcaceae;g__unidentified_Ruminococcaceae;s__unidentified_Ruminococcaceae	0.9947470319093372
ASV_1992	d__Bacteria;p__Firmicutes;c__Clostridia;o__Clostridiales;f__Ruminococcaceae;g__unidentified_Ruminococcaceae;s__unidentified_Ruminococcaceae	0.9464006829160423
ASV_1993	d__Bacteria;p__Bacteroidetes;c__Bacteroidia;o__Bacteroidales;f__[Paraprevotellaceae];g__[Prevotella];s__unidentified_[Prevotella]	0.999778182316926
ASV_1994	d__Bacteria;p__Firmicutes;c__Clostridia;o__Clostridiales;f__Lachnospiraceae;g__unclassified_Lachnospiraceae;s__unclassified_Lachnospiraceae	0.9990999222726403
ASV_1995	d__Bacteria;p__Firmicutes;c__Clostridia;o__Clostridiales;f__Peptostreptococcaceae;g__unidentified_Peptostreptococcaceae;s__unidentified_Peptostreptococcaceae	0.8496148194640597
ASV_1996	d__Bacteria;p__Tenericutes;c__Mollicutes;o__RsaHF231;f__unidentified_RsaHF231;g__unidentified_RsaHF231;s__unidentified_RsaHF231	0.9999847086303518
ASV_1997	d__Bacteria;p__Firmicutes;c__Clostridia;o__Clostridiales;f__[Mogibacteriaceae];g__unidentified_[Mogibacteriaceae];s__unidentified_[Mogibacteriaceae]	0.9993226791168685
ASV_1998	d__Bacteria;p__Actinobacteria;c__Actinobacteria;o__Actinomycetales;f__Geodermatophilaceae;g__Blastococcus;s__unclassified_Blastococcus	0.8414564672969842
ASV_1999	d__Bacteria;p__Actinobacteria;c__Actinobacteria;o__Actinomycetales;f__Micromonosporaceae;g__Micromonospora;s__unclassified_Micromonospora	0.8255031847782469
[truncated: 24,475 more rows]
