# Supplementary material for: Modulation of the gut microbiota by processed food and natural food: evidence from the Siniperca chuatsi microbiome
Source: PeerJ journal article supplement (doi:10.7717/peerj.17520), 2024-06-14
Supplement: RawData.7z [file taxonomy_filtered.xls]

#Feature ID	taxonomy	Confidence
ASV_24553	d__Bacteria;p__Proteobacteria;c__Gammaproteobacteria;o__Enterobacteriales;f__Enterobacteriaceae;g__unclassified_Enterobacteriaceae;s__unclassified_Enterobacteriaceae	0.9999999927668437
ASV_17591	d__Bacteria;p__Proteobacteria;c__Gammaproteobacteria;o__Enterobacteriales;f__Enterobacteriaceae;g__unclassified_Enterobacteriaceae;s__unclassified_Enterobacteriaceae	0.9999999949971657
ASV_2846	d__Bacteria;p__Proteobacteria;c__Betaproteobacteria;o__Burkholderiales;f__Comamonadaceae;g__Aquabacterium;s__unidentified_Aquabacterium	0.9823942861109064
ASV_23310	d__Bacteria;p__Proteobacteria;c__Alphaproteobacteria;o__Rhizobiales;f__Bradyrhizobiaceae;g__unclassified_Bradyrhizobiaceae;s__unclassified_Bradyrhizobiaceae	0.9999799647464558
ASV_19142	d__Bacteria;p__Proteobacteria;c__Gammaproteobacteria;o__Pseudomonadales;f__Pseudomonadaceae;g__Pseudomonas;s__unclassified_Pseudomonas	0.9937042912914577
ASV_21352	d__Bacteria;p__Firmicutes;c__Bacilli;o__Lactobacillales;f__Lactobacillaceae;g__Lactobacillus;s__unidentified_Lactobacillus	0.9999579056874102
ASV_23583	d__Bacteria;p__Proteobacteria;c__Gammaproteobacteria;o__Enterobacteriales;f__Enterobacteriaceae;g__unclassified_Enterobacteriaceae;s__unclassified_Enterobacteriaceae	0.9999987564801599
ASV_6438	d__Bacteria;p__Firmicutes;c__Bacilli;o__Lactobacillales;f__Lactobacillaceae;g__Lactobacillus;s__Lactobacillus_manihotivorans	0.7321864087039249
ASV_7520	d__Bacteria;p__Fusobacteria;c__Fusobacteriia;o__Fusobacteriales;f__Fusobacteriaceae;g__Cetobacterium;s__Cetobacterium_somerae	0.9329172052682945
ASV_4011	d__Bacteria;p__Firmicutes;c__Clostridia;o__Clostridiales;f__Clostridiaceae;g__unidentified_Clostridiaceae;s__unidentified_Clostridiaceae	0.9503958324280953
ASV_12318	d__Bacteria;p__Firmicutes;c__Bacilli;o__Lactobacillales;f__Lactobacillaceae;g__Lactobacillus;s__Lactobacillus_hamsteri	0.7736502002464463
ASV_6450	d__Bacteria;p__Firmicutes;c__Bacilli;o__Lactobacillales;f__Lactobacillaceae;g__Lactobacillus;s__unclassified_Lactobacillus	0.9997778557543865
ASV_3649	d__Bacteria;p__Proteobacteria;c__Gammaproteobacteria;o__Pseudomonadales;f__Pseudomonadaceae;g__Pseudomonas;s__Pseudomonas_fragi	0.8437144962036603
ASV_23612	d__Bacteria;p__Proteobacteria;c__Gammaproteobacteria;o__Enterobacteriales;f__Enterobacteriaceae;g__unclassified_Enterobacteriaceae;s__unclassified_Enterobacteriaceae	0.9999770215927769
ASV_8507	d__Bacteria;p__Firmicutes;c__Clostridia;o__Clostridiales;f__unidentified_Clostridiales;g__unidentified_Clostridiales;s__unidentified_Clostridiales	0.9996896527105374
ASV_9431	d__Bacteria;p__Firmicutes;c__Bacilli;o__Lactobacillales;f__Streptococcaceae;g__Streptococcus;s__unidentified_Streptococcus	0.8520981394744663
ASV_2250	d__Bacteria;p__Verrucomicrobia;c__Verrucomicrobiae;o__Verrucomicrobiales;f__Verrucomicrobiaceae;g__Akkermansia;s__Akkermansia_muciniphila	0.999999999997641
ASV_7416	d__Bacteria;p__Proteobacteria;c__Gammaproteobacteria;o__Enterobacteriales;f__Enterobacteriaceae;g__unclassified_Enterobacteriaceae;s__unclassified_Enterobacteriaceae	0.9999988263940214
ASV_818	d__Bacteria;p__Proteobacteria;c__Gammaproteobacteria;o__Aeromonadales;f__Aeromonadaceae;g__Aeromonas;s__unclassified_Aeromonas	0.991004414210668
ASV_24453	d__Bacteria;p__Firmicutes;c__Erysipelotrichi;o__Erysipelotrichales;f__Erysipelotrichaceae;g__Allobaculum;s__unidentified_Allobaculum	0.9999999999999147
ASV_6687	d__Bacteria;p__Proteobacteria;c__Alphaproteobacteria;o__Sphingomonadales;f__Sphingomonadaceae;g__Novosphingobium;s__Novosphingobium_capsulatum	0.9968289957041787
ASV_23449	d__Bacteria;p__Proteobacteria;c__Gammaproteobacteria;o__Pasteurellales;f__Pasteurellaceae;g__Haemophilus;s__Haemophilus_parainfluenzae	0.9932514604472987
ASV_11986	d__Bacteria;p__Firmicutes;c__Clostridia;o__Clostridiales;f__unidentified_Clostridiales;g__unidentified_Clostridiales;s__unidentified_Clostridiales	0.742311211143274
ASV_13783	d__Bacteria;p__Bacteroidetes;c__Bacteroidia;o__Bacteroidales;f__Bacteroidaceae;g__Bacteroides;s__Bacteroides_acidifaciens	0.87484440820317
ASV_14600	d__Bacteria;p__Tenericutes;c__Mollicutes;o__unidentified_Mollicutes;f__unidentified_Mollicutes;g__unidentified_Mollicutes;s__unidentified_Mollicutes	0.9933684549704944
ASV_8502	d__Bacteria;p__Firmicutes;c__Clostridia;o__Clostridiales;f__unclassified_Clostridiales;g__unclassified_Clostridiales;s__unclassified_Clostridiales	0.9999999999795307
ASV_2347	d__Bacteria;p__Bacteroidetes;c__Bacteroidia;o__Bacteroidales;f__S24-7;g__unidentified_S24-7;s__unidentified_S24-7	0.9999594107158525
ASV_18991	d__Bacteria;p__Fusobacteria;c__Fusobacteriia;o__Fusobacteriales;f__Fusobacteriaceae;g__Fusobacterium;s__unidentified_Fusobacterium	0.999998088162252
ASV_22784	d__Bacteria;p__Proteobacteria;c__Betaproteobacteria;o__Neisseriales;f__Neisseriaceae;g__Neisseria;s__unclassified_Neisseria	0.9936722303148464
ASV_12278	d__Bacteria;p__Proteobacteria;c__Gammaproteobacteria;o__Enterobacteriales;f__Enterobacteriaceae;g__unclassified_Enterobacteriaceae;s__unclassified_Enterobacteriaceae	0.9999988280762162
ASV_1996	d__Bacteria;p__Tenericutes;c__Mollicutes;o__RsaHF231;f__unidentified_RsaHF231;g__unidentified_RsaHF231;s__unidentified_RsaHF231	0.9999847086303518
ASV_14904	d__Bacteria;p__Proteobacteria;c__Gammaproteobacteria;o__Enterobacteriales;f__Enterobacteriaceae;g__unclassified_Enterobacteriaceae;s__unclassified_Enterobacteriaceae	0.9999883973963308
ASV_520	d__Bacteria;p__Firmicutes;c__Clostridia;o__Clostridiales;f__Peptostreptococcaceae;g__unidentified_Peptostreptococcaceae;s__unidentified_Peptostreptococcaceae	0.7738729936093423
ASV_19426	d__Bacteria;p__Proteobacteria;c__Gammaproteobacteria;o__Enterobacteriales;f__Enterobacteriaceae;g__Pseudomonas;s__Pseudomonas_syringae	0.9167217675428149
ASV_24518	d__Bacteria;p__Firmicutes;c__Bacilli;o__Lactobacillales;f__Streptococcaceae;g__Lactococcus;s__unidentified_Lactococcus	0.9999999519505718
ASV_8405	d__Bacteria;p__Proteobacteria;c__Gammaproteobacteria;o__Enterobacteriales;f__Enterobacteriaceae;g__Hafnia;s__Hafnia_alvei	0.7041662638887226
ASV_4205	d__Bacteria;p__Proteobacteria;c__Gammaproteobacteria;o__Enterobacteriales;f__Enterobacteriaceae;g__unclassified_Enterobacteriaceae;s__unclassified_Enterobacteriaceae	0.9999964524588253
ASV_2729	d__Bacteria;p__Proteobacteria;c__Betaproteobacteria;o__Neisseriales;f__Neisseriaceae;g__Neisseria;s__unclassified_Neisseria	0.8063073293258398
ASV_9192	d__Bacteria;p__Bacteroidetes;c__Bacteroidia;o__Bacteroidales;f__Bacteroidaceae;g__Bacteroides;s__Bacteroides_uniformis	0.9749347126893912
ASV_12927	d__Bacteria;p__Firmicutes;c__Bacilli;o__Lactobacillales;f__Enterococcaceae;g__Enterococcus;s__unclassified_Enterococcus	0.7850653831993671
ASV_25999	d__Bacteria;p__Bacteroidetes;c__Flavobacteriia;o__Flavobacteriales;f__Flavobacteriaceae;g__Flavobacterium;s__Flavobacterium_frigidarium	0.853571183209369
ASV_1598	d__Bacteria;p__Actinobacteria;c__Actinobacteria;o__Actinomycetales;f__Beutenbergiaceae;g__unclassified_Beutenbergiaceae;s__unclassified_Beutenbergiaceae	0.7435186915255807
ASV_19525	d__Bacteria;p__Proteobacteria;c__Gammaproteobacteria;o__Enterobacteriales;f__Enterobacteriaceae;g__Edwardsiella;s__unidentified_Edwardsiella	0.9998631187144109
ASV_772	d__Bacteria;p__Firmicutes;c__Bacilli;o__Lactobacillales;f__Lactobacillaceae;g__Lactobacillus;s__unidentified_Lactobacillus	0.9998075024988164
ASV_7821	d__Bacteria;p__Actinobacteria;c__Actinobacteria;o__Actinomycetales;f__Micrococcaceae;g__Rothia;s__Rothia_mucilaginosa	0.7374727838177265
ASV_9241	d__Bacteria;p__Firmicutes;c__Bacilli;o__Lactobacillales;f__Streptococcaceae;g__Streptococcus;s__unidentified_Streptococcus	0.9929919912494298
ASV_167	d__Bacteria;p__Bacteroidetes;c__Bacteroidia;o__Bacteroidales;f__Bacteroidaceae;g__Bacteroides;s__Bacteroides_acidifaciens	0.7565751096018292
ASV_13138	d__Bacteria;p__Bacteroidetes;c__Bacteroidia;o__Bacteroidales;f__S24-7;g__unidentified_S24-7;s__unidentified_S24-7	0.9999997086638783
ASV_23316	d__Bacteria;p__Firmicutes;c__Erysipelotrichi;o__Erysipelotrichales;f__Erysipelotrichaceae;g__Allobaculum;s__unidentified_Allobaculum	0.9999999999973568
ASV_11799	d__Bacteria;p__Proteobacteria;c__Betaproteobacteria;o__Burkholderiales;f__Comamonadaceae;g__Delftia;s__unidentified_Delftia	0.8981131793060038
ASV_17337	d__Bacteria;p__Bacteroidetes;c__Bacteroidia;o__Bacteroidales;f__Bacteroidaceae;g__Bacteroides;s__unidentified_Bacteroides	0.9817781280273098
ASV_10529	d__Bacteria;p__Firmicutes;c__Erysipelotrichi;o__Erysipelotrichales;f__Erysipelotrichaceae;g__Allobaculum;s__unidentified_Allobaculum	0.9999999964074675
ASV_9643	d__Bacteria;p__Firmicutes;c__Clostridia;o__Clostridiales;f__Lachnospiraceae;g__unidentified_Lachnospiraceae;s__unidentified_Lachnospiraceae	0.8588660594345908
ASV_25718	d__Bacteria;p__Proteobacteria;c__Gammaproteobacteria;o__Pseudomonadales;f__Moraxellaceae;g__Acinetobacter;s__unidentified_Acinetobacter	0.7714567108481568
ASV_9356	d__Bacteria;p__Proteobacteria;c__Gammaproteobacteria;o__Enterobacteriales;f__Enterobacteriaceae;g__Pseudomonas;s__Pseudomonas_syringae	0.9987566956910764
ASV_22149	d__Bacteria;p__Actinobacteria;c__Actinobacteria;o__Actinomycetales;f__Micrococcaceae;g__unclassified_Micrococcaceae;s__unclassified_Micrococcaceae	0.7519602114302797
ASV_1648	d__Bacteria;p__Firmicutes;c__Clostridia;o__Clostridiales;f__Lachnospiraceae;g__unclassified_Lachnospiraceae;s__unclassified_Lachnospiraceae	0.975387758195113
ASV_14393	d__Bacteria;p__Proteobacteria;c__Gammaproteobacteria;o__Enterobacteriales;f__Enterobacteriaceae;g__unclassified_Enterobacteriaceae;s__unclassified_Enterobacteriaceae	0.99999563978055
ASV_8127	d__Bacteria;p__Proteobacteria;c__Gammaproteobacteria;o__Pseudomonadales;f__Pseudomonadaceae;g__Pseudomonas;s__Pseudomonas_fragi	0.9130292113848955
ASV_13031	d__Bacteria;p__Firmicutes;c__Clostridia;o__Clostridiales;f__unidentified_Clostridiales;g__unidentified_Clostridiales;s__unidentified_Clostridiales	0.999874127815178
ASV_6149	d__Bacteria;p__Proteobacteria;c__Gammaproteobacteria;o__Aeromonadales;f__Aeromonadaceae;g__Aeromonas;s__unclassified_Aeromonas	0.8549871144600314
ASV_1425	d__Bacteria;p__Firmicutes;c__Clostridia;o__Clostridiales;f__unidentified_Clostridiales;g__unidentified_Clostridiales;s__unidentified_Clostridiales	0.893148485552737
ASV_9023	d__Bacteria;p__Proteobacteria;c__Gammaproteobacteria;o__Alteromonadales;f__Shewanellaceae;g__Shewanella;s__unidentified_Shewanella	0.9999542635880458
ASV_25786	d__Bacteria;p__Firmicutes;c__Bacilli;o__Lactobacillales;f__Lactobacillaceae;g__Lactobacillus;s__unidentified_Lactobacillus	0.9949524522714029
ASV_9506	d__Bacteria;p__Proteobacteria;c__Gammaproteobacteria;o__Pseudomonadales;f__Pseudomonadaceae;g__Pseudomonas;s__Pseudomonas_fragi	0.8412857547391352
ASV_11519	d__Bacteria;p__Proteobacteria;c__Gammaproteobacteria;o__Enterobacteriales;f__Enterobacteriaceae;g__unclassified_Enterobacteriaceae;s__unclassified_Enterobacteriaceae	0.9999995071529492
ASV_14231	d__Bacteria;p__Bacteroidetes;c__Bacteroidia;o__Bacteroidales;f__S24-7;g__unidentified_S24-7;s__unidentified_S24-7	0.9999997323159636
ASV_7517	d__Bacteria;p__Bacteroidetes;c__Bacteroidia;o__Bacteroidales;f__[Paraprevotellaceae];g__[Prevotella];s__unidentified_[Prevotella]	0.9913371842066416
ASV_3431	d__Bacteria;p__Bacteroidetes;c__Bacteroidia;o__Bacteroidales;f__S24-7;g__unidentified_S24-7;s__unidentified_S24-7	0.9999999571452642
ASV_20536	d__Bacteria;p__Firmicutes;c__Bacilli;o__Lactobacillales;f__Streptococcaceae;g__Streptococcus;s__unidentified_Streptococcus	0.9837446083088287
ASV_5421	d__Bacteria;p__Proteobacteria;c__Gammaproteobacteria;o__Enterobacteriales;f__Enterobacteriaceae;g__Pseudomonas;s__Pseudomonas_syringae	0.9885150433287527
ASV_12405	d__Bacteria;p__Proteobacteria;c__Alphaproteobacteria;o__Rhodospirillales;f__Rhodospirillaceae;g__Azospirillum;s__unidentified_Azospirillum	0.999996110275679
ASV_24213	d__Bacteria;p__Firmicutes;c__Clostridia;o__Clostridiales;f__Ruminococcaceae;g__Oscillospira;s__unidentified_Oscillospira	0.9998814614043953
ASV_15694	d__Bacteria;p__Bacteroidetes;c__Bacteroidia;o__Bacteroidales;f__Bacteroidaceae;g__Bacteroides;s__Bacteroides_uniformis	0.7499901955183619
ASV_26128	d__Bacteria;p__Firmicutes;c__Bacilli;o__Bacillales;f__Planococcaceae;g__unclassified_Planococcaceae;s__unclassified_Planococcaceae	0.9904199555413707
ASV_2551	d__Bacteria;p__Proteobacteria;c__Betaproteobacteria;o__Burkholderiales;f__Comamonadaceae;g__unclassified_Comamonadaceae;s__unclassified_Comamonadaceae	0.9997916982043045
ASV_8258	d__Bacteria;p__Bacteroidetes;c__Bacteroidia;o__Bacteroidales;f__S24-7;g__unidentified_S24-7;s__unidentified_S24-7	0.9999999778102622
ASV_25644	d__Bacteria;p__Actinobacteria;c__Actinobacteria;o__Actinomycetales;f__Microbacteriaceae;g__unclassified_Microbacteriaceae;s__unclassified_Microbacteriaceae	0.9996778996473301
ASV_17136	d__Bacteria;p__Proteobacteria;c__Gammaproteobacteria;o__Enterobacteriales;f__Enterobacteriaceae;g__unclassified_Enterobacteriaceae;s__unclassified_Enterobacteriaceae	0.9999998775381057
ASV_10431	d__Bacteria;p__Bacteroidetes;c__Bacteroidia;o__Bacteroidales;f__Prevotellaceae;g__Prevotella;s__Prevotella_melaninogenica	0.99996313502137
ASV_14312	d__Bacteria;p__Proteobacteria;c__Betaproteobacteria;o__Burkholderiales;f__Comamonadaceae;g__Aquabacterium;s__unidentified_Aquabacterium	0.9760019855635566
ASV_4671	d__Bacteria;p__Firmicutes;c__Bacilli;o__Bacillales;f__Bacillaceae;g__unclassified_Bacillaceae;s__unclassified_Bacillaceae	0.9138712027581425
ASV_20628	d__Bacteria;p__Actinobacteria;c__Coriobacteriia;o__Coriobacteriales;f__Coriobacteriaceae;g__unidentified_Coriobacteriaceae;s__unidentified_Coriobacteriaceae	0.7610089284858725
ASV_13806	d__Bacteria;p__Proteobacteria;c__Betaproteobacteria;o__Burkholderiales;f__Comamonadaceae;g__Aquabacterium;s__unidentified_Aquabacterium	0.9614880847717432
ASV_21465	d__Bacteria;p__Nitrospirae;c__Nitrospira;o__Nitrospirales;f__0319-6A21;g__unidentified_0319-6A21;s__unidentified_0319-6A21	0.9999999996761062
ASV_16890	d__Bacteria;p__Proteobacteria;c__Alphaproteobacteria;o__Rhizobiales;f__Bradyrhizobiaceae;g__unclassified_Bradyrhizobiaceae;s__unclassified_Bradyrhizobiaceae	0.9845340727131962
ASV_5231	d__Bacteria;p__Proteobacteria;c__Gammaproteobacteria;o__Pseudomonadales;f__Pseudomonadaceae;g__Pseudomonas;s__Pseudomonas_fragi	0.8665761718958469
ASV_22495	d__Bacteria;p__Firmicutes;c__Clostridia;o__Clostridiales;f__unidentified_Clostridiales;g__unidentified_Clostridiales;s__unidentified_Clostridiales	0.8759434216788216
ASV_2878	d__Bacteria;p__Proteobacteria;c__Gammaproteobacteria;o__Oceanospirillales;f__Oceanospirillaceae;g__unidentified_Oceanospirillaceae;s__unidentified_Oceanospirillaceae	0.7772986728372581
ASV_4050	d__Bacteria;p__Bacteroidetes;c__[Saprospirae];o__[Saprospirales];f__Chitinophagaceae;g__Flavisolibacter;s__unidentified_Flavisolibacter	0.9925675705414876
ASV_1464	d__Bacteria;p__Firmicutes;c__Bacilli;o__Lactobacillales;f__Lactobacillaceae;g__Lactobacillus;s__Lactobacillus_vaginalis	0.8159673974725319
ASV_2155	d__Bacteria;p__Bacteroidetes;c__Bacteroidia;o__Bacteroidales;f__S24-7;g__unidentified_S24-7;s__unidentified_S24-7	0.9999999819559094
ASV_25550	d__Bacteria;p__Proteobacteria;c__Gammaproteobacteria;o__Enterobacteriales;f__Enterobacteriaceae;g__unclassified_Enterobacteriaceae;s__unclassified_Enterobacteriaceae	0.9999764495645197
ASV_24188	d__Bacteria;p__Firmicutes;c__Clostridia;o__Clostridiales;f__Veillonellaceae;g__Veillonella;s__Veillonella_dispar	0.8064735590926301
ASV_21714	d__Bacteria;p__Firmicutes;c__Bacilli;o__Lactobacillales;f__Streptococcaceae;g__Streptococcus;s__unidentified_Streptococcus	0.9991633903019456
ASV_10029	d__Bacteria;p__Proteobacteria;c__Alphaproteobacteria;o__Sphingomonadales;f__Sphingomonadaceae;g__Kaistobacter;s__unidentified_Kaistobacter	0.9984645423998036
ASV_8559	d__Bacteria;p__Actinobacteria;c__Actinobacteria;o__Actinomycetales;f__Micrococcaceae;g__Rothia;s__Rothia_dentocariosa	0.9977741225298098
ASV_15746	d__Bacteria;p__Actinobacteria;c__Actinobacteria;o__Actinomycetales;f__Micrococcaceae;g__Arthrobacter;s__unclassified_Arthrobacter	0.9220350717489879
ASV_16952	d__Bacteria;p__Proteobacteria;c__Gammaproteobacteria;o__Alteromonadales;f__Shewanellaceae;g__Shewanella;s__unidentified_Shewanella	0.842158141649773
ASV_9142	d__Bacteria;p__Proteobacteria;c__Betaproteobacteria;o__Burkholderiales;f__Comamonadaceae;g__unclassified_Comamonadaceae;s__unclassified_Comamonadaceae	0.9999854783903508
ASV_25097	d__Bacteria;p__Actinobacteria;c__Actinobacteria;o__Actinomycetales;f__unclassified_Actinomycetales;g__unclassified_Actinomycetales;s__unclassified_Actinomycetales	0.9999984105268864
ASV_20040	d__Bacteria;p__Bacteroidetes;c__[Saprospirae];o__[Saprospirales];f__Chitinophagaceae;g__Flavisolibacter;s__unidentified_Flavisolibacter	0.9934686048023198
ASV_8015	d__Bacteria;p__Proteobacteria;c__Gammaproteobacteria;o__Aeromonadales;f__Aeromonadaceae;g__unclassified_Aeromonadaceae;s__unclassified_Aeromonadaceae	0.8856150302257991
ASV_2404	d__Bacteria;p__Proteobacteria;c__Deltaproteobacteria;o__Desulfovibrionales;f__Desulfovibrionaceae;g__Desulfovibrio;s__Desulfovibrio_C21_c20	0.9999997012891575
ASV_14402	d__Bacteria;p__Proteobacteria;c__Gammaproteobacteria;o__Enterobacteriales;f__Enterobacteriaceae;g__Hafnia;s__Hafnia_alvei	0.7040664663937634
ASV_14542	d__Bacteria;p__Firmicutes;c__Clostridia;o__Clostridiales;f__unidentified_Clostridiales;g__unidentified_Clostridiales;s__unidentified_Clostridiales	0.9999024388545886
ASV_22453	d__Bacteria;p__Proteobacteria;c__Epsilonproteobacteria;o__Campylobacterales;f__Helicobacteraceae;g__unclassified_Helicobacteraceae;s__unclassified_Helicobacteraceae	0.999999999999427
ASV_21302	d__Bacteria;p__Firmicutes;c__Bacilli;o__Lactobacillales;f__Lactobacillaceae;g__Lactobacillus;s__Lactobacillus_vaginalis	0.7727669561389445
ASV_8551	d__Bacteria;p__Proteobacteria;c__Gammaproteobacteria;o__Enterobacteriales;f__Enterobacteriaceae;g__unclassified_Enterobacteriaceae;s__unclassified_Enterobacteriaceae	0.9999473276850817
ASV_23089	d__Bacteria;p__Proteobacteria;c__Betaproteobacteria;o__Burkholderiales;f__Comamonadaceae;g__unclassified_Comamonadaceae;s__unclassified_Comamonadaceae	0.9999092717518063
ASV_12963	d__Bacteria;p__Firmicutes;c__Bacilli;o__Gemellales;f__Gemellaceae;g__unclassified_Gemellaceae;s__unclassified_Gemellaceae	0.9999993490565943
ASV_12042	d__Bacteria;p__Bacteroidetes;c__Bacteroidia;o__Bacteroidales;f__Rikenellaceae;g__Alistipes;s__unclassified_Alistipes	0.8078564569082319
ASV_23072	d__Bacteria;p__Firmicutes;c__Clostridia;o__Clostridiales;f__unidentified_Clostridiales;g__unidentified_Clostridiales;s__unidentified_Clostridiales	0.9998479734683765
ASV_2309	d__Bacteria;p__Bacteroidetes;c__Bacteroidia;o__Bacteroidales;f__Bacteroidaceae;g__Bacteroides;s__Bacteroides_acidifaciens	0.9502160524781079
ASV_4505	d__Bacteria;p__Firmicutes;c__Clostridia;o__Clostridiales;f__Ruminococcaceae;g__unidentified_Ruminococcaceae;s__unidentified_Ruminococcaceae	0.9899686978521036
ASV_18891	d__Bacteria;p__Actinobacteria;c__Actinobacteria;o__Actinomycetales;f__Cellulomonadaceae;g__Cellulomonas;s__unidentified_Cellulomonas	0.992037805878016
ASV_19039	d__Bacteria;p__Bacteroidetes;c__Bacteroidia;o__Bacteroidales;f__S24-7;g__unidentified_S24-7;s__unidentified_S24-7	0.9999999837060046
ASV_9641	d__Bacteria;p__Actinobacteria;c__Thermoleophilia;o__Solirubrobacterales;f__unidentified_Solirubrobacterales;g__unidentified_Solirubrobacterales;s__unidentified_Solirubrobacterales	0.9754312048679589
ASV_2590	d__Bacteria;p__Firmicutes;c__Bacilli;o__Lactobacillales;f__Streptococcaceae;g__Streptococcus;s__unidentified_Streptococcus	0.9974390547500933
ASV_3814	d__Bacteria;p__Proteobacteria;c__Gammaproteobacteria;o__Aeromonadales;f__Aeromonadaceae;g__unclassified_Aeromonadaceae;s__unclassified_Aeromonadaceae	0.8444156775624319
ASV_25751	d__Bacteria;p__Firmicutes;c__Bacilli;o__Lactobacillales;f__Lactobacillaceae;g__Lactobacillus;s__unidentified_Lactobacillus	0.999835017223687
ASV_8875	d__Bacteria;p__Proteobacteria;c__Gammaproteobacteria;o__Alteromonadales;f__Shewanellaceae;g__Shewanella;s__unclassified_Shewanella	0.8159729710260015
ASV_14418	d__Bacteria;p__Actinobacteria;c__Actinobacteria;o__Bifidobacteriales;f__Bifidobacteriaceae;g__Bifidobacterium;s__Bifidobacterium_pseudolongum	0.993887924231367
ASV_12184	d__Bacteria;p__Proteobacteria;c__Gammaproteobacteria;o__Pseudomonadales;f__Pseudomonadaceae;g__Pseudomonas;s__unclassified_Pseudomonas	0.9780153290058036
ASV_783	d__Bacteria;p__Proteobacteria;c__Gammaproteobacteria;o__Enterobacteriales;f__Enterobacteriaceae;g__Pseudomonas;s__Pseudomonas_syringae	0.9987255827847464
ASV_20057	d__Bacteria;p__Bacteroidetes;c__Bacteroidia;o__Bacteroidales;f__[Paraprevotellaceae];g__[Prevotella];s__unidentified_[Prevotella]	0.9932740323024527
ASV_25363	d__Bacteria;p__Proteobacteria;c__Gammaproteobacteria;o__Enterobacteriales;f__Enterobacteriaceae;g__Pseudomonas;s__Pseudomonas_syringae	0.9748707710360319
ASV_3688	d__Bacteria;p__Proteobacteria;c__Gammaproteobacteria;o__Enterobacteriales;f__Enterobacteriaceae;g__Pseudomonas;s__Pseudomonas_syringae	0.8962899471617084
ASV_10671	d__Bacteria;p__Bacteroidetes;c__Bacteroidia;o__Bacteroidales;f__S24-7;g__unidentified_S24-7;s__unidentified_S24-7	0.9999987158832939
ASV_25163	d__Bacteria;p__Proteobacteria;c__Epsilonproteobacteria;o__Campylobacterales;f__Helicobacteraceae;g__Helicobacter;s__unclassified_Helicobacter	0.9895205261775609
ASV_13509	d__Bacteria;p__Bacteroidetes;c__Bacteroidia;o__Bacteroidales;f__S24-7;g__unidentified_S24-7;s__unidentified_S24-7	0.9999999519894243
ASV_4130	d__Bacteria;p__Bacteroidetes;c__Bacteroidia;o__Bacteroidales;f__Prevotellaceae;g__Prevotella;s__Prevotella_melaninogenica	0.9998847760877106
ASV_23438	d__Bacteria;p__Firmicutes;c__Bacilli;o__Lactobacillales;f__Lactobacillaceae;g__Lactobacillus;s__unidentified_Lactobacillus	0.9988568788235511
ASV_21368	d__Bacteria;p__Proteobacteria;c__Betaproteobacteria;o__Burkholderiales;f__Comamonadaceae;g__unclassified_Comamonadaceae;s__unclassified_Comamonadaceae	0.9997595136652191
ASV_21412	d__Bacteria;p__Proteobacteria;c__Betaproteobacteria;o__Burkholderiales;f__Comamonadaceae;g__Methylibium;s__unclassified_Methylibium	0.7246281023277609
ASV_13792	d__Bacteria;p__Bacteroidetes;c__Bacteroidia;o__Bacteroidales;f__S24-7;g__unidentified_S24-7;s__unidentified_S24-7	0.9999981213862295
ASV_941	d__Bacteria;p__Bacteroidetes;c__Bacteroidia;o__Bacteroidales;f__S24-7;g__unidentified_S24-7;s__unidentified_S24-7	0.9999961900319752
ASV_10568	d__Bacteria;p__Proteobacteria;c__Gammaproteobacteria;o__Pseudomonadales;f__Moraxellaceae;g__Acinetobacter;s__unidentified_Acinetobacter	0.9950525096767102
ASV_13470	d__Bacteria;p__Acidobacteria;c__iii1-8;o__DS-18;f__unidentified_DS-18;g__unidentified_DS-18;s__unidentified_DS-18	0.9999999872487707
ASV_10330	d__Bacteria;p__Bacteroidetes;c__Bacteroidia;o__Bacteroidales;f__S24-7;g__unidentified_S24-7;s__unidentified_S24-7	0.9999951236475887
ASV_9033	d__Bacteria;p__Firmicutes;c__Clostridia;o__Clostridiales;f__Veillonellaceae;g__Acidaminococcus;s__unidentified_Acidaminococcus	0.9824606157906364
ASV_18572	d__Bacteria;p__Firmicutes;c__Clostridia;o__Clostridiales;f__Clostridiaceae;g__Clostridium;s__Clostridium_colicanis	0.9940213700232248
ASV_14543	d__Bacteria;p__Proteobacteria;c__Betaproteobacteria;o__Neisseriales;f__Neisseriaceae;g__Neisseria;s__unclassified_Neisseria	0.998313825225672
ASV_570	d__Bacteria;p__Firmicutes;c__Bacilli;o__Lactobacillales;f__Lactobacillaceae;g__Lactobacillus;s__unidentified_Lactobacillus	0.9663397297275044
ASV_8279	d__Bacteria;p__Proteobacteria;c__Gammaproteobacteria;o__unclassified_Gammaproteobacteria;f__unclassified_Gammaproteobacteria;g__unclassified_Gammaproteobacteria;s__unclassified_Gammaproteobacteria	0.9999999265847042
ASV_4458	d__Bacteria;p__Proteobacteria;c__Gammaproteobacteria;o__Enterobacteriales;f__Enterobacteriaceae;g__unclassified_Enterobacteriaceae;s__unclassified_Enterobacteriaceae	0.9999987610456327
ASV_22095	d__Bacteria;p__Cyanobacteria;c__Chloroplast;o__Streptophyta;f__unidentified_Streptophyta;g__unidentified_Streptophyta;s__unidentified_Streptophyta	0.9999999991019024
ASV_8035	d__Bacteria;p__Proteobacteria;c__Gammaproteobacteria;o__Aeromonadales;f__Aeromonadaceae;g__Aeromonas;s__unclassified_Aeromonas	0.986018863832689
ASV_21097	d__Bacteria;p__Proteobacteria;c__Gammaproteobacteria;o__Aeromonadales;f__Aeromonadaceae;g__Aeromonas;s__unclassified_Aeromonas	0.9708446686761246
ASV_6104	d__Bacteria;p__Proteobacteria;c__Betaproteobacteria;o__Burkholderiales;f__Comamonadaceae;g__unclassified_Comamonadaceae;s__unclassified_Comamonadaceae	0.9998584612082242
ASV_20332	d__Bacteria;p__Proteobacteria;c__Gammaproteobacteria;o__Enterobacteriales;f__Enterobacteriaceae;g__unclassified_Enterobacteriaceae;s__unclassified_Enterobacteriaceae	0.9786064466340099
ASV_4490	d__Bacteria;p__Actinobacteria;c__Coriobacteriia;o__Coriobacteriales;f__Coriobacteriaceae;g__Adlercreutzia;s__unidentified_Adlercreutzia	0.999904199696888
ASV_19386	d__Bacteria;p__Bacteroidetes;c__Bacteroidia;o__Bacteroidales;f__S24-7;g__unidentified_S24-7;s__unidentified_S24-7	0.9999986717235754
ASV_6445	d__Bacteria;p__Firmicutes;c__Clostridia;o__Clostridiales;f__Veillonellaceae;g__Veillonella;s__Veillonella_parvula	0.7607488681445381
ASV_15664	d__Bacteria;p__Bacteroidetes;c__Bacteroidia;o__Bacteroidales;f__Prevotellaceae;g__Prevotella;s__unidentified_Prevotella	0.9993029065305332
ASV_6568	d__Bacteria;p__Firmicutes;c__Bacilli;o__Lactobacillales;f__Streptococcaceae;g__Lactococcus;s__unidentified_Lactococcus	0.9999662444955841
ASV_18639	d__Bacteria;p__Actinobacteria;c__Actinobacteria;o__Actinomycetales;f__Nocardiaceae;g__Rhodococcus;s__unidentified_Rhodococcus	0.997511467949396
ASV_3503	d__Bacteria;p__Firmicutes;c__Clostridia;o__Clostridiales;f__Christensenellaceae;g__unidentified_Christensenellaceae;s__unidentified_Christensenellaceae	0.9999785027977165
ASV_4421	d__Bacteria;p__Bacteroidetes;c__Bacteroidia;o__Bacteroidales;f__S24-7;g__unidentified_S24-7;s__unidentified_S24-7	0.9999993470752457
ASV_6286	d__Bacteria;p__Firmicutes;c__Clostridia;o__Clostridiales;f__unidentified_Clostridiales;g__unidentified_Clostridiales;s__unidentified_Clostridiales	0.9998926450698173
ASV_6715	d__Bacteria;p__Firmicutes;c__Bacilli;o__Bacillales;f__Bacillaceae;g__unclassified_Bacillaceae;s__unclassified_Bacillaceae	0.7468758556108223
ASV_4609	d__Bacteria;p__Proteobacteria;c__Gammaproteobacteria;o__Enterobacteriales;f__Enterobacteriaceae;g__Pseudomonas;s__Pseudomonas_syringae	0.7487595957088355
ASV_9382	d__Bacteria;p__Firmicutes;c__Bacilli;o__Lactobacillales;f__unidentified_Lactobacillales;g__unidentified_Lactobacillales;s__unidentified_Lactobacillales	0.7502501915740555
ASV_14198	d__Bacteria;p__Firmicutes;c__Clostridia;o__Clostridiales;f__Ruminococcaceae;g__Oscillospira;s__unidentified_Oscillospira	0.9981252739160964
ASV_4902	d__Bacteria;p__Bacteroidetes;c__Bacteroidia;o__Bacteroidales;f__S24-7;g__unidentified_S24-7;s__unidentified_S24-7	0.9999999440574088
ASV_24092	d__Bacteria;p__Firmicutes;c__Bacilli;o__Lactobacillales;f__Lactobacillaceae;g__Lactobacillus;s__unidentified_Lactobacillus	0.9989845219045107
ASV_24133	d__Bacteria;p__Bacteroidetes;c__Bacteroidia;o__Bacteroidales;f__[Paraprevotellaceae];g__Paraprevotella;s__unidentified_Paraprevotella	0.9999107577163433
ASV_22043	d__Bacteria;p__Proteobacteria;c__Gammaproteobacteria;o__Enterobacteriales;f__Enterobacteriaceae;g__Pseudomonas;s__Pseudomonas_syringae	0.9589150566364681
ASV_17633	d__Bacteria;p__Proteobacteria;c__Gammaproteobacteria;o__Pseudomonadales;f__Pseudomonadaceae;g__Pseudomonas;s__unidentified_Pseudomonas	0.7093220555179719
ASV_3138	d__Bacteria;p__Bacteroidetes;c__Bacteroidia;o__Bacteroidales;f__Bacteroidaceae;g__Bacteroides;s__Bacteroides_acidifaciens	0.9952770401601341
ASV_4972	d__Bacteria;p__Proteobacteria;c__Gammaproteobacteria;o__Enterobacteriales;f__Enterobacteriaceae;g__Pseudomonas;s__Pseudomonas_syringae	0.9026695688335656
ASV_11143	d__Bacteria;p__Proteobacteria;c__Gammaproteobacteria;o__Pseudomonadales;f__Pseudomonadaceae;g__Pseudomonas;s__Pseudomonas_stutzeri	0.8697513333712744
ASV_15193	d__Bacteria;p__Proteobacteria;c__Gammaproteobacteria;o__Alteromonadales;f__Shewanellaceae;g__Shewanella;s__unidentified_Shewanella	0.7527709875798756
ASV_14915	d__Bacteria;p__Bacteroidetes;c__Bacteroidia;o__Bacteroidales;f__S24-7;g__unidentified_S24-7;s__unidentified_S24-7	0.9910477806312259
ASV_16587	d__Bacteria;p__Proteobacteria;c__Gammaproteobacteria;o__Aeromonadales;f__Aeromonadaceae;g__Aeromonas;s__unclassified_Aeromonas	0.9809637133746365
ASV_7735	d__Bacteria;p__Proteobacteria;c__Betaproteobacteria;o__Burkholderiales;f__Comamonadaceae;g__unclassified_Comamonadaceae;s__unclassified_Comamonadaceae	0.905403216939634
ASV_21036	d__Bacteria;p__Proteobacteria;c__Gammaproteobacteria;o__Enterobacteriales;f__Enterobacteriaceae;g__unclassified_Enterobacteriaceae;s__unclassified_Enterobacteriaceae	0.9531852696250637
ASV_2433	d__Bacteria;p__Bacteroidetes;c__Flavobacteriia;o__Flavobacteriales;f__Flavobacteriaceae;g__Capnocytophaga;s__unidentified_Capnocytophaga	0.999976684548825
ASV_9774	d__Bacteria;p__Firmicutes;c__Clostridia;o__Clostridiales;f__Veillonellaceae;g__Acidaminococcus;s__unidentified_Acidaminococcus	0.9999998478116767
ASV_15133	d__Bacteria;p__Firmicutes;c__Clostridia;o__Clostridiales;f__Ruminococcaceae;g__Oscillospira;s__unidentified_Oscillospira	0.9995905195518126
ASV_168	d__Bacteria;p__Proteobacteria;c__Gammaproteobacteria;o__Enterobacteriales;f__Enterobacteriaceae;g__unclassified_Enterobacteriaceae;s__unclassified_Enterobacteriaceae	0.9999998959989422
ASV_21569	d__Bacteria;p__Firmicutes;c__Clostridia;o__Clostridiales;f__Peptostreptococcaceae;g__Clostridium;s__Clostridium_ruminantium	0.8771019674118596
ASV_14452	d__Bacteria;p__Proteobacteria;c__Betaproteobacteria;o__Burkholderiales;f__Comamonadaceae;g__unclassified_Comamonadaceae;s__unclassified_Comamonadaceae	0.9509720449776853
ASV_16380	d__Bacteria;p__Proteobacteria;c__Gammaproteobacteria;o__Alteromonadales;f__Alteromonadaceae;g__Cellvibrio;s__unidentified_Cellvibrio	0.9990433201140683
ASV_5689	d__Bacteria;p__Proteobacteria;c__Gammaproteobacteria;o__Pseudomonadales;f__Pseudomonadaceae;g__Pseudomonas;s__unidentified_Pseudomonas	0.9102163066085348
ASV_9471	d__Bacteria;p__Firmicutes;c__Bacilli;o__Turicibacterales;f__Turicibacteraceae;g__Turicibacter;s__unidentified_Turicibacter	0.9999999728583194
ASV_19187	d__Bacteria;p__Proteobacteria;c__Betaproteobacteria;o__Burkholderiales;f__Comamonadaceae;g__unclassified_Comamonadaceae;s__unclassified_Comamonadaceae	0.9999900703020945
ASV_14185	d__Bacteria;p__Proteobacteria;c__Betaproteobacteria;o__Neisseriales;f__Neisseriaceae;g__unclassified_Neisseriaceae;s__unclassified_Neisseriaceae	0.9997453086246857
ASV_2093	d__Bacteria;p__Actinobacteria;c__Actinobacteria;o__Actinomycetales;f__Micrococcaceae;g__Arthrobacter;s__Arthrobacter_crystallopoietes	0.8234975322739826
ASV_3526	d__Bacteria;p__Bacteroidetes;c__Flavobacteriia;o__Flavobacteriales;f__[Weeksellaceae];g__Chryseobacterium;s__unidentified_Chryseobacterium	0.9998428157055905
ASV_14267	d__Bacteria;p__Firmicutes;c__Clostridia;o__Clostridiales;f__Clostridiaceae;g__Candidatus_Arthromitus;s__unidentified_Candidatus_Arthromitus	0.9999999999049862
ASV_15206	d__Bacteria;p__Firmicutes;c__Clostridia;o__Clostridiales;f__unidentified_Clostridiales;g__unidentified_Clostridiales;s__unidentified_Clostridiales	0.8045210036392662
ASV_2966	d__Bacteria;p__Firmicutes;c__Bacilli;o__Lactobacillales;f__Lactobacillaceae;g__Lactobacillus;s__unidentified_Lactobacillus	0.8406479418959781
ASV_7837	d__Bacteria;p__Proteobacteria;c__Gammaproteobacteria;o__Enterobacteriales;f__Enterobacteriaceae;g__unclassified_Enterobacteriaceae;s__unclassified_Enterobacteriaceae	0.9957057076813647
ASV_11638	d__Bacteria;p__Firmicutes;c__Bacilli;o__Lactobacillales;f__unidentified_Lactobacillales;g__unidentified_Lactobacillales;s__unidentified_Lactobacillales	0.9052995832224144
ASV_20699	d__Bacteria;p__Firmicutes;c__Bacilli;o__Lactobacillales;f__unclassified_Lactobacillales;g__unclassified_Lactobacillales;s__unclassified_Lactobacillales	0.999827235161632
ASV_18629	d__Bacteria;p__Firmicutes;c__Clostridia;o__Clostridiales;f__Ruminococcaceae;g__unidentified_Ruminococcaceae;s__unidentified_Ruminococcaceae	0.9062399505787476
ASV_16622	d__Bacteria;p__Firmicutes;c__Clostridia;o__Clostridiales;f__Ruminococcaceae;g__unidentified_Ruminococcaceae;s__unidentified_Ruminococcaceae	0.7018921133329378
ASV_7478	d__Bacteria;p__Bacteroidetes;c__Bacteroidia;o__Bacteroidales;f__Porphyromonadaceae;g__Parabacteroides;s__unidentified_Parabacteroides	0.9984169228475324
ASV_21769	d__Bacteria;p__Proteobacteria;c__Gammaproteobacteria;o__Aeromonadales;f__Aeromonadaceae;g__Aeromonas;s__unclassified_Aeromonas	0.9126943577730021
ASV_21135	d__Bacteria;p__Proteobacteria;c__Gammaproteobacteria;o__Enterobacteriales;f__Enterobacteriaceae;g__Pseudomonas;s__Pseudomonas_syringae	0.9559914527699254
ASV_19295	d__Bacteria;p__Actinobacteria;c__Actinobacteria;o__Actinomycetales;f__Nocardiaceae;g__Rhodococcus;s__unidentified_Rhodococcus	0.9038555868448904
ASV_8072	d__Bacteria;p__Proteobacteria;c__Betaproteobacteria;o__Methylophilales;f__Methylophilaceae;g__Methylotenera;s__Methylotenera_versatilis	0.7804409411016561
ASV_13685	d__Bacteria;p__Bacteroidetes;c__Bacteroidia;o__Bacteroidales;f__S24-7;g__unidentified_S24-7;s__unidentified_S24-7	0.7717569129055978
ASV_10144	d__Bacteria;p__Firmicutes;c__Bacilli;o__Lactobacillales;f__Lactobacillaceae;g__Lactobacillus;s__unidentified_Lactobacillus	0.9999420384182265
ASV_17040	d__Bacteria;p__Bacteroidetes;c__Bacteroidia;o__Bacteroidales;f__S24-7;g__unidentified_S24-7;s__unidentified_S24-7	0.9999999559957483
ASV_20568	d__Bacteria;p__Proteobacteria;c__Betaproteobacteria;o__Burkholderiales;f__Comamonadaceae;g__unclassified_Comamonadaceae;s__unclassified_Comamonadaceae	0.9992767601676015
ASV_6851	d__Bacteria;p__Firmicutes;c__Bacilli;o__Lactobacillales;f__Lactobacillaceae;g__Lactobacillus;s__unidentified_Lactobacillus	0.7193654152554367
ASV_13245	d__Bacteria;p__Proteobacteria;c__Betaproteobacteria;o__Neisseriales;f__Neisseriaceae;g__Neisseria;s__unclassified_Neisseria	0.8792586352244965
ASV_21693	d__Bacteria;p__Bacteroidetes;c__Bacteroidia;o__Bacteroidales;f__S24-7;g__unidentified_S24-7;s__unidentified_S24-7	0.9998829460248398
ASV_18810	d__Bacteria;p__Proteobacteria;c__Gammaproteobacteria;o__Alteromonadales;f__Alteromonadaceae;g__Cellvibrio;s__unidentified_Cellvibrio	0.9992296944594214
ASV_6008	d__Bacteria;p__Bacteroidetes;c__Flavobacteriia;o__Flavobacteriales;f__Flavobacteriaceae;g__Capnocytophaga;s__unidentified_Capnocytophaga	0.9999999086047111
ASV_9064	d__Bacteria;p__Actinobacteria;c__Actinobacteria;o__Actinomycetales;f__Micrococcaceae;g__Rothia;s__unidentified_Rothia	0.8880355082129918
ASV_22779	d__Bacteria;p__Bacteroidetes;c__Bacteroidia;o__Bacteroidales;f__S24-7;g__unidentified_S24-7;s__unidentified_S24-7	0.9999130872637912
ASV_21618	d__Bacteria;p__Proteobacteria;c__Gammaproteobacteria;o__Enterobacteriales;f__Enterobacteriaceae;g__unclassified_Enterobacteriaceae;s__unclassified_Enterobacteriaceae	0.9991282723857955
ASV_1908	d__Bacteria;p__Firmicutes;c__Erysipelotrichi;o__Erysipelotrichales;f__Erysipelotrichaceae;g__Clostridium;s__Clostridium_ramosum	0.9398250513129338
ASV_14888	d__Bacteria;p__Firmicutes;c__Clostridia;o__Clostridiales;f__Veillonellaceae;g__Veillonella;s__Veillonella_dispar	0.9593517589977387
ASV_8595	d__Bacteria;p__Firmicutes;c__Erysipelotrichi;o__Erysipelotrichales;f__Erysipelotrichaceae;g__p-75-a5;s__unidentified_p-75-a5	0.9999999950667586
ASV_22570	d__Bacteria;p__Bacteroidetes;c__Bacteroidia;o__Bacteroidales;f__Porphyromonadaceae;g__Parabacteroides;s__unidentified_Parabacteroides	0.9785839189298927
ASV_14964	d__Bacteria;p__Proteobacteria;c__Betaproteobacteria;o__Neisseriales;f__Neisseriaceae;g__Neisseria;s__unclassified_Neisseria	0.9445208759341912
ASV_10471	d__Bacteria;p__Proteobacteria;c__Epsilonproteobacteria;o__Campylobacterales;f__Campylobacteraceae;g__Sulfurospirillum;s__unidentified_Sulfurospirillum	0.9999999491930693
ASV_23694	d__Bacteria;p__Bacteroidetes;c__Bacteroidia;o__Bacteroidales;f__S24-7;g__unidentified_S24-7;s__unidentified_S24-7	0.9999992570888796
ASV_9953	d__Bacteria;p__Bacteroidetes;c__Bacteroidia;o__Bacteroidales;f__S24-7;g__unidentified_S24-7;s__unidentified_S24-7	0.9999997551682343
ASV_18590	d__Bacteria;p__Bacteroidetes;c__Bacteroidia;o__Bacteroidales;f__S24-7;g__unidentified_S24-7;s__unidentified_S24-7	0.9999998247050297
ASV_26461	d__Bacteria;p__Bacteroidetes;c__Bacteroidia;o__Bacteroidales;f__S24-7;g__unidentified_S24-7;s__unidentified_S24-7	0.9999999822727547
ASV_21272	d__Bacteria;p__unclassified_Bacteria;c__unclassified_Bacteria;o__unclassified_Bacteria;f__unclassified_Bacteria;g__unclassified_Bacteria;s__unclassified_Bacteria	0.9999999951476137
ASV_8984	d__Bacteria;p__Bacteroidetes;c__Bacteroidia;o__Bacteroidales;f__Prevotellaceae;g__Prevotella;s__unidentified_Prevotella	0.9123766355626436
ASV_26026	d__Bacteria;p__Bacteroidetes;c__Bacteroidia;o__Bacteroidales;f__Porphyromonadaceae;g__Parabacteroides;s__Parabacteroides_distasonis	0.9989697197377795
ASV_8945	d__Bacteria;p__Bacteroidetes;c__Bacteroidia;o__Bacteroidales;f__Bacteroidaceae;g__Bacteroides;s__unidentified_Bacteroides	0.8976416856952791
ASV_20931	d__Bacteria;p__Proteobacteria;c__Gammaproteobacteria;o__unclassified_Gammaproteobacteria;f__unclassified_Gammaproteobacteria;g__unclassified_Gammaproteobacteria;s__unclassified_Gammaproteobacteria	0.9622322625473656
ASV_2327	d__Bacteria;p__Bacteroidetes;c__Bacteroidia;o__Bacteroidales;f__Bacteroidaceae;g__Bacteroides;s__unidentified_Bacteroides	0.920807462494536
ASV_11825	d__Bacteria;p__Bacteroidetes;c__Bacteroidia;o__Bacteroidales;f__S24-7;g__unidentified_S24-7;s__unidentified_S24-7	0.9614453844048176
ASV_23783	d__Bacteria;p__Bacteroidetes;c__[Saprospirae];o__[Saprospirales];f__Saprospiraceae;g__Haliscomenobacter;s__unidentified_Haliscomenobacter	0.9999994514553888
ASV_16188	d__Bacteria;p__Proteobacteria;c__Alphaproteobacteria;o__Caulobacterales;f__Caulobacteraceae;g__Asticcacaulis;s__unidentified_Asticcacaulis	0.9999945540050068
ASV_25368	d__Bacteria;p__Firmicutes;c__Bacilli;o__Lactobacillales;f__Enterococcaceae;g__unclassified_Enterococcaceae;s__unclassified_Enterococcaceae	0.7040573371455332
ASV_5634	d__Bacteria;p__Actinobacteria;c__Coriobacteriia;o__Coriobacteriales;f__Coriobacteriaceae;g__Collinsella;s__Collinsella_aerofaciens	0.9505478460586224
ASV_1027	d__Bacteria;p__Bacteroidetes;c__Bacteroidia;o__Bacteroidales;f__[Paraprevotellaceae];g__unidentified_[Paraprevotellaceae];s__unidentified_[Paraprevotellaceae]	0.8814000656806976
ASV_20243	d__Bacteria;p__Bacteroidetes;c__Bacteroidia;o__Bacteroidales;f__Bacteroidaceae;g__Bacteroides;s__unidentified_Bacteroides	0.9997468596666028
ASV_20572	d__Bacteria;p__Bacteroidetes;c__Bacteroidia;o__Bacteroidales;f__S24-7;g__unidentified_S24-7;s__unidentified_S24-7	0.9879141980381134
ASV_22877	d__Bacteria;p__Bacteroidetes;c__Bacteroidia;o__Bacteroidales;f__Bacteroidaceae;g__Bacteroides;s__unidentified_Bacteroides	0.9938377774344341
ASV_7341	d__Bacteria;p__Proteobacteria;c__Betaproteobacteria;o__Methylophilales;f__Methylophilaceae;g__Methylotenera;s__Methylotenera_versatilis	0.9734355091565826
ASV_7808	d__Bacteria;p__Proteobacteria;c__Alphaproteobacteria;o__Rhodospirillales;f__unidentified_Rhodospirillales;g__unidentified_Rhodospirillales;s__unidentified_Rhodospirillales	0.9999999430525025
ASV_11419	d__Bacteria;p__Proteobacteria;c__Gammaproteobacteria;o__Enterobacteriales;f__Enterobacteriaceae;g__Hafnia;s__Hafnia_alvei	0.7049410318098973
ASV_5751	d__Bacteria;p__Bacteroidetes;c__Bacteroidia;o__Bacteroidales;f__[Odoribacteraceae];g__Odoribacter;s__unidentified_Odoribacter	0.9999999990006927
ASV_22125	d__Bacteria;p__Proteobacteria;c__Alphaproteobacteria;o__Sphingomonadales;f__Sphingomonadaceae;g__Novosphingobium;s__unclassified_Novosphingobium	0.7429788837718634
ASV_8027	d__Bacteria;p__TM7;c__TM7-3;o__CW040;f__F16;g__unidentified_F16;s__unidentified_F16	0.9999999958304784
ASV_13295	d__Bacteria;p__Proteobacteria;c__Gammaproteobacteria;o__Enterobacteriales;f__Enterobacteriaceae;g__unclassified_Enterobacteriaceae;s__unclassified_Enterobacteriaceae	0.9999643196001262
ASV_16723	d__Bacteria;p__Proteobacteria;c__Gammaproteobacteria;o__Enterobacteriales;f__Enterobacteriaceae;g__Pseudomonas;s__Pseudomonas_syringae	0.7812898368162161
ASV_14604	d__Bacteria;p__Proteobacteria;c__Betaproteobacteria;o__Neisseriales;f__Neisseriaceae;g__Neisseria;s__unclassified_Neisseria	0.8771102220478647
ASV_21026	d__Bacteria;p__Proteobacteria;c__unclassified_Proteobacteria;o__unclassified_Proteobacteria;f__unclassified_Proteobacteria;g__unclassified_Proteobacteria;s__unclassified_Proteobacteria	0.9792690016402156
ASV_16430	d__Bacteria;p__Deferribacteres;c__Deferribacteres;o__Deferribacterales;f__Deferribacteraceae;g__Mucispirillum;s__Mucispirillum_schaedleri	0.9999997374105537
ASV_12597	d__Bacteria;p__Bacteroidetes;c__Bacteroidia;o__Bacteroidales;f__S24-7;g__unidentified_S24-7;s__unidentified_S24-7	0.9999991567365927
ASV_18723	d__Bacteria;p__Bacteroidetes;c__Bacteroidia;o__Bacteroidales;f__S24-7;g__unidentified_S24-7;s__unidentified_S24-7	0.9999973394351834
ASV_13171	d__Bacteria;p__Bacteroidetes;c__Bacteroidia;o__Bacteroidales;f__Bacteroidaceae;g__Bacteroides;s__unidentified_Bacteroides	0.9980900581091343
ASV_8102	d__Bacteria;p__Proteobacteria;c__Gammaproteobacteria;o__Enterobacteriales;f__Enterobacteriaceae;g__unclassified_Enterobacteriaceae;s__unclassified_Enterobacteriaceae	0.9799706378620463
ASV_26453	d__Bacteria;p__Proteobacteria;c__Betaproteobacteria;o__Neisseriales;f__Neisseriaceae;g__unclassified_Neisseriaceae;s__unclassified_Neisseriaceae	0.9997939292314022
ASV_702	d__Bacteria;p__Firmicutes;c__Bacilli;o__Lactobacillales;f__Streptococcaceae;g__Streptococcus;s__unidentified_Streptococcus	0.9832844980371354
ASV_26236	d__Bacteria;p__Proteobacteria;c__Gammaproteobacteria;o__Alteromonadales;f__Shewanellaceae;g__Shewanella;s__unidentified_Shewanella	0.9696517502529831
ASV_13664	d__Bacteria;p__Tenericutes;c__Mollicutes;o__unidentified_Mollicutes;f__unidentified_Mollicutes;g__unidentified_Mollicutes;s__unidentified_Mollicutes	0.9919605429888957
ASV_1159	d__Bacteria;p__Bacteroidetes;c__Bacteroidia;o__Bacteroidales;f__Prevotellaceae;g__Prevotella;s__unidentified_Prevotella	0.9999904932310519
ASV_20207	d__Bacteria;p__Firmicutes;c__Erysipelotrichi;o__Erysipelotrichales;f__Erysipelotrichaceae;g__unidentified_Erysipelotrichaceae;s__unidentified_Erysipelotrichaceae	0.9932877803095157
ASV_308	d__Bacteria;p__Bacteroidetes;c__Flavobacteriia;o__Flavobacteriales;f__[Weeksellaceae];g__Chryseobacterium;s__unidentified_Chryseobacterium	0.8472708178854532
ASV_1670	d__Bacteria;p__Proteobacteria;c__Gammaproteobacteria;o__Alteromonadales;f__Alteromonadaceae;g__Cellvibrio;s__unidentified_Cellvibrio	0.9808165961596297
ASV_2824	d__Bacteria;p__Proteobacteria;c__Gammaproteobacteria;o__Vibrionales;f__Vibrionaceae;g__Vibrio;s__unclassified_Vibrio	0.8473036526631766
ASV_2834	d__Bacteria;p__Proteobacteria;c__Alphaproteobacteria;o__Rhizobiales;f__Bradyrhizobiaceae;g__unclassified_Bradyrhizobiaceae;s__unclassified_Bradyrhizobiaceae	0.9997553835592298
ASV_18636	d__Bacteria;p__Bacteroidetes;c__Bacteroidia;o__Bacteroidales;f__S24-7;g__unidentified_S24-7;s__unidentified_S24-7	0.9123162254407783
ASV_22245	d__Bacteria;p__Bacteroidetes;c__Bacteroidia;o__Bacteroidales;f__Porphyromonadaceae;g__Parabacteroides;s__unidentified_Parabacteroides	0.9963192511496989
ASV_14138	d__Bacteria;p__Bacteroidetes;c__Bacteroidia;o__Bacteroidales;f__S24-7;g__unidentified_S24-7;s__unidentified_S24-7	0.9999698432015471
ASV_13014	d__Bacteria;p__Firmicutes;c__Bacilli;o__Lactobacillales;f__Lactobacillaceae;g__Lactobacillus;s__unidentified_Lactobacillus	0.9909169010298973
ASV_14727	d__Bacteria;p__Firmicutes;c__Bacilli;o__Bacillales;f__Bacillaceae;g__unclassified_Bacillaceae;s__unclassified_Bacillaceae	0.8005163664424121
ASV_24998	d__Bacteria;p__Proteobacteria;c__Gammaproteobacteria;o__Enterobacteriales;f__Enterobacteriaceae;g__Pseudomonas;s__Pseudomonas_syringae	0.772194536542867
ASV_20625	d__Bacteria;p__Bacteroidetes;c__Bacteroidia;o__Bacteroidales;f__Rikenellaceae;g__Alistipes;s__Alistipes_finegoldii	0.8371082776059048
ASV_53	d__Bacteria;p__Proteobacteria;c__Gammaproteobacteria;o__Aeromonadales;f__Aeromonadaceae;g__Aeromonas;s__unclassified_Aeromonas	0.9805319603779877
ASV_10513	d__Bacteria;p__Firmicutes;c__Clostridia;o__Clostridiales;f__Peptostreptococcaceae;g__unidentified_Peptostreptococcaceae;s__unidentified_Peptostreptococcaceae	0.9391995049874561
ASV_3043	d__Bacteria;p__Firmicutes;c__Clostridia;o__Clostridiales;f__unidentified_Clostridiales;g__unidentified_Clostridiales;s__unidentified_Clostridiales	0.9999207620373937
ASV_20513	d__Bacteria;p__Firmicutes;c__Clostridia;o__Clostridiales;f__unidentified_Clostridiales;g__unidentified_Clostridiales;s__unidentified_Clostridiales	0.7402363508709833
ASV_23125	d__Bacteria;p__Firmicutes;c__Clostridia;o__Clostridiales;f__unidentified_Clostridiales;g__unidentified_Clostridiales;s__unidentified_Clostridiales	0.9998482711582417
ASV_2278	d__Bacteria;p__Bacteroidetes;c__Bacteroidia;o__Bacteroidales;f__S24-7;g__unidentified_S24-7;s__unidentified_S24-7	0.9999972849299378
ASV_18064	d__Bacteria;p__Bacteroidetes;c__Bacteroidia;o__Bacteroidales;f__S24-7;g__unidentified_S24-7;s__unidentified_S24-7	0.9999969590490901
ASV_24081	d__Bacteria;p__Firmicutes;c__Clostridia;o__Clostridiales;f__Ruminococcaceae;g__Ruminococcus;s__Ruminococcus_callidus	0.9445172070197884
ASV_23941	d__Bacteria;p__Proteobacteria;c__Betaproteobacteria;o__Burkholderiales;f__Comamonadaceae;g__Rubrivivax;s__unidentified_Rubrivivax	0.9611290766496262
ASV_6083	d__Bacteria;p__Bacteroidetes;c__Bacteroidia;o__Bacteroidales;f__S24-7;g__unidentified_S24-7;s__unidentified_S24-7	0.9999998304713956
ASV_22586	d__Bacteria;p__Firmicutes;c__Clostridia;o__Clostridiales;f__Ruminococcaceae;g__Ruminococcus;s__Ruminococcus_callidus	0.9659584179494023
ASV_8941	d__Bacteria;p__Firmicutes;c__Bacilli;o__Lactobacillales;f__Lactobacillaceae;g__Lactobacillus;s__unidentified_Lactobacillus	0.7621808216561926
ASV_9345	d__Bacteria;p__Bacteroidetes;c__Bacteroidia;o__Bacteroidales;f__Prevotellaceae;g__Prevotella;s__unidentified_Prevotella	0.9989810882136394
ASV_17181	d__Bacteria;p__Bacteroidetes;c__Bacteroidia;o__Bacteroidales;f__S24-7;g__unidentified_S24-7;s__unidentified_S24-7	0.9999961018217598
ASV_17571	d__Bacteria;p__Bacteroidetes;c__Bacteroidia;o__Bacteroidales;f__Bacteroidaceae;g__Bacteroides;s__unidentified_Bacteroides	0.999999844528174
ASV_13150	d__Bacteria;p__Firmicutes;c__Clostridia;o__Clostridiales;f__Clostridiaceae;g__Clostridium;s__Clostridium_celatum	0.7154250016076784
ASV_11494	d__Bacteria;p__Proteobacteria;c__Gammaproteobacteria;o__Legionellales;f__unidentified_Legionellales;g__unidentified_Legionellales;s__unidentified_Legionellales	0.9530725011603143
ASV_13448	d__Bacteria;p__Firmicutes;c__Clostridia;o__Clostridiales;f__Ruminococcaceae;g__Ruminococcus;s__unidentified_Ruminococcus	0.9465907595356872
ASV_12230	d__Bacteria;p__Firmicutes;c__Clostridia;o__Clostridiales;f__unidentified_Clostridiales;g__unidentified_Clostridiales;s__unidentified_Clostridiales	0.9856716422939575
ASV_751	d__Bacteria;p__Firmicutes;c__Clostridia;o__Clostridiales;f__Clostridiaceae;g__Clostridium;s__Clostridium_baratii	0.872983297773312
ASV_2082	d__Bacteria;p__Firmicutes;c__Clostridia;o__Clostridiales;f__Ruminococcaceae;g__Ruminococcus;s__Ruminococcus_bromii	0.9999584302141775
ASV_18763	d__Bacteria;p__Firmicutes;c__Clostridia;o__Clostridiales;f__Ruminococcaceae;g__unidentified_Ruminococcaceae;s__unidentified_Ruminococcaceae	0.9989222702276884
ASV_17791	d__Bacteria;p__Bacteroidetes;c__Bacteroidia;o__Bacteroidales;f__Bacteroidaceae;g__Bacteroides;s__unidentified_Bacteroides	0.9999991230205447
ASV_3769	d__Bacteria;p__Proteobacteria;c__Alphaproteobacteria;o__Rhizobiales;f__unidentified_Rhizobiales;g__unidentified_Rhizobiales;s__unidentified_Rhizobiales	0.9847242518448391
ASV_16943	d__Bacteria;p__Actinobacteria;c__Actinobacteria;o__Actinomycetales;f__Microbacteriaceae;g__Clavibacter;s__unidentified_Clavibacter	0.9603201813524017
ASV_23359	d__Bacteria;p__Firmicutes;c__Clostridia;o__Clostridiales;f__Ruminococcaceae;g__unidentified_Ruminococcaceae;s__unidentified_Ruminococcaceae	0.9052696520505518
ASV_26193	d__Bacteria;p__Firmicutes;c__Clostridia;o__Clostridiales;f__Ruminococcaceae;g__Ruminococcus;s__Ruminococcus_bromii	0.9113392065218852
ASV_1838	d__Bacteria;p__Firmicutes;c__Clostridia;o__Clostridiales;f__unclassified_Clostridiales;g__unclassified_Clostridiales;s__unclassified_Clostridiales	0.9999999997540059
ASV_12102	d__Bacteria;p__Bacteroidetes;c__Bacteroidia;o__Bacteroidales;f__[Paraprevotellaceae];g__[Prevotella];s__unidentified_[Prevotella]	0.9999917168120199
ASV_21677	d__Bacteria;p__Proteobacteria;c__Gammaproteobacteria;o__Enterobacteriales;f__Enterobacteriaceae;g__Shigella;s__unclassified_Shigella	0.8229099669146619
ASV_15051	d__Bacteria;p__Firmicutes;c__Bacilli;o__Lactobacillales;f__Streptococcaceae;g__Streptococcus;s__Streptococcus_alactolyticus	0.822072390989227
ASV_23755	d__Bacteria;p__Proteobacteria;c__Alphaproteobacteria;o__Rhizobiales;f__Hyphomicrobiaceae;g__unclassified_Hyphomicrobiaceae;s__unclassified_Hyphomicrobiaceae	0.9996905802107454
ASV_10983	d__Bacteria;p__Firmicutes;c__Clostridia;o__Clostridiales;f__Ruminococcaceae;g__unidentified_Ruminococcaceae;s__unidentified_Ruminococcaceae	0.9710736004196697
ASV_20160	d__Bacteria;p__Proteobacteria;c__Gammaproteobacteria;o__Enterobacteriales;f__Enterobacteriaceae;g__Plesiomonas;s__unclassified_Plesiomonas	0.7005004812410864
ASV_23757	d__Bacteria;p__Firmicutes;c__Clostridia;o__Clostridiales;f__Peptostreptococcaceae;g__unidentified_Peptostreptococcaceae;s__unidentified_Peptostreptococcaceae	0.9289554417873463
ASV_14959	d__Bacteria;p__Firmicutes;c__Clostridia;o__Clostridiales;f__unidentified_Clostridiales;g__unidentified_Clostridiales;s__unidentified_Clostridiales	0.8859636868254751
ASV_10435	d__Bacteria;p__Bacteroidetes;c__Bacteroidia;o__Bacteroidales;f__Prevotellaceae;g__Prevotella;s__unidentified_Prevotella	0.9999006960789746
ASV_700	d__Bacteria;p__Bacteroidetes;c__Bacteroidia;o__Bacteroidales;f__S24-7;g__unidentified_S24-7;s__unidentified_S24-7	0.9999983468963783
ASV_11932	d__Bacteria;p__Proteobacteria;c__Betaproteobacteria;o__Burkholderiales;f__Comamonadaceae;g__Pelomonas;s__unclassified_Pelomonas	0.8378322571277241
ASV_8250	d__Bacteria;p__Firmicutes;c__Clostridia;o__Clostridiales;f__unidentified_Clostridiales;g__unidentified_Clostridiales;s__unidentified_Clostridiales	0.999927543136334
ASV_2807	d__Bacteria;p__Firmicutes;c__Clostridia;o__Clostridiales;f__Ruminococcaceae;g__Ruminococcus;s__Ruminococcus_bromii	0.968858717900733
ASV_23170	d__Bacteria;p__Firmicutes;c__Bacilli;o__Lactobacillales;f__Lactobacillaceae;g__Lactobacillus;s__Lactobacillus_helveticus	0.8772632287609886
ASV_10434	d__Bacteria;p__Firmicutes;c__Clostridia;o__Clostridiales;f__unidentified_Clostridiales;g__unidentified_Clostridiales;s__unidentified_Clostridiales	0.7056589786394541
ASV_4958	d__Bacteria;p__Proteobacteria;c__Gammaproteobacteria;o__Enterobacteriales;f__Enterobacteriaceae;g__unclassified_Enterobacteriaceae;s__unclassified_Enterobacteriaceae	0.9999805643006588
ASV_4843	d__Bacteria;p__Bacteroidetes;c__Bacteroidia;o__Bacteroidales;f__S24-7;g__unidentified_S24-7;s__unidentified_S24-7	0.9999974799072711
ASV_24311	d__Bacteria;p__Bacteroidetes;c__Bacteroidia;o__Bacteroidales;f__S24-7;g__unidentified_S24-7;s__unidentified_S24-7	0.9999998624763672
ASV_23272	d__Bacteria;p__Firmicutes;c__Clostridia;o__Clostridiales;f__Clostridiaceae;g__Clostridium;s__Clostridium_butyricum	0.9999632998927682
ASV_7758	d__Bacteria;p__Firmicutes;c__Clostridia;o__Clostridiales;f__Clostridiaceae;g__SMB53;s__unidentified_SMB53	0.7566242172411126
ASV_24644	d__Bacteria;p__Firmicutes;c__Clostridia;o__Clostridiales;f__unidentified_Clostridiales;g__unidentified_Clostridiales;s__unidentified_Clostridiales	0.9862483701024715
ASV_2264	d__Bacteria;p__Bacteroidetes;c__Bacteroidia;o__Bacteroidales;f__S24-7;g__unidentified_S24-7;s__unidentified_S24-7	0.9999998786720214
ASV_18862	d__Bacteria;p__Firmicutes;c__Clostridia;o__Clostridiales;f__Lachnospiraceae;g__Blautia;s__unidentified_Blautia	0.9558002147827334
ASV_5853	d__Bacteria;p__[Thermi];c__Deinococci;o__Thermales;f__Thermaceae;g__Thermus;s__unidentified_Thermus	0.9999999999986358
ASV_18136	d__Bacteria;p__Firmicutes;c__Clostridia;o__Clostridiales;f__Lachnospiraceae;g__Blautia;s__unidentified_Blautia	0.9848795614892022
ASV_1378	d__Bacteria;p__Firmicutes;c__Bacilli;o__Turicibacterales;f__Turicibacteraceae;g__Turicibacter;s__unidentified_Turicibacter	0.9999999958928072
ASV_26233	d__Bacteria;p__Bacteroidetes;c__Bacteroidia;o__Bacteroidales;f__S24-7;g__unidentified_S24-7;s__unidentified_S24-7	0.9999987857445358
ASV_12385	d__Bacteria;p__Firmicutes;c__Clostridia;o__Clostridiales;f__Ruminococcaceae;g__unidentified_Ruminococcaceae;s__unidentified_Ruminococcaceae	0.9888202156195729
ASV_26330	d__Bacteria;p__Bacteroidetes;c__Bacteroidia;o__Bacteroidales;f__Bacteroidaceae;g__Bacteroides;s__unidentified_Bacteroides	0.9773212619981416
ASV_14308	d__Bacteria;p__Firmicutes;c__Clostridia;o__Clostridiales;f__unidentified_Clostridiales;g__unidentified_Clostridiales;s__unidentified_Clostridiales	0.9998154303695018
ASV_20355	d__Bacteria;p__Firmicutes;c__Clostridia;o__Clostridiales;f__unidentified_Clostridiales;g__unidentified_Clostridiales;s__unidentified_Clostridiales	0.9999407865484709
ASV_14480	d__Bacteria;p__Firmicutes;c__Clostridia;o__Clostridiales;f__Lachnospiraceae;g__Roseburia;s__unidentified_Roseburia	0.7208070598861136
ASV_15195	d__Bacteria;p__Bacteroidetes;c__Bacteroidia;o__Bacteroidales;f__Bacteroidaceae;g__Bacteroides;s__unidentified_Bacteroides	0.9999991710404882
ASV_25274	d__Bacteria;p__Firmicutes;c__Clostridia;o__Clostridiales;f__Lachnospiraceae;g__unidentified_Lachnospiraceae;s__unidentified_Lachnospiraceae	0.9555831085466837
ASV_9669	d__Bacteria;p__Proteobacteria;c__Betaproteobacteria;o__Burkholderiales;f__Comamonadaceae;g__Acidovorax;s__unclassified_Acidovorax	0.9820385671295855
ASV_7990	d__Bacteria;p__Firmicutes;c__Clostridia;o__Clostridiales;f__Lachnospiraceae;g__Coprococcus;s__unidentified_Coprococcus	0.8569511302553198
ASV_992	d__Bacteria;p__Firmicutes;c__Clostridia;o__Clostridiales;f__Peptostreptococcaceae;g__unidentified_Peptostreptococcaceae;s__unidentified_Peptostreptococcaceae	0.9110545545797761
ASV_2774	d__Bacteria;p__Proteobacteria;c__Alphaproteobacteria;o__Caulobacterales;f__Caulobacteraceae;g__Caulobacter;s__unidentified_Caulobacter	0.7287831807791108
ASV_2244	d__Bacteria;p__Firmicutes;c__Clostridia;o__Clostridiales;f__[Mogibacteriaceae];g__unidentified_[Mogibacteriaceae];s__unidentified_[Mogibacteriaceae]	0.9999867228760654
ASV_13700	d__Bacteria;p__Bacteroidetes;c__Bacteroidia;o__Bacteroidales;f__Bacteroidaceae;g__Bacteroides;s__unidentified_Bacteroides	0.9999992699559748
ASV_25612	d__Bacteria;p__Firmicutes;c__Clostridia;o__Clostridiales;f__Ruminococcaceae;g__Ruminococcus;s__unidentified_Ruminococcus	0.9536188548495478
ASV_20410	d__Bacteria;p__Proteobacteria;c__Gammaproteobacteria;o__Xanthomonadales;f__Xanthomonadaceae;g__unidentified_Xanthomonadaceae;s__unidentified_Xanthomonadaceae	0.9950721905899615
ASV_22200	d__Bacteria;p__Firmicutes;c__Clostridia;o__Clostridiales;f__Lachnospiraceae;g__Coprococcus;s__unidentified_Coprococcus	0.8727069500612175
ASV_21529	d__Bacteria;p__Bacteroidetes;c__Bacteroidia;o__Bacteroidales;f__Porphyromonadaceae;g__Parabacteroides;s__unidentified_Parabacteroides	0.9999819591926044
ASV_20785	d__Bacteria;p__Firmicutes;c__Clostridia;o__Clostridiales;f__Clostridiaceae;g__Clostridium;s__Clostridium_perfringens	0.9998544165154805
ASV_8492	d__Bacteria;p__Firmicutes;c__Clostridia;o__Clostridiales;f__Lachnospiraceae;g__unidentified_Lachnospiraceae;s__unidentified_Lachnospiraceae	0.9341626201492846
ASV_15461	d__Bacteria;p__Firmicutes;c__Clostridia;o__Clostridiales;f__Lachnospiraceae;g__unidentified_Lachnospiraceae;s__unidentified_Lachnospiraceae	0.771993784800022
ASV_2085	d__Bacteria;p__Firmicutes;c__Clostridia;o__Clostridiales;f__Lachnospiraceae;g__unclassified_Lachnospiraceae;s__unclassified_Lachnospiraceae	0.9832230797896528
ASV_13909	d__Bacteria;p__Firmicutes;c__Clostridia;o__Clostridiales;f__Lachnospiraceae;g__Roseburia;s__unidentified_Roseburia	0.8866576900709887
ASV_25279	d__Bacteria;p__Firmicutes;c__Bacilli;o__Lactobacillales;f__Lactobacillaceae;g__Lactobacillus;s__unclassified_Lactobacillus	0.7775234144616229
ASV_24298	d__Bacteria;p__Bacteroidetes;c__Bacteroidia;o__Bacteroidales;f__S24-7;g__unidentified_S24-7;s__unidentified_S24-7	0.9999997144766278
ASV_18116	d__Bacteria;p__Proteobacteria;c__Betaproteobacteria;o__Burkholderiales;f__Comamonadaceae;g__Pelomonas;s__unclassified_Pelomonas	0.8682869672562605
ASV_4318	d__Bacteria;p__Firmicutes;c__Clostridia;o__Clostridiales;f__unidentified_Clostridiales;g__unidentified_Clostridiales;s__unidentified_Clostridiales	0.99994065528604
ASV_10415	d__Bacteria;p__Firmicutes;c__Clostridia;o__Clostridiales;f__unidentified_Clostridiales;g__unidentified_Clostridiales;s__unidentified_Clostridiales	0.9999898106369894
ASV_1399	d__Bacteria;p__Firmicutes;c__Clostridia;o__Clostridiales;f__Lachnospiraceae;g__[Ruminococcus];s__[Ruminococcus]_gnavus	0.901506310413137
ASV_15327	d__Bacteria;p__Firmicutes;c__Clostridia;o__Clostridiales;f__unidentified_Clostridiales;g__unidentified_Clostridiales;s__unidentified_Clostridiales	0.9999913858253938
ASV_17229	d__Bacteria;p__Firmicutes;c__Clostridia;o__Clostridiales;f__unidentified_Clostridiales;g__unidentified_Clostridiales;s__unidentified_Clostridiales	0.9534137176109391
ASV_4408	d__Bacteria;p__Firmicutes;c__Clostridia;o__Clostridiales;f__Lachnospiraceae;g__unidentified_Lachnospiraceae;s__unidentified_Lachnospiraceae	0.9530323255701854
ASV_19601	d__Bacteria;p__Proteobacteria;c__Gammaproteobacteria;o__Pseudomonadales;f__Moraxellaceae;g__Acinetobacter;s__Acinetobacter_johnsonii	0.7477304047258938
ASV_25631	d__Bacteria;p__Firmicutes;c__Clostridia;o__Clostridiales;f__Ruminococcaceae;g__unidentified_Ruminococcaceae;s__unidentified_Ruminococcaceae	0.9991594092516459
ASV_11310	d__Bacteria;p__Firmicutes;c__Clostridia;o__Clostridiales;f__Clostridiaceae;g__Clostridium;s__Clostridium_celatum	0.853325012430675
ASV_13604	d__Bacteria;p__Firmicutes;c__Clostridia;o__Clostridiales;f__Clostridiaceae;g__Clostridium;s__unidentified_Clostridium	0.9857193734498362
ASV_13887	d__Bacteria;p__Firmicutes;c__Clostridia;o__Clostridiales;f__Clostridiaceae;g__Clostridium;s__unidentified_Clostridium	0.98385507482792
ASV_14288	d__Bacteria;p__Bacteroidetes;c__Bacteroidia;o__Bacteroidales;f__S24-7;g__unidentified_S24-7;s__unidentified_S24-7	0.9999987538520918
ASV_13227	d__Bacteria;p__Firmicutes;c__Clostridia;o__Clostridiales;f__Ruminococcaceae;g__Oscillospira;s__unidentified_Oscillospira	0.9990863254400509
ASV_14456	d__Bacteria;p__Firmicutes;c__Clostridia;o__Clostridiales;f__Ruminococcaceae;g__unidentified_Ruminococcaceae;s__unidentified_Ruminococcaceae	0.7824392524925069
ASV_14116	d__Bacteria;p__Firmicutes;c__Clostridia;o__Clostridiales;f__unclassified_Clostridiales;g__unclassified_Clostridiales;s__unclassified_Clostridiales	0.9999999999891586
ASV_8130	d__Bacteria;p__Firmicutes;c__Clostridia;o__Clostridiales;f__unidentified_Clostridiales;g__unidentified_Clostridiales;s__unidentified_Clostridiales	0.9999356705724389
ASV_1246	d__Bacteria;p__OP8;c__OP8_1;o__unidentified_OP8_1;f__unidentified_OP8_1;g__unidentified_OP8_1;s__unidentified_OP8_1	0.9999770801617743
ASV_22313	d__Bacteria;p__Bacteroidetes;c__Bacteroidia;o__Bacteroidales;f__Bacteroidaceae;g__Bacteroides;s__unidentified_Bacteroides	0.9997230278884018
ASV_19424	d__Bacteria;p__Proteobacteria;c__Betaproteobacteria;o__Burkholderiales;f__Oxalobacteraceae;g__Cupriavidus;s__Cupriavidus_gilardii	0.877664771051204
ASV_3487	d__Bacteria;p__Firmicutes;c__Clostridia;o__Clostridiales;f__Lachnospiraceae;g__Roseburia;s__unidentified_Roseburia	0.7452270164466455
ASV_5559	d__Bacteria;p__Bacteroidetes;c__Bacteroidia;o__Bacteroidales;f__S24-7;g__unidentified_S24-7;s__unidentified_S24-7	0.9999833550987778
ASV_3386	d__Bacteria;p__Actinobacteria;c__Thermoleophilia;o__Solirubrobacterales;f__unidentified_Solirubrobacterales;g__unidentified_Solirubrobacterales;s__unidentified_Solirubrobacterales	0.9999999986049488
ASV_17357	d__Bacteria;p__Firmicutes;c__Clostridia;o__Clostridiales;f__unidentified_Clostridiales;g__unidentified_Clostridiales;s__unidentified_Clostridiales	0.9999800444280919
ASV_8607	d__Bacteria;p__Firmicutes;c__Clostridia;o__Clostridiales;f__Clostridiaceae;g__Clostridium;s__unidentified_Clostridium	0.9857291199602289
ASV_25491	d__Bacteria;p__Firmicutes;c__Clostridia;o__Clostridiales;f__Ruminococcaceae;g__Ruminococcus;s__Ruminococcus_flavefaciens	0.9999902812195863
ASV_23903	d__Bacteria;p__Firmicutes;c__Clostridia;o__Clostridiales;f__Lachnospiraceae;g__unclassified_Lachnospiraceae;s__unclassified_Lachnospiraceae	0.9552808317665642
ASV_9664	d__Bacteria;p__Bacteroidetes;c__Bacteroidia;o__Bacteroidales;f__p-2534-18B5;g__unidentified_p-2534-18B5;s__unidentified_p-2534-18B5	0.9999998210291938
ASV_17093	d__Bacteria;p__Tenericutes;c__Mollicutes;o__RF39;f__unidentified_RF39;g__unidentified_RF39;s__unidentified_RF39	0.9999999990742481
ASV_7869	d__Bacteria;p__Firmicutes;c__Clostridia;o__Clostridiales;f__Lachnospiraceae;g__[Ruminococcus];s__[Ruminococcus]_gnavus	0.9963234627609496
ASV_25972	d__Bacteria;p__Proteobacteria;c__Alphaproteobacteria;o__Caulobacterales;f__Caulobacteraceae;g__Brevundimonas;s__Brevundimonas_intermedia	0.761356832173886
ASV_24082	d__Bacteria;p__Firmicutes;c__Clostridia;o__Clostridiales;f__Ruminococcaceae;g__Ruminococcus;s__Ruminococcus_flavefaciens	0.9999931859419414
ASV_4095	d__Bacteria;p__Firmicutes;c__Clostridia;o__Clostridiales;f__unclassified_Clostridiales;g__unclassified_Clostridiales;s__unclassified_Clostridiales	0.9998055337135225
ASV_15599	d__Bacteria;p__Firmicutes;c__Clostridia;o__Clostridiales;f__Clostridiaceae;g__Proteiniclasticum;s__unidentified_Proteiniclasticum	0.99999842122278
ASV_1093	d__Bacteria;p__Proteobacteria;c__Gammaproteobacteria;o__Pseudomonadales;f__Moraxellaceae;g__Acinetobacter;s__unidentified_Acinetobacter	0.8167283737520918
ASV_18084	d__Bacteria;p__Firmicutes;c__Clostridia;o__Clostridiales;f__Ruminococcaceae;g__Oscillospira;s__unidentified_Oscillospira	0.9997477502456319
ASV_2667	d__Bacteria;p__Firmicutes;c__Clostridia;o__Clostridiales;f__Lachnospiraceae;g__unidentified_Lachnospiraceae;s__unidentified_Lachnospiraceae	0.8383272976989479
ASV_24661	d__Bacteria;p__Proteobacteria;c__Betaproteobacteria;o__Burkholderiales;f__Comamonadaceae;g__Schlegelella;s__unidentified_Schlegelella	0.9993250397457414
ASV_8755	d__Bacteria;p__Firmicutes;c__Clostridia;o__Clostridiales;f__Christensenellaceae;g__unidentified_Christensenellaceae;s__unidentified_Christensenellaceae	0.9974911944283182
ASV_25069	d__Bacteria;p__Firmicutes;c__Clostridia;o__Clostridiales;f__Lachnospiraceae;g__Roseburia;s__unidentified_Roseburia	0.7051015629885634
ASV_6978	d__Bacteria;p__Firmicutes;c__Clostridia;o__Clostridiales;f__Lachnospiraceae;g__Coprococcus;s__unidentified_Coprococcus	0.781626305500646
ASV_164	d__Bacteria;p__Proteobacteria;c__Gammaproteobacteria;o__Pseudomonadales;f__Moraxellaceae;g__Psychrobacter;s__unidentified_Psychrobacter	0.9977587393969127
ASV_26419	d__Bacteria;p__Bacteroidetes;c__Bacteroidia;o__Bacteroidales;f__[Paraprevotellaceae];g__Paraprevotella;s__unidentified_Paraprevotella	0.9999978668492148
ASV_15641	d__Bacteria;p__Proteobacteria;c__Gammaproteobacteria;o__Pseudomonadales;f__Moraxellaceae;g__Acinetobacter;s__Acinetobacter_johnsonii	0.7356599134344083
ASV_24190	d__Bacteria;p__Firmicutes;c__Clostridia;o__Clostridiales;f__Lachnospiraceae;g__Coprococcus;s__unidentified_Coprococcus	0.9274541889391683
ASV_17033	d__Bacteria;p__Firmicutes;c__Clostridia;o__Clostridiales;f__Lachnospiraceae;g__unidentified_Lachnospiraceae;s__unidentified_Lachnospiraceae	0.7002923812595
ASV_3837	d__Bacteria;p__Tenericutes;c__Mollicutes;o__RF39;f__unidentified_RF39;g__unidentified_RF39;s__unidentified_RF39	0.9999999994860502
ASV_15331	d__Bacteria;p__Firmicutes;c__Clostridia;o__Clostridiales;f__unidentified_Clostridiales;g__unidentified_Clostridiales;s__unidentified_Clostridiales	0.8721206787112921
ASV_4062	d__Bacteria;p__Firmicutes;c__Clostridia;o__Clostridiales;f__Ruminococcaceae;g__Oscillospira;s__unidentified_Oscillospira	0.855308992068828
ASV_4122	d__Bacteria;p__Proteobacteria;c__Gammaproteobacteria;o__Pseudomonadales;f__Moraxellaceae;g__Acinetobacter;s__Acinetobacter_lwoffii	0.9894199603363311
ASV_13860	d__Bacteria;p__Bacteroidetes;c__Bacteroidia;o__Bacteroidales;f__S24-7;g__unidentified_S24-7;s__unidentified_S24-7	0.9999999610222127
ASV_19146	d__Bacteria;p__Firmicutes;c__Clostridia;o__Clostridiales;f__Ruminococcaceae;g__Ruminococcus;s__Ruminococcus_flavefaciens	0.9999983581537442
ASV_1289	d__Bacteria;p__Firmicutes;c__Clostridia;o__Clostridiales;f__unidentified_Clostridiales;g__unidentified_Clostridiales;s__unidentified_Clostridiales	0.999992564101425
ASV_15867	d__Bacteria;p__Bacteroidetes;c__Bacteroidia;o__Bacteroidales;f__S24-7;g__unidentified_S24-7;s__unidentified_S24-7	0.9999986784454145
ASV_23451	d__Bacteria;p__Firmicutes;c__Clostridia;o__Clostridiales;f__Lachnospiraceae;g__Coprococcus;s__unidentified_Coprococcus	0.8615381489211236
ASV_25954	d__Bacteria;p__Firmicutes;c__Clostridia;o__Clostridiales;f__Lachnospiraceae;g__unidentified_Lachnospiraceae;s__unidentified_Lachnospiraceae	0.9505012573529373
ASV_15275	d__Bacteria;p__Bacteroidetes;c__Bacteroidia;o__Bacteroidales;f__S24-7;g__unidentified_S24-7;s__unidentified_S24-7	0.9999995864594384
ASV_2903	d__Bacteria;p__Fusobacteria;c__Fusobacteriia;o__Fusobacteriales;f__Fusobacteriaceae;g__Cetobacterium;s__Cetobacterium_somerae	0.7806167070833102
ASV_3368	d__Bacteria;p__Bacteroidetes;c__Bacteroidia;o__Bacteroidales;f__S24-7;g__unidentified_S24-7;s__unidentified_S24-7	0.9999982875233567
ASV_23373	d__Bacteria;p__Firmicutes;c__Clostridia;o__Clostridiales;f__Lachnospiraceae;g__unclassified_Lachnospiraceae;s__unclassified_Lachnospiraceae	0.9915991418380992
ASV_5678	d__Bacteria;p__Bacteroidetes;c__Bacteroidia;o__Bacteroidales;f__[Paraprevotellaceae];g__Paraprevotella;s__unidentified_Paraprevotella	0.999997754724566
ASV_19934	d__Bacteria;p__Firmicutes;c__Clostridia;o__Clostridiales;f__unidentified_Clostridiales;g__unidentified_Clostridiales;s__unidentified_Clostridiales	0.9999472003259575
ASV_15723	d__Bacteria;p__Firmicutes;c__Clostridia;o__Clostridiales;f__Clostridiaceae;g__Clostridium;s__Clostridium_celatum	0.7387643408201291
ASV_25859	d__Bacteria;p__Firmicutes;c__Clostridia;o__Clostridiales;f__Lachnospiraceae;g__unidentified_Lachnospiraceae;s__unidentified_Lachnospiraceae	0.8166720234875924
ASV_165	d__Bacteria;p__Bacteroidetes;c__Bacteroidia;o__Bacteroidales;f__S24-7;g__unidentified_S24-7;s__unidentified_S24-7	0.999999690727483
ASV_2122	d__Bacteria;p__Bacteroidetes;c__Bacteroidia;o__Bacteroidales;f__unidentified_Bacteroidales;g__unidentified_Bacteroidales;s__unidentified_Bacteroidales	0.9997664732031557
ASV_14078	d__Bacteria;p__Firmicutes;c__Erysipelotrichi;o__Erysipelotrichales;f__Erysipelotrichaceae;g__Clostridium;s__Clostridium_saccharogumia	0.9916914027773683
ASV_23539	d__Bacteria;p__Firmicutes;c__Clostridia;o__Clostridiales;f__Peptococcaceae;g__rc4-4;s__unidentified_rc4-4	0.9999996429931242
ASV_14090	d__Bacteria;p__Bacteroidetes;c__Bacteroidia;o__Bacteroidales;f__S24-7;g__unidentified_S24-7;s__unidentified_S24-7	0.9999980065415147
ASV_17537	d__Bacteria;p__Actinobacteria;c__Actinobacteria;o__Actinomycetales;f__Nocardioidaceae;g__Nocardioides;s__unidentified_Nocardioides	0.9575180163656096
ASV_3498	d__Bacteria;p__Firmicutes;c__Clostridia;o__Clostridiales;f__Ruminococcaceae;g__Oscillospira;s__Oscillospira_guilliermondii	0.7435074061224324
ASV_1992	d__Bacteria;p__Firmicutes;c__Clostridia;o__Clostridiales;f__Ruminococcaceae;g__unidentified_Ruminococcaceae;s__unidentified_Ruminococcaceae	0.9464006829160423
ASV_13804	d__Bacteria;p__Firmicutes;c__Clostridia;o__Clostridiales;f__Peptostreptococcaceae;g__[Clostridium];s__[Clostridium]_glycolicum	0.8004344267344136
ASV_2714	d__Bacteria;p__Firmicutes;c__Clostridia;o__Clostridiales;f__Lachnospiraceae;g__unidentified_Lachnospiraceae;s__unidentified_Lachnospiraceae	0.8926752760930178
ASV_11995	d__Bacteria;p__Firmicutes;c__Clostridia;o__Clostridiales;f__Ruminococcaceae;g__unclassified_Ruminococcaceae;s__unclassified_Ruminococcaceae	0.9995010676838316
ASV_17857	d__Bacteria;p__Bacteroidetes;c__Bacteroidia;o__Bacteroidales;f__S24-7;g__unidentified_S24-7;s__unidentified_S24-7	0.9999983694836138
ASV_3966	d__Bacteria;p__Proteobacteria;c__Betaproteobacteria;o__Rhodocyclales;f__Rhodocyclaceae;g__Hydrogenophilus;s__unidentified_Hydrogenophilus	0.9999990746988221
ASV_9477	d__Bacteria;p__Firmicutes;c__Clostridia;o__Clostridiales;f__Clostridiaceae;g__SMB53;s__unidentified_SMB53	0.7764933302033026
ASV_13467	d__Bacteria;p__Firmicutes;c__Clostridia;o__Clostridiales;f__Ruminococcaceae;g__Oscillospira;s__unidentified_Oscillospira	0.9994043847708045
ASV_4441	d__Bacteria;p__Firmicutes;c__Clostridia;o__Clostridiales;f__Lachnospiraceae;g__Dorea;s__unidentified_Dorea	0.7911662217307928
ASV_9914	d__Bacteria;p__Firmicutes;c__Clostridia;o__Clostridiales;f__unidentified_Clostridiales;g__unidentified_Clostridiales;s__unidentified_Clostridiales	0.988587144727744
ASV_20170	d__Bacteria;p__Bacteroidetes;c__Bacteroidia;o__Bacteroidales;f__Rikenellaceae;g__unidentified_Rikenellaceae;s__unidentified_Rikenellaceae	0.9104913397068297
ASV_6943	d__Bacteria;p__Bacteroidetes;c__Bacteroidia;o__Bacteroidales;f__S24-7;g__unidentified_S24-7;s__unidentified_S24-7	0.9999999120444197
ASV_4449	d__Bacteria;p__Firmicutes;c__Clostridia;o__Clostridiales;f__Lachnospiraceae;g__Coprococcus;s__unidentified_Coprococcus	0.9243374364261023
ASV_20169	d__Bacteria;p__Firmicutes;c__Clostridia;o__Clostridiales;f__Lachnospiraceae;g__unclassified_Lachnospiraceae;s__unclassified_Lachnospiraceae	0.9597309210239346
ASV_25796	d__Bacteria;p__Firmicutes;c__Clostridia;o__Clostridiales;f__Lachnospiraceae;g__Blautia;s__unidentified_Blautia	0.8253160776100261
ASV_23844	d__Bacteria;p__Firmicutes;c__Clostridia;o__Clostridiales;f__Ruminococcaceae;g__Oscillospira;s__unidentified_Oscillospira	0.9999354435052599
ASV_14518	d__Bacteria;p__Firmicutes;c__Clostridia;o__Clostridiales;f__unidentified_Clostridiales;g__unidentified_Clostridiales;s__unidentified_Clostridiales	0.9999553614767989
ASV_355	d__Bacteria;p__Bacteroidetes;c__Bacteroidia;o__Bacteroidales;f__S24-7;g__unidentified_S24-7;s__unidentified_S24-7	0.999999970295534
ASV_25938	d__Bacteria;p__Firmicutes;c__Clostridia;o__Clostridiales;f__Christensenellaceae;g__unidentified_Christensenellaceae;s__unidentified_Christensenellaceae	0.9999988164640468
ASV_19256	d__Bacteria;p__Firmicutes;c__Clostridia;o__Clostridiales;f__Clostridiaceae;g__Proteiniclasticum;s__unidentified_Proteiniclasticum	0.9999984508764674
ASV_20575	d__Bacteria;p__Firmicutes;c__Clostridia;o__Clostridiales;f__Peptococcaceae;g__rc4-4;s__unidentified_rc4-4	0.9999990801366859
ASV_2882	d__Bacteria;p__Firmicutes;c__Clostridia;o__Clostridiales;f__Ruminococcaceae;g__Ruminococcus;s__unidentified_Ruminococcus	0.9998933634096927
ASV_18851	d__Bacteria;p__Firmicutes;c__Clostridia;o__Clostridiales;f__Ruminococcaceae;g__unidentified_Ruminococcaceae;s__unidentified_Ruminococcaceae	0.964506904250642
ASV_4153	d__Bacteria;p__Firmicutes;c__Clostridia;o__Clostridiales;f__[Mogibacteriaceae];g__unidentified_[Mogibacteriaceae];s__unidentified_[Mogibacteriaceae]	0.9974393727359876
ASV_1689	d__Bacteria;p__Firmicutes;c__Clostridia;o__Clostridiales;f__Peptostreptococcaceae;g__unidentified_Peptostreptococcaceae;s__unidentified_Peptostreptococcaceae	0.9621270796519659
ASV_25514	d__Bacteria;p__Proteobacteria;c__Betaproteobacteria;o__Burkholderiales;f__Burkholderiaceae;g__Burkholderia;s__unclassified_Burkholderia	0.9627796788564535
ASV_17748	d__Bacteria;p__Bacteroidetes;c__Bacteroidia;o__Bacteroidales;f__S24-7;g__unidentified_S24-7;s__unidentified_S24-7	0.9999983196998605
ASV_10577	d__Bacteria;p__Firmicutes;c__Clostridia;o__Clostridiales;f__unidentified_Clostridiales;g__unidentified_Clostridiales;s__unidentified_Clostridiales	0.9999729851081465
ASV_26402	d__Bacteria;p__Bacteroidetes;c__Bacteroidia;o__Bacteroidales;f__S24-7;g__unidentified_S24-7;s__unidentified_S24-7	0.9999998738302134
ASV_12909	d__Bacteria;p__Firmicutes;c__Clostridia;o__Clostridiales;f__Lachnospiraceae;g__Coprococcus;s__unidentified_Coprococcus	0.8446616377144724
ASV_2983	d__Bacteria;p__Proteobacteria;c__Gammaproteobacteria;o__Pseudomonadales;f__Moraxellaceae;g__Acinetobacter;s__unclassified_Acinetobacter	0.9999970557970868
ASV_8022	d__Bacteria;p__Bacteroidetes;c__Bacteroidia;o__Bacteroidales;f__S24-7;g__unidentified_S24-7;s__unidentified_S24-7	0.9999979230345528
ASV_11762	d__Bacteria;p__Actinobacteria;c__Actinobacteria;o__Bifidobacteriales;f__Bifidobacteriaceae;g__Bifidobacterium;s__unclassified_Bifidobacterium	0.998188847087258
ASV_19793	d__Bacteria;p__Bacteroidetes;c__Bacteroidia;o__Bacteroidales;f__S24-7;g__unidentified_S24-7;s__unidentified_S24-7	0.99999757412401
ASV_22998	d__Bacteria;p__Firmicutes;c__Clostridia;o__Clostridiales;f__unidentified_Clostridiales;g__unidentified_Clostridiales;s__unidentified_Clostridiales	0.8860026518651976
ASV_17701	d__Bacteria;p__Firmicutes;c__Clostridia;o__Clostridiales;f__Veillonellaceae;g__Phascolarctobacterium;s__unidentified_Phascolarctobacterium	0.9999999959401293
ASV_7564	d__Bacteria;p__Firmicutes;c__Clostridia;o__Clostridiales;f__Ruminococcaceae;g__unidentified_Ruminococcaceae;s__unidentified_Ruminococcaceae	0.9526632521631629
ASV_13294	d__Bacteria;p__Bacteroidetes;c__Bacteroidia;o__Bacteroidales;f__[Odoribacteraceae];g__Butyricimonas;s__unidentified_Butyricimonas	1.0
ASV_11496	d__Bacteria;p__Firmicutes;c__Clostridia;o__Clostridiales;f__Clostridiaceae;g__Clostridium;s__unclassified_Clostridium	0.8405702607253273
ASV_1157	d__Bacteria;p__Firmicutes;c__Clostridia;o__Clostridiales;f__Lachnospiraceae;g__Coprococcus;s__unidentified_Coprococcus	0.9918020124472602
ASV_12407	d__Bacteria;p__Firmicutes;c__Clostridia;o__Clostridiales;f__Lachnospiraceae;g__Coprococcus;s__unidentified_Coprococcus	0.9856967866342019
ASV_11648	d__Bacteria;p__Firmicutes;c__Bacilli;o__Lactobacillales;f__Lactobacillaceae;g__Lactobacillus;s__unclassified_Lactobacillus	0.9999996295612383
ASV_7681	d__Bacteria;p__Firmicutes;c__Clostridia;o__Clostridiales;f__Ruminococcaceae;g__Oscillospira;s__unidentified_Oscillospira	0.9998745427210417
ASV_9493	d__Bacteria;p__Bacteroidetes;c__Bacteroidia;o__Bacteroidales;f__S24-7;g__unidentified_S24-7;s__unidentified_S24-7	0.9999957219712589
ASV_24679	d__Bacteria;p__Firmicutes;c__Clostridia;o__Clostridiales;f__unidentified_Clostridiales;g__unidentified_Clostridiales;s__unidentified_Clostridiales	0.9999371849438872
ASV_3106	d__Bacteria;p__Bacteroidetes;c__Bacteroidia;o__Bacteroidales;f__S24-7;g__unidentified_S24-7;s__unidentified_S24-7	0.9999999569397753
ASV_3471	d__Bacteria;p__Firmicutes;c__Clostridia;o__Clostridiales;f__Ruminococcaceae;g__Oscillospira;s__unidentified_Oscillospira	0.9987326325264944
ASV_11577	d__Bacteria;p__Proteobacteria;c__Alphaproteobacteria;o__Rhizobiales;f__Bradyrhizobiaceae;g__unclassified_Bradyrhizobiaceae;s__unclassified_Bradyrhizobiaceae	0.9999867123648695
ASV_11126	d__Bacteria;p__Firmicutes;c__Clostridia;o__Clostridiales;f__[Mogibacteriaceae];g__unidentified_[Mogibacteriaceae];s__unidentified_[Mogibacteriaceae]	0.9999879691092518
ASV_15586	d__Bacteria;p__Firmicutes;c__Clostridia;o__Clostridiales;f__Ruminococcaceae;g__unidentified_Ruminococcaceae;s__unidentified_Ruminococcaceae	0.9889324783481582
ASV_25078	d__Bacteria;p__Bacteroidetes;c__Bacteroidia;o__Bacteroidales;f__S24-7;g__unidentified_S24-7;s__unidentified_S24-7	0.9999981269768261
ASV_9204	d__Bacteria;p__Firmicutes;c__Clostridia;o__Clostridiales;f__Ruminococcaceae;g__unclassified_Ruminococcaceae;s__unclassified_Ruminococcaceae	0.9999690675818367
ASV_5018	d__Bacteria;p__Firmicutes;c__Clostridia;o__Clostridiales;f__[Mogibacteriaceae];g__unidentified_[Mogibacteriaceae];s__unidentified_[Mogibacteriaceae]	0.9998487474867291
ASV_4899	d__Bacteria;p__Firmicutes;c__Clostridia;o__Clostridiales;f__unidentified_Clostridiales;g__unidentified_Clostridiales;s__unidentified_Clostridiales	0.959306957612154
ASV_21227	d__Bacteria;p__Firmicutes;c__Clostridia;o__Clostridiales;f__Ruminococcaceae;g__Oscillospira;s__unidentified_Oscillospira	0.9991355406997948
ASV_23801	d__Bacteria;p__Firmicutes;c__Clostridia;o__Clostridiales;f__Ruminococcaceae;g__Oscillospira;s__unidentified_Oscillospira	0.9881010584903236
ASV_25114	d__Bacteria;p__Proteobacteria;c__Gammaproteobacteria;o__Enterobacteriales;f__Enterobacteriaceae;g__unclassified_Enterobacteriaceae;s__unclassified_Enterobacteriaceae	0.9999733117987193
ASV_590	d__Bacteria;p__Bacteroidetes;c__Bacteroidia;o__Bacteroidales;f__S24-7;g__unidentified_S24-7;s__unidentified_S24-7	0.9999999968206623
ASV_1150	d__Bacteria;p__Firmicutes;c__Clostridia;o__Clostridiales;f__Peptostreptococcaceae;g__unclassified_Peptostreptococcaceae;s__unclassified_Peptostreptococcaceae	0.9795477230803705
ASV_12763	d__Bacteria;p__Firmicutes;c__Clostridia;o__Clostridiales;f__Clostridiaceae;g__Proteiniclasticum;s__unidentified_Proteiniclasticum	0.999998724041252
ASV_2859	d__Bacteria;p__Firmicutes;c__Clostridia;o__Clostridiales;f__Ruminococcaceae;g__Oscillospira;s__unidentified_Oscillospira	0.995117344236975
ASV_6371	d__Bacteria;p__Firmicutes;c__Clostridia;o__Clostridiales;f__unidentified_Clostridiales;g__unidentified_Clostridiales;s__unidentified_Clostridiales	0.999853014712008
ASV_19643	d__Bacteria;p__Firmicutes;c__Clostridia;o__Clostridiales;f__Lachnospiraceae;g__unidentified_Lachnospiraceae;s__unidentified_Lachnospiraceae	0.9502220778265332
ASV_5891	d__Bacteria;p__Firmicutes;c__Clostridia;o__Clostridiales;f__Clostridiaceae;g__Clostridium;s__Clostridium_baratii	0.8774962217824944
ASV_16869	d__Bacteria;p__Bacteroidetes;c__Bacteroidia;o__Bacteroidales;f__S24-7;g__unidentified_S24-7;s__unidentified_S24-7	0.9999986905809
ASV_13732	d__Bacteria;p__Spirochaetes;c__Spirochaetes;o__Spirochaetales;f__Spirochaetaceae;g__Treponema;s__unidentified_Treponema	0.9999999676274746
ASV_17235	d__Bacteria;p__Firmicutes;c__Clostridia;o__Clostridiales;f__Ruminococcaceae;g__unidentified_Ruminococcaceae;s__unidentified_Ruminococcaceae	0.9956871703241
ASV_8645	d__Bacteria;p__Firmicutes;c__Clostridia;o__Clostridiales;f__Clostridiaceae;g__Clostridium;s__unclassified_Clostridium	0.9259273431889835
ASV_17326	d__Bacteria;p__Proteobacteria;c__Gammaproteobacteria;o__Enterobacteriales;f__Enterobacteriaceae;g__unclassified_Enterobacteriaceae;s__unclassified_Enterobacteriaceae	0.9999752797169688
ASV_23627	d__Bacteria;p__Firmicutes;c__Clostridia;o__Clostridiales;f__unidentified_Clostridiales;g__unidentified_Clostridiales;s__unidentified_Clostridiales	0.995365294411846
ASV_16166	d__Bacteria;p__Firmicutes;c__Clostridia;o__Clostridiales;f__unclassified_Clostridiales;g__unclassified_Clostridiales;s__unclassified_Clostridiales	0.9999999999760423
ASV_4246	d__Bacteria;p__Firmicutes;c__Clostridia;o__Clostridiales;f__Christensenellaceae;g__unidentified_Christensenellaceae;s__unidentified_Christensenellaceae	0.9999997920993667
ASV_10858	d__Bacteria;p__Firmicutes;c__Clostridia;o__Clostridiales;f__Lachnospiraceae;g__Coprococcus;s__unidentified_Coprococcus	0.7827646791394282
ASV_16590	d__Bacteria;p__Firmicutes;c__Clostridia;o__Clostridiales;f__Lachnospiraceae;g__Roseburia;s__unidentified_Roseburia	0.8648569184967899
ASV_24192	d__Bacteria;p__Bacteroidetes;c__Bacteroidia;o__Bacteroidales;f__Rikenellaceae;g__unidentified_Rikenellaceae;s__unidentified_Rikenellaceae	0.9464521276017647
ASV_14646	d__Bacteria;p__Firmicutes;c__Clostridia;o__Clostridiales;f__Ruminococcaceae;g__Ruminococcus;s__Ruminococcus_flavefaciens	0.9999962125469425
ASV_15589	d__Bacteria;p__Firmicutes;c__Clostridia;o__Clostridiales;f__Ruminococcaceae;g__Ruminococcus;s__unidentified_Ruminococcus	0.9998779093025094
ASV_2007	d__Bacteria;p__Cyanobacteria;c__Chloroplast;o__Streptophyta;f__unidentified_Streptophyta;g__unidentified_Streptophyta;s__unidentified_Streptophyta	0.9999999998011333
ASV_4893	d__Bacteria;p__Firmicutes;c__Clostridia;o__Clostridiales;f__Lachnospiraceae;g__unidentified_Lachnospiraceae;s__unidentified_Lachnospiraceae	0.958750033213629
ASV_20600	d__Bacteria;p__Firmicutes;c__Clostridia;o__Clostridiales;f__Lachnospiraceae;g__unclassified_Lachnospiraceae;s__unclassified_Lachnospiraceae	0.9913633906731623
ASV_23981	d__Bacteria;p__Firmicutes;c__Clostridia;o__Clostridiales;f__[Mogibacteriaceae];g__unidentified_[Mogibacteriaceae];s__unidentified_[Mogibacteriaceae]	0.9999970692911717
ASV_1419	d__Bacteria;p__Bacteroidetes;c__Bacteroidia;o__Bacteroidales;f__Rikenellaceae;g__unidentified_Rikenellaceae;s__unidentified_Rikenellaceae	0.8287126055660446
ASV_24091	d__Bacteria;p__Firmicutes;c__Clostridia;o__Clostridiales;f__Clostridiaceae;g__Clostridium;s__unclassified_Clostridium	0.8591976363581623
ASV_13168	d__Bacteria;p__Firmicutes;c__Clostridia;o__Clostridiales;f__unclassified_Clostridiales;g__unclassified_Clostridiales;s__unclassified_Clostridiales	0.9999999986306132
ASV_13028	d__Bacteria;p__Firmicutes;c__Clostridia;o__Clostridiales;f__Christensenellaceae;g__unidentified_Christensenellaceae;s__unidentified_Christensenellaceae	0.8720368757699425
ASV_5506	d__Bacteria;p__Firmicutes;c__Clostridia;o__Clostridiales;f__Christensenellaceae;g__unidentified_Christensenellaceae;s__unidentified_Christensenellaceae	0.9999987478304201
ASV_9497	d__Bacteria;p__Firmicutes;c__Clostridia;o__Clostridiales;f__unidentified_Clostridiales;g__unidentified_Clostridiales;s__unidentified_Clostridiales	0.9964427815454445
ASV_19944	d__Bacteria;p__Firmicutes;c__Clostridia;o__Clostridiales;f__unidentified_Clostridiales;g__unidentified_Clostridiales;s__unidentified_Clostridiales	0.999990395398068
ASV_24125	d__Bacteria;p__Bacteroidetes;c__Bacteroidia;o__Bacteroidales;f__unidentified_Bacteroidales;g__unidentified_Bacteroidales;s__unidentified_Bacteroidales	0.9999998245758815
ASV_19845	d__Bacteria;p__Proteobacteria;c__Betaproteobacteria;o__Burkholderiales;f__Alcaligenaceae;g__Sutterella;s__unidentified_Sutterella	0.9976851476521492
ASV_4022	d__Bacteria;p__Actinobacteria;c__Actinobacteria;o__Actinomycetales;f__Nocardioidaceae;g__Nocardioides;s__unidentified_Nocardioides	0.9781285934310912
ASV_20183	d__Bacteria;p__Firmicutes;c__Clostridia;o__Clostridiales;f__unidentified_Clostridiales;g__unidentified_Clostridiales;s__unidentified_Clostridiales	0.9926252931579481
ASV_10284	d__Bacteria;p__Firmicutes;c__Bacilli;o__Bacillales;f__Bacillaceae;g__unidentified_Bacillaceae;s__unidentified_Bacillaceae	0.8857258651241906
ASV_5362	d__Bacteria;p__Firmicutes;c__Clostridia;o__Clostridiales;f__unidentified_Clostridiales;g__unidentified_Clostridiales;s__unidentified_Clostridiales	0.999870126402634
ASV_11616	d__Bacteria;p__Firmicutes;c__Clostridia;o__Clostridiales;f__Lachnospiraceae;g__unidentified_Lachnospiraceae;s__unidentified_Lachnospiraceae	0.782091370987274
ASV_17012	d__Bacteria;p__Firmicutes;c__Clostridia;o__Clostridiales;f__Ruminococcaceae;g__unclassified_Ruminococcaceae;s__unclassified_Ruminococcaceae	0.9994631745716852
ASV_10717	d__Bacteria;p__Firmicutes;c__Bacilli;o__Bacillales;f__Bacillaceae;g__Bacillus;s__Bacillus_thermoamylovorans	0.9990751737070069
ASV_13321	d__Bacteria;p__Firmicutes;c__Bacilli;o__Bacillales;f__Bacillaceae;g__Bacillus;s__Bacillus_flexus	0.9950136122069296
ASV_17836	d__Bacteria;p__Firmicutes;c__Clostridia;o__Clostridiales;f__unidentified_Clostridiales;g__unidentified_Clostridiales;s__unidentified_Clostridiales	0.9533774435790359
ASV_891	d__Bacteria;p__Bacteroidetes;c__Bacteroidia;o__Bacteroidales;f__[Paraprevotellaceae];g__YRC22;s__unidentified_YRC22	0.9999999035172824
ASV_7212	d__Bacteria;p__Firmicutes;c__Clostridia;o__Clostridiales;f__Ruminococcaceae;g__unclassified_Ruminococcaceae;s__unclassified_Ruminococcaceae	0.9994189656743426
ASV_1791	d__Bacteria;p__Firmicutes;c__Clostridia;o__Clostridiales;f__Ruminococcaceae;g__unidentified_Ruminococcaceae;s__unidentified_Ruminococcaceae	0.9921087762110692
ASV_23321	d__Bacteria;p__Firmicutes;c__Clostridia;o__Clostridiales;f__Ruminococcaceae;g__unidentified_Ruminococcaceae;s__unidentified_Ruminococcaceae	0.9928297230887563
ASV_474	d__Bacteria;p__Firmicutes;c__Clostridia;o__Clostridiales;f__unidentified_Clostridiales;g__unidentified_Clostridiales;s__unidentified_Clostridiales	0.9913558933711678
ASV_17964	d__Bacteria;p__Firmicutes;c__Clostridia;o__Clostridiales;f__Lachnospiraceae;g__Anaerostipes;s__unidentified_Anaerostipes	0.9993941367748261
ASV_19733	d__Bacteria;p__Firmicutes;c__Clostridia;o__Clostridiales;f__Lachnospiraceae;g__unidentified_Lachnospiraceae;s__unidentified_Lachnospiraceae	0.9240947819693252
ASV_2428	d__Bacteria;p__Firmicutes;c__Clostridia;o__Clostridiales;f__Lachnospiraceae;g__[Ruminococcus];s__[Ruminococcus]_gnavus	0.9976486639915445
ASV_19569	d__Bacteria;p__Actinobacteria;c__Actinobacteria;o__Bifidobacteriales;f__Bifidobacteriaceae;g__Bifidobacterium;s__Bifidobacterium_pseudolongum	0.9787433515037219
ASV_17749	d__Bacteria;p__Bacteroidetes;c__Bacteroidia;o__Bacteroidales;f__Porphyromonadaceae;g__Parabacteroides;s__Parabacteroides_distasonis	0.9999975073817866
ASV_1701	d__Bacteria;p__Firmicutes;c__Clostridia;o__Clostridiales;f__Lachnospiraceae;g__Coprococcus;s__unidentified_Coprococcus	0.9950094574435264
ASV_18048	d__Bacteria;p__Firmicutes;c__Bacilli;o__Lactobacillales;f__Lactobacillaceae;g__Lactobacillus;s__Lactobacillus_paralimentarius	0.9999996141536547
ASV_5153	d__Bacteria;p__Firmicutes;c__Clostridia;o__Clostridiales;f__unidentified_Clostridiales;g__unidentified_Clostridiales;s__unidentified_Clostridiales	0.9965063918604251
ASV_8011	d__Bacteria;p__Proteobacteria;c__Gammaproteobacteria;o__Pseudomonadales;f__Moraxellaceae;g__Acinetobacter;s__unclassified_Acinetobacter	0.9999792737381263
ASV_13273	d__Bacteria;p__Firmicutes;c__Clostridia;o__Clostridiales;f__Ruminococcaceae;g__unidentified_Ruminococcaceae;s__unidentified_Ruminococcaceae	0.9080773595103129
ASV_18607	d__Bacteria;p__Actinobacteria;c__Coriobacteriia;o__Coriobacteriales;f__Coriobacteriaceae;g__Adlercreutzia;s__unidentified_Adlercreutzia	0.9999688524447029
ASV_3268	d__Bacteria;p__Proteobacteria;c__Gammaproteobacteria;o__Xanthomonadales;f__Xanthomonadaceae;g__Rhodanobacter;s__unclassified_Rhodanobacter	0.9994108140755216
ASV_21828	d__Bacteria;p__Firmicutes;c__Clostridia;o__Clostridiales;f__unidentified_Clostridiales;g__unidentified_Clostridiales;s__unidentified_Clostridiales	0.999978968184075
ASV_12684	d__Bacteria;p__Firmicutes;c__Clostridia;o__Clostridiales;f__Christensenellaceae;g__unidentified_Christensenellaceae;s__unidentified_Christensenellaceae	0.9862617224473601
ASV_7670	d__Bacteria;p__Bacteroidetes;c__Bacteroidia;o__Bacteroidales;f__S24-7;g__unidentified_S24-7;s__unidentified_S24-7	0.9999999964798008
ASV_15572	d__Bacteria;p__Firmicutes;c__Clostridia;o__Clostridiales;f__Lachnospiraceae;g__unclassified_Lachnospiraceae;s__unclassified_Lachnospiraceae	0.8352764058609905
ASV_26053	d__Bacteria;p__Proteobacteria;c__Gammaproteobacteria;o__Enterobacteriales;f__Enterobacteriaceae;g__Plesiomonas;s__unclassified_Plesiomonas	0.7061717566981376
ASV_20740	d__Bacteria;p__Firmicutes;c__Clostridia;o__Clostridiales;f__Ruminococcaceae;g__Oscillospira;s__unidentified_Oscillospira	0.957382014575799
ASV_9637	d__Bacteria;p__Firmicutes;c__Clostridia;o__Clostridiales;f__Clostridiaceae;g__Proteiniclasticum;s__unidentified_Proteiniclasticum	0.9999992428353461
ASV_353	d__Bacteria;p__Bacteroidetes;c__Bacteroidia;o__Bacteroidales;f__unidentified_Bacteroidales;g__unidentified_Bacteroidales;s__unidentified_Bacteroidales	0.9999618208770137
ASV_10116	d__Bacteria;p__Firmicutes;c__Bacilli;o__Lactobacillales;f__Lactobacillaceae;g__Lactobacillus;s__unclassified_Lactobacillus	0.9999995986856398
ASV_21751	d__Bacteria;p__Proteobacteria;c__Alphaproteobacteria;o__Rhodobacterales;f__Rhodobacteraceae;g__Paracoccus;s__Paracoccus_aminovorans	0.7747997062122729
ASV_2489	d__Bacteria;p__Firmicutes;c__Clostridia;o__Clostridiales;f__Ruminococcaceae;g__Oscillospira;s__unidentified_Oscillospira	0.9999653424291152
ASV_1044	d__Bacteria;p__Firmicutes;c__Clostridia;o__Clostridiales;f__Ruminococcaceae;g__unidentified_Ruminococcaceae;s__unidentified_Ruminococcaceae	0.9914151757898355
ASV_4147	d__Bacteria;p__Firmicutes;c__Bacilli;o__Turicibacterales;f__Turicibacteraceae;g__Turicibacter;s__unidentified_Turicibacter	0.9999999799957211
ASV_5420	d__Bacteria;p__Bacteroidetes;c__Bacteroidia;o__Bacteroidales;f__Bacteroidaceae;g__Bacteroides;s__unidentified_Bacteroides	0.9295571506643288
ASV_10132	d__Bacteria;p__TM7;c__TM7-3;o__CW040;f__F16;g__unidentified_F16;s__unidentified_F16	0.9999999814341438
ASV_14676	d__Bacteria;p__Firmicutes;c__Clostridia;o__Clostridiales;f__Ruminococcaceae;g__unidentified_Ruminococcaceae;s__unidentified_Ruminococcaceae	0.9978638965768221
ASV_24046	d__Bacteria;p__Firmicutes;c__Clostridia;o__Clostridiales;f__unidentified_Clostridiales;g__unidentified_Clostridiales;s__unidentified_Clostridiales	0.999910856773024
ASV_20639	d__Bacteria;p__Firmicutes;c__Clostridia;o__Clostridiales;f__Lachnospiraceae;g__unidentified_Lachnospiraceae;s__unidentified_Lachnospiraceae	0.7488503390996697
ASV_7150	d__Bacteria;p__Firmicutes;c__Clostridia;o__Clostridiales;f__unidentified_Clostridiales;g__unidentified_Clostridiales;s__unidentified_Clostridiales	0.8823879315163883
ASV_23090	d__Bacteria;p__Firmicutes;c__Clostridia;o__Clostridiales;f__unidentified_Clostridiales;g__unidentified_Clostridiales;s__unidentified_Clostridiales	0.9979687164078564
ASV_22524	d__Bacteria;p__Firmicutes;c__Clostridia;o__Clostridiales;f__Ruminococcaceae;g__Oscillospira;s__unidentified_Oscillospira	0.9977392247511601
ASV_19021	d__Bacteria;p__Firmicutes;c__Clostridia;o__Clostridiales;f__Ruminococcaceae;g__Oscillospira;s__unidentified_Oscillospira	0.9984819135159764
ASV_25260	d__Bacteria;p__Proteobacteria;c__Gammaproteobacteria;o__Pseudomonadales;f__Moraxellaceae;g__Acinetobacter;s__Acinetobacter_johnsonii	0.9006881792342032
ASV_16007	d__Bacteria;p__Proteobacteria;c__Gammaproteobacteria;o__Pseudomonadales;f__Moraxellaceae;g__Acinetobacter;s__Acinetobacter_johnsonii	0.8639326111627949
ASV_23530	d__Bacteria;p__Firmicutes;c__Bacilli;o__Lactobacillales;f__Streptococcaceae;g__Streptococcus;s__Streptococcus_luteciae	0.8109255300326362
ASV_20649	d__Bacteria;p__Proteobacteria;c__Gammaproteobacteria;o__Pseudomonadales;f__Moraxellaceae;g__Acinetobacter;s__unclassified_Acinetobacter	0.999997901881599
ASV_13726	d__Bacteria;p__Actinobacteria;c__Thermoleophilia;o__Gaiellales;f__Gaiellaceae;g__unidentified_Gaiellaceae;s__unidentified_Gaiellaceae	0.9993511020410184
ASV_21947	d__Bacteria;p__Firmicutes;c__Clostridia;o__Clostridiales;f__Lachnospiraceae;g__Blautia;s__unidentified_Blautia	0.9821888489023797
ASV_25016	d__Bacteria;p__Bacteroidetes;c__Bacteroidia;o__Bacteroidales;f__S24-7;g__unidentified_S24-7;s__unidentified_S24-7	0.9999991079428696
ASV_26448	d__Bacteria;p__Firmicutes;c__Clostridia;o__Clostridiales;f__Lachnospiraceae;g__unidentified_Lachnospiraceae;s__unidentified_Lachnospiraceae	0.9473008456868713
ASV_14426	d__Bacteria;p__Bacteroidetes;c__Bacteroidia;o__Bacteroidales;f__S24-7;g__unidentified_S24-7;s__unidentified_S24-7	0.9999987502643386
ASV_7600	d__Bacteria;p__Firmicutes;c__Clostridia;o__Clostridiales;f__[Mogibacteriaceae];g__unidentified_[Mogibacteriaceae];s__unidentified_[Mogibacteriaceae]	0.999983018328926
ASV_1265	d__Bacteria;p__Bacteroidetes;c__Bacteroidia;o__Bacteroidales;f__unidentified_Bacteroidales;g__unidentified_Bacteroidales;s__unidentified_Bacteroidales	0.9783891450345841
ASV_11575	d__Bacteria;p__Firmicutes;c__Clostridia;o__Clostridiales;f__Ruminococcaceae;g__unidentified_Ruminococcaceae;s__unidentified_Ruminococcaceae	0.987377024854232
ASV_9189	d__Bacteria;p__Proteobacteria;c__Alphaproteobacteria;o__Rhizobiales;f__Hyphomicrobiaceae;g__Rhodoplanes;s__unidentified_Rhodoplanes	0.9999517343814417
ASV_4830	d__Bacteria;p__Firmicutes;c__Bacilli;o__Lactobacillales;f__Lactobacillaceae;g__Lactobacillus;s__unclassified_Lactobacillus	0.8578379591064874
ASV_24761	d__Bacteria;p__Firmicutes;c__Clostridia;o__Clostridiales;f__Clostridiaceae;g__Clostridium;s__Clostridium_baratii	0.8109161793402744
ASV_21414	d__Bacteria;p__Firmicutes;c__Clostridia;o__Clostridiales;f__Ruminococcaceae;g__Oscillospira;s__unidentified_Oscillospira	0.9997841386897146
ASV_7841	d__Bacteria;p__Proteobacteria;c__Gammaproteobacteria;o__Enterobacteriales;f__Enterobacteriaceae;g__unclassified_Enterobacteriaceae;s__unclassified_Enterobacteriaceae	0.9999706988289243
ASV_9280	d__Bacteria;p__Proteobacteria;c__Alphaproteobacteria;o__Sphingomonadales;f__Sphingomonadaceae;g__Sphingomonas;s__Sphingomonas_yabuuchiae	0.9854382467695229
ASV_10937	d__Bacteria;p__Firmicutes;c__Clostridia;o__Clostridiales;f__Lachnospiraceae;g__unidentified_Lachnospiraceae;s__unidentified_Lachnospiraceae	0.93520188872
ASV_3382	d__Bacteria;p__Bacteroidetes;c__Bacteroidia;o__Bacteroidales;f__S24-7;g__unidentified_S24-7;s__unidentified_S24-7	0.9999982446524088
ASV_7073	d__Bacteria;p__Actinobacteria;c__Actinobacteria;o__Bifidobacteriales;f__Bifidobacteriaceae;g__Bifidobacterium;s__Bifidobacterium_pseudolongum	0.9969294334583754
ASV_19678	d__Bacteria;p__Firmicutes;c__Clostridia;o__Clostridiales;f__Lachnospiraceae;g__unidentified_Lachnospiraceae;s__unidentified_Lachnospiraceae	0.8200499855119286
ASV_7568	d__Bacteria;p__Firmicutes;c__Bacilli;o__Lactobacillales;f__Lactobacillaceae;g__Lactobacillus;s__unclassified_Lactobacillus	0.8499862445274858
ASV_1768	d__Bacteria;p__Proteobacteria;c__Gammaproteobacteria;o__Enterobacteriales;f__Enterobacteriaceae;g__Plesiomonas;s__unclassified_Plesiomonas	0.7310796982822088
ASV_16174	d__Bacteria;p__Bacteroidetes;c__Bacteroidia;o__Bacteroidales;f__unidentified_Bacteroidales;g__unidentified_Bacteroidales;s__unidentified_Bacteroidales	0.9999863577151059
ASV_22858	d__Bacteria;p__Firmicutes;c__Clostridia;o__Clostridiales;f__Ruminococcaceae;g__unidentified_Ruminococcaceae;s__unidentified_Ruminococcaceae	0.8272674778023039
ASV_6117	d__Bacteria;p__Firmicutes;c__Clostridia;o__Clostridiales;f__unidentified_Clostridiales;g__unidentified_Clostridiales;s__unidentified_Clostridiales	0.9990454190362463
ASV_10130	d__Bacteria;p__Proteobacteria;c__Gammaproteobacteria;o__Aeromonadales;f__Succinivibrionaceae;g__Succinivibrio;s__unidentified_Succinivibrio	0.9999999994250004
ASV_22281	d__Bacteria;p__Firmicutes;c__Clostridia;o__Clostridiales;f__Lachnospiraceae;g__unclassified_Lachnospiraceae;s__unclassified_Lachnospiraceae	0.8416572254578453
ASV_14115	d__Bacteria;p__Firmicutes;c__Clostridia;o__Clostridiales;f__Lachnospiraceae;g__unclassified_Lachnospiraceae;s__unclassified_Lachnospiraceae	0.8247430138548653
ASV_25259	d__Bacteria;p__Firmicutes;c__Clostridia;o__Clostridiales;f__unidentified_Clostridiales;g__unidentified_Clostridiales;s__unidentified_Clostridiales	0.9969737181810455
ASV_19855	d__Bacteria;p__Firmicutes;c__Clostridia;o__Clostridiales;f__Ruminococcaceae;g__unidentified_Ruminococcaceae;s__unidentified_Ruminococcaceae	0.9996132211688934
ASV_23079	d__Bacteria;p__Firmicutes;c__Clostridia;o__Clostridiales;f__Lachnospiraceae;g__unidentified_Lachnospiraceae;s__unidentified_Lachnospiraceae	0.9031363481716861
ASV_4628	d__Bacteria;p__Firmicutes;c__Clostridia;o__Clostridiales;f__Ruminococcaceae;g__Oscillospira;s__unidentified_Oscillospira	0.9884826553077046
ASV_18392	d__Bacteria;p__Firmicutes;c__Bacilli;o__Lactobacillales;f__Lactobacillaceae;g__Lactobacillus;s__Lactobacillus_vaginalis	0.7863093805375088
ASV_17878	d__Bacteria;p__Firmicutes;c__Clostridia;o__Clostridiales;f__Ruminococcaceae;g__unidentified_Ruminococcaceae;s__unidentified_Ruminococcaceae	0.9842788997843434
ASV_5836	d__Bacteria;p__Bacteroidetes;c__Bacteroidia;o__Bacteroidales;f__S24-7;g__unidentified_S24-7;s__unidentified_S24-7	0.9999999665197384
ASV_10660	d__Bacteria;p__Bacteroidetes;c__Bacteroidia;o__Bacteroidales;f__S24-7;g__unidentified_S24-7;s__unidentified_S24-7	0.9999999630918246
ASV_19800	d__Bacteria;p__Firmicutes;c__Clostridia;o__Clostridiales;f__Lachnospiraceae;g__unclassified_Lachnospiraceae;s__unclassified_Lachnospiraceae	0.9735550505720916
ASV_7115	d__Bacteria;p__Bacteroidetes;c__Bacteroidia;o__Bacteroidales;f__Rikenellaceae;g__unidentified_Rikenellaceae;s__unidentified_Rikenellaceae	0.769961895968118
ASV_19922	d__Bacteria;p__Bacteroidetes;c__Bacteroidia;o__Bacteroidales;f__S24-7;g__unidentified_S24-7;s__unidentified_S24-7	0.9999999506929113
ASV_4209	d__Bacteria;p__Firmicutes;c__Clostridia;o__Clostridiales;f__Ruminococcaceae;g__Oscillospira;s__unidentified_Oscillospira	0.9991672848942474
ASV_13156	d__Bacteria;p__Firmicutes;c__Clostridia;o__Clostridiales;f__Ruminococcaceae;g__Oscillospira;s__unidentified_Oscillospira	0.9918593504256399
ASV_9927	d__Bacteria;p__Firmicutes;c__Clostridia;o__Clostridiales;f__unidentified_Clostridiales;g__unidentified_Clostridiales;s__unidentified_Clostridiales	0.9958952957960819
ASV_22608	d__Bacteria;p__Bacteroidetes;c__Bacteroidia;o__Bacteroidales;f__Bacteroidaceae;g__Bacteroides;s__unidentified_Bacteroides	0.9999996715003447
ASV_5801	d__Bacteria;p__Firmicutes;c__Clostridia;o__Clostridiales;f__Clostridiaceae;g__SMB53;s__unidentified_SMB53	0.9315527771006346
ASV_17872	d__Bacteria;p__Proteobacteria;c__Gammaproteobacteria;o__Xanthomonadales;f__Xanthomonadaceae;g__unidentified_Xanthomonadaceae;s__unidentified_Xanthomonadaceae	0.990351805409849
ASV_204	d__Bacteria;p__Firmicutes;c__Bacilli;o__Lactobacillales;f__Lactobacillaceae;g__unclassified_Lactobacillaceae;s__unclassified_Lactobacillaceae	0.9966623631730029
ASV_27	d__Bacteria;p__Bacteroidetes;c__Bacteroidia;o__Bacteroidales;f__S24-7;g__unidentified_S24-7;s__unidentified_S24-7	0.9999999001935912
ASV_145	d__Bacteria;p__Firmicutes;c__Clostridia;o__Clostridiales;f__Ruminococcaceae;g__Oscillospira;s__unidentified_Oscillospira	0.99839719879442
ASV_23575	d__Bacteria;p__Firmicutes;c__Clostridia;o__Clostridiales;f__Ruminococcaceae;g__Oscillospira;s__unidentified_Oscillospira	0.9980788617842369
ASV_10865	d__Bacteria;p__Firmicutes;c__Clostridia;o__Clostridiales;f__Ruminococcaceae;g__Oscillospira;s__unidentified_Oscillospira	0.9926181857799271
ASV_7314	d__Bacteria;p__Spirochaetes;c__Spirochaetes;o__Spirochaetales;f__Spirochaetaceae;g__Treponema;s__unidentified_Treponema	0.9999999949219216
ASV_23018	d__Bacteria;p__Firmicutes;c__Clostridia;o__Clostridiales;f__Ruminococcaceae;g__Oscillospira;s__unidentified_Oscillospira	0.9975686187730162
ASV_25463	d__Bacteria;p__Firmicutes;c__Clostridia;o__Clostridiales;f__Ruminococcaceae;g__Ruminococcus;s__unidentified_Ruminococcus	0.9146243527742257
ASV_8903	d__Bacteria;p__Proteobacteria;c__Gammaproteobacteria;o__Xanthomonadales;f__Xanthomonadaceae;g__unidentified_Xanthomonadaceae;s__unidentified_Xanthomonadaceae	0.9917960398875261
ASV_2362	d__Bacteria;p__Firmicutes;c__Clostridia;o__Clostridiales;f__Ruminococcaceae;g__unidentified_Ruminococcaceae;s__unidentified_Ruminococcaceae	0.8396425422414773
ASV_10856	d__Bacteria;p__Proteobacteria;c__Gammaproteobacteria;o__Xanthomonadales;f__Xanthomonadaceae;g__Rhodanobacter;s__unclassified_Rhodanobacter	0.9934055468308189
ASV_23070	d__Bacteria;p__Proteobacteria;c__Gammaproteobacteria;o__Enterobacteriales;f__Enterobacteriaceae;g__Plesiomonas;s__unclassified_Plesiomonas	0.7370715670045702
ASV_3741	d__Bacteria;p__Firmicutes;c__Clostridia;o__Clostridiales;f__[Mogibacteriaceae];g__unidentified_[Mogibacteriaceae];s__unidentified_[Mogibacteriaceae]	0.9990400685534484
ASV_21931	d__Bacteria;p__Firmicutes;c__Clostridia;o__Clostridiales;f__unidentified_Clostridiales;g__unidentified_Clostridiales;s__unidentified_Clostridiales	0.999973993029667
ASV_18600	d__Bacteria;p__Firmicutes;c__Clostridia;o__Clostridiales;f__unidentified_Clostridiales;g__unidentified_Clostridiales;s__unidentified_Clostridiales	0.9999725365097172
ASV_22857	d__Bacteria;p__Bacteroidetes;c__Bacteroidia;o__Bacteroidales;f__S24-7;g__unidentified_S24-7;s__unidentified_S24-7	0.9999984440001866
ASV_12347	d__Bacteria;p__Firmicutes;c__Clostridia;o__Clostridiales;f__Ruminococcaceae;g__Oscillospira;s__unidentified_Oscillospira	0.9995532639194535
ASV_7659	d__Bacteria;p__Nitrospirae;c__Nitrospira;o__Nitrospirales;f__[Thermodesulfovibrionaceae];g__DCE29;s__unidentified_DCE29	0.9999991927284658
ASV_17924	d__Bacteria;p__Firmicutes;c__Clostridia;o__Clostridiales;f__unidentified_Clostridiales;g__unidentified_Clostridiales;s__unidentified_Clostridiales	0.9919168114854017
ASV_8341	d__Bacteria;p__Proteobacteria;c__Alphaproteobacteria;o__Rhizobiales;f__unclassified_Rhizobiales;g__unclassified_Rhizobiales;s__unclassified_Rhizobiales	0.9999134454184518
ASV_10644	d__Bacteria;p__Firmicutes;c__Clostridia;o__Clostridiales;f__[Mogibacteriaceae];g__unidentified_[Mogibacteriaceae];s__unidentified_[Mogibacteriaceae]	0.9998166571018291
ASV_3027	d__Bacteria;p__Actinobacteria;c__Actinobacteria;o__Actinomycetales;f__Mycobacteriaceae;g__Mycobacterium;s__unidentified_Mycobacterium	0.8604336580355152
ASV_1527	d__Bacteria;p__Firmicutes;c__Clostridia;o__Clostridiales;f__Ruminococcaceae;g__Ruminococcus;s__unidentified_Ruminococcus	0.9999455094507814
ASV_19372	d__Bacteria;p__Firmicutes;c__Clostridia;o__Clostridiales;f__Ruminococcaceae;g__unidentified_Ruminococcaceae;s__unidentified_Ruminococcaceae	0.9577757427011606
ASV_14133	d__Bacteria;p__Firmicutes;c__Clostridia;o__Clostridiales;f__Lachnospiraceae;g__unclassified_Lachnospiraceae;s__unclassified_Lachnospiraceae	0.8444287022178625
ASV_25049	d__Bacteria;p__Firmicutes;c__Clostridia;o__Clostridiales;f__unidentified_Clostridiales;g__unidentified_Clostridiales;s__unidentified_Clostridiales	0.9999263715603067
ASV_12023	d__Bacteria;p__Firmicutes;c__Clostridia;o__Clostridiales;f__unclassified_Clostridiales;g__unclassified_Clostridiales;s__unclassified_Clostridiales	0.9996440811632294
ASV_4452	d__Bacteria;p__Firmicutes;c__Clostridia;o__Clostridiales;f__Lachnospiraceae;g__unclassified_Lachnospiraceae;s__unclassified_Lachnospiraceae	0.9650864828787855
ASV_6671	d__Bacteria;p__Firmicutes;c__Clostridia;o__Clostridiales;f__unidentified_Clostridiales;g__unidentified_Clostridiales;s__unidentified_Clostridiales	0.9999324406898021
ASV_13055	d__Bacteria;p__Firmicutes;c__Clostridia;o__Clostridiales;f__Lachnospiraceae;g__unidentified_Lachnospiraceae;s__unidentified_Lachnospiraceae	0.7341445774899374
ASV_17376	d__Bacteria;p__Firmicutes;c__Clostridia;o__Clostridiales;f__unidentified_Clostridiales;g__unidentified_Clostridiales;s__unidentified_Clostridiales	0.999964129239959
ASV_6027	d__Bacteria;p__Firmicutes;c__Clostridia;o__Clostridiales;f__Ruminococcaceae;g__unidentified_Ruminococcaceae;s__unidentified_Ruminococcaceae	0.9956069923923859
ASV_24639	d__Bacteria;p__Firmicutes;c__Clostridia;o__Clostridiales;f__Ruminococcaceae;g__unidentified_Ruminococcaceae;s__unidentified_Ruminococcaceae	0.9153914913689146
ASV_26350	d__Bacteria;p__Bacteroidetes;c__Bacteroidia;o__Bacteroidales;f__Prevotellaceae;g__Prevotella;s__unidentified_Prevotella	0.9979608136251932
ASV_8786	d__Bacteria;p__Firmicutes;c__Clostridia;o__Clostridiales;f__Ruminococcaceae;g__Oscillospira;s__unidentified_Oscillospira	0.9984086614195579
ASV_11628	d__Bacteria;p__Firmicutes;c__Clostridia;o__Clostridiales;f__Ruminococcaceae;g__unidentified_Ruminococcaceae;s__unidentified_Ruminococcaceae	0.7106246102805193
ASV_25546	d__Bacteria;p__Actinobacteria;c__Actinobacteria;o__Actinomycetales;f__Mycobacteriaceae;g__Mycobacterium;s__unidentified_Mycobacterium	0.9474607392023199
ASV_15516	d__Bacteria;p__Firmicutes;c__Clostridia;o__Clostridiales;f__unidentified_Clostridiales;g__unidentified_Clostridiales;s__unidentified_Clostridiales	0.9505789807760849
ASV_4526	d__Bacteria;p__Firmicutes;c__Clostridia;o__Clostridiales;f__Lachnospiraceae;g__unidentified_Lachnospiraceae;s__unidentified_Lachnospiraceae	0.7904700828203709
ASV_5122	d__Bacteria;p__Firmicutes;c__Clostridia;o__Clostridiales;f__Ruminococcaceae;g__Oscillospira;s__unidentified_Oscillospira	0.9720000289552528
ASV_11631	d__Bacteria;p__Firmicutes;c__Clostridia;o__Clostridiales;f__Lachnospiraceae;g__unidentified_Lachnospiraceae;s__unidentified_Lachnospiraceae	0.9618918499865706
ASV_22776	d__Bacteria;p__Bacteroidetes;c__Bacteroidia;o__Bacteroidales;f__Porphyromonadaceae;g__Parabacteroides;s__Parabacteroides_distasonis	0.9999964232178815
ASV_10423	d__Bacteria;p__Firmicutes;c__Clostridia;o__Clostridiales;f__Lachnospiraceae;g__unclassified_Lachnospiraceae;s__unclassified_Lachnospiraceae	0.9729522395707431
ASV_9554	d__Bacteria;p__Bacteroidetes;c__Bacteroidia;o__Bacteroidales;f__Rikenellaceae;g__Alistipes;s__Alistipes_massiliensis	0.7504124230747862
ASV_3797	d__Bacteria;p__Bacteroidetes;c__Bacteroidia;o__Bacteroidales;f__unidentified_Bacteroidales;g__unidentified_Bacteroidales;s__unidentified_Bacteroidales	0.9999885019533336
ASV_6260	d__Bacteria;p__Firmicutes;c__Clostridia;o__Clostridiales;f__Ruminococcaceae;g__unidentified_Ruminococcaceae;s__unidentified_Ruminococcaceae	0.9780718223335374
ASV_9079	d__Bacteria;p__Firmicutes;c__Clostridia;o__Clostridiales;f__unidentified_Clostridiales;g__unidentified_Clostridiales;s__unidentified_Clostridiales	0.8712117915141042
ASV_22354	d__Bacteria;p__TM7;c__TM7-3;o__CW040;f__F16;g__unidentified_F16;s__unidentified_F16	0.9999999987138324
ASV_22164	d__Bacteria;p__Firmicutes;c__Bacilli;o__Lactobacillales;f__Lactobacillaceae;g__unclassified_Lactobacillaceae;s__unclassified_Lactobacillaceae	0.9970429524558849
ASV_17869	d__Bacteria;p__Bacteroidetes;c__Bacteroidia;o__Bacteroidales;f__S24-7;g__unidentified_S24-7;s__unidentified_S24-7	0.9999982004938763
ASV_21500	d__Bacteria;p__Proteobacteria;c__Gammaproteobacteria;o__Pseudomonadales;f__Moraxellaceae;g__Psychrobacter;s__unidentified_Psychrobacter	0.9983183706173077
ASV_20407	d__Bacteria;p__Firmicutes;c__Bacilli;o__Lactobacillales;f__Lactobacillaceae;g__Lactobacillus;s__Lactobacillus_delbrueckii	0.9994470675075001
ASV_25329	d__Bacteria;p__Firmicutes;c__Clostridia;o__Clostridiales;f__Ruminococcaceae;g__Oscillospira;s__unclassified_Oscillospira	0.9993151751447122
ASV_4183	d__Bacteria;p__Actinobacteria;c__Actinobacteria;o__Actinomycetales;f__Streptomycetaceae;g__unclassified_Streptomycetaceae;s__unclassified_Streptomycetaceae	0.9999728851005386
ASV_21851	d__Bacteria;p__Firmicutes;c__Clostridia;o__Clostridiales;f__unclassified_Clostridiales;g__unclassified_Clostridiales;s__unclassified_Clostridiales	0.9999979468122762
ASV_396	d__Bacteria;p__Firmicutes;c__Clostridia;o__Clostridiales;f__Ruminococcaceae;g__Oscillospira;s__unidentified_Oscillospira	0.9997607251268251
ASV_5612	d__Bacteria;p__Firmicutes;c__Clostridia;o__Clostridiales;f__unidentified_Clostridiales;g__unidentified_Clostridiales;s__unidentified_Clostridiales	0.9892764647626495
ASV_22935	d__Bacteria;p__Proteobacteria;c__Epsilonproteobacteria;o__Campylobacterales;f__Campylobacteraceae;g__Arcobacter;s__unidentified_Arcobacter	0.9999077173659362
ASV_17191	d__Bacteria;p__Actinobacteria;c__Actinobacteria;o__Actinomycetales;f__unclassified_Actinomycetales;g__unclassified_Actinomycetales;s__unclassified_Actinomycetales	0.9633865789163787
ASV_5056	d__Bacteria;p__Firmicutes;c__Clostridia;o__Clostridiales;f__Ruminococcaceae;g__unidentified_Ruminococcaceae;s__unidentified_Ruminococcaceae	0.9982240382300438
ASV_3292	d__Bacteria;p__Firmicutes;c__Clostridia;o__Clostridiales;f__Christensenellaceae;g__unidentified_Christensenellaceae;s__unidentified_Christensenellaceae	0.9999998959061199
ASV_8637	d__Bacteria;p__Firmicutes;c__Clostridia;o__Clostridiales;f__Ruminococcaceae;g__unidentified_Ruminococcaceae;s__unidentified_Ruminococcaceae	0.9923780493543986
ASV_4455	d__Bacteria;p__Bacteroidetes;c__Bacteroidia;o__Bacteroidales;f__S24-7;g__unidentified_S24-7;s__unidentified_S24-7	0.9999999138320029
ASV_14605	d__Bacteria;p__Bacteroidetes;c__Bacteroidia;o__Bacteroidales;f__S24-7;g__unidentified_S24-7;s__unidentified_S24-7	0.999999032553787
ASV_4607	d__Bacteria;p__Firmicutes;c__Clostridia;o__Clostridiales;f__Christensenellaceae;g__Christensenella;s__unidentified_Christensenella	0.9999836695652559
ASV_20128	d__Bacteria;p__Proteobacteria;c__Betaproteobacteria;o__Burkholderiales;f__Comamonadaceae;g__unclassified_Comamonadaceae;s__unclassified_Comamonadaceae	0.9999984353803489
ASV_15041	d__Bacteria;p__Bacteroidetes;c__Bacteroidia;o__Bacteroidales;f__Porphyromonadaceae;g__Parabacteroides;s__Parabacteroides_distasonis	0.9999973899755856
ASV_10306	d__Bacteria;p__Bacteroidetes;c__Bacteroidia;o__Bacteroidales;f__Bacteroidaceae;g__Bacteroides;s__Bacteroides_acidifaciens	0.9938042341765825
ASV_12696	d__Bacteria;p__Firmicutes;c__Clostridia;o__Clostridiales;f__Ruminococcaceae;g__unidentified_Ruminococcaceae;s__unidentified_Ruminococcaceae	0.995199117457457
ASV_14581	d__Bacteria;p__Proteobacteria;c__Betaproteobacteria;o__Burkholderiales;f__Burkholderiaceae;g__Burkholderia;s__unidentified_Burkholderia	0.8270361485755898
ASV_8490	d__Bacteria;p__Proteobacteria;c__Betaproteobacteria;o__Burkholderiales;f__Comamonadaceae;g__Tepidimonas;s__unidentified_Tepidimonas	0.9992318652107203
ASV_1808	d__Bacteria;p__Firmicutes;c__Bacilli;o__Lactobacillales;f__Lactobacillaceae;g__Lactobacillus;s__unclassified_Lactobacillus	0.9999992122408125
ASV_23487	d__Bacteria;p__Firmicutes;c__Clostridia;o__Clostridiales;f__Ruminococcaceae;g__unidentified_Ruminococcaceae;s__unidentified_Ruminococcaceae	0.9722794501395419
ASV_14174	d__Bacteria;p__Proteobacteria;c__Alphaproteobacteria;o__Rhodospirillales;f__Rhodospirillaceae;g__Reyranella;s__Reyranella_massiliensis	0.9874236204633671
ASV_449	d__Bacteria;p__Firmicutes;c__Clostridia;o__Clostridiales;f__Lachnospiraceae;g__unidentified_Lachnospiraceae;s__unidentified_Lachnospiraceae	0.7333724040647984
ASV_4716	d__Bacteria;p__Bacteroidetes;c__Bacteroidia;o__Bacteroidales;f__S24-7;g__unidentified_S24-7;s__unidentified_S24-7	0.9999997085491968
ASV_19285	d__Bacteria;p__Bacteroidetes;c__Bacteroidia;o__Bacteroidales;f__Porphyromonadaceae;g__Parabacteroides;s__Parabacteroides_distasonis	0.99999774058403
ASV_19583	d__Bacteria;p__Firmicutes;c__Clostridia;o__Clostridiales;f__Lachnospiraceae;g__Blautia;s__unidentified_Blautia	0.8596147722283553
ASV_6139	d__Bacteria;p__Chloroflexi;c__Thermomicrobia;o__unidentified_Thermomicrobia;f__unidentified_Thermomicrobia;g__unidentified_Thermomicrobia;s__unidentified_Thermomicrobia	0.9999711410452717
ASV_8681	d__Bacteria;p__Actinobacteria;c__Actinobacteria;o__Actinomycetales;f__Microbacteriaceae;g__Salinibacterium;s__unidentified_Salinibacterium	0.7501989119871251
ASV_15157	d__Bacteria;p__Bacteroidetes;c__Bacteroidia;o__Bacteroidales;f__unidentified_Bacteroidales;g__unidentified_Bacteroidales;s__unidentified_Bacteroidales	0.999785638807713
ASV_25712	d__Bacteria;p__Firmicutes;c__Clostridia;o__Clostridiales;f__unidentified_Clostridiales;g__unidentified_Clostridiales;s__unidentified_Clostridiales	0.9387505396478685
ASV_972	d__Bacteria;p__Firmicutes;c__Clostridia;o__Clostridiales;f__unidentified_Clostridiales;g__unidentified_Clostridiales;s__unidentified_Clostridiales	0.9861986041263617
ASV_22232	d__Bacteria;p__Firmicutes;c__Clostridia;o__Clostridiales;f__unclassified_Clostridiales;g__unclassified_Clostridiales;s__unclassified_Clostridiales	0.9999999807574296
ASV_7748	d__Bacteria;p__Bacteroidetes;c__Bacteroidia;o__Bacteroidales;f__unidentified_Bacteroidales;g__unidentified_Bacteroidales;s__unidentified_Bacteroidales	0.9841801894060578
ASV_10219	d__Bacteria;p__Bacteroidetes;c__Bacteroidia;o__Bacteroidales;f__S24-7;g__unidentified_S24-7;s__unidentified_S24-7	0.9999979496163564
ASV_1456	d__Bacteria;p__Proteobacteria;c__Gammaproteobacteria;o__Enterobacteriales;f__Enterobacteriaceae;g__Shigella;s__unclassified_Shigella	0.8280394569943187
ASV_22165	d__Bacteria;p__Firmicutes;c__Clostridia;o__Clostridiales;f__unidentified_Clostridiales;g__unidentified_Clostridiales;s__unidentified_Clostridiales	0.9996985131976077
ASV_20620	d__Bacteria;p__Firmicutes;c__Clostridia;o__Clostridiales;f__Veillonellaceae;g__Phascolarctobacterium;s__unidentified_Phascolarctobacterium	0.9999999980954613
ASV_18259	d__Bacteria;p__Firmicutes;c__Clostridia;o__Clostridiales;f__Christensenellaceae;g__unidentified_Christensenellaceae;s__unidentified_Christensenellaceae	0.9999993372504072
ASV_3255	d__Bacteria;p__Firmicutes;c__Clostridia;o__Clostridiales;f__Ruminococcaceae;g__Ruminococcus;s__unidentified_Ruminococcus	0.9052160262246064
ASV_10506	d__Bacteria;p__Firmicutes;c__Clostridia;o__Clostridiales;f__Ruminococcaceae;g__Oscillospira;s__unidentified_Oscillospira	0.9951839164371729
ASV_9534	d__Bacteria;p__Tenericutes;c__Mollicutes;o__RF39;f__unidentified_RF39;g__unidentified_RF39;s__unidentified_RF39	0.9999999998957776
ASV_19288	d__Bacteria;p__Firmicutes;c__Bacilli;o__Bacillales;f__Paenibacillaceae;g__Cohnella;s__unidentified_Cohnella	0.9960772013034126
ASV_12662	d__Bacteria;p__Bacteroidetes;c__Bacteroidia;o__Bacteroidales;f__S24-7;g__unidentified_S24-7;s__unidentified_S24-7	0.999998376250357
ASV_23863	d__Bacteria;p__Firmicutes;c__Clostridia;o__Clostridiales;f__Clostridiaceae;g__Clostridium;s__Clostridium_baratii	0.9098666714116354
ASV_7760	d__Bacteria;p__Firmicutes;c__Clostridia;o__Clostridiales;f__Ruminococcaceae;g__Oscillospira;s__unidentified_Oscillospira	0.9988589864664764
ASV_12782	d__Bacteria;p__Bacteroidetes;c__Bacteroidia;o__Bacteroidales;f__[Odoribacteraceae];g__Butyricimonas;s__unidentified_Butyricimonas	1.0
ASV_10811	d__Bacteria;p__Firmicutes;c__Clostridia;o__Clostridiales;f__unidentified_Clostridiales;g__unidentified_Clostridiales;s__unidentified_Clostridiales	0.9293369637035295
ASV_13002	d__Bacteria;p__Firmicutes;c__Clostridia;o__Clostridiales;f__Ruminococcaceae;g__Ruminococcus;s__Ruminococcus_callidus	0.8461180925831057
ASV_2583	d__Bacteria;p__Firmicutes;c__Bacilli;o__Lactobacillales;f__Leuconostocaceae;g__Leuconostoc;s__Leuconostoc_mesenteroides	0.9305918284707227
ASV_2660	d__Bacteria;p__Bacteroidetes;c__Bacteroidia;o__Bacteroidales;f__BS11;g__unidentified_BS11;s__unidentified_BS11	0.9999611593380907
ASV_11114	d__Bacteria;p__Tenericutes;c__Mollicutes;o__Anaeroplasmatales;f__Anaeroplasmataceae;g__Anaeroplasma;s__unidentified_Anaeroplasma	0.9999999968966335
ASV_25131	d__Bacteria;p__Firmicutes;c__Clostridia;o__Clostridiales;f__Clostridiaceae;g__unidentified_Clostridiaceae;s__unidentified_Clostridiaceae	0.8181265196961645
ASV_10831	d__Bacteria;p__Actinobacteria;c__Thermoleophilia;o__Gaiellales;f__Gaiellaceae;g__unidentified_Gaiellaceae;s__unidentified_Gaiellaceae	0.9999019084034843
ASV_7409	d__Bacteria;p__Firmicutes;c__Clostridia;o__Clostridiales;f__unidentified_Clostridiales;g__unidentified_Clostridiales;s__unidentified_Clostridiales	0.9999214394743311
ASV_3167	d__Bacteria;p__Bacteroidetes;c__Flavobacteriia;o__Flavobacteriales;f__Flavobacteriaceae;g__Flavobacterium;s__Flavobacterium_frigidarium	0.9886748994638868
ASV_9738	d__Bacteria;p__Firmicutes;c__Clostridia;o__Clostridiales;f__Ruminococcaceae;g__unidentified_Ruminococcaceae;s__unidentified_Ruminococcaceae	0.9989935255539205
ASV_25181	d__Bacteria;p__Firmicutes;c__Clostridia;o__Clostridiales;f__Ruminococcaceae;g__Oscillospira;s__unidentified_Oscillospira	0.9994615840747701
ASV_9169	d__Bacteria;p__Firmicutes;c__Clostridia;o__Clostridiales;f__unidentified_Clostridiales;g__unidentified_Clostridiales;s__unidentified_Clostridiales	0.9999274890400716
ASV_13639	d__Bacteria;p__Acidobacteria;c__Solibacteres;o__Solibacterales;f__Solibacteraceae;g__unidentified_Solibacteraceae;s__unidentified_Solibacteraceae	0.9378625488077691
ASV_25340	d__Bacteria;p__Firmicutes;c__Clostridia;o__Clostridiales;f__Ruminococcaceae;g__Oscillospira;s__unidentified_Oscillospira	0.9953607406519913
ASV_1347	d__Bacteria;p__Firmicutes;c__Clostridia;o__Clostridiales;f__Ruminococcaceae;g__Oscillospira;s__unidentified_Oscillospira	0.9974563991147425
ASV_26312	d__Bacteria;p__Firmicutes;c__Clostridia;o__Clostridiales;f__Clostridiaceae;g__unidentified_Clostridiaceae;s__unidentified_Clostridiaceae	0.9627903285865627
ASV_18968	d__Bacteria;p__Proteobacteria;c__Alphaproteobacteria;o__Sphingomonadales;f__Sphingomonadaceae;g__Sphingobium;s__unidentified_Sphingobium	0.9998296060195875
ASV_14079	d__Bacteria;p__Tenericutes;c__Mollicutes;o__RF39;f__unidentified_RF39;g__unidentified_RF39;s__unidentified_RF39	0.9999999365202845
ASV_24083	d__Bacteria;p__Proteobacteria;c__Gammaproteobacteria;o__Pseudomonadales;f__Pseudomonadaceae;g__Pseudomonas;s__unidentified_Pseudomonas	0.7271495259171267
ASV_6714	d__Bacteria;p__Acidobacteria;c__Acidobacteriia;o__Acidobacteriales;f__Koribacteraceae;g__unidentified_Koribacteraceae;s__unidentified_Koribacteraceae	0.9999917846291835
ASV_7609	d__Bacteria;p__Tenericutes;c__Mollicutes;o__RF39;f__unidentified_RF39;g__unidentified_RF39;s__unidentified_RF39	0.9999999996664144
ASV_19079	d__Bacteria;p__Actinobacteria;c__Actinobacteria;o__Actinomycetales;f__Corynebacteriaceae;g__Corynebacterium;s__unidentified_Corynebacterium	0.9993508333039448
ASV_189	d__Bacteria;p__Firmicutes;c__Clostridia;o__Clostridiales;f__Ruminococcaceae;g__unidentified_Ruminococcaceae;s__unidentified_Ruminococcaceae	0.9919693156454243
ASV_14445	d__Bacteria;p__Firmicutes;c__Clostridia;o__Clostridiales;f__unidentified_Clostridiales;g__unidentified_Clostridiales;s__unidentified_Clostridiales	0.9999761638253912
ASV_9156	d__Bacteria;p__Firmicutes;c__Clostridia;o__Clostridiales;f__unidentified_Clostridiales;g__unidentified_Clostridiales;s__unidentified_Clostridiales	0.7447694431749098
ASV_4016	d__Bacteria;p__TM7;c__TM7-1;o__unidentified_TM7-1;f__unidentified_TM7-1;g__unidentified_TM7-1;s__unidentified_TM7-1	0.9997590599826445
ASV_20342	d__Bacteria;p__Gemmatimonadetes;c__Gemmatimonadetes;o__unidentified_Gemmatimonadetes;f__unidentified_Gemmatimonadetes;g__unidentified_Gemmatimonadetes;s__unidentified_Gemmatimonadetes	0.9893802868214393
ASV_11098	d__Bacteria;p__Actinobacteria;c__Actinobacteria;o__Actinomycetales;f__Nocardioidaceae;g__Nocardioides;s__unidentified_Nocardioides	0.8244375853980904
ASV_15077	d__Bacteria;p__TM7;c__TM7-3;o__CW040;f__F16;g__unidentified_F16;s__unidentified_F16	0.999999995635136
ASV_15462	d__Bacteria;p__Firmicutes;c__Clostridia;o__Clostridiales;f__unclassified_Clostridiales;g__unclassified_Clostridiales;s__unclassified_Clostridiales	0.9999999982669356
ASV_2692	d__Bacteria;p__Proteobacteria;c__Deltaproteobacteria;o__Desulfovibrionales;f__Desulfovibrionaceae;g__unidentified_Desulfovibrionaceae;s__unidentified_Desulfovibrionaceae	0.9991844546352432
ASV_11883	d__Bacteria;p__Proteobacteria;c__Gammaproteobacteria;o__Pseudomonadales;f__Moraxellaceae;g__Acinetobacter;s__unclassified_Acinetobacter	0.9999980434416254
ASV_17325	d__Bacteria;p__Proteobacteria;c__Betaproteobacteria;o__Burkholderiales;f__Comamonadaceae;g__Acidovorax;s__unclassified_Acidovorax	0.7193529873961694
ASV_1281	d__Bacteria;p__Firmicutes;c__Bacilli;o__Lactobacillales;f__Carnobacteriaceae;g__unclassified_Carnobacteriaceae;s__unclassified_Carnobacteriaceae	0.9900134214491194
ASV_1677	d__Bacteria;p__Proteobacteria;c__Gammaproteobacteria;o__Enterobacteriales;f__Enterobacteriaceae;g__unclassified_Enterobacteriaceae;s__unclassified_Enterobacteriaceae	0.9999782593475312
ASV_8408	d__Bacteria;p__Bacteroidetes;c__Bacteroidia;o__Bacteroidales;f__unidentified_Bacteroidales;g__unidentified_Bacteroidales;s__unidentified_Bacteroidales	0.9934123631202464
ASV_25505	d__Bacteria;p__Firmicutes;c__Clostridia;o__Clostridiales;f__unidentified_Clostridiales;g__unidentified_Clostridiales;s__unidentified_Clostridiales	0.7722350588244787
ASV_22628	d__Bacteria;p__Firmicutes;c__Clostridia;o__Clostridiales;f__[Acidaminobacteraceae];g__Fusibacter;s__unidentified_Fusibacter	0.9908528231828867
ASV_2307	d__Bacteria;p__Bacteroidetes;c__Bacteroidia;o__Bacteroidales;f__S24-7;g__unidentified_S24-7;s__unidentified_S24-7	0.9999438754597301
ASV_427	d__Bacteria;p__Firmicutes;c__Clostridia;o__Clostridiales;f__Ruminococcaceae;g__Oscillospira;s__unidentified_Oscillospira	0.9252843668625294
ASV_7538	d__Bacteria;p__Firmicutes;c__Clostridia;o__Clostridiales;f__[Mogibacteriaceae];g__unidentified_[Mogibacteriaceae];s__unidentified_[Mogibacteriaceae]	0.9999885663684099
ASV_1542	d__Bacteria;p__Tenericutes;c__Mollicutes;o__RF39;f__unidentified_RF39;g__unidentified_RF39;s__unidentified_RF39	0.9999999997434657
ASV_8586	d__Bacteria;p__Firmicutes;c__Clostridia;o__Clostridiales;f__[Mogibacteriaceae];g__unidentified_[Mogibacteriaceae];s__unidentified_[Mogibacteriaceae]	0.9957540687568635
ASV_18997	d__Bacteria;p__Proteobacteria;c__Gammaproteobacteria;o__Xanthomonadales;f__Xanthomonadaceae;g__Rhodanobacter;s__unclassified_Rhodanobacter	0.9948373081657718
ASV_8497	d__Bacteria;p__Bacteroidetes;c__Bacteroidia;o__Bacteroidales;f__S24-7;g__unidentified_S24-7;s__unidentified_S24-7	0.9999965580544317
ASV_21940	d__Bacteria;p__Firmicutes;c__Clostridia;o__Clostridiales;f__Lachnospiraceae;g__[Ruminococcus];s__[Ruminococcus]_gnavus	0.9739025627391549
ASV_11072	d__Bacteria;p__Bacteroidetes;c__Bacteroidia;o__Bacteroidales;f__Porphyromonadaceae;g__Parabacteroides;s__Parabacteroides_distasonis	0.9999970580159716
ASV_5485	d__Bacteria;p__Bacteroidetes;c__Bacteroidia;o__Bacteroidales;f__unidentified_Bacteroidales;g__unidentified_Bacteroidales;s__unidentified_Bacteroidales	0.9998750844662938
ASV_6346	d__Bacteria;p__Firmicutes;c__Clostridia;o__Clostridiales;f__Ruminococcaceae;g__Oscillospira;s__unidentified_Oscillospira	0.9982050667548559
ASV_21243	d__Bacteria;p__Firmicutes;c__Clostridia;o__Clostridiales;f__Lachnospiraceae;g__Coprococcus;s__unidentified_Coprococcus	0.9562377880458407
ASV_17375	d__Bacteria;p__Firmicutes;c__Clostridia;o__Clostridiales;f__Ruminococcaceae;g__unidentified_Ruminococcaceae;s__unidentified_Ruminococcaceae	0.8798988667232404
ASV_8199	d__Bacteria;p__Proteobacteria;c__Alphaproteobacteria;o__Ellin329;f__unidentified_Ellin329;g__unidentified_Ellin329;s__unidentified_Ellin329	0.9999994178685074
ASV_17799	d__Bacteria;p__Firmicutes;c__Clostridia;o__Clostridiales;f__unidentified_Clostridiales;g__unidentified_Clostridiales;s__unidentified_Clostridiales	0.9998049896708419
ASV_8379	d__Bacteria;p__Actinobacteria;c__Actinobacteria;o__Actinomycetales;f__Frankiaceae;g__unidentified_Frankiaceae;s__unidentified_Frankiaceae	0.737241953032896
ASV_23127	d__Bacteria;p__Firmicutes;c__Bacilli;o__Lactobacillales;f__Lactobacillaceae;g__Lactobacillus;s__unclassified_Lactobacillus	0.8790362812744986
ASV_732	d__Bacteria;p__Firmicutes;c__Clostridia;o__Clostridiales;f__Ruminococcaceae;g__Oscillospira;s__unidentified_Oscillospira	0.9994263702069629
ASV_20862	d__Bacteria;p__Firmicutes;c__Clostridia;o__Clostridiales;f__unidentified_Clostridiales;g__unidentified_Clostridiales;s__unidentified_Clostridiales	0.7518744030513176
ASV_15899	d__Bacteria;p__Actinobacteria;c__Actinobacteria;o__Actinomycetales;f__Micrococcaceae;g__Arthrobacter;s__unclassified_Arthrobacter	0.9248016680488924
ASV_5940	d__Bacteria;p__Firmicutes;c__Clostridia;o__Clostridiales;f__unidentified_Clostridiales;g__unidentified_Clostridiales;s__unidentified_Clostridiales	0.8317335384239465
ASV_15187	d__Bacteria;p__Bacteroidetes;c__Bacteroidia;o__Bacteroidales;f__[Paraprevotellaceae];g__YRC22;s__unidentified_YRC22	0.9999999376680383
ASV_19576	d__Bacteria;p__Firmicutes;c__Clostridia;o__Clostridiales;f__Ruminococcaceae;g__Ruminococcus;s__Ruminococcus_callidus	0.7655192904660092
ASV_7147	d__Bacteria;p__Firmicutes;c__Clostridia;o__Clostridiales;f__Ruminococcaceae;g__unidentified_Ruminococcaceae;s__unidentified_Ruminococcaceae	0.9859916571456943
ASV_15865	d__Bacteria;p__Firmicutes;c__Clostridia;o__Clostridiales;f__unclassified_Clostridiales;g__unclassified_Clostridiales;s__unclassified_Clostridiales	0.9999999995286337
ASV_15505	d__Bacteria;p__TM7;c__TM7-1;o__unidentified_TM7-1;f__unidentified_TM7-1;g__unidentified_TM7-1;s__unidentified_TM7-1	0.9999991495654604
ASV_18963	d__Bacteria;p__Firmicutes;c__Clostridia;o__Clostridiales;f__Ruminococcaceae;g__Oscillospira;s__unidentified_Oscillospira	0.9964806393344257
ASV_5314	d__Bacteria;p__Firmicutes;c__Clostridia;o__Clostridiales;f__unidentified_Clostridiales;g__unidentified_Clostridiales;s__unidentified_Clostridiales	0.9997964758833172
ASV_22920	d__Bacteria;p__Firmicutes;c__Clostridia;o__Clostridiales;f__Clostridiaceae;g__unclassified_Clostridiaceae;s__unclassified_Clostridiaceae	0.9999993552111553
ASV_18502	d__Bacteria;p__Firmicutes;c__Clostridia;o__Clostridiales;f__Ruminococcaceae;g__Oscillospira;s__unidentified_Oscillospira	0.9942695720362247
ASV_6684	d__Bacteria;p__Proteobacteria;c__Gammaproteobacteria;o__Pseudomonadales;f__Moraxellaceae;g__Psychrobacter;s__Psychrobacter_sanguinis	0.9651786227443219
ASV_388	d__Bacteria;p__Bacteroidetes;c__Bacteroidia;o__Bacteroidales;f__Rikenellaceae;g__unclassified_Rikenellaceae;s__unclassified_Rikenellaceae	0.9999999986934986
ASV_4999	d__Bacteria;p__Actinobacteria;c__Actinobacteria;o__Actinomycetales;f__Microbacteriaceae;g__Cryocola;s__unidentified_Cryocola	0.9786719847604494
ASV_1753	d__Bacteria;p__Actinobacteria;c__Actinobacteria;o__Actinomycetales;f__Mycobacteriaceae;g__Mycobacterium;s__unidentified_Mycobacterium	0.9438201691359935
ASV_103	d__Bacteria;p__Firmicutes;c__Clostridia;o__Clostridiales;f__unidentified_Clostridiales;g__unidentified_Clostridiales;s__unidentified_Clostridiales	0.8108139278184595
ASV_10722	d__Bacteria;p__Firmicutes;c__Clostridia;o__Clostridiales;f__Ruminococcaceae;g__Oscillospira;s__unidentified_Oscillospira	0.9971639604181733
ASV_15780	d__Bacteria;p__Firmicutes;c__Clostridia;o__Clostridiales;f__unidentified_Clostridiales;g__unidentified_Clostridiales;s__unidentified_Clostridiales	0.9999646082132504
ASV_12621	d__Bacteria;p__Actinobacteria;c__Coriobacteriia;o__Coriobacteriales;f__Coriobacteriaceae;g__unidentified_Coriobacteriaceae;s__unidentified_Coriobacteriaceae	0.999974605161451
ASV_1695	d__Bacteria;p__Firmicutes;c__Clostridia;o__Clostridiales;f__Ruminococcaceae;g__Oscillospira;s__unidentified_Oscillospira	0.9996465489142513
ASV_13656	d__Bacteria;p__Proteobacteria;c__Gammaproteobacteria;o__Xanthomonadales;f__Xanthomonadaceae;g__Rhodanobacter;s__unclassified_Rhodanobacter	0.9982628791915986
ASV_5608	d__Bacteria;p__TM7;c__TM7-1;o__unidentified_TM7-1;f__unidentified_TM7-1;g__unidentified_TM7-1;s__unidentified_TM7-1	0.999999792827957
ASV_12615	d__Bacteria;p__Firmicutes;c__Clostridia;o__Clostridiales;f__unclassified_Clostridiales;g__unclassified_Clostridiales;s__unclassified_Clostridiales	0.9999999928983103
ASV_20993	d__Bacteria;p__Firmicutes;c__Erysipelotrichi;o__Erysipelotrichales;f__Erysipelotrichaceae;g__[Eubacterium];s__[Eubacterium]_dolichum	0.9999934980374042
ASV_7638	d__Bacteria;p__Bacteroidetes;c__Bacteroidia;o__Bacteroidales;f__[Odoribacteraceae];g__Butyricimonas;s__unidentified_Butyricimonas	1.0
ASV_6110	d__Bacteria;p__Firmicutes;c__Clostridia;o__Clostridiales;f__Lachnospiraceae;g__[Ruminococcus];s__[Ruminococcus]_gnavus	0.9975186613787882
ASV_15945	d__Bacteria;p__Firmicutes;c__Clostridia;o__Clostridiales;f__Lachnospiraceae;g__unidentified_Lachnospiraceae;s__unidentified_Lachnospiraceae	0.8871753263144903
ASV_11910	d__Bacteria;p__TM7;c__TM7-1;o__unidentified_TM7-1;f__unidentified_TM7-1;g__unidentified_TM7-1;s__unidentified_TM7-1	0.9999964370965506
ASV_8964	d__Bacteria;p__Actinobacteria;c__Actinobacteria;o__Actinomycetales;f__unidentified_Actinomycetales;g__unidentified_Actinomycetales;s__unidentified_Actinomycetales	0.8052981542010026
ASV_12450	d__Bacteria;p__Bacteroidetes;c__Bacteroidia;o__Bacteroidales;f__Porphyromonadaceae;g__Parabacteroides;s__Parabacteroides_distasonis	0.9999933516435416
ASV_5733	d__Bacteria;p__Firmicutes;c__Clostridia;o__Clostridiales;f__unidentified_Clostridiales;g__unidentified_Clostridiales;s__unidentified_Clostridiales	0.9985297601615051
ASV_12055	d__Bacteria;p__Firmicutes;c__Clostridia;o__Clostridiales;f__Ruminococcaceae;g__Oscillospira;s__unidentified_Oscillospira	0.999456030041635
ASV_17106	d__Bacteria;p__Gemmatimonadetes;c__Gemmatimonadetes;o__unidentified_Gemmatimonadetes;f__unidentified_Gemmatimonadetes;g__unidentified_Gemmatimonadetes;s__unidentified_Gemmatimonadetes	0.9935234928659878
ASV_1516	d__Bacteria;p__Chloroflexi;c__Ellin6529;o__unidentified_Ellin6529;f__unidentified_Ellin6529;g__unidentified_Ellin6529;s__unidentified_Ellin6529	0.9999999996948361
ASV_21197	d__Bacteria;p__Acidobacteria;c__Solibacteres;o__Solibacterales;f__Solibacteraceae;g__unidentified_Solibacteraceae;s__unidentified_Solibacteraceae	0.9416247487793935
ASV_22268	d__Bacteria;p__Proteobacteria;c__Alphaproteobacteria;o__Rhizobiales;f__Hyphomicrobiaceae;g__Rhodoplanes;s__unidentified_Rhodoplanes	0.9996915991964521
ASV_1796	d__Bacteria;p__Proteobacteria;c__Alphaproteobacteria;o__Rhizobiales;f__Beijerinckiaceae;g__unidentified_Beijerinckiaceae;s__unidentified_Beijerinckiaceae	0.911485798379476
ASV_8532	d__Bacteria;p__Actinobacteria;c__Actinobacteria;o__Actinomycetales;f__Nocardioidaceae;g__unidentified_Nocardioidaceae;s__unidentified_Nocardioidaceae	0.9608065874604974
ASV_18242	d__Bacteria;p__Firmicutes;c__Clostridia;o__Clostridiales;f__Lachnospiraceae;g__unidentified_Lachnospiraceae;s__unidentified_Lachnospiraceae	0.9671658031328006
ASV_13747	d__Bacteria;p__Firmicutes;c__Clostridia;o__Clostridiales;f__Ruminococcaceae;g__Oscillospira;s__unidentified_Oscillospira	0.9998898462916497
ASV_16346	d__Bacteria;p__Firmicutes;c__Clostridia;o__Clostridiales;f__unidentified_Clostridiales;g__unidentified_Clostridiales;s__unidentified_Clostridiales	0.8453982245998167
ASV_23414	d__Bacteria;p__Bacteroidetes;c__Bacteroidia;o__Bacteroidales;f__Rikenellaceae;g__unidentified_Rikenellaceae;s__unidentified_Rikenellaceae	0.9139658337702602
ASV_18267	d__Bacteria;p__Bacteroidetes;c__Bacteroidia;o__Bacteroidales;f__S24-7;g__unidentified_S24-7;s__unidentified_S24-7	0.9999981617742562
ASV_8402	d__Bacteria;p__Firmicutes;c__Clostridia;o__Clostridiales;f__Ruminococcaceae;g__Ruminococcus;s__unidentified_Ruminococcus	0.9096861333585706
ASV_20608	d__Bacteria;p__Bacteroidetes;c__Bacteroidia;o__Bacteroidales;f__S24-7;g__unidentified_S24-7;s__unidentified_S24-7	0.9999931991995838
ASV_21085	d__Bacteria;p__Actinobacteria;c__Actinobacteria;o__Actinomycetales;f__Micromonosporaceae;g__unclassified_Micromonosporaceae;s__unclassified_Micromonosporaceae	0.9995658068085065
ASV_14295	d__Bacteria;p__Bacteroidetes;c__Bacteroidia;o__Bacteroidales;f__unidentified_Bacteroidales;g__unidentified_Bacteroidales;s__unidentified_Bacteroidales	0.999988729952249
ASV_13134	d__Bacteria;p__Firmicutes;c__Bacilli;o__Lactobacillales;f__Enterococcaceae;g__Enterococcus;s__unclassified_Enterococcus	0.7456314675223561
ASV_17887	d__Bacteria;p__Firmicutes;c__Clostridia;o__Clostridiales;f__Lachnospiraceae;g__Blautia;s__unidentified_Blautia	0.9800542758005818
ASV_12255	d__Bacteria;p__Bacteroidetes;c__Bacteroidia;o__Bacteroidales;f__Rikenellaceae;g__unclassified_Rikenellaceae;s__unclassified_Rikenellaceae	0.9999999986179157
ASV_1335	d__Bacteria;p__Bacteroidetes;c__Bacteroidia;o__Bacteroidales;f__Bacteroidaceae;g__Bacteroides;s__unclassified_Bacteroides	0.999999998287344
ASV_11627	d__Bacteria;p__Firmicutes;c__Bacilli;o__Bacillales;f__Bacillaceae;g__Bacillus;s__Bacillus_flexus	0.9955627126109484
ASV_24845	d__Bacteria;p__Actinobacteria;c__Actinobacteria;o__Actinomycetales;f__Streptosporangiaceae;g__unclassified_Streptosporangiaceae;s__unclassified_Streptosporangiaceae	0.9999995471541681
ASV_15198	d__Bacteria;p__Firmicutes;c__Clostridia;o__Clostridiales;f__Ruminococcaceae;g__Ruminococcus;s__unidentified_Ruminococcus	0.9799483700075138
ASV_22922	d__Bacteria;p__Firmicutes;c__Clostridia;o__Clostridiales;f__unidentified_Clostridiales;g__unidentified_Clostridiales;s__unidentified_Clostridiales	0.9999872339334691
ASV_15361	d__Bacteria;p__Firmicutes;c__Clostridia;o__Clostridiales;f__unclassified_Clostridiales;g__unclassified_Clostridiales;s__unclassified_Clostridiales	0.9999999998581746
ASV_4346	d__Bacteria;p__Firmicutes;c__Clostridia;o__Clostridiales;f__Clostridiaceae;g__Proteiniclasticum;s__unidentified_Proteiniclasticum	0.999996492499333
ASV_19961	d__Bacteria;p__Firmicutes;c__Clostridia;o__Clostridiales;f__Ruminococcaceae;g__unidentified_Ruminococcaceae;s__unidentified_Ruminococcaceae	0.9968946195146787
ASV_557	d__Bacteria;p__Firmicutes;c__Clostridia;o__Clostridiales;f__unclassified_Clostridiales;g__unclassified_Clostridiales;s__unclassified_Clostridiales	0.9999555046749471
ASV_15970	d__Bacteria;p__Proteobacteria;c__Deltaproteobacteria;o__Desulfovibrionales;f__Desulfovibrionaceae;g__Desulfovibrio;s__unidentified_Desulfovibrio	0.8864219872681363
ASV_22647	d__Bacteria;p__Proteobacteria;c__Alphaproteobacteria;o__Sphingomonadales;f__Sphingomonadaceae;g__Kaistobacter;s__unidentified_Kaistobacter	0.9943493807727526
ASV_5800	d__Bacteria;p__Tenericutes;c__Mollicutes;o__RF39;f__unidentified_RF39;g__unidentified_RF39;s__unidentified_RF39	0.9999999962658137
ASV_18675	d__Bacteria;p__Firmicutes;c__Clostridia;o__Clostridiales;f__Lachnospiraceae;g__[Ruminococcus];s__[Ruminococcus]_gnavus	0.9914998524127941
ASV_230	d__Bacteria;p__Bacteroidetes;c__Bacteroidia;o__Bacteroidales;f__S24-7;g__unidentified_S24-7;s__unidentified_S24-7	0.999957625037157
ASV_1478	d__Bacteria;p__Firmicutes;c__Clostridia;o__Clostridiales;f__Ruminococcaceae;g__unidentified_Ruminococcaceae;s__unidentified_Ruminococcaceae	0.9975811189860035
ASV_24840	d__Bacteria;p__Firmicutes;c__Clostridia;o__Clostridiales;f__Ruminococcaceae;g__Oscillospira;s__unidentified_Oscillospira	0.9982214675489902
ASV_6464	d__Bacteria;p__Firmicutes;c__Clostridia;o__Clostridiales;f__unidentified_Clostridiales;g__unidentified_Clostridiales;s__unidentified_Clostridiales	0.8354295388334024
ASV_13679	d__Bacteria;p__Tenericutes;c__Mollicutes;o__Anaeroplasmatales;f__Anaeroplasmataceae;g__Anaeroplasma;s__unidentified_Anaeroplasma	0.9999999813106231
ASV_19493	d__Bacteria;p__Proteobacteria;c__Gammaproteobacteria;o__Pseudomonadales;f__Moraxellaceae;g__Acinetobacter;s__Acinetobacter_guillouiae	0.8802047200624902
ASV_24399	d__Bacteria;p__Firmicutes;c__Clostridia;o__Clostridiales;f__Ruminococcaceae;g__unidentified_Ruminococcaceae;s__unidentified_Ruminococcaceae	0.999852944738243
ASV_19918	d__Bacteria;p__Firmicutes;c__Clostridia;o__Clostridiales;f__Ruminococcaceae;g__unidentified_Ruminococcaceae;s__unidentified_Ruminococcaceae	0.9948780872966484
ASV_2408	d__Bacteria;p__Firmicutes;c__Clostridia;o__Clostridiales;f__Lachnospiraceae;g__unclassified_Lachnospiraceae;s__unclassified_Lachnospiraceae	0.8500965403514438
ASV_24318	d__Bacteria;p__Bacteroidetes;c__Bacteroidia;o__Bacteroidales;f__S24-7;g__unidentified_S24-7;s__unidentified_S24-7	0.9999988824486074
ASV_16657	d__Bacteria;p__Chloroflexi;c__Ktedonobacteria;o__JG30-KF-AS9;f__unidentified_JG30-KF-AS9;g__unidentified_JG30-KF-AS9;s__unidentified_JG30-KF-AS9	0.9999960647115086
ASV_21874	d__Bacteria;p__Actinobacteria;c__Actinobacteria;o__Actinomycetales;f__Geodermatophilaceae;g__unclassified_Geodermatophilaceae;s__unclassified_Geodermatophilaceae	0.999380275038503
ASV_16764	d__Bacteria;p__Firmicutes;c__Clostridia;o__Clostridiales;f__Ruminococcaceae;g__unidentified_Ruminococcaceae;s__unidentified_Ruminococcaceae	0.9857028787874939
ASV_26462	d__Bacteria;p__Firmicutes;c__Clostridia;o__Clostridiales;f__Lachnospiraceae;g__unidentified_Lachnospiraceae;s__unidentified_Lachnospiraceae	0.8218311666387657
ASV_14776	d__Bacteria;p__Firmicutes;c__Bacilli;o__Lactobacillales;f__Lactobacillaceae;g__Lactobacillus;s__unclassified_Lactobacillus	0.9999927871319315
ASV_14195	d__Bacteria;p__Firmicutes;c__Clostridia;o__Clostridiales;f__[Mogibacteriaceae];g__unidentified_[Mogibacteriaceae];s__unidentified_[Mogibacteriaceae]	0.9945659885845101
ASV_8863	d__Bacteria;p__Proteobacteria;c__Alphaproteobacteria;o__Rhizobiales;f__Bradyrhizobiaceae;g__unclassified_Bradyrhizobiaceae;s__unclassified_Bradyrhizobiaceae	0.9999947447665501
ASV_15335	d__Bacteria;p__Proteobacteria;c__Alphaproteobacteria;o__Sphingomonadales;f__Sphingomonadaceae;g__Sphingomonas;s__Sphingomonas_wittichii	0.9996609080834131
ASV_5497	d__Bacteria;p__Firmicutes;c__Clostridia;o__Clostridiales;f__Ruminococcaceae;g__Ruminococcus;s__Ruminococcus_flavefaciens	0.999994392578718
ASV_18674	d__Bacteria;p__Actinobacteria;c__Actinobacteria;o__Actinomycetales;f__Mycobacteriaceae;g__Mycobacterium;s__unclassified_Mycobacterium	0.9999635803620812
ASV_23129	d__Bacteria;p__Gemmatimonadetes;c__Gemmatimonadetes;o__Ellin5290;f__unidentified_Ellin5290;g__unidentified_Ellin5290;s__unidentified_Ellin5290	0.9999879274575965
ASV_2296	d__Bacteria;p__Actinobacteria;c__Actinobacteria;o__Actinomycetales;f__Micrococcaceae;g__Arthrobacter;s__unclassified_Arthrobacter	0.9328213581512184
ASV_6870	d__Bacteria;p__Firmicutes;c__Clostridia;o__Clostridiales;f__unidentified_Clostridiales;g__unidentified_Clostridiales;s__unidentified_Clostridiales	0.9998608869133105
ASV_10249	d__Bacteria;p__Bacteroidetes;c__Bacteroidia;o__Bacteroidales;f__S24-7;g__unidentified_S24-7;s__unidentified_S24-7	0.9999978326766733
ASV_3591	d__Bacteria;p__Firmicutes;c__Bacilli;o__Bacillales;f__Bacillaceae;g__Bacillus;s__Bacillus_fumarioli	0.9896786844495286
ASV_10578	d__Bacteria;p__Firmicutes;c__Clostridia;o__Clostridiales;f__unidentified_Clostridiales;g__unidentified_Clostridiales;s__unidentified_Clostridiales	0.9998648500673853
ASV_21638	d__Bacteria;p__Bacteroidetes;c__Bacteroidia;o__Bacteroidales;f__Rikenellaceae;g__unclassified_Rikenellaceae;s__unclassified_Rikenellaceae	0.9999999669444319
ASV_18582	d__Bacteria;p__Firmicutes;c__Clostridia;o__Clostridiales;f__Dehalobacteriaceae;g__unidentified_Dehalobacteriaceae;s__unidentified_Dehalobacteriaceae	0.9999457582159748
ASV_16161	d__Bacteria;p__Actinobacteria;c__Thermoleophilia;o__Solirubrobacterales;f__Patulibacteraceae;g__unidentified_Patulibacteraceae;s__unidentified_Patulibacteraceae	0.9998669500587468
ASV_6290	d__Bacteria;p__Spirochaetes;c__Spirochaetes;o__Spirochaetales;f__Spirochaetaceae;g__Treponema;s__unidentified_Treponema	0.9999903950739215
ASV_543	d__Bacteria;p__Proteobacteria;c__Alphaproteobacteria;o__Caulobacterales;f__Caulobacteraceae;g__unclassified_Caulobacteraceae;s__unclassified_Caulobacteraceae	0.9999999955101219
ASV_3347	d__Bacteria;p__Firmicutes;c__Clostridia;o__Clostridiales;f__Peptostreptococcaceae;g__unidentified_Peptostreptococcaceae;s__unidentified_Peptostreptococcaceae	0.8006519285332118
ASV_25757	d__Bacteria;p__Firmicutes;c__Clostridia;o__Clostridiales;f__unidentified_Clostridiales;g__unidentified_Clostridiales;s__unidentified_Clostridiales	0.9999697206178428
ASV_21859	d__Bacteria;p__Actinobacteria;c__Coriobacteriia;o__Coriobacteriales;f__Coriobacteriaceae;g__Adlercreutzia;s__unidentified_Adlercreutzia	0.9962994640688101
ASV_19272	d__Bacteria;p__Proteobacteria;c__Gammaproteobacteria;o__Legionellales;f__unidentified_Legionellales;g__unidentified_Legionellales;s__unidentified_Legionellales	0.9878375243809473
ASV_11451	d__Bacteria;p__Bacteroidetes;c__Bacteroidia;o__Bacteroidales;f__S24-7;g__unidentified_S24-7;s__unidentified_S24-7	0.9999982600954598
ASV_7190	d__Bacteria;p__Proteobacteria;c__Betaproteobacteria;o__SC-I-84;f__unidentified_SC-I-84;g__unidentified_SC-I-84;s__unidentified_SC-I-84	0.9999960456342504
ASV_4725	d__Bacteria;p__Firmicutes;c__Clostridia;o__Clostridiales;f__Ruminococcaceae;g__Faecalibacterium;s__Faecalibacterium_prausnitzii	0.9998641293487607
ASV_7459	d__Bacteria;p__Proteobacteria;c__Gammaproteobacteria;o__Pseudomonadales;f__Moraxellaceae;g__Acinetobacter;s__unidentified_Acinetobacter	0.9990304883774244
ASV_18890	d__Bacteria;p__Firmicutes;c__Clostridia;o__Clostridiales;f__Peptostreptococcaceae;g__Clostridium;s__Clostridium_sticklandii	0.9991825763428268
ASV_6557	d__Bacteria;p__Firmicutes;c__Clostridia;o__Clostridiales;f__Ruminococcaceae;g__Oscillospira;s__unclassified_Oscillospira	0.999843952165832
ASV_26198	d__Bacteria;p__Acidobacteria;c__Acidobacteriia;o__Acidobacteriales;f__Acidobacteriaceae;g__unidentified_Acidobacteriaceae;s__unidentified_Acidobacteriaceae	0.9998323485720808
ASV_18096	d__Bacteria;p__Proteobacteria;c__Gammaproteobacteria;o__Xanthomonadales;f__Xanthomonadaceae;g__Rhodanobacter;s__unclassified_Rhodanobacter	0.9965975193425359
ASV_2537	d__Bacteria;p__Firmicutes;c__Clostridia;o__Clostridiales;f__Ruminococcaceae;g__Ruminococcus;s__Ruminococcus_bromii	0.9999262000577105
ASV_11578	d__Bacteria;p__Firmicutes;c__Clostridia;o__Clostridiales;f__Ruminococcaceae;g__Ruminococcus;s__unidentified_Ruminococcus	0.9277160483583393
ASV_14112	d__Bacteria;p__Firmicutes;c__Clostridia;o__Clostridiales;f__Ruminococcaceae;g__unclassified_Ruminococcaceae;s__unclassified_Ruminococcaceae	0.9990935218909087
ASV_16253	d__Bacteria;p__Firmicutes;c__Clostridia;o__Clostridiales;f__Ruminococcaceae;g__unidentified_Ruminococcaceae;s__unidentified_Ruminococcaceae	0.9972307408119482
ASV_4483	d__Bacteria;p__Firmicutes;c__Clostridia;o__Clostridiales;f__Lachnospiraceae;g__unclassified_Lachnospiraceae;s__unclassified_Lachnospiraceae	0.7278193589935543
ASV_25093	d__Bacteria;p__Proteobacteria;c__Gammaproteobacteria;o__Pseudomonadales;f__Moraxellaceae;g__Acinetobacter;s__unidentified_Acinetobacter	0.744543327085276
ASV_13432	d__Bacteria;p__Bacteroidetes;c__Bacteroidia;o__Bacteroidales;f__S24-7;g__unidentified_S24-7;s__unidentified_S24-7	0.9999999553705844
ASV_14226	d__Bacteria;p__Firmicutes;c__Clostridia;o__Clostridiales;f__Dehalobacteriaceae;g__Dehalobacterium;s__unidentified_Dehalobacterium	0.9991530005318852
ASV_24025	d__Bacteria;p__Firmicutes;c__Clostridia;o__Clostridiales;f__Lachnospiraceae;g__unidentified_Lachnospiraceae;s__unidentified_Lachnospiraceae	0.9431564534904886
ASV_26440	d__Bacteria;p__Firmicutes;c__Clostridia;o__Clostridiales;f__Ruminococcaceae;g__Oscillospira;s__unidentified_Oscillospira	0.9997954327375306
ASV_5155	d__Bacteria;p__Proteobacteria;c__Betaproteobacteria;o__Burkholderiales;f__Alcaligenaceae;g__unclassified_Alcaligenaceae;s__unclassified_Alcaligenaceae	0.9999740246527
ASV_26422	d__Bacteria;p__Tenericutes;c__Mollicutes;o__RF39;f__unidentified_RF39;g__unidentified_RF39;s__unidentified_RF39	0.9999999999466809
ASV_22034	d__Bacteria;p__Actinobacteria;c__Coriobacteriia;o__Coriobacteriales;f__Coriobacteriaceae;g__Adlercreutzia;s__unidentified_Adlercreutzia	0.9992198147688746
ASV_947	d__Bacteria;p__Tenericutes;c__Mollicutes;o__RF39;f__unidentified_RF39;g__unidentified_RF39;s__unidentified_RF39	0.9999999996165059
ASV_15833	d__Bacteria;p__[Thermi];c__Deinococci;o__Thermales;f__Thermaceae;g__Thermus;s__unidentified_Thermus	0.9999999999990621
ASV_22450	d__Bacteria;p__Firmicutes;c__Clostridia;o__Clostridiales;f__Veillonellaceae;g__Phascolarctobacterium;s__unidentified_Phascolarctobacterium	0.9999999983592716
ASV_15409	d__Bacteria;p__Firmicutes;c__Clostridia;o__Clostridiales;f__Ruminococcaceae;g__Oscillospira;s__unidentified_Oscillospira	0.9998856015352445
ASV_8782	d__Bacteria;p__Bacteroidetes;c__Bacteroidia;o__Bacteroidales;f__RF16;g__unidentified_RF16;s__unidentified_RF16	0.9999999968385964
ASV_14992	d__Bacteria;p__Proteobacteria;c__Alphaproteobacteria;o__Rhizobiales;f__Hyphomicrobiaceae;g__Devosia;s__unidentified_Devosia	0.9999461899794632
ASV_15219	d__Bacteria;p__Proteobacteria;c__Alphaproteobacteria;o__RF32;f__unidentified_RF32;g__unidentified_RF32;s__unidentified_RF32	0.9999999931544039
ASV_25639	d__Bacteria;p__Firmicutes;c__Clostridia;o__Clostridiales;f__Lachnospiraceae;g__unclassified_Lachnospiraceae;s__unclassified_Lachnospiraceae	0.9451037082283273
ASV_24310	d__Bacteria;p__Bacteroidetes;c__[Saprospirae];o__[Saprospirales];f__Chitinophagaceae;g__unidentified_Chitinophagaceae;s__unidentified_Chitinophagaceae	0.9972948265400333
ASV_23295	d__Bacteria;p__Proteobacteria;c__Alphaproteobacteria;o__Ellin329;f__unidentified_Ellin329;g__unidentified_Ellin329;s__unidentified_Ellin329	0.9999997556073211
ASV_21052	d__Bacteria;p__Firmicutes;c__Clostridia;o__Clostridiales;f__Lachnospiraceae;g__Roseburia;s__unidentified_Roseburia	0.922577583846944
ASV_13194	d__Bacteria;p__Firmicutes;c__Clostridia;o__Clostridiales;f__Ruminococcaceae;g__Oscillospira;s__unidentified_Oscillospira	0.9994855484514
ASV_21016	d__Bacteria;p__Firmicutes;c__Clostridia;o__Clostridiales;f__Ruminococcaceae;g__Oscillospira;s__unidentified_Oscillospira	0.8696502783084261
ASV_8577	d__Bacteria;p__Actinobacteria;c__Actinobacteria;o__Actinomycetales;f__Intrasporangiaceae;g__unclassified_Intrasporangiaceae;s__unclassified_Intrasporangiaceae	0.9996287871394397
ASV_8148	d__Bacteria;p__Firmicutes;c__Clostridia;o__Clostridiales;f__Ruminococcaceae;g__Oscillospira;s__unidentified_Oscillospira	0.999917409320994
ASV_12743	d__Bacteria;p__Actinobacteria;c__Coriobacteriia;o__Coriobacteriales;f__Coriobacteriaceae;g__unidentified_Coriobacteriaceae;s__unidentified_Coriobacteriaceae	0.9861761483074217
ASV_15438	d__Bacteria;p__Firmicutes;c__Clostridia;o__Clostridiales;f__Ruminococcaceae;g__unidentified_Ruminococcaceae;s__unidentified_Ruminococcaceae	0.996071941663756
ASV_23380	d__Bacteria;p__Firmicutes;c__Clostridia;o__Clostridiales;f__Clostridiaceae;g__SMB53;s__unidentified_SMB53	0.8840473528049995
ASV_7978	d__Bacteria;p__Firmicutes;c__Clostridia;o__Clostridiales;f__Clostridiaceae;g__Proteiniclasticum;s__unidentified_Proteiniclasticum	0.9999929834401685
ASV_13089	d__Bacteria;p__Actinobacteria;c__Actinobacteria;o__Micrococcales;f__unidentified_Micrococcales;g__unidentified_Micrococcales;s__unidentified_Micrococcales	0.9999999996470024
ASV_13641	d__Bacteria;p__Actinobacteria;c__Actinobacteria;o__Actinomycetales;f__Nocardioidaceae;g__Nocardioides;s__unidentified_Nocardioides	0.8466380741232666
ASV_13259	d__Bacteria;p__Chlamydiae;c__Chlamydiia;o__Chlamydiales;f__Parachlamydiaceae;g__Candidatus_Protochlamydia;s__unidentified_Candidatus_Protochlamydia	0.8813746831159781
ASV_1187	d__Bacteria;p__Bacteroidetes;c__Bacteroidia;o__Bacteroidales;f__Bacteroidaceae;g__Bacteroides;s__unclassified_Bacteroides	0.9999999902323256
ASV_13081	d__Bacteria;p__Bacteroidetes;c__Bacteroidia;o__Bacteroidales;f__S24-7;g__unidentified_S24-7;s__unidentified_S24-7	0.9999997966979699
ASV_26213	d__Bacteria;p__Firmicutes;c__Clostridia;o__Clostridiales;f__Lachnospiraceae;g__unidentified_Lachnospiraceae;s__unidentified_Lachnospiraceae	0.8533905437603625
ASV_11329	d__Bacteria;p__Firmicutes;c__Clostridia;o__Clostridiales;f__[Mogibacteriaceae];g__unidentified_[Mogibacteriaceae];s__unidentified_[Mogibacteriaceae]	0.9970304326373948
ASV_34	d__Bacteria;p__Firmicutes;c__Clostridia;o__Clostridiales;f__Lachnospiraceae;g__unidentified_Lachnospiraceae;s__unidentified_Lachnospiraceae	0.9703412515178063
ASV_13223	d__Bacteria;p__Bacteroidetes;c__Flavobacteriia;o__Flavobacteriales;f__Flavobacteriaceae;g__Flavobacterium;s__Flavobacterium_frigidarium	0.9981681365976046
ASV_20288	d__Bacteria;p__Proteobacteria;c__Gammaproteobacteria;o__Pseudomonadales;f__Pseudomonadaceae;g__Pseudomonas;s__Pseudomonas_veronii	0.7332759563077431
ASV_23885	d__Bacteria;p__Firmicutes;c__Clostridia;o__Clostridiales;f__Ruminococcaceae;g__Ruminococcus;s__unidentified_Ruminococcus	0.9208063594945962
ASV_3049	d__Bacteria;p__Firmicutes;c__Clostridia;o__Clostridiales;f__Ruminococcaceae;g__Ruminococcus;s__unidentified_Ruminococcus	0.9021113409894358
ASV_21538	d__Bacteria;p__TM7;c__TM7-1;o__unidentified_TM7-1;f__unidentified_TM7-1;g__unidentified_TM7-1;s__unidentified_TM7-1	0.9999896845849309
ASV_8617	d__Bacteria;p__Firmicutes;c__Clostridia;o__Clostridiales;f__Ruminococcaceae;g__unidentified_Ruminococcaceae;s__unidentified_Ruminococcaceae	0.8908932206464684
ASV_18671	d__Bacteria;p__Firmicutes;c__Clostridia;o__Clostridiales;f__Ruminococcaceae;g__Oscillospira;s__unidentified_Oscillospira	0.9987847743184672
ASV_98	d__Bacteria;p__Firmicutes;c__Clostridia;o__Clostridiales;f__unidentified_Clostridiales;g__unidentified_Clostridiales;s__unidentified_Clostridiales	0.9998282648564055
ASV_18663	d__Bacteria;p__Firmicutes;c__Clostridia;o__Clostridiales;f__Lachnospiraceae;g__unidentified_Lachnospiraceae;s__unidentified_Lachnospiraceae	0.9272134385352441
ASV_5499	d__Bacteria;p__Firmicutes;c__Clostridia;o__Clostridiales;f__Christensenellaceae;g__unidentified_Christensenellaceae;s__unidentified_Christensenellaceae	0.9986325892567526
ASV_17584	d__Bacteria;p__Firmicutes;c__Bacilli;o__Lactobacillales;f__Lactobacillaceae;g__Lactobacillus;s__unclassified_Lactobacillus	0.8340678875865
ASV_17224	d__Bacteria;p__Firmicutes;c__Erysipelotrichi;o__Erysipelotrichales;f__Erysipelotrichaceae;g__L7A_E11;s__unidentified_L7A_E11	0.999999859854749
ASV_10457	d__Bacteria;p__Proteobacteria;c__Gammaproteobacteria;o__Xanthomonadales;f__Xanthomonadaceae;g__unidentified_Xanthomonadaceae;s__unidentified_Xanthomonadaceae	0.9946695609696588
ASV_22739	d__Bacteria;p__Actinobacteria;c__Coriobacteriia;o__Coriobacteriales;f__Coriobacteriaceae;g__Adlercreutzia;s__unidentified_Adlercreutzia	0.9321202612506243
ASV_21074	d__Bacteria;p__Firmicutes;c__Clostridia;o__Clostridiales;f__[Mogibacteriaceae];g__unidentified_[Mogibacteriaceae];s__unidentified_[Mogibacteriaceae]	0.9999994470172561
ASV_11763	d__Bacteria;p__Proteobacteria;c__Alphaproteobacteria;o__Rhodospirillales;f__Acetobacteraceae;g__unidentified_Acetobacteraceae;s__unidentified_Acetobacteraceae	0.9924631959050222
ASV_12234	d__Bacteria;p__Proteobacteria;c__Alphaproteobacteria;o__Rhizobiales;f__Bradyrhizobiaceae;g__unclassified_Bradyrhizobiaceae;s__unclassified_Bradyrhizobiaceae	0.9999493218966413
ASV_25720	d__Bacteria;p__Firmicutes;c__Clostridia;o__Clostridiales;f__Clostridiaceae;g__Clostridium;s__Clostridium_bowmanii	0.9999987314957454
ASV_19274	d__Bacteria;p__Bacteroidetes;c__Bacteroidia;o__Bacteroidales;f__Bacteroidaceae;g__Bacteroides;s__unidentified_Bacteroides	0.9215207466255758
ASV_11813	d__Bacteria;p__Firmicutes;c__Clostridia;o__Clostridiales;f__Ruminococcaceae;g__Oscillospira;s__unidentified_Oscillospira	0.9984143246657445
ASV_8342	d__Bacteria;p__Chloroflexi;c__Thermomicrobia;o__unidentified_Thermomicrobia;f__unidentified_Thermomicrobia;g__unidentified_Thermomicrobia;s__unidentified_Thermomicrobia	0.9999641315563873
ASV_8360	d__Bacteria;p__Bacteroidetes;c__Bacteroidia;o__Bacteroidales;f__Porphyromonadaceae;g__Parabacteroides;s__unidentified_Parabacteroides	0.9516045558166052
ASV_25580	d__Bacteria;p__Actinobacteria;c__Actinobacteria;o__Actinomycetales;f__Sporichthyaceae;g__unidentified_Sporichthyaceae;s__unidentified_Sporichthyaceae	0.9923350302753106
ASV_22213	d__Bacteria;p__Acidobacteria;c__Solibacteres;o__Solibacterales;f__Solibacteraceae;g__unidentified_Solibacteraceae;s__unidentified_Solibacteraceae	0.9113160441231518
ASV_345	d__Bacteria;p__Firmicutes;c__Clostridia;o__Clostridiales;f__Ruminococcaceae;g__unidentified_Ruminococcaceae;s__unidentified_Ruminococcaceae	0.9883098160469023
ASV_25816	d__Bacteria;p__Firmicutes;c__Clostridia;o__Clostridiales;f__unidentified_Clostridiales;g__unidentified_Clostridiales;s__unidentified_Clostridiales	0.9998747581131172
ASV_25893	d__Bacteria;p__Firmicutes;c__Clostridia;o__Clostridiales;f__unidentified_Clostridiales;g__unidentified_Clostridiales;s__unidentified_Clostridiales	0.9999832272243394
ASV_23736	d__Bacteria;p__Proteobacteria;c__Betaproteobacteria;o__Burkholderiales;f__Alcaligenaceae;g__Sutterella;s__unidentified_Sutterella	0.9999999334934864
ASV_16359	d__Bacteria;p__Proteobacteria;c__Alphaproteobacteria;o__Rhizobiales;f__Methylobacteriaceae;g__unidentified_Methylobacteriaceae;s__unidentified_Methylobacteriaceae	0.9999799375572984
ASV_4331	d__Bacteria;p__Proteobacteria;c__Betaproteobacteria;o__SC-I-84;f__unidentified_SC-I-84;g__unidentified_SC-I-84;s__unidentified_SC-I-84	0.998818462358112
ASV_3532	d__Bacteria;p__Proteobacteria;c__Alphaproteobacteria;o__Rickettsiales;f__mitochondria;g__Silene;s__Silene_vulgaris	0.9258516412790287
ASV_16027	d__Bacteria;p__Bacteroidetes;c__Bacteroidia;o__Bacteroidales;f__BS11;g__unidentified_BS11;s__unidentified_BS11	0.9999804446494394
ASV_2284	d__Bacteria;p__Firmicutes;c__Clostridia;o__Clostridiales;f__Ruminococcaceae;g__unidentified_Ruminococcaceae;s__unidentified_Ruminococcaceae	0.9870047168636015
ASV_16726	d__Bacteria;p__Bacteroidetes;c__Flavobacteriia;o__Flavobacteriales;f__Flavobacteriaceae;g__Flavobacterium;s__unidentified_Flavobacterium	0.9990705436101683
ASV_21878	d__Bacteria;p__Firmicutes;c__Clostridia;o__Clostridiales;f__Ruminococcaceae;g__Oscillospira;s__unidentified_Oscillospira	0.9975248805388452
ASV_16534	d__Bacteria;p__Firmicutes;c__Bacilli;o__Lactobacillales;f__Leuconostocaceae;g__Weissella;s__Weissella_paramesenteroides	0.828386627692623
ASV_22291	d__Bacteria;p__Firmicutes;c__Clostridia;o__Clostridiales;f__Ruminococcaceae;g__Oscillospira;s__unidentified_Oscillospira	0.996793162845706
ASV_610	d__Bacteria;p__Proteobacteria;c__Alphaproteobacteria;o__Caulobacterales;f__Caulobacteraceae;g__Brevundimonas;s__unidentified_Brevundimonas	0.9908240832697691
ASV_5639	d__Bacteria;p__Firmicutes;c__Clostridia;o__Clostridiales;f__unclassified_Clostridiales;g__unclassified_Clostridiales;s__unclassified_Clostridiales	0.9993930226960976
ASV_3157	d__Bacteria;p__Firmicutes;c__Clostridia;o__Clostridiales;f__Ruminococcaceae;g__Oscillospira;s__unidentified_Oscillospira	0.99990723709244
ASV_14229	d__Bacteria;p__[Thermi];c__Deinococci;o__Deinococcales;f__Deinococcaceae;g__Deinococcus;s__unidentified_Deinococcus	0.99999972339982
ASV_7287	d__Bacteria;p__Firmicutes;c__Clostridia;o__Clostridiales;f__Peptostreptococcaceae;g__unidentified_Peptostreptococcaceae;s__unidentified_Peptostreptococcaceae	0.7641809521452608
ASV_2214	d__Bacteria;p__Firmicutes;c__Bacilli;o__Bacillales;f__Bacillaceae;g__Bacillus;s__unidentified_Bacillus	0.8314902644568881
ASV_5156	d__Bacteria;p__Firmicutes;c__Clostridia;o__Clostridiales;f__Ruminococcaceae;g__unidentified_Ruminococcaceae;s__unidentified_Ruminococcaceae	0.8804873628057631
ASV_21596	d__Bacteria;p__Bacteroidetes;c__Bacteroidia;o__Bacteroidales;f__Prevotellaceae;g__Prevotella;s__unidentified_Prevotella	0.9877558709549764
ASV_14011	d__Bacteria;p__Firmicutes;c__Clostridia;o__Clostridiales;f__Ruminococcaceae;g__Ruminococcus;s__unidentified_Ruminococcus	0.9999427033013945
ASV_1886	d__Bacteria;p__Firmicutes;c__Clostridia;o__Clostridiales;f__Lachnospiraceae;g__unidentified_Lachnospiraceae;s__unidentified_Lachnospiraceae	0.9361644447565597
ASV_18774	d__Bacteria;p__Firmicutes;c__unclassified_Firmicutes;o__unclassified_Firmicutes;f__unclassified_Firmicutes;g__unclassified_Firmicutes;s__unclassified_Firmicutes	0.999499147531168
ASV_10558	d__Bacteria;p__Firmicutes;c__Clostridia;o__Clostridiales;f__Ruminococcaceae;g__unidentified_Ruminococcaceae;s__unidentified_Ruminococcaceae	0.9944990315755962
ASV_24205	d__Bacteria;p__Actinobacteria;c__Actinobacteria;o__Actinomycetales;f__Micrococcaceae;g__Arthrobacter;s__unclassified_Arthrobacter	0.954641526758741
ASV_26260	d__Bacteria;p__Firmicutes;c__Clostridia;o__Clostridiales;f__Ruminococcaceae;g__unidentified_Ruminococcaceae;s__unidentified_Ruminococcaceae	0.9040926693119611
ASV_8620	d__Bacteria;p__Firmicutes;c__Clostridia;o__Clostridiales;f__Ruminococcaceae;g__Ruminococcus;s__unidentified_Ruminococcus	0.9997372306705806
ASV_18304	d__Bacteria;p__Tenericutes;c__Mollicutes;o__RF39;f__unidentified_RF39;g__unidentified_RF39;s__unidentified_RF39	0.9999999994334701
ASV_17155	d__Bacteria;p__Firmicutes;c__Clostridia;o__Clostridiales;f__Ruminococcaceae;g__Ruminococcus;s__Ruminococcus_callidus	0.8025162383143521
ASV_10373	d__Bacteria;p__Actinobacteria;c__Actinobacteria;o__Actinomycetales;f__Micromonosporaceae;g__unclassified_Micromonosporaceae;s__unclassified_Micromonosporaceae	0.9999471175649589
ASV_4156	d__Bacteria;p__Bacteroidetes;c__Bacteroidia;o__Bacteroidales;f__Prevotellaceae;g__Prevotella;s__unidentified_Prevotella	0.9997007884678736
ASV_11112	d__Bacteria;p__Bacteroidetes;c__Bacteroidia;o__Bacteroidales;f__S24-7;g__unidentified_S24-7;s__unidentified_S24-7	0.9999755116482403
ASV_11672	d__Bacteria;p__Tenericutes;c__Mollicutes;o__RF39;f__unidentified_RF39;g__unidentified_RF39;s__unidentified_RF39	0.9999999999421618
ASV_518	d__Bacteria;p__Actinobacteria;c__Actinobacteria;o__Bifidobacteriales;f__Bifidobacteriaceae;g__Bifidobacterium;s__Bifidobacterium_longum	0.9901188909795986
ASV_14767	d__Bacteria;p__Firmicutes;c__Clostridia;o__Clostridiales;f__Ruminococcaceae;g__unidentified_Ruminococcaceae;s__unidentified_Ruminococcaceae	0.9965662369293062
ASV_3022	d__Bacteria;p__Firmicutes;c__Bacilli;o__Lactobacillales;f__Streptococcaceae;g__Streptococcus;s__Streptococcus_alactolyticus	0.8369188218903802
ASV_118	d__Bacteria;p__Firmicutes;c__Clostridia;o__Clostridiales;f__Ruminococcaceae;g__Oscillospira;s__unidentified_Oscillospira	0.9950737084413702
ASV_624	d__Bacteria;p__Firmicutes;c__Clostridia;o__Clostridiales;f__unclassified_Clostridiales;g__unclassified_Clostridiales;s__unclassified_Clostridiales	0.9999999999546554
ASV_2294	d__Bacteria;p__Actinobacteria;c__Acidimicrobiia;o__Acidimicrobiales;f__EB1017;g__unidentified_EB1017;s__unidentified_EB1017	0.9999931591533843
ASV_20771	d__Bacteria;p__Firmicutes;c__Clostridia;o__Clostridiales;f__Lachnospiraceae;g__[Ruminococcus];s__[Ruminococcus]_gnavus	0.9947145053967906
ASV_3017	d__Bacteria;p__Chlamydiae;c__Chlamydiia;o__unidentified_Chlamydiia;f__unidentified_Chlamydiia;g__unidentified_Chlamydiia;s__unidentified_Chlamydiia	0.9749201012772907
ASV_22280	d__Bacteria;p__Proteobacteria;c__Alphaproteobacteria;o__Rhizobiales;f__Rhizobiaceae;g__Agrobacterium;s__unidentified_Agrobacterium	0.8645171138599549
ASV_17126	d__Bacteria;p__Acidobacteria;c__Solibacteres;o__Solibacterales;f__Solibacteraceae;g__Candidatus_Solibacter;s__unidentified_Candidatus_Solibacter	0.99994097794725
ASV_22606	d__Bacteria;p__Firmicutes;c__Bacilli;o__Bacillales;f__Staphylococcaceae;g__Staphylococcus;s__unclassified_Staphylococcus	0.7897506810038049
ASV_11926	d__Bacteria;p__Bacteroidetes;c__Bacteroidia;o__Bacteroidales;f__Prevotellaceae;g__Prevotella;s__unidentified_Prevotella	0.999815942537687
ASV_21049	d__Bacteria;p__Firmicutes;c__Clostridia;o__Clostridiales;f__Clostridiaceae;g__Clostridium;s__unidentified_Clostridium	0.9552419049806188
ASV_5720	d__Bacteria;p__Firmicutes;c__Bacilli;o__Bacillales;f__[Exiguobacteraceae];g__unidentified_[Exiguobacteraceae];s__unidentified_[Exiguobacteraceae]	0.7547583897480098
ASV_7133	d__Bacteria;p__Bacteroidetes;c__Bacteroidia;o__Bacteroidales;f__[Paraprevotellaceae];g__CF231;s__unidentified_CF231	0.9998936212564327
ASV_18223	d__Bacteria;p__Actinobacteria;c__Actinobacteria;o__Actinomycetales;f__Micrococcaceae;g__Arthrobacter;s__unclassified_Arthrobacter	0.9726827993548787
ASV_7580	d__Bacteria;p__Firmicutes;c__Bacilli;o__Bacillales;f__unclassified_Bacillales;g__unclassified_Bacillales;s__unclassified_Bacillales	0.9999998225381421
ASV_11552	d__Bacteria;p__Firmicutes;c__Clostridia;o__Clostridiales;f__Lachnospiraceae;g__[Ruminococcus];s__[Ruminococcus]_gnavus	0.9940108781719998
ASV_7729	d__Bacteria;p__Firmicutes;c__Clostridia;o__Clostridiales;f__Christensenellaceae;g__unidentified_Christensenellaceae;s__unidentified_Christensenellaceae	0.9999963034260699
ASV_3437	d__Bacteria;p__Firmicutes;c__Bacilli;o__Bacillales;f__Bacillaceae;g__Bacillus;s__unclassified_Bacillus	0.9647027159291052
ASV_17644	d__Bacteria;p__Proteobacteria;c__Alphaproteobacteria;o__Sphingomonadales;f__Sphingomonadaceae;g__Sphingomonas;s__unidentified_Sphingomonas	0.9833397111010623
ASV_24436	d__Bacteria;p__Firmicutes;c__Bacilli;o__Lactobacillales;f__Lactobacillaceae;g__Lactobacillus;s__unidentified_Lactobacillus	0.9990443642713989
ASV_6442	d__Bacteria;p__Bacteroidetes;c__Bacteroidia;o__Bacteroidales;f__unidentified_Bacteroidales;g__unidentified_Bacteroidales;s__unidentified_Bacteroidales	0.9999887903596113
ASV_21433	d__Bacteria;p__Firmicutes;c__Clostridia;o__Clostridiales;f__Lachnospiraceae;g__Coprococcus;s__unidentified_Coprococcus	0.9964905916685705
ASV_481	d__Bacteria;p__Bacteroidetes;c__Bacteroidia;o__Bacteroidales;f__S24-7;g__unidentified_S24-7;s__unidentified_S24-7	0.9999999191858852
ASV_17414	d__Bacteria;p__Bacteroidetes;c__Flavobacteriia;o__Flavobacteriales;f__[Weeksellaceae];g__unidentified_[Weeksellaceae];s__unidentified_[Weeksellaceae]	0.999203463187135
ASV_25499	d__Bacteria;p__Actinobacteria;c__Actinobacteria;o__Actinomycetales;f__Streptomycetaceae;g__Streptomyces;s__Streptomyces_reticuliscabiei	0.9425563680259694
ASV_18228	d__Bacteria;p__Proteobacteria;c__Gammaproteobacteria;o__Xanthomonadales;f__Xanthomonadaceae;g__Pseudoxanthomonas;s__Pseudoxanthomonas_taiwanensis	0.9962205899472387
ASV_17826	d__Bacteria;p__Firmicutes;c__Clostridia;o__Clostridiales;f__Ruminococcaceae;g__unidentified_Ruminococcaceae;s__unidentified_Ruminococcaceae	0.9461565638147859
ASV_9084	d__Bacteria;p__Proteobacteria;c__Epsilonproteobacteria;o__Campylobacterales;f__Helicobacteraceae;g__Helicobacter;s__Helicobacter_pylori	0.9969106340714989
ASV_20828	d__Bacteria;p__WPS-2;c__unidentified_WPS-2;o__unidentified_WPS-2;f__unidentified_WPS-2;g__unidentified_WPS-2;s__unidentified_WPS-2	0.9999998422049838
ASV_7771	d__Bacteria;p__Firmicutes;c__Clostridia;o__Clostridiales;f__unidentified_Clostridiales;g__unidentified_Clostridiales;s__unidentified_Clostridiales	0.9999520028068489
ASV_19677	d__Bacteria;p__Firmicutes;c__Clostridia;o__Clostridiales;f__Ruminococcaceae;g__Oscillospira;s__unidentified_Oscillospira	0.9991722311268366
ASV_4137	d__Bacteria;p__Firmicutes;c__Clostridia;o__Clostridiales;f__Ruminococcaceae;g__unidentified_Ruminococcaceae;s__unidentified_Ruminococcaceae	0.9987232083692609
ASV_5217	d__Bacteria;p__Bacteroidetes;c__Flavobacteriia;o__Flavobacteriales;f__Flavobacteriaceae;g__Flavobacterium;s__Flavobacterium_frigidarium	0.9996286273722731
ASV_6525	d__Bacteria;p__Proteobacteria;c__Gammaproteobacteria;o__Pseudomonadales;f__Pseudomonadaceae;g__Pseudomonas;s__unclassified_Pseudomonas	0.9758965261938722
ASV_1869	d__Bacteria;p__Proteobacteria;c__Betaproteobacteria;o__SC-I-84;f__unidentified_SC-I-84;g__unidentified_SC-I-84;s__unidentified_SC-I-84	0.9999867271749908
ASV_13754	d__Bacteria;p__Firmicutes;c__Erysipelotrichi;o__Erysipelotrichales;f__Erysipelotrichaceae;g__unidentified_Erysipelotrichaceae;s__unidentified_Erysipelotrichaceae	0.8859051564265087
ASV_13712	d__Bacteria;p__Bacteroidetes;c__Bacteroidia;o__Bacteroidales;f__unidentified_Bacteroidales;g__unidentified_Bacteroidales;s__unidentified_Bacteroidales	0.9886306096816562
ASV_16341	d__Bacteria;p__Firmicutes;c__Clostridia;o__Clostridiales;f__Lachnospiraceae;g__Blautia;s__unidentified_Blautia	0.7980318283354684
ASV_3190	d__Bacteria;p__Bacteroidetes;c__Bacteroidia;o__Bacteroidales;f__S24-7;g__unidentified_S24-7;s__unidentified_S24-7	0.9999549804565844
ASV_7747	d__Bacteria;p__Firmicutes;c__Clostridia;o__Clostridiales;f__unidentified_Clostridiales;g__unidentified_Clostridiales;s__unidentified_Clostridiales	0.752878849292891
ASV_15052	d__Bacteria;p__Firmicutes;c__Clostridia;o__Clostridiales;f__Lachnospiraceae;g__unclassified_Lachnospiraceae;s__unclassified_Lachnospiraceae	0.8468673097136761
ASV_22778	d__Bacteria;p__Firmicutes;c__Clostridia;o__Clostridiales;f__unclassified_Clostridiales;g__unclassified_Clostridiales;s__unclassified_Clostridiales	0.9999990619569072
ASV_15375	d__Bacteria;p__Firmicutes;c__Clostridia;o__Clostridiales;f__Ruminococcaceae;g__Oscillospira;s__unidentified_Oscillospira	0.999947021277692
ASV_10523	d__Bacteria;p__Firmicutes;c__Clostridia;o__Clostridiales;f__Ruminococcaceae;g__unidentified_Ruminococcaceae;s__unidentified_Ruminococcaceae	0.9988652565698763
ASV_24785	d__Bacteria;p__Firmicutes;c__Clostridia;o__Clostridiales;f__unidentified_Clostridiales;g__unidentified_Clostridiales;s__unidentified_Clostridiales	0.9977602756826824
ASV_12884	d__Bacteria;p__Firmicutes;c__Clostridia;o__Clostridiales;f__Ruminococcaceae;g__Oscillospira;s__unidentified_Oscillospira	0.9966172306634686
ASV_9268	d__Bacteria;p__Proteobacteria;c__Alphaproteobacteria;o__Rhizobiales;f__Bradyrhizobiaceae;g__Bosea;s__Bosea_genosp.	0.9779027146811138
ASV_16447	d__Bacteria;p__Bacteroidetes;c__Bacteroidia;o__Bacteroidales;f__S24-7;g__unidentified_S24-7;s__unidentified_S24-7	0.9999999210661801
ASV_9810	d__Bacteria;p__Actinobacteria;c__Coriobacteriia;o__Coriobacteriales;f__Coriobacteriaceae;g__Adlercreutzia;s__unidentified_Adlercreutzia	0.9947352858877141
ASV_22226	d__Bacteria;p__Firmicutes;c__Clostridia;o__Clostridiales;f__unidentified_Clostridiales;g__unidentified_Clostridiales;s__unidentified_Clostridiales	0.9999156680046793
ASV_10601	d__Bacteria;p__Firmicutes;c__Clostridia;o__Clostridiales;f__Lachnospiraceae;g__unidentified_Lachnospiraceae;s__unidentified_Lachnospiraceae	0.78494253828075
ASV_17301	d__Bacteria;p__Actinobacteria;c__Acidimicrobiia;o__Acidimicrobiales;f__EB1017;g__unidentified_EB1017;s__unidentified_EB1017	0.9999982259594835
ASV_22033	d__Bacteria;p__Chloroflexi;c__Ellin6529;o__unidentified_Ellin6529;f__unidentified_Ellin6529;g__unidentified_Ellin6529;s__unidentified_Ellin6529	0.9999999994406039
ASV_15351	d__Bacteria;p__Firmicutes;c__Bacilli;o__Lactobacillales;f__Streptococcaceae;g__Lactococcus;s__unidentified_Lactococcus	0.9999736914070781
ASV_19411	d__Bacteria;p__Tenericutes;c__Mollicutes;o__RF39;f__unidentified_RF39;g__unidentified_RF39;s__unidentified_RF39	0.9999987568030573
ASV_10013	d__Bacteria;p__Actinobacteria;c__Actinobacteria;o__Actinomycetales;f__Microbacteriaceae;g__Leucobacter;s__unidentified_Leucobacter	0.970245794432033
ASV_7274	d__Bacteria;p__Firmicutes;c__Clostridia;o__Clostridiales;f__Ruminococcaceae;g__unidentified_Ruminococcaceae;s__unidentified_Ruminococcaceae	0.9961947133503695
ASV_18287	d__Bacteria;p__Firmicutes;c__Clostridia;o__Clostridiales;f__Ruminococcaceae;g__Faecalibacterium;s__Faecalibacterium_prausnitzii	0.9986125576902789
ASV_23883	d__Bacteria;p__Proteobacteria;c__Gammaproteobacteria;o__Enterobacteriales;f__Enterobacteriaceae;g__unclassified_Enterobacteriaceae;s__unclassified_Enterobacteriaceae	0.9999999517434334
ASV_11836	d__Bacteria;p__Firmicutes;c__Clostridia;o__Clostridiales;f__Ruminococcaceae;g__unidentified_Ruminococcaceae;s__unidentified_Ruminococcaceae	0.9994691823494002
ASV_2497	d__Bacteria;p__Firmicutes;c__Clostridia;o__Clostridiales;f__Ruminococcaceae;g__unidentified_Ruminococcaceae;s__unidentified_Ruminococcaceae	0.9937890354456846
ASV_13346	d__Bacteria;p__Firmicutes;c__Clostridia;o__Clostridiales;f__Clostridiaceae;g__Proteiniclasticum;s__unidentified_Proteiniclasticum	0.9999984412100033
ASV_13352	d__Bacteria;p__Proteobacteria;c__Alphaproteobacteria;o__Sphingomonadales;f__Sphingomonadaceae;g__Kaistobacter;s__unidentified_Kaistobacter	0.9992439722017539
ASV_19145	d__Bacteria;p__Proteobacteria;c__Alphaproteobacteria;o__Rhizobiales;f__Hyphomicrobiaceae;g__Rhodoplanes;s__unidentified_Rhodoplanes	0.9997704859475826
ASV_13801	d__Bacteria;p__Actinobacteria;c__Actinobacteria;o__Actinomycetales;f__Streptomycetaceae;g__Streptomyces;s__Streptomyces_lanatus	0.9088290723141685
ASV_11761	d__Bacteria;p__Gemmatimonadetes;c__Gemmatimonadetes;o__Ellin5290;f__unidentified_Ellin5290;g__unidentified_Ellin5290;s__unidentified_Ellin5290	0.9997137048228962
ASV_26051	d__Bacteria;p__Bacteroidetes;c__Bacteroidia;o__Bacteroidales;f__Rikenellaceae;g__unidentified_Rikenellaceae;s__unidentified_Rikenellaceae	0.8202032412761855
ASV_20793	d__Bacteria;p__Proteobacteria;c__Alphaproteobacteria;o__Rhodospirillales;f__Rhodospirillaceae;g__Azospirillum;s__unclassified_Azospirillum	0.9998528854929272
ASV_10524	d__Bacteria;p__Bacteroidetes;c__Bacteroidia;o__Bacteroidales;f__Bacteroidaceae;g__Bacteroides;s__Bacteroides_acidifaciens	0.993587764969015
ASV_18869	d__Bacteria;p__Proteobacteria;c__Gammaproteobacteria;o__Pseudomonadales;f__Moraxellaceae;g__Acinetobacter;s__Acinetobacter_johnsonii	0.7165087380548608
ASV_2705	d__Bacteria;p__Firmicutes;c__Erysipelotrichi;o__Erysipelotrichales;f__Erysipelotrichaceae;g__unidentified_Erysipelotrichaceae;s__unidentified_Erysipelotrichaceae	0.9778832662842049
ASV_26091	d__Bacteria;p__Firmicutes;c__Clostridia;o__Clostridiales;f__Ruminococcaceae;g__unidentified_Ruminococcaceae;s__unidentified_Ruminococcaceae	0.8855849635425637
ASV_11467	d__Bacteria;p__Firmicutes;c__Clostridia;o__Clostridiales;f__unidentified_Clostridiales;g__unidentified_Clostridiales;s__unidentified_Clostridiales	0.8611184260705598
ASV_10632	d__Bacteria;p__Firmicutes;c__Clostridia;o__Clostridiales;f__unidentified_Clostridiales;g__unidentified_Clostridiales;s__unidentified_Clostridiales	0.9998061722366971
ASV_13149	d__Bacteria;p__Proteobacteria;c__Gammaproteobacteria;o__Xanthomonadales;f__Xanthomonadaceae;g__unidentified_Xanthomonadaceae;s__unidentified_Xanthomonadaceae	0.9799818649473149
ASV_19004	d__Bacteria;p__Proteobacteria;c__Alphaproteobacteria;o__Ellin329;f__unidentified_Ellin329;g__unidentified_Ellin329;s__unidentified_Ellin329	0.9999983462200849
ASV_5126	d__Bacteria;p__Proteobacteria;c__Betaproteobacteria;o__Burkholderiales;f__Alcaligenaceae;g__Castellaniella;s__Castellaniella_defragrans	0.7336859027108037
ASV_16411	d__Bacteria;p__Spirochaetes;c__Spirochaetes;o__Spirochaetales;f__Spirochaetaceae;g__Treponema;s__unidentified_Treponema	0.9999997403952872
ASV_24873	d__Bacteria;p__Firmicutes;c__Bacilli;o__Lactobacillales;f__Lactobacillaceae;g__Lactobacillus;s__unidentified_Lactobacillus	0.9941489169549954
ASV_13253	d__Bacteria;p__Firmicutes;c__Bacilli;o__Lactobacillales;f__Lactobacillaceae;g__Lactobacillus;s__unidentified_Lactobacillus	0.9973979089831126
ASV_15732	d__Bacteria;p__Firmicutes;c__Clostridia;o__Clostridiales;f__Ruminococcaceae;g__Ruminococcus;s__Ruminococcus_flavefaciens	0.8377582925334413
ASV_3105	d__Bacteria;p__Firmicutes;c__Clostridia;o__Clostridiales;f__[Mogibacteriaceae];g__unidentified_[Mogibacteriaceae];s__unidentified_[Mogibacteriaceae]	0.9999898083717739
ASV_15070	d__Bacteria;p__Firmicutes;c__Clostridia;o__Clostridiales;f__Clostridiaceae;g__Proteiniclasticum;s__unidentified_Proteiniclasticum	0.9998708821335365
ASV_11712	d__Bacteria;p__Firmicutes;c__Bacilli;o__Lactobacillales;f__Lactobacillaceae;g__Lactobacillus;s__unidentified_Lactobacillus	0.9150703829659627
ASV_4079	d__Bacteria;p__Bacteroidetes;c__Bacteroidia;o__Bacteroidales;f__S24-7;g__unidentified_S24-7;s__unidentified_S24-7	0.9999646587352301
ASV_15118	d__Bacteria;p__Firmicutes;c__Clostridia;o__Clostridiales;f__Lachnospiraceae;g__Epulopiscium;s__unidentified_Epulopiscium	0.9999994903441396
ASV_15748	d__Bacteria;p__Bacteroidetes;c__Sphingobacteriia;o__Sphingobacteriales;f__Sphingobacteriaceae;g__unidentified_Sphingobacteriaceae;s__unidentified_Sphingobacteriaceae	0.893935534409971
ASV_21777	d__Bacteria;p__Proteobacteria;c__Alphaproteobacteria;o__Rhizobiales;f__Hyphomicrobiaceae;g__Devosia;s__unidentified_Devosia	0.99972726388917
ASV_12860	d__Bacteria;p__Proteobacteria;c__Alphaproteobacteria;o__Rhizobiales;f__Hyphomicrobiaceae;g__Rhodoplanes;s__unidentified_Rhodoplanes	0.9996244271599879
ASV_15220	d__Bacteria;p__Gemmatimonadetes;c__Gemm-1;o__unidentified_Gemm-1;f__unidentified_Gemm-1;g__unidentified_Gemm-1;s__unidentified_Gemm-1	0.9999999999747331
ASV_16347	d__Bacteria;p__Firmicutes;c__Clostridia;o__Clostridiales;f__Ruminococcaceae;g__Ruminococcus;s__Ruminococcus_bromii	0.9999532853336439
ASV_15670	d__Bacteria;p__Firmicutes;c__Clostridia;o__Clostridiales;f__Ruminococcaceae;g__Oscillospira;s__unidentified_Oscillospira	0.9989518104000122
ASV_24260	d__Bacteria;p__Firmicutes;c__Clostridia;o__Clostridiales;f__Lachnospiraceae;g__unclassified_Lachnospiraceae;s__unclassified_Lachnospiraceae	0.9504865202017843
ASV_8348	d__Bacteria;p__Actinobacteria;c__Actinobacteria;o__Actinomycetales;f__Nocardioidaceae;g__unclassified_Nocardioidaceae;s__unclassified_Nocardioidaceae	0.9999997397740343
ASV_10878	d__Bacteria;p__Proteobacteria;c__Deltaproteobacteria;o__Myxococcales;f__unidentified_Myxococcales;g__unidentified_Myxococcales;s__unidentified_Myxococcales	0.9873199791403505
ASV_11949	d__Bacteria;p__Bacteroidetes;c__Bacteroidia;o__Bacteroidales;f__S24-7;g__unidentified_S24-7;s__unidentified_S24-7	0.9999991890615993
ASV_10615	d__Bacteria;p__Proteobacteria;c__Gammaproteobacteria;o__Pseudomonadales;f__Moraxellaceae;g__Enhydrobacter;s__unclassified_Enhydrobacter	0.9999977302453971
ASV_2557	d__Bacteria;p__Firmicutes;c__Clostridia;o__Clostridiales;f__Lachnospiraceae;g__unclassified_Lachnospiraceae;s__unclassified_Lachnospiraceae	0.9366123580735681
ASV_20585	d__Bacteria;p__Firmicutes;c__Clostridia;o__Clostridiales;f__Ruminococcaceae;g__Oscillospira;s__unidentified_Oscillospira	0.99771665668077
ASV_12034	d__Bacteria;p__Firmicutes;c__Clostridia;o__Clostridiales;f__Ruminococcaceae;g__unidentified_Ruminococcaceae;s__unidentified_Ruminococcaceae	0.987535285471667
ASV_337	d__Bacteria;p__TM7;c__TM7-1;o__unidentified_TM7-1;f__unidentified_TM7-1;g__unidentified_TM7-1;s__unidentified_TM7-1	0.99999912799019
ASV_20346	d__Bacteria;p__Actinobacteria;c__Actinobacteria;o__Actinomycetales;f__unidentified_Actinomycetales;g__unidentified_Actinomycetales;s__unidentified_Actinomycetales	0.995259378435912
ASV_12558	d__Bacteria;p__Proteobacteria;c__Alphaproteobacteria;o__Sphingomonadales;f__Sphingomonadaceae;g__Kaistobacter;s__unidentified_Kaistobacter	0.9931257207020011
ASV_18683	d__Bacteria;p__Actinobacteria;c__Actinobacteria;o__Actinomycetales;f__Mycobacteriaceae;g__Mycobacterium;s__unidentified_Mycobacterium	0.9733749316442376
ASV_4549	d__Bacteria;p__Bacteroidetes;c__Bacteroidia;o__Bacteroidales;f__S24-7;g__unidentified_S24-7;s__unidentified_S24-7	0.9999409696475492
ASV_5905	d__Bacteria;p__Firmicutes;c__Clostridia;o__Clostridiales;f__Ruminococcaceae;g__unidentified_Ruminococcaceae;s__unidentified_Ruminococcaceae	0.9776036572427695
ASV_17073	d__Bacteria;p__Firmicutes;c__Clostridia;o__Clostridiales;f__Peptococcaceae;g__rc4-4;s__unidentified_rc4-4	0.9787459779735002
ASV_10814	d__Bacteria;p__Acidobacteria;c__Acidobacteriia;o__Acidobacteriales;f__Acidobacteriaceae;g__unidentified_Acidobacteriaceae;s__unidentified_Acidobacteriaceae	0.9417054090803422
ASV_16843	d__Bacteria;p__Proteobacteria;c__Betaproteobacteria;o__Burkholderiales;f__Comamonadaceae;g__Aquabacterium;s__unidentified_Aquabacterium	0.9944298764325316
ASV_13119	d__Bacteria;p__Actinobacteria;c__Actinobacteria;o__Micrococcales;f__unidentified_Micrococcales;g__unidentified_Micrococcales;s__unidentified_Micrococcales	0.9999999996010729
ASV_15741	d__Bacteria;p__Gemmatimonadetes;c__Gemmatimonadetes;o__Ellin5290;f__unidentified_Ellin5290;g__unidentified_Ellin5290;s__unidentified_Ellin5290	0.9999287459789956
ASV_4956	d__Bacteria;p__Firmicutes;c__Clostridia;o__Clostridiales;f__Lachnospiraceae;g__unidentified_Lachnospiraceae;s__unidentified_Lachnospiraceae	0.9310684063358403
ASV_13877	d__Bacteria;p__Firmicutes;c__Clostridia;o__Clostridiales;f__unidentified_Clostridiales;g__unidentified_Clostridiales;s__unidentified_Clostridiales	0.8968600920937785
ASV_16710	d__Bacteria;p__Firmicutes;c__Clostridia;o__Clostridiales;f__Clostridiaceae;g__Clostridium;s__unidentified_Clostridium	0.9228353430073416
ASV_1394	d__Bacteria;p__Spirochaetes;c__Spirochaetes;o__Spirochaetales;f__Spirochaetaceae;g__Treponema;s__unidentified_Treponema	0.9999997583813077
ASV_20116	d__Bacteria;p__Firmicutes;c__Clostridia;o__Clostridiales;f__Lachnospiraceae;g__Coprococcus;s__unidentified_Coprococcus	0.9873878329848514
ASV_12527	d__Bacteria;p__Firmicutes;c__Clostridia;o__Clostridiales;f__Ruminococcaceae;g__unidentified_Ruminococcaceae;s__unidentified_Ruminococcaceae	0.9303683940417963
ASV_22209	d__Bacteria;p__Proteobacteria;c__Alphaproteobacteria;o__Rhodospirillales;f__Rhodospirillaceae;g__Reyranella;s__Reyranella_massiliensis	0.9871137081133662
ASV_24249	d__Bacteria;p__Gemmatimonadetes;c__Gemmatimonadetes;o__Ellin5290;f__unidentified_Ellin5290;g__unidentified_Ellin5290;s__unidentified_Ellin5290	0.9999487163468718
ASV_4793	d__Bacteria;p__Firmicutes;c__Clostridia;o__Clostridiales;f__unidentified_Clostridiales;g__unidentified_Clostridiales;s__unidentified_Clostridiales	0.9964415974245461
ASV_2374	d__Bacteria;p__Actinobacteria;c__Actinobacteria;o__Actinomycetales;f__Micromonosporaceae;g__unclassified_Micromonosporaceae;s__unclassified_Micromonosporaceae	0.9997149754134721
ASV_15530	d__Bacteria;p__Firmicutes;c__Clostridia;o__Clostridiales;f__Lachnospiraceae;g__unidentified_Lachnospiraceae;s__unidentified_Lachnospiraceae	0.9741526971490703
ASV_18800	d__Bacteria;p__Proteobacteria;c__Alphaproteobacteria;o__Rhizobiales;f__Brucellaceae;g__Ochrobactrum;s__unidentified_Ochrobactrum	0.9146204140929647
ASV_4161	d__Bacteria;p__Firmicutes;c__Clostridia;o__Clostridiales;f__Lachnospiraceae;g__unidentified_Lachnospiraceae;s__unidentified_Lachnospiraceae	0.9357571872883567
ASV_10184	d__Bacteria;p__Firmicutes;c__Clostridia;o__Clostridiales;f__Ruminococcaceae;g__Ruminococcus;s__unidentified_Ruminococcus	0.9197571017316363
ASV_23303	d__Bacteria;p__Firmicutes;c__Clostridia;o__Clostridiales;f__Veillonellaceae;g__unidentified_Veillonellaceae;s__unidentified_Veillonellaceae	0.952817883913628
ASV_7077	d__Bacteria;p__Firmicutes;c__Clostridia;o__Clostridiales;f__Lachnospiraceae;g__unidentified_Lachnospiraceae;s__unidentified_Lachnospiraceae	0.8707223020949635
ASV_20324	d__Bacteria;p__Actinobacteria;c__Actinobacteria;o__Actinomycetales;f__unclassified_Actinomycetales;g__unclassified_Actinomycetales;s__unclassified_Actinomycetales	0.7205402346020394
ASV_5067	d__Bacteria;p__Proteobacteria;c__Alphaproteobacteria;o__Sphingomonadales;f__Sphingomonadaceae;g__Kaistobacter;s__unidentified_Kaistobacter	0.9986242370514634
ASV_11361	d__Bacteria;p__Firmicutes;c__Clostridia;o__Clostridiales;f__Ruminococcaceae;g__unidentified_Ruminococcaceae;s__unidentified_Ruminococcaceae	0.981789630209846
ASV_21138	d__Bacteria;p__Proteobacteria;c__Gammaproteobacteria;o__Xanthomonadales;f__Xanthomonadaceae;g__Rhodanobacter;s__unidentified_Rhodanobacter	0.7462908077079503
ASV_14206	d__Bacteria;p__Tenericutes;c__Mollicutes;o__RF39;f__unidentified_RF39;g__unidentified_RF39;s__unidentified_RF39	0.9999982608357871
ASV_13151	d__Bacteria;p__Firmicutes;c__Clostridia;o__Clostridiales;f__Ruminococcaceae;g__unidentified_Ruminococcaceae;s__unidentified_Ruminococcaceae	0.906343457984401
ASV_23069	d__Bacteria;p__Gemmatimonadetes;c__Gemmatimonadetes;o__N1423WL;f__unidentified_N1423WL;g__unidentified_N1423WL;s__unidentified_N1423WL	0.9999999969092528
ASV_5765	d__Bacteria;p__Bacteroidetes;c__Bacteroidia;o__Bacteroidales;f__S24-7;g__unidentified_S24-7;s__unidentified_S24-7	0.9999998281451644
ASV_17197	d__Bacteria;p__Firmicutes;c__Clostridia;o__Clostridiales;f__Ruminococcaceae;g__unidentified_Ruminococcaceae;s__unidentified_Ruminococcaceae	0.9651655688748859
ASV_1434	d__Bacteria;p__Actinobacteria;c__Coriobacteriia;o__Coriobacteriales;f__Coriobacteriaceae;g__Adlercreutzia;s__unidentified_Adlercreutzia	0.9899121253507003
ASV_5410	d__Bacteria;p__Firmicutes;c__Clostridia;o__Clostridiales;f__Ruminococcaceae;g__unidentified_Ruminococcaceae;s__unidentified_Ruminococcaceae	0.9320250958075023
ASV_11876	d__Bacteria;p__Actinobacteria;c__Actinobacteria;o__Actinomycetales;f__Micromonosporaceae;g__Pilimelia;s__unidentified_Pilimelia	0.9592769189677974
ASV_17992	d__Bacteria;p__Actinobacteria;c__Thermoleophilia;o__Solirubrobacterales;f__unidentified_Solirubrobacterales;g__unidentified_Solirubrobacterales;s__unidentified_Solirubrobacterales	0.9999999987479384
ASV_3627	d__Bacteria;p__Bacteroidetes;c__Bacteroidia;o__Bacteroidales;f__Porphyromonadaceae;g__Paludibacter;s__unidentified_Paludibacter	0.9707916086644331
ASV_4529	d__Bacteria;p__Acidobacteria;c__Solibacteres;o__Solibacterales;f__Solibacteraceae;g__unidentified_Solibacteraceae;s__unidentified_Solibacteraceae	0.9181826760319016
ASV_322	d__Bacteria;p__Firmicutes;c__Clostridia;o__Clostridiales;f__Lachnospiraceae;g__unidentified_Lachnospiraceae;s__unidentified_Lachnospiraceae	0.781742158027302
ASV_11829	d__Bacteria;p__Bacteroidetes;c__Bacteroidia;o__Bacteroidales;f__Bacteroidaceae;g__Bacteroides;s__unidentified_Bacteroides	0.9998125100953246
ASV_23827	d__Bacteria;p__Firmicutes;c__Clostridia;o__Clostridiales;f__Ruminococcaceae;g__unidentified_Ruminococcaceae;s__unidentified_Ruminococcaceae	0.9880908773834608
ASV_12297	d__Bacteria;p__Actinobacteria;c__Coriobacteriia;o__Coriobacteriales;f__Coriobacteriaceae;g__Adlercreutzia;s__unidentified_Adlercreutzia	0.9990744868961552
ASV_18243	d__Bacteria;p__Tenericutes;c__Mollicutes;o__RF39;f__unidentified_RF39;g__unidentified_RF39;s__unidentified_RF39	0.9999999959707964
ASV_15426	d__Bacteria;p__Firmicutes;c__Clostridia;o__Clostridiales;f__Clostridiaceae;g__unidentified_Clostridiaceae;s__unidentified_Clostridiaceae	0.846024648706901
ASV_10798	d__Bacteria;p__Firmicutes;c__Clostridia;o__Clostridiales;f__Ruminococcaceae;g__unidentified_Ruminococcaceae;s__unidentified_Ruminococcaceae	0.9969013290670394
ASV_5807	d__Bacteria;p__Firmicutes;c__Clostridia;o__Clostridiales;f__Ruminococcaceae;g__Ruminococcus;s__unidentified_Ruminococcus	0.9999455775402311
ASV_13022	d__Bacteria;p__Gemmatimonadetes;c__Gemmatimonadetes;o__Ellin5290;f__unidentified_Ellin5290;g__unidentified_Ellin5290;s__unidentified_Ellin5290	0.9998459715297493
ASV_24917	d__Bacteria;p__Acidobacteria;c__Acidobacteriia;o__Acidobacteriales;f__Acidobacteriaceae;g__Terriglobus;s__unidentified_Terriglobus	0.9999147547173501
ASV_26307	d__Bacteria;p__Firmicutes;c__Clostridia;o__Clostridiales;f__unidentified_Clostridiales;g__unidentified_Clostridiales;s__unidentified_Clostridiales	0.8574831136226154
ASV_19653	d__Bacteria;p__Firmicutes;c__Clostridia;o__Clostridiales;f__Ruminococcaceae;g__unidentified_Ruminococcaceae;s__unidentified_Ruminococcaceae	0.9628555252285999
ASV_15165	d__Bacteria;p__Acidobacteria;c__Solibacteres;o__Solibacterales;f__Solibacteraceae;g__Candidatus_Solibacter;s__unidentified_Candidatus_Solibacter	0.9999772408513229
ASV_24581	d__Bacteria;p__Firmicutes;c__Clostridia;o__Clostridiales;f__Lachnospiraceae;g__unidentified_Lachnospiraceae;s__unidentified_Lachnospiraceae	0.9276214817760808
ASV_901	d__Bacteria;p__Firmicutes;c__Clostridia;o__Clostridiales;f__Ruminococcaceae;g__unidentified_Ruminococcaceae;s__unidentified_Ruminococcaceae	0.7866025736275588
ASV_12241	d__Bacteria;p__Firmicutes;c__Clostridia;o__Clostridiales;f__unidentified_Clostridiales;g__unidentified_Clostridiales;s__unidentified_Clostridiales	0.9998983078146869
ASV_16934	d__Bacteria;p__Proteobacteria;c__Gammaproteobacteria;o__Xanthomonadales;f__Xanthomonadaceae;g__Dyella;s__unclassified_Dyella	0.8519274159074756
ASV_11523	d__Bacteria;p__Proteobacteria;c__Gammaproteobacteria;o__Pseudomonadales;f__Moraxellaceae;g__Acinetobacter;s__unclassified_Acinetobacter	0.9999906143044369
ASV_161	d__Bacteria;p__Gemmatimonadetes;c__Gemmatimonadetes;o__Ellin5290;f__unidentified_Ellin5290;g__unidentified_Ellin5290;s__unidentified_Ellin5290	0.957120202615655
ASV_4360	d__Bacteria;p__Bacteroidetes;c__Bacteroidia;o__Bacteroidales;f__S24-7;g__unidentified_S24-7;s__unidentified_S24-7	0.8279847171305191
ASV_23528	d__Bacteria;p__Actinobacteria;c__Actinobacteria;o__Actinomycetales;f__Microbacteriaceae;g__Salinibacterium;s__unclassified_Salinibacterium	0.9098286225092882
ASV_22753	d__Bacteria;p__Firmicutes;c__Clostridia;o__Clostridiales;f__Ruminococcaceae;g__Oscillospira;s__unidentified_Oscillospira	0.9971583488088357
ASV_19176	d__Bacteria;p__Bacteroidetes;c__Bacteroidia;o__Bacteroidales;f__S24-7;g__unidentified_S24-7;s__unidentified_S24-7	0.9999952222907658
ASV_5324	d__Bacteria;p__Firmicutes;c__Clostridia;o__Clostridiales;f__unidentified_Clostridiales;g__unidentified_Clostridiales;s__unidentified_Clostridiales	0.8899570026314889
ASV_4005	d__Bacteria;p__Firmicutes;c__Clostridia;o__Clostridiales;f__Lachnospiraceae;g__unidentified_Lachnospiraceae;s__unidentified_Lachnospiraceae	0.7598482784387273
ASV_18961	d__Bacteria;p__Proteobacteria;c__Alphaproteobacteria;o__Rhizobiales;f__unclassified_Rhizobiales;g__unclassified_Rhizobiales;s__unclassified_Rhizobiales	0.9998328996143386
ASV_6841	d__Bacteria;p__Bacteroidetes;c__Bacteroidia;o__Bacteroidales;f__unidentified_Bacteroidales;g__unidentified_Bacteroidales;s__unidentified_Bacteroidales	0.9999496181060967
ASV_475	d__Bacteria;p__Bacteroidetes;c__Sphingobacteriia;o__Sphingobacteriales;f__Sphingobacteriaceae;g__unidentified_Sphingobacteriaceae;s__unidentified_Sphingobacteriaceae	0.950490764424778
ASV_21217	d__Bacteria;p__Actinobacteria;c__Actinobacteria;o__Actinomycetales;f__Geodermatophilaceae;g__Geodermatophilus;s__unidentified_Geodermatophilus	0.9622502679071657
ASV_7715	d__Bacteria;p__Firmicutes;c__Clostridia;o__Clostridiales;f__Lachnospiraceae;g__Blautia;s__unidentified_Blautia	0.9168908940984253
ASV_13039	d__Bacteria;p__Actinobacteria;c__Actinobacteria;o__Actinomycetales;f__Micromonosporaceae;g__unclassified_Micromonosporaceae;s__unclassified_Micromonosporaceae	0.9999487323637983
ASV_7140	d__Bacteria;p__Firmicutes;c__Clostridia;o__Clostridiales;f__Lachnospiraceae;g__Roseburia;s__unclassified_Roseburia	0.9926581157474297
ASV_16210	d__Bacteria;p__Bacteroidetes;c__Bacteroidia;o__Bacteroidales;f__S24-7;g__unidentified_S24-7;s__unidentified_S24-7	0.9999999504319431
ASV_14095	d__Bacteria;p__Bacteroidetes;c__Bacteroidia;o__Bacteroidales;f__RF16;g__unidentified_RF16;s__unidentified_RF16	0.9999816982275053
ASV_26146	d__Bacteria;p__Gemmatimonadetes;c__Gemmatimonadetes;o__N1423WL;f__unidentified_N1423WL;g__unidentified_N1423WL;s__unidentified_N1423WL	0.9999999965720292
ASV_13605	d__Bacteria;p__Firmicutes;c__Clostridia;o__Clostridiales;f__unidentified_Clostridiales;g__unidentified_Clostridiales;s__unidentified_Clostridiales	0.7068787660297859
ASV_21650	d__Bacteria;p__Firmicutes;c__Clostridia;o__Clostridiales;f__Ruminococcaceae;g__unidentified_Ruminococcaceae;s__unidentified_Ruminococcaceae	0.9478856931851449
ASV_25524	d__Bacteria;p__Firmicutes;c__Clostridia;o__Clostridiales;f__unidentified_Clostridiales;g__unidentified_Clostridiales;s__unidentified_Clostridiales	0.9012065166248464
ASV_18247	d__Bacteria;p__Tenericutes;c__Mollicutes;o__RF39;f__unidentified_RF39;g__unidentified_RF39;s__unidentified_RF39	0.9999999923154803
ASV_20965	d__Bacteria;p__Firmicutes;c__Bacilli;o__Lactobacillales;f__Streptococcaceae;g__Streptococcus;s__unidentified_Streptococcus	0.9999795443227208
ASV_13728	d__Bacteria;p__Firmicutes;c__Clostridia;o__Clostridiales;f__Ruminococcaceae;g__unidentified_Ruminococcaceae;s__unidentified_Ruminococcaceae	0.9956654223208382
ASV_16916	d__Bacteria;p__Proteobacteria;c__Betaproteobacteria;o__Burkholderiales;f__Burkholderiaceae;g__Burkholderia;s__unidentified_Burkholderia	0.890359051793152
ASV_5462	d__Bacteria;p__Proteobacteria;c__Betaproteobacteria;o__SC-I-84;f__unidentified_SC-I-84;g__unidentified_SC-I-84;s__unidentified_SC-I-84	0.999992958875003
ASV_13776	d__Bacteria;p__Proteobacteria;c__Alphaproteobacteria;o__Sphingomonadales;f__Sphingomonadaceae;g__Sphingomonas;s__unclassified_Sphingomonas	0.9807180993533746
ASV_23317	d__Bacteria;p__Firmicutes;c__Clostridia;o__Clostridiales;f__Ruminococcaceae;g__unidentified_Ruminococcaceae;s__unidentified_Ruminococcaceae	0.7173295961343684
ASV_3950	d__Bacteria;p__Firmicutes;c__Clostridia;o__Clostridiales;f__unidentified_Clostridiales;g__unidentified_Clostridiales;s__unidentified_Clostridiales	0.9848556558646019
ASV_24853	d__Bacteria;p__Bacteroidetes;c__Bacteroidia;o__Bacteroidales;f__Rikenellaceae;g__unclassified_Rikenellaceae;s__unclassified_Rikenellaceae	0.999999998700887
ASV_17913	d__Bacteria;p__Firmicutes;c__Bacilli;o__Bacillales;f__Bacillaceae;g__Bacillus;s__unclassified_Bacillus	0.9222445305814984
ASV_10716	d__Bacteria;p__Firmicutes;c__Clostridia;o__Clostridiales;f__unclassified_Clostridiales;g__unclassified_Clostridiales;s__unclassified_Clostridiales	0.9999845452592011
ASV_16601	d__Bacteria;p__Proteobacteria;c__Alphaproteobacteria;o__Rhodospirillales;f__Rhodospirillaceae;g__Reyranella;s__Reyranella_massiliensis	0.9848647683479895
ASV_26190	d__Bacteria;p__Firmicutes;c__Clostridia;o__Clostridiales;f__Ruminococcaceae;g__unidentified_Ruminococcaceae;s__unidentified_Ruminococcaceae	0.9791400626381648
ASV_12163	d__Bacteria;p__Firmicutes;c__Clostridia;o__Clostridiales;f__unidentified_Clostridiales;g__unidentified_Clostridiales;s__unidentified_Clostridiales	0.9637811860219947
ASV_23550	d__Bacteria;p__Firmicutes;c__Clostridia;o__Clostridiales;f__Ruminococcaceae;g__Oscillospira;s__unidentified_Oscillospira	0.9989346183388279
ASV_10670	d__Bacteria;p__Bacteroidetes;c__Bacteroidia;o__Bacteroidales;f__[Paraprevotellaceae];g__YRC22;s__unidentified_YRC22	0.9999999152512977
ASV_14599	d__Bacteria;p__Firmicutes;c__Clostridia;o__Clostridiales;f__Lachnospiraceae;g__unidentified_Lachnospiraceae;s__unidentified_Lachnospiraceae	0.9419672187744411
ASV_17918	d__Bacteria;p__Firmicutes;c__Clostridia;o__Clostridiales;f__Ruminococcaceae;g__unidentified_Ruminococcaceae;s__unidentified_Ruminococcaceae	0.9707877153528949
ASV_21525	d__Bacteria;p__Firmicutes;c__Bacilli;o__Bacillales;f__unclassified_Bacillales;g__unclassified_Bacillales;s__unclassified_Bacillales	0.999453999698848
ASV_23829	d__Bacteria;p__Actinobacteria;c__Thermoleophilia;o__Gaiellales;f__Gaiellaceae;g__unidentified_Gaiellaceae;s__unidentified_Gaiellaceae	0.9999893608499321
ASV_22648	d__Bacteria;p__TM7;c__TM7-1;o__unidentified_TM7-1;f__unidentified_TM7-1;g__unidentified_TM7-1;s__unidentified_TM7-1	0.9999998796895754
ASV_20647	d__Bacteria;p__Chloroflexi;c__Ellin6529;o__unidentified_Ellin6529;f__unidentified_Ellin6529;g__unidentified_Ellin6529;s__unidentified_Ellin6529	0.9999999995946212
ASV_23044	d__Bacteria;p__Firmicutes;c__Bacilli;o__Lactobacillales;f__Lactobacillaceae;g__Lactobacillus;s__unclassified_Lactobacillus	0.9770267670150469
ASV_23442	d__Bacteria;p__Bacteroidetes;c__Bacteroidia;o__Bacteroidales;f__S24-7;g__unidentified_S24-7;s__unidentified_S24-7	0.9999999504582048
ASV_11775	d__Bacteria;p__Firmicutes;c__Clostridia;o__Clostridiales;f__Lachnospiraceae;g__unidentified_Lachnospiraceae;s__unidentified_Lachnospiraceae	0.8319896645142694
ASV_11514	d__Bacteria;p__Chloroflexi;c__Thermomicrobia;o__unidentified_Thermomicrobia;f__unidentified_Thermomicrobia;g__unidentified_Thermomicrobia;s__unidentified_Thermomicrobia	0.999660114629855
ASV_24741	d__Bacteria;p__Proteobacteria;c__Alphaproteobacteria;o__Rhizobiales;f__Rhizobiaceae;g__unclassified_Rhizobiaceae;s__unclassified_Rhizobiaceae	0.9925196156754079
ASV_11581	d__Bacteria;p__Firmicutes;c__Clostridia;o__Clostridiales;f__unclassified_Clostridiales;g__unclassified_Clostridiales;s__unclassified_Clostridiales	0.9995492576599152
ASV_25541	d__Bacteria;p__Cyanobacteria;c__4C0d-2;o__YS2;f__unidentified_YS2;g__unidentified_YS2;s__unidentified_YS2	0.9999999999986358
ASV_1732	d__Bacteria;p__Tenericutes;c__Mollicutes;o__RF39;f__unidentified_RF39;g__unidentified_RF39;s__unidentified_RF39	0.9999999063767334
ASV_6633	d__Bacteria;p__Firmicutes;c__Bacilli;o__Lactobacillales;f__Lactobacillaceae;g__Lactobacillus;s__unidentified_Lactobacillus	0.8582030914630391
ASV_6712	d__Bacteria;p__Bacteroidetes;c__Bacteroidia;o__Bacteroidales;f__unidentified_Bacteroidales;g__unidentified_Bacteroidales;s__unidentified_Bacteroidales	0.9912938610780769
ASV_21002	d__Bacteria;p__Firmicutes;c__Clostridia;o__Clostridiales;f__unclassified_Clostridiales;g__unclassified_Clostridiales;s__unclassified_Clostridiales	0.7018519237729769
ASV_9993	d__Bacteria;p__TM7;c__TM7-1;o__unidentified_TM7-1;f__unidentified_TM7-1;g__unidentified_TM7-1;s__unidentified_TM7-1	0.9999843229979788
ASV_15324	d__Bacteria;p__Firmicutes;c__Clostridia;o__Clostridiales;f__Clostridiaceae;g__Clostridium;s__Clostridium_butyricum	0.9612999404402268
ASV_17434	d__Bacteria;p__Chloroflexi;c__Thermomicrobia;o__JG30-KF-CM45;f__unidentified_JG30-KF-CM45;g__unidentified_JG30-KF-CM45;s__unidentified_JG30-KF-CM45	0.9999999849977997
ASV_22849	d__Bacteria;p__Actinobacteria;c__Actinobacteria;o__Actinomycetales;f__Pseudonocardiaceae;g__Pseudonocardia;s__unidentified_Pseudonocardia	0.9975338403069582
ASV_12764	d__Bacteria;p__Firmicutes;c__Clostridia;o__Clostridiales;f__Ruminococcaceae;g__Butyricicoccus;s__Butyricicoccus_pullicaecorum	0.9999992870164914
ASV_5180	d__Bacteria;p__Bacteroidetes;c__Bacteroidia;o__Bacteroidales;f__Prevotellaceae;g__Prevotella;s__unidentified_Prevotella	0.9999973179837282
ASV_20773	d__Bacteria;p__Firmicutes;c__Clostridia;o__Clostridiales;f__Ruminococcaceae;g__Oscillospira;s__unidentified_Oscillospira	0.9998325945068129
ASV_14262	d__Bacteria;p__Firmicutes;c__Clostridia;o__Clostridiales;f__Lachnospiraceae;g__unidentified_Lachnospiraceae;s__unidentified_Lachnospiraceae	0.9290465893122813
ASV_4442	d__Bacteria;p__Firmicutes;c__Clostridia;o__Clostridiales;f__Ruminococcaceae;g__unidentified_Ruminococcaceae;s__unidentified_Ruminococcaceae	0.8499836050248563
ASV_24668	d__Bacteria;p__Firmicutes;c__Clostridia;o__Clostridiales;f__unidentified_Clostridiales;g__unidentified_Clostridiales;s__unidentified_Clostridiales	0.8555607102204007
ASV_6796	d__Bacteria;p__Firmicutes;c__Clostridia;o__Clostridiales;f__Ruminococcaceae;g__unidentified_Ruminococcaceae;s__unidentified_Ruminococcaceae	0.9991003053978743
ASV_939	d__Bacteria;p__Firmicutes;c__Bacilli;o__Lactobacillales;f__Lactobacillaceae;g__Pediococcus;s__unclassified_Pediococcus	0.9982550908274482
ASV_5479	d__Bacteria;p__Firmicutes;c__Clostridia;o__Clostridiales;f__Lachnospiraceae;g__Coprococcus;s__unidentified_Coprococcus	0.8735481623765586
ASV_10166	d__Bacteria;p__Proteobacteria;c__Alphaproteobacteria;o__Rhizobiales;f__Hyphomicrobiaceae;g__Rhodoplanes;s__unidentified_Rhodoplanes	0.9999680524007838
ASV_21991	d__Bacteria;p__Firmicutes;c__Bacilli;o__Lactobacillales;f__Lactobacillaceae;g__Lactobacillus;s__unidentified_Lactobacillus	0.7446690192951848
ASV_23823	d__Bacteria;p__TM7;c__TM7-1;o__unidentified_TM7-1;f__unidentified_TM7-1;g__unidentified_TM7-1;s__unidentified_TM7-1	0.9999871572889162
ASV_11993	d__Bacteria;p__Cyanobacteria;c__Chloroplast;o__Stramenopiles;f__unidentified_Stramenopiles;g__unidentified_Stramenopiles;s__unidentified_Stramenopiles	0.9999999983571684
ASV_2704	d__Bacteria;p__Bacteroidetes;c__Bacteroidia;o__Bacteroidales;f__S24-7;g__unidentified_S24-7;s__unidentified_S24-7	0.9999998798230437
ASV_6646	d__Bacteria;p__Firmicutes;c__Clostridia;o__Clostridiales;f__[Mogibacteriaceae];g__unidentified_[Mogibacteriaceae];s__unidentified_[Mogibacteriaceae]	0.9969584439160675
ASV_20335	d__Bacteria;p__Firmicutes;c__Clostridia;o__Clostridiales;f__Peptococcaceae;g__rc4-4;s__unidentified_rc4-4	0.9999995707949336
ASV_18293	d__Bacteria;p__Firmicutes;c__Bacilli;o__Lactobacillales;f__Lactobacillaceae;g__Lactobacillus;s__unidentified_Lactobacillus	0.9965477626184663
ASV_4178	d__Bacteria;p__Firmicutes;c__Clostridia;o__Clostridiales;f__unidentified_Clostridiales;g__unidentified_Clostridiales;s__unidentified_Clostridiales	0.7336578298481438
ASV_19108	d__Bacteria;p__Actinobacteria;c__Actinobacteria;o__Actinomycetales;f__Streptosporangiaceae;g__unclassified_Streptosporangiaceae;s__unclassified_Streptosporangiaceae	0.9999998190865472
ASV_5082	d__Bacteria;p__Proteobacteria;c__Alphaproteobacteria;o__Rhizobiales;f__Hyphomicrobiaceae;g__unidentified_Hyphomicrobiaceae;s__unidentified_Hyphomicrobiaceae	0.7390354900520466
ASV_1054	d__Bacteria;p__Proteobacteria;c__Alphaproteobacteria;o__Rhodospirillales;f__Acetobacteraceae;g__unidentified_Acetobacteraceae;s__unidentified_Acetobacteraceae	0.9933201592556359
ASV_24334	d__Bacteria;p__Firmicutes;c__Clostridia;o__Clostridiales;f__[Acidaminobacteraceae];g__Acidaminobacter;s__unidentified_Acidaminobacter	0.9999895247857298
ASV_24797	d__Bacteria;p__Actinobacteria;c__Thermoleophilia;o__Gaiellales;f__Gaiellaceae;g__unidentified_Gaiellaceae;s__unidentified_Gaiellaceae	0.9999651072390654
ASV_10109	d__Bacteria;p__Firmicutes;c__Clostridia;o__Clostridiales;f__unclassified_Clostridiales;g__unclassified_Clostridiales;s__unclassified_Clostridiales	0.9999998970151232
ASV_19214	d__Bacteria;p__Firmicutes;c__Clostridia;o__Clostridiales;f__Ruminococcaceae;g__Oscillospira;s__unidentified_Oscillospira	0.9978545347704513
ASV_23940	d__Bacteria;p__Firmicutes;c__Clostridia;o__Clostridiales;f__Christensenellaceae;g__unidentified_Christensenellaceae;s__unidentified_Christensenellaceae	0.9997154600979066
ASV_2672	d__Bacteria;p__Bacteroidetes;c__[Saprospirae];o__[Saprospirales];f__Chitinophagaceae;g__unidentified_Chitinophagaceae;s__unidentified_Chitinophagaceae	0.9979113792032561
ASV_3150	d__Bacteria;p__Verrucomicrobia;c__Verrucomicrobiae;o__Verrucomicrobiales;f__Verrucomicrobiaceae;g__unidentified_Verrucomicrobiaceae;s__unidentified_Verrucomicrobiaceae	0.9999999994088
ASV_12053	d__Bacteria;p__Proteobacteria;c__Betaproteobacteria;o__Ellin6067;f__unidentified_Ellin6067;g__unidentified_Ellin6067;s__unidentified_Ellin6067	0.9999995143644795
ASV_14415	d__Bacteria;p__Firmicutes;c__Clostridia;o__Clostridiales;f__Lachnospiraceae;g__Dorea;s__unidentified_Dorea	0.9971069780914631
ASV_5529	d__Bacteria;p__Actinobacteria;c__Coriobacteriia;o__Coriobacteriales;f__Coriobacteriaceae;g__Adlercreutzia;s__unidentified_Adlercreutzia	0.9699747746530859
ASV_2402	d__Bacteria;p__Actinobacteria;c__Coriobacteriia;o__Coriobacteriales;f__Coriobacteriaceae;g__Adlercreutzia;s__unidentified_Adlercreutzia	0.9999628797409091
ASV_11839	d__Bacteria;p__Proteobacteria;c__Gammaproteobacteria;o__Xanthomonadales;f__Xanthomonadaceae;g__Rhodanobacter;s__unclassified_Rhodanobacter	0.999901708898371
ASV_7196	d__Bacteria;p__Firmicutes;c__Clostridia;o__Clostridiales;f__Ruminococcaceae;g__unidentified_Ruminococcaceae;s__unidentified_Ruminococcaceae	0.9906473038242397
ASV_1583	d__Bacteria;p__Actinobacteria;c__Thermoleophilia;o__Gaiellales;f__Gaiellaceae;g__unidentified_Gaiellaceae;s__unidentified_Gaiellaceae	0.9995779241311193
ASV_18310	d__Bacteria;p__Proteobacteria;c__Betaproteobacteria;o__Burkholderiales;f__Oxalobacteraceae;g__Massilia;s__unclassified_Massilia	0.9572693139701336
ASV_1777	d__Bacteria;p__Bacteroidetes;c__[Saprospirae];o__[Saprospirales];f__Chitinophagaceae;g__unidentified_Chitinophagaceae;s__unidentified_Chitinophagaceae	0.9975763955291492
ASV_15291	d__Bacteria;p__Firmicutes;c__Clostridia;o__Clostridiales;f__Ruminococcaceae;g__Oscillospira;s__unidentified_Oscillospira	0.9818832794294857
ASV_21598	d__Bacteria;p__Firmicutes;c__Clostridia;o__Clostridiales;f__Ruminococcaceae;g__Oscillospira;s__unidentified_Oscillospira	0.9998974575173006
ASV_23846	d__Bacteria;p__Proteobacteria;c__Alphaproteobacteria;o__Caulobacterales;f__Caulobacteraceae;g__Brevundimonas;s__Brevundimonas_diminuta	0.9599601541280025
ASV_23059	d__Bacteria;p__Actinobacteria;c__Coriobacteriia;o__Coriobacteriales;f__Coriobacteriaceae;g__Adlercreutzia;s__unidentified_Adlercreutzia	0.9999572003629976
ASV_3077	d__Bacteria;p__Firmicutes;c__Clostridia;o__Clostridiales;f__Lachnospiraceae;g__unidentified_Lachnospiraceae;s__unidentified_Lachnospiraceae	0.9757158431002445
ASV_22544	d__Bacteria;p__Firmicutes;c__Clostridia;o__Clostridiales;f__Ruminococcaceae;g__unidentified_Ruminococcaceae;s__unidentified_Ruminococcaceae	0.9697270944627504
ASV_22407	d__Bacteria;p__Bacteroidetes;c__Bacteroidia;o__Bacteroidales;f__unclassified_Bacteroidales;g__unclassified_Bacteroidales;s__unclassified_Bacteroidales	0.9999395212489692
ASV_6723	d__Bacteria;p__Spirochaetes;c__Spirochaetes;o__Spirochaetales;f__Spirochaetaceae;g__Treponema;s__unidentified_Treponema	0.9999999908648647
ASV_4139	d__Bacteria;p__Tenericutes;c__Mollicutes;o__RF39;f__unidentified_RF39;g__unidentified_RF39;s__unidentified_RF39	0.9999997837941755
ASV_3416	d__Bacteria;p__Chloroflexi;c__Ellin6529;o__unidentified_Ellin6529;f__unidentified_Ellin6529;g__unidentified_Ellin6529;s__unidentified_Ellin6529	0.9999999875075788
ASV_10744	d__Bacteria;p__Bacteroidetes;c__Flavobacteriia;o__Flavobacteriales;f__Flavobacteriaceae;g__Flavobacterium;s__Flavobacterium_frigidarium	0.9996500041535966
ASV_21839	d__Bacteria;p__Firmicutes;c__Clostridia;o__Clostridiales;f__unidentified_Clostridiales;g__unidentified_Clostridiales;s__unidentified_Clostridiales	0.7785652816654691
ASV_14218	d__Bacteria;p__Firmicutes;c__Clostridia;o__Clostridiales;f__Ruminococcaceae;g__Oscillospira;s__unidentified_Oscillospira	0.9988857377970438
ASV_17541	d__Bacteria;p__Actinobacteria;c__Thermoleophilia;o__Gaiellales;f__Gaiellaceae;g__unidentified_Gaiellaceae;s__unidentified_Gaiellaceae	0.9995604146030325
ASV_20845	d__Bacteria;p__Proteobacteria;c__Alphaproteobacteria;o__Rhizobiales;f__Phyllobacteriaceae;g__Mesorhizobium;s__unidentified_Mesorhizobium	0.8185261650661206
ASV_25781	d__Bacteria;p__Firmicutes;c__Clostridia;o__Clostridiales;f__unidentified_Clostridiales;g__unidentified_Clostridiales;s__unidentified_Clostridiales	0.9998477638010124
ASV_11895	d__Bacteria;p__Firmicutes;c__Clostridia;o__Clostridiales;f__unclassified_Clostridiales;g__unclassified_Clostridiales;s__unclassified_Clostridiales	0.9999999999790062
ASV_1177	d__Bacteria;p__Firmicutes;c__Clostridia;o__Clostridiales;f__Christensenellaceae;g__unidentified_Christensenellaceae;s__unidentified_Christensenellaceae	0.998591336247617
ASV_18266	d__Bacteria;p__Firmicutes;c__Erysipelotrichi;o__Erysipelotrichales;f__Erysipelotrichaceae;g__p-75-a5;s__unidentified_p-75-a5	0.9999999690426198
ASV_12321	d__Bacteria;p__Firmicutes;c__Clostridia;o__Clostridiales;f__Ruminococcaceae;g__unidentified_Ruminococcaceae;s__unidentified_Ruminococcaceae	0.9971968813152925
ASV_23624	d__Bacteria;p__Bacteroidetes;c__Sphingobacteriia;o__Sphingobacteriales;f__Sphingobacteriaceae;g__unidentified_Sphingobacteriaceae;s__unidentified_Sphingobacteriaceae	0.9502441062332997
ASV_13216	d__Bacteria;p__TM7;c__TM7-1;o__unidentified_TM7-1;f__unidentified_TM7-1;g__unidentified_TM7-1;s__unidentified_TM7-1	0.9999033108144149
ASV_20041	d__Bacteria;p__Firmicutes;c__Clostridia;o__Clostridiales;f__Clostridiaceae;g__Proteiniclasticum;s__unidentified_Proteiniclasticum	0.9994053961302767
ASV_16751	d__Bacteria;p__Actinobacteria;c__Actinobacteria;o__Actinomycetales;f__Geodermatophilaceae;g__unclassified_Geodermatophilaceae;s__unclassified_Geodermatophilaceae	0.9992425446700035
ASV_11870	d__Bacteria;p__Proteobacteria;c__Alphaproteobacteria;o__Rhizobiales;f__Hyphomicrobiaceae;g__Devosia;s__unidentified_Devosia	0.9997763924386179
ASV_15155	d__Bacteria;p__Proteobacteria;c__Alphaproteobacteria;o__Rhizobiales;f__Hyphomicrobiaceae;g__Rhodoplanes;s__unidentified_Rhodoplanes	0.9999585465952231
ASV_22559	d__Bacteria;p__Firmicutes;c__Clostridia;o__Clostridiales;f__unidentified_Clostridiales;g__unidentified_Clostridiales;s__unidentified_Clostridiales	0.9103077120456471
ASV_10061	d__Bacteria;p__TM7;c__TM7-1;o__unidentified_TM7-1;f__unidentified_TM7-1;g__unidentified_TM7-1;s__unidentified_TM7-1	0.9999779340652668
ASV_20418	d__Bacteria;p__Firmicutes;c__Clostridia;o__Clostridiales;f__unclassified_Clostridiales;g__unclassified_Clostridiales;s__unclassified_Clostridiales	0.9993810140972615
ASV_4618	d__Bacteria;p__Firmicutes;c__Clostridia;o__Clostridiales;f__unidentified_Clostridiales;g__unidentified_Clostridiales;s__unidentified_Clostridiales	0.9909480869130444
ASV_95	d__Bacteria;p__Firmicutes;c__Clostridia;o__Clostridiales;f__Ruminococcaceae;g__unidentified_Ruminococcaceae;s__unidentified_Ruminococcaceae	0.9247092433401948
ASV_2455	d__Bacteria;p__Firmicutes;c__Clostridia;o__Clostridiales;f__Ruminococcaceae;g__Oscillospira;s__unidentified_Oscillospira	0.9978834021657083
ASV_4113	d__Bacteria;p__Firmicutes;c__Clostridia;o__Clostridiales;f__unidentified_Clostridiales;g__unidentified_Clostridiales;s__unidentified_Clostridiales	0.7210338748722683
ASV_1327	d__Bacteria;p__Actinobacteria;c__Actinobacteria;o__Actinomycetales;f__Micrococcaceae;g__Rothia;s__Rothia_nasimurium	0.958816980619492
ASV_18185	d__Bacteria;p__Acidobacteria;c__Acidobacteriia;o__Acidobacteriales;f__Acidobacteriaceae;g__unidentified_Acidobacteriaceae;s__unidentified_Acidobacteriaceae	0.9978603293928612
ASV_22351	d__Bacteria;p__Firmicutes;c__Clostridia;o__Clostridiales;f__Ruminococcaceae;g__unclassified_Ruminococcaceae;s__unclassified_Ruminococcaceae	0.9999331776732425
ASV_5079	d__Bacteria;p__Firmicutes;c__Bacilli;o__Bacillales;f__Planococcaceae;g__Sporosarcina;s__unclassified_Sporosarcina	0.7497424901396135
ASV_16391	d__Bacteria;p__Firmicutes;c__Clostridia;o__Clostridiales;f__Peptostreptococcaceae;g__Clostridium;s__Clostridium_sticklandii	0.9983211421645383
ASV_25160	d__Bacteria;p__Firmicutes;c__Clostridia;o__Clostridiales;f__unidentified_Clostridiales;g__unidentified_Clostridiales;s__unidentified_Clostridiales	0.8066372564933402
ASV_21286	d__Bacteria;p__Firmicutes;c__Erysipelotrichi;o__Erysipelotrichales;f__Erysipelotrichaceae;g__p-75-a5;s__unidentified_p-75-a5	0.9999853004127692
ASV_11957	d__Bacteria;p__Firmicutes;c__Clostridia;o__Clostridiales;f__Ruminococcaceae;g__Oscillospira;s__unidentified_Oscillospira	0.9999161084504088
ASV_15667	d__Bacteria;p__Firmicutes;c__Clostridia;o__Clostridiales;f__Ruminococcaceae;g__Oscillospira;s__unidentified_Oscillospira	0.8799004977338731
ASV_10893	d__Bacteria;p__Bacteroidetes;c__Bacteroidia;o__Bacteroidales;f__unclassified_Bacteroidales;g__unclassified_Bacteroidales;s__unclassified_Bacteroidales	0.9999999998731532
ASV_22972	d__Bacteria;p__Tenericutes;c__Mollicutes;o__RF39;f__unidentified_RF39;g__unidentified_RF39;s__unidentified_RF39	0.9999999971694251
ASV_18049	d__Bacteria;p__Bacteroidetes;c__Flavobacteriia;o__Flavobacteriales;f__Flavobacteriaceae;g__Flavobacterium;s__Flavobacterium_frigidarium	0.9992097330255096
ASV_6514	d__Bacteria;p__Spirochaetes;c__Spirochaetes;o__Spirochaetales;f__Spirochaetaceae;g__Treponema;s__unidentified_Treponema	0.999923540279773
ASV_4227	d__Bacteria;p__TM7;c__TM7-1;o__unidentified_TM7-1;f__unidentified_TM7-1;g__unidentified_TM7-1;s__unidentified_TM7-1	0.9995298850309184
ASV_25693	d__Bacteria;p__Actinobacteria;c__Thermoleophilia;o__Gaiellales;f__Gaiellaceae;g__unidentified_Gaiellaceae;s__unidentified_Gaiellaceae	0.9989056490606598
ASV_11146	d__Bacteria;p__Actinobacteria;c__Actinobacteria;o__Actinomycetales;f__Frankiaceae;g__unidentified_Frankiaceae;s__unidentified_Frankiaceae	0.9816299684504748
ASV_5131	d__Bacteria;p__Actinobacteria;c__Thermoleophilia;o__Gaiellales;f__Gaiellaceae;g__unidentified_Gaiellaceae;s__unidentified_Gaiellaceae	0.999874073996495
ASV_12936	d__Bacteria;p__Firmicutes;c__Clostridia;o__Clostridiales;f__Lachnospiraceae;g__Coprococcus;s__unidentified_Coprococcus	0.9154828594560868
ASV_10525	d__Bacteria;p__Proteobacteria;c__Gammaproteobacteria;o__Pseudomonadales;f__Moraxellaceae;g__Acinetobacter;s__Acinetobacter_johnsonii	0.7425666513322736
ASV_5086	d__Bacteria;p__TM7;c__TM7-1;o__unidentified_TM7-1;f__unidentified_TM7-1;g__unidentified_TM7-1;s__unidentified_TM7-1	0.999999977377769
ASV_25699	d__Bacteria;p__Firmicutes;c__Clostridia;o__Clostridiales;f__Ruminococcaceae;g__unidentified_Ruminococcaceae;s__unidentified_Ruminococcaceae	0.9981487897574901
ASV_14735	d__Bacteria;p__TM7;c__TM7-1;o__unidentified_TM7-1;f__unidentified_TM7-1;g__unidentified_TM7-1;s__unidentified_TM7-1	0.9999537135294452
ASV_18852	d__Bacteria;p__Firmicutes;c__Clostridia;o__Clostridiales;f__Caldicoprobacteraceae;g__Caldicoprobacter;s__unidentified_Caldicoprobacter	0.9999852710661944
ASV_25772	d__Bacteria;p__Firmicutes;c__Erysipelotrichi;o__Erysipelotrichales;f__Erysipelotrichaceae;g__unidentified_Erysipelotrichaceae;s__unidentified_Erysipelotrichaceae	0.9735411046113362
ASV_6741	d__Bacteria;p__Firmicutes;c__Clostridia;o__Clostridiales;f__Ruminococcaceae;g__unidentified_Ruminococcaceae;s__unidentified_Ruminococcaceae	0.7329735564571627
ASV_20788	d__Bacteria;p__Actinobacteria;c__Actinobacteria;o__Bifidobacteriales;f__Bifidobacteriaceae;g__Bifidobacterium;s__Bifidobacterium_thermacidophilum	0.9845859856973598
ASV_14464	d__Bacteria;p__Firmicutes;c__Clostridia;o__Clostridiales;f__Christensenellaceae;g__unidentified_Christensenellaceae;s__unidentified_Christensenellaceae	0.9999003563011989
ASV_2809	d__Bacteria;p__Firmicutes;c__Clostridia;o__Clostridiales;f__unclassified_Clostridiales;g__unclassified_Clostridiales;s__unclassified_Clostridiales	0.9999996772954023
ASV_21471	d__Bacteria;p__Firmicutes;c__Clostridia;o__Clostridiales;f__Ruminococcaceae;g__Oscillospira;s__unidentified_Oscillospira	0.9963409038025075
ASV_14872	d__Bacteria;p__Firmicutes;c__Clostridia;o__Clostridiales;f__Ruminococcaceae;g__Ruminococcus;s__Ruminococcus_bromii	0.9265452510785424
ASV_26404	d__Bacteria;p__Bacteroidetes;c__Bacteroidia;o__Bacteroidales;f__Bacteroidaceae;g__Bacteroides;s__Bacteroides_caccae	0.9836443550983222
ASV_14707	d__Bacteria;p__Bacteroidetes;c__Bacteroidia;o__Bacteroidales;f__Prevotellaceae;g__Prevotella;s__unidentified_Prevotella	0.9998496352303485
ASV_6323	d__Bacteria;p__Firmicutes;c__Clostridia;o__Clostridiales;f__Lachnospiraceae;g__Roseburia;s__unidentified_Roseburia	0.800076392786813
ASV_1651	d__Bacteria;p__Firmicutes;c__Clostridia;o__Clostridiales;f__Christensenellaceae;g__unidentified_Christensenellaceae;s__unidentified_Christensenellaceae	0.9542884255622138
ASV_21504	d__Bacteria;p__Bacteroidetes;c__[Saprospirae];o__[Saprospirales];f__Chitinophagaceae;g__unidentified_Chitinophagaceae;s__unidentified_Chitinophagaceae	0.999166239032214
ASV_11136	d__Bacteria;p__Actinobacteria;c__Actinobacteria;o__Actinomycetales;f__Nocardioidaceae;g__Nocardioides;s__unidentified_Nocardioides	0.8259407135618823
ASV_4726	d__Bacteria;p__Actinobacteria;c__Thermoleophilia;o__Solirubrobacterales;f__unidentified_Solirubrobacterales;g__unidentified_Solirubrobacterales;s__unidentified_Solirubrobacterales	0.9999859849482823
ASV_23884	d__Bacteria;p__Acidobacteria;c__Solibacteres;o__Solibacterales;f__Solibacteraceae;g__Candidatus_Solibacter;s__unidentified_Candidatus_Solibacter	0.9999048773134667
ASV_17970	d__Bacteria;p__Proteobacteria;c__Betaproteobacteria;o__Burkholderiales;f__Comamonadaceae;g__unclassified_Comamonadaceae;s__unclassified_Comamonadaceae	0.9999883880697432
ASV_3700	d__Bacteria;p__Firmicutes;c__Clostridia;o__Clostridiales;f__Lachnospiraceae;g__Dorea;s__unidentified_Dorea	0.792327750684908
ASV_257	d__Bacteria;p__Bacteroidetes;c__Bacteroidia;o__Bacteroidales;f__Prevotellaceae;g__Prevotella;s__unidentified_Prevotella	0.9994508916089435
ASV_2192	d__Bacteria;p__Proteobacteria;c__Gammaproteobacteria;o__Pseudomonadales;f__Moraxellaceae;g__Acinetobacter;s__Acinetobacter_johnsonii	0.7903565683808736
ASV_25169	d__Bacteria;p__Actinobacteria;c__Actinobacteria;o__Actinomycetales;f__Geodermatophilaceae;g__unclassified_Geodermatophilaceae;s__unclassified_Geodermatophilaceae	0.9982188450230186
ASV_8417	d__Bacteria;p__Proteobacteria;c__Deltaproteobacteria;o__Myxococcales;f__Haliangiaceae;g__unidentified_Haliangiaceae;s__unidentified_Haliangiaceae	0.9999965572552444
ASV_25782	d__Bacteria;p__Proteobacteria;c__Betaproteobacteria;o__Burkholderiales;f__Burkholderiaceae;g__Burkholderia;s__unidentified_Burkholderia	0.8344481642010311
ASV_6071	d__Bacteria;p__Firmicutes;c__Clostridia;o__Clostridiales;f__Clostridiaceae;g__Caloramator;s__unidentified_Caloramator	0.9997664054373594
ASV_5951	d__Bacteria;p__Proteobacteria;c__Gammaproteobacteria;o__Xanthomonadales;f__Xanthomonadaceae;g__unidentified_Xanthomonadaceae;s__unidentified_Xanthomonadaceae	0.9926838112896071
ASV_3045	d__Bacteria;p__[Thermi];c__Deinococci;o__Deinococcales;f__Deinococcaceae;g__Deinococcus;s__unidentified_Deinococcus	0.9999995952950338
ASV_14412	d__Bacteria;p__Firmicutes;c__Clostridia;o__Clostridiales;f__Lachnospiraceae;g__unidentified_Lachnospiraceae;s__unidentified_Lachnospiraceae	0.7732969585104402
ASV_24632	d__Bacteria;p__Proteobacteria;c__Alphaproteobacteria;o__Rhizobiales;f__Beijerinckiaceae;g__Chelatococcus;s__unidentified_Chelatococcus	0.9991817113768555
ASV_7525	d__Bacteria;p__Proteobacteria;c__Alphaproteobacteria;o__Rhodospirillales;f__Rhodospirillaceae;g__Reyranella;s__Reyranella_massiliensis	0.9842499664576504
ASV_11939	d__Bacteria;p__Firmicutes;c__Bacilli;o__Bacillales;f__Bacillaceae;g__Bacillus;s__unclassified_Bacillus	0.9669970549161024
ASV_14450	d__Bacteria;p__Firmicutes;c__Clostridia;o__Clostridiales;f__Ruminococcaceae;g__Oscillospira;s__unidentified_Oscillospira	0.7283948666471527
ASV_12867	d__Bacteria;p__Firmicutes;c__Clostridia;o__Clostridiales;f__[Mogibacteriaceae];g__unidentified_[Mogibacteriaceae];s__unidentified_[Mogibacteriaceae]	0.9747693779549131
ASV_12507	d__Bacteria;p__Firmicutes;c__Clostridia;o__Clostridiales;f__[Mogibacteriaceae];g__unidentified_[Mogibacteriaceae];s__unidentified_[Mogibacteriaceae]	0.9999608728320822
ASV_4007	d__Bacteria;p__Actinobacteria;c__Actinobacteria;o__Actinomycetales;f__Micromonosporaceae;g__unclassified_Micromonosporaceae;s__unclassified_Micromonosporaceae	0.9997391428967239
ASV_21948	d__Bacteria;p__Actinobacteria;c__unclassified_Actinobacteria;o__unclassified_Actinobacteria;f__unclassified_Actinobacteria;g__unclassified_Actinobacteria;s__unclassified_Actinobacteria	0.9999645666143285
ASV_6920	d__Bacteria;p__Firmicutes;c__Clostridia;o__Clostridiales;f__Lachnospiraceae;g__Blautia;s__unidentified_Blautia	0.9850851123910395
ASV_3406	d__Bacteria;p__Firmicutes;c__Clostridia;o__Clostridiales;f__unidentified_Clostridiales;g__unidentified_Clostridiales;s__unidentified_Clostridiales	0.8912058296798708
ASV_19989	d__Bacteria;p__Proteobacteria;c__Gammaproteobacteria;o__Pseudomonadales;f__Moraxellaceae;g__Acinetobacter;s__unclassified_Acinetobacter	0.9999855441125942
ASV_4971	d__Bacteria;p__Firmicutes;c__Clostridia;o__Clostridiales;f__unclassified_Clostridiales;g__unclassified_Clostridiales;s__unclassified_Clostridiales	0.9999999999438125
ASV_23778	d__Bacteria;p__Firmicutes;c__Clostridia;o__Clostridiales;f__Ruminococcaceae;g__unidentified_Ruminococcaceae;s__unidentified_Ruminococcaceae	0.9982195557152593
ASV_5446	d__Bacteria;p__Firmicutes;c__Clostridia;o__Clostridiales;f__unclassified_Clostridiales;g__unclassified_Clostridiales;s__unclassified_Clostridiales	0.9999999869501925
ASV_8567	d__Bacteria;p__Bacteroidetes;c__Bacteroidia;o__Bacteroidales;f__unidentified_Bacteroidales;g__unidentified_Bacteroidales;s__unidentified_Bacteroidales	0.988244892047861
ASV_15020	d__Bacteria;p__Firmicutes;c__Clostridia;o__Clostridiales;f__unidentified_Clostridiales;g__unidentified_Clostridiales;s__unidentified_Clostridiales	0.9665004125427575
ASV_6372	d__Bacteria;p__Firmicutes;c__Clostridia;o__Clostridiales;f__Lachnospiraceae;g__unidentified_Lachnospiraceae;s__unidentified_Lachnospiraceae	0.8261649902377756
ASV_419	d__Bacteria;p__Firmicutes;c__Erysipelotrichi;o__Erysipelotrichales;f__Erysipelotrichaceae;g__Holdemania;s__unidentified_Holdemania	0.9999995137713188
ASV_12678	d__Bacteria;p__Firmicutes;c__Clostridia;o__Clostridiales;f__Clostridiaceae;g__Sarcina;s__unidentified_Sarcina	0.9968950487305998
ASV_425	d__Bacteria;p__Acidobacteria;c__[Chloracidobacteria];o__RB41;f__unidentified_RB41;g__unidentified_RB41;s__unidentified_RB41	0.9999999995967812
ASV_14367	d__Bacteria;p__Actinobacteria;c__Actinobacteria;o__Actinomycetales;f__Streptomycetaceae;g__Streptomyces;s__unclassified_Streptomyces	0.8227049062326186
ASV_8849	d__Bacteria;p__Firmicutes;c__Clostridia;o__Clostridiales;f__Ruminococcaceae;g__unidentified_Ruminococcaceae;s__unidentified_Ruminococcaceae	0.9934248041776101
ASV_1500	d__Bacteria;p__Acidobacteria;c__Solibacteres;o__Solibacterales;f__unidentified_Solibacterales;g__unidentified_Solibacterales;s__unidentified_Solibacterales	0.9999872892663082
ASV_13924	d__Bacteria;p__Proteobacteria;c__Betaproteobacteria;o__Burkholderiales;f__Comamonadaceae;g__Polaromonas;s__unidentified_Polaromonas	0.9551511262102185
ASV_12082	d__Bacteria;p__Verrucomicrobia;c__[Spartobacteria];o__[Chthoniobacterales];f__[Chthoniobacteraceae];g__DA101;s__unidentified_DA101	0.9999550653486111
ASV_3559	d__Bacteria;p__Firmicutes;c__Clostridia;o__Clostridiales;f__Ruminococcaceae;g__unidentified_Ruminococcaceae;s__unidentified_Ruminococcaceae	0.9991744835152861
ASV_3153	d__Bacteria;p__Firmicutes;c__Bacilli;o__Lactobacillales;f__Lactobacillaceae;g__Lactobacillus;s__unidentified_Lactobacillus	0.999876964188247
ASV_25574	d__Bacteria;p__Firmicutes;c__Clostridia;o__Clostridiales;f__unidentified_Clostridiales;g__unidentified_Clostridiales;s__unidentified_Clostridiales	0.9999803988960441
ASV_16908	d__Bacteria;p__Bacteroidetes;c__Bacteroidia;o__Bacteroidales;f__unidentified_Bacteroidales;g__unidentified_Bacteroidales;s__unidentified_Bacteroidales	0.9999960976182907
ASV_2142	d__Bacteria;p__Spirochaetes;c__Spirochaetes;o__Spirochaetales;f__Spirochaetaceae;g__Treponema;s__unidentified_Treponema	0.9999587164107254
ASV_24877	d__Bacteria;p__Actinobacteria;c__Actinobacteria;o__Actinomycetales;f__Thermomonosporaceae;g__Actinomadura;s__Actinomadura_alba	0.8320464151289937
ASV_25025	d__Bacteria;p__Firmicutes;c__Clostridia;o__Clostridiales;f__Ruminococcaceae;g__Ruminococcus;s__unidentified_Ruminococcus	0.9717575691836543
ASV_8118	d__Bacteria;p__Firmicutes;c__Clostridia;o__Clostridiales;f__unidentified_Clostridiales;g__unidentified_Clostridiales;s__unidentified_Clostridiales	0.8606841910236782
ASV_20019	d__Bacteria;p__Firmicutes;c__Bacilli;o__Bacillales;f__Bacillaceae;g__Bacillus;s__Bacillus_flexus	0.978136220483688
ASV_20337	d__Bacteria;p__Bacteroidetes;c__Flavobacteriia;o__Flavobacteriales;f__Flavobacteriaceae;g__Flavobacterium;s__Flavobacterium_frigidarium	0.9986894909920804
ASV_3291	d__Bacteria;p__Actinobacteria;c__Actinobacteria;o__Actinomycetales;f__Microbacteriaceae;g__unclassified_Microbacteriaceae;s__unclassified_Microbacteriaceae	0.9999929113684937
ASV_3938	d__Bacteria;p__Firmicutes;c__Bacilli;o__Lactobacillales;f__Lactobacillaceae;g__Lactobacillus;s__unidentified_Lactobacillus	0.7449795740656064
ASV_22489	d__Bacteria;p__Firmicutes;c__Clostridia;o__Clostridiales;f__Ruminococcaceae;g__unidentified_Ruminococcaceae;s__unidentified_Ruminococcaceae	0.9986374444822042
ASV_3184	d__Bacteria;p__Gemmatimonadetes;c__Gemmatimonadetes;o__Ellin5290;f__unidentified_Ellin5290;g__unidentified_Ellin5290;s__unidentified_Ellin5290	0.9485577362393944
ASV_8960	d__Bacteria;p__Firmicutes;c__Clostridia;o__Clostridiales;f__Lachnospiraceae;g__Shuttleworthia;s__unidentified_Shuttleworthia	0.9984470174596968
ASV_25762	d__Bacteria;p__Proteobacteria;c__Alphaproteobacteria;o__Rhizobiales;f__unclassified_Rhizobiales;g__unclassified_Rhizobiales;s__unclassified_Rhizobiales	0.9997759079133454
ASV_24618	d__Bacteria;p__Firmicutes;c__Clostridia;o__Clostridiales;f__Lachnospiraceae;g__unidentified_Lachnospiraceae;s__unidentified_Lachnospiraceae	0.9027528447855081
ASV_24287	d__Bacteria;p__Firmicutes;c__Bacilli;o__Bacillales;f__Bacillaceae;g__Bacillus;s__unidentified_Bacillus	0.8946908214648254
ASV_12894	d__Bacteria;p__Firmicutes;c__Clostridia;o__Clostridiales;f__unidentified_Clostridiales;g__unidentified_Clostridiales;s__unidentified_Clostridiales	0.9999522591825818
ASV_18298	d__Bacteria;p__Firmicutes;c__Clostridia;o__Clostridiales;f__Clostridiaceae;g__Proteiniclasticum;s__unidentified_Proteiniclasticum	0.9999962037453409
ASV_12740	d__Bacteria;p__Proteobacteria;c__Betaproteobacteria;o__Burkholderiales;f__Comamonadaceae;g__unclassified_Comamonadaceae;s__unclassified_Comamonadaceae	0.9999998022560921
ASV_10948	d__Bacteria;p__Actinobacteria;c__Thermoleophilia;o__Solirubrobacterales;f__Solirubrobacteraceae;g__unidentified_Solirubrobacteraceae;s__unidentified_Solirubrobacteraceae	0.931028715528024
ASV_5944	d__Bacteria;p__Firmicutes;c__Clostridia;o__Clostridiales;f__Ruminococcaceae;g__unidentified_Ruminococcaceae;s__unidentified_Ruminococcaceae	0.7256456037240223
ASV_22497	d__Bacteria;p__Actinobacteria;c__Thermoleophilia;o__Gaiellales;f__Gaiellaceae;g__unidentified_Gaiellaceae;s__unidentified_Gaiellaceae	0.9999636562684912
ASV_20498	d__Bacteria;p__Bacteroidetes;c__Bacteroidia;o__Bacteroidales;f__Prevotellaceae;g__Prevotella;s__unidentified_Prevotella	0.9999752083847046
ASV_1922	d__Bacteria;p__Proteobacteria;c__Deltaproteobacteria;o__Myxococcales;f__unidentified_Myxococcales;g__unidentified_Myxococcales;s__unidentified_Myxococcales	0.9999563114802171
ASV_14520	d__Bacteria;p__Proteobacteria;c__Gammaproteobacteria;o__Aeromonadales;f__Succinivibrionaceae;g__Succinivibrio;s__unidentified_Succinivibrio	0.9999999921328424
ASV_17209	d__Bacteria;p__Firmicutes;c__Clostridia;o__Clostridiales;f__unclassified_Clostridiales;g__unclassified_Clostridiales;s__unclassified_Clostridiales	0.9999999974259552
ASV_18032	d__Bacteria;p__Bacteroidetes;c__Cytophagia;o__Cytophagales;f__Cytophagaceae;g__Runella;s__unidentified_Runella	0.9999999999961062
ASV_487	d__Bacteria;p__Firmicutes;c__Clostridia;o__Clostridiales;f__Ruminococcaceae;g__Oscillospira;s__unidentified_Oscillospira	0.8801512478461593
ASV_15320	d__Bacteria;p__Bacteroidetes;c__Sphingobacteriia;o__Sphingobacteriales;f__Sphingobacteriaceae;g__unidentified_Sphingobacteriaceae;s__unidentified_Sphingobacteriaceae	0.9514429116164214
ASV_407	d__Bacteria;p__Bacteroidetes;c__Sphingobacteriia;o__Sphingobacteriales;f__unidentified_Sphingobacteriales;g__unidentified_Sphingobacteriales;s__unidentified_Sphingobacteriales	0.9999901691256874
ASV_26270	d__Bacteria;p__unclassified_Bacteria;c__unclassified_Bacteria;o__unclassified_Bacteria;f__unclassified_Bacteria;g__unclassified_Bacteria;s__unclassified_Bacteria	0.9999999999951007
ASV_9830	d__Bacteria;p__Actinobacteria;c__Actinobacteria;o__Actinomycetales;f__Micromonosporaceae;g__Dactylosporangium;s__unidentified_Dactylosporangium	0.7533722162142009
ASV_24517	d__Bacteria;p__Firmicutes;c__Bacilli;o__Bacillales;f__Paenibacillaceae;g__Ammoniphilus;s__unidentified_Ammoniphilus	0.9850686431776939
ASV_7630	d__Bacteria;p__Firmicutes;c__Clostridia;o__Clostridiales;f__Clostridiaceae;g__Proteiniclasticum;s__unidentified_Proteiniclasticum	0.9999753165928831
ASV_9277	d__Bacteria;p__Actinobacteria;c__Actinobacteria;o__Actinomycetales;f__Micromonosporaceae;g__unclassified_Micromonosporaceae;s__unclassified_Micromonosporaceae	0.9999807910215825
ASV_14353	d__Bacteria;p__Actinobacteria;c__Actinobacteria;o__Actinomycetales;f__Pseudonocardiaceae;g__Pseudonocardia;s__unclassified_Pseudonocardia	0.9997039400743293
ASV_2748	d__Bacteria;p__Proteobacteria;c__Gammaproteobacteria;o__Pseudomonadales;f__Moraxellaceae;g__Acinetobacter;s__Acinetobacter_lwoffii	0.7584920945631524
ASV_25328	d__Bacteria;p__Actinobacteria;c__Actinobacteria;o__Actinomycetales;f__Mycobacteriaceae;g__Mycobacterium;s__Mycobacterium_vaccae	0.992185013535668
ASV_4302	d__Bacteria;p__Acidobacteria;c__Acidobacteriia;o__Acidobacteriales;f__Acidobacteriaceae;g__Terriglobus;s__Terriglobus_saanensis	0.8153804859071829
ASV_22055	d__Bacteria;p__Chloroflexi;c__TK10;o__B07_WMSP1;f__unidentified_B07_WMSP1;g__unidentified_B07_WMSP1;s__unidentified_B07_WMSP1	0.9999976775473808
ASV_7919	d__Bacteria;p__Bacteroidetes;c__Bacteroidia;o__Bacteroidales;f__[Paraprevotellaceae];g__CF231;s__unidentified_CF231	0.99996672149547
ASV_23505	d__Bacteria;p__Actinobacteria;c__Actinobacteria;o__Actinomycetales;f__Nocardioidaceae;g__unidentified_Nocardioidaceae;s__unidentified_Nocardioidaceae	0.948153579290491
ASV_16474	d__Bacteria;p__Bacteroidetes;c__Bacteroidia;o__Bacteroidales;f__unidentified_Bacteroidales;g__unidentified_Bacteroidales;s__unidentified_Bacteroidales	0.9999950896597959
ASV_11603	d__Bacteria;p__Firmicutes;c__Clostridia;o__Clostridiales;f__unidentified_Clostridiales;g__unidentified_Clostridiales;s__unidentified_Clostridiales	0.9977942054269051
ASV_20770	d__Bacteria;p__Firmicutes;c__Bacilli;o__Bacillales;f__Bacillaceae;g__Bacillus;s__unidentified_Bacillus	0.7186882520409028
ASV_22028	d__Bacteria;p__Actinobacteria;c__Actinobacteria;o__Actinomycetales;f__Streptosporangiaceae;g__Sphaerisporangium;s__unidentified_Sphaerisporangium	0.9799962132511938
ASV_26371	d__Bacteria;p__Acidobacteria;c__Acidobacteriia;o__Acidobacteriales;f__Acidobacteriaceae;g__unidentified_Acidobacteriaceae;s__unidentified_Acidobacteriaceae	0.9114347688812994
ASV_12466	d__Bacteria;p__Armatimonadetes;c__Armatimonadia;o__FW68;f__unidentified_FW68;g__unidentified_FW68;s__unidentified_FW68	0.9999999999986358
ASV_22924	d__Bacteria;p__Proteobacteria;c__Gammaproteobacteria;o__Legionellales;f__Legionellaceae;g__unclassified_Legionellaceae;s__unclassified_Legionellaceae	0.9998266934465758
ASV_4685	d__Bacteria;p__Firmicutes;c__Bacilli;o__Lactobacillales;f__Lactobacillaceae;g__Lactobacillus;s__unidentified_Lactobacillus	0.9230469461422628
ASV_1490	d__Bacteria;p__Firmicutes;c__Erysipelotrichi;o__Erysipelotrichales;f__Erysipelotrichaceae;g__unidentified_Erysipelotrichaceae;s__unidentified_Erysipelotrichaceae	0.9549368235976113
ASV_12771	d__Bacteria;p__Firmicutes;c__Clostridia;o__Clostridiales;f__Lachnospiraceae;g__unclassified_Lachnospiraceae;s__unclassified_Lachnospiraceae	0.9911285179667626
ASV_9425	d__Bacteria;p__Proteobacteria;c__Gammaproteobacteria;o__Alteromonadales;f__Shewanellaceae;g__Shewanella;s__unidentified_Shewanella	0.9999844299760196
ASV_14395	d__Bacteria;p__Firmicutes;c__Clostridia;o__Clostridiales;f__Lachnospiraceae;g__unidentified_Lachnospiraceae;s__unidentified_Lachnospiraceae	0.9355646147306584
ASV_4882	d__Bacteria;p__Spirochaetes;c__Spirochaetes;o__Spirochaetales;f__Spirochaetaceae;g__Treponema;s__unidentified_Treponema	0.9999999879888436
ASV_2226	d__Bacteria;p__Firmicutes;c__Clostridia;o__Clostridiales;f__unclassified_Clostridiales;g__unclassified_Clostridiales;s__unclassified_Clostridiales	0.9999999998566738
ASV_17995	d__Bacteria;p__Firmicutes;c__Clostridia;o__Clostridiales;f__Lachnospiraceae;g__unidentified_Lachnospiraceae;s__unidentified_Lachnospiraceae	0.8428464165277024
ASV_588	d__Bacteria;p__Proteobacteria;c__Alphaproteobacteria;o__Rhizobiales;f__Bradyrhizobiaceae;g__Bosea;s__Bosea_genosp.	0.951560154540472
ASV_2699	d__Bacteria;p__Bacteroidetes;c__Flavobacteriia;o__Flavobacteriales;f__Flavobacteriaceae;g__Flavobacterium;s__Flavobacterium_frigidarium	0.9971119551222937
ASV_16652	d__Bacteria;p__Proteobacteria;c__Alphaproteobacteria;o__Rhizobiales;f__Bradyrhizobiaceae;g__unclassified_Bradyrhizobiaceae;s__unclassified_Bradyrhizobiaceae	0.999996668342602
ASV_7062	d__Bacteria;p__Proteobacteria;c__Betaproteobacteria;o__Burkholderiales;f__Comamonadaceae;g__Delftia;s__unidentified_Delftia	0.8999916399855491
ASV_10516	d__Bacteria;p__Proteobacteria;c__Betaproteobacteria;o__SC-I-84;f__unidentified_SC-I-84;g__unidentified_SC-I-84;s__unidentified_SC-I-84	0.9987819600318473
ASV_3124	d__Bacteria;p__Firmicutes;c__Clostridia;o__Clostridiales;f__unclassified_Clostridiales;g__unclassified_Clostridiales;s__unclassified_Clostridiales	0.9999999995904575
ASV_12498	d__Bacteria;p__Proteobacteria;c__Betaproteobacteria;o__Burkholderiales;f__Alcaligenaceae;g__Castellaniella;s__Castellaniella_defragrans	0.7632512158044112
ASV_20646	d__Bacteria;p__Firmicutes;c__Clostridia;o__Clostridiales;f__Clostridiaceae;g__Proteiniclasticum;s__unidentified_Proteiniclasticum	0.9999975123619398
ASV_13521	d__Bacteria;p__Firmicutes;c__Clostridia;o__Clostridiales;f__Ruminococcaceae;g__unidentified_Ruminococcaceae;s__unidentified_Ruminococcaceae	0.9665778140303645
ASV_5732	d__Bacteria;p__Firmicutes;c__Clostridia;o__Clostridiales;f__unidentified_Clostridiales;g__unidentified_Clostridiales;s__unidentified_Clostridiales	0.9996880519400616
ASV_21144	d__Bacteria;p__Firmicutes;c__Clostridia;o__Clostridiales;f__Ruminococcaceae;g__Oscillospira;s__unidentified_Oscillospira	0.9995688138812279
ASV_13663	d__Bacteria;p__Firmicutes;c__Bacilli;o__Bacillales;f__Thermoactinomycetaceae;g__Thermoactinomyces;s__Thermoactinomyces_sanguinis	0.9999716807365036
ASV_21325	d__Bacteria;p__Actinobacteria;c__Actinobacteria;o__Actinomycetales;f__Streptosporangiaceae;g__unclassified_Streptosporangiaceae;s__unclassified_Streptosporangiaceae	0.9999993038051764
ASV_12235	d__Bacteria;p__Firmicutes;c__Clostridia;o__Clostridiales;f__Ruminococcaceae;g__Oscillospira;s__unidentified_Oscillospira	0.8730606670529985
ASV_2060	d__Bacteria;p__Cyanobacteria;c__Chloroplast;o__Streptophyta;f__unidentified_Streptophyta;g__unidentified_Streptophyta;s__unidentified_Streptophyta	0.9999999998869669
ASV_8164	d__Bacteria;p__Firmicutes;c__Clostridia;o__Clostridiales;f__[Mogibacteriaceae];g__Anaerovorax;s__unidentified_Anaerovorax	0.9990815925275409
ASV_23920	d__Bacteria;p__Firmicutes;c__Clostridia;o__Clostridiales;f__Veillonellaceae;g__unclassified_Veillonellaceae;s__unclassified_Veillonellaceae	0.9999991864178505
ASV_18252	d__Bacteria;p__Firmicutes;c__Clostridia;o__SHA-98;f__unidentified_SHA-98;g__unidentified_SHA-98;s__unidentified_SHA-98	0.9980337953035091
ASV_22714	d__Bacteria;p__Firmicutes;c__Bacilli;o__Lactobacillales;f__Lactobacillaceae;g__Lactobacillus;s__unclassified_Lactobacillus	0.9999690839174663
ASV_14807	d__Bacteria;p__Firmicutes;c__Clostridia;o__Clostridiales;f__unidentified_Clostridiales;g__unidentified_Clostridiales;s__unidentified_Clostridiales	0.9998567626384252
ASV_1594	d__Bacteria;p__Bacteroidetes;c__Bacteroidia;o__Bacteroidales;f__S24-7;g__unidentified_S24-7;s__unidentified_S24-7	0.9999969146913787
ASV_18505	d__Bacteria;p__Firmicutes;c__Clostridia;o__Clostridiales;f__Ruminococcaceae;g__unidentified_Ruminococcaceae;s__unidentified_Ruminococcaceae	0.9703249212236622
ASV_23456	d__Bacteria;p__Bacteroidetes;c__Bacteroidia;o__Bacteroidales;f__unidentified_Bacteroidales;g__unidentified_Bacteroidales;s__unidentified_Bacteroidales	0.9995669655962213
ASV_1227	d__Bacteria;p__Bacteroidetes;c__Flavobacteriia;o__Flavobacteriales;f__Flavobacteriaceae;g__Flavobacterium;s__Flavobacterium_frigidarium	0.9980841838987843
ASV_22134	d__Bacteria;p__Proteobacteria;c__Alphaproteobacteria;o__Sphingomonadales;f__Sphingomonadaceae;g__Kaistobacter;s__unidentified_Kaistobacter	0.9970266725350129
ASV_25590	d__Bacteria;p__Proteobacteria;c__Alphaproteobacteria;o__Rhizobiales;f__Hyphomicrobiaceae;g__Hyphomicrobium;s__unidentified_Hyphomicrobium	0.9300265308329324
ASV_18630	d__Bacteria;p__Proteobacteria;c__Alphaproteobacteria;o__Rhodospirillales;f__Rhodospirillaceae;g__unidentified_Rhodospirillaceae;s__unidentified_Rhodospirillaceae	0.9926309231093586
ASV_5827	d__Bacteria;p__Firmicutes;c__Clostridia;o__Clostridiales;f__Ruminococcaceae;g__unidentified_Ruminococcaceae;s__unidentified_Ruminococcaceae	0.9580263342364791
ASV_8088	d__Bacteria;p__Firmicutes;c__Clostridia;o__Clostridiales;f__Clostridiaceae;g__Proteiniclasticum;s__unidentified_Proteiniclasticum	0.9998314828907074
ASV_7258	d__Bacteria;p__Actinobacteria;c__Actinobacteria;o__Actinomycetales;f__Intrasporangiaceae;g__unidentified_Intrasporangiaceae;s__unidentified_Intrasporangiaceae	0.9073849364526106
ASV_22619	d__Bacteria;p__Proteobacteria;c__Gammaproteobacteria;o__Xanthomonadales;f__Xanthomonadaceae;g__unclassified_Xanthomonadaceae;s__unclassified_Xanthomonadaceae	0.9999852445129672
ASV_1292	d__Bacteria;p__Actinobacteria;c__Actinobacteria;o__Actinomycetales;f__Thermomonosporaceae;g__Actinoallomurus;s__Actinoallomurus_iriomotensis	0.7926014725536941
ASV_8798	d__Bacteria;p__Firmicutes;c__Clostridia;o__Clostridiales;f__Christensenellaceae;g__unidentified_Christensenellaceae;s__unidentified_Christensenellaceae	0.9983889942473869
ASV_3229	d__Bacteria;p__Firmicutes;c__Clostridia;o__Clostridiales;f__Ruminococcaceae;g__unclassified_Ruminococcaceae;s__unclassified_Ruminococcaceae	0.9994694746112144
ASV_18294	d__Bacteria;p__Firmicutes;c__Clostridia;o__Clostridiales;f__Ruminococcaceae;g__unidentified_Ruminococcaceae;s__unidentified_Ruminococcaceae	0.9335219348746217
ASV_5320	d__Bacteria;p__Firmicutes;c__Clostridia;o__Clostridiales;f__Veillonellaceae;g__Anaeromusa;s__unidentified_Anaeromusa	0.9999999991530046
ASV_9779	d__Bacteria;p__Firmicutes;c__Clostridia;o__Clostridiales;f__unclassified_Clostridiales;g__unclassified_Clostridiales;s__unclassified_Clostridiales	0.9999999994275115
ASV_18385	d__Bacteria;p__Firmicutes;c__Clostridia;o__Clostridiales;f__unclassified_Clostridiales;g__unclassified_Clostridiales;s__unclassified_Clostridiales	0.9999999995075535
ASV_20778	d__Bacteria;p__Firmicutes;c__Clostridia;o__Clostridiales;f__unidentified_Clostridiales;g__unidentified_Clostridiales;s__unidentified_Clostridiales	0.9992806023894141
ASV_3806	d__Bacteria;p__Firmicutes;c__Clostridia;o__Clostridiales;f__unidentified_Clostridiales;g__unidentified_Clostridiales;s__unidentified_Clostridiales	0.9998743619959015
ASV_9324	d__Bacteria;p__Firmicutes;c__Clostridia;o__Clostridiales;f__Ruminococcaceae;g__Ruminococcus;s__unidentified_Ruminococcus	0.7122547742623255
ASV_19109	d__Bacteria;p__Firmicutes;c__Bacilli;o__Lactobacillales;f__Lactobacillaceae;g__Lactobacillus;s__unclassified_Lactobacillus	0.8374079295744056
ASV_11389	d__Bacteria;p__Firmicutes;c__Clostridia;o__Clostridiales;f__unclassified_Clostridiales;g__unclassified_Clostridiales;s__unclassified_Clostridiales	0.9999999991522214
ASV_1562	d__Bacteria;p__Actinobacteria;c__Actinobacteria;o__Actinomycetales;f__Mycobacteriaceae;g__Mycobacterium;s__unidentified_Mycobacterium	0.761578208816021
ASV_9498	d__Bacteria;p__Firmicutes;c__Clostridia;o__Clostridiales;f__Ruminococcaceae;g__Ruminococcus;s__Ruminococcus_callidus	0.9501674826164759
ASV_2185	d__Bacteria;p__Firmicutes;c__Clostridia;o__Clostridiales;f__unidentified_Clostridiales;g__unidentified_Clostridiales;s__unidentified_Clostridiales	0.9927586155348014
ASV_23322	d__Bacteria;p__Actinobacteria;c__Coriobacteriia;o__Coriobacteriales;f__Coriobacteriaceae;g__unidentified_Coriobacteriaceae;s__unidentified_Coriobacteriaceae	0.9994084817242735
ASV_21934	d__Bacteria;p__Proteobacteria;c__Betaproteobacteria;o__Burkholderiales;f__Burkholderiaceae;g__Pandoraea;s__unidentified_Pandoraea	0.9933260654005336
ASV_20133	d__Bacteria;p__Chloroflexi;c__Anaerolineae;o__Caldilineales;f__Caldilineaceae;g__Caldilinea;s__unidentified_Caldilinea	0.9991957895670078
ASV_1849	d__Bacteria;p__WPS-2;c__unidentified_WPS-2;o__unidentified_WPS-2;f__unidentified_WPS-2;g__unidentified_WPS-2;s__unidentified_WPS-2	0.9999356149964536
ASV_14877	d__Bacteria;p__Actinobacteria;c__Thermoleophilia;o__Gaiellales;f__unidentified_Gaiellales;g__unidentified_Gaiellales;s__unidentified_Gaiellales	0.9991162842676605
ASV_6663	d__Bacteria;p__Firmicutes;c__Clostridia;o__Clostridiales;f__unidentified_Clostridiales;g__unidentified_Clostridiales;s__unidentified_Clostridiales	0.9999784306031838
ASV_7503	d__Bacteria;p__Firmicutes;c__Clostridia;o__Clostridiales;f__Lachnospiraceae;g__Coprococcus;s__unidentified_Coprococcus	0.944442525603449
ASV_15739	d__Bacteria;p__Firmicutes;c__Clostridia;o__Clostridiales;f__[Mogibacteriaceae];g__unidentified_[Mogibacteriaceae];s__unidentified_[Mogibacteriaceae]	0.9999273747236618
ASV_11500	d__Bacteria;p__TM7;c__TM7-3;o__CW040;f__F16;g__unidentified_F16;s__unidentified_F16	0.999999593746847
ASV_13767	d__Bacteria;p__TM7;c__SC3;o__unidentified_SC3;f__unidentified_SC3;g__unidentified_SC3;s__unidentified_SC3	0.99999999999946
ASV_12402	d__Bacteria;p__Actinobacteria;c__Actinobacteria;o__Actinomycetales;f__Geodermatophilaceae;g__Geodermatophilus;s__unidentified_Geodermatophilus	0.9563025774529794
ASV_21507	d__Bacteria;p__Actinobacteria;c__Actinobacteria;o__Actinomycetales;f__Streptosporangiaceae;g__unclassified_Streptosporangiaceae;s__unclassified_Streptosporangiaceae	0.9999998108041699
ASV_1909	d__Bacteria;p__Firmicutes;c__Clostridia;o__Clostridiales;f__Christensenellaceae;g__unidentified_Christensenellaceae;s__unidentified_Christensenellaceae	0.8573695650638423
ASV_25155	d__Bacteria;p__Actinobacteria;c__Thermoleophilia;o__Solirubrobacterales;f__unidentified_Solirubrobacterales;g__unidentified_Solirubrobacterales;s__unidentified_Solirubrobacterales	0.9999999255423716
ASV_6016	d__Bacteria;p__Firmicutes;c__Clostridia;o__Clostridiales;f__Ruminococcaceae;g__Ruminococcus;s__unidentified_Ruminococcus	0.9888011398698234
ASV_5034	d__Bacteria;p__Firmicutes;c__Clostridia;o__Clostridiales;f__Lachnospiraceae;g__Dorea;s__unidentified_Dorea	0.995352840364298
ASV_14939	d__Bacteria;p__Proteobacteria;c__Gammaproteobacteria;o__Legionellales;f__unidentified_Legionellales;g__unidentified_Legionellales;s__unidentified_Legionellales	0.8777292921742454
ASV_23984	d__Bacteria;p__Firmicutes;c__Clostridia;o__Clostridiales;f__unidentified_Clostridiales;g__unidentified_Clostridiales;s__unidentified_Clostridiales	0.7372289561731116
ASV_20281	d__Bacteria;p__Actinobacteria;c__Actinobacteria;o__Actinomycetales;f__Propionibacteriaceae;g__Propionibacterium;s__Propionibacterium_acnes	0.9999262153949794
ASV_17452	d__Bacteria;p__Chloroflexi;c__TK17;o__mle1-48;f__unidentified_mle1-48;g__unidentified_mle1-48;s__unidentified_mle1-48	0.9999999917444882
ASV_10829	d__Bacteria;p__Firmicutes;c__Bacilli;o__Bacillales;f__Bacillaceae;g__Bacillus;s__Bacillus_muralis	0.982366006569353
ASV_20206	d__Bacteria;p__TM7;c__TM7-1;o__unidentified_TM7-1;f__unidentified_TM7-1;g__unidentified_TM7-1;s__unidentified_TM7-1	0.9999327245378592
ASV_7621	d__Bacteria;p__Actinobacteria;c__Actinobacteria;o__Actinomycetales;f__Geodermatophilaceae;g__unclassified_Geodermatophilaceae;s__unclassified_Geodermatophilaceae	0.9995658004382983
ASV_24996	d__Bacteria;p__Acidobacteria;c__Acidobacteriia;o__Acidobacteriales;f__Koribacteraceae;g__unidentified_Koribacteraceae;s__unidentified_Koribacteraceae	0.9999975690920154
ASV_22481	d__Bacteria;p__Proteobacteria;c__Betaproteobacteria;o__MND1;f__unidentified_MND1;g__unidentified_MND1;s__unidentified_MND1	0.9999996915946006
ASV_7528	d__Bacteria;p__Firmicutes;c__Clostridia;o__Clostridiales;f__Lachnospiraceae;g__[Ruminococcus];s__[Ruminococcus]_gnavus	0.9965405871145009
ASV_23091	d__Bacteria;p__Firmicutes;c__Clostridia;o__Clostridiales;f__Ruminococcaceae;g__Ruminococcus;s__unclassified_Ruminococcus	0.9982977070960095
ASV_14440	d__Bacteria;p__Proteobacteria;c__Alphaproteobacteria;o__Rhodospirillales;f__Rhodospirillaceae;g__unidentified_Rhodospirillaceae;s__unidentified_Rhodospirillaceae	0.9859887937844164
ASV_25995	d__Bacteria;p__Actinobacteria;c__Actinobacteria;o__Actinomycetales;f__Mycobacteriaceae;g__Mycobacterium;s__Mycobacterium_vaccae	0.9274712368813096
ASV_5995	d__Bacteria;p__Firmicutes;c__Clostridia;o__Clostridiales;f__unclassified_Clostridiales;g__unclassified_Clostridiales;s__unclassified_Clostridiales	0.9993473331992134
ASV_9567	d__Bacteria;p__Chloroflexi;c__Thermomicrobia;o__unidentified_Thermomicrobia;f__unidentified_Thermomicrobia;g__unidentified_Thermomicrobia;s__unidentified_Thermomicrobia	0.9999595964986842
ASV_17132	d__Bacteria;p__Bacteroidetes;c__Sphingobacteriia;o__Sphingobacteriales;f__Sphingobacteriaceae;g__unidentified_Sphingobacteriaceae;s__unidentified_Sphingobacteriaceae	0.9498769764778744
ASV_1829	d__Bacteria;p__Actinobacteria;c__Thermoleophilia;o__Gaiellales;f__Gaiellaceae;g__unidentified_Gaiellaceae;s__unidentified_Gaiellaceae	0.999767141810909
ASV_18273	d__Bacteria;p__Actinobacteria;c__Thermoleophilia;o__Gaiellales;f__Gaiellaceae;g__unidentified_Gaiellaceae;s__unidentified_Gaiellaceae	0.9998593735019876
ASV_19911	d__Bacteria;p__Firmicutes;c__Clostridia;o__Clostridiales;f__Peptostreptococcaceae;g__unclassified_Peptostreptococcaceae;s__unclassified_Peptostreptococcaceae	0.7109035017467619
ASV_23648	d__Bacteria;p__Actinobacteria;c__Actinobacteria;o__Actinomycetales;f__Intrasporangiaceae;g__Terracoccus;s__unidentified_Terracoccus	0.9902315623552299
ASV_19932	d__Bacteria;p__Firmicutes;c__Clostridia;o__Clostridiales;f__Ruminococcaceae;g__unidentified_Ruminococcaceae;s__unidentified_Ruminococcaceae	0.9995035062226119
ASV_13842	d__Bacteria;p__Actinobacteria;c__Thermoleophilia;o__Gaiellales;f__Gaiellaceae;g__unidentified_Gaiellaceae;s__unidentified_Gaiellaceae	0.997826119183062
ASV_4131	d__Bacteria;p__Firmicutes;c__Bacilli;o__Lactobacillales;f__Leuconostocaceae;g__Weissella;s__unclassified_Weissella	0.9473932440900623
ASV_13137	d__Bacteria;p__Actinobacteria;c__Thermoleophilia;o__Gaiellales;f__Gaiellaceae;g__unidentified_Gaiellaceae;s__unidentified_Gaiellaceae	0.99996245337403
ASV_11037	d__Bacteria;p__Acidobacteria;c__Acidobacteriia;o__Acidobacteriales;f__Koribacteraceae;g__Candidatus_Koribacter;s__unidentified_Candidatus_Koribacter	0.9888279726324944
ASV_1804	d__Bacteria;p__Bacteroidetes;c__Bacteroidia;o__Bacteroidales;f__unidentified_Bacteroidales;g__unidentified_Bacteroidales;s__unidentified_Bacteroidales	0.9999998527070029
ASV_1416	d__Bacteria;p__Bacteroidetes;c__Bacteroidia;o__Bacteroidales;f__S24-7;g__unidentified_S24-7;s__unidentified_S24-7	0.9999595504930725
ASV_26310	d__Bacteria;p__Proteobacteria;c__Alphaproteobacteria;o__Rhizobiales;f__unclassified_Rhizobiales;g__unclassified_Rhizobiales;s__unclassified_Rhizobiales	0.999866037497995
ASV_24690	d__Bacteria;p__Firmicutes;c__Clostridia;o__Clostridiales;f__unclassified_Clostridiales;g__unclassified_Clostridiales;s__unclassified_Clostridiales	0.999908040914991
ASV_14963	d__Bacteria;p__Spirochaetes;c__Spirochaetes;o__Spirochaetales;f__Spirochaetaceae;g__Treponema;s__unidentified_Treponema	0.9999974944876282
ASV_21826	d__Bacteria;p__Proteobacteria;c__Deltaproteobacteria;o__GMD14H09;f__unidentified_GMD14H09;g__unidentified_GMD14H09;s__unidentified_GMD14H09	0.9997100947055486
ASV_1704	d__Bacteria;p__Proteobacteria;c__Betaproteobacteria;o__Burkholderiales;f__Alcaligenaceae;g__Sutterella;s__unidentified_Sutterella	0.9999996261945073
ASV_12818	d__Bacteria;p__Proteobacteria;c__Alphaproteobacteria;o__Rhizobiales;f__Methylocystaceae;g__unidentified_Methylocystaceae;s__unidentified_Methylocystaceae	0.796812314351296
ASV_3233	d__Bacteria;p__Verrucomicrobia;c__Verruco-5;o__WCHB1-41;f__RFP12;g__unidentified_RFP12;s__unidentified_RFP12	0.9999999999989484
ASV_13233	d__Bacteria;p__Bacteroidetes;c__Bacteroidia;o__Bacteroidales;f__Porphyromonadaceae;g__Paludibacter;s__unidentified_Paludibacter	0.971714717696974
ASV_18833	d__Bacteria;p__Actinobacteria;c__Acidimicrobiia;o__Acidimicrobiales;f__EB1017;g__unidentified_EB1017;s__unidentified_EB1017	0.9999865344958846
ASV_13753	d__Bacteria;p__Firmicutes;c__Clostridia;o__Clostridiales;f__[Mogibacteriaceae];g__Anaerovorax;s__unidentified_Anaerovorax	0.9991523303560728
ASV_22215	d__Bacteria;p__Firmicutes;c__Clostridia;o__Clostridiales;f__Clostridiaceae;g__Clostridium;s__unidentified_Clostridium	0.9779893607365742
ASV_16142	d__Bacteria;p__Firmicutes;c__Clostridia;o__Clostridiales;f__Ruminococcaceae;g__unidentified_Ruminococcaceae;s__unidentified_Ruminococcaceae	0.8233060974663345
ASV_16797	d__Bacteria;p__Spirochaetes;c__Spirochaetes;o__Spirochaetales;f__Spirochaetaceae;g__Treponema;s__unidentified_Treponema	0.999857767369656
ASV_3275	d__Bacteria;p__unclassified_Bacteria;c__unclassified_Bacteria;o__unclassified_Bacteria;f__unclassified_Bacteria;g__unclassified_Bacteria;s__unclassified_Bacteria	0.9999999999744702
ASV_15270	d__Bacteria;p__Bacteroidetes;c__Flavobacteriia;o__Flavobacteriales;f__Flavobacteriaceae;g__Flavobacterium;s__unidentified_Flavobacterium	0.992031286213005
ASV_10043	d__Bacteria;p__Proteobacteria;c__Alphaproteobacteria;o__Rhodospirillales;f__Acetobacteraceae;g__unidentified_Acetobacteraceae;s__unidentified_Acetobacteraceae	0.8414481747836211
ASV_13095	d__Bacteria;p__Firmicutes;c__Clostridia;o__Clostridiales;f__Ruminococcaceae;g__unidentified_Ruminococcaceae;s__unidentified_Ruminococcaceae	0.9568030427487201
ASV_19928	d__Bacteria;p__Firmicutes;c__Clostridia;o__Clostridiales;f__unidentified_Clostridiales;g__unidentified_Clostridiales;s__unidentified_Clostridiales	0.9999431362170785
ASV_5449	d__Bacteria;p__Firmicutes;c__Bacilli;o__Bacillales;f__Sporolactobacillaceae;g__Pullulanibacillus;s__unidentified_Pullulanibacillus	0.9960472904546723
ASV_17241	d__Bacteria;p__Acidobacteria;c__Acidobacteria-6;o__iii1-15;f__mb2424;g__unidentified_mb2424;s__unidentified_mb2424	0.9999994496271065
ASV_18797	d__Bacteria;p__Chloroflexi;c__Thermomicrobia;o__JG30-KF-CM45;f__unidentified_JG30-KF-CM45;g__unidentified_JG30-KF-CM45;s__unidentified_JG30-KF-CM45	0.9999995824090339
ASV_25095	d__Bacteria;p__Actinobacteria;c__Actinobacteria;o__Actinomycetales;f__Micromonosporaceae;g__unclassified_Micromonosporaceae;s__unclassified_Micromonosporaceae	0.9997450160800405
ASV_25846	d__Bacteria;p__Proteobacteria;c__Gammaproteobacteria;o__Pseudomonadales;f__Moraxellaceae;g__Acinetobacter;s__unidentified_Acinetobacter	0.9124325181073916
ASV_25115	d__Bacteria;p__Firmicutes;c__Clostridia;o__Clostridiales;f__[Acidaminobacteraceae];g__Fusibacter;s__unidentified_Fusibacter	0.994800094593838
ASV_5537	d__Bacteria;p__Acidobacteria;c__Acidobacteriia;o__Acidobacteriales;f__Acidobacteriaceae;g__Edaphobacter;s__unidentified_Edaphobacter	0.7663969077507164
ASV_11056	d__Bacteria;p__Firmicutes;c__Clostridia;o__Clostridiales;f__Lachnospiraceae;g__Coprococcus;s__unidentified_Coprococcus	0.9584782814989573
ASV_5513	d__Bacteria;p__Actinobacteria;c__Actinobacteria;o__Actinomycetales;f__Pseudonocardiaceae;g__Pseudonocardia;s__unclassified_Pseudonocardia	0.9995580317661443
ASV_18487	d__Bacteria;p__Actinobacteria;c__Actinobacteria;o__Actinomycetales;f__Pseudonocardiaceae;g__Pseudonocardia;s__unclassified_Pseudonocardia	0.9997102782877988
ASV_16613	d__Bacteria;p__Proteobacteria;c__Alphaproteobacteria;o__Rhizobiales;f__Methylobacteriaceae;g__unclassified_Methylobacteriaceae;s__unclassified_Methylobacteriaceae	0.9999966052899423
ASV_1229	d__Bacteria;p__Actinobacteria;c__Acidimicrobiia;o__Acidimicrobiales;f__EB1017;g__unidentified_EB1017;s__unidentified_EB1017	0.9999521743433426
ASV_796	d__Bacteria;p__Actinobacteria;c__Thermoleophilia;o__Solirubrobacterales;f__Patulibacteraceae;g__unidentified_Patulibacteraceae;s__unidentified_Patulibacteraceae	0.7237920744662877
ASV_11999	d__Bacteria;p__Firmicutes;c__Clostridia;o__Clostridiales;f__Ruminococcaceae;g__unidentified_Ruminococcaceae;s__unidentified_Ruminococcaceae	0.9991675298678591
ASV_17334	d__Bacteria;p__Actinobacteria;c__Thermoleophilia;o__Solirubrobacterales;f__unidentified_Solirubrobacterales;g__unidentified_Solirubrobacterales;s__unidentified_Solirubrobacterales	0.9309191423363379
ASV_5635	d__Bacteria;p__Firmicutes;c__Clostridia;o__Clostridiales;f__Ruminococcaceae;g__unidentified_Ruminococcaceae;s__unidentified_Ruminococcaceae	0.9726610075550922
ASV_16956	d__Bacteria;p__Firmicutes;c__Clostridia;o__Clostridiales;f__Ruminococcaceae;g__Oscillospira;s__unidentified_Oscillospira	0.9936047518901493
ASV_19449	d__Bacteria;p__Firmicutes;c__Clostridia;o__Clostridiales;f__Ruminococcaceae;g__unidentified_Ruminococcaceae;s__unidentified_Ruminococcaceae	0.9993110430342619
ASV_4444	d__Bacteria;p__Firmicutes;c__Clostridia;o__Clostridiales;f__Lachnospiraceae;g__unclassified_Lachnospiraceae;s__unclassified_Lachnospiraceae	0.9035708049644834
ASV_20710	d__Bacteria;p__Firmicutes;c__Clostridia;o__Clostridiales;f__Ruminococcaceae;g__unidentified_Ruminococcaceae;s__unidentified_Ruminococcaceae	0.9980564455061076
ASV_15816	d__Bacteria;p__Actinobacteria;c__Actinobacteria;o__Actinomycetales;f__Micromonosporaceae;g__unclassified_Micromonosporaceae;s__unclassified_Micromonosporaceae	0.9998066804093007
ASV_6950	d__Bacteria;p__Actinobacteria;c__Coriobacteriia;o__Coriobacteriales;f__Coriobacteriaceae;g__Adlercreutzia;s__unidentified_Adlercreutzia	0.9620810284401168
ASV_23708	d__Bacteria;p__Proteobacteria;c__Betaproteobacteria;o__Burkholderiales;f__Comamonadaceae;g__unclassified_Comamonadaceae;s__unclassified_Comamonadaceae	0.9999880546577453
ASV_10246	d__Bacteria;p__Firmicutes;c__Bacilli;o__Lactobacillales;f__Lactobacillaceae;g__Lactobacillus;s__unidentified_Lactobacillus	0.9986980062970022
ASV_7488	d__Bacteria;p__Firmicutes;c__Clostridia;o__Clostridiales;f__Veillonellaceae;g__Anaerovibrio;s__unidentified_Anaerovibrio	0.9996923072325817
ASV_22130	d__Bacteria;p__Proteobacteria;c__Alphaproteobacteria;o__Ellin329;f__unidentified_Ellin329;g__unidentified_Ellin329;s__unidentified_Ellin329	0.9999999093867912
ASV_12954	d__Bacteria;p__Chloroflexi;c__Thermomicrobia;o__unidentified_Thermomicrobia;f__unidentified_Thermomicrobia;g__unidentified_Thermomicrobia;s__unidentified_Thermomicrobia	0.9996826133365033
ASV_19788	d__Bacteria;p__Firmicutes;c__Bacilli;o__Bacillales;f__Paenibacillaceae;g__Cohnella;s__unidentified_Cohnella	0.9999604326246939
ASV_21665	d__Bacteria;p__TM7;c__TM7-1;o__unidentified_TM7-1;f__unidentified_TM7-1;g__unidentified_TM7-1;s__unidentified_TM7-1	0.9999968217725752
ASV_14077	d__Bacteria;p__Bacteroidetes;c__Bacteroidia;o__Bacteroidales;f__Prevotellaceae;g__Prevotella;s__Prevotella_copri	0.9900662099141772
ASV_12110	d__Bacteria;p__Proteobacteria;c__Alphaproteobacteria;o__Rhizobiales;f__Beijerinckiaceae;g__Beijerinckia;s__unidentified_Beijerinckia	0.8160074300187197
ASV_3609	d__Bacteria;p__Actinobacteria;c__Thermoleophilia;o__Solirubrobacterales;f__unidentified_Solirubrobacterales;g__unidentified_Solirubrobacterales;s__unidentified_Solirubrobacterales	0.9953245006190349
ASV_25778	d__Bacteria;p__Bacteroidetes;c__Flavobacteriia;o__Flavobacteriales;f__Flavobacteriaceae;g__Flavobacterium;s__Flavobacterium_frigidarium	0.9925503039340512
ASV_6755	d__Bacteria;p__Proteobacteria;c__Betaproteobacteria;o__unclassified_Betaproteobacteria;f__unclassified_Betaproteobacteria;g__unclassified_Betaproteobacteria;s__unclassified_Betaproteobacteria	0.9999695403400815
ASV_5052	d__Bacteria;p__Cyanobacteria;c__Chloroplast;o__Streptophyta;f__unidentified_Streptophyta;g__unidentified_Streptophyta;s__unidentified_Streptophyta	0.9999999964703647
ASV_7997	d__Bacteria;p__Firmicutes;c__Erysipelotrichi;o__Erysipelotrichales;f__Erysipelotrichaceae;g__unidentified_Erysipelotrichaceae;s__unidentified_Erysipelotrichaceae	0.9996824962802956
ASV_16584	d__Bacteria;p__Bacteroidetes;c__Bacteroidia;o__Bacteroidales;f__Rikenellaceae;g__Alistipes;s__Alistipes_finegoldii	0.9907430420249052
ASV_20981	d__Bacteria;p__Proteobacteria;c__Gammaproteobacteria;o__Legionellales;f__unidentified_Legionellales;g__unidentified_Legionellales;s__unidentified_Legionellales	0.9914977478062151
ASV_14736	d__Bacteria;p__Firmicutes;c__Clostridia;o__Clostridiales;f__Ruminococcaceae;g__Oscillospira;s__unidentified_Oscillospira	0.9999167634918533
ASV_1775	d__Bacteria;p__Proteobacteria;c__Betaproteobacteria;o__Burkholderiales;f__Comamonadaceae;g__Pelomonas;s__Pelomonas_puraquae	0.7969825267891287
ASV_23867	d__Bacteria;p__Firmicutes;c__Clostridia;o__Clostridiales;f__Ruminococcaceae;g__Oscillospira;s__unidentified_Oscillospira	0.9926937694733731
ASV_24024	d__Bacteria;p__unclassified_Bacteria;c__unclassified_Bacteria;o__unclassified_Bacteria;f__unclassified_Bacteria;g__unclassified_Bacteria;s__unclassified_Bacteria	0.999999999390299
ASV_8562	d__Bacteria;p__Proteobacteria;c__Gammaproteobacteria;o__Xanthomonadales;f__Xanthomonadaceae;g__unidentified_Xanthomonadaceae;s__unidentified_Xanthomonadaceae	0.9729929984980862
ASV_7842	d__Bacteria;p__Cyanobacteria;c__4C0d-2;o__YS2;f__unidentified_YS2;g__unidentified_YS2;s__unidentified_YS2	0.9999999841646457
ASV_20361	d__Bacteria;p__Proteobacteria;c__Betaproteobacteria;o__Burkholderiales;f__Burkholderiaceae;g__Burkholderia;s__unclassified_Burkholderia	0.9582244351528484
ASV_6477	d__Bacteria;p__Proteobacteria;c__Betaproteobacteria;o__Burkholderiales;f__Burkholderiaceae;g__Burkholderia;s__Burkholderia_bryophila	0.9145533040034509
ASV_12919	d__Bacteria;p__Firmicutes;c__Clostridia;o__Clostridiales;f__[Mogibacteriaceae];g__unidentified_[Mogibacteriaceae];s__unidentified_[Mogibacteriaceae]	0.9999508916812141
ASV_1721	d__Bacteria;p__Proteobacteria;c__Gammaproteobacteria;o__Pseudomonadales;f__Moraxellaceae;g__Acinetobacter;s__Acinetobacter_lwoffii	0.7704043166415653
ASV_25872	d__Bacteria;p__Firmicutes;c__Clostridia;o__Clostridiales;f__unclassified_Clostridiales;g__unclassified_Clostridiales;s__unclassified_Clostridiales	0.999209806490138
ASV_7635	d__Bacteria;p__Proteobacteria;c__Alphaproteobacteria;o__Rhizobiales;f__Hyphomicrobiaceae;g__Rhodoplanes;s__unidentified_Rhodoplanes	0.9999833697183778
ASV_23020	d__Bacteria;p__Cyanobacteria;c__4C0d-2;o__YS2;f__unidentified_YS2;g__unidentified_YS2;s__unidentified_YS2	0.9999999999972715
ASV_15754	d__Bacteria;p__Firmicutes;c__Clostridia;o__Clostridiales;f__unidentified_Clostridiales;g__unidentified_Clostridiales;s__unidentified_Clostridiales	0.9458892586085246
ASV_9393	d__Bacteria;p__Firmicutes;c__Clostridia;o__Clostridiales;f__Ruminococcaceae;g__unidentified_Ruminococcaceae;s__unidentified_Ruminococcaceae	0.9701940201717036
ASV_8413	d__Bacteria;p__Firmicutes;c__Bacilli;o__Turicibacterales;f__Turicibacteraceae;g__Turicibacter;s__unidentified_Turicibacter	0.9999999888089804
ASV_15717	d__Bacteria;p__Gemmatimonadetes;c__Gemm-3;o__unidentified_Gemm-3;f__unidentified_Gemm-3;g__unidentified_Gemm-3;s__unidentified_Gemm-3	0.9999997420840763
ASV_23251	d__Bacteria;p__Firmicutes;c__Clostridia;o__Clostridiales;f__unclassified_Clostridiales;g__unclassified_Clostridiales;s__unclassified_Clostridiales	0.9999999902428811
ASV_4282	d__Bacteria;p__Actinobacteria;c__Thermoleophilia;o__Gaiellales;f__Gaiellaceae;g__unidentified_Gaiellaceae;s__unidentified_Gaiellaceae	0.9249890224161099
ASV_21228	d__Bacteria;p__Proteobacteria;c__Betaproteobacteria;o__Burkholderiales;f__Comamonadaceae;g__unclassified_Comamonadaceae;s__unclassified_Comamonadaceae	0.9999988189559381
ASV_1297	d__Bacteria;p__Tenericutes;c__Mollicutes;o__RF39;f__unidentified_RF39;g__unidentified_RF39;s__unidentified_RF39	0.9999999217479316
ASV_6430	d__Bacteria;p__Chloroflexi;c__Anaerolineae;o__SBR1031;f__A4b;g__unidentified_A4b;s__unidentified_A4b	0.9999984205006709
ASV_13974	d__Bacteria;p__Actinobacteria;c__Actinobacteria;o__Actinomycetales;f__Geodermatophilaceae;g__unclassified_Geodermatophilaceae;s__unclassified_Geodermatophilaceae	0.9385520062444132
ASV_20736	d__Bacteria;p__Actinobacteria;c__Actinobacteria;o__Actinomycetales;f__Nocardioidaceae;g__Nocardioides;s__unidentified_Nocardioides	0.980701012432439
ASV_19035	d__Bacteria;p__Firmicutes;c__Clostridia;o__Clostridiales;f__Peptostreptococcaceae;g__Tepidibacter;s__unidentified_Tepidibacter	0.9221128432726422
ASV_19925	d__Bacteria;p__Chloroflexi;c__Ellin6529;o__unidentified_Ellin6529;f__unidentified_Ellin6529;g__unidentified_Ellin6529;s__unidentified_Ellin6529	0.999999999719762
ASV_16401	d__Bacteria;p__Firmicutes;c__Clostridia;o__Clostridiales;f__Ruminococcaceae;g__Oscillospira;s__unidentified_Oscillospira	0.9983498161639001
ASV_11256	d__Bacteria;p__Firmicutes;c__Clostridia;o__Clostridiales;f__Christensenellaceae;g__unidentified_Christensenellaceae;s__unidentified_Christensenellaceae	0.7656446369584523
ASV_21277	d__Bacteria;p__Cyanobacteria;c__4C0d-2;o__YS2;f__unidentified_YS2;g__unidentified_YS2;s__unidentified_YS2	0.9999999999987494
ASV_10485	d__Bacteria;p__Firmicutes;c__Clostridia;o__Clostridiales;f__Ruminococcaceae;g__unidentified_Ruminococcaceae;s__unidentified_Ruminococcaceae	0.9734694927549683
ASV_327	d__Bacteria;p__Actinobacteria;c__Actinobacteria;o__Actinomycetales;f__Frankiaceae;g__unidentified_Frankiaceae;s__unidentified_Frankiaceae	0.9973723393379
ASV_16420	d__Bacteria;p__Firmicutes;c__Clostridia;o__Clostridiales;f__unidentified_Clostridiales;g__unidentified_Clostridiales;s__unidentified_Clostridiales	0.809570620296288
ASV_2923	d__Bacteria;p__Firmicutes;c__Bacilli;o__Bacillales;f__Planococcaceae;g__unclassified_Planococcaceae;s__unclassified_Planococcaceae	0.7076380494724303
ASV_156	d__Bacteria;p__Bacteroidetes;c__Bacteroidia;o__Bacteroidales;f__S24-7;g__unidentified_S24-7;s__unidentified_S24-7	0.9999726291767
ASV_23480	d__Bacteria;p__Proteobacteria;c__Gammaproteobacteria;o__Xanthomonadales;f__Xanthomonadaceae;g__unclassified_Xanthomonadaceae;s__unclassified_Xanthomonadaceae	0.9370271794313138
ASV_26352	d__Bacteria;p__Proteobacteria;c__Betaproteobacteria;o__Burkholderiales;f__Comamonadaceae;g__unclassified_Comamonadaceae;s__unclassified_Comamonadaceae	0.9999926186429503
ASV_9612	d__Bacteria;p__Actinobacteria;c__Actinobacteria;o__Micrococcales;f__unidentified_Micrococcales;g__unidentified_Micrococcales;s__unidentified_Micrococcales	0.9999999661584132
ASV_16746	d__Bacteria;p__TM7;c__TM7-3;o__unidentified_TM7-3;f__unidentified_TM7-3;g__unidentified_TM7-3;s__unidentified_TM7-3	0.9993842953257976
ASV_10300	d__Bacteria;p__Actinobacteria;c__Actinobacteria;o__Actinomycetales;f__Thermomonosporaceae;g__Actinoallomurus;s__unclassified_Actinoallomurus	0.9999940508468379
ASV_20050	d__Bacteria;p__Proteobacteria;c__Betaproteobacteria;o__Ellin6067;f__unidentified_Ellin6067;g__unidentified_Ellin6067;s__unidentified_Ellin6067	0.9999985966940882
ASV_6785	d__Bacteria;p__Firmicutes;c__Clostridia;o__Clostridiales;f__Christensenellaceae;g__unidentified_Christensenellaceae;s__unidentified_Christensenellaceae	0.9999376144819736
ASV_9481	d__Bacteria;p__Planctomycetes;c__Planctomycetia;o__Gemmatales;f__Isosphaeraceae;g__unidentified_Isosphaeraceae;s__unidentified_Isosphaeraceae	0.9985864082241981
ASV_3669	d__Bacteria;p__Bacteroidetes;c__Bacteroidia;o__Bacteroidales;f__S24-7;g__unidentified_S24-7;s__unidentified_S24-7	0.9999985283846541
ASV_9357	d__Bacteria;p__Tenericutes;c__Mollicutes;o__RF39;f__unidentified_RF39;g__unidentified_RF39;s__unidentified_RF39	0.9999999996309725
ASV_23297	d__Bacteria;p__Firmicutes;c__Erysipelotrichi;o__Erysipelotrichales;f__Erysipelotrichaceae;g__Allobaculum;s__unidentified_Allobaculum	0.9999746410552832
ASV_22474	d__Bacteria;p__Firmicutes;c__Clostridia;o__Clostridiales;f__Lachnospiraceae;g__unidentified_Lachnospiraceae;s__unidentified_Lachnospiraceae	0.9106945826146294
ASV_697	d__Bacteria;p__Firmicutes;c__Clostridia;o__Clostridiales;f__Veillonellaceae;g__Megasphaera;s__unidentified_Megasphaera	0.9999999767393322
ASV_13297	d__Bacteria;p__Proteobacteria;c__Gammaproteobacteria;o__Legionellales;f__unidentified_Legionellales;g__unidentified_Legionellales;s__unidentified_Legionellales	0.996812648678378
ASV_9954	d__Bacteria;p__Proteobacteria;c__Alphaproteobacteria;o__Caulobacterales;f__Caulobacteraceae;g__Brevundimonas;s__unclassified_Brevundimonas	0.94306180803252
ASV_1590	d__Bacteria;p__Firmicutes;c__Clostridia;o__Clostridiales;f__Ruminococcaceae;g__unidentified_Ruminococcaceae;s__unidentified_Ruminococcaceae	0.9992590021434365
ASV_2510	d__Bacteria;p__Actinobacteria;c__Thermoleophilia;o__Gaiellales;f__Gaiellaceae;g__unidentified_Gaiellaceae;s__unidentified_Gaiellaceae	0.9996322751350266
ASV_25558	d__Bacteria;p__Proteobacteria;c__Alphaproteobacteria;o__Rhodospirillales;f__Acetobacteraceae;g__unidentified_Acetobacteraceae;s__unidentified_Acetobacteraceae	0.9982718381814654
ASV_827	d__Bacteria;p__Proteobacteria;c__Alphaproteobacteria;o__Ellin329;f__unidentified_Ellin329;g__unidentified_Ellin329;s__unidentified_Ellin329	0.9999998015680288
ASV_16894	d__Bacteria;p__Firmicutes;c__Bacilli;o__Bacillales;f__Bacillaceae;g__Bacillus;s__unidentified_Bacillus	0.9071868137152282
ASV_13154	d__Bacteria;p__unidentified_Bacteria;c__unidentified_Bacteria;o__unidentified_Bacteria;f__unidentified_Bacteria;g__unidentified_Bacteria;s__unidentified_Bacteria	0.836892727898768
ASV_17356	d__Bacteria;p__TM7;c__TM7-3;o__EW055;f__unidentified_EW055;g__unidentified_EW055;s__unidentified_EW055	0.9710091173040883
ASV_6040	d__Bacteria;p__Proteobacteria;c__Gammaproteobacteria;o__Pseudomonadales;f__Moraxellaceae;g__Psychrobacter;s__Psychrobacter_marincola	0.9526821709255671
ASV_16131	d__Bacteria;p__Firmicutes;c__Bacilli;o__Bacillales;f__unclassified_Bacillales;g__unclassified_Bacillales;s__unclassified_Bacillales	0.9840070443979884
ASV_11232	d__Bacteria;p__Firmicutes;c__Clostridia;o__Clostridiales;f__Lachnospiraceae;g__unidentified_Lachnospiraceae;s__unidentified_Lachnospiraceae	0.9681665765733694
ASV_18337	d__Bacteria;p__Actinobacteria;c__Actinobacteria;o__Actinomycetales;f__Actinospicaceae;g__unidentified_Actinospicaceae;s__unidentified_Actinospicaceae	0.8230706834285431
ASV_3599	d__Bacteria;p__Firmicutes;c__Clostridia;o__Clostridiales;f__Ruminococcaceae;g__unidentified_Ruminococcaceae;s__unidentified_Ruminococcaceae	0.9998524536373827
ASV_11047	d__Bacteria;p__Actinobacteria;c__Thermoleophilia;o__Solirubrobacterales;f__unidentified_Solirubrobacterales;g__unidentified_Solirubrobacterales;s__unidentified_Solirubrobacterales	0.9997708233891434
ASV_15587	d__Bacteria;p__Actinobacteria;c__Thermoleophilia;o__Gaiellales;f__Gaiellaceae;g__unidentified_Gaiellaceae;s__unidentified_Gaiellaceae	0.9995654905431821
ASV_21152	d__Bacteria;p__Acidobacteria;c__Acidobacteriia;o__Acidobacteriales;f__Acidobacteriaceae;g__unidentified_Acidobacteriaceae;s__unidentified_Acidobacteriaceae	0.9993194141148795
ASV_6627	d__Bacteria;p__Firmicutes;c__Clostridia;o__Clostridiales;f__Lachnospiraceae;g__unidentified_Lachnospiraceae;s__unidentified_Lachnospiraceae	0.8342797316648566
ASV_18617	d__Bacteria;p__Chloroflexi;c__Ellin6529;o__unidentified_Ellin6529;f__unidentified_Ellin6529;g__unidentified_Ellin6529;s__unidentified_Ellin6529	0.999999999679801
ASV_25152	d__Bacteria;p__Proteobacteria;c__Alphaproteobacteria;o__Sphingomonadales;f__Sphingomonadaceae;g__Kaistobacter;s__unidentified_Kaistobacter	0.996225450981264
ASV_2458	d__Bacteria;p__Firmicutes;c__Clostridia;o__Clostridiales;f__unclassified_Clostridiales;g__unclassified_Clostridiales;s__unclassified_Clostridiales	0.9991074146400181
ASV_14291	d__Bacteria;p__Actinobacteria;c__Thermoleophilia;o__Gaiellales;f__Gaiellaceae;g__unidentified_Gaiellaceae;s__unidentified_Gaiellaceae	0.9999431152682585
ASV_14451	d__Bacteria;p__TM7;c__TM7-1;o__unidentified_TM7-1;f__unidentified_TM7-1;g__unidentified_TM7-1;s__unidentified_TM7-1	0.9999973797934779
ASV_2203	d__Bacteria;p__Actinobacteria;c__Actinobacteria;o__Actinomycetales;f__Micromonosporaceae;g__unclassified_Micromonosporaceae;s__unclassified_Micromonosporaceae	0.9999809175971364
ASV_5473	d__Bacteria;p__Firmicutes;c__Clostridia;o__Clostridiales;f__Lachnospiraceae;g__unidentified_Lachnospiraceae;s__unidentified_Lachnospiraceae	0.9171236013870011
ASV_7277	d__Bacteria;p__Actinobacteria;c__Actinobacteria;o__Actinomycetales;f__Geodermatophilaceae;g__unidentified_Geodermatophilaceae;s__unidentified_Geodermatophilaceae	0.8767217608765795
ASV_24420	d__Bacteria;p__Proteobacteria;c__Gammaproteobacteria;o__Pseudomonadales;f__Pseudomonadaceae;g__Pseudomonas;s__Pseudomonas_stutzeri	0.9077126093187149
ASV_776	d__Bacteria;p__Firmicutes;c__Clostridia;o__Clostridiales;f__unidentified_Clostridiales;g__unidentified_Clostridiales;s__unidentified_Clostridiales	0.883163063633803
ASV_232	d__Bacteria;p__Proteobacteria;c__Alphaproteobacteria;o__Rhodospirillales;f__Acetobacteraceae;g__Roseomonas;s__unidentified_Roseomonas	0.999902629891814
ASV_3740	d__Bacteria;p__Proteobacteria;c__Alphaproteobacteria;o__Rhodospirillales;f__Rhodospirillaceae;g__unidentified_Rhodospirillaceae;s__unidentified_Rhodospirillaceae	0.9951578579393995
ASV_20522	d__Bacteria;p__Verrucomicrobia;c__[Spartobacteria];o__[Chthoniobacterales];f__[Chthoniobacteraceae];g__Candidatus_Xiphinematobacter;s__unidentified_Candidatus_Xiphinematobacter	0.9999999329872389
ASV_12775	d__Bacteria;p__Actinobacteria;c__Actinobacteria;o__Actinomycetales;f__Pseudonocardiaceae;g__Pseudonocardia;s__unidentified_Pseudonocardia	0.8631006597241012
ASV_17699	d__Bacteria;p__Acidobacteria;c__Solibacteres;o__Solibacterales;f__unidentified_Solibacterales;g__unidentified_Solibacterales;s__unidentified_Solibacterales	0.9999835548405185
ASV_13020	d__Bacteria;p__Gemmatimonadetes;c__Gemm-1;o__unidentified_Gemm-1;f__unidentified_Gemm-1;g__unidentified_Gemm-1;s__unidentified_Gemm-1	0.9999999997760654
ASV_19752	d__Bacteria;p__Proteobacteria;c__Betaproteobacteria;o__SC-I-84;f__unidentified_SC-I-84;g__unidentified_SC-I-84;s__unidentified_SC-I-84	0.9979944438496843
ASV_5433	d__Bacteria;p__Bacteroidetes;c__Bacteroidia;o__Bacteroidales;f__S24-7;g__unidentified_S24-7;s__unidentified_S24-7	0.9999995638327263
ASV_20637	d__Bacteria;p__Firmicutes;c__Clostridia;o__Clostridiales;f__Ruminococcaceae;g__Ruminococcus;s__Ruminococcus_bromii	0.8081182607662003
ASV_24429	d__Bacteria;p__Firmicutes;c__Bacilli;o__Bacillales;f__Bacillaceae;g__Bacillus;s__Bacillus_thermoamylovorans	0.9998055591368424
ASV_8553	d__Bacteria;p__Proteobacteria;c__Alphaproteobacteria;o__Caulobacterales;f__Caulobacteraceae;g__Phenylobacterium;s__unidentified_Phenylobacterium	0.9988346318772106
ASV_14136	d__Bacteria;p__Proteobacteria;c__Epsilonproteobacteria;o__Campylobacterales;f__Campylobacteraceae;g__Arcobacter;s__unidentified_Arcobacter	0.9999698541531532
ASV_3046	d__Bacteria;p__Firmicutes;c__Clostridia;o__Clostridiales;f__Clostridiaceae;g__SMB53;s__unidentified_SMB53	0.9219611720802681
ASV_2379	d__Bacteria;p__Firmicutes;c__Clostridia;o__Clostridiales;f__unclassified_Clostridiales;g__unclassified_Clostridiales;s__unclassified_Clostridiales	0.9999999991491975
ASV_17998	d__Bacteria;p__Proteobacteria;c__Gammaproteobacteria;o__Xanthomonadales;f__Xanthomonadaceae;g__Rhodanobacter;s__unclassified_Rhodanobacter	0.9996095448284709
ASV_16554	d__Bacteria;p__Bacteroidetes;c__[Saprospirae];o__[Saprospirales];f__Chitinophagaceae;g__unidentified_Chitinophagaceae;s__unidentified_Chitinophagaceae	0.9983531560451201
ASV_4785	d__Bacteria;p__Actinobacteria;c__Actinobacteria;o__Actinomycetales;f__Nocardioidaceae;g__unidentified_Nocardioidaceae;s__unidentified_Nocardioidaceae	0.9286148827692031
ASV_1940	d__Bacteria;p__Proteobacteria;c__Alphaproteobacteria;o__Rhodospirillales;f__Rhodospirillaceae;g__unidentified_Rhodospirillaceae;s__unidentified_Rhodospirillaceae	0.9883144567872073
ASV_21875	d__Bacteria;p__Actinobacteria;c__Thermoleophilia;o__Solirubrobacterales;f__unidentified_Solirubrobacterales;g__unidentified_Solirubrobacterales;s__unidentified_Solirubrobacterales	0.9999998805769295
ASV_16557	d__Bacteria;p__Firmicutes;c__Clostridia;o__Clostridiales;f__Clostridiaceae;g__Proteiniclasticum;s__unidentified_Proteiniclasticum	0.9999962831582546
ASV_9271	d__Bacteria;p__Firmicutes;c__Clostridia;o__Clostridiales;f__Lachnospiraceae;g__unclassified_Lachnospiraceae;s__unclassified_Lachnospiraceae	0.8375188040749867
ASV_6916	d__Bacteria;p__Chloroflexi;c__TK10;o__B07_WMSP1;f__FFCH4570;g__unidentified_FFCH4570;s__unidentified_FFCH4570	0.7456680584193568
ASV_12596	d__Bacteria;p__Firmicutes;c__Bacilli;o__Lactobacillales;f__Lactobacillaceae;g__Lactobacillus;s__unclassified_Lactobacillus	0.8815065345118495
ASV_25695	d__Bacteria;p__Bacteroidetes;c__Bacteroidia;o__Bacteroidales;f__unidentified_Bacteroidales;g__unidentified_Bacteroidales;s__unidentified_Bacteroidales	0.9999994567471956
ASV_18059	d__Bacteria;p__Firmicutes;c__Clostridia;o__Clostridiales;f__Ruminococcaceae;g__Oscillospira;s__unidentified_Oscillospira	0.9978002563287607
ASV_12436	d__Bacteria;p__Firmicutes;c__Clostridia;o__Clostridiales;f__Ruminococcaceae;g__Oscillospira;s__unidentified_Oscillospira	0.998554332589656
ASV_21393	d__Bacteria;p__Cyanobacteria;c__4C0d-2;o__YS2;f__unidentified_YS2;g__unidentified_YS2;s__unidentified_YS2	0.9999999998095745
ASV_11544	d__Bacteria;p__Firmicutes;c__Clostridia;o__Clostridiales;f__Ruminococcaceae;g__Oscillospira;s__unidentified_Oscillospira	0.9986998773994892
ASV_16693	d__Bacteria;p__Actinobacteria;c__Actinobacteria;o__Actinomycetales;f__Streptomycetaceae;g__Streptomyces;s__unclassified_Streptomyces	0.9527445537837254
ASV_15491	d__Bacteria;p__Proteobacteria;c__Deltaproteobacteria;o__Syntrophobacterales;f__Syntrophobacteraceae;g__unidentified_Syntrophobacteraceae;s__unidentified_Syntrophobacteraceae	0.9999828659091953
ASV_10808	d__Bacteria;p__Proteobacteria;c__Gammaproteobacteria;o__Pseudomonadales;f__Moraxellaceae;g__Acinetobacter;s__unclassified_Acinetobacter	0.9999835129195972
ASV_6330	d__Bacteria;p__Firmicutes;c__Clostridia;o__Clostridiales;f__Lachnospiraceae;g__unidentified_Lachnospiraceae;s__unidentified_Lachnospiraceae	0.9524625805069115
ASV_24799	d__Bacteria;p__Firmicutes;c__Clostridia;o__Clostridiales;f__unidentified_Clostridiales;g__unidentified_Clostridiales;s__unidentified_Clostridiales	0.8004169806687902
ASV_25928	d__Bacteria;p__Proteobacteria;c__Deltaproteobacteria;o__Desulfovibrionales;f__Desulfovibrionaceae;g__Desulfovibrio;s__unidentified_Desulfovibrio	0.767173577248014
ASV_19140	d__Bacteria;p__Gemmatimonadetes;c__Gemmatimonadetes;o__N1423WL;f__unidentified_N1423WL;g__unidentified_N1423WL;s__unidentified_N1423WL	0.9999971861471492
ASV_24161	d__Bacteria;p__Chloroflexi;c__TK17;o__unidentified_TK17;f__unidentified_TK17;g__unidentified_TK17;s__unidentified_TK17	0.9909059282824753
ASV_18666	d__Bacteria;p__Proteobacteria;c__Betaproteobacteria;o__Burkholderiales;f__Oxalobacteraceae;g__Herbaspirillum;s__unclassified_Herbaspirillum	0.7779990243371019
ASV_3277	d__Bacteria;p__Actinobacteria;c__Actinobacteria;o__Actinomycetales;f__Microbacteriaceae;g__unclassified_Microbacteriaceae;s__unclassified_Microbacteriaceae	0.9994609635732409
ASV_5566	d__Bacteria;p__Actinobacteria;c__Actinobacteria;o__Actinomycetales;f__Micromonosporaceae;g__unclassified_Micromonosporaceae;s__unclassified_Micromonosporaceae	0.9990146238149509
ASV_10372	d__Bacteria;p__Proteobacteria;c__Alphaproteobacteria;o__Rhodospirillales;f__Rhodospirillaceae;g__unidentified_Rhodospirillaceae;s__unidentified_Rhodospirillaceae	0.9935795795795233
ASV_3709	d__Bacteria;p__Firmicutes;c__Clostridia;o__Clostridiales;f__Veillonellaceae;g__unclassified_Veillonellaceae;s__unclassified_Veillonellaceae	0.9999999877333189
ASV_10298	d__Bacteria;p__Firmicutes;c__Bacilli;o__Bacillales;f__Planococcaceae;g__Sporosarcina;s__unidentified_Sporosarcina	0.8252147062460127
ASV_18149	d__Bacteria;p__Bacteroidetes;c__Flavobacteriia;o__Flavobacteriales;f__Flavobacteriaceae;g__Flavobacterium;s__unidentified_Flavobacterium	0.9978672041987228
ASV_25352	d__Bacteria;p__Actinobacteria;c__Actinobacteria;o__Actinomycetales;f__Micromonosporaceae;g__unclassified_Micromonosporaceae;s__unclassified_Micromonosporaceae	0.9999827636713011
ASV_8606	d__Bacteria;p__Actinobacteria;c__Actinobacteria;o__Actinomycetales;f__Geodermatophilaceae;g__unidentified_Geodermatophilaceae;s__unidentified_Geodermatophilaceae	0.8364116235472165
ASV_3733	d__Bacteria;p__Proteobacteria;c__Alphaproteobacteria;o__Rhodospirillales;f__Acetobacteraceae;g__unidentified_Acetobacteraceae;s__unidentified_Acetobacteraceae	0.9982159950198615
ASV_8744	d__Bacteria;p__Proteobacteria;c__Gammaproteobacteria;o__Pseudomonadales;f__Pseudomonadaceae;g__Pseudomonas;s__Pseudomonas_viridiflava	0.8061756226711723
ASV_10155	d__Bacteria;p__Proteobacteria;c__Gammaproteobacteria;o__Legionellales;f__unidentified_Legionellales;g__unidentified_Legionellales;s__unidentified_Legionellales	0.9707289760014502
ASV_8652	d__Bacteria;p__Firmicutes;c__Clostridia;o__Clostridiales;f__Ruminococcaceae;g__unidentified_Ruminococcaceae;s__unidentified_Ruminococcaceae	0.9991508398765251
ASV_19652	d__Bacteria;p__Proteobacteria;c__Betaproteobacteria;o__Burkholderiales;f__Comamonadaceae;g__Polaromonas;s__unidentified_Polaromonas	0.8694597851807407
ASV_10940	d__Bacteria;p__Bacteroidetes;c__Bacteroidia;o__Bacteroidales;f__Porphyromonadaceae;g__Parabacteroides;s__Parabacteroides_distasonis	0.9999969313436355
ASV_20598	d__Bacteria;p__Firmicutes;c__Clostridia;o__Clostridiales;f__Lachnospiraceae;g__unidentified_Lachnospiraceae;s__unidentified_Lachnospiraceae	0.9655176845331969
ASV_25048	d__Bacteria;p__Firmicutes;c__Clostridia;o__Clostridiales;f__Ruminococcaceae;g__Oscillospira;s__unidentified_Oscillospira	0.9989699348656896
ASV_24426	d__Bacteria;p__Firmicutes;c__Clostridia;o__Clostridiales;f__Ruminococcaceae;g__Oscillospira;s__unidentified_Oscillospira	0.9996719977905913
ASV_21564	d__Bacteria;p__Proteobacteria;c__Alphaproteobacteria;o__Rickettsiales;f__unidentified_Rickettsiales;g__unidentified_Rickettsiales;s__unidentified_Rickettsiales	0.9999518204120242
ASV_2653	d__Bacteria;p__Firmicutes;c__Clostridia;o__Clostridiales;f__Ruminococcaceae;g__Ruminococcus;s__unidentified_Ruminococcus	0.90723823211181
ASV_2219	d__Bacteria;p__Firmicutes;c__Clostridia;o__Clostridiales;f__Ruminococcaceae;g__Oscillospira;s__unidentified_Oscillospira	0.9999028023953184
ASV_5021	d__Bacteria;p__Firmicutes;c__Clostridia;o__Clostridiales;f__Ruminococcaceae;g__Oscillospira;s__unidentified_Oscillospira	0.9184671261363688
ASV_11425	d__Bacteria;p__Proteobacteria;c__Alphaproteobacteria;o__Caulobacterales;f__Caulobacteraceae;g__Phenylobacterium;s__unidentified_Phenylobacterium	0.9839843549895803
ASV_23028	d__Bacteria;p__Firmicutes;c__Clostridia;o__Clostridiales;f__Ruminococcaceae;g__unidentified_Ruminococcaceae;s__unidentified_Ruminococcaceae	0.9737919258982273
ASV_1101	d__Bacteria;p__Gemmatimonadetes;c__Gemm-1;o__unidentified_Gemm-1;f__unidentified_Gemm-1;g__unidentified_Gemm-1;s__unidentified_Gemm-1	0.9999999972140472
ASV_26397	d__Bacteria;p__Actinobacteria;c__Actinobacteria;o__Actinomycetales;f__Micromonosporaceae;g__Virgisporangium;s__unidentified_Virgisporangium	0.835968145576273
ASV_18980	d__Bacteria;p__Actinobacteria;c__Actinobacteria;o__unclassified_Actinobacteria;f__unclassified_Actinobacteria;g__unclassified_Actinobacteria;s__unclassified_Actinobacteria	0.9999999189165629
ASV_7496	d__Bacteria;p__Proteobacteria;c__Alphaproteobacteria;o__Rhodospirillales;f__Acetobacteraceae;g__unidentified_Acetobacteraceae;s__unidentified_Acetobacteraceae	0.9963868374375185
ASV_15016	d__Bacteria;p__Acidobacteria;c__Acidobacteria-6;o__iii1-15;f__unidentified_iii1-15;g__unidentified_iii1-15;s__unidentified_iii1-15	0.999707523696631
ASV_5824	d__Bacteria;p__Firmicutes;c__Bacilli;o__Bacillales;f__Thermoactinomycetaceae;g__Shimazuella;s__unidentified_Shimazuella	0.9999964894305949
ASV_18318	d__Bacteria;p__Bacteroidetes;c__Bacteroidia;o__Bacteroidales;f__Prevotellaceae;g__Prevotella;s__Prevotella_copri	0.9994312727419628
ASV_1894	d__Bacteria;p__Bacteroidetes;c__Bacteroidia;o__Bacteroidales;f__S24-7;g__unidentified_S24-7;s__unidentified_S24-7	0.99997028674821
ASV_24403	d__Bacteria;p__Proteobacteria;c__Betaproteobacteria;o__Burkholderiales;f__Alcaligenaceae;g__unidentified_Alcaligenaceae;s__unidentified_Alcaligenaceae	0.7945137496620797
ASV_2820	d__Bacteria;p__Tenericutes;c__Mollicutes;o__RF39;f__unidentified_RF39;g__unidentified_RF39;s__unidentified_RF39	0.9999999992589892
ASV_12080	d__Bacteria;p__Firmicutes;c__Bacilli;o__Lactobacillales;f__Lactobacillaceae;g__Lactobacillus;s__Lactobacillus_paralimentarius	0.9999928818275342
ASV_20261	d__Bacteria;p__Proteobacteria;c__Betaproteobacteria;o__Burkholderiales;f__Alcaligenaceae;g__Sutterella;s__unidentified_Sutterella	0.9999999346327136
ASV_20960	d__Bacteria;p__Firmicutes;c__Erysipelotrichi;o__Erysipelotrichales;f__Erysipelotrichaceae;g__cc_115;s__unidentified_cc_115	0.7521998632628127
ASV_25523	d__Bacteria;p__Firmicutes;c__Clostridia;o__Clostridiales;f__Ruminococcaceae;g__unidentified_Ruminococcaceae;s__unidentified_Ruminococcaceae	0.9937107664325642
ASV_14858	d__Bacteria;p__Firmicutes;c__Clostridia;o__Clostridiales;f__[Mogibacteriaceae];g__unidentified_[Mogibacteriaceae];s__unidentified_[Mogibacteriaceae]	0.999991125235641
ASV_16961	d__Bacteria;p__Firmicutes;c__Clostridia;o__Clostridiales;f__Veillonellaceae;g__unidentified_Veillonellaceae;s__unidentified_Veillonellaceae	0.9999802135605332
ASV_20303	d__Bacteria;p__Bacteroidetes;c__[Saprospirae];o__[Saprospirales];f__Chitinophagaceae;g__unidentified_Chitinophagaceae;s__unidentified_Chitinophagaceae	0.9985357421847555
ASV_23408	d__Bacteria;p__Verrucomicrobia;c__[Spartobacteria];o__[Chthoniobacterales];f__[Chthoniobacteraceae];g__DA101;s__unidentified_DA101	0.9943372473445682
ASV_22329	d__Bacteria;p__Proteobacteria;c__Alphaproteobacteria;o__Rhizobiales;f__Methylobacteriaceae;g__Methylobacterium;s__unclassified_Methylobacterium	0.9999999406302126
ASV_10868	d__Bacteria;p__Bacteroidetes;c__[Saprospirae];o__[Saprospirales];f__Saprospiraceae;g__unidentified_Saprospiraceae;s__unidentified_Saprospiraceae	0.9997021069748134
ASV_6561	d__Bacteria;p__TM7;c__TM7-3;o__unidentified_TM7-3;f__unidentified_TM7-3;g__unidentified_TM7-3;s__unidentified_TM7-3	0.9957591695832841
ASV_14298	d__Bacteria;p__Proteobacteria;c__Gammaproteobacteria;o__Aeromonadales;f__Succinivibrionaceae;g__Succinivibrio;s__unidentified_Succinivibrio	0.9999999773419861
ASV_26290	d__Bacteria;p__Firmicutes;c__Bacilli;o__Lactobacillales;f__Lactobacillaceae;g__Lactobacillus;s__Lactobacillus_vaginalis	0.8712489420291728
ASV_24480	d__Bacteria;p__Bacteroidetes;c__Bacteroidia;o__Bacteroidales;f__S24-7;g__unidentified_S24-7;s__unidentified_S24-7	0.9999984808209945
ASV_6991	d__Bacteria;p__Firmicutes;c__Clostridia;o__Clostridiales;f__Peptostreptococcaceae;g__unidentified_Peptostreptococcaceae;s__unidentified_Peptostreptococcaceae	0.7153825289878102
ASV_13764	d__Bacteria;p__Actinobacteria;c__Actinobacteria;o__Actinomycetales;f__Streptosporangiaceae;g__unclassified_Streptosporangiaceae;s__unclassified_Streptosporangiaceae	0.9999985619280507
ASV_17985	d__Bacteria;p__unclassified_Bacteria;c__unclassified_Bacteria;o__unclassified_Bacteria;f__unclassified_Bacteria;g__unclassified_Bacteria;s__unclassified_Bacteria	0.9999999999997768
ASV_734	d__Bacteria;p__unidentified_Bacteria;c__unidentified_Bacteria;o__unidentified_Bacteria;f__unidentified_Bacteria;g__unidentified_Bacteria;s__unidentified_Bacteria	0.9003326761477273
ASV_18492	d__Bacteria;p__Gemmatimonadetes;c__Gemmatimonadetes;o__unidentified_Gemmatimonadetes;f__unidentified_Gemmatimonadetes;g__unidentified_Gemmatimonadetes;s__unidentified_Gemmatimonadetes	0.9999298280875077
ASV_8523	d__Bacteria;p__Actinobacteria;c__Thermoleophilia;o__Gaiellales;f__Gaiellaceae;g__unidentified_Gaiellaceae;s__unidentified_Gaiellaceae	0.9999677930083976
ASV_21346	d__Bacteria;p__Proteobacteria;c__Betaproteobacteria;o__Rhodocyclales;f__Rhodocyclaceae;g__Azoarcus;s__unidentified_Azoarcus	0.9978818598600245
ASV_19927	d__Bacteria;p__Actinobacteria;c__Actinobacteria;o__Actinomycetales;f__Micromonosporaceae;g__Micromonospora;s__unclassified_Micromonospora	0.9578409148940646
ASV_11064	d__Bacteria;p__Proteobacteria;c__Gammaproteobacteria;o__Pseudomonadales;f__Moraxellaceae;g__Acinetobacter;s__unidentified_Acinetobacter	0.8565069427504474
ASV_21095	d__Bacteria;p__Proteobacteria;c__Gammaproteobacteria;o__Pseudomonadales;f__Moraxellaceae;g__Acinetobacter;s__unclassified_Acinetobacter	0.9999631624401268
ASV_10093	d__Bacteria;p__Firmicutes;c__Clostridia;o__Clostridiales;f__Veillonellaceae;g__unidentified_Veillonellaceae;s__unidentified_Veillonellaceae	0.9782358056942753
ASV_23933	d__Bacteria;p__Firmicutes;c__Clostridia;o__Clostridiales;f__Ruminococcaceae;g__Ruminococcus;s__unidentified_Ruminococcus	0.9799421041695463
ASV_5947	d__Bacteria;p__Proteobacteria;c__Alphaproteobacteria;o__Rhizobiales;f__Bradyrhizobiaceae;g__unclassified_Bradyrhizobiaceae;s__unclassified_Bradyrhizobiaceae	0.9957374312227811
ASV_13723	d__Bacteria;p__Bacteroidetes;c__Bacteroidia;o__Bacteroidales;f__S24-7;g__unidentified_S24-7;s__unidentified_S24-7	0.9999997498324291
ASV_5640	d__Bacteria;p__Bacteroidetes;c__Bacteroidia;o__Bacteroidales;f__S24-7;g__unidentified_S24-7;s__unidentified_S24-7	0.9999753875007139
ASV_21755	d__Bacteria;p__Firmicutes;c__Clostridia;o__Clostridiales;f__[Mogibacteriaceae];g__unidentified_[Mogibacteriaceae];s__unidentified_[Mogibacteriaceae]	0.9999928195841797
ASV_6216	d__Bacteria;p__Firmicutes;c__Clostridia;o__Clostridiales;f__[Mogibacteriaceae];g__unidentified_[Mogibacteriaceae];s__unidentified_[Mogibacteriaceae]	0.9967633492928096
ASV_23840	d__Bacteria;p__Firmicutes;c__Clostridia;o__Clostridiales;f__Ruminococcaceae;g__Oscillospira;s__unidentified_Oscillospira	0.9924352787960127
ASV_10091	d__Bacteria;p__Firmicutes;c__Clostridia;o__Clostridiales;f__Ruminococcaceae;g__Oscillospira;s__unidentified_Oscillospira	0.9990562223775102
ASV_12456	d__Bacteria;p__Firmicutes;c__Clostridia;o__Clostridiales;f__Ruminococcaceae;g__unidentified_Ruminococcaceae;s__unidentified_Ruminococcaceae	0.9983769862737865
ASV_6753	d__Bacteria;p__Firmicutes;c__Clostridia;o__Clostridiales;f__Ruminococcaceae;g__Ruminococcus;s__unidentified_Ruminococcus	0.9739457117370336
ASV_6188	d__Bacteria;p__Tenericutes;c__Mollicutes;o__RF39;f__unidentified_RF39;g__unidentified_RF39;s__unidentified_RF39	0.9999999968899829
ASV_7543	d__Bacteria;p__Firmicutes;c__Erysipelotrichi;o__Erysipelotrichales;f__Erysipelotrichaceae;g__Coprobacillus;s__unidentified_Coprobacillus	0.9989532324841746
ASV_7765	d__Bacteria;p__unidentified_Bacteria;c__unidentified_Bacteria;o__unidentified_Bacteria;f__unidentified_Bacteria;g__unidentified_Bacteria;s__unidentified_Bacteria	0.8935701216102331
ASV_10228	d__Bacteria;p__Proteobacteria;c__Alphaproteobacteria;o__Rhizobiales;f__Phyllobacteriaceae;g__Mesorhizobium;s__unidentified_Mesorhizobium	0.9458109117588458
ASV_21592	d__Bacteria;p__Proteobacteria;c__Alphaproteobacteria;o__Ellin329;f__unidentified_Ellin329;g__unidentified_Ellin329;s__unidentified_Ellin329	0.9999999471272659
ASV_8286	d__Bacteria;p__Firmicutes;c__Bacilli;o__Bacillales;f__Bacillaceae;g__Bacillus;s__Bacillus_flexus	0.995832384926895
ASV_23309	d__Bacteria;p__Proteobacteria;c__Gammaproteobacteria;o__Pseudomonadales;f__Moraxellaceae;g__Acinetobacter;s__unidentified_Acinetobacter	0.9671499830977749
ASV_2696	d__Bacteria;p__Bacteroidetes;c__Flavobacteriia;o__Flavobacteriales;f__Flavobacteriaceae;g__Flavobacterium;s__Flavobacterium_frigidarium	0.9211232538580694
ASV_9689	d__Bacteria;p__Actinobacteria;c__Actinobacteria;o__Actinomycetales;f__Micrococcaceae;g__Arthrobacter;s__unclassified_Arthrobacter	0.9917518933589878
ASV_7954	d__Bacteria;p__unclassified_Bacteria;c__unclassified_Bacteria;o__unclassified_Bacteria;f__unclassified_Bacteria;g__unclassified_Bacteria;s__unclassified_Bacteria	0.9999999999998737
ASV_4482	d__Bacteria;p__Actinobacteria;c__Rubrobacteria;o__Rubrobacterales;f__Rubrobacteraceae;g__Rubrobacter;s__unidentified_Rubrobacter	0.9986214862624083
ASV_21132	d__Bacteria;p__Firmicutes;c__Clostridia;o__Clostridiales;f__Ruminococcaceae;g__Oscillospira;s__unidentified_Oscillospira	0.9862948677484559
ASV_21316	d__Bacteria;p__TM7;c__TM7-1;o__unidentified_TM7-1;f__unidentified_TM7-1;g__unidentified_TM7-1;s__unidentified_TM7-1	0.9999999217847093
ASV_21532	d__Bacteria;p__Actinobacteria;c__Actinobacteria;o__Actinomycetales;f__Micromonosporaceae;g__unclassified_Micromonosporaceae;s__unclassified_Micromonosporaceae	0.9997271076051379
ASV_2486	d__Bacteria;p__Acidobacteria;c__[Chloracidobacteria];o__RB41;f__Ellin6075;g__unidentified_Ellin6075;s__unidentified_Ellin6075	0.9999999322463419
ASV_14679	d__Bacteria;p__WPS-2;c__unidentified_WPS-2;o__unidentified_WPS-2;f__unidentified_WPS-2;g__unidentified_WPS-2;s__unidentified_WPS-2	0.999999684679203
ASV_22970	d__Bacteria;p__Acidobacteria;c__Acidobacteriia;o__Acidobacteriales;f__Koribacteraceae;g__Candidatus_Koribacter;s__unidentified_Candidatus_Koribacter	0.9956791298430075
ASV_25386	d__Bacteria;p__Proteobacteria;c__Alphaproteobacteria;o__Rhodospirillales;f__unidentified_Rhodospirillales;g__unidentified_Rhodospirillales;s__unidentified_Rhodospirillales	0.999999966043078
ASV_17674	d__Bacteria;p__Actinobacteria;c__Acidimicrobiia;o__Acidimicrobiales;f__EB1017;g__unidentified_EB1017;s__unidentified_EB1017	0.9992501120577295
ASV_5567	d__Bacteria;p__Firmicutes;c__Clostridia;o__Clostridiales;f__Lachnospiraceae;g__Dorea;s__unclassified_Dorea	0.8940850537843892
ASV_2961	d__Bacteria;p__Firmicutes;c__Clostridia;o__Clostridiales;f__Lachnospiraceae;g__unclassified_Lachnospiraceae;s__unclassified_Lachnospiraceae	0.9622092079281064
ASV_9752	d__Bacteria;p__Firmicutes;c__Clostridia;o__Clostridiales;f__Ruminococcaceae;g__Ruminococcus;s__unidentified_Ruminococcus	0.994050298895305
ASV_14934	d__Bacteria;p__Tenericutes;c__Mollicutes;o__RF39;f__unidentified_RF39;g__unidentified_RF39;s__unidentified_RF39	0.9999999406844342
ASV_15654	d__Bacteria;p__Bacteroidetes;c__Bacteroidia;o__Bacteroidales;f__S24-7;g__unidentified_S24-7;s__unidentified_S24-7	0.9999997268964282
ASV_15932	d__Bacteria;p__Firmicutes;c__Clostridia;o__Clostridiales;f__Ruminococcaceae;g__Ruminococcus;s__Ruminococcus_albus	0.9949191738398072
ASV_2091	d__Bacteria;p__Firmicutes;c__Clostridia;o__Clostridiales;f__Ruminococcaceae;g__unidentified_Ruminococcaceae;s__unidentified_Ruminococcaceae	0.9992087554310392
ASV_6822	d__Bacteria;p__Proteobacteria;c__Gammaproteobacteria;o__Pseudomonadales;f__Moraxellaceae;g__Acinetobacter;s__Acinetobacter_schindleri	0.7718197825917688
ASV_1567	d__Bacteria;p__Proteobacteria;c__Deltaproteobacteria;o__Myxococcales;f__unidentified_Myxococcales;g__unidentified_Myxococcales;s__unidentified_Myxococcales	0.9986214179667783
ASV_6791	d__Bacteria;p__Bacteroidetes;c__Sphingobacteriia;o__Sphingobacteriales;f__Sphingobacteriaceae;g__Mucilaginibacter;s__Mucilaginibacter_ximonensis	0.8451507149498158
ASV_18484	d__Bacteria;p__Acidobacteria;c__Acidobacteriia;o__Acidobacteriales;f__Koribacteraceae;g__Candidatus_Koribacter;s__unidentified_Candidatus_Koribacter	0.9966777566425724
ASV_4627	d__Bacteria;p__Acidobacteria;c__Solibacteres;o__Solibacterales;f__unidentified_Solibacterales;g__unidentified_Solibacterales;s__unidentified_Solibacterales	0.9994476029717257
ASV_20189	d__Bacteria;p__Chloroflexi;c__Ktedonobacteria;o__B10-SB3A;f__unidentified_B10-SB3A;g__unidentified_B10-SB3A;s__unidentified_B10-SB3A	0.9874749046209635
ASV_11137	d__Bacteria;p__Proteobacteria;c__Alphaproteobacteria;o__Rhodospirillales;f__Rhodospirillaceae;g__unidentified_Rhodospirillaceae;s__unidentified_Rhodospirillaceae	0.9978618838460366
ASV_5966	d__Bacteria;p__Proteobacteria;c__Alphaproteobacteria;o__Caulobacterales;f__Caulobacteraceae;g__Phenylobacterium;s__unidentified_Phenylobacterium	0.999793974853968
ASV_1491	d__Bacteria;p__Firmicutes;c__Clostridia;o__Clostridiales;f__unidentified_Clostridiales;g__unidentified_Clostridiales;s__unidentified_Clostridiales	0.9999906401488432
ASV_12130	d__Bacteria;p__unidentified_Bacteria;c__unidentified_Bacteria;o__unidentified_Bacteria;f__unidentified_Bacteria;g__unidentified_Bacteria;s__unidentified_Bacteria	0.9136870815827008
ASV_1251	d__Bacteria;p__Firmicutes;c__Clostridia;o__Clostridiales;f__Ruminococcaceae;g__Ruminococcus;s__Ruminococcus_callidus	0.9674829158354729
ASV_7214	d__Bacteria;p__Firmicutes;c__Bacilli;o__Bacillales;f__Alicyclobacillaceae;g__Alicyclobacillus;s__unidentified_Alicyclobacillus	0.9999999999826628
ASV_6654	d__Bacteria;p__unclassified_Bacteria;c__unclassified_Bacteria;o__unclassified_Bacteria;f__unclassified_Bacteria;g__unclassified_Bacteria;s__unclassified_Bacteria	0.9999999999997183
ASV_13815	d__Bacteria;p__TM7;c__TM7-1;o__unidentified_TM7-1;f__unidentified_TM7-1;g__unidentified_TM7-1;s__unidentified_TM7-1	0.9999998196291123
ASV_19430	d__Bacteria;p__Firmicutes;c__Clostridia;o__Clostridiales;f__[Mogibacteriaceae];g__unclassified_[Mogibacteriaceae];s__unclassified_[Mogibacteriaceae]	0.7845266672632808
ASV_21017	d__Bacteria;p__Actinobacteria;c__Actinobacteria;o__Actinomycetales;f__Nocardioidaceae;g__unclassified_Nocardioidaceae;s__unclassified_Nocardioidaceae	0.999993972277579
ASV_19810	d__Bacteria;p__Proteobacteria;c__Betaproteobacteria;o__Burkholderiales;f__Alcaligenaceae;g__unidentified_Alcaligenaceae;s__unidentified_Alcaligenaceae	0.9712071090054464
ASV_7483	d__Bacteria;p__Bacteroidetes;c__[Saprospirae];o__[Saprospirales];f__Chitinophagaceae;g__unidentified_Chitinophagaceae;s__unidentified_Chitinophagaceae	0.9983944333569816
ASV_10421	d__Bacteria;p__Proteobacteria;c__Alphaproteobacteria;o__unclassified_Alphaproteobacteria;f__unclassified_Alphaproteobacteria;g__unclassified_Alphaproteobacteria;s__unclassified_Alphaproteobacteria	0.9999230842379727
ASV_10919	d__Bacteria;p__Proteobacteria;c__Gammaproteobacteria;o__Xanthomonadales;f__Xanthomonadaceae;g__Rhodanobacter;s__unclassified_Rhodanobacter	0.9712869120733959
ASV_8100	d__Bacteria;p__Proteobacteria;c__Alphaproteobacteria;o__Rhodospirillales;f__Rhodospirillaceae;g__unidentified_Rhodospirillaceae;s__unidentified_Rhodospirillaceae	0.9660520842070561
ASV_23759	d__Bacteria;p__Proteobacteria;c__Deltaproteobacteria;o__Myxococcales;f__Haliangiaceae;g__unidentified_Haliangiaceae;s__unidentified_Haliangiaceae	0.9999951873046334
ASV_8845	d__Bacteria;p__Proteobacteria;c__Alphaproteobacteria;o__unclassified_Alphaproteobacteria;f__unclassified_Alphaproteobacteria;g__unclassified_Alphaproteobacteria;s__unclassified_Alphaproteobacteria	0.9299260095955784
ASV_19438	d__Bacteria;p__[Thermi];c__Deinococci;o__Deinococcales;f__Deinococcaceae;g__R18-435;s__unidentified_R18-435	0.9894333871677572
ASV_21717	d__Bacteria;p__Bacteroidetes;c__Bacteroidia;o__Bacteroidales;f__S24-7;g__unidentified_S24-7;s__unidentified_S24-7	0.9999962448869743
ASV_7537	d__Bacteria;p__Firmicutes;c__Clostridia;o__Clostridiales;f__Ruminococcaceae;g__unidentified_Ruminococcaceae;s__unidentified_Ruminococcaceae	0.9953378313758412
ASV_1954	d__Bacteria;p__Firmicutes;c__Clostridia;o__Clostridiales;f__Ruminococcaceae;g__unidentified_Ruminococcaceae;s__unidentified_Ruminococcaceae	0.8633886289113786
ASV_19768	d__Bacteria;p__Firmicutes;c__Clostridia;o__Clostridiales;f__Ruminococcaceae;g__Oscillospira;s__unidentified_Oscillospira	0.9994629269597748
ASV_15446	d__Bacteria;p__Firmicutes;c__Clostridia;o__Clostridiales;f__Ruminococcaceae;g__Oscillospira;s__unidentified_Oscillospira	0.9990227104065398
ASV_18443	d__Bacteria;p__Firmicutes;c__Clostridia;o__Clostridiales;f__Ruminococcaceae;g__unclassified_Ruminococcaceae;s__unclassified_Ruminococcaceae	0.9999798430037087
ASV_22325	d__Bacteria;p__Bacteroidetes;c__Sphingobacteriia;o__Sphingobacteriales;f__Sphingobacteriaceae;g__unidentified_Sphingobacteriaceae;s__unidentified_Sphingobacteriaceae	0.9515999334152586
ASV_5296	d__Bacteria;p__Firmicutes;c__Bacilli;o__Bacillales;f__Staphylococcaceae;g__Staphylococcus;s__unidentified_Staphylococcus	0.7247005813058713
ASV_10187	d__Bacteria;p__TM7;c__TM7-1;o__unidentified_TM7-1;f__unidentified_TM7-1;g__unidentified_TM7-1;s__unidentified_TM7-1	0.9999995594288695
ASV_13397	d__Bacteria;p__Chloroflexi;c__Ellin6529;o__unidentified_Ellin6529;f__unidentified_Ellin6529;g__unidentified_Ellin6529;s__unidentified_Ellin6529	0.9999999999842828
ASV_3056	d__Bacteria;p__Firmicutes;c__Clostridia;o__Clostridiales;f__Clostridiaceae;g__Proteiniclasticum;s__unidentified_Proteiniclasticum	0.9891685644705211
ASV_15049	d__Bacteria;p__Firmicutes;c__Clostridia;o__Clostridiales;f__Ruminococcaceae;g__Ruminococcus;s__Ruminococcus_albus	0.9999909089084431
ASV_25457	d__Bacteria;p__Firmicutes;c__Clostridia;o__Clostridiales;f__Clostridiaceae;g__Clostridium;s__unclassified_Clostridium	0.9998990099687988
ASV_9977	d__Bacteria;p__Actinobacteria;c__Actinobacteria;o__Actinomycetales;f__Microbacteriaceae;g__unclassified_Microbacteriaceae;s__unclassified_Microbacteriaceae	0.9999671737382715
ASV_13500	d__Bacteria;p__Proteobacteria;c__Gammaproteobacteria;o__Xanthomonadales;f__Xanthomonadaceae;g__unclassified_Xanthomonadaceae;s__unclassified_Xanthomonadaceae	0.9997849766901848
ASV_3169	d__Bacteria;p__Gemmatimonadetes;c__Gemmatimonadetes;o__unclassified_Gemmatimonadetes;f__unclassified_Gemmatimonadetes;g__unclassified_Gemmatimonadetes;s__unclassified_Gemmatimonadetes	0.9999999989771353
ASV_11284	d__Bacteria;p__Chloroflexi;c__Thermomicrobia;o__unidentified_Thermomicrobia;f__unidentified_Thermomicrobia;g__unidentified_Thermomicrobia;s__unidentified_Thermomicrobia	0.9988064840686488
ASV_19553	d__Bacteria;p__Proteobacteria;c__Gammaproteobacteria;o__Xanthomonadales;f__Xanthomonadaceae;g__Thermomonas;s__unidentified_Thermomonas	0.9552444243209696
ASV_7003	d__Bacteria;p__[Thermi];c__Deinococci;o__Deinococcales;f__Trueperaceae;g__B-42;s__unidentified_B-42	0.8776722344045959
ASV_3560	d__Bacteria;p__Firmicutes;c__Clostridia;o__Clostridiales;f__Lachnospiraceae;g__unclassified_Lachnospiraceae;s__unclassified_Lachnospiraceae	0.980694593011805
ASV_20104	d__Bacteria;p__Proteobacteria;c__Gammaproteobacteria;o__Xanthomonadales;f__Xanthomonadaceae;g__unclassified_Xanthomonadaceae;s__unclassified_Xanthomonadaceae	0.9996594995393714
ASV_17386	d__Bacteria;p__Actinobacteria;c__Actinobacteria;o__Actinomycetales;f__Nocardioidaceae;g__Nocardioides;s__unclassified_Nocardioides	0.889129753228257
ASV_26161	d__Bacteria;p__Proteobacteria;c__Betaproteobacteria;o__Burkholderiales;f__Oxalobacteraceae;g__Massilia;s__unclassified_Massilia	0.9506607083321645
ASV_24178	d__Bacteria;p__Firmicutes;c__Bacilli;o__Lactobacillales;f__Lactobacillaceae;g__Lactobacillus;s__Lactobacillus_helveticus	0.8875667064721157
ASV_5744	d__Bacteria;p__Cyanobacteria;c__4C0d-2;o__YS2;f__unidentified_YS2;g__unidentified_YS2;s__unidentified_YS2	0.9999999999945715
ASV_6764	d__Bacteria;p__Firmicutes;c__Clostridia;o__Clostridiales;f__unidentified_Clostridiales;g__unidentified_Clostridiales;s__unidentified_Clostridiales	0.9999118699332976
ASV_10286	d__Bacteria;p__Firmicutes;c__Clostridia;o__Clostridiales;f__Ruminococcaceae;g__unidentified_Ruminococcaceae;s__unidentified_Ruminococcaceae	0.9989520898214698
ASV_14761	d__Bacteria;p__Firmicutes;c__Clostridia;o__Clostridiales;f__Ruminococcaceae;g__unidentified_Ruminococcaceae;s__unidentified_Ruminococcaceae	0.9888527169537606
ASV_23058	d__Bacteria;p__Actinobacteria;c__Actinobacteria;o__Actinomycetales;f__unidentified_Actinomycetales;g__unidentified_Actinomycetales;s__unidentified_Actinomycetales	0.8871467128611632
ASV_2813	d__Bacteria;p__Chloroflexi;c__Thermomicrobia;o__JG30-KF-CM45;f__unidentified_JG30-KF-CM45;g__unidentified_JG30-KF-CM45;s__unidentified_JG30-KF-CM45	0.9999999998839257
ASV_11769	d__Bacteria;p__Actinobacteria;c__Actinobacteria;o__Actinomycetales;f__Nocardioidaceae;g__unidentified_Nocardioidaceae;s__unidentified_Nocardioidaceae	0.9896825908839889
ASV_6924	d__Bacteria;p__Chloroflexi;c__Thermomicrobia;o__JG30-KF-CM45;f__unidentified_JG30-KF-CM45;g__unidentified_JG30-KF-CM45;s__unidentified_JG30-KF-CM45	0.9999999641004542
ASV_22017	d__Bacteria;p__Firmicutes;c__Bacilli;o__Lactobacillales;f__Lactobacillaceae;g__unidentified_Lactobacillaceae;s__unidentified_Lactobacillaceae	0.728194415167079
ASV_22132	d__Bacteria;p__Firmicutes;c__Bacilli;o__Bacillales;f__Bacillaceae;g__Bacillus;s__unclassified_Bacillus	0.8208600488537787
ASV_24228	d__Bacteria;p__Acidobacteria;c__Acidobacteria-6;o__iii1-15;f__RB40;g__unidentified_RB40;s__unidentified_RB40	0.9999999999621139
ASV_20757	d__Bacteria;p__Actinobacteria;c__Actinobacteria;o__Actinomycetales;f__Micromonosporaceae;g__Micromonospora;s__unclassified_Micromonospora	0.8991316425385173
ASV_6074	d__Bacteria;p__Firmicutes;c__Clostridia;o__Clostridiales;f__unclassified_Clostridiales;g__unclassified_Clostridiales;s__unclassified_Clostridiales	0.9999999926414755
ASV_5439	d__Bacteria;p__Acidobacteria;c__Acidobacteriia;o__Acidobacteriales;f__Acidobacteriaceae;g__unidentified_Acidobacteriaceae;s__unidentified_Acidobacteriaceae	0.9984048813079858
ASV_6497	d__Bacteria;p__Planctomycetes;c__Planctomycetia;o__Gemmatales;f__Gemmataceae;g__unidentified_Gemmataceae;s__unidentified_Gemmataceae	0.9999915950600886
ASV_12859	d__Bacteria;p__Firmicutes;c__Clostridia;o__Clostridiales;f__Clostridiaceae;g__Proteiniclasticum;s__unidentified_Proteiniclasticum	0.9999984621949978
ASV_12050	d__Bacteria;p__Actinobacteria;c__Actinobacteria;o__Actinomycetales;f__Kineosporiaceae;g__unidentified_Kineosporiaceae;s__unidentified_Kineosporiaceae	0.9309343587137603
ASV_16152	d__Bacteria;p__Proteobacteria;c__Gammaproteobacteria;o__Thiotrichales;f__Piscirickettsiaceae;g__unidentified_Piscirickettsiaceae;s__unidentified_Piscirickettsiaceae	0.9931455226384516
ASV_7330	d__Bacteria;p__Firmicutes;c__Bacilli;o__Lactobacillales;f__Aerococcaceae;g__unclassified_Aerococcaceae;s__unclassified_Aerococcaceae	0.9999999880849137
ASV_24994	d__Bacteria;p__Nitrospirae;c__Nitrospira;o__Nitrospirales;f__Nitrospiraceae;g__unidentified_Nitrospiraceae;s__unidentified_Nitrospiraceae	0.9076845374943737
ASV_19375	d__Bacteria;p__Chloroflexi;c__Ktedonobacteria;o__Ktedonobacterales;f__Ktedonobacteraceae;g__unidentified_Ktedonobacteraceae;s__unidentified_Ktedonobacteraceae	0.9994509938024887
ASV_16040	d__Bacteria;p__Actinobacteria;c__Actinobacteria;o__Actinomycetales;f__Micromonosporaceae;g__unclassified_Micromonosporaceae;s__unclassified_Micromonosporaceae	0.9999828196955151
ASV_4643	d__Bacteria;p__Firmicutes;c__Clostridia;o__Clostridiales;f__unclassified_Clostridiales;g__unclassified_Clostridiales;s__unclassified_Clostridiales	0.9999993972154361
ASV_12047	d__Bacteria;p__Proteobacteria;c__Alphaproteobacteria;o__Rhodospirillales;f__Rhodospirillaceae;g__unidentified_Rhodospirillaceae;s__unidentified_Rhodospirillaceae	0.998225726937369
ASV_18066	d__Bacteria;p__Firmicutes;c__Bacilli;o__Bacillales;f__[Exiguobacteraceae];g__Exiguobacterium;s__unidentified_Exiguobacterium	0.99667175277315
ASV_22878	d__Bacteria;p__Chlamydiae;c__Chlamydiia;o__unidentified_Chlamydiia;f__unidentified_Chlamydiia;g__unidentified_Chlamydiia;s__unidentified_Chlamydiia	0.9962163687433546
ASV_6073	d__Bacteria;p__Bacteroidetes;c__Bacteroidia;o__Bacteroidales;f__Prevotellaceae;g__Prevotella;s__unidentified_Prevotella	0.9997846562926906
ASV_15730	d__Bacteria;p__Bacteroidetes;c__Bacteroidia;o__Bacteroidales;f__S24-7;g__unidentified_S24-7;s__unidentified_S24-7	0.9999998769981251
ASV_15731	d__Bacteria;p__Proteobacteria;c__Alphaproteobacteria;o__Rhizobiales;f__unclassified_Rhizobiales;g__unclassified_Rhizobiales;s__unclassified_Rhizobiales	0.9997926301573989
ASV_4358	d__Bacteria;p__Firmicutes;c__Clostridia;o__Clostridiales;f__Lachnospiraceae;g__[Ruminococcus];s__[Ruminococcus]_gnavus	0.989329123667466
ASV_17459	d__Bacteria;p__Firmicutes;c__Clostridia;o__Clostridiales;f__unclassified_Clostridiales;g__unclassified_Clostridiales;s__unclassified_Clostridiales	0.9995249219166344
ASV_17410	d__Bacteria;p__Proteobacteria;c__Betaproteobacteria;o__Burkholderiales;f__Burkholderiaceae;g__Burkholderia;s__Burkholderia_tuberum	0.9800715556984188
ASV_23806	d__Bacteria;p__Actinobacteria;c__Actinobacteria;o__Actinomycetales;f__Microbacteriaceae;g__unclassified_Microbacteriaceae;s__unclassified_Microbacteriaceae	0.9476734739965873
ASV_17816	d__Bacteria;p__Actinobacteria;c__Actinobacteria;o__Actinomycetales;f__Sporichthyaceae;g__unidentified_Sporichthyaceae;s__unidentified_Sporichthyaceae	0.9881882701821658
ASV_21589	d__Bacteria;p__Fusobacteria;c__Fusobacteriia;o__Fusobacteriales;f__Fusobacteriaceae;g__Fusobacterium;s__unidentified_Fusobacterium	0.7002376727854345
ASV_1752	d__Bacteria;p__Gemmatimonadetes;c__Gemmatimonadetes;o__Ellin5290;f__unidentified_Ellin5290;g__unidentified_Ellin5290;s__unidentified_Ellin5290	0.9999671566837042
ASV_21447	d__Bacteria;p__Actinobacteria;c__Acidimicrobiia;o__Acidimicrobiales;f__C111;g__unidentified_C111;s__unidentified_C111	0.9999999816378706
ASV_8059	d__Bacteria;p__Actinobacteria;c__Thermoleophilia;o__Gaiellales;f__Gaiellaceae;g__unidentified_Gaiellaceae;s__unidentified_Gaiellaceae	0.997784614056748
ASV_18173	d__Bacteria;p__Firmicutes;c__Bacilli;o__Lactobacillales;f__Lactobacillaceae;g__Lactobacillus;s__Lactobacillus_helveticus	0.7982516202595384
ASV_21252	d__Bacteria;p__Proteobacteria;c__Gammaproteobacteria;o__Enterobacteriales;f__Enterobacteriaceae;g__unclassified_Enterobacteriaceae;s__unclassified_Enterobacteriaceae	0.9999645223712094
ASV_14422	d__Bacteria;p__Actinobacteria;c__Actinobacteria;o__Actinomycetales;f__Micromonosporaceae;g__Dactylosporangium;s__unidentified_Dactylosporangium	0.7666994268508269
ASV_24513	d__Bacteria;p__Actinobacteria;c__Actinobacteria;o__Actinomycetales;f__Micromonosporaceae;g__Virgisporangium;s__Virgisporangium_ochraceum	0.9983152690652308
ASV_16651	d__Bacteria;p__Firmicutes;c__Clostridia;o__Clostridiales;f__Lachnospiraceae;g__unclassified_Lachnospiraceae;s__unclassified_Lachnospiraceae	0.9922111497710322
ASV_19459	d__Bacteria;p__Firmicutes;c__Clostridia;o__Clostridiales;f__unclassified_Clostridiales;g__unclassified_Clostridiales;s__unclassified_Clostridiales	0.9999997975342199
ASV_10779	d__Bacteria;p__Firmicutes;c__Clostridia;o__Clostridiales;f__Lachnospiraceae;g__Coprococcus;s__unidentified_Coprococcus	0.8176418364211533
ASV_17735	d__Bacteria;p__Actinobacteria;c__Thermoleophilia;o__Gaiellales;f__unidentified_Gaiellales;g__unidentified_Gaiellales;s__unidentified_Gaiellales	0.9997284076724137
ASV_18692	d__Bacteria;p__Actinobacteria;c__Thermoleophilia;o__Gaiellales;f__Gaiellaceae;g__unidentified_Gaiellaceae;s__unidentified_Gaiellaceae	0.9999886223545599
ASV_10076	d__Bacteria;p__Proteobacteria;c__Betaproteobacteria;o__Burkholderiales;f__Comamonadaceae;g__Ramlibacter;s__unidentified_Ramlibacter	0.9101045985658542
ASV_4086	d__Bacteria;p__Firmicutes;c__Bacilli;o__Bacillales;f__Paenibacillaceae;g__Paenibacillus;s__unidentified_Paenibacillus	0.9642739296069682
ASV_8613	d__Bacteria;p__Firmicutes;c__Clostridia;o__Clostridiales;f__unidentified_Clostridiales;g__unidentified_Clostridiales;s__unidentified_Clostridiales	0.7405721996692097
ASV_20718	d__Bacteria;p__Actinobacteria;c__Thermoleophilia;o__Solirubrobacterales;f__unidentified_Solirubrobacterales;g__unidentified_Solirubrobacterales;s__unidentified_Solirubrobacterales	0.9981873548764854
ASV_5189	d__Bacteria;p__Proteobacteria;c__Betaproteobacteria;o__Burkholderiales;f__Comamonadaceae;g__unclassified_Comamonadaceae;s__unclassified_Comamonadaceae	0.9999962672532038
ASV_7977	d__Bacteria;p__Firmicutes;c__Clostridia;o__Clostridiales;f__Lachnospiraceae;g__Coprococcus;s__unidentified_Coprococcus	0.9960009559576262
ASV_17686	d__Bacteria;p__Firmicutes;c__Clostridia;o__Clostridiales;f__Lachnospiraceae;g__unclassified_Lachnospiraceae;s__unclassified_Lachnospiraceae	0.9818148180125843
ASV_3944	d__Bacteria;p__Bacteroidetes;c__Bacteroidia;o__Bacteroidales;f__S24-7;g__unidentified_S24-7;s__unidentified_S24-7	0.9999619470231847
ASV_12243	d__Bacteria;p__Fusobacteria;c__Fusobacteriia;o__Fusobacteriales;f__Fusobacteriaceae;g__Cetobacterium;s__Cetobacterium_somerae	0.719814335354506
ASV_2269	d__Bacteria;p__Bacteroidetes;c__Bacteroidia;o__Bacteroidales;f__BS11;g__unidentified_BS11;s__unidentified_BS11	0.9999203956932059
ASV_12441	d__Bacteria;p__Firmicutes;c__Clostridia;o__Clostridiales;f__Clostridiaceae;g__Clostridium;s__Clostridium_thermopalmarium	0.9999983168865991
ASV_3496	d__Bacteria;p__Chloroflexi;c__TK17;o__mle1-48;f__unidentified_mle1-48;g__unidentified_mle1-48;s__unidentified_mle1-48	0.9999999962462596
ASV_18536	d__Bacteria;p__Actinobacteria;c__Actinobacteria;o__Actinomycetales;f__Micromonosporaceae;g__Micromonospora;s__unclassified_Micromonospora	0.9082917187429806
ASV_3146	d__Bacteria;p__Firmicutes;c__Clostridia;o__Clostridiales;f__Ruminococcaceae;g__unidentified_Ruminococcaceae;s__unidentified_Ruminococcaceae	0.9796170773945093
ASV_15603	d__Bacteria;p__Firmicutes;c__Clostridia;o__Clostridiales;f__unclassified_Clostridiales;g__unclassified_Clostridiales;s__unclassified_Clostridiales	0.9999999989120971
ASV_24464	d__Bacteria;p__Firmicutes;c__Clostridia;o__Clostridiales;f__Peptostreptococcaceae;g__unidentified_Peptostreptococcaceae;s__unidentified_Peptostreptococcaceae	0.927399235951761
ASV_16973	d__Bacteria;p__Proteobacteria;c__Alphaproteobacteria;o__Rhodospirillales;f__Rhodospirillaceae;g__unidentified_Rhodospirillaceae;s__unidentified_Rhodospirillaceae	0.998276596895085
ASV_18005	d__Bacteria;p__Proteobacteria;c__Alphaproteobacteria;o__Rhodobacterales;f__Rhodobacteraceae;g__Paracoccus;s__unclassified_Paracoccus	0.9985439274892961
ASV_19501	d__Bacteria;p__Actinobacteria;c__Actinobacteria;o__Actinomycetales;f__Nocardioidaceae;g__unclassified_Nocardioidaceae;s__unclassified_Nocardioidaceae	0.9997480159430594
ASV_5285	d__Bacteria;p__Gemmatimonadetes;c__Gemmatimonadetes;o__Ellin5290;f__unidentified_Ellin5290;g__unidentified_Ellin5290;s__unidentified_Ellin5290	0.9999833568449218
ASV_13586	d__Bacteria;p__Proteobacteria;c__Betaproteobacteria;o__SC-I-84;f__unidentified_SC-I-84;g__unidentified_SC-I-84;s__unidentified_SC-I-84	0.9999533218644074
ASV_19822	d__Bacteria;p__TM7;c__TM7-1;o__unidentified_TM7-1;f__unidentified_TM7-1;g__unidentified_TM7-1;s__unidentified_TM7-1	0.9999987515865433
ASV_15783	d__Bacteria;p__unclassified_Bacteria;c__unclassified_Bacteria;o__unclassified_Bacteria;f__unclassified_Bacteria;g__unclassified_Bacteria;s__unclassified_Bacteria	0.9999999999447775
ASV_4261	d__Bacteria;p__Proteobacteria;c__Alphaproteobacteria;o__Ellin329;f__unidentified_Ellin329;g__unidentified_Ellin329;s__unidentified_Ellin329	0.9998043340819827
ASV_2761	d__Bacteria;p__Actinobacteria;c__Actinobacteria;o__Actinomycetales;f__Thermomonosporaceae;g__Actinoallomurus;s__unidentified_Actinoallomurus	0.7138780973971485
ASV_12167	d__Bacteria;p__unclassified_Bacteria;c__unclassified_Bacteria;o__unclassified_Bacteria;f__unclassified_Bacteria;g__unclassified_Bacteria;s__unclassified_Bacteria	0.9999999999668796
ASV_21535	d__Bacteria;p__TM7;c__TM7-3;o__I025;f__unidentified_I025;g__unidentified_I025;s__unidentified_I025	0.9999999838422299
ASV_10519	d__Bacteria;p__Firmicutes;c__Bacilli;o__Lactobacillales;f__Lactobacillaceae;g__Lactobacillus;s__Lactobacillus_vaginalis	0.8347653829573133
ASV_11875	d__Bacteria;p__Proteobacteria;c__Alphaproteobacteria;o__Caulobacterales;f__Caulobacteraceae;g__unclassified_Caulobacteraceae;s__unclassified_Caulobacteraceae	0.9999959817331672
ASV_22717	d__Bacteria;p__Planctomycetes;c__Planctomycetia;o__Gemmatales;f__Gemmataceae;g__unidentified_Gemmataceae;s__unidentified_Gemmataceae	0.9971634924128131
ASV_15577	d__Bacteria;p__Actinobacteria;c__Actinobacteria;o__Actinomycetales;f__Micromonosporaceae;g__unclassified_Micromonosporaceae;s__unclassified_Micromonosporaceae	0.999644419290259
ASV_16282	d__Bacteria;p__Proteobacteria;c__Alphaproteobacteria;o__Rhizobiales;f__Hyphomicrobiaceae;g__Rhodoplanes;s__unidentified_Rhodoplanes	0.7301789518318018
ASV_2565	d__Bacteria;p__Firmicutes;c__Clostridia;o__Clostridiales;f__Veillonellaceae;g__Phascolarctobacterium;s__unidentified_Phascolarctobacterium	0.9916247278017618
ASV_18843	d__Bacteria;p__Proteobacteria;c__Betaproteobacteria;o__Burkholderiales;f__Comamonadaceae;g__Polaromonas;s__unidentified_Polaromonas	0.9668535166942154
ASV_1548	d__Bacteria;p__Firmicutes;c__Clostridia;o__Clostridiales;f__unidentified_Clostridiales;g__unidentified_Clostridiales;s__unidentified_Clostridiales	0.7449683999758279
ASV_13326	d__Bacteria;p__Spirochaetes;c__Spirochaetes;o__Spirochaetales;f__Spirochaetaceae;g__Treponema;s__unidentified_Treponema	0.9999431967593251
ASV_19319	d__Bacteria;p__Firmicutes;c__Clostridia;o__Clostridiales;f__Lachnospiraceae;g__unidentified_Lachnospiraceae;s__unidentified_Lachnospiraceae	0.8859489809084391
ASV_19587	d__Bacteria;p__Proteobacteria;c__Betaproteobacteria;o__Burkholderiales;f__Comamonadaceae;g__Limnobacter;s__unidentified_Limnobacter	0.9997971372419105
ASV_18477	d__Bacteria;p__Firmicutes;c__Clostridia;o__Clostridiales;f__[Mogibacteriaceae];g__unidentified_[Mogibacteriaceae];s__unidentified_[Mogibacteriaceae]	0.9995794552310344
ASV_22195	d__Bacteria;p__Proteobacteria;c__Betaproteobacteria;o__Burkholderiales;f__Comamonadaceae;g__Tepidimonas;s__unidentified_Tepidimonas	0.9994909997612534
ASV_6009	d__Bacteria;p__Firmicutes;c__Clostridia;o__Clostridiales;f__Ruminococcaceae;g__unidentified_Ruminococcaceae;s__unidentified_Ruminococcaceae	0.9784865166986073
ASV_16749	d__Bacteria;p__Firmicutes;c__Clostridia;o__Clostridiales;f__Ruminococcaceae;g__unidentified_Ruminococcaceae;s__unidentified_Ruminococcaceae	0.9989542892552058
ASV_21096	d__Bacteria;p__TM7;c__TM7-1;o__unidentified_TM7-1;f__unidentified_TM7-1;g__unidentified_TM7-1;s__unidentified_TM7-1	0.9999974275844583
ASV_1649	d__Bacteria;p__Firmicutes;c__Clostridia;o__Clostridiales;f__Ruminococcaceae;g__unidentified_Ruminococcaceae;s__unidentified_Ruminococcaceae	0.9605224148722212
ASV_12040	d__Bacteria;p__Firmicutes;c__Clostridia;o__Clostridiales;f__unclassified_Clostridiales;g__unclassified_Clostridiales;s__unclassified_Clostridiales	0.9999998818381673
ASV_20934	d__Bacteria;p__Actinobacteria;c__Actinobacteria;o__Actinomycetales;f__Intrasporangiaceae;g__unclassified_Intrasporangiaceae;s__unclassified_Intrasporangiaceae	0.9978468397243354
ASV_24174	d__Bacteria;p__Firmicutes;c__Clostridia;o__Clostridiales;f__Peptostreptococcaceae;g__Proteocatella;s__Proteocatella_sphenisci	0.9999999767182148
ASV_9211	d__Bacteria;p__Proteobacteria;c__Alphaproteobacteria;o__Rhizobiales;f__Bradyrhizobiaceae;g__Bradyrhizobium;s__unidentified_Bradyrhizobium	0.7691830508976767
ASV_3607	d__Bacteria;p__Actinobacteria;c__Actinobacteria;o__Actinomycetales;f__Nocardioidaceae;g__Nocardioides;s__unidentified_Nocardioides	0.7941994633063101
ASV_15081	d__Bacteria;p__Actinobacteria;c__Acidimicrobiia;o__Acidimicrobiales;f__unidentified_Acidimicrobiales;g__unidentified_Acidimicrobiales;s__unidentified_Acidimicrobiales	0.9999884799932968
ASV_1898	d__Bacteria;p__Firmicutes;c__Clostridia;o__Clostridiales;f__Ruminococcaceae;g__Faecalibacterium;s__Faecalibacterium_prausnitzii	0.9990893738003299
ASV_19582	d__Bacteria;p__Proteobacteria;c__Alphaproteobacteria;o__Rhodospirillales;f__Rhodospirillaceae;g__unidentified_Rhodospirillaceae;s__unidentified_Rhodospirillaceae	0.997244878356837
ASV_8302	d__Bacteria;p__Proteobacteria;c__Alphaproteobacteria;o__Rhizobiales;f__Hyphomicrobiaceae;g__Rhodoplanes;s__unidentified_Rhodoplanes	0.9987638901179959
ASV_19510	d__Bacteria;p__Proteobacteria;c__Gammaproteobacteria;o__Legionellales;f__Legionellaceae;g__unidentified_Legionellaceae;s__unidentified_Legionellaceae	0.8136973308718196
ASV_13725	d__Bacteria;p__Actinobacteria;c__Actinobacteria;o__Actinomycetales;f__unclassified_Actinomycetales;g__unclassified_Actinomycetales;s__unclassified_Actinomycetales	0.9909309289468908
ASV_19804	d__Bacteria;p__Firmicutes;c__Clostridia;o__Clostridiales;f__Peptostreptococcaceae;g__unclassified_Peptostreptococcaceae;s__unclassified_Peptostreptococcaceae	0.7333994341686186
ASV_1855	d__Bacteria;p__Chloroflexi;c__Anaerolineae;o__Caldilineales;f__Caldilineaceae;g__unidentified_Caldilineaceae;s__unidentified_Caldilineaceae	0.9995501211694114
ASV_22860	d__Bacteria;p__Bacteroidetes;c__Bacteroidia;o__Bacteroidales;f__Prevotellaceae;g__Prevotella;s__unidentified_Prevotella	0.9991466192691555
ASV_7035	d__Bacteria;p__Firmicutes;c__Clostridia;o__Clostridiales;f__Clostridiaceae;g__Proteiniclasticum;s__unidentified_Proteiniclasticum	0.9995660243098279
ASV_26363	d__Bacteria;p__Actinobacteria;c__Actinobacteria;o__Actinomycetales;f__Nocardioidaceae;g__Nocardioides;s__unclassified_Nocardioides	0.9609862699226521
ASV_14254	d__Bacteria;p__Actinobacteria;c__Actinobacteria;o__Actinomycetales;f__Micromonosporaceae;g__unclassified_Micromonosporaceae;s__unclassified_Micromonosporaceae	0.9864164432695505
ASV_5137	d__Bacteria;p__Firmicutes;c__Clostridia;o__Clostridiales;f__Clostridiaceae;g__Clostridium;s__Clostridium_celatum	0.7014896795872011
ASV_26105	d__Bacteria;p__Proteobacteria;c__Gammaproteobacteria;o__Legionellales;f__Coxiellaceae;g__unidentified_Coxiellaceae;s__unidentified_Coxiellaceae	0.9997028123968354
ASV_21263	d__Bacteria;p__Bacteroidetes;c__Bacteroidia;o__Bacteroidales;f__Bacteroidaceae;g__Bacteroides;s__Bacteroides_plebeius	0.9999996323298711
ASV_9487	d__Bacteria;p__Bacteroidetes;c__Bacteroidia;o__Bacteroidales;f__[Paraprevotellaceae];g__CF231;s__unidentified_CF231	0.9999304606976334
ASV_12101	d__Bacteria;p__Bacteroidetes;c__Bacteroidia;o__Bacteroidales;f__Bacteroidaceae;g__Bacteroides;s__unidentified_Bacteroides	0.9999730967914544
ASV_17725	d__Bacteria;p__Firmicutes;c__Clostridia;o__Clostridiales;f__Lachnospiraceae;g__Roseburia;s__unidentified_Roseburia	0.8899004282871595
ASV_16277	d__Bacteria;p__Firmicutes;c__Clostridia;o__Clostridiales;f__Lachnospiraceae;g__Coprococcus;s__unidentified_Coprococcus	0.9573827718807731
ASV_22719	d__Bacteria;p__Proteobacteria;c__Alphaproteobacteria;o__Sphingomonadales;f__Sphingomonadaceae;g__Sphingomonas;s__unclassified_Sphingomonas	0.9836393661144354
ASV_19300	d__Bacteria;p__Firmicutes;c__Clostridia;o__Clostridiales;f__unidentified_Clostridiales;g__unidentified_Clostridiales;s__unidentified_Clostridiales	0.7959763928594197
ASV_25432	d__Bacteria;p__Proteobacteria;c__Alphaproteobacteria;o__Rhizobiales;f__Rhizobiaceae;g__Shinella;s__unidentified_Shinella	0.7190115236204686
ASV_1105	d__Bacteria;p__Firmicutes;c__Clostridia;o__Clostridiales;f__Ruminococcaceae;g__Oscillospira;s__unidentified_Oscillospira	0.9591996954533477
ASV_1609	d__Bacteria;p__Firmicutes;c__Clostridia;o__Clostridiales;f__[Tissierellaceae];g__Sedimentibacter;s__unidentified_Sedimentibacter	0.999999992586055
ASV_24617	d__Bacteria;p__Bacteroidetes;c__Sphingobacteriia;o__Sphingobacteriales;f__Sphingobacteriaceae;g__unclassified_Sphingobacteriaceae;s__unclassified_Sphingobacteriaceae	0.9697220717332496
ASV_19803	d__Bacteria;p__Firmicutes;c__Clostridia;o__Clostridiales;f__Ruminococcaceae;g__unidentified_Ruminococcaceae;s__unidentified_Ruminococcaceae	0.9948783193562932
ASV_22373	d__Bacteria;p__Firmicutes;c__Bacilli;o__Bacillales;f__Bacillaceae;g__Bacillus;s__Bacillus_fumarioli	0.9889788729796838
ASV_21292	d__Bacteria;p__Bacteroidetes;c__Flavobacteriia;o__Flavobacteriales;f__Flavobacteriaceae;g__Flavobacterium;s__Flavobacterium_frigidarium	0.997240979140298
ASV_11424	d__Bacteria;p__Actinobacteria;c__Actinobacteria;o__Actinomycetales;f__Micromonosporaceae;g__unclassified_Micromonosporaceae;s__unclassified_Micromonosporaceae	0.9997366838975946
ASV_5015	d__Bacteria;p__Actinobacteria;c__Actinobacteria;o__Actinomycetales;f__Micromonosporaceae;g__Pilimelia;s__unclassified_Pilimelia	0.8188882482578976
ASV_10056	d__Bacteria;p__Proteobacteria;c__Alphaproteobacteria;o__Rhizobiales;f__Bradyrhizobiaceae;g__unclassified_Bradyrhizobiaceae;s__unclassified_Bradyrhizobiaceae	0.999971069732035
ASV_8842	d__Bacteria;p__Proteobacteria;c__Betaproteobacteria;o__Nitrosomonadales;f__Nitrosomonadaceae;g__Nitrosovibrio;s__Nitrosovibrio_tenuis	0.8252241618958566
ASV_9031	d__Bacteria;p__Bacteroidetes;c__[Saprospirae];o__[Saprospirales];f__Chitinophagaceae;g__unidentified_Chitinophagaceae;s__unidentified_Chitinophagaceae	0.9880855645619625
ASV_6552	d__Bacteria;p__Firmicutes;c__Clostridia;o__Clostridiales;f__Lachnospiraceae;g__unidentified_Lachnospiraceae;s__unidentified_Lachnospiraceae	0.866887174050116
ASV_2953	d__Bacteria;p__Proteobacteria;c__Alphaproteobacteria;o__Rhodospirillales;f__Acetobacteraceae;g__Roseomonas;s__unidentified_Roseomonas	0.999879411362569
ASV_6907	d__Bacteria;p__Proteobacteria;c__Gammaproteobacteria;o__Pseudomonadales;f__Moraxellaceae;g__Acinetobacter;s__Acinetobacter_guillouiae	0.7115312226915371
ASV_24578	d__Bacteria;p__Firmicutes;c__Clostridia;o__Clostridiales;f__Ruminococcaceae;g__Oscillospira;s__unidentified_Oscillospira	0.9998130483248214
ASV_20899	d__Bacteria;p__Actinobacteria;c__Acidimicrobiia;o__Acidimicrobiales;f__AKIW874;g__unidentified_AKIW874;s__unidentified_AKIW874	0.9998528888383205
ASV_16087	d__Bacteria;p__Firmicutes;c__Bacilli;o__Bacillales;f__Planococcaceae;g__unclassified_Planococcaceae;s__unclassified_Planococcaceae	0.7735357721537701
ASV_20616	d__Bacteria;p__Bacteroidetes;c__Bacteroidia;o__Bacteroidales;f__BS11;g__unidentified_BS11;s__unidentified_BS11	0.9999350434616143
ASV_7434	d__Bacteria;p__Bacteroidetes;c__Bacteroidia;o__Bacteroidales;f__unidentified_Bacteroidales;g__unidentified_Bacteroidales;s__unidentified_Bacteroidales	0.9894054392319496
ASV_1374	d__Bacteria;p__Actinobacteria;c__Actinobacteria;o__Actinomycetales;f__Nocardioidaceae;g__Nocardioides;s__unidentified_Nocardioides	0.8782066524103886
ASV_9483	d__Bacteria;p__Actinobacteria;c__Actinobacteria;o__Actinomycetales;f__Intrasporangiaceae;g__unclassified_Intrasporangiaceae;s__unclassified_Intrasporangiaceae	0.9895814364464773
ASV_944	d__Bacteria;p__Gemmatimonadetes;c__Gemmatimonadetes;o__Ellin5290;f__unidentified_Ellin5290;g__unidentified_Ellin5290;s__unidentified_Ellin5290	0.9961413689280664
ASV_6176	d__Bacteria;p__Proteobacteria;c__Alphaproteobacteria;o__Rhodospirillales;f__Rhodospirillaceae;g__unidentified_Rhodospirillaceae;s__unidentified_Rhodospirillaceae	0.9895606065936052
ASV_5173	d__Bacteria;p__Proteobacteria;c__Gammaproteobacteria;o__Legionellales;f__unclassified_Legionellales;g__unclassified_Legionellales;s__unclassified_Legionellales	0.9998640475374945
ASV_18313	d__Bacteria;p__Proteobacteria;c__Alphaproteobacteria;o__Rhodospirillales;f__Rhodospirillaceae;g__Reyranella;s__Reyranella_massiliensis	0.9405421412836158
ASV_22462	d__Bacteria;p__Proteobacteria;c__Gammaproteobacteria;o__Pseudomonadales;f__Moraxellaceae;g__Acinetobacter;s__unidentified_Acinetobacter	0.995159874075603
ASV_15788	d__Bacteria;p__Proteobacteria;c__Alphaproteobacteria;o__Caulobacterales;f__Caulobacteraceae;g__unclassified_Caulobacteraceae;s__unclassified_Caulobacteraceae	0.9999999971408413
ASV_19408	d__Bacteria;p__Proteobacteria;c__Betaproteobacteria;o__Burkholderiales;f__Oxalobacteraceae;g__unclassified_Oxalobacteraceae;s__unclassified_Oxalobacteraceae	0.9999974702871778
ASV_23934	d__Bacteria;p__Firmicutes;c__Clostridia;o__Clostridiales;f__unidentified_Clostridiales;g__unidentified_Clostridiales;s__unidentified_Clostridiales	0.9999056015404919
ASV_10192	d__Bacteria;p__Bacteroidetes;c__Bacteroidia;o__Bacteroidales;f__Bacteroidaceae;g__Bacteroides;s__unidentified_Bacteroides	0.9999987479471195
ASV_20687	d__Bacteria;p__Actinobacteria;c__Coriobacteriia;o__Coriobacteriales;f__Coriobacteriaceae;g__Adlercreutzia;s__unidentified_Adlercreutzia	0.927552767336242
ASV_17390	d__Bacteria;p__Firmicutes;c__Clostridia;o__Clostridiales;f__Ruminococcaceae;g__Oscillospira;s__unidentified_Oscillospira	0.9988524300921687
ASV_4960	d__Bacteria;p__Firmicutes;c__Clostridia;o__Clostridiales;f__Ruminococcaceae;g__unidentified_Ruminococcaceae;s__unidentified_Ruminococcaceae	0.9975098391768256
ASV_12966	d__Bacteria;p__Firmicutes;c__Clostridia;o__Clostridiales;f__Ruminococcaceae;g__Oscillospira;s__unidentified_Oscillospira	0.9922061800498108
ASV_1727	d__Bacteria;p__Firmicutes;c__Clostridia;o__Clostridiales;f__Ruminococcaceae;g__unidentified_Ruminococcaceae;s__unidentified_Ruminococcaceae	0.7377400236686209
ASV_9708	d__Bacteria;p__Tenericutes;c__Mollicutes;o__RF39;f__unidentified_RF39;g__unidentified_RF39;s__unidentified_RF39	0.9999999912949704
ASV_16133	d__Bacteria;p__Bacteroidetes;c__Bacteroidia;o__Bacteroidales;f__S24-7;g__unidentified_S24-7;s__unidentified_S24-7	0.9999416486795825
ASV_25468	d__Bacteria;p__Firmicutes;c__Clostridia;o__Clostridiales;f__Ruminococcaceae;g__Oscillospira;s__unidentified_Oscillospira	0.9986984628091896
ASV_15721	d__Bacteria;p__Bacteroidetes;c__Sphingobacteriia;o__Sphingobacteriales;f__Sphingobacteriaceae;g__unidentified_Sphingobacteriaceae;s__unidentified_Sphingobacteriaceae	0.9616206750072706
ASV_22185	d__Bacteria;p__Actinobacteria;c__Actinobacteria;o__Micrococcales;f__unidentified_Micrococcales;g__unidentified_Micrococcales;s__unidentified_Micrococcales	0.9999999980688585
ASV_5781	d__Bacteria;p__Proteobacteria;c__Alphaproteobacteria;o__Rhizobiales;f__Hyphomicrobiaceae;g__Rhodoplanes;s__unidentified_Rhodoplanes	0.9999848127372027
ASV_6588	d__Bacteria;p__Proteobacteria;c__Gammaproteobacteria;o__Oceanospirillales;f__Oceanospirillaceae;g__Marinomonas;s__Marinomonas_primoryensis	0.9939122831503816
ASV_14996	d__Bacteria;p__Firmicutes;c__Clostridia;o__Clostridiales;f__Ruminococcaceae;g__Ruminococcus;s__unidentified_Ruminococcus	0.9999371333987573
ASV_43	d__Bacteria;p__Firmicutes;c__Clostridia;o__Clostridiales;f__Lachnospiraceae;g__unidentified_Lachnospiraceae;s__unidentified_Lachnospiraceae	0.8886590176591675
ASV_6576	d__Bacteria;p__Firmicutes;c__Clostridia;o__Clostridiales;f__Lachnospiraceae;g__unidentified_Lachnospiraceae;s__unidentified_Lachnospiraceae	0.7679958012032865
ASV_1805	d__Bacteria;p__Actinobacteria;c__Actinobacteria;o__Actinomycetales;f__unclassified_Actinomycetales;g__unclassified_Actinomycetales;s__unclassified_Actinomycetales	0.9999948883706473
ASV_8151	d__Bacteria;p__Actinobacteria;c__Actinobacteria;o__Actinomycetales;f__Nocardioidaceae;g__Nocardioides;s__unclassified_Nocardioides	0.9640192216243442
ASV_9723	d__Bacteria;p__Firmicutes;c__Clostridia;o__Clostridiales;f__unclassified_Clostridiales;g__unclassified_Clostridiales;s__unclassified_Clostridiales	0.9995228025803556
ASV_3472	d__Bacteria;p__Proteobacteria;c__Gammaproteobacteria;o__Legionellales;f__Legionellaceae;g__unclassified_Legionellaceae;s__unclassified_Legionellaceae	0.8179769370468066
ASV_14650	d__Bacteria;p__Actinobacteria;c__MB-A2-108;o__0319-7L14;f__unidentified_0319-7L14;g__unidentified_0319-7L14;s__unidentified_0319-7L14	0.9999999710884429
ASV_19124	d__Bacteria;p__Firmicutes;c__Clostridia;o__Clostridiales;f__[Acidaminobacteraceae];g__Fusibacter;s__unidentified_Fusibacter	0.9990130015742853
ASV_5851	d__Bacteria;p__Actinobacteria;c__Thermoleophilia;o__Gaiellales;f__Gaiellaceae;g__unidentified_Gaiellaceae;s__unidentified_Gaiellaceae	0.998438453500667
ASV_22492	d__Bacteria;p__Proteobacteria;c__Alphaproteobacteria;o__Rhizobiales;f__unidentified_Rhizobiales;g__unidentified_Rhizobiales;s__unidentified_Rhizobiales	0.9993369255675151
ASV_22142	d__Bacteria;p__Acidobacteria;c__Acidobacteria-6;o__iii1-15;f__RB40;g__unidentified_RB40;s__unidentified_RB40	0.9999999918331355
ASV_13399	d__Bacteria;p__[Thermi];c__Deinococci;o__Deinococcales;f__Trueperaceae;g__B-42;s__unidentified_B-42	0.9999999985448653
ASV_14469	d__Bacteria;p__Firmicutes;c__Bacilli;o__Bacillales;f__Planococcaceae;g__unclassified_Planococcaceae;s__unclassified_Planococcaceae	0.9999924835795029
ASV_23923	d__Bacteria;p__Bacteroidetes;c__Bacteroidia;o__Bacteroidales;f__S24-7;g__unidentified_S24-7;s__unidentified_S24-7	0.9999980754234957
ASV_7746	d__Bacteria;p__Firmicutes;c__Clostridia;o__Clostridiales;f__Clostridiaceae;g__Clostridium;s__unclassified_Clostridium	0.9335051026636669
ASV_7884	d__Bacteria;p__Proteobacteria;c__Gammaproteobacteria;o__Pseudomonadales;f__Moraxellaceae;g__Acinetobacter;s__Acinetobacter_lwoffii	0.8081774702134151
ASV_12995	d__Bacteria;p__Actinobacteria;c__Actinobacteria;o__Actinomycetales;f__Intrasporangiaceae;g__unclassified_Intrasporangiaceae;s__unclassified_Intrasporangiaceae	0.9927916228127303
ASV_3518	d__Bacteria;p__Proteobacteria;c__Gammaproteobacteria;o__Legionellales;f__Legionellaceae;g__Legionella;s__unclassified_Legionella	0.9323212558703151
ASV_13881	d__Bacteria;p__Proteobacteria;c__Betaproteobacteria;o__Burkholderiales;f__Burkholderiaceae;g__Burkholderia;s__unidentified_Burkholderia	0.985218286685205
ASV_20794	d__Bacteria;p__OD1;c__unidentified_OD1;o__unidentified_OD1;f__unidentified_OD1;g__unidentified_OD1;s__unidentified_OD1	0.769753050904917
ASV_3283	d__Bacteria;p__Bacteroidetes;c__Bacteroidia;o__Bacteroidales;f__S24-7;g__unidentified_S24-7;s__unidentified_S24-7	0.9999999838047701
ASV_23138	d__Bacteria;p__Firmicutes;c__Clostridia;o__Clostridiales;f__Ruminococcaceae;g__unidentified_Ruminococcaceae;s__unidentified_Ruminococcaceae	0.8545892717309904
ASV_9080	d__Bacteria;p__Firmicutes;c__Clostridia;o__Clostridiales;f__Ruminococcaceae;g__Ruminococcus;s__unidentified_Ruminococcus	0.9999872892284225
ASV_3512	d__Bacteria;p__Firmicutes;c__Clostridia;o__Clostridiales;f__unidentified_Clostridiales;g__unidentified_Clostridiales;s__unidentified_Clostridiales	0.9999550558198654
ASV_23985	d__Bacteria;p__Proteobacteria;c__Gammaproteobacteria;o__Legionellales;f__Legionellaceae;g__unclassified_Legionellaceae;s__unclassified_Legionellaceae	0.999927890268161
ASV_8640	d__Bacteria;p__Firmicutes;c__Clostridia;o__Clostridiales;f__Veillonellaceae;g__Phascolarctobacterium;s__unidentified_Phascolarctobacterium	0.9999999968562747
ASV_22454	d__Bacteria;p__Firmicutes;c__Clostridia;o__Clostridiales;f__Ruminococcaceae;g__unidentified_Ruminococcaceae;s__unidentified_Ruminococcaceae	0.929595664838319
ASV_26109	d__Bacteria;p__Bacteroidetes;c__Bacteroidia;o__Bacteroidales;f__S24-7;g__unidentified_S24-7;s__unidentified_S24-7	0.9998508543834476
ASV_9676	d__Bacteria;p__Firmicutes;c__Clostridia;o__Clostridiales;f__Lachnospiraceae;g__unidentified_Lachnospiraceae;s__unidentified_Lachnospiraceae	0.975161620594734
ASV_17891	d__Bacteria;p__Gemmatimonadetes;c__Gemmatimonadetes;o__Gemmatimonadales;f__Ellin5301;g__unidentified_Ellin5301;s__unidentified_Ellin5301	0.9969731553328703
ASV_259	d__Bacteria;p__Chloroflexi;c__unclassified_Chloroflexi;o__unclassified_Chloroflexi;f__unclassified_Chloroflexi;g__unclassified_Chloroflexi;s__unclassified_Chloroflexi	0.7851005635982926
ASV_17692	d__Bacteria;p__Bacteroidetes;c__Flavobacteriia;o__Flavobacteriales;f__Flavobacteriaceae;g__Flavobacterium;s__Flavobacterium_frigidarium	0.9991750238489602
ASV_21600	d__Bacteria;p__Actinobacteria;c__Actinobacteria;o__Actinomycetales;f__Propionibacteriaceae;g__Microlunatus;s__Microlunatus_panaciterrae	0.7710378316795208
ASV_354	d__Bacteria;p__Actinobacteria;c__Actinobacteria;o__Actinomycetales;f__Micromonosporaceae;g__Dactylosporangium;s__unidentified_Dactylosporangium	0.71626469714217
ASV_8832	d__Bacteria;p__Actinobacteria;c__Actinobacteria;o__Actinomycetales;f__Thermomonosporaceae;g__Actinoallomurus;s__Actinoallomurus_iriomotensis	0.7176109421295364
ASV_17962	d__Bacteria;p__Actinobacteria;c__Actinobacteria;o__Actinomycetales;f__Nocardioidaceae;g__unidentified_Nocardioidaceae;s__unidentified_Nocardioidaceae	0.9647940181669562
ASV_5747	d__Bacteria;p__Proteobacteria;c__Alphaproteobacteria;o__Rhizobiales;f__Hyphomicrobiaceae;g__Rhodoplanes;s__unidentified_Rhodoplanes	0.9999103799271044
ASV_25730	d__Bacteria;p__Bacteroidetes;c__[Saprospirae];o__[Saprospirales];f__Saprospiraceae;g__unidentified_Saprospiraceae;s__unidentified_Saprospiraceae	0.9999148281837948
ASV_24281	d__Bacteria;p__Firmicutes;c__Bacilli;o__Bacillales;f__Planococcaceae;g__Sporosarcina;s__unidentified_Sporosarcina	0.8059245767345207
ASV_12072	d__Bacteria;p__Verrucomicrobia;c__[Pedosphaerae];o__[Pedosphaerales];f__unidentified_[Pedosphaerales];g__unidentified_[Pedosphaerales];s__unidentified_[Pedosphaerales]	0.9937251584826056
ASV_5016	d__Bacteria;p__Bacteroidetes;c__Flavobacteriia;o__Flavobacteriales;f__Flavobacteriaceae;g__Flavobacterium;s__unidentified_Flavobacterium	0.8831507077691526
ASV_13800	d__Bacteria;p__Firmicutes;c__Clostridia;o__Clostridiales;f__Peptostreptococcaceae;g__Tepidibacter;s__unidentified_Tepidibacter	0.9953035771971273
ASV_10846	d__Bacteria;p__Actinobacteria;c__Actinobacteria;o__Actinomycetales;f__Micromonosporaceae;g__unclassified_Micromonosporaceae;s__unclassified_Micromonosporaceae	0.9999965798000728
ASV_8547	d__Bacteria;p__Firmicutes;c__Clostridia;o__Clostridiales;f__Lachnospiraceae;g__Coprococcus;s__unidentified_Coprococcus	0.9778149422686846
ASV_15536	d__Bacteria;p__unidentified_Bacteria;c__unidentified_Bacteria;o__unidentified_Bacteria;f__unidentified_Bacteria;g__unidentified_Bacteria;s__unidentified_Bacteria	0.867853369868456
ASV_19936	d__Bacteria;p__Actinobacteria;c__Actinobacteria;o__Actinomycetales;f__Thermomonosporaceae;g__Actinoallomurus;s__Actinoallomurus_iriomotensis	0.7545374790100138
ASV_26299	d__Bacteria;p__Firmicutes;c__Clostridia;o__Clostridiales;f__Ruminococcaceae;g__Butyricicoccus;s__Butyricicoccus_pullicaecorum	0.9999919532723737
ASV_8083	d__Bacteria;p__Proteobacteria;c__Gammaproteobacteria;o__Xanthomonadales;f__Xanthomonadaceae;g__Dyella;s__unclassified_Dyella	0.9437273758658115
ASV_24746	d__Bacteria;p__Proteobacteria;c__Alphaproteobacteria;o__Rhizobiales;f__Phyllobacteriaceae;g__Mesorhizobium;s__unidentified_Mesorhizobium	0.7607357182383375
ASV_9968	d__Bacteria;p__Proteobacteria;c__Gammaproteobacteria;o__Xanthomonadales;f__Xanthomonadaceae;g__unclassified_Xanthomonadaceae;s__unclassified_Xanthomonadaceae	0.9999173527053387
ASV_13716	d__Bacteria;p__Firmicutes;c__Clostridia;o__Clostridiales;f__unidentified_Clostridiales;g__unidentified_Clostridiales;s__unidentified_Clostridiales	0.9115574368595163
[truncated: 9,723 more rows]
