# Supplementary material for: Modulation of the gut microbiota by processed food and natural food: evidence from the Siniperca chuatsi microbiome
Source: PeerJ. 2024 Jun 14;12:e17520. doi: 10.7717/peerj.17520 (PMC11182020; doi:10.7717/peerj.17520)
Supplement: Supplemental Information 6 [file peerj-12-17520-s006.xlsx]

## Sheet: Sheet1
	Lipid in the muscle		Lipid droplet
No	FB	AF	FB	AF
1	0.62	0.83	493.5	1141.44
2	0.73	0.76	386.4	833.66
3	0.77	0.87	349.5	1361.8
4	0.66	0.73	460.59	1177.34
5	0.59	0.92	412.52	818.74
6	0.76	0.92	471.48	1487.38
