# Supplementary figures and images for: Modulation of the gut microbiota by processed food and natural food: evidence from the Siniperca chuatsi microbiome
Source: PeerJ journal article supplement (doi:10.7717/peerj.17520), 2024-06-14

Length Distribution

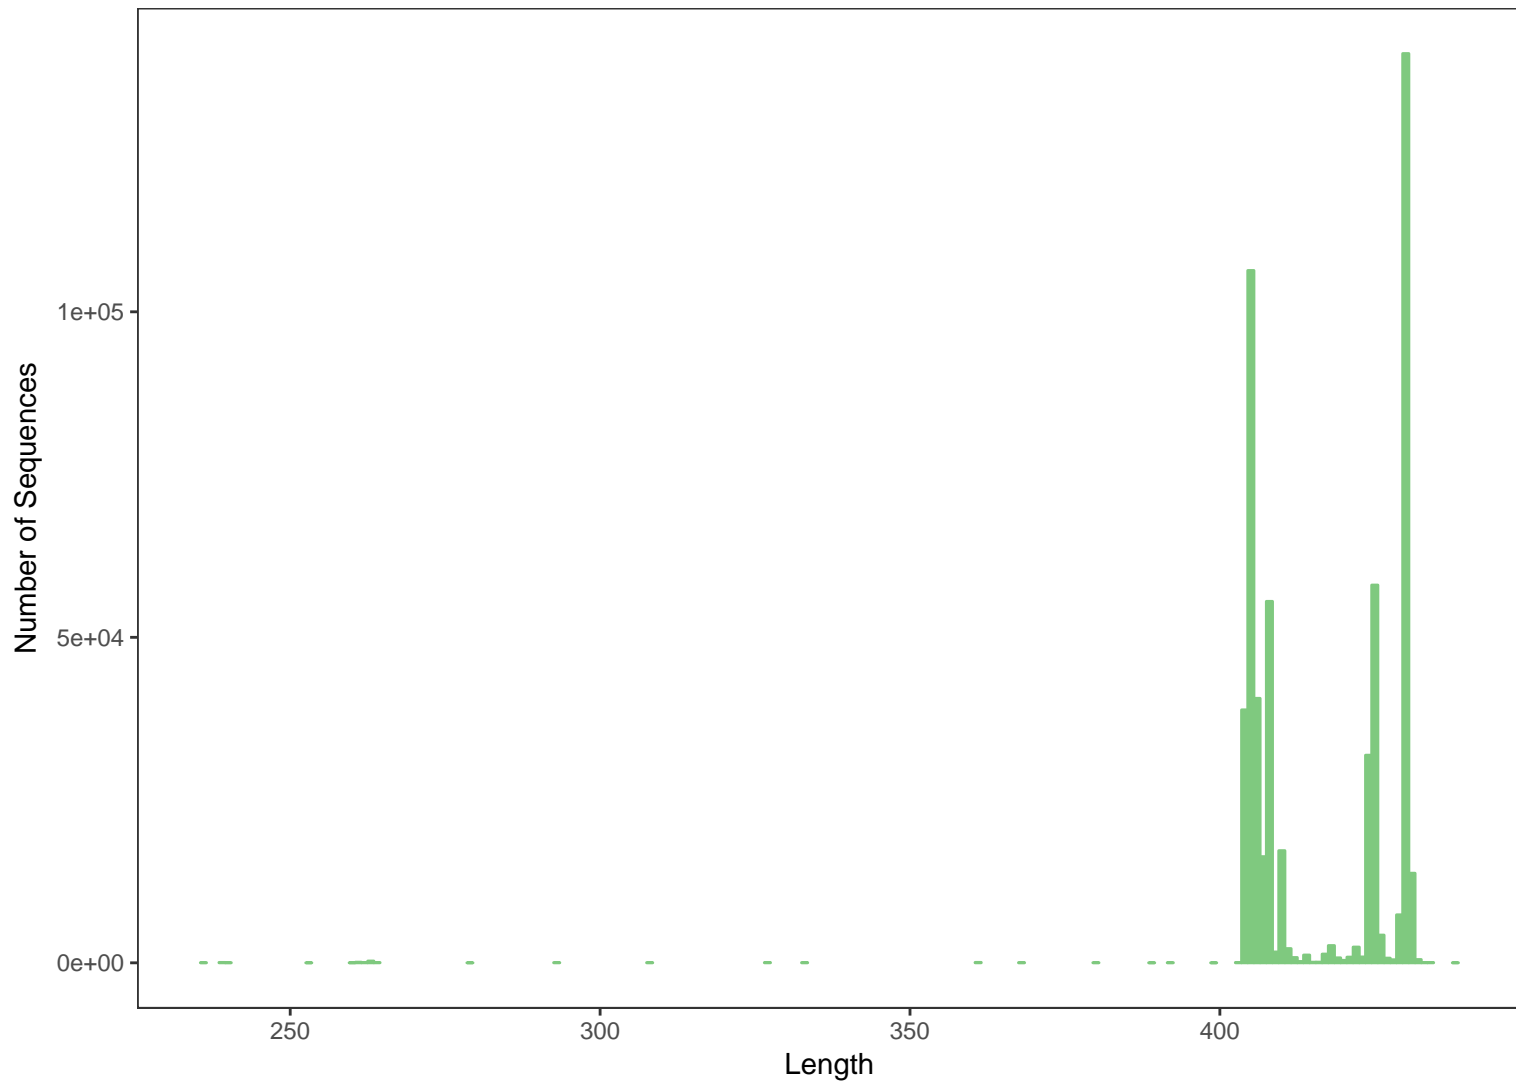

Supplement: RawData.7z [file Length_Distribution.pdf › PeerJ Raw data/2.1.2_sequences/Length_Distribution.pdf]

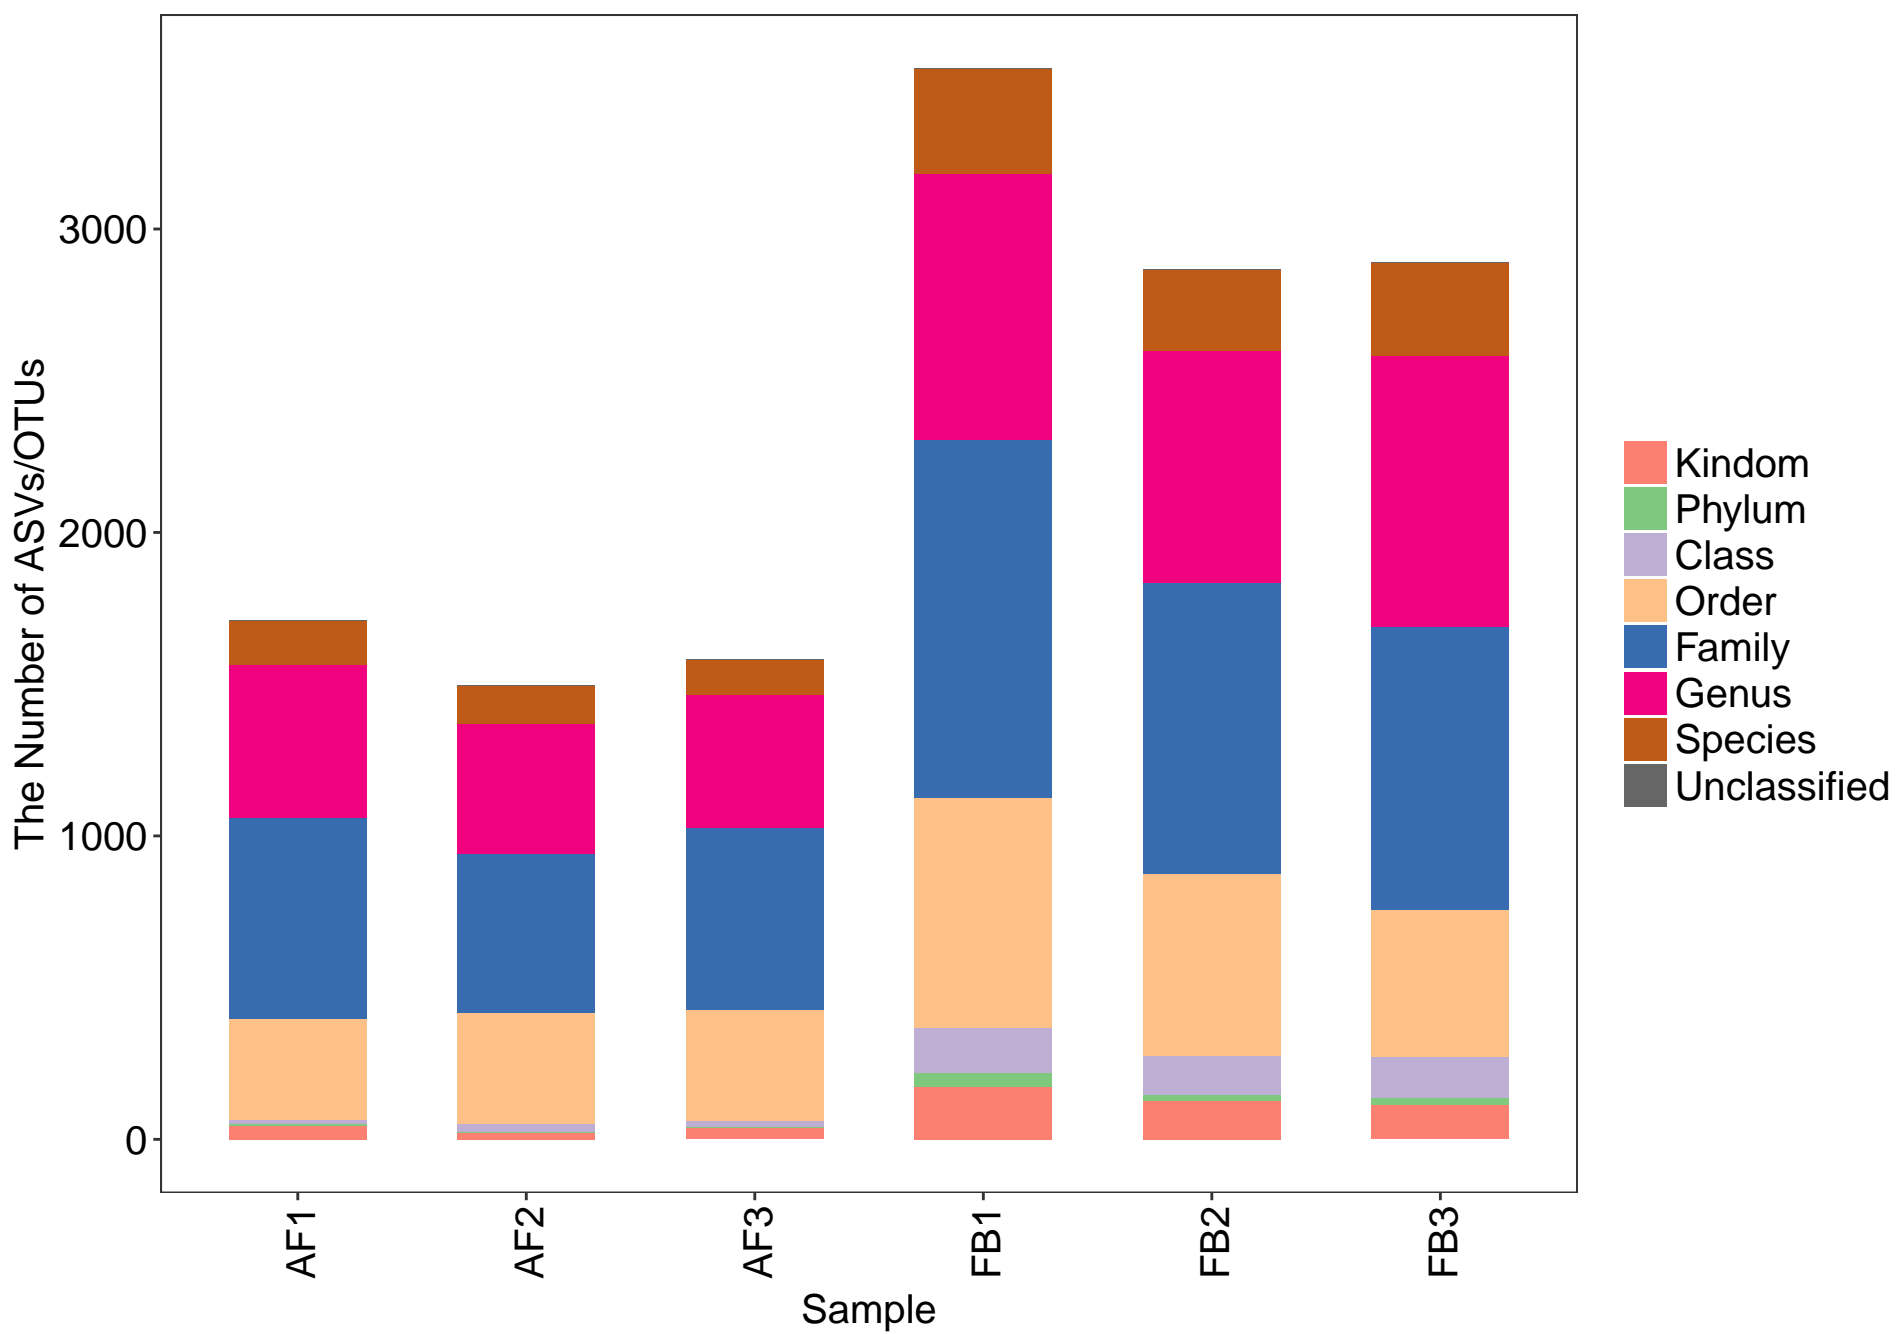

Supplement: RawData.7z [file OTU_count.pdf › PeerJ Raw data/2.1.3_taxonomy/OTU_count.pdf]

Rank Abundance Curve

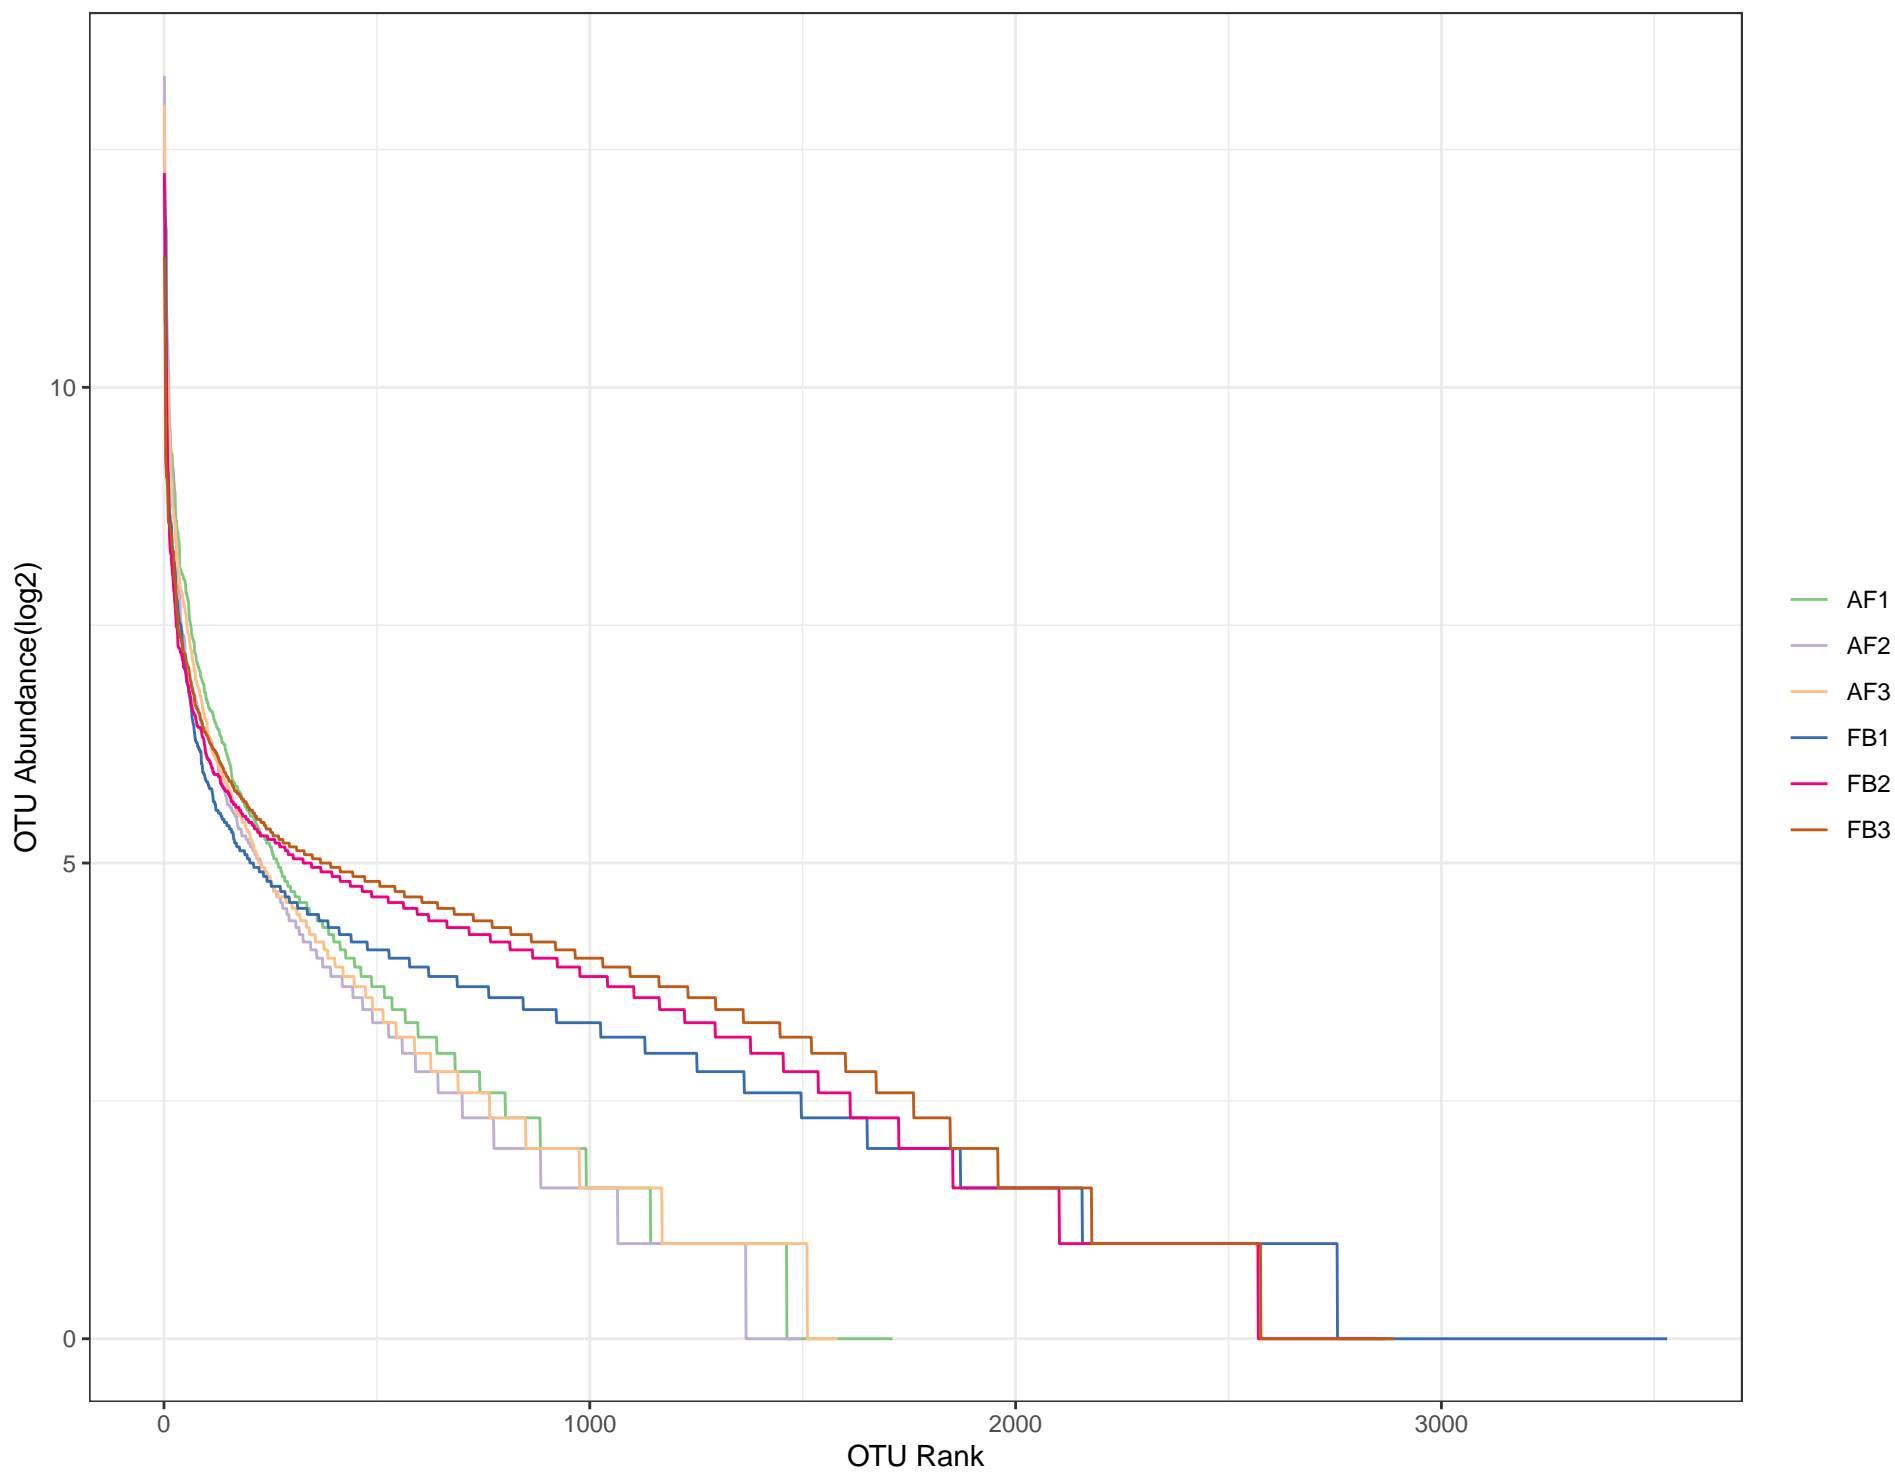

Supplement: RawData.7z [file rabund.pdf › PeerJ Raw data/2.3.4.2_rabund_sample/rabund.pdf]

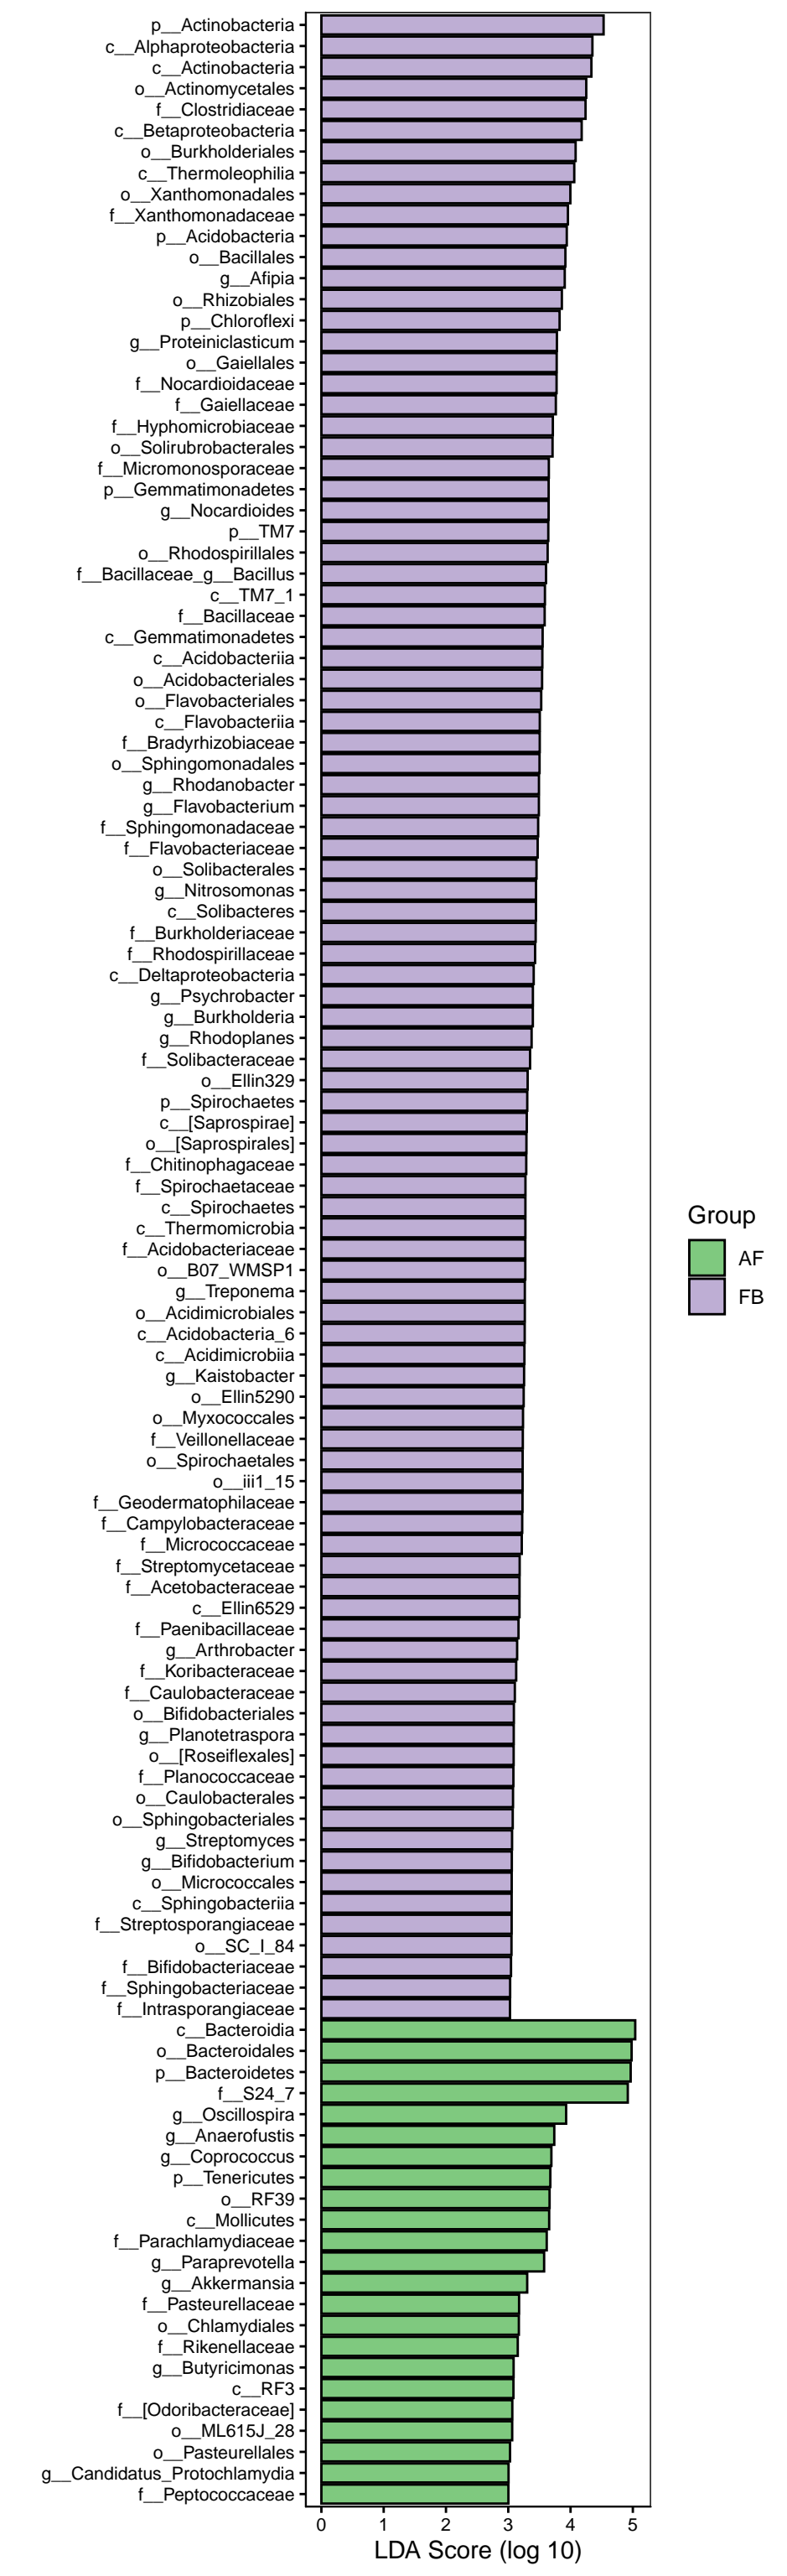

Supplement: RawData.7z [file lefse_effect_size_rank.pdf › PeerJ Raw data/2.5.5.2_lefse_3/lefse_effect_size_rank.pdf]

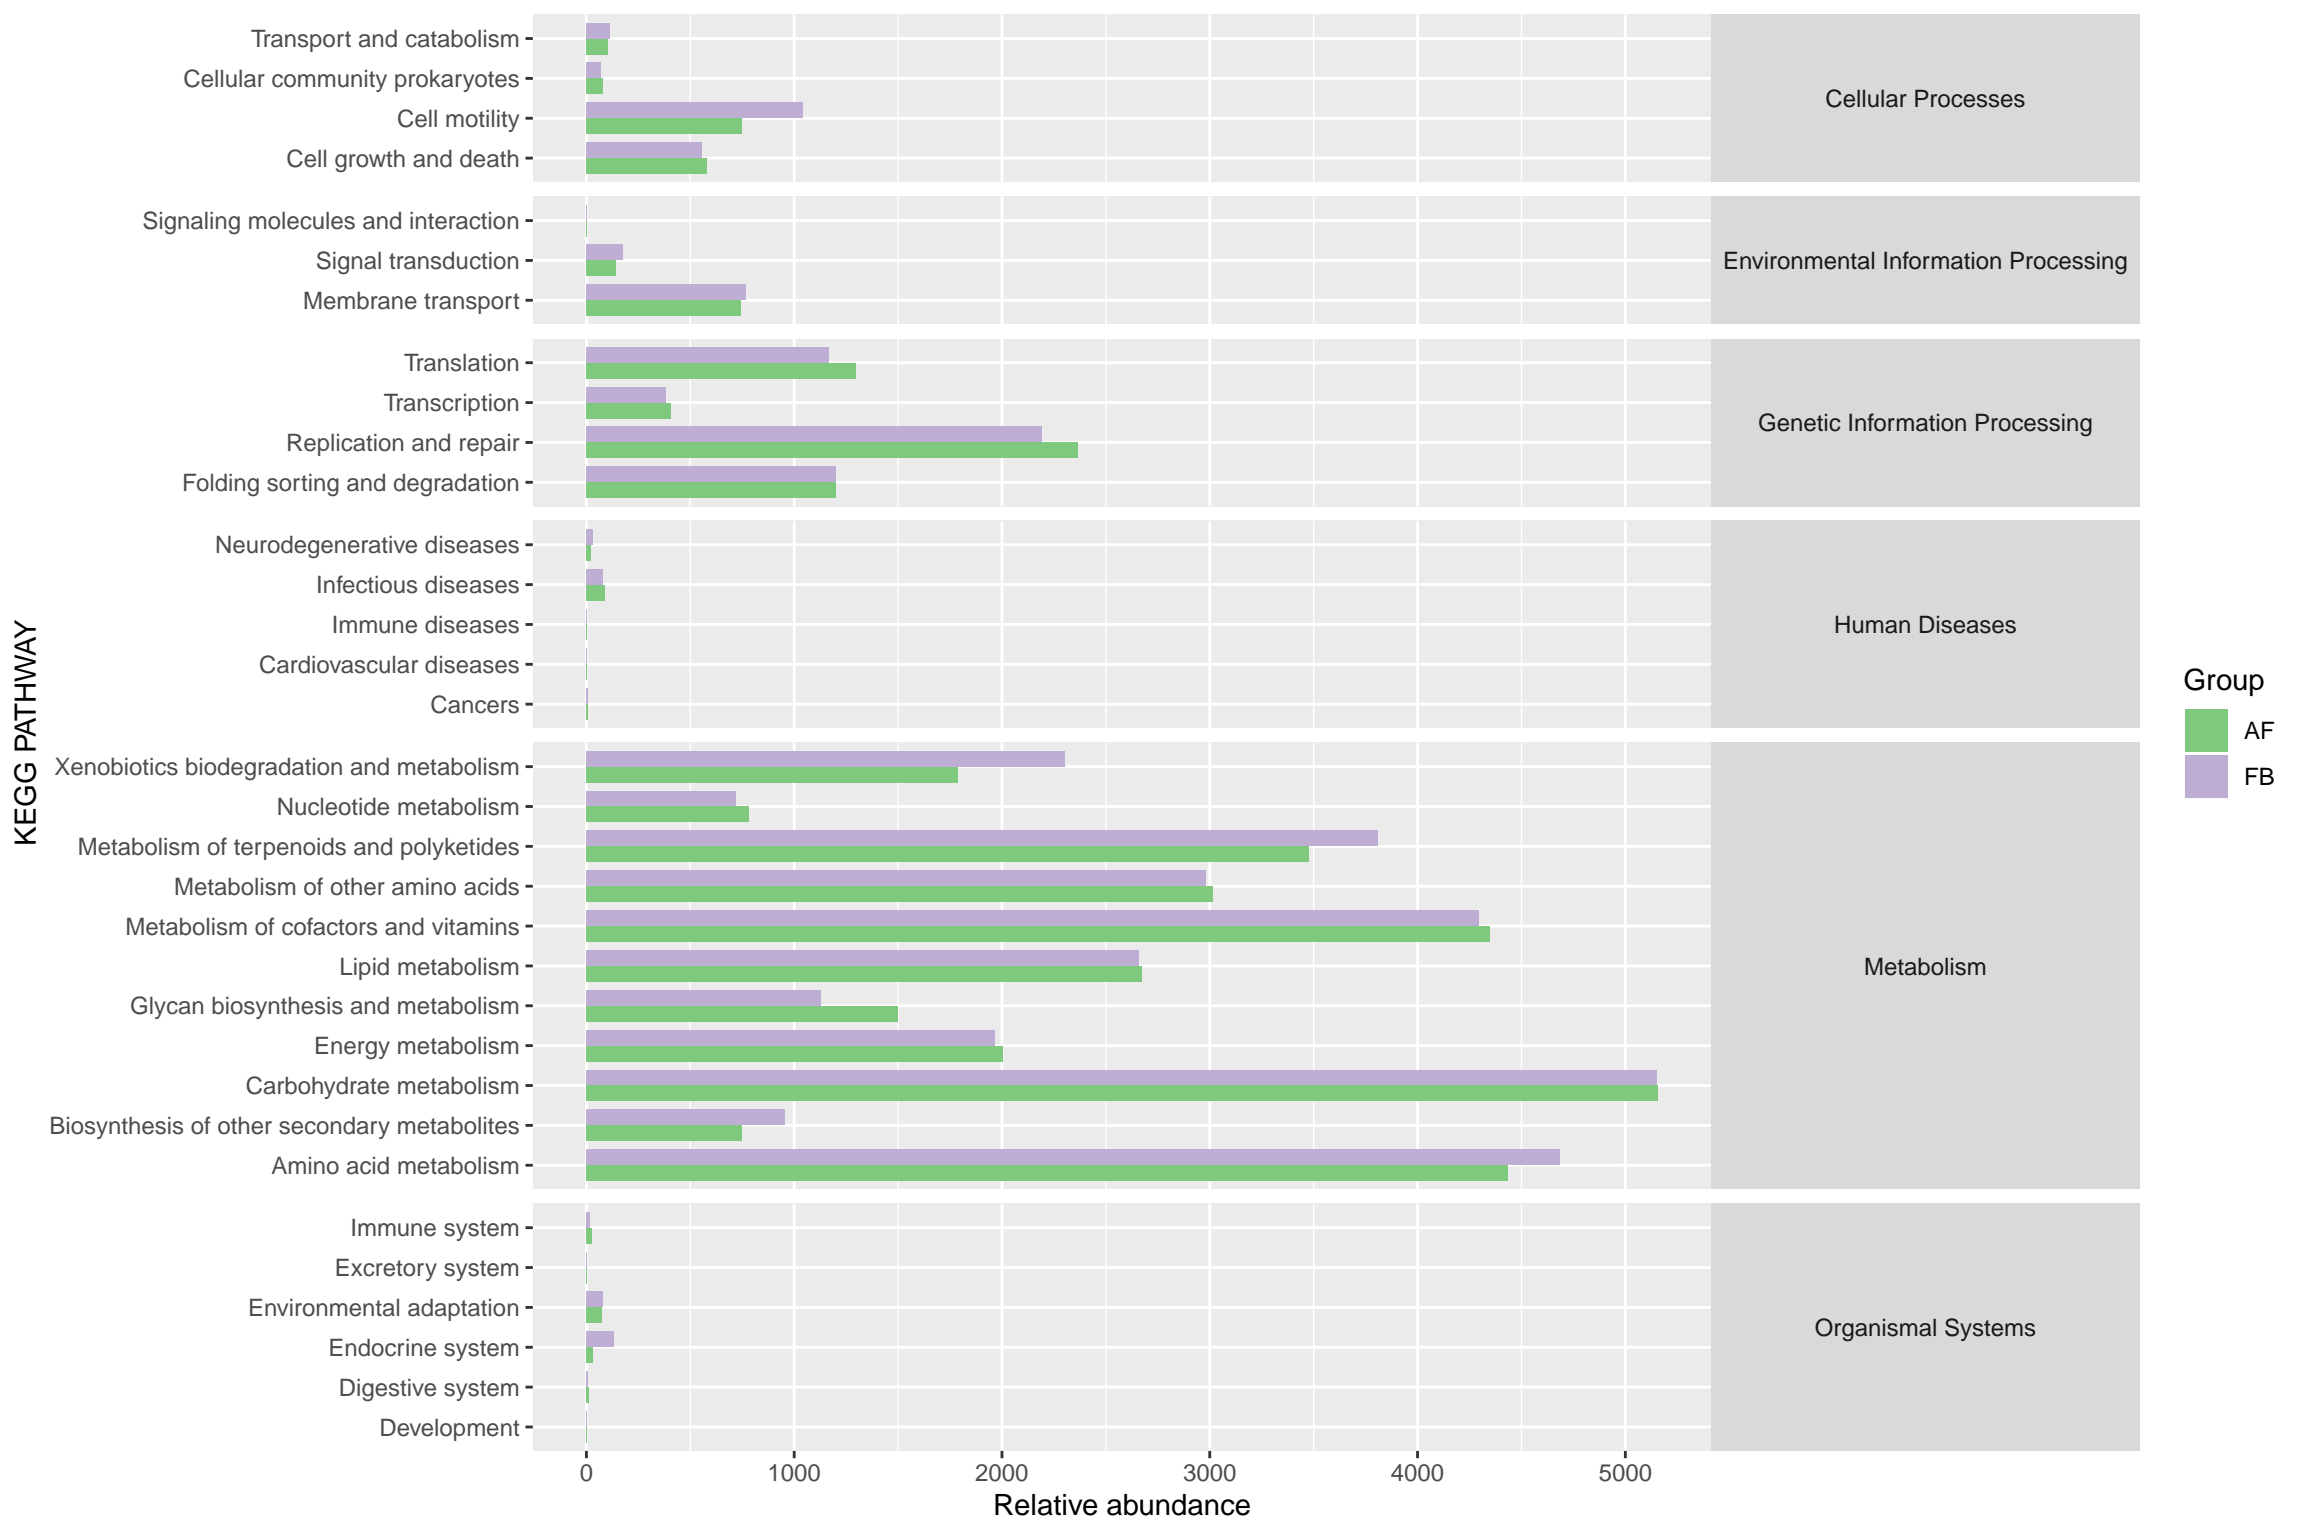

Supplement: RawData.7z [file KEGG_abund_group.pdf › PeerJ Raw data/2.7.3.2_path_stats_group/KEGG_abund_group.pdf]
